# Supplementary material for: Freshwater sponge hosts and their green algae symbionts: a tractable model to understand intracellular symbiosis
Source: PeerJ. 2021 Feb 11;9:e10654. doi: 10.7717/peerj.10654 (PMC7882143; doi:10.7717/peerj.10654)
Supplement: Supplemental Information 12 [file peerj-09-10654-s012.xlsx]

## Sheet: Genes
gene_id	gene_name	transcript_id	GO	KEGG	KO_ENTRY	EC	Description	FPKM.EmInf1	FPKM.EmInf2	FPKM.EmInf3	FPKM.EmApo1	FPKM.EmApo2	FPKM.EmApo3	fc	log2(fc)	pval	qval	regulation	significant
MSTRG.27938	Em0022g782a	Em0022g782a.t1	GO:0003824(catalytic activity);GO:0004497(monooxygenase activity);GO:0005507(copper ion binding);GO:0005737(cytoplasm);GO:0016020(membrane);GO:0016021(integral component of membrane);GO:0016491(oxidoreductase activity);GO:0016715(oxidoreductase activity, acting on paired donors, with incorporation or reduction of molecular oxygen, reduced ascorbate as one donor, and incorporation of one atom of o…	NA	NA	NA	PREDICTED: DBH-like monooxygenase protein 1 homolog [Amphimedon queenslandica]	71.5396	122.589	98.4906	4.57735	3.08994	3.5142	26.17	4.70984	9.62121e-61	1.90327e-56	up	yes
MSTRG.11625	Em0007g737a	Em0007g737a.t1	NA	NA	NA	NA		9.20292	12.1935	14.6627	0	0	0	inf	inf	9.93609e-50	9.82778e-46	up	yes
MSTRG.31182	Em0144g14a	Em0144g14a.t1	GO:0003746(translation elongation factor activity);GO:0004364(glutathione transferase activity);GO:0005634(nucleus);GO:0005737(cytoplasm);GO:0006749(glutathione metabolic process)	NA	NA	NA	PREDICTED: elongation factor 1-gamma-like [Amphimedon queenslandica]	0	0	0	15.5659	5.17968	20.6339	-inf	-inf	9.39686e-47	6.19629e-43	down	yes
MSTRG.27879	Em0022g770a	Em0022g770a.t1	GO:0003824(catalytic activity);GO:0004497(monooxygenase activity);GO:0005507(copper ion binding);GO:0005737(cytoplasm);GO:0016020(membrane);GO:0016021(integral component of membrane);GO:0016491(oxidoreductase activity);GO:0016715(oxidoreductase activity, acting on paired donors, with incorporation or reduction of molecular oxygen, reduced ascorbate as one donor, and incorporation of one atom of o…	NA	NA	NA	PREDICTED: DBH-like monooxygenase protein 1 [Amphimedon queenslandica]	23.5705	37.6273	30.2527	1.79166	0.90997	0.912095	25.3065	4.66143	1.7682e-46	8.74463e-43	up	yes
MSTRG.31379	Em0179g6a	Em0179g6a.t1	GO:0000165(MAPK cascade);GO:0003700(DNA binding transcription factor activity);GO:0005654(nucleoplasm);GO:0005730(nucleolus);GO:0006338(chromatin remodeling);GO:0006879(cellular iron ion homeostasis);GO:0006974(cellular response to DNA damage stimulus);GO:0010332(response to gamma radiation);GO:0032204(regulation of telomere maintenance);GO:0043280(positive regulation of cysteine-type endopeptida…	04310(Wnt signaling pathway);04350(TGF-beta signaling pathway)	K04377	NA	transcriptional regulator Myc-A-like [Exaiptasia pallida]	4.24975	5.50407	3.39864	0	0	0	inf	inf	7.32924e-41	2.89974e-37	up	yes
MSTRG.1082	Em0001g1335a	Em0001g1335a.t1	GO:0004364(glutathione transferase activity);GO:0005737(cytoplasm);GO:0006749(glutathione metabolic process)	00480(Glutathione metabolism);00980(Metabolism of xenobiotics by cytochrome P450);00982(Drug metabolism - cytochrome P450);00983(Drug metabolism - other enzymes)	K00799	EC:2.5.1.18	PREDICTED: glutathione S-transferase omega-1-like [Amphimedon queenslandica]	358.231	327.265	203.133	32.7427	39.1308	43.6481	7.69231	2.94342	2.49995e-35	8.24233e-32	up	yes
MSTRG.31872	Em0380g1a	Em0380g1a.t1	GO:0005044(scavenger receptor activity);GO:0005615(extracellular space);GO:0006898(receptor-mediated endocytosis);GO:0030670(phagocytic vesicle membrane);GO:0070062(extracellular exosome)	04970(Salivary secretion)	K13912	NA	deleted in malignant brain tumors 1 protein [Cyanistes caeruleus]	5.22093	3.19285	3.36936	0	0	0	inf	inf	5.00063e-34	1.41318e-30	up	yes
MSTRG.19087	Em0014g231a;Em0014g232a;Em0014g234a;Em0014g238a;Em0014g240a	Em0014g231a.t1;Em0014g232a.t1;Em0014g234a.t1;Em0014g238a.t1;Em0014g240a.t1	NA	NA	NA	NA		25.013	13.5586	32.7598	1.2028	0.422081	0.839075	28.9499	4.85549	1.56595e-33	3.87221e-30	up	yes
MSTRG.19091	Em0014g237a	Em0014g237a.t1	NA	NA	NA	NA		8.81588	9.15638	18.8132	0.466779	0.4892	0.306742	29.1319	4.86453	4.04982e-32	8.9015e-29	up	yes
MSTRG.14584	Em0009g951a;Em0009g930a;Em0009g891a;Em0009g913a;Em0009g869a;Em0009g952a	Em0009g951a.t1;Em0009g930a.t1;Em0009g891a.t1;Em0009g913a.t1;Em0009g869a.t1;Em0009g952a.t1	NA	NA	NA	NA	uncharacterized protein LOC106164359 [Lingula anatina]	42.8132	34.3874	40.8834	4.09524	6.81399	3.96675	7.9379	2.98876	4.70302e-29	8.45774e-26	up	yes
MSTRG.17609	Em0012g801a;Em0012g800a	Em0012g801a.t1;Em0012g800a.t1	GO:0005634(nucleus);GO:0048471(perinuclear region of cytoplasm);GO:0048471(perinuclear region of cytoplasm)	04611(Platelet activation);04926(Relaxin signaling pathway);04974(Protein digestion and absorption);04933(AGE-RAGE signaling pathway in diabetic complications);05146(Amoebiasis)	K19720	NA	PREDICTED: nmrA-like family domain-containing protein 1 [Amphimedon queenslandica]	42.72	43.8301	32.9979	5.83343	8.24185	7.56192	5.52511	2.466	8.32424e-29	1.37225e-25	up	yes
MSTRG.14633	Em0009g917a;Em0009g912a	Em0009g917a.t1;Em0009g912a.t1	NA	NA	NA	NA	uncharacterized protein LOC106164359 [Lingula anatina]	166.154	133.777	143.457	27.6178	33.9309	25.1485	5.11421	2.35451	1.75834e-27	2.67565e-24	up	yes
MSTRG.14121	Em0009g598a	Em0009g598a.t1	GO:0016740(transferase activity)	00590(Arachidonic acid metabolism);00480(Glutathione metabolism);00980(Metabolism of xenobiotics by cytochrome P450);00982(Drug metabolism - cytochrome P450)	K04097	EC:5.3.99.2;EC:2.5.1.18	PREDICTED: glutathione S-transferase 1-like [Amphimedon queenslandica]	121.377	116.861	76.5882	18.385	20.2131	20.8167	5.29878	2.40566	3.42853e-27	4.84451e-24	up	yes
MSTRG.27238	Em0022g90a;Em0022g91a;Em0022g108a;Em0022g97a	Em0022g90a.t1;Em0022g91a.t1;Em0022g108a.t1;Em0022g97a.t1	GO:0005776(autophagosome);GO:0006511(ubiquitin-dependent protein catabolic process);GO:0016235(aggresome);GO:0016239(positive regulation of macroautophagy);GO:0042802(identical protein binding);GO:0043130(ubiquitin binding);GO:0043130(ubiquitin binding)	04137(Mitophagy - animal);04137(Mitophagy - animal)	K14381	NA	predicted protein [Nematostella vectensis]	9.24746	7.66408	7.72676	2.03357	1.27435	1.27259	5.37894	2.42732	1.26139e-23	1.55956e-20	up	yes
Em0015g473a	Em0015g473a	Em0015g473a.t1	GO:0004000(adenosine deaminase activity);GO:0046085(adenosine metabolic process)	00230(Purine metabolism);05340(Primary immunodeficiency)	K01488	EC:3.5.4.4	PREDICTED: uncharacterized protein LOC100637415 [Amphimedon queenslandica]	0.052788	0	0	1.79502	1.71189	1.94359	0.00968498	-6.69003	5.80601e-23	6.75615e-20	down	yes
MSTRG.14664	Em0009g944a;Em0009g950a;Em0009g948a;Em0009g943a;Em0009g942a;Em0009g949a	Em0009g944a.t1;Em0009g950a.t1;Em0009g948a.t1;Em0009g943a.t1;Em0009g942a.t1;Em0009g949a.t1	GO:0005737(cytoplasm);GO:0006693(prostaglandin metabolic process);GO:0008270(zinc ion binding);GO:0032440(2-alkenal reductase [NAD(P)] activity);GO:0036132(13-prostaglandin reductase activity);GO:0047522(15-oxoprostaglandin 13-oxidase activity);GO:0055114(oxidation-reduction process);GO:0016491(oxidoreductase activity);GO:0070062(extracellular exosome);GO:0070062(extracellular exosome)	NA	NA	NA	leukotriene B4 [Geodia cydonium]	51.1976	52.2357	39.1852	8.41323	12.0589	11.762	4.42446	2.1455	8.37693e-23	9.20624e-20	up	yes
MSTRG.9194	Em0005g1116a	Em0005g1116a.t1	GO:0008150(biological_process)	00250(Alanine, aspartate and glutamate metabolism);00270(Cysteine and methionine metabolism);00280(Valine, leucine and isoleucine degradation);00350(Tyrosine metabolism);00360(Phenylalanine metabolism);00380(Tryptophan metabolism);00400(Phenylalanine, tyrosine and tryptophan biosynthesis)	K03334	EC:1.4.3.2	L-amino-acid oxidase-like isoform X1 [Orbicella faveolata]	3.18593	0.839347	3.96766	0.026298	0	0	303.937	8.24763	9.15623e-22	9.53308e-19	up	yes
MSTRG.16149	Em0011g422a	Em0011g422a.t1	GO:0003993(acid phosphatase activity);GO:0005764(lysosome);GO:0016311(dephosphorylation);GO:0016787(hydrolase activity);GO:0032496(response to lipopolysaccharide);GO:0032691(negative regulation of interleukin-1 beta production);GO:0032695(negative regulation of interleukin-12 production);GO:0032720(negative regulation of tumor necrosis factor production);GO:0032929(negative regulation of superoxi…	00740(Riboflavin metabolism);04142(Lysosome)	K14379	EC:3.1.3.2	PREDICTED: tartrate-resistant acid phosphatase type 5-like isoform X2 [Amphimedon queenslandica]	8.91718	8.96398	6.43834	1.12657	0.483274	0.726593	10.4088	3.37973	1.49697e-20	1.41014e-17	up	yes
MSTRG.20084	Em0015g317a	Em0015g317a.t1	GO:0004568(chitinase activity);GO:0005576(extracellular region);GO:0006032(chitin catabolic process);GO:0008061(chitin binding)	NA	NA	NA	uncharacterized protein LOC111327624 [Stylophora pistillata]	66.5191	33.4805	66.1212	12.331	9.81466	10.0248	5.16375	2.36842	5.206e-19	4.68114e-16	up	yes
MSTRG.11622	Em0007g736a	Em0007g736a.t1	NA	NA	NA	NA		2.06186	2.41942	7.40639	0	0	0	inf	inf	4.84514e-18	4.16724e-15	up	yes
MSTRG.27640	Em0022g468a;Em0022g467a	Em0022g468a.t1;Em0022g467a.t1	NA	NA	NA	NA		5.42034	3.35697	8.19504	0.883827	0.649353	0.961213	6.8042	2.76643	5.98922e-17	4.93662e-14	up	yes
Em0351g1a	Em0351g1a	Em0351g1a.t1	NA	NA	NA	NA		0	0	0	1.57681	1.45077	1.28582	-inf	-inf	4.80284e-16	3.80039e-13	down	yes
MSTRG.21548	Em0016g581a;Em0016g571a	Em0016g581a.t1;Em0016g571a.t1	NA	NA	NA	NA		5.1496	3.49513	6.45948	1.17509	0.766686	1.20169	4.80496	2.26452	1.84577e-15	1.30404e-12	up	yes
MSTRG.22033	Em0016g1114a	Em0016g1114a.t1	GO:0016491(oxidoreductase activity);GO:0016614(oxidoreductase activity, acting on CH-OH group of donors);GO:0045455(ecdysteroid metabolic process);GO:0050660(flavin adenine dinucleotide binding);GO:0055114(oxidation-reduction process)	NA	NA	NA	hypothetical protein TSAR_003168 [Trichomalopsis sarcophagae]	0	0	0	0.416347	0.52372	0.718793	-inf	-inf	2.98897e-15	2.03889e-12	down	yes
MSTRG.9891	Em0006g275a;Em0006g282a;Em0006g271a;Em0006g272a;Em0006g277a	Em0006g275a.t1;Em0006g282a.t1;Em0006g271a.t1;Em0006g272a.t1;Em0006g277a.t1	GO:0003824(catalytic activity);GO:0004497(monooxygenase activity);GO:0004500(dopamine beta-monooxygenase activity);GO:0005507(copper ion binding);GO:0005615(extracellular space);GO:0005783(endoplasmic reticulum);GO:0005789(endoplasmic reticulum membrane);GO:0006589(octopamine biosynthetic process);GO:0016020(membrane);GO:0016021(integral component of membrane);GO:0016491(oxidoreductase activity);…	00350(Tyrosine metabolism)	K00503	EC:1.14.17.1	PREDICTED: DBH-like monooxygenase protein 1 homolog [Amphimedon queenslandica]	20.9029	32.8574	24.2484	7.6421	7.33786	9.0068	3.25216	1.7014	4.11453e-15	2.71312e-12	up	yes
MSTRG.5891	Em0003g1362a	Em0003g1362a.t1	NA	NA	NA	NA		4.53823	11.2589	3.6498	0.578093	0.457633	0.442957	13.1515	3.71716	4.80686e-15	3.06739e-12	up	yes
MSTRG.32390	Em0657g5a	Em0657g5a.t1	GO:0000747(conjugation with cellular fusion);GO:0001302(replicative cell aging);GO:0005088(Ras guanyl-nucleotide exchange factor activity);GO:0005634(nucleus);GO:0005789(endoplasmic reticulum membrane);GO:0005829(cytosol);GO:0005886(plasma membrane);GO:0007089(traversing start control point of mitotic cell cycle);GO:0007163(establishment or maintenance of cell polarity);GO:0007265(Ras protein sig…	04010(MAPK signaling pathway)	K12326	NA	Ras-specific guanine nucleotide-releasing factor 1 [Exaiptasia pallida]	0	0	0	0.625208	0.697394	0.455212	-inf	-inf	3.86443e-14	2.31655e-11	down	yes
MSTRG.21407	Em0016g425a	Em0016g425a.t1	GO:0005634(nucleus)	NA	NA	NA	actin-related protein 6 [Cryptotermes secundus]	0	0	0	0.909431	1.10228	1.17046	-inf	-inf	7.09698e-14	4.01121e-11	down	yes
MSTRG.10316	Em0006g588a	Em0006g588a.t1	GO:0005391(sodium:potassium-exchanging ATPase activity);GO:0005887(integral component of plasma membrane);GO:0006883(cellular sodium ion homeostasis);GO:0015991(ATP hydrolysis coupled proton transport);GO:0030007(cellular potassium ion homeostasis);GO:0036376(sodium ion export across plasma membrane);GO:0043231(intracellular membrane-bounded organelle)	NA	NA	NA	PREDICTED: sodium/potassium-transporting ATPase subunit alpha-1-like isoform X2 [Amphimedon queenslandica]	4.21816	2.83533	5.06347	1.06014	0.776782	0.849156	4.51103	2.17346	2.05113e-13	1.09663e-10	up	yes
MSTRG.9195	Em0005g1117a	Em0005g1117a.t1	GO:0001716(L-amino-acid oxidase activity);GO:0003824(catalytic activity);GO:0005615(extracellular space);GO:0008115(sarcosine oxidase activity);GO:0008152(metabolic process);GO:0016020(membrane);GO:0016021(integral component of membrane);GO:0016491(oxidoreductase activity);GO:0050031(L-pipecolate oxidase activity);GO:0055114(oxidation-reduction process)	00260(Glycine, serine and threonine metabolism);00310(Lysine degradation);04146(Peroxisome)	K00306	EC:1.5.3.1;EC:1.5.3.7	PREDICTED: putative bifunctional amine oxidase DDB_G0291301 [Acropora digitifera]	1.99587	0.808011	2.58227	0.04996	0	0.068511	45.4639	5.50665	2.36208e-13	1.22965e-10	up	yes
MSTRG.24270	Em0019g324a	Em0019g324a.t1	GO:0004197(cysteine-type endopeptidase activity);GO:0005615(extracellular space);GO:0005764(lysosome);GO:0051603(proteolysis involved in cellular protein catabolic process)	04145(Phagosome);04142(Lysosome);04140(Autophagy - animal)	K01365	EC:3.4.22.15	cathepsin L [Lubomirskia baicalensis]	291.175	242.286	224.082	101.186	102.381	107.334	2.43661	1.28488	1.66461e-12	8.03153e-10	up	yes
MSTRG.24201	Em0019g235a	Em0019g235a.t1	GO:0005515(protein binding);GO:0005576(extracellular region);GO:0005764(lysosome);GO:0005783(endoplasmic reticulum);GO:0008203(cholesterol metabolic process);GO:0009615(response to virus);GO:0015485(cholesterol binding);GO:0015914(phospholipid transport);GO:0019747(regulation of isoprenoid metabolic process);GO:0019899(enzyme binding);GO:0030301(cholesterol transport);GO:0032366(intracellular ste…	04142(Lysosome)	K13443	NA	hypothetical protein BOX15_Mlig025232g1 [Macrostomum lignano]	32.3792	37.8198	31.7362	13.5276	10.6109	14.1944	2.65921	1.411	6.39856e-12	3.01372e-09	up	yes
MSTRG.32311	Em0597g2a	Em0597g2a.t1	GO:0005737(cytoplasm);GO:0030170(pyridoxal phosphate binding)	00260(Glycine, serine and threonine metabolism);00270(Cysteine and methionine metabolism);00290(Valine, leucine and isoleucine biosynthesis)	K17989	EC:4.3.1.17;EC:4.3.1.19	L-serine dehydratase/L-threonine deaminase-like [Pocillopora damicornis]	1.05342	0.851245	0.957186	0	0	0	inf	inf	1.04124e-11	4.79021e-09	up	yes
MSTRG.30413	Em0058g11a	Em0058g11a.t1	GO:0001894(tissue homeostasis);GO:0004032(alditol:NADP+ 1-oxidoreductase activity);GO:0004033(aldo-keto reductase (NADP) activity);GO:0005615(extracellular space);GO:0005654(nucleoplasm);GO:0005737(cytoplasm);GO:0005829(cytosol);GO:0005975(carbohydrate metabolic process);GO:0006061(sorbitol biosynthetic process);GO:0006700(C21-steroid hormone biosynthetic process);GO:0006950(response to stress);G…	00040(Pentose and glucuronate interconversions);00051(Fructose and mannose metabolism);00052(Galactose metabolism);00561(Glycerolipid metabolism);00790(Folate biosynthesis)	K00011	EC:1.1.1.21	PREDICTED: alcohol dehydrogenase [NADP(+)]-like [Amphimedon queenslandica]	17.434	11.9789	10.0493	3.77995	2.50884	4.94851	3.51171	1.81218	2.04943e-11	9.21406e-09	up	yes
MSTRG.6815	Em0004g158a	Em0004g158a.t1	GO:0001838(embryonic epithelial tube formation);GO:0004100(chitin synthase activity);GO:0005737(cytoplasm);GO:0006031(chitin biosynthetic process);GO:0006035(cuticle chitin biosynthetic process);GO:0006038(cell wall chitin biosynthetic process);GO:0007424(open tracheal system development);GO:0007430(terminal branching, open tracheal system);GO:0007443(Malpighian tubule morphogenesis);GO:0008362(c…	00520(Amino sugar and nucleotide sugar metabolism)	K00698	EC:2.4.1.16	PREDICTED: uncharacterized protein LOC100641628 [Amphimedon queenslandica]	15.1504	10.2975	17.26	5.27494	4.32123	5.81269	2.77165	1.47075	5.30191e-11	2.33072e-08	up	yes
MSTRG.9809	Em0006g7a	Em0006g7a.t1	NA	NA	NA	NA		0.501236	0.677474	0.530079	0	0	0	inf	inf	6.99095e-11	3.00641e-08	up	yes
MSTRG.12845	Em0008g392a	Em0008g392a.t1	NA	NA	NA	NA	PREDICTED: uncharacterized protein LOC109582688 [Amphimedon queenslandica]	0	0	0	0.587232	0.126305	0.657119	-inf	-inf	1.27077e-10	5.34859e-08	down	yes
MSTRG.31167	Em0141g2a;Em0141g4a	Em0141g2a.t1;Em0141g4a.t1	GO:0000166(nucleotide binding);GO:0005507(copper ion binding);GO:0016021(integral component of membrane);GO:0019829(cation-transporting ATPase activity);GO:0030001(metal ion transport);GO:0098655(cation transmembrane transport);GO:0004008(copper-exporting ATPase activity);GO:0005524(ATP binding);GO:0005770(late endosome);GO:0005802(trans-Golgi network);GO:0005887(integral component of plasma memb…	01524(Platinum drug resistance);01524(Platinum drug resistance)	K17686	EC:3.6.3.54	PREDICTED: copper-transporting ATPase 1-like [Amphimedon queenslandica]	17.1386	25.1068	28.4289	8.29817	9.10083	7.66833	2.81938	1.49538	1.7638e-10	7.26907e-08	up	yes
MSTRG.10458	Em0006g849a	Em0006g849a.t1	NA	NA	NA	NA	hypothetical protein CGI_10015724 [Crassostrea gigas]	0	0	0	0.894345	0.833753	1.17258	-inf	-inf	6.21014e-10	2.46347e-07	down	yes
MSTRG.31886	Em0388g6a	Em0388g6a.t1	NA	NA	NA	NA		4.31981	8.0604	6.96755	1.21676	1.68863	1.30702	4.59304	2.19945	7.98833e-10	3.09853e-07	up	yes
MSTRG.3819	Em0002g843a	Em0002g843a.t1	GO:0004175(endopeptidase activity);GO:0004930(G-protein coupled receptor activity);GO:0005886(plasma membrane);GO:0007165(signal transduction);GO:0007186(G-protein coupled receptor signaling pathway);GO:0016020(membrane);GO:0016021(integral component of membrane);GO:0030246(carbohydrate binding);GO:0097264(self proteolysis)	NA	NA	NA	PREDICTED: uncharacterized protein LOC105316852 [Amphimedon queenslandica]	6.60821	4.50432	4.79435	2.50456	1.63635	1.79169	2.68126	1.42291	8.48503e-10	3.2279e-07	up	yes
MSTRG.10988	Em0006g1398a	Em0006g1398a.t1	NA	NA	NA	NA	PREDICTED: uncharacterized protein LOC109581108 isoform X4 [Amphimedon queenslandica]	8.3794	6.54095	8.629	3.02553	2.52192	3.4653	2.61289	1.38565	1.00913e-09	3.76652e-07	up	yes
MSTRG.32465	Em0705g3a	Em0705g3a.t1	GO:0005524(ATP binding);GO:0005777(peroxisome);GO:0005789(endoplasmic reticulum membrane);GO:0009235(cobalamin metabolic process);GO:0016021(integral component of membrane);GO:0042626(ATPase activity, coupled to transmembrane movement of substances);GO:0055085(transmembrane transport)	02010(ABC transporters);04146(Peroxisome)	K05678	NA	PREDICTED: ATP-binding cassette sub-family D member 4-like isoform X1 [Amphimedon queenslandica]	0	0	0	0.480487	0.249885	0.454075	-inf	-inf	1.07584e-09	3.94115e-07	down	yes
MSTRG.17421	Em0012g670a	Em0012g670a.t1	GO:0016740(transferase activity)	00590(Arachidonic acid metabolism);00480(Glutathione metabolism);00980(Metabolism of xenobiotics by cytochrome P450);00982(Drug metabolism - cytochrome P450)	K04097	EC:5.3.99.2;EC:2.5.1.18	PREDICTED: glutathione S-transferase-like [Wasmannia auropunctata]	9.37075	14.522	6.79987	2.38382	2.20893	1.97621	4.67237	2.22415	1.82789e-09	6.57441e-07	up	yes
MSTRG.24997	Em0019g1204a	Em0019g1204a.t1	NA	NA	NA	NA		2.6305	1.0866	2.55285	0.185206	0.202463	0.209198	10.5048	3.39297	1.98544e-09	7.01357e-07	up	yes
MSTRG.23958	Em0018g1214a	Em0018g1214a.t1	GO:0005744(mitochondrial inner membrane presequence translocase complex);GO:0030150(protein import into mitochondrial matrix);GO:0032981(mitochondrial respiratory chain complex I assembly);GO:0033617(mitochondrial respiratory chain complex IV assembly)	NA	NA	NA	PREDICTED: mitochondrial import inner membrane translocase subunit Tim21-like [Amphimedon queenslandica]	21.6576	10.5312	25.8029	6.21544	2.62862	2.41385	5.1512	2.36491	2.52824e-09	8.77432e-07	up	yes
MSTRG.5571	Em0003g1029a;Em0003g1028a	Em0003g1029a.t1;Em0003g1028a.t1	NA	NA	NA	NA		1.89231	1.77521	0.622256	7.8896	7.25212	10.403	0.167932	-2.57405	2.98802e-09	1.00185e-06	down	yes
MSTRG.32189	Em0531g12a	Em0531g12a.t1	NA	NA	NA	NA		1.96606	3.26011	2.93084	0.150398	0.075978	0.462793	11.836	3.56511	3.2141e-09	1.05969e-06	up	yes
MSTRG.11547	Em0007g618a	Em0007g618a.t1	NA	NA	NA	NA		20.4312	24.3385	17.9485	46.3679	61.8244	62.9498	0.366468	-1.44824	3.45283e-09	1.11974e-06	down	yes
MSTRG.23944	Em0018g1206a	Em0018g1206a.t1	NA	NA	NA	NA		38.8784	16.0995	43.7097	9.54773	2.82105	4.73843	5.76878	2.52827	5.14702e-09	1.64223e-06	up	yes
MSTRG.2803	Em0001g3449a	Em0001g3449a.t1	GO:0006754(ATP biosynthetic process);GO:0006811(ion transport);GO:0015986(ATP synthesis coupled proton transport);GO:0045261(proton-transporting ATP synthase complex, catalytic core F(1));GO:0046933(proton-transporting ATP synthase activity, rotational mechanism)	00190(Oxidative phosphorylation)	K02136	NA	PREDICTED: ATP synthase subunit gamma, mitochondrial-like [Amphimedon queenslandica]	0	0	0	16.6981	20.1742	0	-inf	-inf	7.89803e-09	2.37768e-06	down	yes
MSTRG.31729	Em0302g5a	Em0302g5a.t1	NA	NA	NA	NA		4.56318	11.5315	8.24891	2.05078	1.73535	1.66717	4.464	2.15834	9.00265e-09	2.65807e-06	up	yes
MSTRG.17414	Em0012g663a	Em0012g663a.t1	GO:0016740(transferase activity)	00590(Arachidonic acid metabolism);00480(Glutathione metabolism);00980(Metabolism of xenobiotics by cytochrome P450);00982(Drug metabolism - cytochrome P450)	K04097	EC:5.3.99.2;EC:2.5.1.18	PREDICTED: glutathione S-transferase-like [Wasmannia auropunctata]	8.55921	12.8898	6.01591	2.06642	2.20101	1.86396	4.4794	2.16331	1.08099e-08	3.14472e-06	up	yes
MSTRG.13025	Em0008g621a	Em0008g621a.t1	GO:0016491(oxidoreductase activity);GO:0055114(oxidation-reduction process)	00040(Pentose and glucuronate interconversions);00051(Fructose and mannose metabolism);00052(Galactose metabolism);00561(Glycerolipid metabolism);00790(Folate biosynthesis)	K00011	EC:1.1.1.21	PREDICTED: alcohol dehydrogenase [NADP(+)]-like [Amphimedon queenslandica]	24.3643	16.7877	19.7639	5.01352	8.54021	8.22396	2.79717	1.48397	1.20158e-08	3.44487e-06	up	yes
MSTRG.29964	Em0034g6a;Em0034g4a;Em0034g3a	Em0034g6a.t1;Em0034g4a.t1;Em0034g3a.t1	GO:0004008(copper-exporting ATPase activity);GO:0005507(copper ion binding);GO:0005524(ATP binding);GO:0005770(late endosome);GO:0005802(trans-Golgi network);GO:0005887(integral component of plasma membrane);GO:0006878(cellular copper ion homeostasis);GO:0006882(cellular zinc ion homeostasis);GO:0007595(lactation);GO:0015677(copper ion import);GO:0015680(intracellular copper ion transport);GO:001…	01524(Platinum drug resistance);01524(Platinum drug resistance)	K17686	EC:3.6.3.54	PREDICTED: copper-transporting ATPase 1-like [Amphimedon queenslandica];PREDICTED: copper-transporting ATPase 2 [Ochotona princeps]	21.5343	31.1313	38.1542	12.1177	12.3624	12.3461	2.46618	1.30228	1.38094e-08	3.84757e-06	up	yes
MSTRG.8478	Em0005g150a;Em0005g181a	Em0005g150a.t1;Em0005g181a.t1	GO:0003674(molecular_function);GO:0005575(cellular_component);GO:0008150(biological_process);GO:0008150(biological_process)	NA	NA	NA	PREDICTED: leucine-rich repeat-containing protein 58-like [Amphimedon queenslandica]	14.6675	12.5714	9.32132	6.13457	4.1804	3.44013	2.65794	1.41031	1.4582e-08	4.00639e-06	up	yes
MSTRG.7509	Em0004g938a	Em0004g938a.t1	NA	NA	NA	NA		1.58736	0.825984	1.42914	0.141589	0.189003	0.395584	5.2914	2.40365	1.54164e-08	4.17763e-06	up	yes
MSTRG.24850	Em0019g987a	Em0019g987a.t1	GO:0005506(iron ion binding);GO:0006707(cholesterol catabolic process);GO:0006805(xenobiotic metabolic process);GO:0020037(heme binding);GO:0033781(cholesterol 24-hydroxylase activity);GO:0055114(oxidation-reduction process)	00120(Primary bile acid biosynthesis)	K07440	EC:1.14.14.25	cholesterol 24-hydroxylase-like [Pocillopora damicornis]	5.03052	4.92437	4.12602	2.30188	1.92408	2.29627	2.15891	1.11031	1.89676e-08	4.93707e-06	up	yes
MSTRG.32165	Em0519g3a	Em0519g3a.t1	NA	NA	NA	NA		0	0.178405	0.290126	3.28734	2.87957	7.0763	0.0353789	-4.82097	2.69873e-08	6.93329e-06	down	yes
MSTRG.23956	Em0018g1215a	Em0018g1215a.t1	NA	NA	NA	NA		36.7005	11.5999	34.8611	6.69977	1.11665	2.84637	7.79922	2.96333	2.96823e-08	7.52788e-06	up	yes
MSTRG.7155	Em0004g516a	Em0004g516a.t1	NA	NA	NA	NA		0.407132	1.05722	1.2763	0	0.040202	0	68.172	6.09111	3.69546e-08	9.25362e-06	up	yes
MSTRG.32806	Em1050g1a	Em1050g1a.t1	GO:0003777(microtubule motor activity);GO:0005524(ATP binding);GO:0007018(microtubule-based movement);GO:0016887(ATPase activity);GO:0030286(dynein complex)	NA	NA	NA	PREDICTED: dynein beta chain, ciliary-like [Amphimedon queenslandica]	0	1.50924	1.14685	0	0	0	inf	inf	5.47142e-08	1.31995e-05	up	yes
MSTRG.9947	Em0006g517a	Em0006g517a.t1	GO:0005789(endoplasmic reticulum membrane);GO:0016021(integral component of membrane);GO:0031648(protein destabilization)	00564(Glycerophospholipid metabolism);04142(Lysosome)	K06129	EC:3.1.1.5	transmembrane protein 147-like [Orbicella faveolata]	3.61162	1.68945	0	0	0	0	inf	inf	1.05071e-07	2.50424e-05	up	yes
MSTRG.27287	Em0022g143a;Em0022g144a	Em0022g143a.t1;Em0022g144a.t1	GO:0000166(nucleotide binding);GO:0004008(copper-exporting ATPase activity);GO:0005507(copper ion binding);GO:0005770(late endosome);GO:0005802(trans-Golgi network);GO:0005887(integral component of plasma membrane);GO:0006878(cellular copper ion homeostasis);GO:0016323(basolateral plasma membrane);GO:0030140(trans-Golgi network transport vesicle);GO:0032767(copper-dependent protein binding);GO:00…	01524(Platinum drug resistance);01524(Platinum drug resistance)	K17686	EC:3.6.3.54	PREDICTED: copper-transporting ATPase 1-like [Amphimedon queenslandica];copper-transporting ATPase 2 isoform X4 [Tupaia chinensis]	16.9857	27.4691	35.8626	9.15827	10.3048	11.8096	2.5683	1.36081	1.14862e-07	2.705e-05	up	yes
MSTRG.13336	Em0008g935a	Em0008g935a.t1	NA	NA	NA	NA		1.28197	1.15636	1.01733	0.035988	0.063427	0	34.76	5.11935	1.43339e-07	3.33592e-05	up	yes
MSTRG.20079	Em0015g315a	Em0015g315a.t1	GO:0004568(chitinase activity);GO:0005576(extracellular region);GO:0006032(chitin catabolic process);GO:0008061(chitin binding)	NA	NA	NA	uncharacterized protein LOC111327624 [Stylophora pistillata]	3.34284	2.07361	3.01602	0.802907	0.384354	0.543323	4.87261	2.2847	1.88306e-07	4.28168e-05	up	yes
MSTRG.14001	Em0009g339a	Em0009g339a.t1	NA	NA	NA	NA		0.317101	0.209842	0.223975	1.34536	2.0494	1.58248	0.15087	-2.72862	1.92085e-07	4.30388e-05	down	yes
MSTRG.13825	Em0009g163a	Em0009g163a.t1	NA	NA	NA	NA		4.06665	5.40886	4.35979	12.7886	12.2358	11.9697	0.373987	-1.41894	1.93633e-07	4.30388e-05	down	yes
MSTRG.11546	Em0007g617a	Em0007g617a.t1	NA	NA	NA	NA		25.917	30.2411	16.358	52.2557	72.2185	68.3426	0.376088	-1.41086	2.28668e-07	5.02612e-05	down	yes
MSTRG.25958	Em0020g913a	Em0020g913a.t1	NA	05202(Transcriptional misregulation in cancers)	K15621	NA	PREDICTED: protein unc-13 homolog D-like [Amphimedon queenslandica]	0	0	0.0932068	3.87883	0.330746	5.03416	0.0100832	-6.6319	2.99571e-07	6.5122e-05	down	yes
MSTRG.1682	Em0001g1999a	Em0001g1999a.t1	GO:0004842(ubiquitin-protein transferase activity);GO:0007165(signal transduction);GO:0007250(activation of NF-kappaB-inducing kinase activity);GO:0008270(zinc ion binding);GO:0016567(protein ubiquitination);GO:0042981(regulation of apoptotic process);GO:0046330(positive regulation of JNK cascade);GO:0046872(metal ion binding)	NA	NA	NA	PREDICTED: TNF receptor-associated factor 4-like [Amphimedon queenslandica]	0.33754	0.302411	0.0779365	1.11474	1.61307	2.32294	0.142135	-2.81467	3.99213e-07	8.58394e-05	down	yes
MSTRG.26813	Em0021g742a;Em0021g731a	Em0021g742a.t1;Em0021g731a.t1	GO:0004497(monooxygenase activity);GO:0005506(iron ion binding);GO:0005783(endoplasmic reticulum);GO:0006725(cellular aromatic compound metabolic process);GO:0008144(drug binding);GO:0015643(toxic substance binding);GO:0016020(membrane);GO:0016491(oxidoreductase activity);GO:0016705(oxidoreductase activity, acting on paired donors, with incorporation or reduction of molecular oxygen);GO:0018585(f…	NA	NA	NA	PREDICTED: cytochrome P450 4F1-like [Amphimedon queenslandica]	4.56932	4.52744	5.20883	1.93521	1.93498	2.52438	2.23715	1.16166	4.24148e-07	9.02203e-05	up	yes
MSTRG.6392	Em0003g1549a	Em0003g1549a.t1	GO:0005515(protein binding);GO:0005829(cytosol);GO:0007165(signal transduction);GO:0034605(cellular response to heat);GO:0035556(intracellular signal transduction);GO:0046872(metal ion binding)	05100(Bacterial invasion of epithelial cells)	K13738	NA	uncharacterized protein LOC110981268 [Acanthaster planci]	1.01017	0.950331	0.801697	2.54563	2.72315	3.15458	0.327922	-1.60858	4.55167e-07	9.57883e-05	down	yes
MSTRG.7789	Em0004g1132a;Em0004g1150a	Em0004g1132a.t1;Em0004g1150a.t1	NA	NA	NA	NA		34.9009	28.6863	45.2669	91.9921	95.0115	76.3079	0.413404	-1.27438	5.15113e-07	0.000106361	down	yes
MSTRG.6889	Em0004g162a	Em0004g162a.t1	GO:0005887(integral component of plasma membrane);GO:0008523(sodium-dependent multivitamin transmembrane transporter activity);GO:0015878(biotin transport);GO:0015887(pantothenate transmembrane transport)	00520(Amino sugar and nucleotide sugar metabolism)	K00698	EC:2.4.1.16	chitin synthase 3, partial [Lubomirskia baicalensis]	3.09512	1.98958	3.23743	0.955988	0.905685	0.746745	3.19049	1.67378	5.21538e-07	0.000106361	up	yes
MSTRG.18090	Em0013g241a	Em0013g241a.t1	GO:0005515(protein binding);GO:0016491(oxidoreductase activity);GO:0055114(oxidation-reduction process)	NA	NA	NA	PREDICTED: pyridine nucleotide-disulfide oxidoreductase domain-containing protein 2-like [Amphimedon queenslandica]	0.0888855	2.11507	1.53004	0	0	0	inf	inf	5.55962e-07	0.000111813	up	yes
MSTRG.25669	Em0020g430a	Em0020g430a.t1	NA	NA	NA	NA		2.00209	1.14516	1.75964	5.58592	4.66003	5.78005	0.306183	-1.70753	5.59572e-07	0.000111813	down	yes
MSTRG.32017	Em0440g5a	Em0440g5a.t1	GO:0005783(endoplasmic reticulum);GO:0006631(fatty acid metabolic process);GO:0080132(fatty acid alpha-hydroxylase activity)	NA	NA	NA	Fatty acid 2-hydroxylase [Trichoplax sp. H2]	0	0	0	0	2.20724	2.97697	-inf	-inf	5.92328e-07	0.000116014	down	yes
Em0010g234a	Em0010g234a	Em0010g234a.t1	NA	NA	NA	NA	ATP synthase F0 subunit 6 (mitochondrion) [Ephydatia muelleri]	0	0	0	0	2.24395	2.19615	-inf	-inf	6.48565e-07	0.000125783	down	yes
Em0005g1589a	Em0005g1589a	Em0005g1589a.t1	NA	NA	NA	NA		2.7223	2.21818	0	0	0	0	inf	inf	1.62762e-06	0.000298126	up	yes
MSTRG.30310	Em0052g5a	Em0052g5a.t1	GO:0005977(glycogen metabolic process);GO:0019888(protein phosphatase regulator activity);GO:0050790(regulation of catalytic activity)	NA	NA	NA	protein phosphatase 1 regulatory subunit 3B-B-like [Orbicella faveolata]	3.66982	4.39869	2.28578	0.559579	0.601713	0.934804	4.9398	2.30445	2.02124e-06	0.000366828	up	yes
Em0971g1a	Em0971g1a	Em0971g1a.t1	NA	NA	NA	NA		0.795785	0.429503	0	0	0	0	inf	inf	2.0963e-06	0.000376991	up	yes
MSTRG.21026	Em0015g1306a	Em0015g1306a.t1	GO:0003725(double-stranded RNA binding)	04621(NOD-like receptor signaling pathway);05162(Measles);05164(Influenza A);05160(Hepatitis C);05168(Herpes simplex infection)	K14216	EC:2.7.7.84	OAS1A [Cricetulus griseus]	0.0747681	0.176194	0.165253	0.280757	1.19081	1.37017	0.146465	-2.77137	2.14306e-06	0.000381928	down	yes
MSTRG.27249	Em0022g102a;Em0022g100a	Em0022g102a.t1;Em0022g100a.t1	GO:0003676(nucleic acid binding);GO:0005575(cellular_component);GO:0015074(DNA integration);GO:0005776(autophagosome);GO:0006511(ubiquitin-dependent protein catabolic process);GO:0016235(aggresome);GO:0016239(positive regulation of macroautophagy);GO:0042802(identical protein binding);GO:0043130(ubiquitin binding)	04672(Intestinal immune network for IgA production);04137(Mitophagy - animal);04217(Necroptosis);04218(Cellular senescence)	K13073;K14381	NA	uncharacterized protein LOC106097043 [Oreochromis niloticus];sequestosome-1 isoform X3 [Gallus gallus]	1.30905	1.03798	1.2543	0.221922	0.328351	0.32905	4.09557	2.03406	2.18516e-06	0.000385954	up	yes
MSTRG.13022	Em0008g618a;Em0008g622a	Em0008g618a.t1;Em0008g622a.t1	NA	NA	NA	NA	PREDICTED: uncharacterized protein LOC109591238 [Amphimedon queenslandica]	0	0.0214893	0	0.299828	0.198781	0.301382	0.0268619	-5.21829	2.20528e-06	0.00038606	down	yes
MSTRG.7198	Em0004g491a	Em0004g491a.t1	NA	NA	NA	NA		1.46592	1.39885	2.37374	0.467954	0.253945	0.328016	4.98947	2.31889	2.35666e-06	0.000408942	up	yes
MSTRG.15244	Em0010g502a	Em0010g502a.t1	GO:0004536(deoxyribonuclease activity);GO:0006308(DNA catabolic process)	NA	NA	NA	Transposon Tf2-6 polyprotein [Trichinella pseudospiralis]	0.505553	0.381356	0.482781	0.081885	0.048498	0.060364	7.18066	2.84412	2.68234e-06	0.00046141	up	yes
MSTRG.10597	Em0006g905a	Em0006g905a.t1	GO:0005525(GTP binding)	NA	NA	NA	PREDICTED: uncharacterized protein LOC105315658 [Amphimedon queenslandica]	5.89364	3.99562	3.33693	10.6442	9.18364	11.6966	0.419553	-1.25308	2.81104e-06	0.00047938	down	yes
MSTRG.23208	Em0018g539a	Em0018g539a.t1	GO:0005977(glycogen metabolic process);GO:0019888(protein phosphatase regulator activity);GO:0050790(regulation of catalytic activity)	NA	NA	NA	protein phosphatase 1 regulatory subunit 3B-B-like [Orbicella faveolata]	2.56412	3.05381	1.68193	0.450789	0.425731	0.64048	4.81203	2.26665	3.19996e-06	0.000541039	up	yes
MSTRG.22699	Em0017g780a	Em0017g780a.t1	GO:0004252(serine-type endopeptidase activity);GO:0005044(scavenger receptor activity);GO:0006508(proteolysis);GO:0006898(receptor-mediated endocytosis);GO:0016020(membrane)	NA	NA	NA	PREDICTED: uncharacterized protein LOC109586260 [Amphimedon queenslandica]	0.931174	0.949663	0.677782	2.60532	2.75599	2.47898	0.326342	-1.61554	3.26071e-06	0.000546639	down	yes
MSTRG.6482	Em0003g1630a	Em0003g1630a.t1	GO:0004536(deoxyribonuclease activity);GO:0006308(DNA catabolic process)	04621(NOD-like receptor signaling pathway)	K04612	NA	Retrovirus-related Pol polyprotein from transposon 412, partial [Stegodyphus mimosarum]	1.04429	1.37879	2.05875	0.496374	0.392924	0.372555	3.55178	1.82854	3.33523e-06	0.000549813	up	yes
MSTRG.18891	Em0014g6a	Em0014g6a.t1	NA	NA	NA	NA	PREDICTED: zinc finger protein 350-like [Amphimedon queenslandica]	0	0	0	1.14252	0.807714	0	-inf	-inf	3.77219e-06	0.000611651	down	yes
MSTRG.2151	Em0001g2667a	Em0001g2667a.t1	NA	NA	NA	NA		4.69691	3.9092	3.101	1.75015	1.13132	1.36428	2.75737	1.4633	4.11334e-06	0.00065621	up	yes
MSTRG.32102	Em0494g2a	Em0494g2a.t1	GO:0004252(serine-type endopeptidase activity);GO:0005044(scavenger receptor activity);GO:0006508(proteolysis);GO:0006898(receptor-mediated endocytosis);GO:0016020(membrane)	NA	NA	NA	PREDICTED: deleted in malignant brain tumors 1 protein-like isoform X7 [Amphimedon queenslandica]	1.21416	1.65573	0	0	0	0	inf	inf	4.48562e-06	0.000709877	up	yes
MSTRG.28233	Em0023g99a	Em0023g99a.t1	GO:0005768(endosome);GO:0005774(vacuolar membrane);GO:0005802(trans-Golgi network);GO:0008757(S-adenosylmethionine-dependent methyltransferase activity);GO:0032259(methylation)	00100(Steroid biosynthesis)	K00559	EC:2.1.1.41	PREDICTED: cycloartenol-C-24-methyltransferase 1-like [Amphimedon queenslandica]	1.484	9.36385	3.59321	1.03412	0.408327	0.216948	8.70257	3.12144	4.57569e-06	0.000718384	up	yes
MSTRG.21549	Em0016g572a	Em0016g572a.t1	NA	NA	NA	NA		4.20194	2.10294	4.92528	1.46103	0.61943	0.768221	3.94223	1.97901	4.92521e-06	0.000767169	up	yes
MSTRG.16873	Em0012g191a	Em0012g191a.t1	NA	NA	NA	NA	uncharacterized protein LOC110980822 [Acanthaster planci]	0	0	0	0	1.3614	1.89764	-inf	-inf	5.19029e-06	0.000795924	down	yes
Em0001g1610a	Em0001g1610a	Em0001g1610a.t1	GO:0000151(ubiquitin ligase complex);GO:0000209(protein polyubiquitination);GO:0005737(cytoplasm);GO:0031624(ubiquitin conjugating enzyme binding);GO:0032436(positive regulation of proteasomal ubiquitin-dependent protein catabolic process);GO:0061630(ubiquitin protein ligase activity)	NA	NA	NA	PREDICTED: E3 ubiquitin-protein ligase RNF19B-like [Amphimedon queenslandica]	0	0	0	0.683301	0.460609	0	-inf	-inf	5.91675e-06	0.000893474	down	yes
Em1275g1a	Em1275g1a	Em1275g1a.t1	GO:0007286(spermatid development);GO:0030719(P granule organization);GO:0033391(chromatoid body);GO:0043046(DNA methylation involved in gamete generation);GO:0071546(pi-body)	NA	NA	NA	PREDICTED: uncharacterized protein LOC109580637 [Amphimedon queenslandica]	0.763292	0.386478	0	0	0	0	inf	inf	6.11331e-06	0.000909275	up	yes
MSTRG.32506	Em0733g1a	Em0733g1a.t1	NA	NA	NA	NA	PREDICTED: kielin/chordin-like protein isoform X1 [Amphimedon queenslandica]	14.8125	12.8767	16.3168	37.6741	36.8589	24.0609	0.446336	-1.1638	6.38197e-06	0.00094215	down	yes
MSTRG.15976	Em0011g125a	Em0011g125a.t1	GO:0005737(cytoplasm);GO:0005764(lysosome);GO:0006629(lipid metabolic process);GO:0008134(transcription factor binding);GO:0016787(hydrolase activity);GO:0016810(hydrolase activity, acting on carbon-nitrogen (but not peptide) bonds)	NA	NA	NA	N-acylethanolamine acid amidase L homeolog precursor [Xenopus laevis]	0	0	0	0	3.05956	2.02986	-inf	-inf	6.75575e-06	0.000989942	down	yes
MSTRG.27626	Em0022g491a	Em0022g491a.t1	NA	NA	NA	NA		5.36864	3.71687	11.0518	2.44282	1.15657	1.48748	3.95869	1.98502	8.25581e-06	0.00119209	up	yes
MSTRG.1264	Em0001g1488a	Em0001g1488a.t1	NA	NA	NA	NA	PREDICTED: uncharacterized protein LOC109580712 [Amphimedon queenslandica]	16.2749	9.27008	16.9872	8.2279	4.15225	6.25773	2.28203	1.19032	8.59707e-06	0.00122351	up	yes
MSTRG.21713	Em0016g787a	Em0016g787a.t1	GO:0003674(molecular_function)	NA	NA	NA	hypothetical protein HELRODRAFT_193870 [Helobdella robusta]	25.5195	27.7984	43.0783	16.0812	14.9189	8.63684	2.43198	1.28213	8.70813e-06	0.00123046	up	yes
MSTRG.28419	Em0023g377a	Em0023g377a.t1	NA	NA	NA	NA		11.3365	11.3114	10.2374	7439.44	11.4664	11.2266	0.00440696	-7.826	9.8464e-06	0.00138143	down	yes
MSTRG.518	Em0001g618a;Em0001g616a	Em0001g618a.t1;Em0001g616a.t1	NA	NA	NA	NA	PREDICTED: uncharacterized protein LOC109585579 [Amphimedon queenslandica]	1.58307	1.05788	1.52054	3.07309	3.24379	4.3067	0.391721	-1.3521	1.01959e-05	0.00141577	down	yes
MSTRG.7305	Em0004g584a	Em0004g584a.t1	NA	NA	NA	NA		0.018731	2.06315	2.62304	0	0.037381	0.019381	82.8886	6.3731	1.02343e-05	0.00141577	up	yes
MSTRG.6266	Em0002g312a	Em0002g312a.t1	GO:0005634(nucleus);GO:0005737(cytoplasm);GO:0019005(SCF ubiquitin ligase complex);GO:0030162(regulation of proteolysis);GO:0031625(ubiquitin protein ligase binding);GO:0043161(proteasome-mediated ubiquitin-dependent protein catabolic process)	NA	NA	NA	PREDICTED: speckle-type POZ protein B-like [Rhagoletis zephyria]	3.30848	2.58566	2.4183	5.90716	7.54957	9.1731	0.367322	-1.44488	1.32255e-05	0.00174399	down	yes
Em0015g587a	Em0015g587a	Em0015g587a.t1	NA	NA	NA	NA	PREDICTED: uncharacterized protein LOC109586389 [Amphimedon queenslandica]	0.479979	0	0.667032	0	0	0	inf	inf	1.32831e-05	0.00174399	up	yes
Em0001g3093a	Em0001g3093a	Em0001g3093a.t1	GO:0000981(RNA polymerase II transcription factor activity, sequence-specific DNA binding);GO:0005634(nucleus)	NA	NA	NA	PREDICTED: uncharacterized protein LOC105313269 [Amphimedon queenslandica]	0.006518	0.065458	0.112332	0.957357	0.703345	0.71474	0.0775889	-3.68801	1.33122e-05	0.00174399	down	yes
MSTRG.15074	Em0010g209a	Em0010g209a.t1	GO:0007160(cell-matrix adhesion);GO:0016021(integral component of membrane)	NA	NA	NA	PREDICTED: mucin-like protein [Amphimedon queenslandica]	0.140159	0.219389	0.019341	0.622369	0.814002	1.27761	0.139606	-2.84057	1.38189e-05	0.00179845	down	yes
MSTRG.32319	Em0598g9a	Em0598g9a.t1	GO:0005575(cellular_component);GO:0006470(protein dephosphorylation);GO:0008138(protein tyrosine/serine/threonine phosphatase activity);GO:0016311(dephosphorylation)	NA	NA	NA	PREDICTED: serine/threonine/tyrosine-interacting-like protein 1 [Amphimedon queenslandica]	0	0	0	0	1.66017	1.78849	-inf	-inf	1.39994e-05	0.00181005	down	yes
MSTRG.22484	Em0017g409a	Em0017g409a.t1	GO:0004536(deoxyribonuclease activity);GO:0006308(DNA catabolic process)	03040(Spliceosome);04141(Protein processing in endoplasmic reticulum);04010(MAPK signaling pathway);04144(Endocytosis)	K03283	NA	Transposon Ty3-G Gag-Pol polyprotein, partial [Trichinella nelsoni]	0.738607	0.735947	0	0	0	0	inf	inf	1.52398e-05	0.00194812	up	yes
MSTRG.30133	Em0041g8a	Em0041g8a.t1	NA	NA	NA	NA		0.648443	0.628149	0.992644	3.777	2.30821	2.72025	0.257708	-1.95619	1.52643e-05	0.00194812	down	yes
MSTRG.16856	Em0012g166a	Em0012g166a.t1	NA	NA	NA	NA		0	0	0	0	2.23109	3.64614	-inf	-inf	1.58588e-05	0.00201102	down	yes
MSTRG.8794	Em0005g672a	Em0005g672a.t1	GO:0000900(translation repressor activity, mRNA regulatory element binding);GO:0003730(mRNA 3'-UTR binding);GO:0005634(nucleus);GO:0005737(cytoplasm);GO:0008135(translation factor activity, RNA binding);GO:0043005(neuron projection);GO:0043022(ribosome binding);GO:0045202(synapse);GO:1990124(messenger ribonucleoprotein complex);GO:2000766(negative regulation of cytoplasmic translation)	NA	NA	NA	PREDICTED: uncharacterized protein LOC102802303 [Saccoglossus kowalevskii]	0.504504	0.352112	0.505353	0.076993	0.134858	0.022753	5.8054	2.53739	1.66615e-05	0.00209935	up	yes
MSTRG.32131	Em0508g2a	Em0508g2a.t1	GO:0003723(RNA binding);GO:0005575(cellular_component);GO:0008150(biological_process)	NA	NA	NA	PREDICTED: nucleolar protein 9-like [Acropora digitifera]	0	0	0	0	1.6106	1.33298	-inf	-inf	1.88183e-05	0.00232664	down	yes
MSTRG.21715	Em0016g788a	Em0016g788a.t1	GO:0003674(molecular_function)	03320(PPAR signaling pathway)	K08770	NA	PREDICTED: polyubiquitin-C isoform X1 [Monodelphis domestica]	10.2309	9.69738	21.6852	4.45619	4.76844	1.78752	3.77888	1.91796	1.96611e-05	0.00241575	up	yes
MSTRG.23455	Em0018g711a	Em0018g711a.t1	GO:0005509(calcium ion binding);GO:0005525(GTP binding);GO:0005622(intracellular);GO:0007264(small GTPase mediated signal transduction)	NA	NA	NA	PREDICTED: ras and EF-hand domain-containing protein-like isoform X1 [Callorhinchus milii]	11.0688	7.27996	8.45711	3.93008	3.09506	3.80267	2.47565	1.30781	1.99092e-05	0.00243113	up	yes
MSTRG.27257	Em0022g109a	Em0022g109a.t1	GO:0005776(autophagosome);GO:0006511(ubiquitin-dependent protein catabolic process);GO:0016235(aggresome);GO:0016239(positive regulation of macroautophagy);GO:0042802(identical protein binding);GO:0043130(ubiquitin binding)	04137(Mitophagy - animal)	K14381	NA	predicted protein [Nematostella vectensis]	4.44307	1.60523	4.25352	1.11237	0.790186	0.40479	4.46479	2.15859	2.07826e-05	0.00252221	up	yes
Em0074g15a	Em0074g15a	Em0074g15a.t1	NA	NA	NA	NA		0	0	0	0.619028	0	0.337523	-inf	-inf	2.2764e-05	0.00272919	down	yes
MSTRG.18982	Em0014g146a	Em0014g146a.t1	NA	NA	NA	NA		2.91092	4.69586	7.41344	1.28081	1.10289	0.357147	5.48014	2.45421	2.30686e-05	0.00274905	up	yes
MSTRG.14099	Em0009g436a	Em0009g436a.t1	GO:0005634(nucleus);GO:0006301(postreplication repair);GO:0006513(protein monoubiquitination);GO:0009411(response to UV);GO:0043142(single-stranded DNA-dependent ATPase activity);GO:0061630(ubiquitin protein ligase activity);GO:0097505(Rad6-Rad18 complex)	NA	NA	NA	PREDICTED: crt homolog 3-like [Amphimedon queenslandica]	4.89231	4.97158	3.03619	1.29797	0.581271	1.91843	3.39684	1.76419	2.46208e-05	0.00291391	up	yes
MSTRG.6008	Em0003g1334a	Em0003g1334a.t1	GO:0000166(nucleotide binding);GO:0004672(protein kinase activity);GO:0004674(protein serine/threonine kinase activity);GO:0005524(ATP binding);GO:0005575(cellular_component);GO:0005737(cytoplasm);GO:0006468(protein phosphorylation);GO:0016301(kinase activity);GO:0016310(phosphorylation);GO:0016740(transferase activity);GO:0035556(intracellular signal transduction)	NA	NA	NA	PREDICTED: serine/threonine-protein kinase 10-like [Amphimedon queenslandica]	8.61668	3.78217	6.85375	2.9087	2.64498	2.53065	2.38147	1.25185	2.49379e-05	0.00291906	up	yes
MSTRG.20114	Em0015g344a	Em0015g344a.t1	GO:0005525(GTP binding);GO:0005813(centrosome);GO:0005929(cilium);GO:0007264(small GTPase mediated signal transduction);GO:0030992(intraciliary transport particle B)	NA	NA	NA	predicted protein [Nematostella vectensis]	0	1.46291	1.15589	0	0	0	inf	inf	2.61678e-05	0.003045	up	yes
MSTRG.26879	Em0021g752a	Em0021g752a.t1	GO:0003674(molecular_function);GO:0005886(plasma membrane);GO:0016020(membrane);GO:0016021(integral component of membrane);GO:0050773(regulation of dendrite development)	NA	NA	NA	PREDICTED: sushi, von Willebrand factor type A, EGF and pentraxin domain-containing protein 1-like isoform X3 [Amphimedon queenslandica]	2.29936	0.473416	0	12.0478	15.7397	18.7207	0.0596192	-4.06808	2.74582e-05	0.00317648	down	yes
MSTRG.24630	Em0019g715a	Em0019g715a.t1	NA	NA	NA	NA		0	0	0	1.07841	0.774022	0	-inf	-inf	2.97478e-05	0.00342134	down	yes
Em0016g631a	Em0016g631a	Em0016g631a.t1	NA	NA	NA	NA		0	0	0	0.715828	0	0.517387	-inf	-inf	3.26404e-05	0.00368967	down	yes
MSTRG.32689	Em0876g2a	Em0876g2a.t1	NA	NA	NA	NA		0	0	0	0	0.363848	0.294993	-inf	-inf	3.80894e-05	0.00425697	down	yes
MSTRG.16230	Em0011g488a	Em0011g488a.t1	GO:0000287(magnesium ion binding);GO:0004674(protein serine/threonine kinase activity);GO:0005524(ATP binding);GO:0005634(nucleus);GO:0005737(cytoplasm);GO:0006468(protein phosphorylation);GO:0035556(intracellular signal transduction)	NA	NA	NA	serine/threonine-protein kinase NIM1 [Otolemur garnettii]	0	0	0	0.874738	0	1.00749	-inf	-inf	4.04139e-05	0.00447678	down	yes
MSTRG.6066	Em0003g1492a	Em0003g1492a.t1	NA	NA	NA	NA		9.30603	16.8757	10.4442	22.3356	42.6375	31.2387	0.38068	-1.39335	4.05088e-05	0.00447678	down	yes
MSTRG.20768	Em0015g1066a	Em0015g1066a.t1	GO:0003700(DNA binding transcription factor activity);GO:0005634(nucleus);GO:0006355(regulation of transcription, DNA-templated);GO:0008270(zinc ion binding)	03040(Spliceosome)	K12874	NA	PREDICTED: NFX1-type zinc finger-containing protein 1-like [Amphimedon queenslandica]	0.19816	0.203896	0.083853	0.754677	0.456063	0.694199	0.255079	-1.97099	4.1782e-05	0.00459184	down	yes
MSTRG.28217	Em0023g84a	Em0023g84a.t1	GO:0000122(negative regulation of transcription by RNA polymerase II);GO:0000978(RNA polymerase II proximal promoter sequence-specific DNA binding);GO:0001525(angiogenesis);GO:0003677(DNA binding);GO:0003700(DNA binding transcription factor activity);GO:0005515(protein binding);GO:0005634(nucleus);GO:0005654(nucleoplasm);GO:0005794(Golgi apparatus);GO:0006357(regulation of transcription by RNA po…	NA	NA	NA	PREDICTED: Krueppel-like factor 10 [Amphimedon queenslandica]	12.5473	10.4592	12.0041	4.15266	6.05809	7.01441	2.03253	1.02328	4.48055e-05	0.00489692	up	yes
MSTRG.23963	Em0018g1207a	Em0018g1207a.t1	GO:0005744(mitochondrial inner membrane presequence translocase complex);GO:0030150(protein import into mitochondrial matrix);GO:0032981(mitochondrial respiratory chain complex I assembly);GO:0033617(mitochondrial respiratory chain complex IV assembly)	NA	NA	NA	PREDICTED: mitochondrial import inner membrane translocase subunit Tim21-like [Amphimedon queenslandica]	19.2188	3.4189	19.6204	5.03663	2.62879	1.83048	4.45013	2.15385	4.685e-05	0.00509224	up	yes
MSTRG.1854	Em0001g2255a	Em0001g2255a.t1	NA	NA	NA	NA		3.62809	1.11441	1.92635	0.825892	0.420842	0.293108	4.33087	2.11466	4.79404e-05	0.00518228	up	yes
MSTRG.13343	Em0008g943a	Em0008g943a.t1	GO:0005044(scavenger receptor activity);GO:0006898(receptor-mediated endocytosis);GO:0016020(membrane)	NA	NA	NA	bone morphogenetic protein [Daphnia pulex]	8.66684	5.99269	13.9954	4.33094	3.34901	4.95181	2.26849	1.18173	5.32277e-05	0.00572255	up	yes
MSTRG.9103	Em0005g1017a	Em0005g1017a.t1	GO:0000287(magnesium ion binding);GO:0004364(glutathione transferase activity);GO:0004667(prostaglandin-D synthase activity);GO:0005509(calcium ion binding);GO:0005515(protein binding);GO:0005737(cytoplasm);GO:0005829(cytosol);GO:0006693(prostaglandin metabolic process);GO:0007165(signal transduction);GO:0007626(locomotory behavior);GO:0019371(cyclooxygenase pathway);GO:0042803(protein homodimeri…	00590(Arachidonic acid metabolism);00480(Glutathione metabolism);00980(Metabolism of xenobiotics by cytochrome P450);00982(Drug metabolism - cytochrome P450)	K04097	EC:5.3.99.2;EC:2.5.1.18	glutathione S-transferase [Halyomorpha halys]	5.10673	2.98893	3.23018	8.25793	9.60727	13.2416	0.364095	-1.45761	6.2272e-05	0.00665873	down	yes
MSTRG.22358	Em0017g333a	Em0017g333a.t1	GO:0004536(deoxyribonuclease activity);GO:0006308(DNA catabolic process)	04621(NOD-like receptor signaling pathway)	K04612	NA	Transposon Ty3-G Gag-Pol polyprotein [Trichinella papuae]	1.76311	0.675792	1.27989	0.506494	0.274792	0.417692	3.10163	1.63303	6.56093e-05	0.00694055	up	yes
MSTRG.8988	Em0005g777a	Em0005g777a.t1	NA	NA	NA	NA		0.549164	0.795669	0.735926	0.073277	0.125093	0.080139	7.47107	2.90131	7.29744e-05	0.00763799	up	yes
MSTRG.12295	Em0007g1432a	Em0007g1432a.t1	GO:0005783(endoplasmic reticulum);GO:0007040(lysosome organization);GO:0016020(membrane);GO:0016021(integral component of membrane)	NA	NA	NA	PREDICTED: ceroid-lipofuscinosis neuronal protein 6 homolog isoform X1 [Cyprinus carpio]	0.0416196	0.0430952	0	2.3175	0	2.27028	0.0184653	-5.75904	9.70931e-05	0.0099005	down	yes
MSTRG.29027	Em0023g958a	Em0023g958a.t1	GO:0004536(deoxyribonuclease activity);GO:0006308(DNA catabolic process)	04621(NOD-like receptor signaling pathway)	K04612	NA	Transposon Ty3-G Gag-Pol polyprotein [Trichinella papuae]	0.281861	0.092683	0.084922	0.562758	0.743393	0.787701	0.219436	-2.18813	0.000101427	0.0102369	down	yes
MSTRG.30292	Em0051g3a	Em0051g3a.t1	NA	NA	NA	NA	PREDICTED: uncharacterized protein LOC109581431 [Amphimedon queenslandica]	0.065542	0.02335	0	0.433474	0.237292	0.39591	0.0833355	-3.58492	0.000102485	0.0102911	down	yes
MSTRG.32549	Em0762g2a	Em0762g2a.t1	GO:0005515(protein binding);GO:0016021(integral component of membrane)	NA	NA	NA	PREDICTED: transmembrane and TPR repeat-containing protein 3-like [Amphimedon queenslandica]	0	0.138024	0	0.407159	0.978784	1.13767	0.054693	-4.1925	0.000104338	0.0104243	down	yes
MSTRG.23721	Em0018g968a	Em0018g968a.t1	GO:0003674(molecular_function);GO:0005764(lysosome);GO:0005770(late endosome);GO:0008150(biological_process);GO:0016020(membrane);GO:0016021(integral component of membrane)	NA	NA	NA	PREDICTED: mucolipin-3-like [Amphimedon queenslandica]	0.795103	0.830936	0.322347	1.76843	2.1776	1.82327	0.337716	-1.56612	0.000106846	0.0106213	down	yes
MSTRG.30795	Em0092g15a	Em0092g15a.t1	NA	NA	NA	NA		0.128895	0	0.060979	0.835771	0.876272	0.495927	0.0859948	-3.53961	0.000161768	0.0155344	down	yes
MSTRG.13321	Em0008g927a	Em0008g927a.t1	NA	NA	NA	NA		30.2936	30.8073	16.8612	54.6852	42.2744	61.5269	0.491917	-1.02351	0.00017967	0.0171702	down	yes
MSTRG.4193	Em0002g1124a	Em0002g1124a.t1	GO:0000977(RNA polymerase II regulatory region sequence-specific DNA binding);GO:0003700(DNA binding transcription factor activity);GO:0005634(nucleus);GO:0006357(regulation of transcription by RNA polymerase II)	NA	NA	NA	zinc finger BED domain-containing protein 1-like [Astatotilapia calliptera]	0.509427	0.407927	1.02651	0.139034	0.202016	0.0823269	4.59134	2.19891	0.000182153	0.0172912	up	yes
MSTRG.30702	Em0083g1a	Em0083g1a.t1	GO:0004252(serine-type endopeptidase activity);GO:0005044(scavenger receptor activity);GO:0006508(proteolysis);GO:0006898(receptor-mediated endocytosis);GO:0016020(membrane)	NA	NA	NA	PREDICTED: uncharacterized protein LOC109586260 [Amphimedon queenslandica]	0.343461	0.497851	0.465785	1.65582	1.4205	1.15478	0.308926	-1.69467	0.000182684	0.0172912	down	yes
MSTRG.18998	Em0014g148a	Em0014g148a.t1	NA	NA	NA	NA		10.5683	12.468	33.1723	9.00351	6.15044	5.0928	2.77618	1.4731	0.000191939	0.0179949	up	yes
MSTRG.27926	Em0022g772a;Em0022g807a	Em0022g772a.t1;Em0022g807a.t1	NA	NA	NA	NA	PREDICTED: uncharacterized protein LOC109592057, partial [Amphimedon queenslandica]	18.3886	37.2071	35.832	53.549	70.9932	78.3974	0.450517	-1.15035	0.000205418	0.0191678	down	yes
Em0015g752a	Em0015g752a	Em0015g752a.t1	NA	04120(Ubiquitin mediated proteolysis)	K03354	NA	PREDICTED: anaphase-promoting complex subunit 7-like [Amphimedon queenslandica]	0	0.080927	0.058093	0.435197	0.557406	0.743998	0.0800529	-3.6429	0.000236893	0.0217964	down	yes
MSTRG.11240	Em0007g207a	Em0007g207a.t1	GO:0000790(nuclear chromatin);GO:0003677(DNA binding);GO:0006342(chromatin silencing)	NA	NA	NA	PREDICTED: LOW QUALITY PROTEIN: uncharacterized protein LOC106837883 [Equus asinus]	0.439977	0.942609	1.09743	1.6181	6.10991	2.7822	0.235962	-2.08337	0.000249261	0.0227229	down	yes
MSTRG.6467	Em0003g1642a;Em0003g1647a	Em0003g1642a.t1;Em0003g1647a.t1	GO:0005351(carbohydrate:proton symporter activity);GO:0005355(glucose transmembrane transporter activity);GO:0005887(integral component of plasma membrane);GO:0046323(glucose import);GO:0046323(glucose import)	NA	NA	NA	Solute carrier family 2, facilitated glucose transporter member 8 [Stylophora pistillata];hypothetical protein CAPTEDRAFT_200986 [Capitella teleta]	4.88736	3.52958	3.48522	0.73693	0.724762	2.65955	2.888	1.53007	0.000290781	0.0263864	up	yes
MSTRG.964	Em0001g1140a	Em0001g1140a.t1	GO:0003723(RNA binding);GO:0005515(protein binding);GO:0005634(nucleus);GO:0005697(telomerase holoenzyme complex);GO:0005737(cytoplasm);GO:0007004(telomere maintenance via telomerase);GO:0015030(Cajal body);GO:0032203(telomere formation via telomerase);GO:0032212(positive regulation of telomere maintenance via telomerase);GO:0051087(chaperone binding);GO:0051973(positive regulation of telomerase …	NA	NA	NA	hypothetical protein BRAFLDRAFT_277111 [Branchiostoma floridae]	0	0.071289	0	1.04531	0.047485	1.40844	0.0285015	-5.13282	0.000292969	0.0264635	down	yes
MSTRG.25540	Em0020g596a	Em0020g596a.t1	NA	NA	NA	NA		0.474603	0.463674	0.417826	2.04286	1.09668	1.8731	0.270536	-1.88611	0.000306611	0.027199	down	yes
MSTRG.17561	Em0012g623a	Em0012g623a.t1	GO:0000788(nuclear nucleosome);GO:0006334(nucleosome assembly);GO:0031492(nucleosomal DNA binding);GO:0046982(protein heterodimerization activity)	05202(Transcriptional misregulation in cancers);05322(Systemic lupus erythematosus);05034(Alcoholism)	K11253	NA	PREDICTED: LOW QUALITY PROTEIN: uncharacterized protein LOC106000001 [Dipodomys ordii]	0.668822	0.669036	1.04086	1.29002	6.22068	2.55448	0.236332	-2.08111	0.000321902	0.0283754	down	yes
MSTRG.27961	Em0022g804a	Em0022g804a.t1	NA	NA	NA	NA		4.42942	8.38733	9.79916	25.2379	15.1669	18.1747	0.386073	-1.37306	0.000356613	0.0306718	down	yes
MSTRG.13205	Em0008g713a	Em0008g713a.t1	GO:0002224(toll-like receptor signaling pathway);GO:0004842(ubiquitin-protein transferase activity);GO:0005164(tumor necrosis factor receptor binding);GO:0008063(Toll signaling pathway);GO:0008270(zinc ion binding);GO:0009898(cytoplasmic side of plasma membrane);GO:0016567(protein ubiquitination);GO:0019901(protein kinase binding);GO:0019903(protein phosphatase binding);GO:0030162(regulation of p…	04620(Toll-like receptor signaling pathway);04621(NOD-like receptor signaling pathway);04622(RIG-I-like receptor signaling pathway);05168(Herpes simplex infection)	K03174	NA	PREDICTED: TNF receptor-associated factor 3-like [Amphimedon queenslandica]	19.1844	6.55805	16.3903	5.60436	8.01138	4.98988	2.26452	1.1792	0.00036154	0.030961	up	yes
MSTRG.31971	Em0420g1a	Em0420g1a.t1	GO:0005515(protein binding)	NA	NA	NA	CAP-Gly domain-containing linker protein 3 [Pseudonaja textilis]	0.50313	0.394742	0.659054	2.35306	2.75868	0.573081	0.273874	-1.86841	0.000370352	0.0315789	down	yes
MSTRG.23576	Em0018g858a	Em0018g858a.t1	GO:0003674(molecular_function);GO:0005764(lysosome);GO:0005770(late endosome);GO:0008150(biological_process);GO:0016020(membrane);GO:0016021(integral component of membrane)	NA	NA	NA	PREDICTED: mucolipin-3-like [Amphimedon queenslandica]	0.198808	0.911274	0.360542	1.59165	1.71472	2.70759	0.244535	-2.03189	0.00037347	0.0317081	down	yes
MSTRG.25316	Em0020g267a	Em0020g267a.t1	NA	NA	NA	NA		6.53476	7.36367	6.10597	4.19608	2.37141	2.51414	2.20273	1.13929	0.000443095	0.0369844	up	yes
MSTRG.4132	Em0002g1242a	Em0002g1242a.t1	NA	NA	NA	NA		3.0663	2.88636	2.16666	1.42132	0.892938	1.09058	2.38465	1.25378	0.000449117	0.0372927	up	yes
Em0003g1713a	Em0003g1713a	Em0003g1713a.t1	GO:0003887(DNA-directed DNA polymerase activity);GO:0003964(RNA-directed DNA polymerase activity);GO:0004190(aspartic-type endopeptidase activity);GO:0005575(cellular_component);GO:0006310(DNA recombination);GO:0015074(DNA integration);GO:0046872(metal ion binding)	NA	NA	NA	uncharacterized protein K02A2.6-like [Onthophagus taurus]	0.682891	0.402821	0.005767	0.011498	0.042305	0.005806	18.3106	4.19461	0.000472604	0.038815	up	yes
MSTRG.18866	Em0013g1094a;Em0013g1105a	Em0013g1094a.t1;Em0013g1105a.t1	NA	NA	NA	NA		21.1508	12.1988	32.8334	10.5616	12.296	9.67233	2.03453	1.02469	0.000488777	0.039627	up	yes
Em0010g489a	Em0010g489a	Em0010g489a.t1	GO:0004536(deoxyribonuclease activity);GO:0006308(DNA catabolic process)	04621(NOD-like receptor signaling pathway)	K04612	NA	Retrovirus-related Pol polyprotein from transposon [Trichinella nativa]	0.181329	0.083416	0.059482	0.4838	0.363838	0.366079	0.267136	-1.90436	0.000504173	0.0405429	down	yes
MSTRG.4068	Em0002g1214a	Em0002g1214a.t1	GO:0000166(nucleotide binding);GO:0004672(protein kinase activity);GO:0004713(protein tyrosine kinase activity);GO:0004715(non-membrane spanning protein tyrosine kinase activity);GO:0005102(receptor binding);GO:0005524(ATP binding);GO:0006468(protein phosphorylation);GO:0007169(transmembrane receptor protein tyrosine kinase signaling pathway);GO:0016301(kinase activity);GO:0016310(phosphorylation…	04910(Insulin signaling pathway)	K07193	NA	PREDICTED: basic proline-rich protein-like isoform X2 [Amphimedon queenslandica]	4.63902	3.13281	3.84247	0.587124	1.61068	2.33079	2.56466	1.35877	0.000597933	0.0465681	up	yes
MSTRG.18659	Em0013g869a	Em0013g869a.t1	NA	NA	NA	NA		3.37948	4.24671	4.24695	1.71298	1.50736	0.598401	3.10917	1.63653	0.000624985	0.0479204	up	yes
MSTRG.31029	Em0120g8a	Em0120g8a.t1	GO:0004536(deoxyribonuclease activity);GO:0006308(DNA catabolic process)	03015(mRNA surveillance pathway)	K14401	NA	Transposon Ty3-I Gag-Pol polyprotein [Trichinella sp. T6]	0.431794	0.206156	0.2023	1.44487	0.370079	1.03586	0.29474	-1.76248	0.000631779	0.0482543	down	yes
MSTRG.25295	Em0020g234a	Em0020g234a.t1	NA	NA	NA	NA		1.29344	1.4116	1.35002	4.07663	3.00465	4.20931	0.359154	-1.47732	0.00065723	0.0500051	down	yes
MSTRG.9940	Em0006g464a	Em0006g464a.t1	NA	NA	NA	NA		1.81739	2.75826	1.51368	4.16374	4.81661	6.04607	0.405242	-1.30314	0.000694562	0.0520448	down	yes
MSTRG.32179	Em0528g2a	Em0528g2a.t1	GO:0003723(RNA binding);GO:0005737(cytoplasm)	NA	NA	NA	PREDICTED: vigilin-like [Lepisosteus oculatus]	3.44828	7.772	1.46411	1.82393	0.720862	0.781708	3.81314	1.93098	0.000697403	0.0520605	up	yes
MSTRG.2064	Em0001g2183a	Em0001g2183a.t1	NA	NA	NA	NA	PREDICTED: uncharacterized protein LOC105313063 [Amphimedon queenslandica]	1.35718	0.934812	2.20307	3.5446	3.73757	4.01582	0.397864	-1.32965	0.000762698	0.0560881	down	yes
MSTRG.24268	Em0019g292a	Em0019g292a.t1	GO:0000166(nucleotide binding);GO:0004672(protein kinase activity);GO:0004674(protein serine/threonine kinase activity);GO:0005524(ATP binding);GO:0005634(nucleus);GO:0005737(cytoplasm);GO:0005795(Golgi stack);GO:0006468(protein phosphorylation);GO:0007049(cell cycle);GO:0008360(regulation of cell shape);GO:0016301(kinase activity);GO:0016310(phosphorylation);GO:0016740(transferase activity);GO:0…	NA	NA	NA	PREDICTED: nucleosomal histone kinase 1-like [Amphimedon queenslandica]	0.138001	0.802701	0.480016	1.54808	1.94184	1.5748	0.280513	-1.83386	0.000796565	0.0583617	down	yes
MSTRG.22561	Em0017g556a	Em0017g556a.t1	GO:0006636(unsaturated fatty acid biosynthetic process);GO:0016717(oxidoreductase activity, acting on paired donors, with oxidation of a pair of donors resulting in the reduction of molecular oxygen to two molecules of water);GO:0042759(long-chain fatty acid biosynthetic process)	01040(Biosynthesis of unsaturated fatty acids)	K10224	EC:1.14.19.44	PREDICTED: acyl-lipid (8-3)-desaturase-like [Amphimedon queenslandica]	3.50536	3.80244	4.19884	1.60304	2.415	1.66949	2.02314	1.01659	0.000850575	0.0620888	up	yes
MSTRG.6134	Em0002g178a	Em0002g178a.t1	GO:0005525(GTP binding)	NA	NA	NA	PREDICTED: uncharacterized protein LOC105315658 [Amphimedon queenslandica]	1.29666	0.50219	0.973359	2.59076	2.10343	3.33182	0.345404	-1.53364	0.000860612	0.0625906	down	yes
MSTRG.9939	Em0006g463a	Em0006g463a.t1	NA	NA	NA	NA		1.52576	2.25645	0.765253	3.16208	4.89476	4.63986	0.358161	-1.48132	0.00105763	0.0755306	down	yes
MSTRG.30916	Em0105g6a	Em0105g6a.t1	GO:0004674(protein serine/threonine kinase activity);GO:0005634(nucleus);GO:0005737(cytoplasm);GO:0008360(regulation of cell shape);GO:0018105(peptidyl-serine phosphorylation)	NA	NA	NA	PREDICTED: uncharacterized protein K02A2.6-like [Cyprinus carpio]	0	0.38325	0.698871	0	0.022339	0	48.4409	5.59815	0.00106248	0.0756042	up	yes
MSTRG.27572	Em0022g429a;Em0022g430a	Em0022g429a.t1;Em0022g430a.t1	GO:0000784(nuclear chromosome, telomeric region);GO:0000786(nucleosome);GO:0003677(DNA binding);GO:0005654(nucleoplasm);GO:0006335(DNA replication-dependent nucleosome assembly);GO:0006336(DNA replication-independent nucleosome assembly);GO:0006352(DNA-templated transcription, initiation);GO:0016020(membrane);GO:0019904(protein domain specific binding);GO:0042393(histone binding);GO:0045653(negat…	05203(Viral carcinogenesis);05322(Systemic lupus erythematosus);05034(Alcoholism);05034(Alcoholism)	K11254	NA	PREDICTED: histone H3-like 2 isoform X2 [Fukomys damarensis];PREDICTED: LOW QUALITY PROTEIN: uncharacterized protein LOC101323424 [Tursiops truncatus]	19.9991	28.9006	11.461	35.1025	44.5133	42.9341	0.49254	-1.02169	0.0010874	0.0771003	down	yes
MSTRG.5068	Em0003g239a	Em0003g239a.t1	GO:0005525(GTP binding)	NA	NA	NA	PREDICTED: uncharacterized protein LOC105315658 [Amphimedon queenslandica]	0.195943	0.126689	0.012756	0.472185	0.522866	0.684174	0.199728	-2.32389	0.00109928	0.0776641	down	yes
MSTRG.22360	Em0017g339a	Em0017g339a.t1	NA	NA	NA	NA	PREDICTED: uncharacterized protein LOC109581193 [Amphimedon queenslandica]	0.168414	0.266157	0.150798	0.615254	1.17091	1.40044	0.183697	-2.4446	0.00110445	0.0777518	down	yes
MSTRG.20082	Em0015g316a	Em0015g316a.t1	GO:0004568(chitinase activity);GO:0005576(extracellular region);GO:0006032(chitin catabolic process);GO:0008061(chitin binding)	NA	NA	NA	uncharacterized protein LOC111327624 [Stylophora pistillata]	2.3165	1.54231	3.11556	0.769381	0.749689	1.1576	2.60562	1.38162	0.00114245	0.0798587	up	yes
MSTRG.19443	Em0014g730a;Em0014g729a	Em0014g730a.t1;Em0014g729a.t1	NA	NA	NA	NA		0.708346	1.30056	0.432558	1.97172	1.946	2.19919	0.399134	-1.32505	0.00116755	0.0813253	down	yes
MSTRG.32542	Em0759g4a	Em0759g4a.t1	NA	NA	NA	NA		35.7838	74.2841	69.4154	97.4283	130.162	135.731	0.494007	-1.0174	0.00117501	0.0815583	down	yes
MSTRG.24118	Em0019g157a	Em0019g157a.t1	GO:0004066(asparagine synthase (glutamine-hydrolyzing) activity);GO:0006529(asparagine biosynthetic process);GO:0042149(cellular response to glucose starvation);GO:0043066(negative regulation of apoptotic process);GO:0045931(positive regulation of mitotic cell cycle)	00250(Alanine, aspartate and glutamate metabolism)	K01953	EC:6.3.5.4	PREDICTED: asparagine synthetase [glutamine-hydrolyzing] [Pygocentrus nattereri]	3.08197	2.85187	2.8891	1.36885	1.57459	1.33318	2.06306	1.04479	0.00121651	0.0838503	up	yes
MSTRG.2093	Em0001g2214a	Em0001g2214a.t1	GO:0000324(fungal-type vacuole);GO:0000747(conjugation with cellular fusion);GO:0004252(serine-type endopeptidase activity);GO:0005794(Golgi apparatus);GO:0006508(proteolysis);GO:0006914(autophagy);GO:0007033(vacuole organization);GO:0007039(protein catabolic process in the vacuole);GO:0009267(cellular response to starvation);GO:0042802(identical protein binding);GO:0043086(negative regulation of…	NA	NA	NA	PREDICTED: proteinase T-like [Amphimedon queenslandica]	3.15315	3.92968	3.65434	4.93578	10.0409	8.42805	0.45876	-1.12419	0.00124648	0.0856174	down	yes
MSTRG.7991	Em0004g1403a	Em0004g1403a.t1	GO:0004842(ubiquitin-protein transferase activity);GO:0005515(protein binding);GO:0005622(intracellular);GO:0005737(cytoplasm);GO:0008270(zinc ion binding);GO:0016740(transferase activity);GO:0017022(myosin binding);GO:0043523(regulation of neuron apoptotic process);GO:0046872(metal ion binding);GO:0061630(ubiquitin protein ligase activity);GO:1990830(cellular response to leukemia inhibitory fact…	NA	NA	NA	PREDICTED: E3 ubiquitin-protein ligase TRIM71-like [Amphimedon queenslandica]	0.182673	1.03053	0.876992	0.022885	0.218844	0.130907	5.60922	2.4878	0.00127603	0.0870429	up	yes
MSTRG.19376	Em0014g477a	Em0014g477a.t1	GO:0000981(RNA polymerase II transcription factor activity, sequence-specific DNA binding);GO:0003677(DNA binding);GO:0005654(nucleoplasm);GO:0005737(cytoplasm)	NA	NA	NA	zinc finger MYM-type protein 1-like [Trichoplusia ni]	0.450666	0.446235	0.364162	0.212423	0.042904	0.092006	3.6307	1.86025	0.00133273	0.0905984	up	yes
MSTRG.10825	Em0006g1103a	Em0006g1103a.t1	GO:0003322(pancreatic A cell development);GO:0003677(DNA binding);GO:0005634(nucleus);GO:0006351(transcription, DNA-templated);GO:0006355(regulation of transcription, DNA-templated);GO:0007275(multicellular organism development);GO:0021539(subthalamus development);GO:0043565(sequence-specific DNA binding);GO:0048666(neuron development)	NA	NA	NA	Arx [Terebratalia transversa]	0.20135	0	0	2.26677	0.115174	1.32233	0.0543561	-4.20141	0.00137094	0.0919317	down	yes
MSTRG.20230	Em0015g469a	Em0015g469a.t1	NA	NA	NA	NA		1.91895	1.33939	1.62742	0.644415	0.852491	0.542728	2.39541	1.26027	0.00139842	0.0934579	up	yes
MSTRG.20941	Em0015g1250a	Em0015g1250a.t1	GO:0005737(cytoplasm);GO:0030170(pyridoxal phosphate binding)	00260(Glycine, serine and threonine metabolism);00270(Cysteine and methionine metabolism);00290(Valine, leucine and isoleucine biosynthesis)	K17989	EC:4.3.1.17;EC:4.3.1.19	PREDICTED: L-serine dehydratase/L-threonine deaminase-like [Branchiostoma belcheri]	3.06068	2.82901	3.03028	6.67568	5.95657	6.23494	0.472777	-1.08077	0.00144657	0.0960268	down	yes
MSTRG.26805	Em0021g675a	Em0021g675a.t1	GO:0003677(DNA binding);GO:0005654(nucleoplasm);GO:0006351(transcription, DNA-templated);GO:0010793(regulation of mRNA export from nucleus);GO:0050684(regulation of mRNA processing);GO:0090239(regulation of histone H4 acetylation);GO:2001253(regulation of histone H3-K36 trimethylation)	NA	NA	NA	hypothetical protein ALC60_12815 [Trachymyrmex zeteki]	1.119	2.10216	0.925709	2.80132	3.61622	3.55822	0.415694	-1.2664	0.00147941	0.0978788	down	yes
MSTRG.10512	Em0006g803a	Em0006g803a.t1	NA	NA	NA	NA	PREDICTED: cell death-inducing p53-target protein 1 homolog isoform X1 [Amphimedon queenslandica]	2.63335	1.68264	2.46401	0.878804	0.940293	1.0721	2.34505	1.22962	0.00152222	0.0994914	up	yes
MSTRG.12096	Em0007g1101a	Em0007g1101a.t1	GO:0003700(DNA binding transcription factor activity);GO:0005634(nucleus);GO:0043565(sequence-specific DNA binding)	NA	NA	NA	uncharacterized protein LOC110253781, partial [Exaiptasia pallida]	0.861892	0.42175	0.766684	0.171214	0.319108	0.149844	3.2028	1.67934	0.0015239	0.0994914	up	yes
MSTRG.16707	Em0011g1008a	Em0011g1008a.t1	GO:0005634(nucleus);GO:0005667(transcription factor complex);GO:0005737(cytoplasm);GO:0009266(response to temperature stimulus);GO:0009416(response to light stimulus);GO:0045892(negative regulation of transcription, DNA-templated)	NA	NA	NA	PREDICTED: cryptochrome-2-like [Amphimedon queenslandica]	0.854867	0.748974	0.593706	0.250161	0.145738	0.226001	3.5336	1.82114	0.00159444	0.102756	up	yes
MSTRG.24324	Em0019g389a;Em0019g390a	Em0019g389a.t1;Em0019g390a.t1	GO:0003140(determination of left/right asymmetry in lateral mesoderm);GO:0003401(axis elongation);GO:0005856(cytoskeleton);GO:0035469(determination of pancreatic left/right asymmetry);GO:0035844(cloaca development);GO:0048793(pronephros development);GO:0060028(convergent extension involved in axis elongation);GO:0060828(regulation of canonical Wnt signaling pathway);GO:0061371(determination of he…	NA	NA	NA	PREDICTED: nephrocystin-4 isoform X1 [Paralichthys olivaceus];PREDICTED: uncharacterized protein LOC109584796 isoform X5 [Amphimedon queenslandica]	1.27362	1.15324	1.20783	0.789228	0.341606	0.473791	2.26513	1.1796	0.00159469	0.102756	up	yes
MSTRG.6073	Em0003g1502a;Em0003g1504a;Em0003g1505a;Em0003g1503a	Em0003g1502a.t1;Em0003g1504a.t1;Em0003g1505a.t1;Em0003g1503a.t1	GO:0004842(ubiquitin-protein transferase activity);GO:0005634(nucleus);GO:0005737(cytoplasm);GO:0005829(cytosol);GO:0016874(ligase activity);GO:0043066(negative regulation of apoptotic process)	04120(Ubiquitin mediated proteolysis);04144(Endocytosis)	K10591	EC:2.3.2.26	apoptosis-resistant E3 ubiquitin protein ligase 1 [Electrophorus electricus];apoptosis-resistant E3 ubiquitin protein ligase 1 [Ctenocephalides felis]	1.46823	1.69844	0.91582	3.31927	2.26391	3.42341	0.453277	-1.14153	0.00165017	0.105643	down	yes
MSTRG.28297	Em0023g261a	Em0023g261a.t1	NA	NA	NA	NA		0.21452	0.19687	0.489971	0.046827	0.039565	0.101135	4.80657	2.26501	0.00175888	0.111163	up	yes
MSTRG.20095	Em0015g328a	Em0015g328a.t1	NA	NA	NA	NA		0.521579	0.470867	0.218109	1.26232	1.31857	1.8643	0.27233	-1.87657	0.00183085	0.113893	down	yes
MSTRG.18139	Em0013g290a	Em0013g290a.t1	GO:0003735(structural constituent of ribosome);GO:0005763(mitochondrial small ribosomal subunit)	NA	NA	NA	PREDICTED: 28S ribosomal protein S22, mitochondrial [Hippocampus comes]	0.315567	3.19635	3.04356	0.421228	0	0.411222	7.87492	2.97726	0.00185422	0.114985	up	yes
MSTRG.32579	Em0784g1a	Em0784g1a.t1	GO:0005942(phosphatidylinositol 3-kinase complex);GO:0008286(insulin receptor signaling pathway);GO:0043551(regulation of phosphatidylinositol 3-kinase activity);GO:0046854(phosphatidylinositol phosphorylation);GO:0046935(1-phosphatidylinositol-3-kinase regulator activity)	04068(FoxO signaling pathway);04070(Phosphatidylinositol signaling system);04150(mTOR signaling pathway);04140(Autophagy - animal);04933(AGE-RAGE signaling pathway in diabetic complications)	K02649	NA	PREDICTED: phosphatidylinositol 3-kinase regulatory subunit gamma-like [Amphimedon queenslandica]	0.91624	0.313428	0.356685	1.28933	1.21606	1.72038	0.375399	-1.4135	0.00188528	0.116546	down	yes
MSTRG.31200	Em0145g2a	Em0145g2a.t1	NA	NA	NA	NA		4.12012	2.46599	1.75337	6.19307	4.57759	6.34969	0.487109	-1.03768	0.00196702	0.120469	down	yes
MSTRG.32297	Em0589g4a	Em0589g4a.t1	NA	NA	NA	NA	PREDICTED: uncharacterized protein LOC109582278 isoform X1 [Amphimedon queenslandica]	0.984775	2.02474	0.12753	0	0.116976	0.198665	9.93866	3.31305	0.00199287	0.121171	up	yes
MSTRG.10299	Em0006g598a	Em0006g598a.t1	GO:0003674(molecular_function);GO:0005575(cellular_component);GO:0008150(biological_process);GO:0016020(membrane);GO:0016021(integral component of membrane)	NA	NA	NA	PREDICTED: protein DD3-3-like [Amphimedon queenslandica]	0.703059	1.16153	0.183336	1.92114	1.43992	3.98954	0.278607	-1.8437	0.00219787	0.132153	down	yes
MSTRG.23796	Em0018g1045a	Em0018g1045a.t1	GO:0004497(monooxygenase activity);GO:0055114(oxidation-reduction process)	00982(Drug metabolism - cytochrome P450)	K00485	EC:1.14.13.8	PREDICTED: flavin-containing monooxygenase FMO GS-OX5-like [Branchiostoma belcheri]	0.201694	0	0	0.866139	0.78148	0.574886	0.0907508	-3.46195	0.00222089	0.133132	down	yes
MSTRG.13337	Em0008g934a	Em0008g934a.t1	NA	NA	NA	NA		0.893478	1.27617	1.62325	0.116483	0.264003	0.460478	4.51018	2.17318	0.00227851	0.135764	up	yes
MSTRG.13839	Em0009g174a	Em0009g174a.t1	GO:0004674(protein serine/threonine kinase activity);GO:0005634(nucleus);GO:0005737(cytoplasm);GO:0008360(regulation of cell shape);GO:0018105(peptidyl-serine phosphorylation)	NA	NA	NA	uncharacterized protein K02A2.6-like [Oreochromis niloticus]	0.539316	1.13256	0.701467	2.79421	1.44119	1.63464	0.404314	-1.30645	0.00247969	0.14584	down	yes
MSTRG.22774	Em0017g915a	Em0017g915a.t1	GO:0004842(ubiquitin-protein transferase activity);GO:0005737(cytoplasm)	NA	NA	NA	E3 ubiquitin-protein ligase MIB1 [Cricetulus griseus]	1.41488	1.0733	0	0.088833	0	0	28.0096	4.80785	0.00257062	0.148577	up	yes
MSTRG.5822	Em0003g1220a;Em0003g1219a	Em0003g1220a.t1;Em0003g1219a.t1	GO:0005741(mitochondrial outer membrane);GO:0008808(cardiolipin synthase activity);GO:0032049(cardiolipin biosynthetic process);GO:0034587(piRNA metabolic process);GO:0034587(piRNA metabolic process)	NA	NA	NA	PREDICTED: uncharacterized protein LOC105312134 [Amphimedon queenslandica]	2.76699	0.96774	5.22892	1.70395	0.523574	0.782206	2.97822	1.57445	0.00257807	0.148577	up	yes
MSTRG.12333	Em0007g1462a	Em0007g1462a.t1	GO:0000166(nucleotide binding);GO:0003924(GTPase activity);GO:0005525(GTP binding);GO:0007165(signal transduction);GO:0016020(membrane)	04150(mTOR signaling pathway);04140(Autophagy - animal)	K07208	NA	Rheb [Suberites domuncula]	7.66288	5.5788	4.87013	3.62827	2.05232	3.1856	2.04279	1.03054	0.002637	0.150343	up	yes
MSTRG.7304	Em0004g583a	Em0004g583a.t1	NA	NA	NA	NA		0.004402	1.2045	1.30366	0	0	0.10223	24.5775	4.61927	0.00264479	0.150343	up	yes
MSTRG.17677	Em0012g845a	Em0012g845a.t1	GO:0005622(intracellular);GO:0008270(zinc ion binding);GO:0046872(metal ion binding)	NA	NA	NA	PREDICTED: tripartite motif-containing protein 3-like [Amphimedon queenslandica]	1.96559	2.12859	1.36296	0.925042	0.8254	0.782491	2.15448	1.10734	0.00289549	0.161348	up	yes
MSTRG.15109	Em0010g274a	Em0010g274a.t1	NA	04141(Protein processing in endoplasmic reticulum);04140(Autophagy - animal)	K08852	EC:2.7.11.1;EC:3.1.26.-	ATP N-glycosidase 1 [Ephydatia muelleri]	2.69793	4.5329	6.70317	11.314	12.4577	7.3461	0.447782	-1.15913	0.00291236	0.161832	down	yes
MSTRG.24464	Em0019g592a	Em0019g592a.t1	GO:0004402(histone acetyltransferase activity);GO:0005634(nucleus);GO:0006355(regulation of transcription, DNA-templated);GO:0016573(histone acetylation);GO:0060215(primitive hemopoiesis);GO:0060319(primitive erythrocyte differentiation)	NA	NA	NA	histone acetyltransferase KAT5-like isoform X1 [Orbicella faveolata]	0.68056	0.464871	0.877644	0.184401	0.126918	0.404601	2.82584	1.49868	0.00298675	0.165039	up	yes
MSTRG.19567	Em0014g767a	Em0014g767a.t1	GO:0070062(extracellular exosome)	NA	NA	NA	PREDICTED: leucine-rich repeat-containing protein 57-like [Branchiostoma belcheri]	1.00534	0.709628	0.835945	2.3666	2.11653	2.64492	0.357869	-1.48249	0.00303913	0.167	down	yes
MSTRG.31586	Em0234g2a	Em0234g2a.t1	NA	NA	NA	NA		0.762216	1.47693	1.13917	0.687096	3.28064	10.8086	0.22863	-2.12891	0.0030936	0.168745	down	yes
MSTRG.14119	Em0009g589a	Em0009g589a.t1	NA	NA	NA	NA		0.448673	0.140926	0	0.111535	0.662623	7.18963	0.074035	-3.75565	0.00314555	0.170612	down	yes
MSTRG.22730	Em0017g848a	Em0017g848a.t1	GO:0005216(ion channel activity);GO:0006811(ion transport);GO:0008381(mechanosensitive ion channel activity);GO:0009593(detection of chemical stimulus);GO:0015276(ligand-gated ion channel activity);GO:0015278(calcium-release channel activity);GO:0016020(membrane);GO:0016021(integral component of membrane);GO:0034220(ion transmembrane transport);GO:0050960(detection of temperature stimulus involve…	NA	NA	NA	PREDICTED: transient receptor potential cation channel subfamily A member 1 homolog, partial [Amphimedon queenslandica]	0.023537	0.16805	0.441667	0.738972	1.20699	1.23191	0.19927	-2.32721	0.0031566	0.170612	down	yes
MSTRG.29813	Em0029g32a	Em0029g32a.t1	GO:0045454(cell redox homeostasis)	NA	NA	NA	tripartite motif-containing protein 2-like isoform X2 [Rhincodon typus]	0.20581	0.105637	0.325933	0.61833	0.738242	0.765679	0.300332	-1.73537	0.00320226	0.171672	down	yes
MSTRG.1782	Em0001g2024a	Em0001g2024a.t1	GO:0005096(GTPase activator activity);GO:0043547(positive regulation of GTPase activity)	NA	NA	NA	PREDICTED: titin-like [Amphimedon queenslandica]	1.09739	0.761623	0.669052	1.52683	2.11101	1.52682	0.489494	-1.03064	0.0032165	0.17197	down	yes
MSTRG.28430	Em0023g342a	Em0023g342a.t1	GO:0004715(non-membrane spanning protein tyrosine kinase activity);GO:0005102(receptor binding);GO:0007169(transmembrane receptor protein tyrosine kinase signaling pathway);GO:0030154(cell differentiation);GO:0031234(extrinsic component of cytoplasmic side of plasma membrane);GO:0038083(peptidyl-tyrosine autophosphorylation);GO:0042127(regulation of cell proliferation);GO:0045087(innate immune re…	NA	NA	NA	protein tyrosine kinase [Ephydatia fluviatilis]	0.198805	0.260818	0.241616	0.731572	0.775728	0.996592	0.28006	-1.83619	0.00323024	0.172239	down	yes
MSTRG.19423	Em0014g700a	Em0014g700a.t1	NA	NA	NA	NA	PREDICTED: uncharacterized protein LOC109581366 isoform X1 [Amphimedon queenslandica]	0.204568	0.28146	0.422223	0.873159	0.942928	0.571687	0.380376	-1.3945	0.00340824	0.180272	down	yes
MSTRG.22702	Em0017g784a	Em0017g784a.t1	GO:0004252(serine-type endopeptidase activity);GO:0005044(scavenger receptor activity);GO:0006508(proteolysis);GO:0006898(receptor-mediated endocytosis);GO:0016020(membrane)	NA	NA	NA	PREDICTED: uncharacterized protein LOC109586260 [Amphimedon queenslandica]	0.311512	0.347219	0.23498	0.684475	0.762599	0.985856	0.36734	-1.44481	0.00356934	0.187291	down	yes
MSTRG.3165	Em0001g3631a	Em0001g3631a.t1	NA	NA	NA	NA		3.01923	1.89092	3.43129	5.57782	5.36264	7.93002	0.442036	-1.17776	0.00359387	0.188079	down	yes
MSTRG.10300	Em0006g599a	Em0006g599a.t1	GO:0003674(molecular_function);GO:0005575(cellular_component);GO:0008150(biological_process);GO:0016020(membrane);GO:0016021(integral component of membrane)	NA	NA	NA	PREDICTED: protein DD3-3-like [Amphimedon queenslandica]	1.11919	2.31579	0.523719	2.7785	2.41331	6.61214	0.335371	-1.57617	0.00360971	0.18841	down	yes
MSTRG.27936	Em0022g780a	Em0022g780a.t1	NA	NA	NA	NA	PREDICTED: uncharacterized protein LOC109592057, partial [Amphimedon queenslandica]	3.24985	4.24934	0.543368	4.60712	11.1245	8.28785	0.334835	-1.57848	0.00363921	0.189207	down	yes
MSTRG.2174	Em0001g2833a	Em0001g2833a.t1	NA	NA	NA	NA		0.905479	0.430023	0.388374	0.226672	0.604735	15.8204	0.103525	-3.27195	0.00364412	0.189207	down	yes
MSTRG.29788	Em0030g21a	Em0030g21a.t1	NA	NA	NA	NA	PREDICTED: uncharacterized protein LOC109582688 [Amphimedon queenslandica]	0.501216	0.295308	0.337805	0.275871	1.50353	2.07565	0.294245	-1.76491	0.00385224	0.198013	down	yes
MSTRG.10826	Em0006g1104a	Em0006g1104a.t1	GO:0000981(RNA polymerase II transcription factor activity, sequence-specific DNA binding);GO:0003677(DNA binding);GO:0005654(nucleoplasm);GO:0005737(cytoplasm)	03013(RNA transport);03015(mRNA surveillance pathway);03018(RNA degradation)	K13126	NA	PREDICTED: 52 kDa repressor of the inhibitor of the protein kinase-like [Galendromus occidentalis]	0.023996	0.025599	0.013291	0.35838	0.00786	0.328053	0.0905756	-3.46473	0.00385375	0.198013	down	yes
MSTRG.22773	Em0017g907a	Em0017g907a.t1	GO:0003779(actin binding);GO:0005634(nucleus);GO:0008270(zinc ion binding);GO:0010735(positive regulation of transcription via serum response element binding);GO:0016709(oxidoreductase activity, acting on paired donors, with incorporation or reduction of molecular oxygen, NAD(P)H as one donor, and incorporation of one atom of oxygen);GO:0019417(sulfur oxidation);GO:0030042(actin filament depolyme…	NA	NA	NA	PREDICTED: protein-methionine sulfoxide oxidase MICAL2-like [Amphimedon queenslandica]	0.996387	1.19767	0.457994	1.64037	2.84402	1.65776	0.431779	-1.21164	0.00405532	0.206759	down	yes
MSTRG.2066	Em0001g2185a	Em0001g2185a.t1	NA	NA	NA	NA	PREDICTED: uncharacterized protein LOC105313063 [Amphimedon queenslandica]	0.831581	0.611161	1.32229	2.85353	1.74083	2.33775	0.398873	-1.326	0.00456962	0.227698	down	yes
MSTRG.23075	Em0018g299a	Em0018g299a.t1	GO:0003713(transcription coactivator activity);GO:0005634(nucleus);GO:0005737(cytoplasm);GO:0005758(mitochondrial intermembrane space);GO:0005813(centrosome);GO:0005819(spindle);GO:0005929(cilium);GO:0030496(midbody);GO:0042531(positive regulation of tyrosine phosphorylation of STAT protein);GO:0051457(maintenance of protein location in nucleus);GO:1903506(regulation of nucleic acid-templated tra…	NA	NA	NA	PREDICTED: ADP-ribosylation factor-like protein 2-binding protein [Amphimedon queenslandica]	4.49937	5.16976	6.41194	8.88715	11.2289	12.3348	0.495552	-1.01289	0.0046448	0.230863	down	yes
MSTRG.6012	Em0003g1337a	Em0003g1337a.t1	GO:0000981(RNA polymerase II transcription factor activity, sequence-specific DNA binding);GO:0003677(DNA binding);GO:0005654(nucleoplasm);GO:0005737(cytoplasm)	NA	NA	NA	PREDICTED: zinc finger MYM-type protein 1-like [Amphimedon queenslandica]	0.494516	0.513436	0.01191	0.023668	0	0.066255	11.3415	3.50354	0.00476007	0.235409	up	yes
MSTRG.30891	Em0102g9a	Em0102g9a.t1	NA	NA	NA	NA		0.251636	0.334238	0.400734	0.693508	0.813992	1.02129	0.39015	-1.3579	0.0048297	0.237665	down	yes
MSTRG.3539	Em0002g517a	Em0002g517a.t1	NA	NA	NA	NA		0.431599	1.03474	0.307445	1.33893	2.51181	1.92519	0.307099	-1.70323	0.00495965	0.242252	down	yes
MSTRG.32555	Em0772g1a	Em0772g1a.t1	NA	NA	NA	NA	PREDICTED: uncharacterized protein LOC105314946 isoform X1 [Amphimedon queenslandica]	11.057	7.75478	4.00203	4.73932	3.70909	2.37797	2.10724	1.07535	0.00498435	0.242262	up	yes
MSTRG.20502	Em0015g773a	Em0015g773a.t1	NA	NA	NA	NA	2',5'-oligoadenylate synthetase [Tedania ignis]	2.84697	3.08038	3.3529	3.36692	12.6452	6.80682	0.40669	-1.298	0.00500822	0.242553	down	yes
MSTRG.22255	Em0017g175a	Em0017g175a.t1	NA	NA	NA	NA	PREDICTED: phosphatidylcholine transfer protein-like [Amphimedon queenslandica]	2.78256	1.16583	5.09941	1.3726	1.13626	1.10475	2.50382	1.32413	0.00501486	0.242553	up	yes
MSTRG.5720	Em0003g737a;Em0003g741a	Em0003g737a.t1;Em0003g741a.t1	GO:0005634(nucleus);GO:0005635(nuclear envelope);GO:0005829(cytosol);GO:0006606(protein import into nucleus);GO:0006886(intracellular protein transport);GO:0007165(signal transduction);GO:0008536(Ran GTPase binding);GO:0016020(membrane);GO:0016021(integral component of membrane)	NA	NA	NA	PREDICTED: importin-7-like [Amphimedon queenslandica]	1.05451	1.21916	2.82116	0.908245	0.512376	0.583373	2.54234	1.34615	0.00511346	0.245932	up	yes
MSTRG.6562	Em0003g1805a	Em0003g1805a.t1	GO:0004536(deoxyribonuclease activity);GO:0006308(DNA catabolic process)	NA	NA	NA	Transposon Ty3-G Gag-Pol polyprotein [Trichinella nelsoni]	0.266671	0.5089	0.282429	0.185177	0.030929	0.115708	3.18853	1.67289	0.00514624	0.246496	up	yes
MSTRG.15296	Em0010g516a	Em0010g516a.t1	NA	NA	NA	NA	Transposon Ty3-G Gag-Pol poly [Labeo rohita]	0.906847	1.76259	1.08958	1.75705	3.30638	2.92556	0.470525	-1.08766	0.00536318	0.254423	down	yes
MSTRG.2975	Em0001g3181a	Em0001g3181a.t1	NA	NA	NA	NA		2.41788	0.681526	4.24744	0.711381	0.756692	1.06554	2.89975	1.53593	0.00544831	0.257843	up	yes
MSTRG.24105	Em0019g126a	Em0019g126a.t1	NA	NA	NA	NA		1.36665	2.42021	0.964739	0.435789	0.717227	0.850606	2.37151	1.2458	0.00560718	0.264098	up	yes
MSTRG.909	Em0001g1075a	Em0001g1075a.t1	GO:0004301(epoxide hydrolase activity);GO:0004463(leukotriene-A4 hydrolase activity);GO:0005634(nucleus);GO:0005737(cytoplasm);GO:0005886(plasma membrane);GO:0006508(proteolysis);GO:0008270(zinc ion binding);GO:0019370(leukotriene biosynthetic process);GO:0042277(peptide binding);GO:0043171(peptide catabolic process);GO:0070006(metalloaminopeptidase activity)	00590(Arachidonic acid metabolism)	K01254	EC:3.3.2.6	PREDICTED: leukotriene A-4 hydrolase-like [Amphimedon queenslandica]	1.15869	2.02552	0.322518	0.306224	0.00963834	0.427456	4.71767	2.23807	0.00583247	0.271477	up	yes
MSTRG.2969	Em0001g3175a	Em0001g3175a.t1	NA	NA	NA	NA		3.3201	2.42105	13.2955	1.77038	1.64237	3.33337	2.82187	1.49665	0.00591748	0.274788	up	yes
MSTRG.21382	Em0016g399a	Em0016g399a.t1	NA	NA	NA	NA	uncharacterized protein LOC113677764 [Pocillopora damicornis]	0.321348	0.345427	0.245261	0.730545	0.752894	0.695065	0.418653	-1.25617	0.00602761	0.277298	down	yes
MSTRG.29718	Em0028g37a	Em0028g37a.t1	GO:0000785(chromatin);GO:0000976(transcription regulatory region sequence-specific DNA binding);GO:0003682(chromatin binding);GO:0005677(chromatin silencing complex);GO:0006342(chromatin silencing);GO:0031507(heterochromatin assembly)	NA	NA	NA	PREDICTED: uncharacterized protein LOC100637584 [Amphimedon queenslandica]	5.07543	1.38008	6.26094	1.58483	1.90371	1.34238	2.6323	1.39633	0.00622811	0.281838	up	yes
MSTRG.19920	Em0015g193a	Em0015g193a.t1	NA	NA	NA	NA		1.87184	1.89762	2.47877	1.1737	1.08471	0.827175	2.02498	1.01791	0.00625452	0.281838	up	yes
MSTRG.17598	Em0012g790a	Em0012g790a.t1	NA	NA	NA	NA	PREDICTED: uncharacterized protein LOC109592057, partial [Amphimedon queenslandica]	7.44591	14.3789	16.0539	19.2245	20.75	37.6811	0.487778	-1.0357	0.0063794	0.285896	down	yes
MSTRG.30011	Em0037g2a;Em0037g1a	Em0037g2a.t1;Em0037g1a.t1	NA	NA	NA	NA	hypothetical protein RvY_15049 [Ramazzottius varieornatus];hypothetical protein CGI_10005738 [Crassostrea gigas]	0.968297	0.42594	0.486721	2.43928	1.00886	1.34348	0.392552	-1.34905	0.00678153	0.299447	down	yes
MSTRG.31255	Em0157g3a	Em0157g3a.t1	GO:0005178(integrin binding);GO:0006954(inflammatory response);GO:0007160(cell-matrix adhesion);GO:0007229(integrin-mediated signaling pathway);GO:0008305(integrin complex);GO:0009897(external side of plasma membrane)	04015(Rap1 signaling pathway);04151(PI3K-Akt signaling pathway);04512(ECM-receptor interaction);04145(Phagosome);04510(Focal adhesion);04810(Regulation of actin cytoskeleton);04640(Hematopoietic cell lineage);04611(Platelet activation);04919(Thyroid hormone signaling pathway);04380(Osteoclast differentiation);05206(MicroRNAs in cancer);05205(Proteoglycans in cancer);05418(Fluid shear stress and a…	K06493	NA	integrin beta [Ephydatia muelleri]	0.53053	0.70081	0.452722	0.122576	0.137123	0.380351	2.63114	1.39569	0.00691495	0.303307	up	yes
MSTRG.22326	Em0017g282a	Em0017g282a.t1	GO:0003824(catalytic activity);GO:0004397(histidine ammonia-lyase activity);GO:0005737(cytoplasm);GO:0006547(histidine metabolic process);GO:0006548(histidine catabolic process);GO:0016829(lyase activity);GO:0016841(ammonia-lyase activity)	00340(Histidine metabolism)	K01745	EC:4.3.1.3	LOW QUALITY PROTEIN: histidine ammonia-lyase-like [Rhincodon typus]	1.85054	2.27722	0.782564	3.9076	1.52141	8.79324	0.345257	-1.53426	0.00699706	0.30623	down	yes
MSTRG.8267	Em0004g1748a	Em0004g1748a.t1	GO:0004175(endopeptidase activity);GO:0004930(G-protein coupled receptor activity);GO:0005886(plasma membrane);GO:0007165(signal transduction);GO:0007186(G-protein coupled receptor signaling pathway);GO:0016020(membrane);GO:0016021(integral component of membrane);GO:0030246(carbohydrate binding);GO:0097264(self proteolysis)	NA	NA	NA	PREDICTED: adhesion G-protein coupled receptor G2-like, partial [Amphimedon queenslandica]	0.422984	0.61714	0.270422	1.06096	0.90338	1.20838	0.413068	-1.27555	0.00703163	0.306494	down	yes
MSTRG.9604	Em0005g1464a	Em0005g1464a.t1	NA	NA	NA	NA	PREDICTED: protein phosphatase 1 regulatory subunit 16A-like [Amphimedon queenslandica]	1.26113	1.72472	0.89926	3.62424	2.04043	3.82473	0.409415	-1.28836	0.00703409	0.306494	down	yes
Em0006g285a	Em0006g285a	Em0006g285a.t1	NA	NA	NA	NA	PREDICTED: uncharacterized protein LOC109582278 isoform X1 [Amphimedon queenslandica]	0.949946	0.677893	1.02226	0.169765	0.399028	0.229216	3.32089	1.73157	0.00738521	0.318983	up	yes
MSTRG.13038	Em0008g539a	Em0008g539a.t1	GO:0004930(G-protein coupled receptor activity);GO:0007166(cell surface receptor signaling pathway);GO:0007186(G-protein coupled receptor signaling pathway);GO:0016021(integral component of membrane)	NA	NA	NA	PREDICTED: probable G-protein coupled receptor 157 [Amphimedon queenslandica]	0.446321	1.02361	1.13223	0.290068	0.302662	0.377423	2.68222	1.42343	0.00760351	0.322629	up	yes
MSTRG.13808	Em0009g137a	Em0009g137a.t1	NA	NA	NA	NA		0.63259	3.90858	3.04765	8.77713	5.8914	6.74898	0.354328	-1.49684	0.0076526	0.32278	down	yes
MSTRG.31831	Em0346g4a	Em0346g4a.t1	GO:0005789(endoplasmic reticulum membrane);GO:0008374(O-acyltransferase activity)	00100(Steroid biosynthesis)	K00637	EC:2.3.1.26	PREDICTED: sterol O-acyltransferase 1-like [Amphimedon queenslandica]	0.272194	0.947855	0.291683	1.51817	1.55964	1.51047	0.329477	-1.60175	0.00772698	0.324533	down	yes
MSTRG.19263	Em0014g652a;Em0014g651a	Em0014g652a.t1;Em0014g651a.t1	NA	04520(Adherens junction)	K05705	EC:2.7.10.2	PREDICTED: uncharacterized protein LOC100368964 [Saccoglossus kowalevskii]	2.56939	0.309611	0	4.31911	6.72059	8.62519	0.146403	-2.77198	0.00794379	0.331584	down	yes
MSTRG.30326	Em0053g2a	Em0053g2a.t1	GO:0004536(deoxyribonuclease activity);GO:0006308(DNA catabolic process)	04621(NOD-like receptor signaling pathway)	K04612	NA	Transposon Ty3-I Gag-Pol polyprotein [Trichinella britovi]	0.555062	1.72516	1.23131	0.681485	0.438908	0.426346	2.27028	1.18287	0.00805251	0.333252	up	yes
MSTRG.6071	Em0003g1506a	Em0003g1506a.t1	NA	NA	NA	NA		0.505802	0.28214	0.270824	0.81499	0.88589	1.47791	0.333072	-1.58609	0.00815886	0.336247	down	yes
MSTRG.13214	Em0008g717a	Em0008g717a.t1	GO:0001817(regulation of cytokine production);GO:0002224(toll-like receptor signaling pathway);GO:0002376(immune system process);GO:0005164(tumor necrosis factor receptor binding);GO:0005515(protein binding);GO:0005737(cytoplasm);GO:0005768(endosome);GO:0006915(apoptotic process);GO:0007165(signal transduction);GO:0008063(Toll signaling pathway);GO:0008270(zinc ion binding);GO:0009898(cytoplasmic…	04064(NF-kappa B signaling pathway);04668(TNF signaling pathway);04620(Toll-like receptor signaling pathway);04621(NOD-like receptor signaling pathway);04622(RIG-I-like receptor signaling pathway);04657(IL-17 signaling pathway);05200(Pathways in cancer);05203(Viral carcinogenesis);05222(Small cell lung cancer);05160(Hepatitis C);05168(Herpes simplex infection);05167(Kaposi sarcoma-associated herp…	K03174	NA	PREDICTED: TNF receptor-associated factor 3-like [Amphimedon queenslandica]	1.25284	1.22153	1.72882	0.507984	0.676227	0.888146	2.02822	1.02021	0.00826701	0.339291	up	yes
MSTRG.30259	Em0049g26a	Em0049g26a.t1	GO:0005794(Golgi apparatus);GO:0005886(plasma membrane)	NA	NA	NA	PREDICTED: phosphate transporter PHO1 homolog 1-like [Amphimedon queenslandica]	0.690793	1.12294	0.471652	0.359998	0.302404	0.299551	2.37578	1.2484	0.00833811	0.3415	up	yes
MSTRG.9915	Em0006g477a	Em0006g477a.t1	NA	NA	NA	NA		1.0572	1.51598	0.449641	2.05554	2.40477	2.69333	0.422557	-1.24278	0.00836925	0.342067	down	yes
MSTRG.31154	Em0141g1a	Em0141g1a.t1	NA	NA	NA	NA	PREDICTED: uncharacterized protein LOC105315801 [Amphimedon queenslandica]	3.60488	2.28763	0.742601	0.634172	0.69655	1.08445	2.74726	1.45799	0.00847612	0.34501	up	yes
MSTRG.19704	Em0014g937a	Em0014g937a.t1	GO:0004536(deoxyribonuclease activity);GO:0006308(DNA catabolic process)	04621(NOD-like receptor signaling pathway)	K04612	NA	Transposon Ty3-I Gag-Pol polyprotein [Trichinella sp. T6]	0.568988	0.554995	0.719271	0.350968	0.1954	0.294349	2.19248	1.13256	0.00854548	0.346212	up	yes
Em0360g5a	Em0360g5a	Em0360g5a.t1	GO:0000783(nuclear telomere cap complex);GO:0003691(double-stranded telomeric DNA binding);GO:0031627(telomeric loop formation)	NA	NA	NA	PREDICTED: telomeric repeat-binding factor 2-like [Saccoglossus kowalevskii]	0.19983	0	0	0.78382	0.543915	0.357246	0.118595	-3.07589	0.0086786	0.348235	down	yes
Em0001g3740a	Em0001g3740a	Em0001g3740a.t1	NA	NA	NA	NA		0.200782	0.100532	0.403952	0.647661	0.803883	1.01841	0.285538	-1.80825	0.00892412	0.355205	down	yes
MSTRG.15412	Em0010g776a	Em0010g776a.t1	GO:0005415(nucleoside:sodium symporter activity);GO:0005887(integral component of plasma membrane)	03015(mRNA surveillance pathway)	K14401	NA	polyprotein [Lubomirskia baicalensis]	0.404182	0.602225	0.450466	0.174267	0.176317	0.30804	2.212	1.14535	0.00930899	0.366834	up	yes
MSTRG.24116	Em0019g138a	Em0019g138a.t1	GO:0000151(ubiquitin ligase complex);GO:0000209(protein polyubiquitination);GO:0005737(cytoplasm);GO:0031624(ubiquitin conjugating enzyme binding);GO:0032436(positive regulation of proteasomal ubiquitin-dependent protein catabolic process);GO:0061630(ubiquitin protein ligase activity)	NA	NA	NA	PREDICTED: E3 ubiquitin-protein ligase RNF19A-like [Amphimedon queenslandica]	0.724461	0.55174	0.27344	1.21442	1.10855	1.29396	0.428441	-1.22283	0.00935843	0.367866	down	yes
MSTRG.10273	Em0006g424a	Em0006g424a.t1	NA	NA	NA	NA		0.48361	0.664942	0.686877	0.0222254	0.13589	0.288193	4.11247	2.04001	0.00940487	0.368375	up	yes
MSTRG.18383	Em0013g542a	Em0013g542a.t1	GO:0001934(positive regulation of protein phosphorylation);GO:0004623(phospholipase A2 activity);GO:0005516(calmodulin binding);GO:0005615(extracellular space);GO:0005737(cytoplasm);GO:0005739(mitochondrion);GO:0005815(microtubule organizing center);GO:0005829(cytosol);GO:0006935(chemotaxis);GO:0007204(positive regulation of cytosolic calcium ion concentration);GO:0007613(memory);GO:0014832(urina…	00564(Glycerophospholipid metabolism);00565(Ether lipid metabolism);00590(Arachidonic acid metabolism);00591(Linoleic acid metabolism);00592(alpha-Linolenic acid metabolism)	K16343	EC:3.1.1.4	PREDICTED: 85/88 kDa calcium-independent phospholipase A2-like [Amphimedon queenslandica]	0.100763	0.08278	0.118137	0.901468	0.315639	0.151962	0.220354	-2.1821	0.009501	0.369577	down	yes
MSTRG.19440	Em0014g725a	Em0014g725a.t1	NA	NA	NA	NA		0	0.58265	0	1.33983	1.86842	1.82471	0.115767	-3.11071	0.00951596	0.369577	down	yes
MSTRG.13598	Em0008g1269a	Em0008g1269a.t1	NA	00590(Arachidonic acid metabolism)	K15717	EC:1.11.1.20	prostamide/prostaglandin F synthase-like [Spodoptera litura]	3.11449	1.29176	2.90855	1.49026	0.65175	0.629196	2.63957	1.4003	0.00973902	0.376284	up	yes
MSTRG.25029	Em0019g1158a	Em0019g1158a.t1	GO:0000784(nuclear chromosome, telomeric region);GO:0000786(nucleosome);GO:0003677(DNA binding);GO:0005654(nucleoplasm);GO:0006335(DNA replication-dependent nucleosome assembly);GO:0006336(DNA replication-independent nucleosome assembly);GO:0006352(DNA-templated transcription, initiation);GO:0016020(membrane);GO:0019904(protein domain specific binding);GO:0042393(histone binding);GO:0045653(negat…	NA	NA	NA	uncharacterized protein LOC113588367 [Electrophorus electricus]	0.09096	0.439044	0.322578	1.29118	2.67747	0.381676	0.195981	-2.35121	0.00990769	0.381311	down	yes
MSTRG.18187	Em0013g396a	Em0013g396a.t1	GO:0003779(actin binding);GO:0005198(structural molecule activity);GO:0005654(nucleoplasm);GO:0005737(cytoplasm);GO:0005856(cytoskeleton);GO:0005886(plasma membrane);GO:0005925(focal adhesion);GO:0008180(COP9 signalosome);GO:0019898(extrinsic component of membrane);GO:0030507(spectrin binding);GO:0030866(cortical actin cytoskeleton organization);GO:0042731(PH domain binding);GO:0070062(extracellu…	NA	NA	NA	PREDICTED: protein 4.1-like [Amphimedon queenslandica]	6.54764	4.2051	4.70088	1.78086	3.75198	0.419413	2.59626	1.37644	0.00996182	0.381909	up	yes
MSTRG.22756	Em0017g877a	Em0017g877a.t1	NA	NA	NA	NA		1.38485	1.27944	0.625171	2.4353	2.88696	2.1517	0.440123	-1.18402	0.0101965	0.386918	down	yes
MSTRG.13340	Em0008g941a	Em0008g941a.t1	NA	NA	NA	NA		1.79956	1.53281	0.796453	0.127352	0.81142	0.425623	3.02612	1.59747	0.0104362	0.394004	up	yes
MSTRG.31828	Em0341g3a	Em0341g3a.t1	GO:0005634(nucleus);GO:0006281(DNA repair);GO:0016301(kinase activity)	03450(Non-homologous end-joining)	K06642	EC:2.7.11.1	DNA-dependent protein kinase catalytic subunit-like [Orbicella faveolata]	0.346621	0.67717	0.364846	0.920891	1.12272	0.892381	0.47297	-1.08018	0.0104566	0.394004	down	yes
MSTRG.17250	Em0012g538a	Em0012g538a.t1	NA	NA	NA	NA		0.397138	0.197851	0.512868	1.43259	0.792831	0.591836	0.393239	-1.34652	0.0105344	0.396181	down	yes
MSTRG.13742	Em0009g90a;Em0009g97a;Em0009g78a	Em0009g90a.t1;Em0009g97a.t1;Em0009g78a.t1	GO:0004930(G-protein coupled receptor activity);GO:0016021(integral component of membrane);GO:0017147(Wnt-protein binding);GO:0035567(non-canonical Wnt signaling pathway);GO:0042813(Wnt-activated receptor activity);GO:0060070(canonical Wnt signaling pathway);GO:0000977(RNA polymerase II regulatory region sequence-specific DNA binding);GO:0003700(DNA binding transcription factor activity);GO:00056…	NA	NA	NA	uncharacterized protein LOC110066083 [Orbicella faveolata];zinc finger BED domain-containing protein 1-like [Kryptolebias marmoratus]	0.306268	0.229931	2.48957	0.268813	0.350388	0.346099	3.13454	1.64825	0.0106301	0.399021	up	yes
MSTRG.19533	Em0014g320a	Em0014g320a.t1	NA	04144(Endocytosis)	K17917	NA	hypothetical protein ALC62_16021 [Cyphomyrmex costatus]	0.093587	0.044082	0.316865	0.42603	0.638904	0.56153	0.279461	-1.83928	0.0107701	0.402748	down	yes
MSTRG.30787	Em0091g3a	Em0091g3a.t1	GO:0000166(nucleotide binding);GO:0004672(protein kinase activity);GO:0004712(protein serine/threonine/tyrosine kinase activity);GO:0004713(protein tyrosine kinase activity);GO:0004715(non-membrane spanning protein tyrosine kinase activity);GO:0005524(ATP binding);GO:0005575(cellular_component);GO:0005737(cytoplasm);GO:0006468(protein phosphorylation);GO:0009653(anatomical structure morphogenesis…	NA	NA	NA	PREDICTED: probable serine/threonine-protein kinase drkA [Amphimedon queenslandica]	0.606412	0.519535	0.320052	1.09099	0.766121	1.13373	0.483476	-1.04848	0.010848	0.404133	down	yes
MSTRG.32524	Em0742g1a	Em0742g1a.t1	GO:0004252(serine-type endopeptidase activity);GO:0005044(scavenger receptor activity);GO:0006508(proteolysis);GO:0006898(receptor-mediated endocytosis);GO:0016020(membrane)	NA	NA	NA	PREDICTED: uncharacterized protein LOC109586260 [Amphimedon queenslandica]	0.473126	1.00854	0.373745	1.15692	1.13224	2.627	0.377411	-1.40579	0.0110438	0.40909	down	yes
MSTRG.2526	Em0001g3339a	Em0001g3339a.t1	NA	NA	NA	NA	uncharacterized protein LOC110056026 [Orbicella faveolata]	0.922138	0.793938	1.16596	0.189981	0.277068	0.695349	2.47938	1.30998	0.0110638	0.40909	up	yes
MSTRG.32721	Em0916g1a	Em0916g1a.t1	NA	NA	NA	NA		0.281361	0.686184	0.921616	1.27421	2.75142	1.05856	0.371576	-1.42827	0.0111991	0.409928	down	yes
Em0014g82a	Em0014g82a	Em0014g82a.t1	GO:0004536(deoxyribonuclease activity);GO:0006308(DNA catabolic process)	04621(NOD-like receptor signaling pathway)	K04612	NA	Transposon Ty3-I Gag-Pol polyprotein [Trichinella britovi]	0.148893	0.076379	0.250876	0.307278	0.316	0.802376	0.333986	-1.58214	0.0112315	0.409928	down	yes
MSTRG.26742	Em0021g613a	Em0021g613a.t1	GO:0003697(single-stranded DNA binding);GO:0004519(endonuclease activity);GO:0005634(nucleus);GO:0006289(nucleotide-excision repair);GO:0090305(nucleic acid phosphodiester bond hydrolysis)	03420(Nucleotide excision repair)	K10846	NA	basic immunoglobulin-like variable motif-containing protein isoform X2 [Pelodiscus sinensis]	0.568058	1.20976	0.789683	1.78052	2.11094	1.54664	0.472132	-1.08274	0.011266	0.410432	down	yes
MSTRG.539	Em0001g667a	Em0001g667a.t1	NA	NA	NA	NA		0.679885	1.31046	1.29622	0.130276	0	0.514844	5.0945	2.34894	0.0112983	0.410815	up	yes
MSTRG.31158	Em0140g1a	Em0140g1a.t1	GO:0003677(DNA binding);GO:0005622(intracellular);GO:0005634(nucleus);GO:0006351(transcription, DNA-templated);GO:0006355(regulation of transcription, DNA-templated);GO:0008270(zinc ion binding);GO:0016567(protein ubiquitination);GO:0016740(transferase activity);GO:0030218(erythrocyte differentiation);GO:0033333(fin development);GO:0034243(regulation of transcription elongation from RNA polymeras…	NA	NA	NA	PREDICTED: E3 ubiquitin-protein ligase TRIM71-like [Amphimedon queenslandica]	1.01603	0.396226	0.443069	1.75104	1.35377	1.1421	0.436865	-1.19474	0.0114644	0.412344	down	yes
MSTRG.15239	Em0010g494a	Em0010g494a.t1	NA	NA	NA	NA		0.161372	0.0357173	0.13157	0.145271	1.01277	0.474241	0.201349	-2.31223	0.0115645	0.413686	down	yes
MSTRG.4070	Em0002g1217a	Em0002g1217a.t1	NA	NA	NA	NA		0.472468	0.429146	0.357282	0.827149	0.851731	1.0844	0.455579	-1.13423	0.0118171	0.415213	down	yes
MSTRG.31510	Em0206g6a;Em0206g3a	Em0206g6a.t1;Em0206g3a.t1	GO:0005520(insulin-like growth factor binding);GO:0005886(plasma membrane);GO:0001725(stress fiber);GO:0004714(transmembrane receptor protein tyrosine kinase activity);GO:0005524(ATP binding);GO:0005773(vacuole);GO:0007169(transmembrane receptor protein tyrosine kinase signaling pathway);GO:0009615(response to virus);GO:0009986(cell surface);GO:0016021(integral component of membrane);GO:0018108(p…	NA	NA	NA	protein tyrosine kinase [Ephydatia fluviatilis];plexin-B [Lingula anatina]	0.269666	0.815487	0.739942	1.37254	1.21144	1.35097	0.463815	-1.10838	0.0121339	0.42164	down	yes
MSTRG.31823	Em0341g1a	Em0341g1a.t1	GO:0005634(nucleus);GO:0006281(DNA repair);GO:0016301(kinase activity)	03450(Non-homologous end-joining)	K06642	EC:2.7.11.1	PREDICTED: LOW QUALITY PROTEIN: DNA-dependent protein kinase catalytic subunit-like [Branchiostoma belcheri]	0.12801	0.103765	0.2351	0.333363	0.807436	0.625517	0.264322	-1.91963	0.0123644	0.427608	down	yes
MSTRG.6251	Em0002g297a	Em0002g297a.t1	NA	NA	NA	NA	selectin-like protein 2 [Boltenia villosa]	0.455689	0.372052	0.500187	1.0982	1.22696	1.91797	0.31296	-1.67595	0.0125705	0.433977	down	yes
MSTRG.2185	Em0001g2848a	Em0001g2848a.t1	NA	NA	NA	NA	PREDICTED: uncharacterized protein LOC109582323 isoform X1 [Amphimedon queenslandica]	0.417458	0.338257	0.171965	1.02202	0.856173	0.899206	0.33401	-1.58204	0.0130067	0.444368	down	yes
MSTRG.32637	Em0823g1a	Em0823g1a.t1	GO:0000724(double-strand break repair via homologous recombination);GO:0005634(nucleus);GO:0005654(nucleoplasm);GO:0005829(cytosol);GO:0006281(DNA repair);GO:0006289(nucleotide-excision repair);GO:0008409(5'-3' exonuclease activity);GO:0017108(5'-flap endonuclease activity);GO:0033683(nucleotide-excision repair, DNA incision);GO:0036297(interstrand cross-link repair);GO:0045171(intercellular brid…	03460(Fanconi anemia pathway)	K15363	EC:3.1.21.-;EC:3.1.4.1	Fanconi-associated nuclease 1 [Myotis brandtii]	2.55471	2.68304	0.486417	0.424797	1.0758	0.629295	2.68754	1.42629	0.0131663	0.445049	up	yes
MSTRG.24554	Em0019g660a	Em0019g660a.t1	GO:0018095(protein polyglutamylation)	NA	NA	NA	PREDICTED: tubulin polyglutamylase TTLL4-like [Amphimedon queenslandica]	1.00233	0.62525	0.660122	1.52514	1.4302	1.91586	0.469637	-1.09038	0.0131731	0.445049	down	yes
MSTRG.27612	Em0022g479a	Em0022g479a.t1	NA	NA	NA	NA		0.754141	0.506679	1.66326	0.49853	0.202226	0.454102	2.53198	1.34027	0.0131837	0.445049	up	yes
MSTRG.5772	Em0003g792a	Em0003g792a.t1	GO:0001731(formation of translation preinitiation complex);GO:0002183(cytoplasmic translational initiation);GO:0003743(translation initiation factor activity);GO:0005852(eukaryotic translation initiation factor 3 complex);GO:0006446(regulation of translational initiation);GO:0016282(eukaryotic 43S preinitiation complex);GO:0031369(translation initiation factor binding);GO:0033290(eukaryotic 48S p…	NA	NA	NA	eukaryotic translation initiation factor 3 subunit M-like [Scleropages formosus]	1.18525	1.31325	0.680123	2.12157	1.90454	2.48095	0.488489	-1.0336	0.0137481	0.4564	down	yes
MSTRG.23990	Em0018g1180a	Em0018g1180a.t1	GO:0003824(catalytic activity);GO:0005575(cellular_component);GO:0008152(metabolic process)	NA	NA	NA	PREDICTED: uncharacterized protein F13E9.13, mitochondrial-like [Gekko japonicus]	4.251	2.23504	2.45306	10.6018	4.47761	3.16412	0.489986	-1.02919	0.0138278	0.456831	down	yes
Em0018g591a	Em0018g591a	Em0018g591a.t1	GO:0004536(deoxyribonuclease activity);GO:0006308(DNA catabolic process)	04621(NOD-like receptor signaling pathway)	K04612	NA	Transposon Ty3-I Gag-Pol polyprotein [Trichinella britovi]	0.215792	0.120935	0.267747	0.092274	0.041403	0.033135	3.62368	1.85746	0.0139894	0.458994	up	yes
MSTRG.1261	Em0001g1484a	Em0001g1484a.t1	GO:0005739(mitochondrion);GO:0006400(tRNA modification);GO:0052381(tRNA dimethylallyltransferase activity)	NA	NA	NA	PREDICTED: uncharacterized protein LOC109581930 [Amphimedon queenslandica]	0.161382	0.747443	0.775941	0.154995	0.129845	0.372315	2.56373	1.35824	0.0146426	0.472529	up	yes
MSTRG.11798	Em0007g928a	Em0007g928a.t1	GO:0003779(actin binding);GO:0005509(calcium ion binding);GO:0030041(actin filament polymerization);GO:0030043(actin filament fragmentation);GO:0045010(actin nucleation);GO:0051014(actin filament severing);GO:0051693(actin filament capping)	NA	NA	NA	gelsolin-like protein 2 [Acanthaster planci]	1.25515	2.09973	1.13004	2.12654	2.94146	4.56282	0.465684	-1.10258	0.0147019	0.473669	down	yes
MSTRG.1269	Em0001g1493a	Em0001g1493a.t1	NA	NA	NA	NA		0.716067	0.369722	0.444641	1.48905	1.00684	1.00594	0.437037	-1.19417	0.0148279	0.476952	down	yes
MSTRG.29830	Em0030g36a	Em0030g36a.t1	NA	NA	NA	NA		1.25169	0.748263	0.471256	2.14308	1.16317	1.76388	0.487405	-1.03681	0.0148916	0.478223	down	yes
MSTRG.4047	Em0002g1099a	Em0002g1099a.t1	GO:0005524(ATP binding);GO:0005634(nucleus);GO:0006919(activation of cysteine-type endopeptidase activity involved in apoptotic process);GO:0019899(enzyme binding);GO:0019904(protein domain specific binding);GO:0051402(neuron apoptotic process);GO:0072558(NLRP1 inflammasome complex)	NA	NA	NA	PREDICTED: NACHT, LRR and PYD domains-containing protein 3-like, partial [Amphimedon queenslandica]	0.335285	0.289264	0.390859	1.03055	0.629066	0.670419	0.435791	-1.19829	0.015059	0.482036	down	yes
Em0012g382a	Em0012g382a	Em0012g382a.t1	NA	NA	NA	NA		0	0.163455	0.044172	0.425252	0.267985	0.524477	0.170506	-2.55211	0.0152138	0.486049	down	yes
MSTRG.18759	Em0013g1048a	Em0013g1048a.t1	GO:0005634(nucleus);GO:0005737(cytoplasm);GO:0008340(determination of adult lifespan);GO:0016567(protein ubiquitination);GO:0019941(modification-dependent protein catabolic process);GO:0031386(protein tag);GO:0031625(ubiquitin protein ligase binding);GO:0070628(proteasome binding);GO:2000242(negative regulation of reproductive process)	NA	NA	NA	PREDICTED: ubiquitin-60S ribosomal protein L40 [Aplysia californica]	0.790994	1.13541	1.39403	2.5305	2.3329	2.81645	0.432357	-1.20971	0.0153569	0.487625	down	yes
MSTRG.923	Em0001g1085a	Em0001g1085a.t1	NA	NA	NA	NA		1.62664	2.3723	1.72936	4.47719	3.89013	3.82944	0.469659	-1.09032	0.0157644	0.496555	down	yes
MSTRG.30834	Em0098g14a	Em0098g14a.t1	GO:0004536(deoxyribonuclease activity);GO:0006308(DNA catabolic process)	04621(NOD-like receptor signaling pathway)	K04612	NA	Retrovirus-related Pol polyprotein from transposon 17.6 [Trichinella nativa]	0.971317	1.04465	0.764303	0.531828	0.565002	0.184021	2.17064	1.11812	0.0160007	0.499841	up	yes
MSTRG.32050	Em0456g3a	Em0456g3a.t1	GO:0000049(tRNA binding);GO:0000166(nucleotide binding);GO:0002161(aminoacyl-tRNA editing activity);GO:0004812(aminoacyl-tRNA ligase activity);GO:0004822(isoleucine-tRNA ligase activity);GO:0005524(ATP binding);GO:0005737(cytoplasm);GO:0006412(translation);GO:0006418(tRNA aminoacylation for protein translation);GO:0006428(isoleucyl-tRNA aminoacylation);GO:0016874(ligase activity);GO:1903670(regul…	00970(Aminoacyl-tRNA biosynthesis)	K01870	EC:6.1.1.5	PREDICTED: isoleucine--tRNA ligase, cytoplasmic [Amphimedon queenslandica]	0.805182	0.908458	0.704673	0.650019	0.0654413	0.100653	2.96321	1.56716	0.0164956	0.506085	up	yes
MSTRG.31198	Em0145g1a	Em0145g1a.t1	NA	NA	NA	NA	PREDICTED: E3 ubiquitin-protein ligase Midline-1-like isoform X1 [Amphimedon queenslandica]	1.06389	0.4329	0.399898	1.4677	1.50754	1.1712	0.457426	-1.12839	0.0165791	0.506904	down	yes
MSTRG.19888	Em0015g184a	Em0015g184a.t1	NA	NA	NA	NA		1.55918	1.17123	2.29296	0.986067	0.914618	0.454033	2.13332	1.0931	0.0166689	0.507299	up	yes
MSTRG.7995	Em0004g1408a	Em0004g1408a.t1	GO:0004842(ubiquitin-protein transferase activity);GO:0005515(protein binding);GO:0005622(intracellular);GO:0005737(cytoplasm);GO:0008270(zinc ion binding);GO:0016567(protein ubiquitination);GO:0043523(regulation of neuron apoptotic process);GO:0061630(ubiquitin protein ligase activity);GO:1990830(cellular response to leukemia inhibitory factor)	NA	NA	NA	hypothetical protein BRAFLDRAFT_68030 [Branchiostoma floridae]	0.321061	0.438448	0.988011	0.074	0.312355	0.136804	3.34032	1.73999	0.0167507	0.507605	up	yes
MSTRG.16226	Em0011g484a	Em0011g484a.t1	GO:0005930(axoneme);GO:0036064(ciliary basal body);GO:0045504(dynein heavy chain binding)	NA	NA	NA	PREDICTED: cytoplasmic dynein 2 light intermediate chain 1-like [Saccoglossus kowalevskii]	1.41947	0.821543	2.13905	0.100415	0.719441	0.8025	2.69981	1.43286	0.0167559	0.507605	up	yes
Em0003g1027a	Em0003g1027a	Em0003g1027a.t1	GO:0004674(protein serine/threonine kinase activity);GO:0005634(nucleus);GO:0005737(cytoplasm);GO:0008360(regulation of cell shape);GO:0018105(peptidyl-serine phosphorylation)	NA	NA	NA	uncharacterized protein K02A2.6-like [Carassius auratus]	0.533861	0.5705	0.232979	0.865845	0.83049	1.14766	0.470232	-1.08855	0.0170226	0.511288	down	yes
MSTRG.23515	Em0018g725a;Em0018g726a	Em0018g725a.t1;Em0018g726a.t1	GO:0000302(response to reactive oxygen species);GO:0001016(RNA polymerase III regulatory region DNA binding);GO:0004601(peroxidase activity);GO:0005102(receptor binding);GO:0005615(extracellular space);GO:0005634(nucleus);GO:0005737(cytoplasm);GO:0005739(mitochondrion);GO:0005759(mitochondrial matrix);GO:0005777(peroxisome);GO:0005782(peroxisomal matrix);GO:0005829(cytosol);GO:0006954(inflammator…	04146(Peroxisome);04146(Peroxisome)	K11187	EC:1.11.1.15	peroxiredoxin-5, mitochondrial-like [Oncorhynchus kisutch];PREDICTED: peroxiredoxin-5, mitochondrial-like [Amphimedon queenslandica]	3.20845	1.04288	0.681571	3.96769	3.79348	3.67236	0.431441	-1.21276	0.0170326	0.511288	down	yes
MSTRG.32435	Em0685g3a	Em0685g3a.t1	NA	NA	NA	NA		0	0.33861	0	2.77966	0	2.69864	0.0618093	-4.01603	0.0178997	0.52868	down	yes
MSTRG.5221	Em0003g367a	Em0003g367a.t1	NA	NA	NA	NA	collagen alpha-1(I) chain-like, partial [Pipra filicauda]	8.67396	0.327778	0.577041	0.980517	0.732293	0.506956	4.31522	2.10943	0.017906	0.52868	up	yes
MSTRG.8595	Em0005g328a	Em0005g328a.t1	GO:0000002(mitochondrial genome maintenance);GO:0005634(nucleus);GO:0005657(replication fork);GO:0005739(mitochondrion);GO:0006260(DNA replication);GO:0010521(telomerase inhibitor activity);GO:0032211(negative regulation of telomere maintenance via telomerase);GO:0032508(DNA duplex unwinding);GO:0043141(ATP-dependent 5'-3' DNA helicase activity);GO:0044806(G-quadruplex DNA unwinding);GO:0051974(n…	NA	NA	NA	PREDICTED: uncharacterized protein LOC105314614, partial [Amphimedon queenslandica]	0.892275	0.248162	1.0023	0.251621	0.476067	0.192362	2.32893	1.21967	0.0182449	0.534822	up	yes
MSTRG.22424	Em0017g385a	Em0017g385a.t1	NA	NA	NA	NA		3.43586	1.55138	4.9891	7.41559	7.64974	5.62319	0.482216	-1.05225	0.0182492	0.534822	down	yes
MSTRG.8179	Em0004g1615a	Em0004g1615a.t1	GO:0000166(nucleotide binding);GO:0000902(cell morphogenesis);GO:0003924(GTPase activity);GO:0005525(GTP binding);GO:0005737(cytoplasm);GO:0005856(cytoskeleton);GO:0005886(plasma membrane);GO:0006897(endocytosis);GO:0006935(chemotaxis);GO:0007015(actin filament organization);GO:0007264(small GTPase mediated signal transduction);GO:0007266(Rho protein signal transduction);GO:0016477(cell migration…	04120(Ubiquitin mediated proteolysis)	K07868	NA	rho-related protein racA-like isoform X1 [Lingula anatina]	0.416082	0.300328	0.248901	0.704399	0.804912	0.62999	0.451227	-1.14807	0.0183671	0.536041	down	yes
MSTRG.17295	Em0011g1032a	Em0011g1032a.t1	GO:0004842(ubiquitin-protein transferase activity);GO:0005515(protein binding);GO:0016567(protein ubiquitination);GO:0046872(metal ion binding)	NA	NA	NA	hypothetical protein BRAFLDRAFT_80577 [Branchiostoma floridae]	1.74376	1.36454	1.43477	4.10786	2.62054	3.04942	0.46463	-1.10585	0.018372	0.536041	down	yes
MSTRG.3512	Em0002g498a	Em0002g498a.t1	NA	NA	NA	NA	PREDICTED: usherin-like [Amphimedon queenslandica]	1.10071	0.765901	0.384501	1.49879	1.24745	1.78124	0.497211	-1.00807	0.0185667	0.538982	down	yes
MSTRG.13982	Em0009g363a	Em0009g363a.t1	GO:0004842(ubiquitin-protein transferase activity);GO:0016740(transferase activity)	04120(Ubiquitin mediated proteolysis)	K10594	EC:2.3.2.26	PREDICTED: probable E3 ubiquitin-protein ligase HERC1 [Amphimedon queenslandica]	0.51523	0.605486	0.09384	0.918172	0.886763	1.46069	0.371921	-1.42693	0.0190882	0.548842	down	yes
MSTRG.21760	Em0016g889a	Em0016g889a.t1	NA	NA	NA	NA		8.34776	3.77505	9.09256	0.871997	4.96032	4.2548	2.10321	1.0726	0.0192606	0.552995	up	yes
Em0002g873a	Em0002g873a	Em0002g873a.t1	NA	NA	NA	NA		0.254244	0.43776	0.201494	0.659041	1.04378	0.582393	0.39099	-1.35479	0.0192953	0.553189	down	yes
MSTRG.27637	Em0022g462a	Em0022g462a.t1	GO:0004536(deoxyribonuclease activity);GO:0006308(DNA catabolic process)	03015(mRNA surveillance pathway)	K14401	NA	Transposon Ty3-I Gag-Pol polyprotein [Trichinella sp. T6]	0.264543	0.344364	0.397422	0.17111	0.060869	0.111809	2.92718	1.54951	0.0194641	0.556413	up	yes
MSTRG.17001	Em0012g346a	Em0012g346a.t1	NA	NA	NA	NA		0.60542	0.657392	0.751532	1.50014	1.88859	2.24554	0.357517	-1.48392	0.0195809	0.558497	down	yes
MSTRG.2984	Em0001g3190a	Em0001g3190a.t1	NA	NA	NA	NA		1.03329	0.575101	3.21362	0.520714	0.533001	0.764023	2.65275	1.40749	0.0198524	0.564254	up	yes
MSTRG.31216	Em0148g9a	Em0148g9a.t1	NA	NA	NA	NA	wings apart-like protein homolog isoform X2 [Mizuhopecten yessoensis]	0.699417	0.587502	0.786021	0.479892	0.071668	0.089585	3.23318	1.69296	0.0202662	0.572722	up	yes
MSTRG.30820	Em0096g9a	Em0096g9a.t1	GO:0005783(endoplasmic reticulum)	NA	NA	NA	PREDICTED: multiple C2 and transmembrane domain-containing protein 2-like isoform X1 [Amphimedon queenslandica]	0.517929	0.475355	0.286423	1.04303	0.749986	0.966846	0.463684	-1.10878	0.0203874	0.575326	down	yes
MSTRG.7165	Em0004g542a	Em0004g542a.t1	GO:0004842(ubiquitin-protein transferase activity);GO:0005515(protein binding);GO:0005622(intracellular);GO:0005737(cytoplasm);GO:0008270(zinc ion binding);GO:0016567(protein ubiquitination);GO:0043523(regulation of neuron apoptotic process);GO:0061630(ubiquitin protein ligase activity);GO:1990830(cellular response to leukemia inhibitory factor)	NA	NA	NA	PREDICTED: E3 ubiquitin-protein ligase TRIM71-like [Amphimedon queenslandica]	0.545502	0.419677	0.247579	1.33627	0.694267	0.780876	0.43137	-1.213	0.020548	0.579032	down	yes
MSTRG.7242	Em0004g662a	Em0004g662a.t1	GO:0004222(metalloendopeptidase activity);GO:0006509(membrane protein ectodomain proteolysis);GO:0008593(regulation of Notch signaling pathway);GO:0016021(integral component of membrane)	04330(Notch signaling pathway)	K06059	EC:3.4.24.86	PREDICTED: disintegrin and metalloproteinase domain-containing protein 17-like [Amphimedon queenslandica]	0.615096	0.298329	0.500583	0.153034	0.175408	0.109485	3.22886	1.69102	0.021299	0.593432	up	yes
Em0024g356a	Em0024g356a	Em0024g356a.t1	GO:0004536(deoxyribonuclease activity);GO:0006308(DNA catabolic process)	04144(Endocytosis)	K11826	NA	Retrovirus-related Pol polyprotein from transposon [Trichinella sp. T9]	0.730653	0.535962	1.06535	0.497519	0.299141	0.178476	2.39142	1.25787	0.021463	0.596323	up	yes
MSTRG.30992	Em0115g10a	Em0115g10a.t1	GO:0004004(ATP-dependent RNA helicase activity);GO:0010501(RNA secondary structure unwinding)	NA	NA	NA	PREDICTED: probable ATP-dependent RNA helicase DDX27 [Amphimedon queenslandica]	0.568688	0.235477	0.139649	0.319691	1.12228	1.23334	0.352787	-1.50313	0.0216149	0.59886	down	yes
MSTRG.30147	Em0044g11a	Em0044g11a.t1	NA	NA	NA	NA	PREDICTED: uncharacterized protein LOC109587260, partial [Amphimedon queenslandica]	0.499457	0.241571	0.217271	0.718444	0.946715	0.64241	0.415285	-1.26783	0.0222273	0.609005	down	yes
MSTRG.16708	Em0011g1009a	Em0011g1009a.t1	GO:0005634(nucleus);GO:0005667(transcription factor complex);GO:0005737(cytoplasm);GO:0009266(response to temperature stimulus);GO:0009416(response to light stimulus);GO:0045892(negative regulation of transcription, DNA-templated)	NA	NA	NA	cryptochrome [Suberites domuncula]	1.79039	2.43278	3.27902	1.90359	0.333398	0.773629	2.49191	1.31725	0.022367	0.610296	up	yes
MSTRG.21419	Em0016g437a	Em0016g437a.t1	GO:0004672(protein kinase activity);GO:0005737(cytoplasm);GO:0007165(signal transduction)	NA	NA	NA	PREDICTED: probable serine/threonine-protein kinase drkD [Amphimedon queenslandica]	0.618875	0.425553	0.609923	1.08747	1.03003	1.45877	0.462592	-1.11219	0.0226131	0.612004	down	yes
MSTRG.4298	Em0002g1424a;Em0002g1416a	Em0002g1424a.t1;Em0002g1416a.t1	NA	NA	NA	NA	PREDICTED: uncharacterized protein LOC109588230 [Amphimedon queenslandica]	0.748227	0.31053	1.00149	0.343179	0.211601	0.434211	2.08318	1.05879	0.0226153	0.612004	up	yes
MSTRG.31634	Em0251g2a	Em0251g2a.t1	NA	NA	NA	NA		2.33207	1.51197	6.37065	1.98659	1.55997	1.23325	2.13705	1.09562	0.0227794	0.615603	up	yes
MSTRG.10372	Em0006g748a	Em0006g748a.t1	GO:0005794(Golgi apparatus);GO:0005886(plasma membrane);GO:0009615(response to virus);GO:0016021(integral component of membrane);GO:0030643(cellular phosphate ion homeostasis)	NA	NA	NA	PREDICTED: phosphate transporter PHO1 homolog 1-like [Amphimedon queenslandica]	1.17812	0.633393	0.627595	1.55559	1.42358	2.04806	0.48518	-1.04341	0.0235398	0.630982	down	yes
MSTRG.26333	Em0021g192a;Em0021g178a	Em0021g192a.t1;Em0021g178a.t1	GO:0004222(metalloendopeptidase activity);GO:0006508(proteolysis);GO:0007229(integrin-mediated signaling pathway);GO:0008270(zinc ion binding);GO:0008270(zinc ion binding)	NA	NA	NA	PREDICTED: zinc metalloproteinase-disintegrin-like ohanin [Phalacrocorax carbo];PREDICTED: disintegrin and metalloproteinase domain-containing protein 28-like [Amphimedon queenslandica]	1.65562	1.26341	6.57877	1.13775	2.03373	1.407	2.07444	1.05272	0.0236008	0.631109	up	yes
MSTRG.32567	Em0777g3a	Em0777g3a.t1	GO:0004842(ubiquitin-protein transferase activity);GO:0016567(protein ubiquitination);GO:0016874(ligase activity)	NA	NA	NA	Hace1 protein, partial [Mus musculus]	0.959768	0.914222	0.808483	1.45582	1.3767	2.53458	0.4998	-1.00058	0.0239309	0.635437	down	yes
MSTRG.10267	Em0006g417a	Em0006g417a.t1	NA	NA	NA	NA		0.797924	2.04412	1.0371	2.80218	3.81171	2.1603	0.442109	-1.17753	0.0241019	0.635961	down	yes
MSTRG.32064	Em0464g3a	Em0464g3a.t1	GO:0005741(mitochondrial outer membrane);GO:0035694(mitochondrial protein catabolic process);GO:0035695(mitophagy by induced vacuole formation)	NA	NA	NA	PREDICTED: uncharacterized protein LOC109593765 [Amphimedon queenslandica]	0	0.465287	0	1.38804	0.783175	1.06636	0.143715	-2.79872	0.0243234	0.639848	down	yes
MSTRG.19411	Em0014g704a	Em0014g704a.t1	GO:0000712(resolution of meiotic recombination intermediates);GO:0003697(single-stranded DNA binding);GO:0008310(single-stranded DNA 3'-5' exodeoxyribonuclease activity);GO:0090305(nucleic acid phosphodiester bond hydrolysis)	03420(Nucleotide excision repair);03460(Fanconi anemia pathway)	K10848	EC:3.1.-.-	PREDICTED: uncharacterized protein LOC100639084, partial [Amphimedon queenslandica]	0.627592	0.102305	0.164064	0.069683	0.126042	0.089008	3.13965	1.6506	0.0244169	0.640352	up	yes
MSTRG.25691	Em0020g449a	Em0020g449a.t1	NA	NA	NA	NA		0.613651	0.486684	0.504378	0.091029	0.203816	0.279303	2.79495	1.48282	0.0246183	0.643804	up	yes
MSTRG.1314	Em0001g1543a	Em0001g1543a.t1	NA	NA	NA	NA		1.36861	0.855811	0.897534	0.66403	0.257279	0.251964	2.66089	1.41191	0.0246365	0.643804	up	yes
MSTRG.3737	Em0002g833a	Em0002g833a.t1	GO:0009408(response to heat);GO:0009409(response to cold)	03040(Spliceosome);04141(Protein processing in endoplasmic reticulum);04010(MAPK signaling pathway);04144(Endocytosis);05164(Influenza A)	K03283	NA	Heat shock 70 kDa protein [Podiceps cristatus]	0.954169	0.504784	0.451709	0.709934	1.46416	2.191	0.437714	-1.19194	0.0248857	0.647444	down	yes
MSTRG.32610	Em0799g3a	Em0799g3a.t1	GO:0004497(monooxygenase activity);GO:0005506(iron ion binding);GO:0016020(membrane);GO:0016021(integral component of membrane);GO:0016491(oxidoreductase activity);GO:0016705(oxidoreductase activity, acting on paired donors, with incorporation or reduction of molecular oxygen);GO:0020037(heme binding);GO:0046872(metal ion binding);GO:0055114(oxidation-reduction process)	NA	NA	NA	PREDICTED: cytochrome P450 4F1-like [Amphimedon queenslandica]	11.5454	9.27667	6.22378	0.618929	7.61125	2.65669	2.48426	1.31282	0.0249067	0.647444	up	yes
Em0002g484a	Em0002g484a	Em0002g484a.t1	GO:0000719(photoreactive repair);GO:0003904(deoxyribodipyrimidine photo-lyase activity)	NA	NA	NA	uncharacterized protein LOC112841841 [Oreochromis niloticus]	0.071527	0.051368	0.022056	0.281328	0.261844	0.049883	0.244414	-2.0326	0.0250837	0.647945	down	yes
MSTRG.1399	Em0001g1698a;Em0001g1702a	Em0001g1698a.t1;Em0001g1702a.t1	GO:0002221(pattern recognition receptor signaling pathway);GO:0005044(scavenger receptor activity);GO:0005515(protein binding);GO:0005576(extracellular region);GO:0005615(extracellular space);GO:0005737(cytoplasm);GO:0006898(receptor-mediated endocytosis);GO:0007275(multicellular organism development);GO:0008329(signaling pattern recognition receptor activity);GO:0015031(protein transport);GO:001…	04970(Salivary secretion);04970(Salivary secretion)	K13912	NA	deleted in malignant brain tumors 1 protein-like [Pelodiscus sinensis];deleted in malignant brain tumors 1 protein-like isoform X1 [Acanthaster planci]	0.291125	0.362009	0.271882	0.937984	0.531253	0.443166	0.483693	-1.04784	0.0250898	0.647945	down	yes
MSTRG.4336	Em0002g1449a	Em0002g1449a.t1	GO:0004674(protein serine/threonine kinase activity);GO:0005886(plasma membrane);GO:0006468(protein phosphorylation);GO:0006952(defense response);GO:0009506(plasmodesma)	NA	NA	NA	PREDICTED: receptor-like kinase LIP2 [Amphimedon queenslandica]	1.77411	2.37378	0.506546	3.23111	3.72523	2.80269	0.476936	-1.06813	0.0251273	0.648069	down	yes
MSTRG.12747	Em0008g188a	Em0008g188a.t1	NA	NA	NA	NA		0.918488	1.11929	1.38982	0.278871	0.501793	0.557542	2.56134	1.3569	0.0252125	0.649418	up	yes
MSTRG.24824	Em0019g936a	Em0019g936a.t1	NA	NA	NA	NA		1.80672	0.138105	0.500689	2.93257	1.33824	2.95247	0.33856	-1.56252	0.0255414	0.653878	down	yes
MSTRG.31679	Em0274g3a	Em0274g3a.t1	GO:0003674(molecular_function);GO:0004842(ubiquitin-protein transferase activity);GO:0005575(cellular_component);GO:0006511(ubiquitin-dependent protein catabolic process);GO:0008150(biological_process)	NA	NA	NA	PREDICTED: uncharacterized protein LOC100640736 [Amphimedon queenslandica]	0.459394	0.138098	0.234119	0.117823	0.146308	0.112355	2.20888	1.14332	0.0259152	0.661296	up	yes
MSTRG.30716	Em0084g5a	Em0084g5a.t1	GO:0006915(apoptotic process);GO:0097153(cysteine-type endopeptidase activity involved in apoptotic process);GO:0097194(execution phase of apoptosis);GO:0097342(ripoptosome)	04668(TNF signaling pathway);04210(Apoptosis);04215(Apoptosis - multiple species);04217(Necroptosis);04115(p53 signaling pathway);04620(Toll-like receptor signaling pathway);04621(NOD-like receptor signaling pathway);04622(RIG-I-like receptor signaling pathway);04625(C-type lectin receptor signaling pathway);04657(IL-17 signaling pathway);05200(Pathways in cancer);05203(Viral carcinogenesis);0501…	K04398	EC:3.4.22.61	PREDICTED: uncharacterized protein LOC109590300 [Amphimedon queenslandica]	0.325538	0.202262	0.110698	0.445585	0.53029	0.548935	0.418739	-1.25588	0.0259689	0.661296	down	yes
MSTRG.17699	Em0012g870a	Em0012g870a.t1	NA	NA	NA	NA		1.15311	0.685072	0.963377	0.386746	0.463312	0.544206	2.00935	1.00673	0.0264527	0.664069	up	yes
MSTRG.491	Em0001g601a	Em0001g601a.t1	NA	NA	NA	NA		0.359357	0.42395	0.2955	1.54803	0.810957	0.727061	0.349576	-1.51632	0.026953	0.674063	down	yes
MSTRG.1490	Em0001g1786a	Em0001g1786a.t1	GO:0004536(deoxyribonuclease activity);GO:0006308(DNA catabolic process)	NA	NA	NA	PREDICTED: putative deoxyribonuclease TATDN2 [Acropora digitifera]	2.30738	0.970148	0.69224	2.19221	3.32668	3.00034	0.465977	-1.10167	0.0271778	0.676265	down	yes
MSTRG.9828	Em0006g232a	Em0006g232a.t1	NA	NA	NA	NA		0.994994	1.0506	0.518814	1.79727	1.4721	1.89491	0.496567	-1.00994	0.0272259	0.676611	down	yes
MSTRG.32352	Em0628g2a	Em0628g2a.t1	GO:0005839(proteasome core complex)	03050(Proteasome)	K02726	EC:3.4.25.1	proteasome subunit alpha 2, partial [Halichondria panicea]	0.40148	0.672428	0.134423	1.95496	0	6.15452	0.149002	-2.74659	0.0274336	0.680919	down	yes
MSTRG.8435	Em0005g239a	Em0005g239a.t1	GO:0000221(vacuolar proton-transporting V-type ATPase, V1 domain);GO:0005765(lysosomal membrane);GO:0005886(plasma membrane);GO:0007035(vacuolar acidification);GO:0008340(determination of adult lifespan);GO:0015991(ATP hydrolysis coupled proton transport);GO:0033181(plasma membrane proton-transporting V-type ATPase complex);GO:0033227(dsRNA transport);GO:0046961(proton-transporting ATPase activit…	00190(Oxidative phosphorylation);04150(mTOR signaling pathway);04145(Phagosome);04142(Lysosome)	K02144	NA	PREDICTED: V-type proton ATPase subunit H-like [Amphimedon queenslandica]	0.0822743	0	2.99466	5.24586	8.0823	7.69626	0.146351	-2.7725	0.0275355	0.682474	down	yes
Em0024g286a	Em0024g286a	Em0024g286a.t1	NA	NA	NA	NA	Retrovirus-related Pol polyprotein from transposon 412, partial [Exaiptasia pallida]	0.255111	0.090454	0.319983	0.892575	0.488994	1.06667	0.271848	-1.87913	0.0277373	0.683884	down	yes
MSTRG.960	Em0001g1138a	Em0001g1138a.t1	GO:0030374(ligand-dependent nuclear receptor transcription coactivator activity);GO:0046872(metal ion binding)	03013(RNA transport);03015(mRNA surveillance pathway)	K14326	EC:3.6.4.-	PREDICTED: helicase with zinc finger domain 2-like, partial [Amphimedon queenslandica]	0.12185	0.041691	0.113079	0.129156	0.374074	0.446218	0.291348	-1.77918	0.0278211	0.683884	down	yes
MSTRG.20537	Em0015g881a	Em0015g881a.t1	NA	00360(Phenylalanine metabolism);00400(Phenylalanine, tyrosine and tryptophan biosynthesis);00790(Folate biosynthesis)	K00500	EC:1.14.16.1	PREDICTED: uncharacterized protein LOC102802303 [Saccoglossus kowalevskii]	0	0.155854	0	0.213638	0.199279	0.791746	0.129375	-2.95037	0.0278297	0.683884	down	yes
MSTRG.18696	Em0013g984a	Em0013g984a.t1	GO:0000166(nucleotide binding);GO:0000281(mitotic cytokinesis);GO:0000331(contractile vacuole);GO:0004672(protein kinase activity);GO:0004674(protein serine/threonine kinase activity);GO:0005516(calmodulin binding);GO:0005524(ATP binding);GO:0005737(cytoplasm);GO:0005773(vacuole);GO:0005826(actomyosin contractile ring);GO:0005829(cytosol);GO:0006468(protein phosphorylation);GO:0006971(hypotonic r…	NA	NA	NA	PREDICTED: alpha-protein kinase vwkA-like [Amphimedon queenslandica]	0.504761	0.592885	0.838192	1.36995	1.15603	2.08514	0.41982	-1.25216	0.0284282	0.690708	down	yes
MSTRG.22506	Em0017g461a	Em0017g461a.t1	GO:0000027(ribosomal large subunit assembly);GO:0003674(molecular_function);GO:0005575(cellular_component);GO:0005634(nucleus);GO:0005656(nuclear pre-replicative complex);GO:0006267(pre-replicative complex assembly involved in nuclear cell cycle DNA replication);GO:0006364(rRNA processing);GO:0008150(biological_process);GO:0030174(regulation of DNA-dependent DNA replication initiation);GO:0097344…	04120(Ubiquitin mediated proteolysis)	K10260	NA	predicted protein [Nematostella vectensis]	0.318121	0.215905	0.407433	0.613926	0.683309	0.75119	0.459601	-1.12154	0.0284691	0.690708	down	yes
MSTRG.26220	Em0021g66a	Em0021g66a.t1	NA	NA	NA	NA	PREDICTED: uncharacterized protein LOC109586208 [Amphimedon queenslandica]	0.13448	0.269672	0.177227	0.258031	0.678359	0.905522	0.315639	-1.66365	0.0287261	0.693846	down	yes
MSTRG.2219	Em0001g2715a	Em0001g2715a.t1	NA	NA	NA	NA		0.253481	0.255495	0.320036	0.508899	1.06623	0.652029	0.372228	-1.42574	0.0291837	0.700793	down	yes
MSTRG.32678	Em0867g3a	Em0867g3a.t1	NA	NA	NA	NA	PREDICTED: triple functional domain protein-like [Amphimedon queenslandica]	0.465943	1.18742	0.31376	0	0.160647	0.300175	4.26873	2.09381	0.0294158	0.703562	up	yes
MSTRG.16619	Em0011g952a	Em0011g952a.t1	NA	NA	NA	NA		0.197788	0.0258754	0.153183	1.23185	0	1.51253	0.137315	-2.86443	0.0294485	0.703562	down	yes
Em0312g2a	Em0312g2a	Em0312g2a.t1	GO:0004930(G-protein coupled receptor activity);GO:0005886(plasma membrane);GO:0005887(integral component of plasma membrane);GO:0007165(signal transduction);GO:0007186(G-protein coupled receptor signaling pathway);GO:0007196(adenylate cyclase-inhibiting G-protein coupled glutamate receptor signaling pathway);GO:0008066(glutamate receptor activity);GO:0014069(postsynaptic density);GO:0016020(memb…	04080(Neuroactive ligand-receptor interaction)	K04605	NA	PREDICTED: metabotropic glutamate receptor-like [Amphimedon queenslandica]	0.31266	0.109288	0.276057	0.673815	0.472658	0.545483	0.412543	-1.27738	0.0295764	0.704857	down	yes
MSTRG.11454	Em0007g497a	Em0007g497a.t1	NA	NA	NA	NA	PREDICTED: uncharacterized protein LOC109582657 [Amphimedon queenslandica]	1.62603	1.04878	1.25238	0.649492	0.472511	0.803821	2.03922	1.02802	0.0297005	0.704857	up	yes
MSTRG.14893	Em0010g29a	Em0010g29a.t1	GO:0004222(metalloendopeptidase activity);GO:0005737(cytoplasm);GO:0005925(focal adhesion);GO:0006508(proteolysis);GO:0007155(cell adhesion);GO:0016021(integral component of membrane)	NA	NA	NA	PREDICTED: leishmanolysin-like peptidase [Amphimedon queenslandica]	0.573854	0.600944	0.321811	0.695339	0.902155	1.61361	0.466072	-1.10137	0.0298951	0.704857	down	yes
Em0015g1062a	Em0015g1062a	Em0015g1062a.t1	GO:0003700(DNA binding transcription factor activity);GO:0005634(nucleus);GO:0006355(regulation of transcription, DNA-templated);GO:0008270(zinc ion binding)	03040(Spliceosome)	K12874	NA	PREDICTED: NFX1-type zinc finger-containing protein 1-like [Amphimedon queenslandica]	0.0675	0.121982	0.075231	0.2353	0.141903	0.28342	0.400702	-1.3194	0.0300036	0.704857	down	yes
MSTRG.14568	Em0009g1058a	Em0009g1058a.t1	GO:0000977(RNA polymerase II regulatory region sequence-specific DNA binding);GO:0001228(transcriptional activator activity, RNA polymerase II transcription regulatory region sequence-specific DNA binding);GO:0005634(nucleus);GO:0006357(regulation of transcription by RNA polymerase II);GO:0007399(nervous system development);GO:0009888(tissue development);GO:0048513(animal organ development)	NA	NA	NA	PREDICTED: homeobox protein ceh-30-like isoform X1 [Crassostrea gigas]	0.704278	2.2675	0.446749	2.16278	2.87338	3.5997	0.395853	-1.33696	0.0302176	0.704857	down	yes
MSTRG.3249	Em0001g3735a	Em0001g3735a.t1	NA	NA	NA	NA		0.944612	1.26833	0.737008	1.74028	1.61574	2.69709	0.487345	-1.03698	0.0302809	0.704857	down	yes
Em0045g9a	Em0045g9a	Em0045g9a.t1	GO:0000082(G1/S transition of mitotic cell cycle);GO:0000932(P-body);GO:0003723(RNA binding);GO:0004842(ubiquitin-protein transferase activity);GO:0005622(intracellular);GO:0005737(cytoplasm);GO:0007275(multicellular organism development);GO:0008270(zinc ion binding);GO:0008543(fibroblast growth factor receptor signaling pathway);GO:0010172(embryonic body morphogenesis);GO:0010586(miRNA metabolic…	NA	NA	NA	PREDICTED: E3 ubiquitin-protein ligase TRIM71-like [Amphimedon queenslandica]	0.242447	0.368048	0.289998	0.704666	0.723168	0.563388	0.452231	-1.14487	0.0303578	0.704857	down	yes
MSTRG.22988	Em0018g107a	Em0018g107a.t1	GO:0005643(nuclear pore);GO:0006606(protein import into nucleus);GO:0016973(poly(A)+ mRNA export from nucleus);GO:0017056(structural constituent of nuclear pore);GO:0051292(nuclear pore complex assembly)	03013(RNA transport)	K14309	NA	nuclear pore complex protein Nup93-like [Exaiptasia pallida]	0	0	0.449185	4.71287	0	3.57501	0.0541978	-4.20562	0.0309209	0.71291	down	yes
Em0067g15a	Em0067g15a	Em0067g15a.t1	GO:0004536(deoxyribonuclease activity);GO:0006308(DNA catabolic process)	NA	NA	NA	uncharacterized protein LOC113037671 [Carassius auratus]	0.253142	0.174361	0.202904	0.432032	0.396449	0.465715	0.487103	-1.0377	0.0318715	0.724933	down	yes
MSTRG.31851	Em0360g3a	Em0360g3a.t1	GO:0009082(branched-chain amino acid biosynthetic process);GO:0052654(L-leucine transaminase activity);GO:0052655(L-valine transaminase activity);GO:0052656(L-isoleucine transaminase activity)	00270(Cysteine and methionine metabolism);00280(Valine, leucine and isoleucine degradation);00290(Valine, leucine and isoleucine biosynthesis);00770(Pantothenate and CoA biosynthesis)	K00826	EC:2.6.1.42	PREDICTED: branched-chain-amino-acid aminotransferase, cytosolic-like [Amphimedon queenslandica]	0.560394	0.42498	1.45681	3.20969	1.73571	1.01618	0.409654	-1.28752	0.0319956	0.725014	down	yes
MSTRG.11480	Em0007g540a	Em0007g540a.t1	GO:0004536(deoxyribonuclease activity);GO:0006308(DNA catabolic process)	NA	NA	NA	uncharacterized protein K02A2.6-like [Astatotilapia calliptera]	0.077905	0.092281	0.138712	0.180709	0.28525	0.452091	0.336472	-1.57144	0.0322413	0.726379	down	yes
Em0013g810a	Em0013g810a	Em0013g810a.t1	NA	NA	NA	NA	hypothetical protein pdam_00014232 [Pocillopora damicornis]	0.372191	0.450734	0.495948	0.788666	1.10931	1.10824	0.438715	-1.18864	0.0322495	0.726379	down	yes
MSTRG.4660	Em0002g1781a	Em0002g1781a.t1	GO:0000719(photoreactive repair);GO:0003904(deoxyribodipyrimidine photo-lyase activity)	NA	NA	NA	uncharacterized protein LOC113009615 [Astatotilapia calliptera]	1.562	1.66645	0.026429	0.207672	0.448688	0.243956	3.61527	1.8541	0.0322762	0.726379	up	yes
MSTRG.2161	Em0001g2739a	Em0001g2739a.t1	GO:0005634(nucleus);GO:0005737(cytoplasm)	03320(PPAR signaling pathway)	K08770	NA	PREDICTED: LOW QUALITY PROTEIN: polyubiquitin-C-like [Aethina tumida]	0.43432	1.30345	0.507712	0.273355	0.349854	0.467084	2.05952	1.04231	0.032425	0.727252	up	yes
MSTRG.7975	Em0004g1389a	Em0004g1389a.t1	NA	04142(Lysosome)	K01158	EC:3.1.22.1	deoxyribonuclease-2-alpha-like isoform X1 [Eurytemora affinis]	3.94897	5.13979	4.30719	3.47591	2.31467	0.485131	2.13457	1.09395	0.0326952	0.729585	up	yes
MSTRG.31361	Em0180g1a	Em0180g1a.t1	GO:0005415(nucleoside:sodium symporter activity);GO:0005887(integral component of plasma membrane)	NA	NA	NA	Transposon Ty3-I Gag-Pol polyprotein [Trichinella zimbabwensis]	0.102032	0.05144	0.083339	0.378035	0.25008	0.100876	0.324848	-1.62216	0.0327341	0.729585	down	yes
MSTRG.10462	Em0006g665a	Em0006g665a.t1	NA	NA	NA	NA	PREDICTED: uncharacterized protein LOC109590400 [Amphimedon queenslandica]	0.297515	0.536675	0.189954	0.605591	0.81843	0.996486	0.423111	-1.24089	0.032747	0.729585	down	yes
MSTRG.18540	Em0013g767a	Em0013g767a.t1	GO:0005575(cellular_component)	00900(Terpenoid backbone biosynthesis);00981(Insect hormone biosynthesis)	K15890	EC:1.1.1.216	dehydrogenase/reductase SDR family member 11-like [Acanthochromis polyacanthus]	0.776821	0.484804	0.599939	1.51311	1.61827	1.0117	0.449319	-1.15419	0.0331267	0.73441	down	yes
MSTRG.31965	Em0419g5a	Em0419g5a.t1	NA	NA	NA	NA		0.301549	0.440097	0.481376	0.780733	0.754899	0.918649	0.498322	-1.00485	0.0332641	0.73441	down	yes
MSTRG.23581	Em0018g862a	Em0018g862a.t1	GO:0000731(DNA synthesis involved in DNA repair);GO:0000781(chromosome, telomeric region);GO:0003677(DNA binding);GO:0005524(ATP binding);GO:0005634(nucleus);GO:0006260(DNA replication);GO:0016020(membrane);GO:0016887(ATPase activity);GO:0030174(regulation of DNA-dependent DNA replication initiation);GO:0042802(identical protein binding);GO:0048471(perinuclear region of cytoplasm)	NA	NA	NA	ATPase WRNIP1-like [Orbicella faveolata]	0.201616	0.343752	0.296587	0.774861	0.701589	0.52811	0.42002	-1.25147	0.0337207	0.739537	down	yes
MSTRG.30005	Em0036g29a	Em0036g29a.t1	GO:0000002(mitochondrial genome maintenance);GO:0005634(nucleus);GO:0005657(replication fork);GO:0005739(mitochondrion);GO:0006260(DNA replication);GO:0010521(telomerase inhibitor activity);GO:0032211(negative regulation of telomere maintenance via telomerase);GO:0032508(DNA duplex unwinding);GO:0043141(ATP-dependent 5'-3' DNA helicase activity);GO:0044806(G-quadruplex DNA unwinding);GO:0051974(n…	NA	NA	NA	PREDICTED: uncharacterized protein LOC105314614, partial [Amphimedon queenslandica]	0.67925	0.17238	0.870964	1.71746	1.53681	0.653423	0.440822	-1.18173	0.0339004	0.741833	down	yes
MSTRG.16817	Em0012g148a	Em0012g148a.t1	NA	NA	NA	NA	PREDICTED: uncharacterized protein LOC109584386 [Amphimedon queenslandica]	4.02262	2.75058	1.82231	1.45867	2.11455	0.327954	2.20332	1.13968	0.0343993	0.747854	up	yes
MSTRG.9826	Em0006g231a	Em0006g231a.t1	NA	NA	NA	NA		0.583832	0.837953	0.133014	1.11145	1.48149	1.36118	0.393209	-1.34663	0.0348477	0.75422	down	yes
MSTRG.19602	Em0014g819a	Em0014g819a.t1	GO:0005337(nucleoside transmembrane transporter activity);GO:0005765(lysosomal membrane);GO:0016021(integral component of membrane);GO:0031902(late endosome membrane);GO:1901642(nucleoside transmembrane transport)	NA	NA	NA	equilibrative nucleoside transporter 3-like [Mizuhopecten yessoensis]	3.83844	4.17108	5.28696	1.609	3.56115	0.349511	2.40893	1.26839	0.035077	0.7567	up	yes
MSTRG.30571	Em0069g5a	Em0069g5a.t1	NA	NA	NA	NA	PREDICTED: uncharacterized protein LOC109580472 [Amphimedon queenslandica]	0.957341	0.37639	1.23451	2.13163	1.53334	1.98282	0.454733	-1.13691	0.0353011	0.757404	down	yes
MSTRG.8852	Em0005g750a	Em0005g750a.t1	NA	NA	NA	NA	PREDICTED: uncharacterized protein LOC105380103 [Plutella xylostella]	0.10466	0.085189	0.137618	0.543613	0.371426	0.099331	0.322828	-1.63116	0.0355254	0.759615	down	yes
MSTRG.15534	Em0010g573a	Em0010g573a.t1	GO:0004674(protein serine/threonine kinase activity);GO:0005634(nucleus);GO:0005737(cytoplasm);GO:0008360(regulation of cell shape);GO:0018105(peptidyl-serine phosphorylation)	NA	NA	NA	uncharacterized protein K02A2.6-like, partial [Oryzias melastigma]	0.226268	0.305255	0.185512	0.101149	0.141074	0.112855	2.01937	1.01391	0.035779	0.761873	up	yes
MSTRG.16470	Em0011g701a	Em0011g701a.t1	GO:0001709(cell fate determination);GO:0004709(MAP kinase kinase kinase activity);GO:0004713(protein tyrosine kinase activity);GO:0004714(transmembrane receptor protein tyrosine kinase activity);GO:0004888(transmembrane signaling receptor activity);GO:0005524(ATP binding);GO:0005737(cytoplasm);GO:0005886(plasma membrane);GO:0005887(integral component of plasma membrane);GO:0006355(regulation of t…	NA	NA	NA	PREDICTED: ephrin type-A receptor 4a-like [Amphimedon queenslandica]	0.514438	0.36645	0.571795	0.91344	1.16439	0.852586	0.495725	-1.01239	0.0359658	0.765027	down	yes
MSTRG.22101	Em0016g1160a;Em0016g1157a	Em0016g1160a.t1;Em0016g1157a.t1	NA	NA	NA	NA		0.492215	0.571986	2.85996	3.06947	2.97175	3.17024	0.426009	-1.23105	0.0362193	0.768766	down	yes
MSTRG.23599	Em0018g779a	Em0018g779a.t1	GO:0000166(nucleotide binding);GO:0003924(GTPase activity);GO:0005200(structural constituent of cytoskeleton);GO:0005525(GTP binding);GO:0005737(cytoplasm);GO:0005856(cytoskeleton);GO:0005874(microtubule);GO:0007017(microtubule-based process)	04145(Phagosome);04210(Apoptosis);04530(Tight junction);04540(Gap junction)	K07374	NA	PREDICTED: uncharacterized protein LOC100637172, partial [Amphimedon queenslandica]	0.273683	0.30021	0.121011	0.590485	0.377406	0.631705	0.434425	-1.20282	0.0369198	0.778542	down	yes
MSTRG.9451	Em0005g1306a	Em0005g1306a.t1	GO:0003677(DNA binding);GO:0003689(DNA clamp loader activity);GO:0005524(ATP binding);GO:0005634(nucleus);GO:0005654(nucleoplasm);GO:0005663(DNA replication factor C complex);GO:0006260(DNA replication);GO:0006281(DNA repair);GO:0070062(extracellular exosome)	03030(DNA replication);03420(Nucleotide excision repair);03430(Mismatch repair)	K10754	NA	replication factor C subunit 1 isoform X2 [Rhincodon typus]	0.141371	0.389483	0	0.582317	0.6546	0.684647	0.276261	-1.85589	0.0372607	0.781644	down	yes
MSTRG.16649	Em0011g975a	Em0011g975a.t1	NA	NA	NA	NA	PREDICTED: coiled-coil domain-containing protein 171-like [Ornithorhynchus anatinus]	0.533834	0.389624	0.2298	0.897436	0.929941	0.518496	0.491611	-1.02441	0.038469	0.792097	down	yes
MSTRG.8325	Em0005g114a	Em0005g114a.t1	GO:0004502(kynurenine 3-monooxygenase activity);GO:0016174(NAD(P)H oxidase activity);GO:0019674(NAD metabolic process);GO:0044550(secondary metabolite biosynthetic process);GO:0050660(flavin adenine dinucleotide binding);GO:0070189(kynurenine metabolic process)	00380(Tryptophan metabolism)	K00486	EC:1.14.13.9	PREDICTED: kynurenine 3-monooxygenase [Orycteropus afer afer]	2.23945	1.52233	1.29601	0.312097	0.529749	1.57363	2.09391	1.0662	0.0385318	0.792097	up	yes
MSTRG.13923	Em0009g304a	Em0009g304a.t1	GO:0000790(nuclear chromatin);GO:0003677(DNA binding);GO:0006342(chromatin silencing)	NA	NA	NA	histone H2A-like [Acanthaster planci]	0.518198	1.46778	0.872948	1.38453	1.75708	2.82878	0.478852	-1.06235	0.0385439	0.792097	down	yes
MSTRG.31864	Em0370g2a	Em0370g2a.t1	NA	NA	NA	NA		1.88259	1.61841	6.53864	2.04459	1.58903	1.33428	2.0209	1.015	0.0388401	0.792097	up	yes
MSTRG.5375	Em0003g585a	Em0003g585a.t1	NA	NA	NA	NA		0.14404	0.248325	0.462246	1.65378	0.268588	0.779767	0.316272	-1.66076	0.0390681	0.795109	down	yes
MSTRG.24457	Em0019g587a	Em0019g587a.t1	GO:0003777(microtubule motor activity);GO:0005871(kinesin complex);GO:0007018(microtubule-based movement);GO:0016887(ATPase activity)	NA	NA	NA	PREDICTED: kinesin-like protein KIF6 isoform X4 [Chlorocebus sabaeus]	0.258556	0.211349	0.220105	0.143203	0.875715	0.737608	0.392827	-1.34804	0.0393277	0.797449	down	yes
MSTRG.165	Em0001g194a	Em0001g194a.t1	GO:0003887(DNA-directed DNA polymerase activity);GO:0003964(RNA-directed DNA polymerase activity);GO:0004190(aspartic-type endopeptidase activity);GO:0005575(cellular_component);GO:0006310(DNA recombination);GO:0015074(DNA integration);GO:0046872(metal ion binding)	NA	NA	NA	uncharacterized protein K02A2.6-like [Onthophagus taurus]	0.584392	0.49546	0.570019	0.069366	0.177575	0.516405	2.16137	1.11194	0.0397645	0.798599	up	yes
Em0008g418a	Em0008g418a	Em0008g418a.t1	GO:0004843(thiol-dependent ubiquitin-specific protease activity);GO:0005634(nucleus);GO:0005829(cytosol);GO:0006511(ubiquitin-dependent protein catabolic process);GO:0016579(protein deubiquitination)	NA	NA	NA	Ubiquitin carboxyl-terminal hydrolase 20 [Exaiptasia pallida]	0.10682	0	0.067602	0.341405	0.12623	0.287746	0.230906	-2.11462	0.0400264	0.802231	down	yes
MSTRG.17924	Em0013g65a	Em0013g65a.t1	GO:0004536(deoxyribonuclease activity);GO:0006308(DNA catabolic process)	04621(NOD-like receptor signaling pathway)	K04612	NA	Transposon Ty3-I Gag-Pol polyprotein [Trichinella sp. T6]	2.79685	3.32001	1.11015	2.40227	0.528027	0.666007	2.00957	1.00689	0.0413958	0.818075	up	yes
MSTRG.18253	Em0013g373a	Em0013g373a.t1	GO:0003674(molecular_function);GO:0005575(cellular_component);GO:0008150(biological_process)	NA	NA	NA	hypothetical protein pdam_00022875, partial [Pocillopora damicornis]	1.18839	1.10164	4.96162	1.41983	1.14844	1.00583	2.02894	1.02073	0.0428592	0.834074	up	yes
MSTRG.22348	Em0017g327a	Em0017g327a.t1	NA	NA	NA	NA	PREDICTED: uncharacterized protein LOC107339409 isoform X1 [Acropora digitifera]	0.284714	0.33274	0.120486	0.341895	0.568257	0.753272	0.443628	-1.17258	0.0439925	0.847673	down	yes
MSTRG.31667	Em0269g8a	Em0269g8a.t1	GO:0004536(deoxyribonuclease activity);GO:0006308(DNA catabolic process)	04621(NOD-like receptor signaling pathway)	K04612	NA	Transposon Ty3-I Gag-Pol polyprotein [Trichinella zimbabwensis]	0.0364093	0.0299409	0.311434	0.559881	0.480761	0.235928	0.295936	-1.75664	0.0443671	0.851188	down	yes
MSTRG.32715	Em0905g1a	Em0905g1a.t1	GO:0003140(determination of left/right asymmetry in lateral mesoderm);GO:0003401(axis elongation);GO:0005856(cytoskeleton);GO:0035469(determination of pancreatic left/right asymmetry);GO:0035844(cloaca development);GO:0048793(pronephros development);GO:0060028(convergent extension involved in axis elongation);GO:0060828(regulation of canonical Wnt signaling pathway);GO:0061371(determination of he…	NA	NA	NA	PREDICTED: uncharacterized protein LOC109584796 isoform X5 [Amphimedon queenslandica]	0.424559	0.862722	0.159483	0.935729	1.13654	1.21937	0.439526	-1.18598	0.0444053	0.851188	down	yes
MSTRG.1829	Em0001g2126a	Em0001g2126a.t1	NA	NA	NA	NA		0.24578	0.687788	0.362627	0.831306	0.980018	1.8061	0.35832	-1.48068	0.0446608	0.854055	down	yes
MSTRG.14290	Em0009g811a	Em0009g811a.t1	GO:0001881(receptor recycling);GO:0003674(molecular_function);GO:0005575(cellular_component);GO:0005769(early endosome);GO:0005802(trans-Golgi network);GO:0007032(endosome organization);GO:0042147(retrograde transport, endosome to Golgi);GO:0055037(recycling endosome)	NA	NA	NA	PREDICTED: uncharacterized protein LOC109587164 [Amphimedon queenslandica]	0.713815	0.704873	1.63832	0.296413	0.288469	0.680144	2.41656	1.27296	0.0453098	0.861658	up	yes
MSTRG.9173	Em0005g974a	Em0005g974a.t1	GO:0003777(microtubule motor activity);GO:0005524(ATP binding);GO:0007018(microtubule-based movement);GO:0008569(ATP-dependent microtubule motor activity, minus-end-directed);GO:0016887(ATPase activity);GO:0030286(dynein complex);GO:0045503(dynein light chain binding);GO:0045505(dynein intermediate chain binding);GO:0051959(dynein light intermediate chain binding)	NA	NA	NA	PREDICTED: dynein heavy chain 10, axonemal isoform X6 [Macaca fascicularis]	0.0485268	0.311781	0.157851	0.406469	0.616654	0.665205	0.306907	-1.70413	0.0461312	0.869113	down	yes
MSTRG.3331	Em0002g50a	Em0002g50a.t1	NA	NA	NA	NA		2.37467	16.8433	10.7262	2.3246	7.03591	5.42169	2.02569	1.01841	0.0465087	0.870378	up	yes
MSTRG.2284	Em0001g2790a	Em0001g2790a.t1	GO:0004725(protein tyrosine phosphatase activity);GO:0006470(protein dephosphorylation);GO:0016020(membrane);GO:0016021(integral component of membrane);GO:0016311(dephosphorylation);GO:0016791(phosphatase activity)	NA	NA	NA	polyprotein [Lubomirskia baicalensis]	0.133015	0.295072	0.304957	0.071587	0.099611	0.113973	2.57054	1.36207	0.0467561	0.87043	up	yes
MSTRG.311	Em0001g370a	Em0001g370a.t1	NA	NA	NA	NA		0.429037	0.459247	0.619358	0.287804	0	0	5.23843	2.38914	0.0467732	0.87043	up	yes
MSTRG.22589	Em0017g518a	Em0017g518a.t1	NA	NA	NA	NA		1.93152	1.67589	1.51373	0.475507	1.21563	0.455042	2.38617	1.2547	0.0471372	0.873398	up	yes
MSTRG.32970	Em1372g1a	Em1372g1a.t1	GO:0000049(tRNA binding);GO:0001514(selenocysteine incorporation);GO:0005634(nucleus);GO:0005737(cytoplasm);GO:0016785(transferase activity, transferring selenium-containing groups);GO:0097056(selenocysteinyl-tRNA(Sec) biosynthetic process)	00450(Selenocompound metabolism);00970(Aminoacyl-tRNA biosynthesis)	K03341	EC:2.9.1.2	PREDICTED: O-phosphoseryl-tRNA(Sec) selenium transferase-like [Amphimedon queenslandica]	0.458744	0	0	2.15396	2.12971	0	0.107091	-3.22309	0.0475859	0.878693	down	yes
MSTRG.7892	Em0004g1275a	Em0004g1275a.t1	GO:0004930(G-protein coupled receptor activity);GO:0004965(G-protein coupled GABA receptor activity);GO:0007186(G-protein coupled receptor signaling pathway);GO:0016020(membrane);GO:0016021(integral component of membrane)	04080(Neuroactive ligand-receptor interaction)	K04615	NA	gamma-aminobutyric acid type B receptor subunit 1-like [Pocillopora damicornis]	1.12222	0.391014	0.614935	0.925923	1.79204	1.56539	0.496848	-1.00912	0.0479303	0.879517	down	yes
MSTRG.26352	Em0021g195a	Em0021g195a.t1	NA	NA	NA	NA		0.399405	0.287948	1.60388	1.89867	2.07523	2.11828	0.376093	-1.41084	0.0481906	0.880286	down	yes
MSTRG.7132	Em0004g419a	Em0004g419a.t1	NA	NA	NA	NA	PREDICTED: E3 ubiquitin-protein ligase TRIM71-like [Amphimedon queenslandica]	0.107722	0.101196	0.129901	0.469263	0.473388	0.09985	0.325006	-1.62146	0.0481928	0.880286	down	yes
Em0002g632a	Em0002g632a	Em0002g632a.t1	NA	NA	NA	NA	PREDICTED: uncharacterized protein LOC100632604 [Amphimedon queenslandica]	0.240528	0.488666	0.343471	0.303943	0.876999	1.47431	0.403978	-1.30765	0.0493347	0.887218	down	yes
MSTRG.994	Em0001g1135a;Em0001g1124a	Em0001g1135a.t1;Em0001g1124a.t1	NA	NA	NA	NA		9.62491	7.63033	8.30464	4.91232	3.48706	4.49855	1.9817	0.98674	5.67628e-07	0.000112288	up	no
MSTRG.28241	Em0023g108a	Em0023g108a.t1	GO:0004032(alditol:NADP+ 1-oxidoreductase activity);GO:0005737(cytoplasm);GO:0047006(17-alpha,20-alpha-dihydroxypregn-4-en-3-one dehydrogenase activity);GO:0055114(oxidation-reduction process)	00040(Pentose and glucuronate interconversions);00051(Fructose and mannose metabolism);00052(Galactose metabolism);00561(Glycerolipid metabolism);00790(Folate biosynthesis)	K00011	EC:1.1.1.21	PREDICTED: alcohol dehydrogenase [NADP(+)]-like [Amphimedon queenslandica]	67.0899	70.3748	54.9594	31.9728	33.2308	40.3652	1.82274	0.866105	1.57809e-06	0.00029291	up	no
MSTRG.17762	Em0012g988a;Em0012g981a;Em0012g987a	Em0012g988a.t1;Em0012g981a.t1;Em0012g987a.t1	GO:0004497(monooxygenase activity);GO:0005506(iron ion binding);GO:0016020(membrane);GO:0016021(integral component of membrane);GO:0016491(oxidoreductase activity);GO:0016705(oxidoreductase activity, acting on paired donors, with incorporation or reduction of molecular oxygen);GO:0020037(heme binding);GO:0046872(metal ion binding);GO:0055114(oxidation-reduction process);GO:0055114(oxidation-reduc…	00120(Primary bile acid biosynthesis);00120(Primary bile acid biosynthesis)	K07440	EC:1.14.14.25	cholesterol 24-hydroxylase-like [Pocillopora damicornis]	3.17464	3.36718	3.58337	1.57991	1.5538	2.10835	1.93153	0.949743	1.58434e-06	0.00029291	up	no
MSTRG.5645	Em0003g1172a	Em0003g1172a.t1	GO:0001779(natural killer cell differentiation);GO:0004713(protein tyrosine kinase activity);GO:0005524(ATP binding);GO:0005615(extracellular space);GO:0005737(cytoplasm);GO:0007283(spermatogenesis);GO:0016021(integral component of membrane);GO:0016028(rhabdomere);GO:0018108(peptidyl-tyrosine phosphorylation);GO:0030168(platelet activation);GO:0032940(secretion by cell);GO:0034446(substrate adhes…	NA	NA	NA	protein tyrosine kinase [Ephydatia fluviatilis]	43.417	38.2049	40.9967	23.6321	20.8419	26.0952	1.73756	0.797066	3.41869e-06	0.000558913	up	no
MSTRG.28773	Em0023g713a	Em0023g713a.t1	GO:0003824(catalytic activity);GO:0005615(extracellular space);GO:0005975(carbohydrate metabolic process)	00500(Starch and sucrose metabolism)	K01176	EC:3.2.1.1	PREDICTED: alpha-amylase-like [Amphimedon queenslandica]	26.6936	29.6558	27.1931	14.0581	14.3308	17.7891	1.80914	0.855305	4.98672e-06	0.000770682	up	no
MSTRG.18241	Em0013g359a;Em0013g365a;Em0013g360a	Em0013g359a.t1;Em0013g365a.t1;Em0013g360a.t1	GO:0003674(molecular_function);GO:0005575(cellular_component);GO:0008150(biological_process);GO:0045454(cell redox homeostasis);GO:0045454(cell redox homeostasis)	NA	NA	NA	NHL repeat-containing protein 2 [Lingula anatina];PREDICTED: NHL repeat-containing protein 2 [Takifugu rubripes]	8.43275	7.19458	10.5853	4.87457	4.36066	4.65588	1.88701	0.9161	5.6016e-06	0.000852391	up	no
MSTRG.24011	Em0019g66a;Em0019g65a	Em0019g66a.t1;Em0019g65a.t1	GO:0004185(serine-type carboxypeptidase activity);GO:0016747(transferase activity, transferring acyl groups other than amino-acyl groups);GO:0019748(secondary metabolic process);GO:0051603(proteolysis involved in cellular protein catabolic process);GO:0051603(proteolysis involved in cellular protein catabolic process)	NA	NA	NA	Lysosomal protective protein, partial [Stegodyphus mimosarum];hypothetical protein BRAFLDRAFT_88575 [Branchiostoma floridae]	59.1277	49.4975	47.4113	29.0293	29.5628	31.999	1.72243	0.784442	5.99511e-06	0.000898449	up	no
MSTRG.8200	Em0004g1676a	Em0004g1676a.t1	NA	NA	NA	NA	PREDICTED: uncharacterized protein LOC109581441 [Amphimedon queenslandica]	13.9977	10.7643	12.2665	6.55827	7.24001	7.55592	1.73401	0.794115	7.888e-06	0.00114736	up	no
MSTRG.27389	Em0022g245a	Em0022g245a.t1	NA	04120(Ubiquitin mediated proteolysis)	K03871	NA	PREDICTED: uncharacterized protein LOC105316503 [Amphimedon queenslandica]	58.9627	39.6615	45.2132	31.0969	22.3518	25.9428	1.81175	0.857382	1.29687e-05	0.00173342	up	no
MSTRG.5130	Em0003g332a	Em0003g332a.t1	GO:0004252(serine-type endopeptidase activity)	NA	NA	NA	PREDICTED: proteinase T-like [Amphimedon queenslandica]	151.93	127.442	105.982	72.5503	70.4335	83.4357	1.70195	0.767188	1.7867e-05	0.00223699	up	no
MSTRG.27512	Em0022g354a;Em0022g351a;Em0022g355a	Em0022g354a.t1;Em0022g351a.t1;Em0022g355a.t1	GO:0002481(antigen processing and presentation of exogenous protein antigen via MHC class Ib, TAP-dependent);GO:0002485(antigen processing and presentation of endogenous peptide antigen via MHC class I via ER pathway, TAP-dependent);GO:0002489(antigen processing and presentation of endogenous peptide antigen via MHC class Ib via ER pathway, TAP-dependent);GO:0002591(positive regulation of antigen…	02010(ABC transporters);02010(ABC transporters)	K05658	EC:3.6.3.44	PREDICTED: multidrug resistance protein 1-like [Amphimedon queenslandica]	11.6751	12.2822	10.3699	6.95799	6.51484	7.11286	1.66753	0.737711	1.85193e-05	0.00230408	up	no
MSTRG.23090	Em0018g330a;Em0018g319a	Em0018g330a.t1;Em0018g319a.t1	NA	NA	NA	NA	PREDICTED: kielin/chordin-like protein isoform X1 [Amphimedon queenslandica];PREDICTED: kielin/chordin-like protein isoform X2 [Amphimedon queenslandica]	39.8055	30.2701	36.5165	70.6488	68.2531	63.954	0.525457	-0.928354	2.18558e-05	0.00263629	down	no
MSTRG.27964	Em0022g806a	Em0022g806a.t1	NA	NA	NA	NA		167.415	216.296	207.157	365.1	361.827	424.167	0.513309	-0.9621	2.47465e-05	0.00291391	down	no
MSTRG.26677	Em0021g531a	Em0021g531a.t1	GO:0005507(copper ion binding);GO:0005515(protein binding);GO:0005789(endoplasmic reticulum membrane);GO:0016021(integral component of membrane);GO:0016715(oxidoreductase activity, acting on paired donors, with incorporation or reduction of molecular oxygen, reduced ascorbate as one donor, and incorporation of one atom of oxygen);GO:0055114(oxidation-reduction process)	00350(Tyrosine metabolism)	K00503	EC:1.14.17.1	PREDICTED: DBH-like monooxygenase protein 1 homolog [Amphimedon queenslandica]	19.9011	20.4527	13.9574	10.7	9.56773	10.4782	1.76645	0.820854	3.09639e-05	0.00354062	up	no
MSTRG.25737	Em0020g682a	Em0020g682a.t1	GO:0005634(nucleus);GO:0005829(cytosol);GO:0006281(DNA repair);GO:0006974(cellular response to DNA damage stimulus);GO:0010499(proteasomal ubiquitin-independent protein catabolic process);GO:0016504(peptidase activator activity);GO:0035093(spermatogenesis, exchange of chromosomal proteins);GO:0070577(lysine-acetylated histone binding);GO:1990111(spermatoproteasome complex)	03050(Proteasome)	K06699	NA	proteasome activator complex subunit 4, partial [Halichondria panicea]	13.1711	16.1394	12.9503	7.7012	8.60413	8.69176	1.69063	0.757562	3.26396e-05	0.00368967	up	no
MSTRG.21887	Em0016g984a	Em0016g984a.t1	GO:0030154(cell differentiation)	NA	NA	NA	protein PRRC2C isoform X3 [Ciona intestinalis]	9.87564	11.3832	9.75758	17.8097	18.6107	20.1836	0.547954	-0.867874	6.87522e-05	0.00723434	down	no
MSTRG.19895	Em0015g208a;Em0015g207a;Em0015g206a;Em0015g209a;Em0015g205a	Em0015g208a.t1;Em0015g207a.t1;Em0015g206a.t1;Em0015g209a.t1;Em0015g205a.t1	GO:0005515(protein binding);GO:0005829(cytosol);GO:0008884(glutathionylspermidine amidase activity);GO:0008885(glutathionylspermidine synthase activity);GO:0008885(glutathionylspermidine synthase activity)	NA	NA	NA	PREDICTED: trypanothione synthetase-like [Plutella xylostella]	8.53905	9.93212	7.91896	5.21378	5.46366	5.50592	1.6307	0.705488	7.40364e-05	0.00769022	up	no
MSTRG.173	Em0001g209a	Em0001g209a.t1	GO:0004310(farnesyl-diphosphate farnesyltransferase activity);GO:0005783(endoplasmic reticulum);GO:0008610(lipid biosynthetic process);GO:0016021(integral component of membrane)	00100(Steroid biosynthesis)	K00801	EC:2.5.1.21	squalene synthase [Nothoprocta perdicaria]	3.96698	4.8748	3.86581	2.54499	1.85753	2.49115	1.84337	0.882348	7.4251e-05	0.00769022	up	no
MSTRG.6633	Em0003g1839a	Em0003g1839a.t1	NA	NA	NA	NA	hypothetical protein BSL78_21442 [Apostichopus japonicus]	14.2496	12.8263	13.3461	7.41437	7.99669	8.64931	1.68002	0.748482	9.99583e-05	0.0101404	up	no
MSTRG.6954	Em0004g354a	Em0004g354a.t1	GO:0005829(cytosol);GO:0016787(hydrolase activity);GO:0016831(carboxy-lyase activity)	00380(Tryptophan metabolism)	K03392	EC:4.1.1.45	PREDICTED: 2-amino-3-carboxymuconate-6-semialdehyde decarboxylase-like [Amphimedon queenslandica]	8.89086	7.95588	8.25963	15.2041	14.4718	15.1144	0.560531	-0.835135	0.000149652	0.0145833	down	no
MSTRG.512	Em0001g630a	Em0001g630a.t1	NA	NA	NA	NA		46.6014	31.2718	36.5898	22.8494	18.3675	25.6895	1.71079	0.774666	0.000153817	0.0149157	up	no
MSTRG.11466	Em0007g578a	Em0007g578a.t1	NA	NA	NA	NA	PREDICTED: uncharacterized protein LOC109583635 [Amphimedon queenslandica]	5.04127	6.26347	6.92998	9.63222	11.3021	14.1827	0.519256	-0.945483	0.000155452	0.0150007	down	no
MSTRG.11464	Em0007g579a	Em0007g579a.t1	NA	NA	NA	NA	PREDICTED: uncharacterized protein LOC109582278 isoform X1 [Amphimedon queenslandica]	38.6103	34.8831	27.899	24.323	17.875	15.6202	1.75364	0.810353	0.000188641	0.01777	up	no
MSTRG.1959	Em0001g2322a;Em0001g2337a;Em0001g2275a;Em0001g2276a;Em0001g2323a;Em0001g2335a	Em0001g2322a.t1;Em0001g2337a.t1;Em0001g2275a.t1;Em0001g2276a.t1;Em0001g2323a.t1;Em0001g2335a.t1	GO:0000086(G2/M transition of mitotic cell cycle);GO:0001666(response to hypoxia);GO:0001890(placenta development);GO:0005515(protein binding);GO:0005524(ATP binding);GO:0006855(drug transmembrane transport);GO:0007420(brain development);GO:0007595(lactation);GO:0007623(circadian rhythm);GO:0008559(xenobiotic transmembrane transporting ATPase activity);GO:0009914(hormone transport);GO:0009986(cel…	02010(ABC transporters);02010(ABC transporters)	K05658	EC:3.6.3.44	PREDICTED: multidrug resistance protein 1 isoform X4 [Panthera pardus];multidrug resistance protein 1 [Pelodiscus sinensis];PREDICTED: multidrug resistance protein 1-like [Amphimedon queenslandica]	15.1031	13.5257	13.3186	9.31826	9.12548	8.91592	1.53318	0.616531	0.000231969	0.0215396	up	no
MSTRG.19179	Em0014g567a	Em0014g567a.t1	GO:0008612(peptidyl-lysine modification to peptidyl-hypusine);GO:0019135(deoxyhypusine monooxygenase activity);GO:0046872(metal ion binding);GO:0055114(oxidation-reduction process)	NA	NA	NA	PREDICTED: deoxyhypusine hydroxylase [Wasmannia auropunctata]	34.8435	45.6422	32.6854	15.1192	23.9994	24.4944	1.77906	0.831113	0.000244251	0.0223693	up	no
MSTRG.19632	Em0014g829a	Em0014g829a.t1	GO:0005783(endoplasmic reticulum);GO:0016021(integral component of membrane);GO:0016740(transferase activity);GO:0019367(fatty acid elongation, saturated fatty acid);GO:0034625(fatty acid elongation, monounsaturated fatty acid);GO:0034626(fatty acid elongation, polyunsaturated fatty acid);GO:0042761(very long-chain fatty acid biosynthetic process)	00062(Fatty acid elongation);01040(Biosynthesis of unsaturated fatty acids)	K10203	EC:2.3.1.199	hypothetical protein BSL78_05500, partial [Apostichopus japonicus]	35.4719	31.217	34.1177	19.405	21.3235	20.1056	1.65707	0.728637	0.000295936	0.02661	up	no
MSTRG.15443	Em0010g820a	Em0010g820a.t1	GO:0004252(serine-type endopeptidase activity);GO:0005044(scavenger receptor activity);GO:0006508(proteolysis);GO:0006898(receptor-mediated endocytosis);GO:0016020(membrane)	NA	NA	NA	PREDICTED: scavenger receptor cysteine-rich domain superfamily protein-like [Amphimedon queenslandica]	3.2586	2.73854	2.25053	4.95648	4.90535	5.50822	0.536606	-0.898065	0.000299093	0.0267722	down	no
MSTRG.6711	Em0004g28a	Em0004g28a.t1	GO:0004715(non-membrane spanning protein tyrosine kinase activity);GO:0005102(receptor binding);GO:0007169(transmembrane receptor protein tyrosine kinase signaling pathway);GO:0007229(integrin-mediated signaling pathway);GO:0016477(cell migration);GO:0030154(cell differentiation);GO:0031234(extrinsic component of cytoplasmic side of plasma membrane);GO:0038083(peptidyl-tyrosine autophosphorylatio…	04013(MAPK signaling pathway - fly);04310(Wnt signaling pathway);04140(Autophagy - animal);04214(Apoptosis - fly);04624(Toll and Imd signaling pathway)	K04427	EC:2.7.11.25	PREDICTED: ankyrin-3-like [Amphimedon queenslandica]	6.53658	6.3203	5.37411	3.8733	3.24203	4.23375	1.60639	0.683819	0.000332379	0.0290934	up	no
MSTRG.1391	Em0001g1689a	Em0001g1689a.t1	NA	NA	NA	NA	PREDICTED: cell number regulator 3 [Crassostrea gigas]	249.259	284.912	257.441	383.131	463.572	556.523	0.564137	-0.825881	0.000354442	0.030652	down	no
MSTRG.24210	Em0019g255a	Em0019g255a.t1	NA	NA	NA	NA	PREDICTED: uncharacterized protein LOC109581828 [Amphimedon queenslandica]	4.88494	3.55283	6.38103	3.06545	2.3576	2.87385	1.78606	0.836783	0.000354834	0.030652	up	no
MSTRG.26042	Em0020g978a	Em0020g978a.t1	GO:0004523(RNA-DNA hybrid ribonuclease activity);GO:0006298(mismatch repair);GO:0032299(ribonuclease H2 complex);GO:0043137(DNA replication, removal of RNA primer)	03030(DNA replication)	K10743	EC:3.1.26.4	PREDICTED: ribonuclease H2 subunit A-like [Amphimedon queenslandica]	18.4363	15.7094	13.2184	10.6269	8.80117	10.0639	1.606	0.683474	0.00037935	0.0320697	up	no
MSTRG.13723	Em0009g70a	Em0009g70a.t1	NA	NA	NA	NA	hypothetical protein C0J52_15335 [Blattella germanica]	22.0203	23.3962	15.0848	37.2289	34.3714	38.5468	0.549276	-0.864396	0.000395227	0.0332697	down	no
MSTRG.21669	Em0016g742a	Em0016g742a.t1	GO:0002020(protease binding);GO:0005615(extracellular space);GO:0005634(nucleus);GO:0005737(cytoplasm);GO:0010992(ubiquitin recycling);GO:0043209(myelin sheath);GO:0070062(extracellular exosome)	03320(PPAR signaling pathway)	K08770	NA	hypothetical protein HELRODRAFT_193870 [Helobdella robusta]	53.9176	54.1399	63.7178	39.6938	37.0815	31.5519	1.58571	0.665129	0.000450559	0.0372927	up	no
MSTRG.22965	Em0018g177a;Em0018g176a	Em0018g177a.t1;Em0018g176a.t1	GO:0001666(response to hypoxia);GO:0003743(translation initiation factor activity);GO:0004672(protein kinase activity);GO:0005524(ATP binding);GO:0005575(cellular_component);GO:0006412(translation);GO:0006413(translational initiation);GO:0006468(protein phosphorylation);GO:0016301(kinase activity);GO:0016310(phosphorylation);GO:0016740(transferase activity)	04141(Protein processing in endoplasmic reticulum);04140(Autophagy - animal);04137(Mitophagy - animal)	K08860	EC:2.7.11.1	PREDICTED: helicase with zinc finger domain 2-like [Amphimedon queenslandica];PREDICTED: uncharacterized protein LOC109586221 isoform X2 [Amphimedon queenslandica]	2.67977	2.0637	3.12556	4.97938	4.35356	6.03294	0.512111	-0.965472	0.000474837	0.038815	down	no
MSTRG.22806	Em0017g944a	Em0017g944a.t1	GO:0005634(nucleus);GO:0006272(leading strand elongation);GO:0006298(mismatch repair);GO:0019985(translesion synthesis);GO:0030337(DNA polymerase processivity factor activity);GO:0043626(PCNA complex)	03030(DNA replication);03410(Base excision repair);03420(Nucleotide excision repair);03430(Mismatch repair)	K04802	NA	PREDICTED: proliferating cell nuclear antigen-like [Octopus bimaculoides]	20.0788	17.7144	16.7911	31.0444	29.4476	32.9639	0.584066	-0.775798	0.000500934	0.0404468	down	no
MSTRG.13098	Em0008g674a	Em0008g674a.t1	GO:0003824(catalytic activity);GO:0004497(monooxygenase activity);GO:0004500(dopamine beta-monooxygenase activity);GO:0005507(copper ion binding);GO:0005615(extracellular space);GO:0005783(endoplasmic reticulum);GO:0005789(endoplasmic reticulum membrane);GO:0006589(octopamine biosynthetic process);GO:0016020(membrane);GO:0016021(integral component of membrane);GO:0016491(oxidoreductase activity);…	00350(Tyrosine metabolism)	K00503	EC:1.14.17.1	PREDICTED: DBH-like monooxygenase protein 1 [Thamnophis sirtalis]	5.35302	6.02782	3.64535	9.78093	8.348	11.0986	0.514111	-0.959848	0.000515548	0.0412898	down	no
MSTRG.18590	Em0013g747a;Em0013g748a	Em0013g747a.t1;Em0013g748a.t1	GO:0003674(molecular_function);GO:0003954(NADH dehydrogenase activity);GO:0005575(cellular_component);GO:0005654(nucleoplasm);GO:0005739(mitochondrion);GO:0005747(mitochondrial respiratory chain complex I);GO:0006979(response to oxidative stress);GO:0008137(NADH dehydrogenase (ubiquinone) activity);GO:0008150(biological_process);GO:0031625(ubiquitin protein ligase binding);GO:0042775(mitochondria…	00190(Oxidative phosphorylation);03430(Mismatch repair);05200(Pathways in cancer);05210(Colorectal cancer);01524(Platinum drug resistance)	K03935;K08737	EC:1.6.5.3;EC:1.6.99.3	PREDICTED: NADH-ubiquinone oxidoreductase 49 kDa subunit-like [Amphimedon queenslandica];DNA mismatch repair protein Msh6, partial [Cuculus canorus]	17.6261	21.4286	17.1917	11.3174	9.02878	15.2963	1.57807	0.658164	0.000528346	0.0421171	up	no
MSTRG.5980	Em0003g1308a	Em0003g1308a.t1	NA	NA	NA	NA	aggregation factor protein 3, form C, partial [Clathria prolifera]	7.51326	6.32437	7.52587	4.94065	3.94532	5.08642	1.52898	0.612569	0.000532265	0.0421171	up	no
MSTRG.10918	Em0006g1277a	Em0006g1277a.t1	NA	NA	NA	NA	PREDICTED: transmembrane protein 104 homolog [Amphimedon queenslandica]	9.5647	13.4322	7.59493	5.67763	5.93376	6.07375	1.72981	0.790611	0.000583277	0.0457872	up	no
MSTRG.18691	Em0013g965a	Em0013g965a.t1	GO:0003674(molecular_function);GO:0005575(cellular_component);GO:0008150(biological_process)	NA	NA	NA	PREDICTED: sialate O-acetylesterase-like [Acropora digitifera]	6.69825	5.07404	6.13198	10.7947	11.4882	10.6921	0.542965	-0.881069	0.000589016	0.046055	down	no
MSTRG.23778	Em0018g1016a	Em0018g1016a.t1	NA	NA	NA	NA		7.42258	6.21513	6.60097	3.43369	3.71382	3.76842	1.85405	0.890679	0.000619778	0.0479204	up	no
MSTRG.20261	Em0015g511a	Em0015g511a.t1	NA	NA	NA	NA		2.38527	3.18435	3.01072	5.13014	5.00312	5.78616	0.538986	-0.89168	0.000621286	0.0479204	down	no
MSTRG.23594	Em0018g776a;Em0018g785a;Em0018g786a;Em0018g783a;Em0018g784a	Em0018g776a.t1;Em0018g785a.t1;Em0018g786a.t1;Em0018g783a.t1;Em0018g784a.t1	GO:0003924(GTPase activity);GO:0005200(structural constituent of cytoskeleton);GO:0005525(GTP binding);GO:0005737(cytoplasm);GO:0005874(microtubule);GO:0007017(microtubule-based process);GO:0005198(structural molecule activity);GO:0005515(protein binding);GO:0005634(nucleus);GO:0030705(cytoskeleton-dependent intracellular transport);GO:0031982(vesicle);GO:0051301(cell division);GO:0005881(cytopla…	04145(Phagosome);04210(Apoptosis);04530(Tight junction);04540(Gap junction);04012(ErbB signaling pathway);04510(Focal adhesion);04810(Regulation of actin cytoskeleton)	K07374;K05734	EC:2.7.11.1	tubulin alpha-1D chain-like [Orbicella faveolata];hypothetical protein pdam_00010236, partial [Pocillopora damicornis];unnamed protein product [Oikopleura dioica];Iron/zinc purple acid phosphatase-like protein [Stylophora pistillata]	93.2061	41.5385	82.5869	140.371	135.917	147.319	0.513051	-0.962825	0.000682622	0.0515406	down	no
MSTRG.7909	Em0004g1349a	Em0004g1349a.t1	NA	NA	NA	NA	PREDICTED: uncharacterized protein LOC109583473 [Amphimedon queenslandica]	3.39559	3.87043	3.73288	6.6066	5.87859	7.62485	0.546935	-0.870558	0.000690007	0.0519001	down	no
MSTRG.19993	Em0015g69a	Em0015g69a.t1	GO:0016020(membrane);GO:0016021(integral component of membrane);GO:0016125(sterol metabolic process);GO:0047750(cholestenol delta-isomerase activity)	00100(Steroid biosynthesis)	K01824	EC:5.3.3.5	PREDICTED: 3-beta-hydroxysteroid-Delta(8),Delta(7)-isomerase-like [Amphimedon queenslandica]	51.1849	55.5953	52.2696	30.1862	35.1434	38.3037	1.53474	0.61799	0.000700374	0.0520857	up	no
MSTRG.7614	Em0004g909a;Em0004g905a;Em0004g908a	Em0004g909a.t1;Em0004g905a.t1;Em0004g908a.t1	GO:0002224(toll-like receptor signaling pathway);GO:0004842(ubiquitin-protein transferase activity);GO:0005164(tumor necrosis factor receptor binding);GO:0008063(Toll signaling pathway);GO:0008270(zinc ion binding);GO:0009898(cytoplasmic side of plasma membrane);GO:0016567(protein ubiquitination);GO:0019901(protein kinase binding);GO:0019903(protein phosphatase binding);GO:0030162(regulation of p…	04141(Protein processing in endoplasmic reticulum);04010(MAPK signaling pathway);04064(NF-kappa B signaling pathway);04668(TNF signaling pathway);04071(Sphingolipid signaling pathway);04210(Apoptosis);04217(Necroptosis);04621(NOD-like receptor signaling pathway);04622(RIG-I-like receptor signaling pathway);04657(IL-17 signaling pathway);04920(Adipocytokine signaling pathway);04380(Osteoclast diff…	K03173	EC:2.3.2.27	PREDICTED: TNF receptor-associated factor 3-like [Amphimedon queenslandica];probable ubiquitin carboxyl-terminal hydrolase MINDY-4 [Pocillopora damicornis]	2.96726	2.9651	6.35975	2.19091	1.95949	2.01619	1.99334	0.995188	0.000735072	0.0542582	up	no
MSTRG.21701	Em0016g774a	Em0016g774a.t1	GO:0005634(nucleus);GO:0005737(cytoplasm);GO:0006909(phagocytosis);GO:0006914(autophagy);GO:0016567(protein ubiquitination);GO:0019941(modification-dependent protein catabolic process);GO:0031386(protein tag);GO:0031625(ubiquitin protein ligase binding);GO:0035096(larval midgut cell programmed cell death);GO:0070628(proteasome binding)	NA	NA	NA	hypothetical protein HELRODRAFT_193870 [Helobdella robusta]	22.9432	21.3304	21.4572	14.2278	15.2141	14.0355	1.51184	0.596304	0.000915829	0.0663187	up	no
MSTRG.3728	Em0002g841a;Em0002g840a	Em0002g841a.t1;Em0002g840a.t1	GO:0004175(endopeptidase activity);GO:0004930(G-protein coupled receptor activity);GO:0005886(plasma membrane);GO:0007165(signal transduction);GO:0007186(G-protein coupled receptor signaling pathway);GO:0016020(membrane);GO:0016021(integral component of membrane);GO:0030246(carbohydrate binding);GO:0097264(self proteolysis)	NA	NA	NA	PREDICTED: uncharacterized protein LOC105316852 [Amphimedon queenslandica]	13.5596	10.7694	11.4106	7.73559	7.7253	8.28329	1.50519	0.589946	0.000921931	0.0663187	up	no
MSTRG.15073	Em0010g212a;Em0010g214a	Em0010g212a.t1;Em0010g214a.t1	NA	NA	NA	NA	neurogenic locus notch homolog protein 2-like [Crassostrea virginica]	3.58987	3.85969	3.42642	6.17647	6.31086	5.98572	0.588748	-0.764277	0.00100079	0.0717308	down	no
MSTRG.17712	Em0012g916a	Em0012g916a.t1	GO:0000166(nucleotide binding);GO:0000285(1-phosphatidylinositol-3-phosphate 5-kinase activity);GO:0005524(ATP binding);GO:0006458('de novo' protein folding);GO:0010008(endosome membrane);GO:0016020(membrane);GO:0016301(kinase activity);GO:0016307(phosphatidylinositol phosphate kinase activity);GO:0016310(phosphorylation);GO:0016740(transferase activity);GO:0035556(intracellular signal transducti…	00562(Inositol phosphate metabolism);04070(Phosphatidylinositol signaling system);04145(Phagosome)	K00921	EC:2.7.1.150	PREDICTED: 1-phosphatidylinositol 3-phosphate 5-kinase-like [Amphimedon queenslandica]	4.6045	5.94507	3.4071	2.729	2.4864	3.36975	1.62568	0.70104	0.00111345	0.0781075	up	no
MSTRG.27284	Em0022g147a	Em0022g147a.t1	GO:0004674(protein serine/threonine kinase activity);GO:0005634(nucleus);GO:0005737(cytoplasm);GO:0008360(regulation of cell shape);GO:0018105(peptidyl-serine phosphorylation)	NA	NA	NA	PREDICTED: uncharacterized protein K02A2.6-like [Cyprinus carpio]	3.31866	4.94297	6.42295	3.08766	2.75492	2.07154	1.85549	0.891802	0.00126749	0.0867593	up	no
MSTRG.15247	Em0010g382a;Em0010g380a;Em0010g404a;Em0010g377a;Em0010g406a	Em0010g382a.t1;Em0010g380a.t1;Em0010g404a.t1;Em0010g377a.t1;Em0010g406a.t1	GO:0002221(pattern recognition receptor signaling pathway);GO:0005044(scavenger receptor activity);GO:0005515(protein binding);GO:0005576(extracellular region);GO:0005615(extracellular space);GO:0005737(cytoplasm);GO:0006898(receptor-mediated endocytosis);GO:0007275(multicellular organism development);GO:0008329(signaling pattern recognition receptor activity);GO:0015031(protein transport);GO:001…	04330(Notch signaling pathway)	K02599	NA	PREDICTED: deleted in malignant brain tumors 1 protein-like, partial [Amphimedon queenslandica];PREDICTED: scavenger receptor cysteine-rich domain superfamily protein-like [Amphimedon queenslandica];Leishmanolysin-like peptidase [Trichoplax sp. H2]	1.01467	1.7867	1.74447	2.54125	3.11008	3.14484	0.516796	-0.952332	0.00134344	0.0910135	down	no
MSTRG.1878	Em0001g2339a	Em0001g2339a.t1	GO:0000086(G2/M transition of mitotic cell cycle);GO:0000166(nucleotide binding);GO:0005524(ATP binding);GO:0005886(plasma membrane);GO:0006855(drug transmembrane transport);GO:0008559(xenobiotic transmembrane transporting ATPase activity);GO:0009914(hormone transport);GO:0009986(cell surface);GO:0015893(drug transport);GO:0016020(membrane);GO:0016021(integral component of membrane);GO:0016324(ap…	02010(ABC transporters);04976(Bile secretion);05206(MicroRNAs in cancer);05226(Gastric cancer)	K05658	EC:3.6.3.44	multidrug resistance protein 1 [Microcebus murinus]	3.24971	2.95123	2.45443	1.73129	1.71095	1.6524	1.69892	0.764614	0.00134889	0.0910436	up	no
MSTRG.2915	Em0001g3513a	Em0001g3513a.t1	NA	NA	NA	NA	PREDICTED: uncharacterized protein LOC109581413 [Amphimedon queenslandica]	2.34967	1.35126	2.24308	3.39285	3.49032	4.64918	0.51542	-0.956179	0.00135309	0.0910436	down	no
MSTRG.24918	Em0019g1036a	Em0019g1036a.t1	GO:0005524(ATP binding);GO:0005858(axonemal dynein complex);GO:0005929(cilium);GO:0007018(microtubule-based movement);GO:0008569(ATP-dependent microtubule motor activity, minus-end-directed);GO:0030286(dynein complex);GO:0045503(dynein light chain binding);GO:0045505(dynein intermediate chain binding);GO:0051959(dynein light intermediate chain binding);GO:0060271(cilium assembly)	NA	NA	NA	dynein heavy chain 6, axonemal-like [Pocillopora damicornis]	1.18724	2.14159	2.16392	3.23478	3.53303	3.79925	0.519798	-0.943976	0.00142935	0.0952032	down	no
MSTRG.7618	Em0004g963a	Em0004g963a.t1	NA	NA	NA	NA		1.38023	1.68278	1.68861	3.02872	2.72973	3.50595	0.51289	-0.96328	0.00148614	0.0979958	down	no
MSTRG.21764	Em0016g898a;Em0016g899a	Em0016g898a.t1;Em0016g899a.t1	GO:0004768(stearoyl-CoA 9-desaturase activity);GO:0005506(iron ion binding);GO:0005789(endoplasmic reticulum membrane);GO:0006636(unsaturated fatty acid biosynthetic process);GO:0016021(integral component of membrane);GO:0016491(oxidoreductase activity);GO:0016491(oxidoreductase activity)	01040(Biosynthesis of unsaturated fatty acids);01040(Biosynthesis of unsaturated fatty acids)	K00507	EC:1.14.19.1	PREDICTED: acyl-CoA desaturase-like [Amphimedon queenslandica]	8.95243	5.82711	8.02446	6.35176	2.98253	3.60476	1.76242	0.817555	0.0014959	0.0983121	up	no
MSTRG.15059	Em0010g219a	Em0010g219a.t1	NA	04141(Protein processing in endoplasmic reticulum)	K01456	EC:3.5.1.52	PREDICTED: uncharacterized protein LOC109587114 isoform X1 [Amphimedon queenslandica]	4.83427	4.33321	3.72642	2.20056	2.25928	2.66004	1.81097	0.856764	0.0015313	0.0996453	up	no
MSTRG.20235	Em0015g476a;Em0015g475a	Em0015g476a.t1;Em0015g475a.t1	GO:0000048(peptidyltransferase activity);GO:0002682(regulation of immune system process);GO:0002951(leukotriene-C(4) hydrolase);GO:0005615(extracellular space);GO:0005886(plasma membrane);GO:0005887(integral component of plasma membrane);GO:0006412(translation);GO:0006508(proteolysis);GO:0006520(cellular amino acid metabolic process);GO:0006536(glutamate metabolic process);GO:0006631(fatty acid m…	00590(Arachidonic acid metabolism);00430(Taurine and hypotaurine metabolism);00480(Glutathione metabolism)	K18592	EC:2.3.2.2;EC:3.4.19.13	PREDICTED: gamma-glutamyltranspeptidase 1-like [Amphimedon queenslandica];PREDICTED: guanine nucleotide-binding protein subunit beta-like protein [Amphimedon queenslandica]	2.39023	2.07547	1.84515	3.60097	3.41505	4.04187	0.57071	-0.80917	0.001562	0.10131	down	no
MSTRG.26634	Em0021g489a;Em0021g490a;Em0021g491a	Em0021g489a.t1;Em0021g490a.t1;Em0021g491a.t1	GO:0000981(RNA polymerase II transcription factor activity, sequence-specific DNA binding);GO:0003677(DNA binding);GO:0005654(nucleoplasm);GO:0005737(cytoplasm)	NA	NA	NA	PREDICTED: zinc finger protein 862-like [Branchiostoma belcheri];PREDICTED: solute carrier family 15 member 4-like [Amphimedon queenslandica]	1.41701	1.159	1.57798	0.753846	0.708548	0.771938	1.85916	0.894652	0.00160704	0.103216	up	no
MSTRG.15032	Em0010g201a	Em0010g201a.t1	NA	NA	NA	NA	core protein of aggregation factor, partial [Clathria prolifera]	17.5538	13.8282	15.1375	29.1851	21.9265	25.3754	0.608201	-0.717379	0.00165969	0.10591	down	no
MSTRG.32167	Em0520g3a	Em0520g3a.t1	GO:0003140(determination of left/right asymmetry in lateral mesoderm);GO:0003406(retinal pigment epithelium development);GO:0005886(plasma membrane);GO:0008057(eye pigment granule organization);GO:0015991(ATP hydrolysis coupled proton transport);GO:0016020(membrane);GO:0016021(integral component of membrane);GO:0030641(regulation of cellular pH);GO:0032438(melanosome organization);GO:0033180(prot…	00190(Oxidative phosphorylation);04145(Phagosome);04142(Lysosome)	K03662	NA	PREDICTED: V-type proton ATPase subunit S1-like [Amphimedon queenslandica]	52.4279	44.731	54.5652	32.4769	30.7991	41.1202	1.45335	0.539382	0.00172575	0.109771	up	no
MSTRG.10934	Em0006g1264a	Em0006g1264a.t1	NA	NA	NA	NA	PREDICTED: transmembrane protein 104 homolog [Amphimedon queenslandica]	6.0487	8.85381	4.91082	3.99379	3.59005	3.97802	1.71368	0.777096	0.00174007	0.110327	up	no
MSTRG.20063	Em0015g268a	Em0015g268a.t1	GO:0003796(lysozyme activity);GO:0003824(catalytic activity);GO:0005576(extracellular region);GO:0005615(extracellular space);GO:0005975(carbohydrate metabolic process);GO:0007165(signal transduction);GO:0008152(metabolic process);GO:0009253(peptidoglycan catabolic process);GO:0016787(hydrolase activity);GO:0016798(hydrolase activity, acting on glycosyl bonds);GO:0016998(cell wall macromolecule c…	NA	NA	NA	PREDICTED: probable GH family 25 lysozyme 2 [Amphimedon queenslandica]	10.3988	7.96749	6.63881	3.38054	3.05534	6.13059	1.98982	0.99264	0.00177961	0.111633	up	no
MSTRG.13831	Em0009g146a;Em0009g150a	Em0009g146a.t1;Em0009g150a.t1	GO:0004222(metalloendopeptidase activity);GO:0004867(serine-type endopeptidase inhibitor activity);GO:0006508(proteolysis);GO:0008270(zinc ion binding);GO:0010951(negative regulation of endopeptidase activity);GO:0010951(negative regulation of endopeptidase activity)	NA	NA	NA	papilin isoform X5 [Athene cunicularia];PREDICTED: A disintegrin and metalloproteinase with thrombospondin motifs 20-like [Saccoglossus kowalevskii]	8.86798	16.799	11.73	19.9938	23.0829	25.6008	0.54453	-0.876916	0.00178674	0.111633	down	no
MSTRG.16302	Em0011g561a	Em0011g561a.t1	NA	NA	NA	NA		7.37998	9.01826	4.6564	5.19159	2.31982	3.72171	1.87434	0.90638	0.00178888	0.111633	up	no
MSTRG.7990	Em0004g1406a;Em0004g1402a	Em0004g1406a.t1;Em0004g1402a.t1	GO:0004559(alpha-mannosidase activity);GO:0006013(mannose metabolic process);GO:0006517(protein deglycosylation);GO:0003824(catalytic activity);GO:0004553(hydrolase activity, hydrolyzing O-glycosyl compounds);GO:0005764(lysosome);GO:0005774(vacuolar membrane);GO:0005975(carbohydrate metabolic process);GO:0006464(cellular protein modification process);GO:0008152(metabolic process);GO:0008270(zinc …	00511(Other glycan degradation);04142(Lysosome);04142(Lysosome)	K12311	EC:3.2.1.24	PREDICTED: epididymis-specific alpha-mannosidase-like isoform X1 [Amphimedon queenslandica]	0.601027	0.603366	0.621175	1.29019	1.01367	1.29665	0.507031	-0.979854	0.00192835	0.118468	down	no
MSTRG.19565	Em0014g776a;Em0014g765a	Em0014g776a.t1;Em0014g765a.t1	GO:0000278(mitotic cell cycle);GO:0000775(chromosome, centromeric region);GO:0003677(DNA binding);GO:0003682(chromatin binding);GO:0003723(RNA binding);GO:0005634(nucleus);GO:0006261(DNA-dependent DNA replication);GO:0006281(DNA repair);GO:0006396(RNA processing);GO:0006974(cellular response to DNA damage stimulus);GO:0031298(replication fork protection complex);GO:0033044(regulation of chromosom…	NA	NA	NA	WD repeat and HMG-box DNA-binding protein 1-like [Acanthaster planci];hypothetical protein TRIADDRAFT_32433 [Trichoplax adhaerens]	1.26374	1.33224	1.27611	2.41575	2.3008	2.22066	0.558163	-0.841243	0.00208631	0.126212	down	no
MSTRG.11761	Em0007g924a	Em0007g924a.t1	GO:0004553(hydrolase activity, hydrolyzing O-glycosyl compounds);GO:0005575(cellular_component);GO:0005975(carbohydrate metabolic process);GO:0008152(metabolic process);GO:0016020(membrane);GO:0016021(integral component of membrane);GO:0016787(hydrolase activity);GO:0016798(hydrolase activity, acting on glycosyl bonds)	00500(Starch and sucrose metabolism)	K01179	EC:3.2.1.4	GH5 cellulase [Nephotettix cincticeps]	37.3885	27.2378	26.4139	18.7154	19.6204	23.102	1.48183	0.56738	0.00209442	0.126316	up	no
MSTRG.21683	Em0016g755a;Em0016g765a	Em0016g755a.t1;Em0016g765a.t1	GO:0002020(protease binding);GO:0005615(extracellular space);GO:0005634(nucleus);GO:0005737(cytoplasm);GO:0010992(ubiquitin recycling);GO:0043209(myelin sheath);GO:0070062(extracellular exosome);GO:0003674(molecular_function)	03320(PPAR signaling pathway)	K08770	NA	hypothetical protein HELRODRAFT_193870 [Helobdella robusta]	65.8159	65.8399	71.4458	49.9177	47.5465	43.4506	1.44131	0.527378	0.00228966	0.136018	up	no
MSTRG.22579	Em0017g507a;Em0017g521a;Em0017g515a	Em0017g507a.t1;Em0017g521a.t1;Em0017g515a.t1	GO:0016020(membrane);GO:0031514(motile cilium);GO:0034464(BBSome);GO:0036064(ciliary basal body);GO:1903441(protein localization to ciliary membrane);GO:0004512(inositol-3-phosphate synthase activity);GO:0005737(cytoplasm);GO:0006021(inositol biosynthetic process);GO:0008654(phospholipid biosynthetic process);GO:1903441(protein localization to ciliary membrane)	00562(Inositol phosphate metabolism)	K01858	EC:5.5.1.4	LOW QUALITY PROTEIN: uncharacterized protein LOC110986464 [Acanthaster planci];PREDICTED: inositol-3-phosphate synthase 1-A-like [Amphimedon queenslandica]	6.21318	7.08134	5.41917	3.62061	4.48551	4.75288	1.4553	0.541315	0.00240973	0.142722	up	no
MSTRG.16437	Em0011g691a	Em0011g691a.t1	GO:0016020(membrane);GO:0016021(integral component of membrane)	NA	NA	NA	uncharacterized protein LOC111124132 [Crassostrea virginica]	5.62499	5.12457	6.00894	2.59901	3.64239	4.2848	1.59207	0.670908	0.00245385	0.144902	up	no
MSTRG.16433	Em0011g683a	Em0011g683a.t1	GO:0000166(nucleotide binding);GO:0004672(protein kinase activity);GO:0004713(protein tyrosine kinase activity);GO:0004714(transmembrane receptor protein tyrosine kinase activity);GO:0005003(ephrin receptor activity);GO:0005004(GPI-linked ephrin receptor activity);GO:0005524(ATP binding);GO:0005769(early endosome);GO:0005886(plasma membrane);GO:0005887(integral component of plasma membrane);GO:00…	NA	NA	NA	PREDICTED: uncharacterized protein LOC100641922 [Amphimedon queenslandica]	9.58177	8.3637	8.21278	5.42794	6.25934	6.07176	1.47295	0.558713	0.00248448	0.14584	up	no
MSTRG.24149	Em0019g197a	Em0019g197a.t1	GO:0006261(DNA-dependent DNA replication);GO:0008270(zinc ion binding);GO:0008623(CHRAC)	NA	NA	NA	PREDICTED: bromodomain adjacent to zinc finger domain protein 1A-like [Amphimedon queenslandica]	6.04099	6.03577	5.53446	8.92962	9.50604	9.74544	0.62493	-0.678233	0.00251597	0.147234	down	no
MSTRG.21945	Em0016g1020a	Em0016g1020a.t1	GO:0001889(liver development);GO:0002088(lens development in camera-type eye);GO:0003677(DNA binding);GO:0003682(chromatin binding);GO:0003886(DNA (cytosine-5-)-methyltransferase activity);GO:0005634(nucleus);GO:0006306(DNA methylation);GO:0008168(methyltransferase activity);GO:0008270(zinc ion binding);GO:0010842(retina layer formation);GO:0016740(transferase activity);GO:0031016(pancreas develo…	00270(Cysteine and methionine metabolism)	K00558	EC:2.1.1.37	PREDICTED: DNA (cytosine-5)-methyltransferase 1-like isoform X1 [Amphimedon queenslandica]	3.95879	3.3515	4.76049	6.60147	6.62276	7.10406	0.593792	-0.75197	0.00255901	0.148577	down	no
MSTRG.5235	Em0003g380a	Em0003g380a.t1	GO:0005887(integral component of plasma membrane);GO:0007166(cell surface receptor signaling pathway)	04142(Lysosome)	K06497	NA	tetraspanin-18-like [Pomacea canaliculata]	14.2452	14.0946	13.8419	25.1217	21.7313	22.5145	0.608092	-0.71764	0.00258248	0.148577	down	no
MSTRG.4278	Em0002g1205a;Em0002g1200a	Em0002g1205a.t1;Em0002g1200a.t1	NA	NA	NA	NA		21.5669	15.4584	13.3931	9.4155	9.31745	14.4617	1.51887	0.602998	0.00258369	0.148577	up	no
MSTRG.9095	Em0005g1014a	Em0005g1014a.t1	GO:0020037(heme binding)	00120(Primary bile acid biosynthesis)	K07440	EC:1.14.14.25	PREDICTED: cholesterol 24-hydroxylase-like isoform X1 [Pundamilia nyererei]	4.73064	3.75269	2.9491	1.98477	2.2014	2.80637	1.63494	0.709241	0.00278212	0.156797	up	no
MSTRG.23843	Em0018g1081a	Em0018g1081a.t1	GO:0000780(condensed nuclear chromosome, centromeric region);GO:0005876(spindle microtubule);GO:0007052(mitotic spindle organization);GO:0031616(spindle pole centrosome);GO:0032133(chromosome passenger complex);GO:0032465(regulation of cytokinesis);GO:0035174(histone serine kinase activity);GO:0051233(spindle midzone)	NA	NA	NA	aurora kinase A-A-like isoform X1 [Lingula anatina]	8.55708	10.5394	9.06257	13.4479	17.0158	19.468	0.563953	-0.826354	0.00279222	0.156919	down	no
MSTRG.12357	Em0007g1331a	Em0007g1331a.t1	GO:0005506(iron ion binding);GO:0006633(fatty acid biosynthetic process);GO:0016021(integral component of membrane);GO:0016491(oxidoreductase activity);GO:0055114(oxidation-reduction process)	00100(Steroid biosynthesis)	K07750	EC:1.14.18.9	PREDICTED: methylsterol monooxygenase 1 [Ornithorhynchus anatinus]	25.9496	27.7161	21.7106	15.4574	17.6812	18.2989	1.46539	0.551289	0.00281326	0.157654	up	no
MSTRG.22349	Em0017g328a	Em0017g328a.t1	NA	00760(Nicotinate and nicotinamide metabolism)	K00541	EC:2.1.1.1	indolethylamine N-methyltransferase-like [Orbicella faveolata]	5.0757	6.34196	4.0526	8.51469	9.15756	10.1941	0.555159	-0.849027	0.00292607	0.162139	down	no
MSTRG.23322	Em0018g410a	Em0018g410a.t1	GO:0004197(cysteine-type endopeptidase activity);GO:0005615(extracellular space);GO:0005764(lysosome);GO:0051603(proteolysis involved in cellular protein catabolic process)	04142(Lysosome)	K08568	EC:3.4.18.1	cathepsin X/O [Suberites domuncula]	11.7314	11.9854	9.61923	19.0346	18.1283	19.2053	0.591397	-0.7578	0.00302669	0.16678	down	no
MSTRG.3493	Em0002g488a	Em0002g488a.t1	GO:0000122(negative regulation of transcription by RNA polymerase II);GO:0001932(regulation of protein phosphorylation);GO:0005634(nucleus);GO:0005730(nucleolus);GO:0005737(cytoplasm);GO:0005886(plasma membrane);GO:0006468(protein phosphorylation);GO:0008630(intrinsic apoptotic signaling pathway in response to DNA damage);GO:0033138(positive regulation of peptidyl-serine phosphorylation)	04150(mTOR signaling pathway)	K20401	NA	PREDICTED: uncharacterized protein LOC100636825 [Amphimedon queenslandica]	14.5699	13.4619	17.4992	10.4467	10.7748	10.3614	1.44163	0.527706	0.00309159	0.168745	up	no
MSTRG.14634	Em0009g945a;Em0009g939a;Em0009g938a	Em0009g945a.t1;Em0009g939a.t1;Em0009g938a.t1	NA	NA	NA	NA	PREDICTED: uncharacterized protein LOC100637094 [Amphimedon queenslandica]	12.9193	11.6494	10.3883	7.35649	7.77295	9.69506	1.40817	0.493819	0.00309647	0.168745	up	no
MSTRG.12991	Em0008g573a	Em0008g573a.t1	GO:0005247(voltage-gated chloride channel activity);GO:0005765(lysosomal membrane);GO:0006821(chloride transport);GO:0016021(integral component of membrane);GO:0034220(ion transmembrane transport);GO:1903959(regulation of anion transmembrane transport)	NA	NA	NA	PREDICTED: chloride transport protein 6-like [Amphimedon queenslandica]	7.21327	8.01542	6.7655	4.24291	4.40547	5.85913	1.51606	0.600322	0.0031527	0.170612	up	no
MSTRG.6804	Em0004g147a	Em0004g147a.t1	NA	NA	NA	NA	PREDICTED: uncharacterized protein LOC109585900 [Amphimedon queenslandica]	7.00153	6.35141	7.86528	4.83553	4.4167	4.94363	1.49468	0.579833	0.00319102	0.171535	up	no
MSTRG.23822	Em0018g1060a	Em0018g1060a.t1	GO:0005615(extracellular space);GO:0005739(mitochondrion);GO:0005764(lysosome);GO:0006631(fatty acid metabolic process);GO:0006650(glycerophospholipid metabolic process);GO:0006672(ceramide metabolic process);GO:0008374(O-acyltransferase activity);GO:0016020(membrane);GO:0034638(phosphatidylcholine catabolic process);GO:0046338(phosphatidylethanolamine catabolic process);GO:0047499(calcium-indepe…	00564(Glycerophospholipid metabolism);04142(Lysosome)	K06129	EC:3.1.1.5	PREDICTED: group XV phospholipase A2-like [Branchiostoma belcheri]	61.1899	51.5519	47.3216	36.2005	37.0923	39.2878	1.42177	0.507687	0.00332959	0.177059	up	no
MSTRG.19033	Em0014g188a	Em0014g188a.t1	NA	NA	NA	NA		22.9279	28.6133	19.6066	63.4159	31.3227	40.8294	0.524812	-0.930127	0.003381	0.179311	down	no
MSTRG.8425	Em0005g228a	Em0005g228a.t1	NA	NA	NA	NA		4.74062	5.37589	5.62053	8.00368	9.62513	11.1683	0.54648	-0.871759	0.00356473	0.187291	down	no
MSTRG.5795	Em0003g814a	Em0003g814a.t1	GO:0005085(guanyl-nucleotide exchange factor activity);GO:0005096(GTPase activator activity);GO:0005575(cellular_component);GO:0007264(small GTPase mediated signal transduction);GO:0043052(thermotaxis);GO:0046956(positive phototaxis);GO:0090630(activation of GTPase activity);GO:1903013(response to differentiation-inducing factor 1)	04068(FoxO signaling pathway);04150(mTOR signaling pathway)	K03099	NA	PREDICTED: ras-specific guanine nucleotide-releasing factor 1-like [Amphimedon queenslandica]	13.1161	12.8285	13.3519	9.5684	9.62226	8.94033	1.39691	0.482238	0.0037908	0.195795	up	no
MSTRG.17412	Em0012g699a;Em0012g695a;Em0012g661a	Em0012g699a.t1;Em0012g695a.t1;Em0012g661a.t1	GO:0008210(estrogen metabolic process);GO:0045600(positive regulation of fat cell differentiation);GO:0047894(flavonol 3-sulfotransferase activity);GO:0050294(steroid sulfotransferase activity);GO:0051923(sulfation);GO:0051923(sulfation)	00140(Steroid hormone biosynthesis);00140(Steroid hormone biosynthesis)	K01016	EC:2.8.2.4	sulfotransferase 1C2-like [Stylophora pistillata];estrogen sulfotransferase [Enhydra lutris kenyoni]	4.50253	1.53588	3.33195	7.16349	6.71316	4.82795	0.500966	-0.997216	0.00392376	0.201088	down	no
MSTRG.8516	Em0005g263a;Em0005g267a	Em0005g263a.t1;Em0005g267a.t1	NA	NA	NA	NA		3.27903	2.1277	3.53617	2.03154	1.49171	1.82352	1.67258	0.742075	0.00410151	0.208576	up	no
MSTRG.30946	Em0106g13a	Em0106g13a.t1	GO:0000070(mitotic sister chromatid segregation);GO:0000086(G2/M transition of mitotic cell cycle);GO:0000122(negative regulation of transcription by RNA polymerase II);GO:0000281(mitotic cytokinesis);GO:0000776(kinetochore);GO:0000785(chromatin);GO:0000795(synaptonemal complex);GO:0000922(spindle pole);GO:0000942(condensed nuclear chromosome outer kinetochore);GO:0001578(microtubule bundle forma…	04068(FoxO signaling pathway)	K06631	EC:2.7.11.21	PREDICTED: serine/threonine-protein kinase PLK1-like [Amphimedon queenslandica]	2.48655	1.55607	1.9062	3.32179	3.57133	4.98156	0.500967	-0.997212	0.00416749	0.210847	down	no
MSTRG.8882	Em0005g706a	Em0005g706a.t1	GO:0001666(response to hypoxia);GO:0005319(lipid transporter activity);GO:0006869(lipid transport);GO:0016020(membrane);GO:0016021(integral component of membrane);GO:0030301(cholesterol transport);GO:0035855(megakaryocyte development);GO:0043009(chordate embryonic development);GO:0055113(epiboly involved in gastrulation with mouth forming second)	04142(Lysosome)	K12385	NA	PREDICTED: Niemann-Pick C1 protein-like [Amphimedon queenslandica]	42.2805	45.9427	35.7626	26.7504	31.6203	29.1628	1.41644	0.502268	0.00422745	0.213335	up	no
MSTRG.509	Em0001g627a	Em0001g627a.t1	NA	NA	NA	NA	PREDICTED: transient receptor potential cation channel subfamily A member 1 homolog [Amphimedon queenslandica]	27.1685	20.6368	23.2118	16.3653	16.6109	18.3219	1.3844	0.469264	0.00442475	0.222724	up	no
MSTRG.20301	Em0015g520a	Em0015g520a.t1	GO:0005737(cytoplasm);GO:0005829(cytosol);GO:0016491(oxidoreductase activity);GO:0046686(response to cadmium ion);GO:0055114(oxidation-reduction process)	NA	NA	NA	PREDICTED: probable aldo-keto reductase 2 [Diachasma alloeum]	25.9145	20.7004	23.6002	13.0548	17.0845	19.1637	1.42415	0.510104	0.00445128	0.22349	up	no
MSTRG.17841	Em0012g1070a;Em0012g1068a	Em0012g1070a.t1;Em0012g1068a.t1	GO:0009234(menaquinone biosynthetic process);GO:0016020(membrane);GO:0016021(integral component of membrane);GO:0016491(oxidoreductase activity);GO:0016627(oxidoreductase activity, acting on the CH-CH group of donors);GO:0055114(oxidation-reduction process);GO:0071949(FAD binding);GO:0071949(FAD binding)	NA	NA	NA	PREDICTED: conditioned medium factor receptor 1-like [Branchiostoma belcheri]	2.83929	4.10723	1.92832	0.897806	1.47423	2.27893	1.90817	0.93219	0.00449079	0.22462	up	no
MSTRG.2043	Em0001g2217a;Em0001g2162a;Em0001g2209a;Em0001g2221a;Em0001g2213a	Em0001g2217a.t1;Em0001g2162a.t1;Em0001g2209a.t1;Em0001g2221a.t1;Em0001g2213a.t1	GO:0004252(serine-type endopeptidase activity);GO:0000324(fungal-type vacuole);GO:0000747(conjugation with cellular fusion);GO:0005794(Golgi apparatus);GO:0006508(proteolysis);GO:0006914(autophagy);GO:0007033(vacuole organization);GO:0007039(protein catabolic process in the vacuole);GO:0009267(cellular response to starvation);GO:0042802(identical protein binding);GO:0043086(negative regulation of…	NA	NA	NA	PREDICTED: proteinase T-like [Amphimedon queenslandica]	3.66216	4.78431	1.99197	4.89595	7.6766	6.92766	0.535299	-0.901583	0.00474503	0.235254	down	no
MSTRG.1019	Em0001g1188a	Em0001g1188a.t1	NA	NA	NA	NA		5.06273	3.45126	4.65738	2.42111	1.50973	3.10526	1.87197	0.904556	0.00481283	0.237425	up	no
MSTRG.30901	Em0099g16a;Em0099g25a	Em0099g16a.t1;Em0099g25a.t1	GO:0001726(ruffle);GO:0003723(RNA binding);GO:0003779(actin binding);GO:0005615(extracellular space);GO:0005886(plasma membrane);GO:0005902(microvillus);GO:0005913(cell-cell adherens junction);GO:0005925(focal adhesion);GO:0008360(regulation of cell shape);GO:0008361(regulation of cell size);GO:0010628(positive regulation of gene expression);GO:0016324(apical plasma membrane);GO:0019904(protein d…	NA	NA	NA	PREDICTED: radixin-like [Amphimedon queenslandica]	31.03	27.9556	28.2359	40.4271	46.4138	47.3144	0.650153	-0.621148	0.00493108	0.242051	down	no
MSTRG.18940	Em0014g65a;Em0014g64a	Em0014g65a.t1;Em0014g64a.t1	GO:0008210(estrogen metabolic process);GO:0045600(positive regulation of fat cell differentiation);GO:0047894(flavonol 3-sulfotransferase activity);GO:0050294(steroid sulfotransferase activity);GO:0051923(sulfation);GO:0004748(ribonucleoside-diphosphate reductase activity, thioredoxin disulfide as acceptor);GO:0005971(ribonucleoside-diphosphate reductase complex);GO:0009263(deoxyribonucleotide bi…	NA	NA	NA	PREDICTED: sulfotransferase 1 family member D1-like [Calidris pugnax];putative RNA-directed DNA polymerase from transposon X-element [Toxocara canis]	6.47294	6.82681	5.58634	4.33879	4.24621	4.74689	1.41661	0.502443	0.00497258	0.242262	up	no
MSTRG.20555	Em0015g904a	Em0015g904a.t1	NA	NA	NA	NA		2.28612	2.77121	2.43282	5.00948	3.29671	5.35617	0.548233	-0.86714	0.0051109	0.245932	down	no
MSTRG.5704	Em0003g1183a;Em0003g1190a;Em0003g1187a	Em0003g1183a.t1;Em0003g1190a.t1;Em0003g1187a.t1	GO:0003676(nucleic acid binding);GO:0008150(biological_process)	NA	NA	NA	PREDICTED: TNF receptor-associated factor 4-like [Amphimedon queenslandica];PREDICTED: uncharacterized protein LOC109590640 [Amphimedon queenslandica]	1.78204	1.3308	1.82282	2.81324	2.39354	3.06431	0.596738	-0.744832	0.00549208	0.259294	down	no
MSTRG.22719	Em0017g816a	Em0017g816a.t1	GO:0004197(cysteine-type endopeptidase activity);GO:0005615(extracellular space);GO:0005764(lysosome);GO:0051603(proteolysis involved in cellular protein catabolic process)	04145(Phagosome);04142(Lysosome);04140(Autophagy - animal)	K01365	EC:3.4.22.15	cathepsin L [Lubomirskia baicalensis]	1241.35	1058.49	1037.01	817.028	830.04	804.345	1.36119	0.444873	0.00574494	0.269849	up	no
MSTRG.9689	Em0005g1605a	Em0005g1605a.t1	GO:0000785(chromatin);GO:0003682(chromatin binding);GO:0005515(protein binding);GO:0006268(DNA unwinding involved in DNA replication);GO:0016887(ATPase activity);GO:0030174(regulation of DNA-dependent DNA replication initiation);GO:0042555(MCM complex)	03030(DNA replication)	K02541	EC:3.6.4.12	PREDICTED: zygotic DNA replication licensing factor mcm3-like [Amphimedon queenslandica]	9.8547	7.99034	9.03683	14.7996	14.1195	13.5269	0.633321	-0.658992	0.00576965	0.269849	down	no
MSTRG.32202	Em0542g3a	Em0542g3a.t1	NA	NA	NA	NA		10.3205	14.6529	10.5276	14.1068	24.6828	26.7153	0.541959	-0.883745	0.00578699	0.269996	down	no
MSTRG.22807	Em0017g945a	Em0017g945a.t1	GO:0005615(extracellular space);GO:0006526(arginine biosynthetic process);GO:0008152(metabolic process);GO:0008270(zinc ion binding);GO:0008652(cellular amino acid biosynthetic process);GO:0008777(acetylornithine deacetylase activity);GO:0016787(hydrolase activity);GO:0043171(peptide catabolic process);GO:0045335(phagocytic vesicle);GO:0046872(metal ion binding);GO:0070573(metallodipeptidase acti…	00220(Arginine biosynthesis)	K01438	EC:3.5.1.16	PREDICTED: acetylornithine deacetylase-like [Amphimedon queenslandica]	73.1431	69.7906	82.7229	54.9924	47.5873	61.5628	1.37476	0.459181	0.00597371	0.275533	up	no
MSTRG.12498	Em0007g1581a;Em0007g1565a;Em0007g1579a;Em0007g1518a	Em0007g1581a.t1;Em0007g1565a.t1;Em0007g1579a.t1;Em0007g1518a.t1	GO:0004930(G-protein coupled receptor activity);GO:0005887(integral component of plasma membrane);GO:0007166(cell surface receptor signaling pathway);GO:0007186(G-protein coupled receptor signaling pathway);GO:0007186(G-protein coupled receptor signaling pathway)	NA	NA	NA	PREDICTED: peptidase inhibitor 16-like [Branchiostoma belcheri];hypothetical protein BRAFLDRAFT_220379 [Branchiostoma floridae];Glioma pathogenesis-related protein 1 [Crassostrea gigas]	3.52892	6.66826	4.27322	8.28877	9.68295	7.79975	0.561489	-0.83267	0.00597532	0.275533	down	no
MSTRG.18002	Em0013g175a	Em0013g175a.t1	NA	NA	NA	NA	proliferation marker protein Ki-67-like isoform X3 [Notechis scutatus]	5.2433	7.47448	6.71464	9.52296	10.1974	12.1063	0.610571	-0.711769	0.00604199	0.277315	down	no
MSTRG.25139	Em0020g19a	Em0020g19a.t1	GO:0005201(extracellular matrix structural constituent);GO:0005886(plasma membrane);GO:0007160(cell-matrix adhesion);GO:0007605(sensory perception of sound);GO:0031225(anchored component of membrane)	NA	NA	NA	PREDICTED: sushi, nidogen and EGF-like domain-containing protein 1 [Ficedula albicollis]	2.7752	2.75905	1.69178	3.89012	3.72008	4.19607	0.61205	-0.708278	0.00607151	0.278025	down	no
MSTRG.15666	Em0010g887a;Em0010g886a	Em0010g887a.t1;Em0010g886a.t1	GO:0006508(proteolysis);GO:0008236(serine-type peptidase activity);GO:0005829(cytosol);GO:0042802(identical protein binding)	NA	NA	NA	PREDICTED: dipeptidyl peptidase 8-like [Amphimedon queenslandica]	18.2469	18.9397	18.316	13.1331	12.7414	15.2435	1.34984	0.432783	0.00608985	0.278176	up	no
MSTRG.10328	Em0006g616a	Em0006g616a.t1	NA	NA	NA	NA		7.07018	4.6895	4.01483	3.93321	2.51712	3.18611	1.63696	0.711022	0.0061644	0.279932	up	no
MSTRG.9484	Em0005g1344a;Em0005g1345a	Em0005g1344a.t1;Em0005g1345a.t1	NA	04512(ECM-receptor interaction)	K06255	NA	uncharacterized protein LOC105685724 [Athalia rosae]	6.17707	5.37121	4.83409	4.1849	3.7333	3.84873	1.39224	0.477406	0.00616977	0.279932	up	no
MSTRG.11148	Em0007g238a;Em0007g239a	Em0007g238a.t1;Em0007g239a.t1	NA	NA	NA	NA	PREDICTED: uncharacterized protein LOC109583173 [Amphimedon queenslandica]	0.771475	1.21655	1.11755	1.58132	1.82844	2.50535	0.525023	-0.929548	0.00624991	0.281838	down	no
MSTRG.19080	Em0014g229a	Em0014g229a.t1	NA	NA	NA	NA		12.5785	17.8809	10.1888	19.6523	21.5752	29.2322	0.576902	-0.793603	0.0063289	0.284542	down	no
MSTRG.4843	Em0003g60a	Em0003g60a.t1	GO:0000981(RNA polymerase II transcription factor activity, sequence-specific DNA binding);GO:0005634(nucleus)	04218(Cellular senescence)	K09406	NA	PREDICTED: forkhead box protein C1-B-like isoform X2 [Amphimedon queenslandica]	2.94378	4.73027	4.58633	5.72837	8.86051	9.09299	0.517712	-0.949779	0.00641683	0.285896	down	no
MSTRG.7280	Em0004g697a	Em0004g697a.t1	NA	NA	NA	NA	PREDICTED: uncharacterized protein LOC100632089 [Amphimedon queenslandica]	4.88889	4.92218	2.98314	7.68192	5.31868	9.23125	0.57549	-0.797137	0.00667975	0.296275	down	no
MSTRG.26214	Em0021g62a	Em0021g62a.t1	GO:0000079(regulation of cyclin-dependent protein serine/threonine kinase activity);GO:0005634(nucleus);GO:0007049(cell cycle);GO:0010389(regulation of G2/M transition of mitotic cell cycle);GO:0019901(protein kinase binding);GO:0051301(cell division)	04068(FoxO signaling pathway)	K21771	NA	PREDICTED: G2/mitotic-specific cyclin-B3-like [Amphimedon queenslandica]	6.88328	7.16454	9.13927	11.4011	13.0043	14.5917	0.594586	-0.750043	0.00671094	0.296993	down	no
MSTRG.15493	Em0010g878a	Em0010g878a.t1	GO:0005634(nucleus);GO:0005737(cytoplasm);GO:0005783(endoplasmic reticulum);GO:0006913(nucleocytoplasmic transport);GO:0048471(perinuclear region of cytoplasm)	NA	NA	NA	acidic leucine-rich nuclear phosphoprotein 32 family member A [Nilaparvata lugens]	23.4856	30.7881	27.8922	39.4073	45.8371	46.3326	0.62447	-0.679296	0.00681564	0.300283	down	no
MSTRG.2579	Em0001g2535a;Em0001g2531a	Em0001g2535a.t1;Em0001g2531a.t1	GO:0006979(response to oxidative stress);GO:0010038(response to metal ion);GO:0012505(endomembrane system);GO:0016746(transferase activity, transferring acyl groups);GO:0042594(response to starvation);GO:0045471(response to ethanol);GO:0045471(response to ethanol)	00071(Fatty acid degradation);00071(Fatty acid degradation)	K08765	EC:2.3.1.21	PREDICTED: carnitine O-palmitoyltransferase 1, muscle isoform-like isoform X1 [Amphimedon queenslandica]	14.1731	17.8051	7.91542	7.02597	9.08037	9.57679	1.5533	0.635338	0.00726436	0.315832	up	no
MSTRG.32405	Em0665g1a;Em0665g3a	Em0665g1a.t1;Em0665g3a.t1	GO:0000724(double-strand break repair via homologous recombination);GO:0000910(cytokinesis);GO:0005515(protein binding);GO:0005765(lysosomal membrane);GO:0005813(centrosome);GO:0030496(midbody);GO:0032266(phosphatidylinositol-3-phosphate binding);GO:0046872(metal ion binding)	NA	NA	NA	PREDICTED: zinc finger FYVE domain-containing protein 26-like [Amphimedon queenslandica]	2.37905	2.73543	3.09783	1.61545	1.66319	2.06293	1.53743	0.620523	0.00737769	0.318983	up	no
MSTRG.15126	Em0010g297a	Em0010g297a.t1	GO:0003824(catalytic activity);GO:0004084(branched-chain-amino-acid transaminase activity);GO:0005739(mitochondrion);GO:0008152(metabolic process);GO:0008483(transaminase activity);GO:0008652(cellular amino acid biosynthetic process);GO:0009081(branched-chain amino acid metabolic process);GO:0009082(branched-chain amino acid biosynthetic process);GO:0009098(leucine biosynthetic process);GO:000909…	00270(Cysteine and methionine metabolism);00280(Valine, leucine and isoleucine degradation);00290(Valine, leucine and isoleucine biosynthesis);00770(Pantothenate and CoA biosynthesis)	K00826	EC:2.6.1.42	predicted protein [Nematostella vectensis]	11.0493	10.5667	11.6273	21.398	16.9767	17.1608	0.598597	-0.740343	0.0074045	0.319058	down	no
MSTRG.6414	Em0003g1533a	Em0003g1533a.t1	NA	NA	NA	NA	aggregation factor protein 3, form C, partial [Clathria prolifera]	17.9	13.9348	14.8986	13.5566	9.19094	10.8907	1.3893	0.474356	0.00743534	0.319058	up	no
MSTRG.10560	Em0006g870a	Em0006g870a.t1	GO:0004601(peroxidase activity);GO:0005615(extracellular space);GO:0005737(cytoplasm);GO:0006952(defense response);GO:0006954(inflammatory response);GO:0006979(response to oxidative stress);GO:0009617(response to bacterium);GO:0010310(regulation of hydrogen peroxide metabolic process);GO:0016491(oxidoreductase activity);GO:0020037(heme binding);GO:0042742(defense response to bacterium);GO:0055114…	NA	NA	NA	PREDICTED: eosinophil peroxidase-like [Amphimedon queenslandica]	137.385	105.924	118.629	92.6154	80.7282	95.346	1.34705	0.429801	0.00750566	0.321379	up	no
MSTRG.24847	Em0019g967a	Em0019g967a.t1	GO:0005249(voltage-gated potassium channel activity);GO:0008076(voltage-gated potassium channel complex);GO:0060072(large conductance calcium-activated potassium channel activity)	NA	NA	NA	PREDICTED: calcium-activated potassium channel subunit alpha-1-like [Saccoglossus kowalevskii]	3.40148	2.44723	2.98375	1.63816	1.33219	2.344	1.662	0.732923	0.00752721	0.321605	up	no
MSTRG.22275	Em0017g190a;Em0017g201a	Em0017g190a.t1;Em0017g201a.t1	NA	NA	NA	NA		6.48342	8.71488	4.85642	8.69592	12.0194	13.3899	0.588025	-0.766051	0.00756527	0.322535	down	no
MSTRG.20516	Em0015g786a	Em0015g786a.t1	NA	00760(Nicotinate and nicotinamide metabolism)	K18152	EC:3.2.2.6;EC:2.4.99.20	PREDICTED: ADP-ribosyl cyclase/cyclic ADP-ribose hydrolase 2-like [Amphimedon queenslandica]	10.4973	7.95069	6.86519	4.86075	5.93603	4.9283	1.60973	0.686822	0.00762955	0.322629	up	no
MSTRG.6030	Em0003g1443a;Em0003g1445a;Em0003g1454a;Em0003g1451a	Em0003g1443a.t1;Em0003g1445a.t1;Em0003g1454a.t1;Em0003g1451a.t1	GO:0009082(branched-chain amino acid biosynthetic process);GO:0052654(L-leucine transaminase activity);GO:0052655(L-valine transaminase activity);GO:0052656(L-isoleucine transaminase activity);GO:0000724(double-strand break repair via homologous recombination);GO:0003677(DNA binding);GO:0005634(nucleus);GO:0005694(chromosome);GO:0005737(cytoplasm);GO:0009378(four-way junction helicase activity);G…	00270(Cysteine and methionine metabolism);00280(Valine, leucine and isoleucine degradation);00290(Valine, leucine and isoleucine biosynthesis);00770(Pantothenate and CoA biosynthesis);03018(RNA degradation);00770(Pantothenate and CoA biosynthesis)	K00826;K03654	EC:2.6.1.42;EC:3.6.4.12	PREDICTED: branched-chain-amino-acid aminotransferase, cytosolic-like [Amphimedon queenslandica];PREDICTED: uncharacterized protein LOC100633019 [Amphimedon queenslandica];WD repeat domain phosphoinositide-interacting protein 4 isoform X1 [Alligator sinensis]	7.55656	7.49447	12.8055	20.3982	13.5402	14.9	0.570383	-0.809997	0.00782042	0.327762	down	no
MSTRG.16370	Em0011g555a	Em0011g555a.t1	GO:0005351(carbohydrate:proton symporter activity);GO:0005355(glucose transmembrane transporter activity);GO:0005887(integral component of plasma membrane);GO:0046323(glucose import)	NA	NA	NA	arrestin domain-containing protein 3-like [Halyomorpha halys]	2.6596	2.97169	2.51426	4.67254	4.55629	4.43913	0.595959	-0.746715	0.00795446	0.331584	down	no
MSTRG.8525	Em0005g271a	Em0005g271a.t1	NA	NA	NA	NA		2.81313	2.11118	2.60514	1.67219	1.08357	1.29049	1.86085	0.89596	0.00796191	0.331584	up	no
MSTRG.27234	Em0022g126a	Em0022g126a.t1	GO:0004016(adenylate cyclase activity);GO:0005886(plasma membrane);GO:0006171(cAMP biosynthetic process);GO:0007189(adenylate cyclase-activating G-protein coupled receptor signaling pathway);GO:0007193(adenylate cyclase-inhibiting G-protein coupled receptor signaling pathway);GO:0019933(cAMP-mediated signaling)	00230(Purine metabolism)	K08049	EC:4.6.1.1	PREDICTED: adenylate cyclase type 9-like [Amphimedon queenslandica]	6.13244	6.62638	6.95306	10.6147	8.92216	11.1554	0.642244	-0.638807	0.0082491	0.339259	down	no
MSTRG.26075	Em0020g1043a	Em0020g1043a.t1	GO:0004715(non-membrane spanning protein tyrosine kinase activity);GO:0005102(receptor binding);GO:0007169(transmembrane receptor protein tyrosine kinase signaling pathway);GO:0030154(cell differentiation);GO:0031234(extrinsic component of cytoplasmic side of plasma membrane);GO:0038083(peptidyl-tyrosine autophosphorylation);GO:0042127(regulation of cell proliferation);GO:0045087(innate immune re…	NA	NA	NA	PREDICTED: ephrin type-A receptor 4-A-like isoform X1 [Amphimedon queenslandica]	7.38314	6.66122	5.91695	5.08566	4.50415	5.07175	1.36147	0.445167	0.00856617	0.346212	up	no
MSTRG.13752	Em0009g80a	Em0009g80a.t1	GO:0004674(protein serine/threonine kinase activity);GO:0005634(nucleus);GO:0005737(cytoplasm);GO:0008360(regulation of cell shape);GO:0018105(peptidyl-serine phosphorylation)	04141(Protein processing in endoplasmic reticulum);04140(Autophagy - animal);05168(Herpes simplex infection)	K16196	EC:2.7.11.1	PREDICTED: uncharacterized protein K02A2.6-like, partial [Takifugu rubripes]	1.35204	1.14558	0.949685	0.890923	0.608033	0.586593	1.65295	0.725043	0.00859194	0.346212	up	no
MSTRG.8158	Em0004g1672a	Em0004g1672a.t1	NA	NA	NA	NA	PREDICTED: uncharacterized protein LOC109583473 [Amphimedon queenslandica]	9.05218	6.80089	15.1041	6.75104	5.88828	6.60231	1.60886	0.68604	0.00859318	0.346212	up	no
MSTRG.30021	Em0037g12a	Em0037g12a.t1	GO:0001658(branching involved in ureteric bud morphogenesis);GO:0001822(kidney development);GO:0003007(heart morphogenesis);GO:0005509(calcium ion binding);GO:0005622(intracellular);GO:0005886(plasma membrane);GO:0007009(plasma membrane organization);GO:0007156(homophilic cell adhesion via plasma membrane adhesion molecules);GO:0007157(heterophilic cell-cell adhesion via plasma membrane cell adhe…	NA	NA	NA	PREDICTED: protocadherin Fat 4-like [Amphimedon queenslandica]	9.18213	6.82346	9.44862	5.52945	6.41618	6.43297	1.38499	0.469878	0.00861348	0.346325	up	no
MSTRG.8759	Em0005g583a	Em0005g583a.t1	NA	NA	NA	NA	PREDICTED: uncharacterized protein LOC109582058 isoform X1 [Amphimedon queenslandica]	43.3801	35.0972	41.5654	31.9498	27.0675	29.0553	1.363	0.446782	0.00876199	0.350161	up	no
MSTRG.32892	Em1158g1a	Em1158g1a.t1	GO:0004512(inositol-3-phosphate synthase activity);GO:0005737(cytoplasm);GO:0006021(inositol biosynthetic process);GO:0008654(phospholipid biosynthetic process)	00562(Inositol phosphate metabolism)	K01858	EC:5.5.1.4	PREDICTED: inositol-3-phosphate synthase 1-A-like [Amphimedon queenslandica]	11.531	11.1164	10.304	6.8117	5.91187	10.0043	1.44982	0.535877	0.00912273	0.362054	up	no
MSTRG.11595	Em0007g683a	Em0007g683a.t1	GO:0005385(zinc ion transmembrane transporter activity);GO:0005887(integral component of plasma membrane);GO:0006882(cellular zinc ion homeostasis);GO:0016020(membrane);GO:0016021(integral component of membrane);GO:0030001(metal ion transport);GO:0046873(metal ion transmembrane transporter activity);GO:0055085(transmembrane transport);GO:0071578(zinc II ion transmembrane import)	NA	NA	NA	PREDICTED: zinc transporter ZIP4-like [Amphimedon queenslandica]	9.74269	7.70834	7.04861	5.14673	5.2182	6.65899	1.43913	0.525197	0.00913279	0.362054	up	no
MSTRG.17608	Em0012g794a	Em0012g794a.t1	GO:0004767(sphingomyelin phosphodiesterase activity);GO:0005764(lysosome);GO:0005768(endosome);GO:0005886(plasma membrane);GO:0006685(sphingomyelin catabolic process);GO:0016021(integral component of membrane);GO:0016798(hydrolase activity, acting on glycosyl bonds);GO:0023021(termination of signal transduction);GO:0035307(positive regulation of protein dephosphorylation);GO:0043407(negative regu…	00600(Sphingolipid metabolism);04142(Lysosome)	K12350	EC:3.1.4.12	PREDICTED: sphingomyelin phosphodiesterase-like [Branchiostoma belcheri]	24.7032	21.9803	24.1567	17.4225	17.4218	18.3463	1.33182	0.413397	0.00917198	0.362679	up	no
MSTRG.926	Em0001g1081a	Em0001g1081a.t1	GO:0004842(ubiquitin-protein transferase activity);GO:0031463(Cul3-RING ubiquitin ligase complex)	NA	NA	NA	predicted protein [Nematostella vectensis]	2.06929	1.71928	1.50996	1.0836	1.20374	1.40382	1.43546	0.521513	0.00918522	0.362679	up	no
MSTRG.31727	Em0301g4a;Em0301g2a;Em0301g5a	Em0301g4a.t1;Em0301g2a.t1;Em0301g5a.t1	GO:0000166(nucleotide binding);GO:0004672(protein kinase activity);GO:0004713(protein tyrosine kinase activity);GO:0004714(transmembrane receptor protein tyrosine kinase activity);GO:0005524(ATP binding);GO:0005737(cytoplasm);GO:0006468(protein phosphorylation);GO:0016020(membrane);GO:0016021(integral component of membrane);GO:0016301(kinase activity);GO:0016310(phosphorylation);GO:0016740(transf…	NA	NA	NA	proline and serine-rich 1-like protein [Labeo rohita];PREDICTED: probable serine/threonine-protein kinase drkD [Amphimedon queenslandica]	0.780483	0.634785	0.590158	1.27094	1.01781	1.53929	0.523878	-0.932697	0.00937239	0.367866	down	no
MSTRG.26569	Em0021g410a	Em0021g410a.t1	NA	NA	NA	NA		18.6185	19.389	21.477	12.0997	12.1378	13.8979	1.55982	0.64138	0.00942259	0.368375	up	no
MSTRG.17086	Em0011g1197a	Em0011g1197a.t1	GO:0004725(protein tyrosine phosphatase activity);GO:0035335(peptidyl-tyrosine dephosphorylation);GO:0070062(extracellular exosome)	NA	NA	NA	PREDICTED: receptor-type tyrosine-protein phosphatase epsilon-like [Amphimedon queenslandica]	10.6231	10.2532	9.71829	6.93722	7.51156	8.36359	1.34114	0.42346	0.00952807	0.369577	up	no
MSTRG.20666	Em0015g1018a	Em0015g1018a.t1	GO:0004674(protein serine/threonine kinase activity);GO:0005622(intracellular);GO:0018105(peptidyl-serine phosphorylation);GO:0035556(intracellular signal transduction)	04068(FoxO signaling pathway)	K13303	EC:2.7.11.1	PREDICTED: cAMP-dependent protein kinase catalytic subunit alpha-like [Amphimedon queenslandica]	6.33531	5.88792	6.57905	4.18606	4.68029	4.56891	1.39947	0.484883	0.0096267	0.372672	up	no
MSTRG.5774	Em0003g794a	Em0003g794a.t1	GO:0016491(oxidoreductase activity);GO:0055114(oxidation-reduction process)	00590(Arachidonic acid metabolism);00790(Folate biosynthesis);00980(Metabolism of xenobiotics by cytochrome P450)	K00079	EC:1.1.1.184;EC:1.1.1.189	carbonyl reductase [NADPH] 1-like [Stylophora pistillata]	7.90997	6.28781	6.50182	4.41072	4.7899	4.31031	1.53206	0.615475	0.010031	0.383576	up	no
MSTRG.12025	Em0006g1560a	Em0006g1560a.t1	GO:0000070(mitotic sister chromatid segregation);GO:0000086(G2/M transition of mitotic cell cycle);GO:0000122(negative regulation of transcription by RNA polymerase II);GO:0000281(mitotic cytokinesis);GO:0000776(kinetochore);GO:0000785(chromatin);GO:0000795(synaptonemal complex);GO:0000922(spindle pole);GO:0000942(condensed nuclear chromosome outer kinetochore);GO:0001578(microtubule bundle forma…	04068(FoxO signaling pathway)	K06631	EC:2.7.11.21	PREDICTED: serine/threonine-protein kinase PLK1-like [Amphimedon queenslandica]	7.10686	11.2058	9.35874	13.5773	15.0785	16.5822	0.611685	-0.709138	0.0100871	0.384478	down	no
MSTRG.16357	Em0011g544a	Em0011g544a.t1	GO:0000166(nucleotide binding);GO:0005524(ATP binding);GO:0006855(drug transmembrane transport);GO:0016020(membrane);GO:0016021(integral component of membrane);GO:0016324(apical plasma membrane);GO:0016887(ATPase activity);GO:0017127(cholesterol transporter activity);GO:0033344(cholesterol efflux);GO:0042626(ATPase activity, coupled to transmembrane movement of substances);GO:0043190(ATP-binding …	02010(ABC transporters)	K05681	NA	PREDICTED: ATP-binding cassette sub-family G member 2-like [Amphimedon queenslandica]	10.0666	8.7046	10.646	6.24189	6.93973	8.0893	1.38298	0.467775	0.0101323	0.385455	up	no
MSTRG.16056	Em0011g260a;Em0011g254a;Em0011g252a	Em0011g260a.t1;Em0011g254a.t1;Em0011g252a.t1	GO:0004842(ubiquitin-protein transferase activity);GO:0005813(centrosome);GO:0005829(cytosol);GO:0007165(signal transduction);GO:0008270(zinc ion binding);GO:0016567(protein ubiquitination);GO:0031625(ubiquitin protein ligase binding);GO:0031996(thioesterase binding);GO:0042981(regulation of apoptotic process);GO:0043123(positive regulation of I-kappaB kinase/NF-kappaB signaling);GO:0051092(posit…	04141(Protein processing in endoplasmic reticulum);04141(Protein processing in endoplasmic reticulum)	K03173	EC:2.3.2.27	PREDICTED: TNF receptor-associated factor 2-like [Amphimedon queenslandica]	17.1167	14.6224	14.3289	18.8618	22.9364	28.5908	0.654478	-0.611584	0.0104393	0.394004	down	no
MSTRG.12441	Em0007g1511a	Em0007g1511a.t1	NA	NA	NA	NA		6.27846	10.2841	6.14028	11.2608	12.177	15.5751	0.581934	-0.781072	0.0108317	0.404133	down	no
MSTRG.23854	Em0018g1085a	Em0018g1085a.t1	GO:0004613(phosphoenolpyruvate carboxykinase (GTP) activity);GO:0005525(GTP binding);GO:0005739(mitochondrion);GO:0006094(gluconeogenesis);GO:0016301(kinase activity);GO:0016310(phosphorylation);GO:0070062(extracellular exosome)	00010(Glycolysis / Gluconeogenesis);00020(Citrate cycle (TCA cycle));00620(Pyruvate metabolism);04068(FoxO signaling pathway)	K01596	EC:4.1.1.32	PREDICTED: phosphoenolpyruvate carboxykinase, cytosolic [GTP] [Amphimedon queenslandica]	27.9799	18.1142	27.2563	20.2115	16.6965	13.9161	1.44322	0.529293	0.0108856	0.404774	up	no
MSTRG.10555	Em0006g864a;Em0006g866a	Em0006g864a.t1;Em0006g866a.t1	GO:0004601(peroxidase activity);GO:0006979(response to oxidative stress);GO:0020037(heme binding);GO:0055114(oxidation-reduction process);GO:0098869(cellular oxidant detoxification);GO:0098869(cellular oxidant detoxification)	NA	NA	NA	PREDICTED: eosinophil peroxidase-like [Amphimedon queenslandica]	25.0196	25.8444	51.8389	26.6645	19.3142	18.9059	1.58286	0.662529	0.0110407	0.40909	up	no
MSTRG.21667	Em0016g724a	Em0016g724a.t1	NA	NA	NA	NA	spherulin-2A-like [Galleria mellonella]	19.6343	34.7546	10.1102	42.7425	40.5605	39.1047	0.52692	-0.924345	0.0111569	0.409928	down	no
MSTRG.10179	Em0006g570a	Em0006g570a.t1	NA	NA	NA	NA		0.845402	1.31327	0.708322	1.28467	1.61088	2.11904	0.571731	-0.806593	0.0111958	0.409928	down	no
MSTRG.21952	Em0016g1032a	Em0016g1032a.t1	GO:0009044(xylan 1,4-beta-xylosidase activity);GO:0009505(plant-type cell wall);GO:0031222(arabinan catabolic process);GO:0045493(xylan catabolic process);GO:0046556(alpha-L-arabinofuranosidase activity)	00500(Starch and sucrose metabolism)	K05349	EC:3.2.1.21	PREDICTED: uncharacterized protein LOC105316759 [Amphimedon queenslandica]	5.60718	11.3858	9.60107	11.8779	15.9189	19.1682	0.566253	-0.820481	0.0112158	0.409928	down	no
MSTRG.31124	Em0136g14a	Em0136g14a.t1	NA	NA	NA	NA		23.7289	38.5003	29.7224	47.0376	43.9319	58.6446	0.614591	-0.7023	0.0113413	0.410815	down	no
MSTRG.3078	Em0001g3280a	Em0001g3280a.t1	NA	NA	NA	NA		3.66052	4.51381	2.95821	2.69664	1.89602	2.16729	1.64684	0.719699	0.0113688	0.410815	up	no
MSTRG.26688	Em0021g546a	Em0021g546a.t1	NA	NA	NA	NA		12.0143	9.08018	5.12406	5.35792	5.26945	4.12403	1.77736	0.829737	0.0113718	0.410815	up	no
MSTRG.15306	Em0010g445a;Em0010g461a	Em0010g445a.t1;Em0010g461a.t1	NA	NA	NA	NA	PREDICTED: serine/threonine-protein phosphatase 6 regulatory ankyrin repeat subunit B-like [Amphimedon queenslandica]	49.0661	24.9113	44.6881	28.696	28.8224	19.7722	1.53532	0.618536	0.0113804	0.410815	up	no
MSTRG.14126	Em0009g594a	Em0009g594a.t1	GO:0016740(transferase activity)	00590(Arachidonic acid metabolism);00480(Glutathione metabolism);00980(Metabolism of xenobiotics by cytochrome P450);00982(Drug metabolism - cytochrome P450)	K04097	EC:5.3.99.2;EC:2.5.1.18	PREDICTED: glutathione S-transferase 1-like [Amphimedon queenslandica]	74.4692	61.5004	75.0925	101.309	99.0068	115.832	0.667604	-0.582936	0.0114011	0.410815	down	no
MSTRG.30419	Em0058g16a;Em0058g15a	Em0058g16a.t1;Em0058g15a.t1	GO:0004715(non-membrane spanning protein tyrosine kinase activity);GO:0005102(receptor binding);GO:0006935(chemotaxis);GO:0007155(cell adhesion);GO:0007173(epidermal growth factor receptor signaling pathway);GO:0030154(cell differentiation);GO:0031234(extrinsic component of cytoplasmic side of plasma membrane);GO:0038083(peptidyl-tyrosine autophosphorylation);GO:0038095(Fc-epsilon receptor signal…	NA	NA	NA	protein tyrosine kinase, partial [Ephydatia fluviatilis]	7.07333	5.6263	5.89414	3.96674	4.56982	4.98236	1.37539	0.459839	0.0114858	0.412364	up	no
MSTRG.16581	Em0011g827a	Em0011g827a.t1	GO:0006090(pyruvate metabolic process);GO:0008903(hydroxypyruvate isomerase activity)	00630(Glyoxylate and dicarboxylate metabolism)	K01816	EC:5.3.1.22	PREDICTED: putative hydroxypyruvate isomerase [Amphimedon queenslandica]	10.6178	7.87847	6.81483	4.96577	4.84636	6.26828	1.57403	0.654465	0.011588	0.413778	up	no
MSTRG.4836	Em0003g47a	Em0003g47a.t1	GO:0004190(aspartic-type endopeptidase activity);GO:0005615(extracellular space);GO:0005764(lysosome);GO:0006508(proteolysis);GO:0030163(protein catabolic process)	04142(Lysosome);04140(Autophagy - animal)	K01379	EC:3.4.23.5	cathepsin D [Pteria penguin]	59.8272	64.4317	54.3026	41.7411	43.0915	50.355	1.32084	0.401459	0.0116375	0.414798	up	no
MSTRG.5302	Em0003g573a	Em0003g573a.t1	NA	NA	NA	NA	PREDICTED: uncharacterized protein LOC109582278 isoform X1 [Amphimedon queenslandica]	6.05379	5.06035	4.42654	2.3819	3.39695	3.03739	1.76273	0.817814	0.0117139	0.415213	up	no
MSTRG.12438	Em0007g1514a	Em0007g1514a.t1	GO:0005829(cytosol);GO:0008781(N-acylneuraminate cytidylyltransferase activity)	00520(Amino sugar and nucleotide sugar metabolism)	K21749	EC:2.7.7.43;EC:2.7.7.92	PREDICTED: SCO-spondin-like [Branchiostoma belcheri]	5.50585	7.22646	5.18824	8.56039	9.27058	15.1156	0.543928	-0.878513	0.0117182	0.415213	down	no
MSTRG.27427	Em0022g299a	Em0022g299a.t1	GO:0001658(branching involved in ureteric bud morphogenesis);GO:0001822(kidney development);GO:0003007(heart morphogenesis);GO:0005509(calcium ion binding);GO:0005622(intracellular);GO:0005886(plasma membrane);GO:0007009(plasma membrane organization);GO:0007156(homophilic cell adhesion via plasma membrane adhesion molecules);GO:0007157(heterophilic cell-cell adhesion via plasma membrane cell adhe…	04391(Hippo signaling pathway -fly);04392(Hippo signaling pathway - multiple species)	K16507	NA	PREDICTED: uncharacterized protein LOC105313586 [Amphimedon queenslandica]	35.8667	29.0219	34.5842	50.0427	50.9036	47.1807	0.671537	-0.574461	0.0117825	0.415213	down	no
MSTRG.24677	Em0019g836a	Em0019g836a.t1	GO:0004197(cysteine-type endopeptidase activity);GO:0006624(vacuolar protein processing);GO:0051603(proteolysis involved in cellular protein catabolic process)	04142(Lysosome)	K01369	EC:3.4.22.34	PREDICTED: LOW QUALITY PROTEIN: legumain-like [Saccoglossus kowalevskii]	75.9771	62.5456	62.0629	51.3621	45.3589	55.398	1.31861	0.399017	0.0117859	0.415213	up	no
MSTRG.15986	Em0011g217a	Em0011g217a.t1	GO:0004842(ubiquitin-protein transferase activity);GO:0031463(Cul3-RING ubiquitin ligase complex)	04068(FoxO signaling pathway);04625(C-type lectin receptor signaling pathway);05152(Tuberculosis)	K08862	EC:2.7.11.21	PREDICTED: BTB/POZ domain-containing protein 19-like [Amphimedon queenslandica]	2.22701	1.98101	2.63196	4.83411	3.97651	4.71389	0.505747	-0.983512	0.0118013	0.415213	down	no
MSTRG.24226	Em0019g296a	Em0019g296a.t1	GO:0003854(3-beta-hydroxy-delta5-steroid dehydrogenase activity);GO:0006694(steroid biosynthetic process);GO:0016491(oxidoreductase activity);GO:0016616(oxidoreductase activity, acting on the CH-OH group of donors, NAD or NADP as acceptor);GO:0055114(oxidation-reduction process)	NA	NA	NA	PREDICTED: tetraketide alpha-pyrone reductase 1-like [Amphimedon queenslandica]	10.9697	10.1194	9.15082	7.27684	7.11526	7.51022	1.38067	0.465369	0.0118159	0.415213	up	no
MSTRG.30827	Em0097g6a	Em0097g6a.t1	NA	NA	NA	NA		23.3022	38.2145	29.193	46.2075	43.2687	58.0482	0.614879	-0.701625	0.0119746	0.419589	down	no
MSTRG.469	Em0001g562a	Em0001g562a.t1	NA	00515(Mannose type O-glycan biosyntheis)	K09666	EC:2.4.1.-	protein O-linked-mannose beta-1,2-N-acetylglucosaminyltransferase 1-like [Pocillopora damicornis]	3.69896	3.65769	5.66261	2.33261	2.73692	2.75058	1.66484	0.735386	0.0120052	0.419589	up	no
MSTRG.1334	Em0001g1567a	Em0001g1567a.t1	GO:0000784(nuclear chromosome, telomeric region);GO:0000785(chromatin);GO:0003678(DNA helicase activity);GO:0003688(DNA replication origin binding);GO:0005524(ATP binding);GO:0005654(nucleoplasm);GO:0005664(nuclear origin of replication recognition complex);GO:0005737(cytoplasm);GO:0006268(DNA unwinding involved in DNA replication);GO:0006270(DNA replication initiation);GO:0006334(nucleosome asse…	03030(DNA replication)	K02540	EC:3.6.4.12	PREDICTED: DNA replication licensing factor mcm2-like isoform X1 [Amphimedon queenslandica]	2.99565	3.19545	3.75004	5.41266	5.53567	5.17574	0.61654	-0.697734	0.0120372	0.419965	down	no
MSTRG.26888	Em0021g767a;Em0021g760a	Em0021g767a.t1;Em0021g760a.t1	GO:0004553(hydrolase activity, hydrolyzing O-glycosyl compounds);GO:0005575(cellular_component);GO:0010411(xyloglucan metabolic process);GO:0010411(xyloglucan metabolic process)	00052(Galactose metabolism);00500(Starch and sucrose metabolism);00500(Starch and sucrose metabolism)	K12317	EC:3.2.1.20	PREDICTED: uncharacterized protein LOC109581014 [Amphimedon queenslandica]	10.8764	8.42527	8.76395	7.84591	5.84722	7.35166	1.33361	0.415341	0.0121492	0.42164	up	no
MSTRG.16164	Em0011g433a	Em0011g433a.t1	NA	NA	NA	NA	PREDICTED: uncharacterized protein LOC100637058 isoform X2 [Amphimedon queenslandica]	3.79172	4.8145	4.9491	2.95963	2.58165	2.49187	1.68742	0.754823	0.012859	0.441627	up	no
MSTRG.25384	Em0020g288a	Em0020g288a.t1	GO:0003676(nucleic acid binding);GO:0015074(DNA integration)	NA	NA	NA	Transposon Ty3-G Gag-Pol polyprotein [Trichinella nelsoni]	1.36919	1.51028	1.51302	0.976664	0.646229	0.836026	1.78635	0.837015	0.0128854	0.441766	up	no
MSTRG.8290	Em0005g81a	Em0005g81a.t1	GO:0008540(proteasome regulatory particle, base subcomplex);GO:0017025(TBP-class protein binding);GO:0030433(ubiquitin-dependent ERAD pathway);GO:0031595(nuclear proteasome complex);GO:0031597(cytosolic proteasome complex);GO:0036402(proteasome-activating ATPase activity);GO:0045899(positive regulation of RNA polymerase II transcriptional preinitiation complex assembly)	03050(Proteasome)	K03063	NA	26S proteasome regulatory subunit 6B, partial [Halichondria panicea]	2.82694	3.09457	1.12517	1.28219	1.09464	1.25902	1.93812	0.954655	0.0130088	0.444368	up	no
MSTRG.27302	Em0022g165a	Em0022g165a.t1	GO:0001947(heart looping);GO:0005814(centriole);GO:0007420(brain development);GO:0008589(regulation of smoothened signaling pathway);GO:0016485(protein processing);GO:0021915(neural tube development);GO:0021997(neural plate axis specification);GO:0030162(regulation of proteolysis);GO:0034451(centriolar satellite);GO:0036064(ciliary basal body);GO:0042733(embryonic digit morphogenesis);GO:0061511(…	NA	NA	NA	C2 domain-containing protein 3 [Boleophthalmus pectinirostris]	1.52338	1.83336	2.12255	2.9829	2.9475	2.96022	0.616301	-0.698294	0.0130287	0.444368	down	no
MSTRG.23144	Em0018g248a	Em0018g248a.t1	GO:0003674(molecular_function);GO:0005737(cytoplasm);GO:0005814(centriole);GO:0005856(cytoskeleton);GO:0030030(cell projection organization);GO:0060271(cilium assembly);GO:0097546(ciliary base)	NA	NA	NA	PREDICTED: protein FAM92A1-A-like [Amphimedon queenslandica]	4.16992	3.17782	6.29592	2.11851	2.43361	3.10615	1.78156	0.83314	0.0131258	0.445049	up	no
MSTRG.22604	Em0017g577a	Em0017g577a.t1	GO:0005887(integral component of plasma membrane);GO:0007166(cell surface receptor signaling pathway)	NA	NA	NA	PREDICTED: tetraspanin-6-like [Amphimedon queenslandica]	89.2478	116.594	49.8143	59.1467	52.7438	60.0903	1.48654	0.571959	0.0131514	0.445049	up	no
MSTRG.13216	Em0008g749a;Em0008g745a;Em0008g740a;Em0008g753a;Em0008g750a;Em0008g748a;Em0008g744a	Em0008g749a.t1;Em0008g745a.t1;Em0008g740a.t1;Em0008g753a.t1;Em0008g750a.t1;Em0008g748a.t1;Em0008g744a.t1	GO:0002224(toll-like receptor signaling pathway);GO:0004842(ubiquitin-protein transferase activity);GO:0005164(tumor necrosis factor receptor binding);GO:0008063(Toll signaling pathway);GO:0008270(zinc ion binding);GO:0009898(cytoplasmic side of plasma membrane);GO:0016567(protein ubiquitination);GO:0019901(protein kinase binding);GO:0019903(protein phosphatase binding);GO:0030162(regulation of p…	04620(Toll-like receptor signaling pathway);04621(NOD-like receptor signaling pathway);04622(RIG-I-like receptor signaling pathway);05168(Herpes simplex infection);04064(NF-kappa B signaling pathway);04668(TNF signaling pathway);04657(IL-17 signaling pathway);05200(Pathways in cancer);05203(Viral carcinogenesis);05222(Small cell lung cancer);05160(Hepatitis C);05167(Kaposi sarcoma-associated herp…	K03174	NA	PREDICTED: TNF receptor-associated factor 3-like [Amphimedon queenslandica]	2.92017	1.96082	4.83796	1.92223	2.18293	2.17044	1.54869	0.631048	0.0133047	0.44837	up	no
MSTRG.21571	Em0016g600a	Em0016g600a.t1	NA	NA	NA	NA		15.7565	13.6695	4.6082	22.3257	22.8656	19.0812	0.52953	-0.917216	0.0133377	0.448718	down	no
MSTRG.1204	Em0001g1416a	Em0001g1416a.t1	NA	NA	NA	NA	PREDICTED: uncharacterized protein LOC109580975 [Amphimedon queenslandica]	7.54271	5.33295	6.18149	4.37728	4.08488	4.58537	1.46059	0.546555	0.0133709	0.449071	up	no
MSTRG.1362	Em0001g1590a	Em0001g1590a.t1	GO:0000784(nuclear chromosome, telomeric region);GO:0000785(chromatin);GO:0003678(DNA helicase activity);GO:0003688(DNA replication origin binding);GO:0005524(ATP binding);GO:0005654(nucleoplasm);GO:0005664(nuclear origin of replication recognition complex);GO:0005737(cytoplasm);GO:0006268(DNA unwinding involved in DNA replication);GO:0006270(DNA replication initiation);GO:0006334(nucleosome asse…	03030(DNA replication)	K02540	EC:3.6.4.12	PREDICTED: DNA replication licensing factor mcm2-like isoform X1 [Amphimedon queenslandica]	2.85107	2.7007	2.77911	5.0915	5.12564	4.48273	0.566732	-0.819261	0.0134121	0.449693	down	no
MSTRG.11316	Em0007g331a;Em0007g332a	Em0007g331a.t1;Em0007g332a.t1	GO:0004197(cysteine-type endopeptidase activity);GO:0005634(nucleus);GO:0005737(cytoplasm);GO:0005813(centrosome);GO:0051307(meiotic chromosome separation);GO:0072686(mitotic spindle);GO:1901970(positive regulation of mitotic sister chromatid separation)	NA	NA	NA	uncharacterized protein LOC110463375 [Mizuhopecten yessoensis]	1.65179	2.0063	1.96403	2.59939	3.18868	3.15035	0.628984	-0.668905	0.0135222	0.452617	down	no
MSTRG.20840	Em0015g1180a	Em0015g1180a.t1	NA	NA	NA	NA		16.4752	13.6055	14.5778	8.05566	9.80169	13.289	1.43383	0.51987	0.0136206	0.455141	up	no
MSTRG.16037	Em0011g283a	Em0011g283a.t1	GO:0005044(scavenger receptor activity);GO:0005507(copper ion binding);GO:0005615(extracellular space);GO:0006898(receptor-mediated endocytosis);GO:0016020(membrane);GO:0016641(oxidoreductase activity, acting on the CH-NH2 group of donors, oxygen as acceptor);GO:0055114(oxidation-reduction process)	NA	NA	NA	PREDICTED: lysyl oxidase homolog 4-like [Amphimedon queenslandica]	2.45891	2.93479	3.56842	4.28709	5.46251	5.33036	0.594307	-0.75072	0.0136822	0.4564	down	no
MSTRG.18762	Em0013g1059a	Em0013g1059a.t1	GO:0043231(intracellular membrane-bounded organelle)	00062(Fatty acid elongation);04142(Lysosome)	K01074	EC:3.1.2.22	hypothetical protein BRAFLDRAFT_276374 [Branchiostoma floridae]	10.7902	8.01925	11.0173	6.17975	7.25818	7.47963	1.42592	0.511896	0.01371	0.4564	up	no
MSTRG.16073	Em0011g271a;Em0011g270a;Em0011g273a	Em0011g271a.t1;Em0011g270a.t1;Em0011g273a.t1	GO:0000151(ubiquitin ligase complex);GO:0002726(positive regulation of T cell cytokine production);GO:0004842(ubiquitin-protein transferase activity);GO:0005102(receptor binding);GO:0005164(tumor necrosis factor receptor binding);GO:0005174(CD40 receptor binding);GO:0005515(protein binding);GO:0005737(cytoplasm);GO:0005829(cytosol);GO:0005938(cell cortex);GO:0006915(apoptotic process);GO:0007165(…	04141(Protein processing in endoplasmic reticulum);04141(Protein processing in endoplasmic reticulum)	K03173	EC:2.3.2.27	PREDICTED: TNF receptor-associated factor 2-like [Amphimedon queenslandica];PREDICTED: TNF receptor-associated factor 3-like [Amphimedon queenslandica]	1.53744	1.24551	1.28897	1.02775	0.613403	0.941441	1.57668	0.656891	0.0137506	0.4564	up	no
MSTRG.19083	Em0014g243a	Em0014g243a.t1	NA	NA	NA	NA		8.82673	6.75402	6.79417	10.1813	13.2556	17.2662	0.54971	-0.863258	0.0138283	0.456831	down	no
MSTRG.32388	Em0657g3a	Em0657g3a.t1	GO:0004489(methylenetetrahydrofolate reductase (NAD(P)H) activity);GO:0005829(cytosol);GO:0006730(one-carbon metabolic process)	00670(One carbon pool by folate)	K00297	EC:1.5.1.20	PREDICTED: methylenetetrahydrofolate reductase-like [Amphimedon queenslandica]	3.47515	6.64529	6.49491	3.14661	3.41585	4.07355	1.56218	0.643558	0.0138559	0.456831	up	no
MSTRG.13153	Em0008g782a	Em0008g782a.t1	GO:0002224(toll-like receptor signaling pathway);GO:0004842(ubiquitin-protein transferase activity);GO:0005164(tumor necrosis factor receptor binding);GO:0008063(Toll signaling pathway);GO:0008270(zinc ion binding);GO:0009898(cytoplasmic side of plasma membrane);GO:0016567(protein ubiquitination);GO:0019901(protein kinase binding);GO:0019903(protein phosphatase binding);GO:0030162(regulation of p…	03015(mRNA surveillance pathway)	K14401	NA	uncharacterized protein LOC106097043 [Oreochromis niloticus]	2.43597	2.41233	1.8121	3.53919	3.24005	3.54021	0.645422	-0.631685	0.0139398	0.458832	down	no
MSTRG.6494	Em0003g1672a	Em0003g1672a.t1	GO:0000981(RNA polymerase II transcription factor activity, sequence-specific DNA binding);GO:0003677(DNA binding);GO:0005654(nucleoplasm);GO:0005737(cytoplasm)	NA	NA	NA	PREDICTED: zinc finger MYM-type protein 1-like [Amphimedon queenslandica]	0.682093	1.25195	0.591872	0.556345	0.343401	0.499004	1.80584	0.852669	0.0139912	0.458994	up	no
MSTRG.11467	Em0007g528a;Em0007g546a;Em0007g556a;Em0007g561a;Em0007g529a;Em0007g534a	Em0007g528a.t1;Em0007g546a.t1;Em0007g556a.t1;Em0007g561a.t1;Em0007g529a.t1;Em0007g534a.t1	NA	NA	NA	NA	RecName: Full=Short-chain collagen C4;short-chain collagen [Ephydatia fluviatilis];PREDICTED: short-chain collagen C4 [Crassostrea gigas]	7.53793	8.07045	4.88967	10.3636	10.0059	10.8008	0.657614	-0.604687	0.014139	0.461516	down	no
MSTRG.8791	Em0005g667a	Em0005g667a.t1	GO:0000226(microtubule cytoskeleton organization);GO:0000235(astral microtubule);GO:0000278(mitotic cell cycle);GO:0003924(GTPase activity);GO:0005200(structural constituent of cytoskeleton);GO:0005525(GTP binding);GO:0005634(nucleus);GO:0005737(cytoplasm);GO:0005813(centrosome);GO:0005819(spindle);GO:0005874(microtubule);GO:0007017(microtubule-based process);GO:0007094(mitotic spindle assembly c…	04145(Phagosome)	K07374	NA	putative alpha-tubulin [Oikopleura dioica]	167.869	189.539	204.327	224.838	318.467	323.028	0.648405	-0.625034	0.0141391	0.461516	down	no
MSTRG.2167	Em0001g2827a;Em0001g2823a	Em0001g2827a.t1;Em0001g2823a.t1	NA	NA	NA	NA		81.6678	89.2824	68.7923	45.9739	60.5537	70.2978	1.35582	0.439161	0.0141614	0.461516	up	no
MSTRG.25322	Em0020g266a;Em0020g252a	Em0020g266a.t1;Em0020g252a.t1	NA	NA	NA	NA		2.29627	2.98567	5.77773	2.29597	2.40389	1.54494	1.77102	0.824581	0.0142812	0.464657	up	no
MSTRG.9926	Em0006g494a	Em0006g494a.t1	NA	NA	NA	NA	PREDICTED: uncharacterized protein LOC105313538 [Amphimedon queenslandica]	1.52741	2.60283	2.47867	3.61123	4.30947	4.62573	0.526757	-0.924791	0.0143616	0.466506	down	no
MSTRG.24732	Em0019g775a;Em0019g773a	Em0019g775a.t1;Em0019g773a.t1	GO:0000139(Golgi membrane);GO:0005789(endoplasmic reticulum membrane);GO:0006888(ER to Golgi vesicle-mediated transport);GO:0000166(nucleotide binding);GO:0004672(protein kinase activity);GO:0004674(protein serine/threonine kinase activity);GO:0005524(ATP binding);GO:0005525(GTP binding);GO:0005737(cytoplasm);GO:0005794(Golgi apparatus);GO:0006468(protein phosphorylation);GO:0006979(response to o…	05134(Legionellosis);03013(RNA transport)	K07874;K14304	NA	hypothetical protein BOX15_Mlig028052g1, partial [Macrostomum lignano];PREDICTED: uncharacterized protein LOC100640258 [Amphimedon queenslandica]	10.7346	9.59681	6.24902	7.07553	6.07101	6.03305	1.38587	0.470794	0.0145043	0.470368	up	no
MSTRG.27690	Em0022g540a	Em0022g540a.t1	NA	NA	NA	NA		1.13283	1.7674	1.24134	2.20358	2.37033	2.44806	0.589801	-0.761699	0.0145822	0.471516	down	no
MSTRG.23999	Em0018g1191a	Em0018g1191a.t1	GO:0000082(G1/S transition of mitotic cell cycle);GO:0000083(regulation of transcription involved in G1/S transition of mitotic cell cycle);GO:0000307(cyclin-dependent protein kinase holoenzyme complex);GO:0001547(antral ovarian follicle growth);GO:0001889(liver development);GO:0003713(transcription coactivator activity);GO:0005515(protein binding);GO:0005634(nucleus);GO:0005654(nucleoplasm);GO:0…	NA	NA	NA	PREDICTED: G1/S-specific cyclin-E1-like [Amphimedon queenslandica]	3.60609	3.48005	4.26496	5.99845	6.33392	6.9641	0.588247	-0.765505	0.0145874	0.471516	down	no
MSTRG.26432	Em0021g280a	Em0021g280a.t1	GO:0016021(integral component of membrane)	NA	NA	NA	hypothetical protein LOTGIDRAFT_210330 [Lottia gigantea]	0.69256	1.02239	1.21335	1.79533	1.82925	2.18306	0.504215	-0.987888	0.0150317	0.481941	down	no
MSTRG.32038	Em0447g8a	Em0447g8a.t1	GO:0000209(protein polyubiquitination);GO:0000790(nuclear chromatin);GO:0005737(cytoplasm);GO:0006281(DNA repair);GO:0016574(histone ubiquitination);GO:0031625(ubiquitin protein ligase binding);GO:0033503(HULC complex);GO:0043161(proteasome-mediated ubiquitin-dependent protein catabolic process);GO:0061630(ubiquitin protein ligase activity)	04120(Ubiquitin mediated proteolysis)	K10573	EC:2.3.2.23	PREDICTED: ubiquitin-conjugating enzyme E2 A [Amphimedon queenslandica]	24.4269	15.5965	17.2058	13.3884	13.3451	13.1272	1.43573	0.521788	0.0152856	0.486924	up	no
MSTRG.19234	Em0014g632a	Em0014g632a.t1	GO:0004601(peroxidase activity);GO:0005201(extracellular matrix structural constituent);GO:0005615(extracellular space);GO:0005783(endoplasmic reticulum);GO:0006979(response to oxidative stress);GO:0020037(heme binding);GO:0030198(extracellular matrix organization);GO:0031012(extracellular matrix);GO:0042744(hydrogen peroxide catabolic process);GO:0055114(oxidation-reduction process);GO:0070062(e…	NA	NA	NA	hemicentin-1 [Boleophthalmus pectinirostris]	2.55066	2.68726	2.95598	3.61907	4.99615	4.72492	0.614229	-0.703152	0.0155619	0.493213	down	no
MSTRG.17164	Em0012g461a	Em0012g461a.t1	GO:0007051(spindle organization)	NA	NA	NA	PREDICTED: abnormal spindle-like microcephaly-associated protein homolog, partial [Amphimedon queenslandica]	3.37991	4.8432	4.56618	6.15841	6.01451	7.78593	0.640783	-0.642092	0.0155828	0.493213	down	no
MSTRG.5979	Em0003g1306a;Em0003g1309a	Em0003g1306a.t1;Em0003g1309a.t1	GO:0000981(RNA polymerase II transcription factor activity, sequence-specific DNA binding);GO:0003677(DNA binding);GO:0005654(nucleoplasm);GO:0005737(cytoplasm);GO:0005737(cytoplasm)	00230(Purine metabolism);00232(Caffeine metabolism);00983(Drug metabolism - other enzymes);04146(Peroxisome)	K00106	EC:1.17.1.4;EC:1.17.3.2	PREDICTED: uncharacterized protein LOC105333833 [Crassostrea gigas];PREDICTED: zinc finger MYM-type protein 1-like [Amphimedon queenslandica]	1.99913	2.027	1.64243	1.31656	1.17125	1.14793	1.55912	0.640729	0.0157205	0.496252	up	no
MSTRG.5230	Em0003g375a	Em0003g375a.t1	GO:0005887(integral component of plasma membrane);GO:0007166(cell surface receptor signaling pathway)	04142(Lysosome)	K06497	NA	PREDICTED: uncharacterized protein LOC100636331 [Amphimedon queenslandica]	118.366	103.073	107.482	88.9081	82.0037	80.7818	1.30683	0.386069	0.0157289	0.496252	up	no
MSTRG.12571	Em0008g53a	Em0008g53a.t1	GO:0003824(catalytic activity);GO:0003844(1,4-alpha-glucan branching enzyme activity);GO:0004553(hydrolase activity, hydrolyzing O-glycosyl compounds);GO:0005737(cytoplasm);GO:0005975(carbohydrate metabolic process);GO:0005978(glycogen biosynthetic process);GO:0016740(transferase activity);GO:0016757(transferase activity, transferring glycosyl groups);GO:0030246(carbohydrate binding);GO:0043169(c…	00500(Starch and sucrose metabolism)	K00700	EC:2.4.1.18	PREDICTED: 1,4-alpha-glucan-branching enzyme-like [Amphimedon queenslandica]	17.2891	15.2856	13.9005	10.6179	12.0647	12.1374	1.33473	0.416545	0.0157888	0.496555	up	no
MSTRG.6469	Em0003g1644a	Em0003g1644a.t1	GO:0000981(RNA polymerase II transcription factor activity, sequence-specific DNA binding);GO:0003677(DNA binding);GO:0005654(nucleoplasm);GO:0005737(cytoplasm)	NA	NA	NA	PREDICTED: zinc finger MYM-type protein 1-like [Amphimedon queenslandica]	0.754707	0.63419	0.389625	0.286224	0.165184	0.471494	1.9271	0.946431	0.0158354	0.497233	up	no
MSTRG.4128	Em0002g1238a	Em0002g1238a.t1	GO:0000165(MAPK cascade);GO:0000186(activation of MAPKK activity);GO:0000187(activation of MAPK activity);GO:0001933(negative regulation of protein phosphorylation);GO:0003779(actin binding);GO:0003924(GTPase activity);GO:0004708(MAP kinase kinase activity);GO:0005096(GTPase activator activity);GO:0005524(ATP binding);GO:0005525(GTP binding);GO:0005615(extracellular space);GO:0005743(mitochondria…	NA	NA	NA	PREDICTED: leucine-rich repeat serine/threonine-protein kinase 2-like, partial [Amphimedon queenslandica]	4.75767	3.5718	3.43851	6.646	5.58044	5.83513	0.651549	-0.618055	0.0158812	0.497878	down	no
MSTRG.19553	Em0014g793a	Em0014g793a.t1	GO:0005887(integral component of plasma membrane);GO:0007189(adenylate cyclase-activating G-protein coupled receptor signaling pathway);GO:0007190(activation of adenylate cyclase activity);GO:0008528(G-protein coupled peptide receptor activity);GO:0009755(hormone-mediated signaling pathway)	NA	NA	NA	leucine-rich repeat-containing G-protein coupled receptor 5-like [Limulus polyphemus]	2.66025	2.70538	1.74551	4.85464	3.27266	3.77625	0.597397	-0.743238	0.0159806	0.499841	down	no
MSTRG.25324	Em0020g253a	Em0020g253a.t1	NA	NA	NA	NA		19.2444	16.8994	24.6091	12.7217	14.1731	16.9576	1.3854	0.470298	0.0160539	0.500123	up	no
MSTRG.26743	Em0021g614a	Em0021g614a.t1	GO:0005509(calcium ion binding)	03015(mRNA surveillance pathway)	K11583	NA	PREDICTED: serine/threonine-protein phosphatase 2A regulatory subunit B'' subunit beta-like [Amphimedon queenslandica]	8.66805	7.37299	8.84599	12.9673	11.933	12.6283	0.663148	-0.592598	0.0160958	0.500639	down	no
MSTRG.27142	Em0022g17a;Em0022g1a;Em0022g2a	Em0022g17a.t1;Em0022g1a.t1;Em0022g2a.t1	GO:0001523(retinoid metabolic process);GO:0001917(photoreceptor inner segment);GO:0004745(retinol dehydrogenase activity);GO:0005622(intracellular);GO:0005789(endoplasmic reticulum membrane);GO:0016021(integral component of membrane);GO:0016062(adaptation of rhodopsin mediated signaling);GO:0016616(oxidoreductase activity, acting on the CH-OH group of donors, NAD or NADP as acceptor);GO:0042572(r…	00830(Retinol metabolism);00830(Retinol metabolism)	K11153	EC:1.1.1.300	PREDICTED: dehydrogenase/reductase SDR family member on chromosome X-like [Amphimedon queenslandica];PREDICTED: retinol dehydrogenase 12-like [Amphimedon queenslandica]	1.91868	2.25355	1.41557	1.33658	0.895324	1.05825	1.69834	0.764122	0.0161707	0.502181	up	no
MSTRG.7633	Em0004g986a	Em0004g986a.t1	GO:0005737(cytoplasm);GO:0097153(cysteine-type endopeptidase activity involved in apoptotic process)	04010(MAPK signaling pathway);04210(Apoptosis);04115(p53 signaling pathway);04933(AGE-RAGE signaling pathway in diabetic complications);05168(Herpes simplex infection)	K02187	EC:3.4.22.56	PREDICTED: caspase-3-like [Nanorana parkeri]	6.35881	5.69077	5.61221	8.55841	8.50112	9.88871	0.655397	-0.60956	0.0162541	0.503979	down	no
MSTRG.27443	Em0022g285a	Em0022g285a.t1	GO:0005829(cytosol)	00010(Glycolysis / Gluconeogenesis);00030(Pentose phosphate pathway);00052(Galactose metabolism);00500(Starch and sucrose metabolism);00520(Amino sugar and nucleotide sugar metabolism);00230(Purine metabolism)	K15779	EC:5.4.2.2;EC:5.4.2.7	phosphoglucomutase-2-like [Crassostrea virginica]	14.6028	14.5025	13.5312	10.2077	10.3377	11.5863	1.32693	0.408091	0.0163117	0.504119	up	no
MSTRG.12561	Em0008g72a	Em0008g72a.t1	NA	NA	NA	NA		5.43599	6.06624	6.14023	4.04535	4.17618	4.47716	1.38931	0.474372	0.0163234	0.504119	up	no
MSTRG.23567	Em0018g851a	Em0018g851a.t1	NA	NA	NA	NA	PREDICTED: uncharacterized protein LOC109583897 isoform X2 [Amphimedon queenslandica]	5.43042	4.43279	4.6357	8.27145	6.41055	7.44829	0.655161	-0.610078	0.0163351	0.504119	down	no
MSTRG.6739	Em0004g61a	Em0004g61a.t1	NA	NA	NA	NA		9.12571	7.82802	6.23608	12.2307	12.1278	12.5322	0.628609	-0.669766	0.0164126	0.505721	down	no
MSTRG.31179	Em0144g7a	Em0144g7a.t1	GO:0003854(3-beta-hydroxy-delta5-steroid dehydrogenase activity);GO:0006694(steroid biosynthetic process);GO:0016491(oxidoreductase activity);GO:0016616(oxidoreductase activity, acting on the CH-OH group of donors, NAD or NADP as acceptor);GO:0055114(oxidation-reduction process)	NA	NA	NA	PREDICTED: tetraketide alpha-pyrone reductase 1-like [Amphimedon queenslandica]	11.7037	10.7093	9.71953	7.82382	7.76343	8.03998	1.35998	0.443583	0.0164938	0.506085	up	no
MSTRG.28503	Em0023g460a;Em0023g458a;Em0023g457a;Em0023g461a;Em0023g459a	Em0023g460a.t1;Em0023g458a.t1;Em0023g457a.t1;Em0023g461a.t1;Em0023g459a.t1	GO:0003674(molecular_function);GO:0008150(biological_process);GO:0005216(ion channel activity);GO:0016021(integral component of membrane);GO:0034220(ion transmembrane transport);GO:0008171(O-methyltransferase activity);GO:0008757(S-adenosylmethionine-dependent methyltransferase activity);GO:0019438(aromatic compound biosynthetic process);GO:0006811(ion transport);GO:0008381(mechanosensitive ion c…	00380(Tryptophan metabolism)	K00543	EC:2.1.1.4	aguA [Nephila clavipes];PREDICTED: transient receptor potential cation channel subfamily A member 1-like [Amphimedon queenslandica];PREDICTED: caffeic acid 3-O-methyltransferase-like [Amphimedon queenslandica]	7.34222	5.73002	7.87192	4.18085	5.00064	6.28951	1.35377	0.436981	0.0165011	0.506085	up	no
MSTRG.11084	Em0007g67a;Em0007g62a	Em0007g67a.t1;Em0007g62a.t1	NA	NA	NA	NA	PREDICTED: ankyrin-2-like [Amphimedon queenslandica]	5.16809	4.9412	4.70178	3.81276	3.66245	3.8337	1.30968	0.389216	0.016573	0.506904	up	no
MSTRG.24509	Em0019g641a	Em0019g641a.t1	GO:0006629(lipid metabolic process);GO:0016021(integral component of membrane);GO:0016298(lipase activity);GO:2000344(positive regulation of acrosome reaction)	00564(Glycerophospholipid metabolism);00565(Ether lipid metabolism);00590(Arachidonic acid metabolism);00591(Linoleic acid metabolism);00592(alpha-Linolenic acid metabolism)	K14621	EC:3.1.1.4;EC:3.1.1.5	PREDICTED: phospholipase B1, membrane-associated-like [Amphimedon queenslandica]	87.1614	87.8245	67.2851	56.5745	59.7731	68.2421	1.31248	0.392299	0.0166102	0.507073	up	no
MSTRG.17650	Em0012g914a	Em0012g914a.t1	GO:0005575(cellular_component);GO:0005886(plasma membrane);GO:0005929(cilium);GO:0008150(biological_process);GO:0016020(membrane);GO:0016021(integral component of membrane);GO:0031514(motile cilium);GO:0042995(cell projection)	NA	NA	NA	cilia- and flagella-associated protein 65-like [Pocillopora damicornis]	2.55369	3.23937	3.88226	4.45164	5.28803	5.78797	0.623103	-0.682456	0.0166513	0.507299	down	no
MSTRG.2723	Em0001g2866a;Em0001g2868a	Em0001g2866a.t1;Em0001g2868a.t1	GO:0005764(lysosome);GO:0005770(late endosome);GO:0005774(vacuolar membrane);GO:0008333(endosome to lysosome transport);GO:0045335(phagocytic vesicle);GO:0090385(phagosome-lysosome fusion);GO:0090385(phagosome-lysosome fusion)	04144(Endocytosis);04145(Phagosome);04140(Autophagy - animal);04137(Mitophagy - animal);04137(Mitophagy - animal)	K07897	NA	PREDICTED: ras-related protein rab7-like [Amphimedon queenslandica]	42.8229	39.1641	40.279	29.5776	26.0027	38.1674	1.3042	0.383168	0.0167219	0.507605	up	no
MSTRG.15027	Em0010g170a;Em0010g169a	Em0010g170a.t1;Em0010g169a.t1	GO:0003674(molecular_function);GO:0005575(cellular_component);GO:0008150(biological_process)	03410(Base excision repair)	K10798	EC:2.4.2.30	PREDICTED: von Willebrand factor A domain-containing protein 5A-like [Amphimedon queenslandica]	3.3251	2.90567	7.20113	9.31875	7.76648	8.09827	0.533361	-0.906816	0.0169353	0.509914	down	no
MSTRG.13228	Em0008g728a;Em0008g729a	Em0008g728a.t1;Em0008g729a.t1	GO:0000935(division septum);GO:0005509(calcium ion binding);GO:0005515(protein binding);GO:0005634(nucleus);GO:0005829(cytosol);GO:0030437(ascospore formation);GO:0031322(ascospore-type prospore-specific spindle pole body remodeling);GO:0032153(cell division site);GO:0035840(old growing cell tip);GO:0035841(new growing cell tip);GO:0035974(meiotic spindle pole body);GO:0043332(mating projection t…	04371(Apelin signaling pathway);04020(Calcium signaling pathway);04070(Phosphatidylinositol signaling system);04114(Oocyte meiosis);04218(Cellular senescence);04625(C-type lectin receptor signaling pathway);04910(Insulin signaling pathway);04912(GnRH signaling pathway);04916(Melanogenesis);04261(Adrenergic signaling in cardiomyocytes);04270(Vascular smooth muscle contraction);04744(Phototransduct…	K02183	NA	calmodulin-like isoform X1 [Centruroides sculpturatus]	13.8913	17.138	12.5568	19.8174	23.9032	22.4606	0.658586	-0.602556	0.0170958	0.512408	down	no
MSTRG.28985	Em0023g937a	Em0023g937a.t1	GO:0005643(nuclear pore);GO:0005654(nucleoplasm);GO:0005829(cytosol);GO:0006607(NLS-bearing protein import into nucleus);GO:0008139(nuclear localization sequence binding)	NA	NA	NA	PREDICTED: importin subunit alpha-1-like [Amphimedon queenslandica]	14.251	14.7534	14.6623	19.8603	20.6774	22.8882	0.688467	-0.53854	0.0171979	0.514688	down	no
MSTRG.26123	Em0020g1084a	Em0020g1084a.t1	NA	NA	NA	NA	PREDICTED: ankyrin repeat and SOCS box protein 13-like [Amphimedon queenslandica]	21.9888	18.0374	20.5978	14.1235	15.3535	15.1706	1.35783	0.441308	0.0172796	0.516351	up	no
MSTRG.18746	Em0013g1038a	Em0013g1038a.t1	GO:0003735(structural constituent of ribosome);GO:0005840(ribosome);GO:0006412(translation)	03320(PPAR signaling pathway)	K08770	NA	polyubiquitin-B [Astatotilapia calliptera]	9.86387	9.42954	8.68223	5.78241	5.52013	7.50837	1.4872	0.572602	0.0173305	0.517091	up	no
MSTRG.25821	Em0020g827a	Em0020g827a.t1	GO:0005829(cytosol);GO:0008093(cytoskeletal adaptor activity);GO:0008286(insulin receptor signaling pathway);GO:0015629(actin cytoskeleton);GO:0030838(positive regulation of actin filament polymerization);GO:0051017(actin filament bundle assembly);GO:0051764(actin crosslink formation);GO:2000251(positive regulation of actin cytoskeleton reorganization)	NA	NA	NA	brain-specific angiogenesis inhibitor 1-associated protein 2-like protein 1 [Pocillopora damicornis]	18.0698	18.5524	15.8149	26.0732	27.1663	24.8929	0.671132	-0.575332	0.0175547	0.522632	down	no
MSTRG.18559	Em0013g791a;Em0013g790a	Em0013g791a.t1;Em0013g790a.t1	GO:0005246(calcium channel regulator activity);GO:0005891(voltage-gated calcium channel complex);GO:0051924(regulation of calcium ion transport);GO:0070588(calcium ion transmembrane transport);GO:0070588(calcium ion transmembrane transport)	NA	NA	NA	PREDICTED: uncharacterized protein LOC102801576 [Saccoglossus kowalevskii]	31.8261	22.6692	28.9056	22.429	19.4281	21.3898	1.31866	0.39907	0.0176292	0.523634	up	no
MSTRG.17524	Em0012g581a	Em0012g581a.t1	GO:0000788(nuclear nucleosome);GO:0006334(nucleosome assembly);GO:0031492(nucleosomal DNA binding);GO:0046982(protein heterodimerization activity)	NA	NA	NA	histone H3-like [Kryptolebias marmoratus]	4.90526	10.9415	9.31441	14.2036	13.3382	20.3685	0.525174	-0.929134	0.0177396	0.526125	down	no
MSTRG.10175	Em0006g572a	Em0006g572a.t1	NA	NA	NA	NA		2.7722	2.2845	1.78838	3.47792	3.83262	4.19524	0.594926	-0.749218	0.0177832	0.526627	down	no
MSTRG.30967	Em0113g1a	Em0113g1a.t1	GO:0005634(nucleus);GO:0005737(cytoplasm);GO:0016567(protein ubiquitination);GO:0019941(modification-dependent protein catabolic process);GO:0031386(protein tag);GO:0031625(ubiquitin protein ligase binding);GO:0070628(proteasome binding)	NA	NA	NA	polyubiquitin-A [Trichoplusia ni]	0.590384	0.704448	0.781365	1.3007	1.55667	1.15806	0.517056	-0.951608	0.0179955	0.530531	down	no
MSTRG.22267	Em0017g211a	Em0017g211a.t1	GO:0004672(protein kinase activity);GO:0004674(protein serine/threonine kinase activity);GO:0005515(protein binding);GO:0005524(ATP binding);GO:0005737(cytoplasm);GO:0005765(lysosomal membrane);GO:0005795(Golgi stack);GO:0006914(autophagy);GO:0007528(neuromuscular junction development);GO:0008088(axo-dendritic transport);GO:0009267(cellular response to starvation);GO:0017137(Rab GTPase binding);G…	03013(RNA transport)	K14304	NA	PREDICTED: leucine-rich repeat serine/threonine-protein kinase 1 [Galendromus occidentalis]	5.24933	4.80161	3.99865	3.34226	3.2474	4.05097	1.32037	0.400944	0.0180711	0.531969	up	no
MSTRG.9757	Em0005g1588a	Em0005g1588a.t1	GO:0005739(mitochondrion);GO:0005743(mitochondrial inner membrane);GO:0005783(endoplasmic reticulum);GO:0097194(execution phase of apoptosis)	NA	NA	NA	PREDICTED: apoptosis-inducing factor 3-like [Amphimedon queenslandica]	1.7904	1.39143	1.78617	2.51384	3.07655	2.70995	0.598529	-0.740506	0.0181852	0.534533	down	no
MSTRG.7240	Em0004g663a	Em0004g663a.t1	NA	NA	NA	NA	N-chimaerin [Cryptotermes secundus]	3.51667	2.7747	6.539	2.26793	2.70448	2.96345	1.61676	0.693105	0.0182964	0.535412	up	no
MSTRG.10893	Em0006g1229a	Em0006g1229a.t1	NA	NA	NA	NA	PREDICTED: uncharacterized protein YMR317W-like [Amphimedon queenslandica]	13.8973	9.64834	13.2985	8.58059	8.2632	8.90661	1.43082	0.51684	0.0184003	0.536075	up	no
MSTRG.2020	Em0001g2485a	Em0001g2485a.t1	GO:0004674(protein serine/threonine kinase activity);GO:0005634(nucleus);GO:0005737(cytoplasm);GO:0008360(regulation of cell shape);GO:0018105(peptidyl-serine phosphorylation)	NA	NA	NA	PREDICTED: uncharacterized protein K02A2.6-like [Cyprinus carpio]	1.83051	1.99837	4.13557	1.06485	1.57821	1.85627	1.77014	0.823866	0.0184366	0.536341	up	no
MSTRG.24090	Em0019g119a	Em0019g119a.t1	GO:0000170(sphingosine hydroxylase activity);GO:0006629(lipid metabolic process);GO:0016020(membrane);GO:0016021(integral component of membrane);GO:0030148(sphingolipid biosynthetic process);GO:0042284(sphingolipid delta-4 desaturase activity);GO:0046513(ceramide biosynthetic process)	00600(Sphingolipid metabolism)	K04712	EC:1.14.19.17;EC:1.14.18.5	PREDICTED: sphingolipid delta(4)-desaturase DES1-like [Amphimedon queenslandica]	17.1689	15.4282	18.647	11.7163	11.9156	14.556	1.34189	0.424265	0.0185818	0.538982	up	no
MSTRG.27538	Em0022g404a	Em0022g404a.t1	NA	NA	NA	NA		3.22017	3.56802	1.76286	3.26751	4.82295	6.94803	0.568611	-0.814486	0.0187623	0.543246	down	no
MSTRG.27293	Em0022g154a;Em0022g155a	Em0022g154a.t1;Em0022g155a.t1	GO:0005739(mitochondrion);GO:0006412(translation);GO:0005515(protein binding);GO:0005654(nucleoplasm);GO:0005737(cytoplasm);GO:0006605(protein targeting);GO:0006974(cellular response to DNA damage stimulus);GO:0008286(insulin receptor signaling pathway);GO:0010838(positive regulation of keratinocyte proliferation);GO:0019905(syntaxin binding);GO:0045111(intermediate filament cytoskeleton);GO:0050…	03010(Ribosome)	K02939	NA	PREDICTED: uncharacterized protein LOC105314146 [Amphimedon queenslandica];syntaxin-binding protein 4-like isoform X3 [Acanthaster planci]	3.68578	3.40969	3.68314	4.41819	6.22764	6.0954	0.643836	-0.635234	0.0188156	0.543246	down	no
MSTRG.18151	Em0013g302a	Em0013g302a.t1	GO:0003682(chromatin binding);GO:0005515(protein binding);GO:0005634(nucleus);GO:0006261(DNA-dependent DNA replication);GO:0007062(sister chromatid cohesion);GO:0042555(MCM complex)	NA	NA	NA	PREDICTED: mini-chromosome maintenance complex-binding protein-like [Branchiostoma belcheri]	1.24687	1.07247	0.844135	1.95594	1.77204	2.38472	0.517526	-0.950297	0.0188202	0.543246	down	no
MSTRG.18236	Em0013g355a	Em0013g355a.t1	GO:0003723(RNA binding);GO:0003729(mRNA binding);GO:0005634(nucleus);GO:0005737(cytoplasm);GO:0006398(mRNA 3'-end processing by stem-loop binding and cleavage);GO:0051028(mRNA transport);GO:0071204(histone pre-mRNA 3'end processing complex);GO:0071207(histone pre-mRNA stem-loop binding)	NA	NA	NA	PREDICTED: histone RNA hairpin-binding protein-like [Amphimedon queenslandica]	11.4933	14.5624	15.9895	17.8976	22.4914	27.1969	0.6221	-0.684783	0.0188387	0.543246	down	no
MSTRG.9691	Em0005g1608a	Em0005g1608a.t1	GO:0005739(mitochondrion);GO:0005802(trans-Golgi network);GO:0032438(melanosome organization);GO:0042470(melanosome)	NA	NA	NA	PREDICTED: ras-related protein Rab-32-like [Amphimedon queenslandica]	28.599	25.2902	26.2612	17.1825	20.0862	23.5977	1.31683	0.397066	0.0193649	0.55438	up	no
MSTRG.16060	Em0011g256a;Em0011g259a	Em0011g256a.t1;Em0011g259a.t1	GO:0000151(ubiquitin ligase complex);GO:0002726(positive regulation of T cell cytokine production);GO:0004842(ubiquitin-protein transferase activity);GO:0005102(receptor binding);GO:0005164(tumor necrosis factor receptor binding);GO:0005174(CD40 receptor binding);GO:0005515(protein binding);GO:0005737(cytoplasm);GO:0005829(cytosol);GO:0005938(cell cortex);GO:0006915(apoptotic process);GO:0007165(…	04141(Protein processing in endoplasmic reticulum);04141(Protein processing in endoplasmic reticulum)	K03173	EC:2.3.2.27	PREDICTED: TNF receptor-associated factor 3-like [Amphimedon queenslandica]	0.326768	0.391175	0.419338	0.204378	0.21153	0.210717	1.81493	0.859915	0.0195934	0.558497	up	no
MSTRG.17593	Em0012g774a;Em0012g780a	Em0012g774a.t1;Em0012g780a.t1	GO:0000407(phagophore assembly site);GO:0005776(autophagosome);GO:0016236(macroautophagy);GO:0043130(ubiquitin binding);GO:0043130(ubiquitin binding)	04137(Mitophagy - animal);04137(Mitophagy - animal)	K17987	NA	PREDICTED: next to BRCA1 gene 1 protein-like [Amphimedon queenslandica]	17.3503	16.6988	18.0836	14.5644	13.0394	12.5894	1.29705	0.375239	0.0196465	0.559204	up	no
MSTRG.30587	Em0071g23a	Em0071g23a.t1	GO:0005515(protein binding)	04210(Apoptosis)	K02374	NA	protein tyrosine phosphatase, non-receptor type 13 (APO-1/CD95 (Fas)-associated phosphatase), isoform CRA_c [Homo sapiens]	5.65734	6.34803	6.05811	7.72428	8.59509	10.8024	0.666014	-0.586376	0.0198873	0.564433	down	no
MSTRG.17243	Em0012g530a	Em0012g530a.t1	GO:0004222(metalloendopeptidase activity);GO:0006508(proteolysis);GO:0007229(integrin-mediated signaling pathway);GO:0008237(metallopeptidase activity);GO:0016020(membrane);GO:0016021(integral component of membrane);GO:0046872(metal ion binding)	NA	NA	NA	PREDICTED: disintegrin and metalloproteinase domain-containing protein 28-like [Amphimedon queenslandica]	17.1237	18.8359	18.8054	24.309	24.3773	31.9547	0.67912	-0.558261	0.0202385	0.572722	down	no
MSTRG.14723	Em0009g1170a;Em0009g1167a	Em0009g1170a.t1;Em0009g1167a.t1	GO:0003674(molecular_function);GO:0016020(membrane);GO:0016021(integral component of membrane);GO:0016021(integral component of membrane)	NA	NA	NA	PREDICTED: major facilitator superfamily domain-containing protein 12-like [Amphimedon queenslandica]	3.77513	4.06059	3.86924	2.80991	2.82745	3.26501	1.31481	0.394859	0.0202472	0.572722	up	no
MSTRG.15831	Em0011g6a	Em0011g6a.t1	GO:0005887(integral component of plasma membrane);GO:0007367(segment polarity determination);GO:0008587(imaginal disc-derived wing margin morphogenesis);GO:0017147(Wnt-protein binding);GO:0030177(positive regulation of Wnt signaling pathway);GO:0030285(integral component of synaptic vesicle membrane);GO:0031227(intrinsic component of endoplasmic reticulum membrane);GO:0031228(intrinsic component …	NA	NA	NA	PREDICTED: protein wntless homolog [Branchiostoma belcheri]	6.27184	6.58606	6.10557	5.11837	4.53846	5.18176	1.27798	0.353869	0.0205911	0.57942	up	no
MSTRG.17602	Em0012g791a	Em0012g791a.t1	NA	NA	NA	NA		42.7373	48.7545	28.2611	58.9236	48.0772	82.5907	0.631636	-0.662834	0.020693	0.581461	down	no
MSTRG.31671	Em0272g4a;Em0272g2a	Em0272g4a.t1;Em0272g2a.t1	GO:0005813(centrosome);GO:0007346(regulation of mitotic cell cycle);GO:0030496(midbody)	NA	NA	NA	PREDICTED: tetratricopeptide repeat protein 28-like [Amphimedon queenslandica];PREDICTED: uncharacterized protein LOC109581828 [Amphimedon queenslandica]	0.964794	0.810127	0.625399	1.24939	1.26673	1.37696	0.616561	-0.697684	0.020916	0.586737	down	no
MSTRG.27149	Em0022g9a	Em0022g9a.t1	GO:0004322(ferroxidase activity);GO:0005381(iron ion transmembrane transporter activity);GO:0005507(copper ion binding);GO:0006826(iron ion transport);GO:0033215(iron assimilation by reduction and transport);GO:0033573(high-affinity iron permease complex)	00053(Ascorbate and aldarate metabolism)	K00423	EC:1.10.3.3	laccase-4-like [Orbicella faveolata]	5.77252	6.90538	5.39557	4.11769	4.2862	4.85075	1.36356	0.447375	0.0209739	0.586854	up	no
MSTRG.16280	Em0011g512a	Em0011g512a.t1	GO:0004553(hydrolase activity, hydrolyzing O-glycosyl compounds);GO:0005575(cellular_component);GO:0005975(carbohydrate metabolic process)	00052(Galactose metabolism);00500(Starch and sucrose metabolism)	K12317	EC:3.2.1.20	PREDICTED: uncharacterized protein LOC105315496, partial [Amphimedon queenslandica]	12.0303	13.5488	11.5987	7.39342	9.51863	10.9773	1.33305	0.414728	0.0210367	0.58778	up	no
MSTRG.17492	Em0012g759a;Em0012g754a	Em0012g759a.t1;Em0012g754a.t1	GO:0002046(opsin binding);GO:0005543(phospholipid binding);GO:0005875(microtubule associated complex);GO:0007030(Golgi organization);GO:0007041(lysosomal transport);GO:0008022(protein C-terminus binding);GO:0019894(kinesin binding);GO:0030507(spectrin binding);GO:0030863(cortical cytoskeleton);GO:0032029(myosin tail binding);GO:0032391(photoreceptor connecting cilium);GO:0034452(dynactin binding)…	NA	NA	NA	unnamed protein product [Hymenolepis nana];filamin-A isoform X6, partial [Brachionus plicatilis]	11.8225	7.84035	9.48895	8.44734	6.35631	7.16935	1.32671	0.407854	0.0210847	0.58829	up	no
MSTRG.14967	Em0010g73a	Em0010g73a.t1	GO:0004768(stearoyl-CoA 9-desaturase activity);GO:0005506(iron ion binding);GO:0005789(endoplasmic reticulum membrane);GO:0006636(unsaturated fatty acid biosynthetic process);GO:0016021(integral component of membrane);GO:0016491(oxidoreductase activity)	01040(Biosynthesis of unsaturated fatty acids)	K00507	EC:1.14.19.1	PREDICTED: acyl-CoA desaturase-like [Amphimedon queenslandica]	7.48282	7.32111	5.64442	4.67105	4.02021	4.77627	1.51834	0.602499	0.0214033	0.595499	up	no
MSTRG.14907	Em0010g47a	Em0010g47a.t1	GO:0004768(stearoyl-CoA 9-desaturase activity);GO:0005506(iron ion binding);GO:0005789(endoplasmic reticulum membrane);GO:0006636(unsaturated fatty acid biosynthetic process);GO:0016021(integral component of membrane);GO:0016491(oxidoreductase activity)	01040(Biosynthesis of unsaturated fatty acids)	K00507	EC:1.14.19.1	PREDICTED: acyl-CoA desaturase-like [Amphimedon queenslandica]	5.58479	5.54637	4.12508	3.27058	3.15396	3.33597	1.56306	0.644371	0.0216139	0.59886	up	no
MSTRG.17769	Em0012g999a	Em0012g999a.t1	NA	NA	NA	NA	PREDICTED: mucin-17-like [Amphimedon queenslandica]	21.9413	17.2408	9.31179	9.26941	14.0728	6.01345	1.65194	0.724162	0.0217879	0.602285	up	no
MSTRG.453	Em0001g548a	Em0001g548a.t1	GO:0016021(integral component of membrane)	00515(Mannose type O-glycan biosyntheis)	K09666	EC:2.4.1.-	protein O-linked-mannose beta-1,2-N-acetylglucosaminyltransferase 1 [Halyomorpha halys]	4.55102	4.69422	4.75489	3.18546	2.82415	2.52187	1.64099	0.714571	0.0218852	0.602344	up	no
MSTRG.5978	Em0003g1307a	Em0003g1307a.t1	NA	NA	NA	NA	aggregation factor protein 3, form C, partial [Clathria prolifera]	16.86	13.3879	14.3	12.5449	10.477	11.5872	1.28717	0.364199	0.0218925	0.602344	up	no
MSTRG.10315	Em0006g587a	Em0006g587a.t1	NA	NA	NA	NA	Retrovirus-related Pol polyprotein from type-2 retrotransposable element R2DM [Folsomia candida]	3.46438	2.43385	3.43347	2.76076	1.51328	1.96875	1.4948	0.579949	0.0218947	0.602344	up	no
MSTRG.3412	Em0002g105a	Em0002g105a.t1	NA	NA	NA	NA		6.54279	6.27229	5.97675	8.40486	9.96748	10.1001	0.66	-0.599461	0.0219234	0.602344	down	no
MSTRG.9662	Em0005g1515a;Em0005g1516a;Em0005g1517a	Em0005g1515a.t1;Em0005g1516a.t1;Em0005g1517a.t1	GO:0016020(membrane);GO:0046872(metal ion binding);GO:0000166(nucleotide binding);GO:0004386(helicase activity);GO:0005515(protein binding);GO:0005524(ATP binding);GO:0005634(nucleus);GO:0016787(hydrolase activity);GO:0046872(metal ion binding)	04141(Protein processing in endoplasmic reticulum);04140(Autophagy - animal);04137(Mitophagy - animal);04137(Mitophagy - animal)	K08860	EC:2.7.11.1	PREDICTED: helicase with zinc finger domain 2-like, partial [Amphimedon queenslandica];PREDICTED: uncharacterized protein LOC109585004, partial [Amphimedon queenslandica]	1.4785	1.23233	1.32032	2.27588	1.7725	2.49199	0.616348	-0.698184	0.0221651	0.608141	down	no
MSTRG.15118	Em0010g282a	Em0010g282a.t1	NA	04141(Protein processing in endoplasmic reticulum);04140(Autophagy - animal)	K08852	EC:2.7.11.1;EC:3.1.26.-	ATP N-glycosidase 1 [Ephydatia muelleri]	1.84928	3.45449	4.78558	7.35662	6.93668	5.14653	0.519004	-0.946182	0.0222886	0.609105	down	no
MSTRG.30320	Em0052g10a	Em0052g10a.t1	GO:0003677(DNA binding);GO:0003723(RNA binding);GO:0005634(nucleus);GO:0008283(cell proliferation);GO:0031618(nuclear pericentric heterochromatin);GO:0046982(protein heterodimerization activity);GO:0051260(protein homooligomerization)	NA	NA	NA	PREDICTED: chromobox protein homolog 5 [Drosophila busckii]	3.3085	3.77637	3.81356	5.67932	6.05831	7.53969	0.56535	-0.822783	0.0222926	0.609105	down	no
MSTRG.417	Em0001g528a	Em0001g528a.t1	NA	NA	NA	NA	ABC transporter F family member 4-like [Lingula anatina]	1.85214	1.77167	1.71798	2.48561	2.62131	2.7256	0.682001	-0.552155	0.0224308	0.611192	down	no
MSTRG.31171	Em0142g5a;Em0142g6a;Em0142g7a	Em0142g5a.t1;Em0142g6a.t1;Em0142g7a.t1	GO:0005576(extracellular region);GO:0008233(peptidase activity);GO:0019835(cytolysis);GO:0019835(cytolysis)	04512(ECM-receptor interaction);04510(Focal adhesion);04510(Focal adhesion)	K06252	NA	fibroleukin [Terrapene mexicana triunguis];ryncolin-1-like [Exaiptasia pallida]	3.38289	2.19053	3.72563	4.93395	5.77211	4.67988	0.604387	-0.726456	0.022541	0.612004	down	no
MSTRG.21635	Em0016g705a	Em0016g705a.t1	NA	NA	NA	NA	follicular epithelium yolk protein subunit, partial [Cadra cautella]	9.90791	15.4931	10.6504	19.5599	18.0551	20.1876	0.6237	-0.681077	0.0225623	0.612004	down	no
MSTRG.25663	Em0020g422a	Em0020g422a.t1	NA	NA	NA	NA		8.12292	8.56726	5.7275	4.25584	5.10787	5.08878	1.55113	0.633319	0.0232205	0.624709	up	no
MSTRG.9585	Em0005g1442a	Em0005g1442a.t1	GO:0004674(protein serine/threonine kinase activity);GO:0005524(ATP binding);GO:0006468(protein phosphorylation)	NA	NA	NA	PREDICTED: serine/threonine-protein kinase RIO3-like [Amphimedon queenslandica]	12.9364	14.3257	32.4322	13.8807	12.2639	12.1081	1.56052	0.642029	0.0232426	0.624709	up	no
MSTRG.2144	Em0001g2661a	Em0001g2661a.t1	GO:0000305(response to oxygen radical);GO:0004791(thioredoxin-disulfide reductase activity);GO:0005515(protein binding);GO:0005634(nucleus);GO:0005654(nucleoplasm);GO:0005737(cytoplasm);GO:0005739(mitochondrion);GO:0005783(endoplasmic reticulum);GO:0005829(cytosol);GO:0006749(glutathione metabolic process);GO:0007275(multicellular organism development);GO:0007283(spermatogenesis);GO:0009055(elect…	00450(Selenocompound metabolism)	K22182	EC:1.8.1.9	thioredoxin reductase 1, cytoplasmic-like isoform X1 [Orbicella faveolata]	49.4461	45.7562	44.8861	37.2633	34.3515	39.0952	1.26536	0.339552	0.0237376	0.633707	up	no
MSTRG.25622	Em0020g368a	Em0020g368a.t1	GO:0005634(nucleus);GO:0006281(DNA repair);GO:0016301(kinase activity)	03450(Non-homologous end-joining)	K06642	EC:2.7.11.1	DNA-dependent protein kinase catalytic subunit-like [Orbicella faveolata]	1.73291	2.36831	2.34385	3.30092	3.51043	3.55899	0.621491	-0.686196	0.0238318	0.634509	down	no
MSTRG.5036	Em0003g293a	Em0003g293a.t1	GO:0005783(endoplasmic reticulum);GO:0006629(lipid metabolic process);GO:0006631(fatty acid metabolic process);GO:0006633(fatty acid biosynthetic process);GO:0006636(unsaturated fatty acid biosynthetic process);GO:0009922(fatty acid elongase activity);GO:0016020(membrane);GO:0016021(integral component of membrane);GO:0016740(transferase activity);GO:0019367(fatty acid elongation, saturated fatty …	00062(Fatty acid elongation)	K10249	EC:2.3.1.199	PREDICTED: elongation of very long chain fatty acids protein 4-like isoform X2 [Amphimedon queenslandica]	6.44892	5.7545	4.6163	8.78026	9.67544	8.92908	0.614199	-0.703222	0.0238955	0.63535	down	no
MSTRG.10722	Em0006g1042a	Em0006g1042a.t1	GO:0005730(nucleolus);GO:0022627(cytosolic small ribosomal subunit);GO:0070062(extracellular exosome)	03010(Ribosome)	K02975	NA	40S ribosomal protein S25 [Sycon ciliatum]	48.2865	46.5485	47.4921	73.4098	79.3536	56.9042	0.678823	-0.558893	0.0240226	0.635961	down	no
MSTRG.29700	Em0028g23a	Em0028g23a.t1	NA	NA	NA	NA		12.6588	12.5021	11.1237	17.7346	16.2362	19.3202	0.680878	-0.554532	0.0240512	0.635961	down	no
MSTRG.15120	Em0010g283a	Em0010g283a.t1	NA	NA	NA	NA	ATP N-glycosidase 1 [Ephydatia muelleri]	7.13032	14.2575	28.5122	34.4732	36.5586	28.3043	0.502334	-0.99328	0.0240608	0.635961	down	no
MSTRG.9772	Em0005g1651a	Em0005g1651a.t1	NA	NA	NA	NA		19.7024	25.2815	25.5948	34.3277	34.4963	35.3643	0.677414	-0.56189	0.0241113	0.635961	down	no
MSTRG.28526	Em0023g494a	Em0023g494a.t1	GO:0016020(membrane)	NA	NA	NA	PREDICTED: dual oxidase maturation factor 1-like [Amphimedon queenslandica]	93.8635	80.3386	59.9512	57.4746	58.9568	62.7319	1.30693	0.386178	0.0243665	0.640131	up	no
MSTRG.4630	Em0002g1789a;Em0002g1753a;Em0002g1788a	Em0002g1789a.t1;Em0002g1753a.t1;Em0002g1788a.t1	NA	NA	NA	NA		1.22591	1.00394	1.43956	0.93364	0.645039	0.810365	1.53594	0.619117	0.0244397	0.640352	up	no
MSTRG.7639	Em0004g1001a	Em0004g1001a.t1	NA	NA	NA	NA		1.08134	1.02313	1.30909	1.10511	2.47587	2.6452	0.548259	-0.86707	0.0247175	0.644217	down	no
MSTRG.937	Em0001g1100a	Em0001g1100a.t1	GO:0003779(actin binding);GO:0008290(F-actin capping protein complex);GO:0051016(barbed-end actin filament capping);GO:0070062(extracellular exosome);GO:0071203(WASH complex)	04144(Endocytosis)	K10364	NA	F-actin-capping protein subunit alpha [Caligus rogercresseyi]	21.941	21.0891	21.8584	16.7359	17.0875	17.3599	1.26777	0.34229	0.0249587	0.647701	up	no
MSTRG.22259	Em0017g178a	Em0017g178a.t1	NA	NA	NA	NA		25.0966	14.3877	18.7404	17.0329	11.1284	12.2031	1.44247	0.528543	0.0250146	0.647701	up	no
MSTRG.22404	Em0017g354a	Em0017g354a.t1	GO:0006508(proteolysis);GO:0008233(peptidase activity);GO:0009986(cell surface);GO:0010952(positive regulation of peptidase activity);GO:0016504(peptidase activator activity);GO:0070062(extracellular exosome)	04512(ECM-receptor interaction);04510(Focal adhesion)	K06252	NA	fibroleukin [Terrapene mexicana triunguis]	8.73381	7.3521	6.18446	12.1029	13.8177	10.7269	0.607692	-0.718587	0.0252945	0.650684	down	no
MSTRG.16436	Em0011g690a;Em0011g689a	Em0011g690a.t1;Em0011g689a.t1	GO:0005003(ephrin receptor activity);GO:0005524(ATP binding);GO:0005887(integral component of plasma membrane);GO:0018108(peptidyl-tyrosine phosphorylation);GO:0048013(ephrin receptor signaling pathway)	NA	NA	NA	PREDICTED: uncharacterized protein LOC109584225 [Amphimedon queenslandica]	1.00805	1.66142	1.26857	2.28947	2.32115	2.40725	0.561143	-0.83356	0.0253788	0.652004	down	no
MSTRG.17482	Em0012g746a;Em0012g747a;Em0012g744a	Em0012g746a.t1;Em0012g747a.t1;Em0012g744a.t1	NA	NA	NA	NA	PREDICTED: uncharacterized protein LOC105848944 [Hydra vulgaris]	0.940561	0.410479	0.488295	0.497402	0.24924	0.286524	1.78029	0.832112	0.0254789	0.653728	up	no
MSTRG.18256	Em0013g376a	Em0013g376a.t1	NA	NA	NA	NA		15.1393	27.5533	23.7301	26.8349	37.4852	45.7682	0.603358	-0.728913	0.0259745	0.661296	down	no
MSTRG.17599	Em0012g792a	Em0012g792a.t1	NA	NA	NA	NA		66.3632	78.632	48.9644	91.2512	74.3635	133.39	0.648685	-0.624411	0.0260394	0.661484	down	no
MSTRG.19989	Em0015g65a	Em0015g65a.t1	GO:0005089(Rho guanyl-nucleotide exchange factor activity);GO:0035023(regulation of Rho protein signal transduction);GO:0046872(metal ion binding)	NA	NA	NA	PREDICTED: rho guanine nucleotide exchange factor 39-like isoform X2 [Amphimedon queenslandica]	2.66816	1.80652	2.64588	3.50511	4.08614	5.05677	0.562978	-0.828849	0.0260881	0.661484	down	no
MSTRG.11475	Em0007g545a;Em0007g536a;Em0007g543a;Em0007g553a	Em0007g545a.t1;Em0007g536a.t1;Em0007g543a.t1;Em0007g553a.t1	NA	NA	NA	NA	Non-fibrillar collagen EmC13, partial [Ephydatia muelleri]	6.17155	9.20245	5.33276	9.12064	10.6535	11.751	0.656833	-0.606402	0.0262416	0.661484	down	no
MSTRG.23654	Em0018g931a	Em0018g931a.t1	GO:0005509(calcium ion binding);GO:0005576(extracellular region);GO:0007155(cell adhesion);GO:0008201(heparin binding);GO:0016525(negative regulation of angiogenesis);GO:0030198(extracellular matrix organization);GO:0031012(extracellular matrix)	04350(TGF-beta signaling pathway);04512(ECM-receptor interaction);04145(Phagosome)	K16857	NA	PREDICTED: cartilage oligomeric matrix protein-like isoform X2 [Amphimedon queenslandica]	33.688	36.5333	30.3281	46.7089	46.5707	49.5617	0.703924	-0.506508	0.026248	0.661484	down	no
MSTRG.21145	Em0016g148a	Em0016g148a.t1	GO:0006750(glutathione biosynthetic process);GO:0017109(glutamate-cysteine ligase complex);GO:0030234(enzyme regulator activity);GO:0035229(positive regulation of glutamate-cysteine ligase activity)	00270(Cysteine and methionine metabolism);00480(Glutathione metabolism)	K11205	NA	PREDICTED: glutamate--cysteine ligase regulatory subunit isoform X1 [Crassostrea gigas]	11.9981	11.3048	13.283	9.38798	7.79687	9.20109	1.38657	0.471522	0.0262743	0.661484	up	no
MSTRG.18255	Em0013g375a	Em0013g375a.t1	NA	NA	NA	NA	PREDICTED: uncharacterized protein LOC105316609 [Amphimedon queenslandica]	17.0517	32.4847	27.288	33.1115	46.6307	46.3778	0.609137	-0.715161	0.0269345	0.674063	down	no
MSTRG.23823	Em0018g1061a	Em0018g1061a.t1	GO:0005615(extracellular space);GO:0005739(mitochondrion);GO:0005764(lysosome);GO:0006631(fatty acid metabolic process);GO:0006650(glycerophospholipid metabolic process);GO:0006672(ceramide metabolic process);GO:0008374(O-acyltransferase activity);GO:0016020(membrane);GO:0034638(phosphatidylcholine catabolic process);GO:0046338(phosphatidylethanolamine catabolic process);GO:0047499(calcium-indepe…	00564(Glycerophospholipid metabolism);04142(Lysosome)	K06129	EC:3.1.1.5	hypothetical protein LOTGIDRAFT_220528 [Lottia gigantea]	113.487	90.326	80.7802	66.4778	76.0412	76.272	1.30075	0.379346	0.0269908	0.674155	up	no
MSTRG.24718	Em0019g760a	Em0019g760a.t1	NA	NA	NA	NA	PREDICTED: uncharacterized protein LOC109581780 [Amphimedon queenslandica]	8.16168	6.1165	10.0028	5.5863	5.9822	6.26902	1.36123	0.44491	0.0271616	0.676265	up	no
MSTRG.10412	Em0006g744a	Em0006g744a.t1	GO:0006820(anion transport);GO:0016021(integral component of membrane);GO:0022857(transmembrane transporter activity);GO:0055085(transmembrane transport)	NA	NA	NA	PREDICTED: sugar phosphate exchanger 2 [Galeopterus variegatus]	2.89203	1.61197	1.53467	1.21035	0.988628	1.3669	1.69346	0.759974	0.0275653	0.682474	up	no
MSTRG.32688	Em0876g1a;Em0876g3a	Em0876g1a.t1;Em0876g3a.t1	GO:0004367(glycerol-3-phosphate dehydrogenase [NAD+] activity);GO:0004368(glycerol-3-phosphate dehydrogenase activity);GO:0005737(cytoplasm);GO:0005739(mitochondrion);GO:0005829(cytosol);GO:0005975(carbohydrate metabolic process);GO:0006072(glycerol-3-phosphate metabolic process);GO:0006094(gluconeogenesis);GO:0006116(NADH oxidation);GO:0006127(glycerophosphate shuttle);GO:0006734(NADH metabolic …	00564(Glycerophospholipid metabolism);00564(Glycerophospholipid metabolism)	K00006	EC:1.1.1.8	PREDICTED: glycerol-3-phosphate dehydrogenase 1-like protein [Amphimedon queenslandica];LOW QUALITY PROTEIN: glycerol-3-phosphate dehydrogenase [NAD(+)], cytoplasmic-like [Penaeus vannamei]	10.4709	11.7931	9.76257	8.42326	7.61084	8.69101	1.29531	0.373292	0.0276155	0.682863	up	no
MSTRG.10614	Em0006g934a	Em0006g934a.t1	GO:0001894(tissue homeostasis);GO:0002062(chondrocyte differentiation);GO:0005201(extracellular matrix structural constituent);GO:0005581(collagen trimer);GO:0048705(skeletal system morphogenesis)	04974(Protein digestion and absorption)	K19721	NA	collagen alpha-2(XI) chain isoform X4 [Ovis aries]	31.4446	38.8425	27.3763	41.028	47.3935	54.483	0.683417	-0.549161	0.0277578	0.683884	down	no
MSTRG.23888	Em0018g1125a	Em0018g1125a.t1	GO:0006506(GPI anchor biosynthetic process);GO:0016021(integral component of membrane);GO:0016758(transferase activity, transferring hexosyl groups)	00563(Glycosylphosphatidylinositol(GPI)-anchor biosynthesis)	K05284	EC:2.4.1.-	PREDICTED: GPI mannosyltransferase 1 [Salmo salar]	5.3309	6.46913	5.91412	7.49127	9.90331	9.08765	0.668907	-0.580123	0.0278066	0.683884	down	no
MSTRG.28976	Em0023g931a	Em0023g931a.t1	NA	NA	NA	NA	PREDICTED: uncharacterized protein LOC109590646 [Amphimedon queenslandica]	8.80099	10.94	7.18557	6.33592	6.14386	6.45962	1.42172	0.507641	0.0279948	0.686615	up	no
MSTRG.8414	Em0005g202a	Em0005g202a.t1	GO:0005634(nucleus)	NA	NA	NA	ubiquitin carboxyl-terminal hydrolase 4 isoform X1 [Monopterus albus]	1.66968	0.971257	0.892506	2.27893	1.5565	2.54835	0.553503	-0.853336	0.028045	0.686615	down	no
MSTRG.18454	Em0013g718a	Em0013g718a.t1	GO:0005871(kinesin complex);GO:0007018(microtubule-based movement);GO:0007059(chromosome segregation);GO:0008574(ATP-dependent microtubule motor activity, plus-end-directed);GO:0090307(mitotic spindle assembly)	NA	NA	NA	PREDICTED: kinesin-like protein KIF11-B [Amphimedon queenslandica]	7.49805	7.08858	8.2998	9.83785	11.6128	12.0159	0.68386	-0.548227	0.0281229	0.687658	down	no
MSTRG.11130	Em0007g214a	Em0007g214a.t1	GO:0003700(DNA binding transcription factor activity);GO:0005634(nucleus);GO:0005737(cytoplasm);GO:0045893(positive regulation of transcription, DNA-templated)	NA	NA	NA	PREDICTED: zinc finger protein GLI2-like [Amphimedon queenslandica]	8.30659	4.26516	5.42477	4.33778	4.18318	4.60039	1.37155	0.455802	0.0281571	0.687658	up	no
MSTRG.2562	Em0001g2513a;Em0001g2517a;Em0001g2512a	Em0001g2513a.t1;Em0001g2517a.t1;Em0001g2512a.t1	NA	NA	NA	NA		6.72151	2.73074	6.16626	4.1204	3.19391	2.42233	1.6041	0.681761	0.0282757	0.689704	up	no
MSTRG.19700	Em0014g929a	Em0014g929a.t1	GO:0002224(toll-like receptor signaling pathway);GO:0004842(ubiquitin-protein transferase activity);GO:0005164(tumor necrosis factor receptor binding);GO:0008063(Toll signaling pathway);GO:0008270(zinc ion binding);GO:0009898(cytoplasmic side of plasma membrane);GO:0016567(protein ubiquitination);GO:0019901(protein kinase binding);GO:0019903(protein phosphatase binding);GO:0030162(regulation of p…	04141(Protein processing in endoplasmic reticulum)	K03173	EC:2.3.2.27	PREDICTED: TNF receptor-associated factor 3-like [Amphimedon queenslandica]	3.51152	3.07496	3.52665	5.10998	5.82902	5.5859	0.611994	-0.708412	0.0284098	0.690708	down	no
MSTRG.26926	Em0021g821a	Em0021g821a.t1	GO:0003674(molecular_function);GO:0005737(cytoplasm);GO:0005764(lysosome);GO:0005765(lysosomal membrane);GO:0005768(endosome);GO:0005770(late endosome);GO:0005771(multivesicular body);GO:0005773(vacuole);GO:0005829(cytosol);GO:0005886(plasma membrane);GO:0008021(synaptic vesicle);GO:0008626(granzyme-mediated apoptotic signaling pathway);GO:0009897(external side of plasma membrane);GO:0009986(cell…	04145(Phagosome);04142(Lysosome);04140(Autophagy - animal)	K06528	NA	lysosome-associated membrane glycoprotein 1 [Boleophthalmus pectinirostris]	24.5571	24.8233	20.5755	15.6659	16.157	20.6023	1.33439	0.416184	0.0284386	0.690708	up	no
MSTRG.31613	Em0246g9a	Em0246g9a.t1	GO:0005887(integral component of plasma membrane);GO:0009992(cellular water homeostasis);GO:0015250(water channel activity);GO:0015254(glycerol channel activity);GO:0034220(ion transmembrane transport)	NA	NA	NA	PREDICTED: uncharacterized protein LOC105312704 [Amphimedon queenslandica]	9.42665	5.96941	7.45014	11.9169	11.0879	12.152	0.649837	-0.62185	0.0286277	0.693011	down	no
MSTRG.2300	Em0001g2806a;Em0001g2807a	Em0001g2806a.t1;Em0001g2807a.t1	GO:0003723(RNA binding);GO:0003964(RNA-directed DNA polymerase activity);GO:0005575(cellular_component);GO:0006278(RNA-dependent DNA biosynthetic process);GO:0006278(RNA-dependent DNA biosynthetic process)	02010(ABC transporters);02010(ABC transporters)	K05665	NA	PREDICTED: uncharacterized protein K02A2.6-like [Crassostrea gigas]	2.02462	1.38146	3.2687	1.97496	1.04684	1.24039	1.56605	0.647129	0.0286565	0.693011	up	no
MSTRG.13275	Em0008g887a	Em0008g887a.t1	GO:0016021(integral component of membrane)	NA	NA	NA	PREDICTED: uncharacterized protein LOC109476834 [Branchiostoma belcheri]	1.108	0.451984	0.768106	1.82267	1.34814	1.18437	0.534555	-0.903589	0.0288399	0.695048	down	no
MSTRG.11054	Em0007g21a	Em0007g21a.t1	GO:0000785(chromatin);GO:0003682(chromatin binding);GO:0006268(DNA unwinding involved in DNA replication);GO:0016887(ATPase activity);GO:0030174(regulation of DNA-dependent DNA replication initiation)	03030(DNA replication)	K02542	EC:3.6.4.12	PREDICTED: zygotic DNA replication licensing factor mcm6-B [Aplysia californica]	2.95658	2.7921	2.85566	4.46933	4.91884	4.34494	0.62654	-0.674522	0.0291909	0.700793	down	no
MSTRG.22278	Em0017g192a;Em0017g203a	Em0017g192a.t1;Em0017g203a.t1	NA	NA	NA	NA		5.32782	7.85847	4.3184	6.71943	9.58761	12.3967	0.609841	-0.713495	0.0293661	0.703562	down	no
MSTRG.1414	Em0001g1708a	Em0001g1708a.t1	NA	NA	NA	NA	PREDICTED: mucin-5AC-like [Amphimedon queenslandica]	3.15124	3.87244	3.75863	5.2178	5.05286	6.57408	0.6401	-0.64363	0.0294341	0.703562	down	no
MSTRG.9719	Em0005g1540a	Em0005g1540a.t1	GO:0004357(glutamate-cysteine ligase activity);GO:0006750(glutathione biosynthetic process);GO:0017109(glutamate-cysteine ligase complex)	00270(Cysteine and methionine metabolism);00480(Glutathione metabolism)	K11204	EC:6.3.2.2	PREDICTED: glutamate--cysteine ligase catalytic subunit-like [Amphimedon queenslandica]	23.3142	21.0653	20.681	15.9127	17.2085	18.6898	1.25573	0.328522	0.0296229	0.704857	up	no
MSTRG.4175	Em0002g1317a	Em0002g1317a.t1	NA	NA	NA	NA		3.19729	1.87673	2.57085	1.94358	1.2271	1.16074	1.76498	0.819653	0.029706	0.704857	up	no
MSTRG.26076	Em0020g1046a	Em0020g1046a.t1	GO:0000166(nucleotide binding);GO:0004672(protein kinase activity);GO:0004713(protein tyrosine kinase activity);GO:0004714(transmembrane receptor protein tyrosine kinase activity);GO:0005003(ephrin receptor activity);GO:0005524(ATP binding);GO:0005887(integral component of plasma membrane);GO:0006468(protein phosphorylation);GO:0007169(transmembrane receptor protein tyrosine kinase signaling path…	NA	NA	NA	PREDICTED: uncharacterized protein LOC100631392 [Amphimedon queenslandica]	10.5451	7.82847	7.09734	5.18698	6.88578	6.91009	1.34178	0.424151	0.0297628	0.704857	up	no
MSTRG.14466	Em0009g694a	Em0009g694a.t1	GO:0005829(cytosol);GO:0006412(translation);GO:0015935(small ribosomal subunit);GO:0042254(ribosome biogenesis)	03010(Ribosome)	K02964	NA	S18 [Suberites domuncula]	25.7739	18.5576	24.9607	30.4973	31.8409	37.6971	0.692678	-0.529743	0.0299373	0.704857	down	no
MSTRG.21649	Em0016g701a	Em0016g701a.t1	GO:0005622(intracellular);GO:0006623(protein targeting to vacuole);GO:0019898(extrinsic component of membrane);GO:0045053(protein retention in Golgi apparatus)	NA	NA	NA		15.2569	12.469	10.8758	12.9445	5.51019	8.18572	1.44898	0.535042	0.0300205	0.704857	up	no
MSTRG.6660	Em0003g1865a	Em0003g1865a.t1	NA	NA	NA	NA		60.3141	50.6393	41.8404	39.0268	31.1959	45.9076	1.31571	0.395842	0.0300516	0.704857	up	no
MSTRG.23997	Em0018g1188a;Em0018g1189a	Em0018g1188a.t1;Em0018g1189a.t1	GO:0003723(RNA binding);GO:0004004(ATP-dependent RNA helicase activity);GO:0004386(helicase activity);GO:0005524(ATP binding);GO:0005681(spliceosomal complex);GO:0005737(cytoplasm);GO:0006396(RNA processing);GO:0071013(catalytic step 2 spliceosome);GO:0003824(catalytic activity);GO:0005575(cellular_component);GO:0008152(metabolic process)	NA	NA	NA	PREDICTED: probable ATP-dependent RNA helicase DHX35 [Amphimedon queenslandica];PREDICTED: uncharacterized protein F13E9.13, mitochondrial-like [Gekko japonicus]	4.78763	5.68927	5.82778	16.842	7.13318	5.38098	0.55541	-0.848375	0.0300722	0.704857	down	no
MSTRG.4998	Em0003g192a	Em0003g192a.t1	NA	NA	NA	NA	PREDICTED: uncharacterized protein LOC100637704 [Amphimedon queenslandica]	1.29163	1.70877	2.06078	2.61541	2.55564	2.781	0.636463	-0.651853	0.0300792	0.704857	down	no
MSTRG.22982	Em0018g195a	Em0018g195a.t1	GO:0003674(molecular_function);GO:0005575(cellular_component);GO:0006855(drug transmembrane transport);GO:0008150(biological_process);GO:0015297(antiporter activity);GO:0016021(integral component of membrane)	NA	NA	NA	multidrug and toxin extrusion protein 2-like [Ictidomys tridecemlineatus]	2.77466	3.95183	2.75104	1.82185	1.35662	2.43518	1.6883	0.755571	0.0301495	0.704857	up	no
MSTRG.5141	Em0003g393a	Em0003g393a.t1	GO:0005887(integral component of plasma membrane);GO:0007166(cell surface receptor signaling pathway)	04142(Lysosome)	K06497	NA	PREDICTED: uncharacterized protein LOC100636331 [Amphimedon queenslandica]	25.5683	18.8445	23.7911	17.6149	13.9724	19.9188	1.32419	0.405112	0.0301914	0.704857	up	no
MSTRG.12360	Em0007g1334a	Em0007g1334a.t1	GO:0004536(deoxyribonuclease activity);GO:0006308(DNA catabolic process)	NA	NA	NA	Transposon Ty3-I Gag-Pol polyprotein [Trichinella sp. T6]	0.597059	0.751719	0.565448	0.493794	0.250955	0.294278	1.84233	0.881528	0.030233	0.704857	up	no
MSTRG.26790	Em0021g660a	Em0021g660a.t1	GO:0005524(ATP binding);GO:0007018(microtubule-based movement);GO:0008569(ATP-dependent microtubule motor activity, minus-end-directed);GO:0030286(dynein complex);GO:0031514(motile cilium);GO:0045503(dynein light chain binding);GO:0045505(dynein intermediate chain binding);GO:0051959(dynein light intermediate chain binding)	NA	NA	NA	PREDICTED: dynein heavy chain 2, axonemal-like [Amphimedon queenslandica]	3.66686	4.87058	4.80828	5.87004	6.71937	7.02318	0.680467	-0.555403	0.03028	0.704857	down	no
MSTRG.28408	Em0023g323a	Em0023g323a.t1	GO:0005622(intracellular);GO:0007034(vacuolar transport)	04144(Endocytosis)	K12192	NA	PREDICTED: charged multivesicular body protein 2b-like [Amphimedon queenslandica]	6.86711	6.81217	5.43723	4.92694	4.32151	4.37109	1.40361	0.489141	0.0303017	0.704857	up	no
MSTRG.16256	Em0011g498a	Em0011g498a.t1	GO:0005623(cell);GO:0005737(cytoplasm);GO:0009986(cell surface);GO:0030016(myofibril);GO:0030018(Z disc);GO:0030486(smooth muscle dense body);GO:0031430(M band);GO:0042383(sarcolemma);GO:0051259(protein complex oligomerization);GO:0097433(dense body);GO:0098723(skeletal muscle myofibril)	NA	NA	NA	PREDICTED: filamin-A-like [Amphimedon queenslandica]	10.2556	11.2685	10.4394	16.7994	15.4945	14.0095	0.690305	-0.534695	0.0303422	0.704857	down	no
MSTRG.16043	Em0011g299a	Em0011g299a.t1	GO:0003824(catalytic activity)	NA	NA	NA	PREDICTED: PP2C-like domain-containing protein CG9801 [Amphimedon queenslandica]	1.65569	2.94504	2.95977	1.50938	1.07852	1.73542	1.74877	0.806342	0.0304863	0.706498	up	no
MSTRG.22261	Em0017g180a	Em0017g180a.t1	GO:0000724(double-strand break repair via homologous recombination);GO:0003677(DNA binding);GO:0004518(nuclease activity);GO:0004519(endonuclease activity);GO:0004527(exonuclease activity);GO:0004528(phosphodiesterase I activity);GO:0005634(nucleus);GO:0006281(DNA repair);GO:0006974(cellular response to DNA damage stimulus);GO:0008409(5'-3' exonuclease activity);GO:0016787(hydrolase activity);GO:…	03460(Fanconi anemia pathway)	K15363	EC:3.1.21.-;EC:3.1.4.1	fanconi-associated nuclease 1 [Astyanax mexicanus]	11.6492	6.89484	8.22223	7.9291	5.30531	6.32178	1.36869	0.452793	0.0304999	0.706498	up	no
MSTRG.20797	Em0015g1118a	Em0015g1118a.t1	GO:0016300(tRNA (uracil) methyltransferase activity);GO:0030488(tRNA methylation);GO:0046872(metal ion binding)	NA	NA	NA	PREDICTED: probable tRNA (uracil-O(2)-)-methyltransferase isoform X2 [Amphimedon queenslandica]	3.35268	3.04096	2.60384	2.10558	1.89458	2.30226	1.42762	0.513615	0.0306897	0.710063	up	no
MSTRG.5485	Em0003g727a	Em0003g727a.t1	GO:0004536(deoxyribonuclease activity);GO:0006308(DNA catabolic process)	NA	NA	NA	Retrovirus-related Pol polyprotein from transposon 17.6 [Stylophora pistillata]	1.29894	1.10494	1.71482	0.788234	0.921725	0.832908	1.61971	0.695734	0.0308588	0.71291	up	no
MSTRG.6144	Em0002g188a	Em0002g188a.t1	NA	NA	NA	NA		5.69188	5.84846	4.17702	3.83106	3.17198	4.48822	1.36777	0.451822	0.0308897	0.71291	up	no
MSTRG.19759	Em0014g983a	Em0014g983a.t1	GO:0000151(ubiquitin ligase complex);GO:0000974(Prp19 complex);GO:0001664(G-protein coupled receptor binding);GO:0001786(phosphatidylserine binding);GO:0005524(ATP binding);GO:0005634(nucleus);GO:0005770(late endosome);GO:0005829(cytosol);GO:0005925(focal adhesion);GO:0016020(membrane);GO:0023026(MHC class II protein complex binding);GO:0031072(heat shock protein binding);GO:0031625(ubiquitin pro…	03040(Spliceosome);04141(Protein processing in endoplasmic reticulum);04010(MAPK signaling pathway);04144(Endocytosis);05164(Influenza A)	K03283	NA	PREDICTED: heat shock cognate 71 kDa protein isoform X3 [Buceros rhinoceros silvestris]	4.08445	1.66865	2.18965	2.06616	1.22183	1.22232	1.76102	0.816409	0.0312101	0.71835	up	no
MSTRG.15848	Em0011g22a	Em0011g22a.t1	NA	NA	NA	NA	PREDICTED: uncharacterized protein LOC109580856 [Amphimedon queenslandica]	35.7407	40.0054	44.747	44.7653	64.694	71.06	0.667481	-0.583201	0.0312408	0.71835	down	no
MSTRG.18157	Em0013g322a	Em0013g322a.t1	GO:0001938(positive regulation of endothelial cell proliferation);GO:0002042(cell migration involved in sprouting angiogenesis);GO:0003677(DNA binding);GO:0005634(nucleus);GO:0006351(transcription, DNA-templated);GO:0006355(regulation of transcription, DNA-templated);GO:0007274(neuromuscular synaptic transmission);GO:0007422(peripheral nervous system development);GO:0033089(positive regulation of…	04933(AGE-RAGE signaling pathway in diabetic complications)	K09203	NA	PREDICTED: early growth response protein 1-B-like [Amphimedon queenslandica]	9.34065	7.85011	10.8183	5.36397	6.05523	8.85165	1.38174	0.466485	0.0313211	0.71835	up	no
MSTRG.20	Em0001g57a	Em0001g57a.t1	GO:0004016(adenylate cyclase activity);GO:0004383(guanylate cyclase activity);GO:0004672(protein kinase activity);GO:0005524(ATP binding);GO:0005886(plasma membrane);GO:0006182(cGMP biosynthetic process);GO:0006468(protein phosphorylation);GO:0007165(signal transduction);GO:0008074(guanylate cyclase complex, soluble);GO:0016021(integral component of membrane);GO:0035556(intracellular signal trans…	00230(Purine metabolism);04744(Phototransduction)	K12322	EC:4.6.1.2	PREDICTED: speract receptor-like [Amphimedon queenslandica]	1.18139	1.40783	1.55737	0.569711	0.892903	0.728968	1.89205	0.919953	0.0315732	0.722896	up	no
MSTRG.29025	Em0023g963a	Em0023g963a.t1	GO:0004536(deoxyribonuclease activity);GO:0006308(DNA catabolic process)	NA	NA	NA	Transposon Ty3-I Gag-Pol polyprotein [Trichinella britovi]	24879.6	22270.4	15983.9	16493.9	5003.28	18782.1	1.56741	0.648378	0.0316555	0.723942	up	no
MSTRG.29709	Em0028g31a	Em0028g31a.t1	GO:0001726(ruffle);GO:0003779(actin binding);GO:0005200(structural constituent of cytoskeleton);GO:0005856(cytoskeleton);GO:0005925(focal adhesion);GO:0007016(cytoskeletal anchoring at plasma membrane);GO:0007155(cell adhesion);GO:0016020(membrane);GO:0016021(integral component of membrane);GO:0051015(actin filament binding)	NA	NA	NA	PREDICTED: talin-1 [Amphimedon queenslandica]	3.37068	2.46786	4.27643	2.67692	2.2565	1.95513	1.46837	0.554219	0.0318659	0.724933	up	no
MSTRG.13218	Em0008g719a	Em0008g719a.t1	GO:0002224(toll-like receptor signaling pathway);GO:0004842(ubiquitin-protein transferase activity);GO:0005164(tumor necrosis factor receptor binding);GO:0008063(Toll signaling pathway);GO:0008270(zinc ion binding);GO:0009898(cytoplasmic side of plasma membrane);GO:0016567(protein ubiquitination);GO:0019901(protein kinase binding);GO:0019903(protein phosphatase binding);GO:0030162(regulation of p…	04620(Toll-like receptor signaling pathway);04621(NOD-like receptor signaling pathway);04622(RIG-I-like receptor signaling pathway);05168(Herpes simplex infection)	K03174	NA	PREDICTED: TNF receptor-associated factor 3-like [Amphimedon queenslandica]	1.466	1.46164	2.16816	0.820038	0.92824	0.903809	1.92143	0.94218	0.031898	0.724933	up	no
MSTRG.21897	Em0016g991a	Em0016g991a.t1	GO:0016020(membrane);GO:0016021(integral component of membrane)	NA	NA	NA	PREDICTED: transmembrane and TPR repeat-containing protein 1-like [Amphimedon queenslandica]	1.32883	1.11697	0.989615	2.09368	2.19339	1.88682	0.556443	-0.845693	0.0319163	0.724933	down	no
Em0023g203a	Em0023g203a	Em0023g203a.t1	GO:0004536(deoxyribonuclease activity);GO:0006308(DNA catabolic process)	04621(NOD-like receptor signaling pathway)	K04612	NA	Transposon Ty3-I Gag-Pol polyprotein [Trichinella sp. T6]	0.68028	0.572772	0.815128	0.395105	0.343453	0.496691	1.6743	0.74356	0.0319188	0.724933	up	no
MSTRG.14672	Em0009g956a	Em0009g956a.t1	GO:0005201(extracellular matrix structural constituent);GO:0005886(plasma membrane);GO:0007160(cell-matrix adhesion);GO:0007605(sensory perception of sound);GO:0031225(anchored component of membrane)	NA	NA	NA	sushi, nidogen and EGF-like domain-containing protein 1 [Pseudonaja textilis]	3.68596	3.86618	2.31494	1.26476	1.52836	3.27859	1.62509	0.700522	0.03205	0.725416	up	no
MSTRG.15974	Em0011g122a	Em0011g122a.t1	GO:0005737(cytoplasm);GO:0005764(lysosome);GO:0006629(lipid metabolic process);GO:0008134(transcription factor binding);GO:0016787(hydrolase activity);GO:0016810(hydrolase activity, acting on carbon-nitrogen (but not peptide) bonds)	NA	NA	NA	PREDICTED: N-acylethanolamine-hydrolyzing acid amidase-like [Branchiostoma belcheri]	25.0073	21.2709	23.4355	18.532	17.2005	20.1508	1.24749	0.319028	0.0321733	0.726379	up	no
MSTRG.8935	Em0005g842a	Em0005g842a.t1	NA	NA	NA	NA	PREDICTED: uncharacterized protein LOC105314946 isoform X1 [Amphimedon queenslandica]	15.4157	10.6421	10.8719	9.91638	9.12933	7.97934	1.3665	0.450482	0.032462	0.727252	up	no
MSTRG.23729	Em0018g987a	Em0018g987a.t1	NA	NA	NA	NA		41.3066	32.1815	31.7388	24.4213	27.0911	29.6153	1.29705	0.375236	0.0325093	0.727487	up	no
MSTRG.17714	Em0012g918a	Em0012g918a.t1	NA	NA	NA	NA	PREDICTED: uncharacterized protein LOC105314862, partial [Amphimedon queenslandica]	17.4834	15.965	11.6211	11.7391	10.1925	11.6262	1.34304	0.425504	0.032778	0.729585	up	no
MSTRG.29973	Em0034g21a	Em0034g21a.t1	NA	NA	NA	NA		1.52675	1.07372	1.3337	0.707771	0.593926	0.84988	1.8285	0.870662	0.0327875	0.729585	up	no
MSTRG.28089	Em0023g164a	Em0023g164a.t1	GO:0006629(lipid metabolic process);GO:0070328(triglyceride homeostasis);GO:1902884(positive regulation of response to oxidative stress)	00564(Glycerophospholipid metabolism);00565(Ether lipid metabolism);00590(Arachidonic acid metabolism);00591(Linoleic acid metabolism);00592(alpha-Linolenic acid metabolism)	K16343	EC:3.1.1.4	PREDICTED: 85/88 kDa calcium-independent phospholipase A2-like isoform X1 [Amphimedon queenslandica]	4.89588	4.57747	6.58399	4.1782	3.54627	3.69951	1.40558	0.491168	0.0331864	0.73441	up	no
MSTRG.14831	Em0009g1237a	Em0009g1237a.t1	GO:0007165(signal transduction);GO:0042981(regulation of apoptotic process)	04140(Autophagy - animal)	K08803	EC:2.7.11.1	PREDICTED: death-associated protein kinase 1-like [Amphimedon queenslandica]	5.14468	5.40633	3.67031	6.41598	6.81334	8.00243	0.669814	-0.578168	0.033232	0.73441	down	no
MSTRG.11934	Em0006g1467a	Em0006g1467a.t1	NA	NA	NA	NA		2.02676	1.48776	1.79514	5.1916	2.67944	2.65453	0.504453	-0.987209	0.0332539	0.73441	down	no
MSTRG.4504	Em0002g1579a;Em0002g1577a	Em0002g1579a.t1;Em0002g1577a.t1	GO:0001525(angiogenesis);GO:0001702(gastrulation with mouth forming second);GO:0003924(GTPase activity);GO:0005515(protein binding);GO:0005525(GTP binding);GO:0005768(endosome);GO:0005769(early endosome);GO:0005886(plasma membrane);GO:0030100(regulation of endocytosis);GO:0030139(endocytic vesicle);GO:0098609(cell-cell adhesion)	04144(Endocytosis);04145(Phagosome)	K07889	NA	ras-related protein Rab-5C [Lingula anatina]	2.31908	1.53337	2.24743	1.54914	1.00137	1.56781	1.48116	0.566725	0.0335139	0.737455	up	no
Em0001g414a	Em0001g414a	Em0001g414a.t1	GO:0017000(antibiotic biosynthetic process)	00061(Fatty acid biosynthesis)	K00665	EC:2.3.1.85	Erythronolide synthase, modules 3 and 4 [Folsomia candida]	0.632068	0.592397	0.687705	1.00688	0.899004	1.05986	0.644752	-0.633184	0.0336749	0.739537	down	no
MSTRG.8838	Em0005g678a	Em0005g678a.t1	NA	NA	NA	NA		22.6083	28.6632	18.378	23.4397	28.7995	67.7624	0.580405	-0.784868	0.0337947	0.740339	down	no
MSTRG.14546	Em0009g1011a;Em0009g1013a;Em0009g1016a;Em0009g1010a;Em0009g1015a	Em0009g1011a.t1;Em0009g1013a.t1;Em0009g1016a.t1;Em0009g1010a.t1;Em0009g1015a.t1	GO:0004438(phosphatidylinositol-3-phosphatase activity);GO:0004725(protein tyrosine phosphatase activity);GO:0035335(peptidyl-tyrosine dephosphorylation);GO:0046856(phosphatidylinositol dephosphorylation);GO:0052629(phosphatidylinositol-3,5-bisphosphate 3-phosphatase activity);GO:0005575(cellular_component);GO:0016311(dephosphorylation);GO:0016791(phosphatase activity);GO:0052629(phosphatidylinos…	NA	NA	NA	PREDICTED: myotubularin-related protein 12-like [Amphimedon queenslandica];PREDICTED: LOW QUALITY PROTEIN: uncharacterized protein LOC100635930 [Amphimedon queenslandica];PREDICTED: myotubularin-related protein 10-B-like [Amphimedon queenslandica];PREDICTED: uncharacterized protein LOC101862225 [Aplysia californica]	6.38357	6.45289	5.99532	5.3322	5.00812	4.5898	1.26133	0.334943	0.0341939	0.746927	up	no
MSTRG.10329	Em0006g618a	Em0006g618a.t1	GO:0000794(condensed nuclear chromosome);GO:0001520(outer dense fiber);GO:0003674(molecular_function);GO:0005694(chromosome);GO:0005737(cytoplasm);GO:0007286(spermatid development);GO:0031514(motile cilium);GO:0035082(axoneme assembly);GO:0036126(sperm flagellum);GO:0042995(cell projection);GO:0051321(meiotic cell cycle);GO:0072687(meiotic spindle)	NA	NA	NA	PREDICTED: radial spoke head 1 homolog isoform X2 [Amphimedon queenslandica]	19.6153	17.8035	15.4567	14.405	14.1213	12.7343	1.2815	0.357839	0.0342352	0.746927	up	no
MSTRG.32327	Em0599g2a	Em0599g2a.t1	GO:0016020(membrane);GO:0016021(integral component of membrane);GO:0055114(oxidation-reduction process)	NA	NA	NA	putative ferric-chelate reductase 1 [Danio rerio]	9.06162	8.92059	7.14317	5.95522	7.04303	6.21984	1.30738	0.38668	0.0342464	0.746927	up	no
MSTRG.23720	Em0018g967a	Em0018g967a.t1	GO:0000054(ribosomal subunit export from nucleus);GO:0000460(maturation of 5.8S rRNA);GO:0000470(maturation of LSU-rRNA);GO:0003743(translation initiation factor activity);GO:0005634(nucleus);GO:0005638(lamin filament);GO:0005654(nucleoplasm);GO:0005730(nucleolus);GO:0005737(cytoplasm);GO:0005829(cytosol);GO:0005882(intermediate filament);GO:0006110(regulation of glycolytic process);GO:0006412(tr…	03008(Ribosome biogenesis in eukaryotes)	K03264	NA	eukaryotic translation initiation factor 6 [Mizuhopecten yessoensis]	6.77038	4.87747	8.16237	5.0398	4.18001	5.16324	1.37733	0.461874	0.034388	0.747854	up	no
MSTRG.23800	Em0018g1021a;Em0018g1022a	Em0018g1021a.t1;Em0018g1022a.t1	GO:0000780(condensed nuclear chromosome, centromeric region);GO:0005876(spindle microtubule);GO:0007052(mitotic spindle organization);GO:0031616(spindle pole centrosome);GO:0032133(chromosome passenger complex);GO:0032465(regulation of cytokinesis);GO:0035174(histone serine kinase activity);GO:0051233(spindle midzone)	NA	NA	NA	hypothetical protein BRAFLDRAFT_61299 [Branchiostoma floridae]	2.09535	3.28119	6.09501	2.90002	2.00015	1.24555	1.86659	0.900407	0.0345572	0.750395	up	no
MSTRG.18160	Em0013g325a	Em0013g325a.t1	GO:0001938(positive regulation of endothelial cell proliferation);GO:0002042(cell migration involved in sprouting angiogenesis);GO:0003677(DNA binding);GO:0005634(nucleus);GO:0006351(transcription, DNA-templated);GO:0006355(regulation of transcription, DNA-templated);GO:0007274(neuromuscular synaptic transmission);GO:0007422(peripheral nervous system development);GO:0033089(positive regulation of…	04933(AGE-RAGE signaling pathway in diabetic complications)	K09203	NA	PREDICTED: early growth response protein 1-B-like [Amphimedon queenslandica]	9.33172	7.85464	11.2654	5.72007	6.16272	8.94493	1.36605	0.450011	0.034732	0.753365	up	no
MSTRG.32425	Em0674g2a	Em0674g2a.t1	GO:0004768(stearoyl-CoA 9-desaturase activity);GO:0005506(iron ion binding);GO:0005789(endoplasmic reticulum membrane);GO:0006636(unsaturated fatty acid biosynthetic process);GO:0016021(integral component of membrane);GO:0016491(oxidoreductase activity)	01040(Biosynthesis of unsaturated fatty acids)	K00507	EC:1.14.19.1	PREDICTED: acyl-CoA desaturase-like [Amphimedon queenslandica]	4.87247	5.67967	4.39506	3.43145	3.27536	3.34313	1.48729	0.572688	0.0348054	0.754129	up	no
MSTRG.16067	Em0011g264a;Em0011g279a	Em0011g264a.t1;Em0011g279a.t1	GO:0005887(integral component of plasma membrane);GO:0008519(ammonium transmembrane transporter activity);GO:0015695(organic cation transport);GO:0019740(nitrogen utilization);GO:0072488(ammonium transmembrane transport);GO:0072488(ammonium transmembrane transport)	NA	NA	NA	PREDICTED: ammonium transporter Rh type A-like [Amphimedon queenslandica]	13.9249	11.3459	13.8348	9.31813	10.1772	11.5224	1.26075	0.334287	0.0350654	0.7567	up	no
MSTRG.7317	Em0004g633a;Em0004g634a	Em0004g633a.t1;Em0004g634a.t1	GO:0016853(isomerase activity);GO:0016866(intramolecular transferase activity);GO:0016866(intramolecular transferase activity)	00100(Steroid biosynthesis);00100(Steroid biosynthesis)	K01852	EC:5.4.99.7	PREDICTED: lanosterol synthase [Amphimedon queenslandica];PREDICTED: lanosterol synthase-like [Branchiostoma belcheri]	3.95101	4.89379	4.08601	2.76671	3.05676	3.8854	1.33186	0.413439	0.0351755	0.757404	up	no
MSTRG.19986	Em0015g62a	Em0015g62a.t1	GO:0004609(phosphatidylserine decarboxylase activity);GO:0005634(nucleus);GO:0008654(phospholipid biosynthetic process)	00564(Glycerophospholipid metabolism)	K01613	EC:4.1.1.65	PREDICTED: phosphatidylserine decarboxylase proenzyme, mitochondrial-like [Amphimedon queenslandica]	13.6082	14.7939	15.481	12.1393	11.2631	9.22742	1.34488	0.427478	0.0352572	0.757404	up	no
MSTRG.17989	Em0013g159a	Em0013g159a.t1	GO:0000164(protein phosphatase type 1 complex);GO:0005977(glycogen metabolic process);GO:0005981(regulation of glycogen catabolic process);GO:0019888(protein phosphatase regulator activity);GO:0050790(regulation of catalytic activity)	NA	NA	NA	PREDICTED: protein phosphatase 1 regulatory subunit 3C-like [Amphimedon queenslandica]	12.144	9.96414	8.72286	8.05156	7.7756	6.20761	1.3992	0.4846	0.0352884	0.757404	up	no
MSTRG.29079	Em0024g118a	Em0024g118a.t1	GO:0000166(nucleotide binding);GO:0004672(protein kinase activity);GO:0004713(protein tyrosine kinase activity);GO:0004714(transmembrane receptor protein tyrosine kinase activity);GO:0005524(ATP binding);GO:0005737(cytoplasm);GO:0006468(protein phosphorylation);GO:0016020(membrane);GO:0016021(integral component of membrane);GO:0016301(kinase activity);GO:0016310(phosphorylation);GO:0016740(transf…	NA	NA	NA	PREDICTED: probable serine/threonine-protein kinase drkD [Amphimedon queenslandica]	1.30619	1.46335	1.16952	0.834104	0.73817	0.872777	1.61103	0.687987	0.0353717	0.757725	up	no
MSTRG.30802	Em0093g11a;Em0093g7a;Em0093g9a	Em0093g11a.t1;Em0093g7a.t1;Em0093g9a.t1	NA	NA	NA	NA		1.79429	1.85973	2.22956	3.2226	2.56245	3.01668	0.668457	-0.581094	0.0355578	0.759615	down	no
MSTRG.2032	Em0001g2151a	Em0001g2151a.t1	NA	NA	NA	NA	PREDICTED: uncharacterized protein LOC109582765 [Amphimedon queenslandica]	1.61725	1.17522	1.44035	2.26145	2.1708	2.98686	0.57053	-0.809625	0.0357046	0.761108	down	no
MSTRG.31680	Em0273g4a	Em0273g4a.t1	GO:0004252(serine-type endopeptidase activity);GO:0005044(scavenger receptor activity);GO:0006508(proteolysis);GO:0006898(receptor-mediated endocytosis);GO:0016020(membrane)	NA	NA	NA	PREDICTED: LOW QUALITY PROTEIN: deleted in malignant brain tumors 1 protein [Strongylocentrotus purpuratus]	5.63059	5.42516	4.51976	7.26324	6.59999	7.83533	0.717813	-0.47832	0.036026	0.765486	down	no
MSTRG.27163	Em0022g23a	Em0022g23a.t1	GO:0004322(ferroxidase activity);GO:0005381(iron ion transmembrane transporter activity);GO:0005507(copper ion binding);GO:0006826(iron ion transport);GO:0033215(iron assimilation by reduction and transport);GO:0033573(high-affinity iron permease complex)	00053(Ascorbate and aldarate metabolism)	K00423	EC:1.10.3.3	laccase-4-like [Orbicella faveolata]	1.85083	2.17135	1.39581	0.916578	1.18314	1.3529	1.56924	0.650065	0.0365075	0.773224	up	no
MSTRG.440	Em0001g588a	Em0001g588a.t1	NA	04310(Wnt signaling pathway);04330(Notch signaling pathway);04350(TGF-beta signaling pathway);04068(FoxO signaling pathway)	K04498	EC:2.3.1.48	PREDICTED: uncharacterized protein LOC109583010 [Amphimedon queenslandica]	0.543032	0.443071	0.474923	0.872251	1.17949	0.780516	0.515852	-0.95497	0.036699	0.776448	down	no
MSTRG.19292	Em0014g689a	Em0014g689a.t1	NA	NA	NA	NA	PREDICTED: uncharacterized protein LOC109581267 [Amphimedon queenslandica]	4.60017	3.37561	5.98469	3.39606	2.96929	2.96285	1.49659	0.581677	0.03682	0.7775	up	no
MSTRG.14694	Em0009g1083a	Em0009g1083a.t1	GO:0005887(integral component of plasma membrane);GO:0007268(chemical synaptic transmission);GO:0008188(neuropeptide receptor activity);GO:0032870(cellular response to hormone stimulus);GO:0042277(peptide binding);GO:1901652(response to peptide)	NA	NA	NA	PREDICTED: uncharacterized protein LOC109582323 isoform X1 [Amphimedon queenslandica]	1.39105	1.1124	0.944915	0.78175	0.428044	0.916868	1.62149	0.697322	0.0369554	0.778542	up	no
MSTRG.7671	Em0004g1044a	Em0004g1044a.t1	NA	NA	NA	NA		5.49827	10.1681	11.1478	16.1517	14.8066	14.0165	0.596204	-0.746121	0.0370248	0.779176	down	no
MSTRG.29959	Em0033g25a	Em0033g25a.t1	NA	NA	NA	NA	PREDICTED: uncharacterized protein LOC105393267 [Plutella xylostella]	0.328745	0.365475	0.310761	0.230365	0.147508	0.152124	1.8962	0.923112	0.0371689	0.781376	up	no
MSTRG.5049	Em0003g220a	Em0003g220a.t1	GO:0005525(GTP binding)	NA	NA	NA	PREDICTED: uncharacterized protein LOC105315658 [Amphimedon queenslandica]	1.68251	0.999677	0.868274	2.23988	1.90022	2.49095	0.53543	-0.901229	0.0372513	0.781644	down	no
MSTRG.21567	Em0016g594a	Em0016g594a.t1	GO:0005254(chloride channel activity);GO:0005515(protein binding);GO:0005783(endoplasmic reticulum);GO:0005886(plasma membrane);GO:0005887(integral component of plasma membrane);GO:0006811(ion transport);GO:0006820(anion transport);GO:0006821(chloride transport);GO:0008271(secondary active sulfate transmembrane transporter activity);GO:0008272(sulfate transport);GO:0008509(anion transmembrane tra…	NA	NA	NA	PREDICTED: solute carrier family 26 member 6-like [Amphimedon queenslandica]	3.64324	3.6506	2.85105	5.3663	4.52088	5.41449	0.662993	-0.592935	0.0375427	0.785893	down	no
MSTRG.23536	Em0018g765a;Em0018g766a	Em0018g765a.t1;Em0018g766a.t1	GO:0005576(extracellular region);GO:0008233(peptidase activity);GO:0019835(cytolysis);GO:0006508(proteolysis);GO:0009986(cell surface);GO:0010952(positive regulation of peptidase activity);GO:0016504(peptidase activator activity);GO:0070062(extracellular exosome)	NA	NA	NA	fibroleukin [Terrapene mexicana triunguis];ryncolin-1-like [Exaiptasia pallida]	15.6871	10.8598	13.9997	19.413	19.338	18.6854	0.70594	-0.502382	0.0376375	0.787046	down	no
MSTRG.9908	Em0006g471a	Em0006g471a.t1	GO:0005375(copper ion transmembrane transporter activity);GO:0016021(integral component of membrane);GO:0035434(copper ion transmembrane transport)	NA	NA	NA	PREDICTED: probable low affinity copper uptake protein 2 [Amphimedon queenslandica]	12.6387	14.9259	12.4654	16.4232	19.7461	22.5802	0.681368	-0.553495	0.0377456	0.788472	down	no
MSTRG.29749	Em0028g9a	Em0028g9a.t1	NA	NA	NA	NA	PREDICTED: uncharacterized protein LOC100638002 [Amphimedon queenslandica]	5.53141	7.35198	5.14931	3.73079	4.26638	5.35457	1.35059	0.433589	0.0378591	0.789538	up	no
MSTRG.14122	Em0009g599a	Em0009g599a.t1	GO:0016740(transferase activity)	00590(Arachidonic acid metabolism);00480(Glutathione metabolism);00980(Metabolism of xenobiotics by cytochrome P450);00982(Drug metabolism - cytochrome P450)	K04097	EC:5.3.99.2;EC:2.5.1.18	PREDICTED: hematopoietic prostaglandin D synthase-like [Branchiostoma belcheri]	17.1551	15.9457	13.3901	10.0779	11.7552	12.5968	1.3503	0.433284	0.0378765	0.789538	up	no
MSTRG.3352	Em0002g76a	Em0002g76a.t1	NA	NA	NA	NA		1.34297	0.790854	0.869114	1.91349	1.7767	2.03838	0.524204	-0.931798	0.0379627	0.790502	down	no
MSTRG.31890	Em0382g2a	Em0382g2a.t1	GO:0070492(oligosaccharide binding)	NA	NA	NA	PREDICTED: mucin-like protein [Amphimedon queenslandica]	13.6377	14.8138	12.7156	22.17	17.8409	18.0663	0.708834	-0.49648	0.0381047	0.792097	down	no
MSTRG.20658	Em0015g1015a	Em0015g1015a.t1	GO:0003690(double-stranded DNA binding);GO:0046403(polynucleotide 3'-phosphatase activity);GO:0046404(ATP-dependent polydeoxyribonucleotide 5'-hydroxyl-kinase activity);GO:0098504(DNA 3' dephosphorylation involved in DNA repair);GO:0098506(polynucleotide 3' dephosphorylation)	NA	NA	NA	PREDICTED: uncharacterized protein LOC100641772 [Amphimedon queenslandica]	15.3498	14.2857	18.4582	12.8815	9.76078	12.6385	1.36317	0.446964	0.0381487	0.792097	up	no
MSTRG.26273	Em0021g135a	Em0021g135a.t1	GO:0005768(endosome);GO:0005886(plasma membrane);GO:0006904(vesicle docking involved in exocytosis);GO:0008021(synaptic vesicle);GO:0009306(protein secretion);GO:0030140(trans-Golgi network transport vesicle);GO:0032869(cellular response to insulin stimulus);GO:0048210(Golgi vesicle fusion to target membrane);GO:0072659(protein localization to plasma membrane)	04144(Endocytosis)	K07901	NA	ras-related protein Rab-8A-like protein [Dinothrombium tinctorium]	7.22688	7.27145	7.45349	5.604	4.35363	5.68985	1.4029	0.48841	0.0382497	0.792097	up	no
MSTRG.18885	Em0013g1117a	Em0013g1117a.t1	NA	NA	NA	NA	PREDICTED: uncharacterized protein LOC109581413 [Amphimedon queenslandica]	2.49438	1.81187	1.51866	3.20417	2.71157	3.24567	0.63581	-0.653333	0.0382978	0.792097	down	no
MSTRG.12596	Em0008g104a	Em0008g104a.t1	GO:0005524(ATP binding);GO:0005575(cellular_component);GO:0006139(nucleobase-containing compound metabolic process);GO:0016301(kinase activity);GO:0016310(phosphorylation);GO:0016740(transferase activity);GO:0019206(nucleoside kinase activity)	00240(Pyrimidine metabolism);00983(Drug metabolism - other enzymes)	K00857	EC:2.7.1.21	hypothetical protein TRIADDRAFT_53594 [Trichoplax adhaerens]	3.53756	4.383	4.29559	5.08013	7.60326	7.97343	0.591385	-0.757829	0.0385032	0.792097	down	no
MSTRG.28379	Em0023g418a	Em0023g418a.t1	GO:0004784(superoxide dismutase activity);GO:0005507(copper ion binding);GO:0005737(cytoplasm);GO:0008270(zinc ion binding);GO:0019430(removal of superoxide radicals)	04146(Peroxisome)	K04565	EC:1.15.1.1	uncharacterized protein LOC100200684 [Hydra vulgaris]	25.3462	22.8331	21.1007	19.1902	15.5532	19.6054	1.27473	0.350193	0.0385431	0.792097	up	no
MSTRG.8114	Em0004g1573a	Em0004g1573a.t1	GO:0005634(nucleus);GO:0007033(vacuole organization);GO:0008568(microtubule-severing ATPase activity);GO:0031122(cytoplasmic microtubule organization)	04144(Endocytosis);04217(Necroptosis)	K12196	NA	PREDICTED: vacuolar protein sorting-associated protein 4B [Dipodomys ordii]	4.68279	3.37135	4.24189	2.71192	3.04373	3.47755	1.33172	0.413289	0.038631	0.792097	up	no
MSTRG.18994	Em0014g129a;Em0014g125a	Em0014g129a.t1;Em0014g125a.t1	NA	NA	NA	NA	coiled-coil domain-containing protein 57-like [Exaiptasia pallida];PREDICTED: coiled-coil domain-containing protein 57 [Latimeria chalumnae]	0.81665	0.968306	0.743915	1.32676	1.31518	1.45949	0.616582	-0.697636	0.0386365	0.792097	down	no
MSTRG.26969	Em0021g838a;Em0021g840a	Em0021g838a.t1;Em0021g840a.t1	NA	NA	NA	NA	PREDICTED: cyclic AMP receptor-like protein A [Amphimedon queenslandica]	3.0451	3.13214	1.48586	1.23323	1.50702	1.68929	1.73	0.790771	0.0387045	0.792097	up	no
MSTRG.21350	Em0016g352a	Em0016g352a.t1	NA	NA	NA	NA	PREDICTED: uncharacterized protein LOC102807808 [Saccoglossus kowalevskii]	1.98472	2.00032	1.00025	0.905946	0.628834	1.37679	1.71224	0.775881	0.0387302	0.792097	up	no
MSTRG.11212	Em0007g165a	Em0007g165a.t1	GO:0005811(lipid droplet);GO:0035267(NuA4 histone acetyltransferase complex)	NA	NA	NA	PREDICTED: late histone H2B.L4-like [Amphimedon queenslandica]	9.95684	18.5135	19.8844	20.4821	28.4481	34.5724	0.579081	-0.788163	0.038744	0.792097	down	no
MSTRG.6430	Em0003g1546a	Em0003g1546a.t1	GO:0005575(cellular_component);GO:0008152(metabolic process);GO:0016491(oxidoreductase activity)	00350(Tyrosine metabolism)	K00505	EC:1.14.18.1	Tyrosinase [Exaiptasia pallida]	7.16987	12.0768	9.35119	12.253	15.5007	15.7604	0.657207	-0.60558	0.0387448	0.792097	down	no
MSTRG.21954	Em0016g1034a	Em0016g1034a.t1	GO:0005201(extracellular matrix structural constituent)	04933(AGE-RAGE signaling pathway in diabetic complications)	K19720	NA	PREDICTED: collagen alpha-1(I) chain-like [Amphimedon queenslandica]	16.0714	30.285	25.6342	26.5935	42.5452	46.1136	0.624635	-0.678915	0.0388395	0.792097	down	no
MSTRG.6415	Em0003g1534a	Em0003g1534a.t1	NA	NA	NA	NA	PREDICTED: uncharacterized protein LOC105314935 [Amphimedon queenslandica]	2.72892	1.94837	1.95643	1.92853	1.32399	1.30587	1.45528	0.541292	0.0393074	0.797449	up	no
MSTRG.21709	Em0016g782a;Em0016g786a	Em0016g782a.t1;Em0016g786a.t1	GO:0003674(molecular_function);GO:0003674(molecular_function)	NA	NA	NA	hypothetical protein HELRODRAFT_193870 [Helobdella robusta];ubiquitin-60S ribosomal protein L40-like [Seriola lalandi dorsalis]	13.0608	15.1612	15.9205	12.885	11.3014	9.78079	1.29956	0.37802	0.0394028	0.797449	up	no
MSTRG.23451	Em0018g700a	Em0018g700a.t1	GO:0000045(autophagosome assembly);GO:0005776(autophagosome);GO:0010008(endosome membrane)	04144(Endocytosis)	K07891	NA	Rab-like4, partial [Suberites domuncula]	5.06075	5.66794	5.61224	4.05848	3.70984	2.68737	1.56287	0.644201	0.0394567	0.797449	up	no
MSTRG.4795	Em0003g34a;Em0003g37a	Em0003g34a.t1;Em0003g37a.t1	GO:0006287(base-excision repair, gap-filling);GO:0006297(nucleotide-excision repair, DNA gap filling);GO:0008296(3'-5'-exodeoxyribonuclease activity);GO:0043625(delta DNA polymerase complex);GO:0045004(DNA replication proofreading);GO:0045004(DNA replication proofreading)	00230(Purine metabolism);00240(Pyrimidine metabolism);03030(DNA replication);03410(Base excision repair);03420(Nucleotide excision repair);03430(Mismatch repair);03440(Homologous recombination);03440(Homologous recombination)	K02327	EC:2.7.7.7	predicted protein [Nematostella vectensis];DNA polymerase delta catalytic subunit [Mizuhopecten yessoensis]	1.71449	2.05085	2.06175	3.01562	2.78676	3.1177	0.653256	-0.61428	0.0395851	0.797994	down	no
MSTRG.3499	Em0002g511a	Em0002g511a.t1	GO:0000166(nucleotide binding);GO:0004672(protein kinase activity);GO:0004713(protein tyrosine kinase activity);GO:0004714(transmembrane receptor protein tyrosine kinase activity);GO:0005003(ephrin receptor activity);GO:0005004(GPI-linked ephrin receptor activity);GO:0005524(ATP binding);GO:0005769(early endosome);GO:0005886(plasma membrane);GO:0005887(integral component of plasma membrane);GO:00…	NA	NA	NA	PREDICTED: uncharacterized protein LOC100641922 [Amphimedon queenslandica]	4.02395	4.6738	2.33605	5.59995	5.40755	6.08937	0.645369	-0.631803	0.039667	0.797994	down	no
MSTRG.6503	Em0003g1719a	Em0003g1719a.t1	NA	NA	NA	NA		5.60129	4.0393	3.48464	7.78147	7.43431	6.26091	0.611138	-0.710429	0.0396917	0.797994	down	no
MSTRG.23845	Em0018g1119a	Em0018g1119a.t1	GO:0016491(oxidoreductase activity);GO:0055114(oxidation-reduction process)	NA	NA	NA	PREDICTED: oxidative stress-induced growth inhibitor 1 [Pseudopodoces humilis]	7.3452	6.46888	7.42763	5.7856	5.41466	5.3013	1.28725	0.364298	0.039694	0.797994	up	no
MSTRG.15985	Em0011g216a	Em0011g216a.t1	GO:0005634(nucleus);GO:0005737(cytoplasm);GO:0010165(response to X-ray)	NA	NA	NA	PREDICTED: X-ray radiation resistance-associated protein 1-like isoform X1 [Amphimedon queenslandica]	2.03035	2.8012	3.48033	3.74922	4.99259	5.05273	0.602548	-0.730851	0.0398633	0.799772	down	no
MSTRG.24125	Em0019g170a	Em0019g170a.t1	NA	NA	NA	NA	PREDICTED: uncharacterized protein LOC109582781 [Amphimedon queenslandica]	2.66183	1.80207	1.22489	3.12571	2.8964	3.51912	0.596232	-0.746054	0.040122	0.803334	down	no
MSTRG.26409	Em0021g264a	Em0021g264a.t1	GO:0000166(nucleotide binding);GO:0003924(GTPase activity);GO:0005525(GTP binding);GO:0005575(cellular_component);GO:0005737(cytoplasm);GO:0007165(signal transduction);GO:0008150(biological_process);GO:0016020(membrane)	NA	NA	NA	PREDICTED: NF-kappa-B inhibitor-interacting Ras-like protein 2 isoform X1 [Amphimedon queenslandica]	2.69869	2.54921	3.57225	5.42655	5.14242	4.05404	0.603169	-0.729365	0.0403082	0.806245	down	no
MSTRG.13333	Em0008g915a	Em0008g915a.t1	NA	NA	NA	NA		6.52501	4.61098	8.36944	5.01897	3.88857	3.85518	1.52831	0.61194	0.0404553	0.808063	up	no
MSTRG.21106	Em0016g130a	Em0016g130a.t1	GO:0005509(calcium ion binding)	NA	NA	NA	PREDICTED: spectrin alpha chain, non-erythrocytic 1-like [Amphimedon queenslandica]	3.7201	4.77108	3.83463	6.56302	6.14408	5.87931	0.663163	-0.592566	0.0404808	0.808063	down	no
MSTRG.6128	Em0002g172a	Em0002g172a.t1	NA	NA	NA	NA	PREDICTED: uncharacterized protein LOC109585561 [Amphimedon queenslandica]	5.22873	2.44386	6.531	3.86533	2.65089	2.56302	1.5644	0.645613	0.0405235	0.8081	up	no
MSTRG.27814	Em0022g692a	Em0022g692a.t1	GO:0005634(nucleus);GO:0015630(microtubule cytoskeleton)	04110(Cell cycle);04218(Cellular senescence);04914(Progesterone-mediated oocyte maturation)	K06627	NA	PREDICTED: cyclin-A1 [Callorhinchus milii]	6.71074	8.07122	10.8204	9.89809	14.5626	15.6801	0.637814	-0.648792	0.0406885	0.810574	down	no
MSTRG.10606	Em0006g916a	Em0006g916a.t1	GO:0005201(extracellular matrix structural constituent);GO:0005587(collagen type IV trimer);GO:0007528(neuromuscular junction development);GO:0031594(neuromuscular junction)	04512(ECM-receptor interaction);04510(Focal adhesion);04933(AGE-RAGE signaling pathway in diabetic complications)	K06237	NA	collagen alpha-3(IV) chain-like, partial [Paramormyrops kingsleyae]	14.0037	17.283	16.2331	20.6538	24.0857	22.7076	0.704549	-0.505229	0.0408827	0.813623	down	no
MSTRG.27178	Em0022g61a	Em0022g61a.t1	NA	NA	NA	NA	silintaphin-1 [Suberites domuncula]	69.0465	61.8896	59.339	52.7199	49.5627	51.6122	1.2364	0.306144	0.0411883	0.815603	up	no
MSTRG.2296	Em0001g2812a;Em0001g2805a;Em0001g2802a;Em0001g2808a	Em0001g2812a.t1;Em0001g2805a.t1;Em0001g2802a.t1;Em0001g2808a.t1	NA	NA	NA	NA		6.62989	4.88097	8.82994	6.31729	4.11813	4.70128	1.34381	0.426326	0.0418216	0.825663	up	no
MSTRG.3394	Em0002g38a	Em0002g38a.t1	GO:0000790(nuclear chromatin);GO:0003677(DNA binding);GO:0006342(chromatin silencing)	NA	NA	NA	PREDICTED: histone H2A.v [Amphimedon queenslandica]	33.1813	44.8971	40.882	44.8135	62.4783	70.2842	0.669912	-0.577955	0.0419999	0.82696	down	no
MSTRG.11607	Em0007g708a	Em0007g708a.t1	NA	NA	NA	NA		1.04436	1.81512	1.06363	2.06891	2.53936	2.73757	0.534058	-0.904932	0.0420223	0.82696	down	no
MSTRG.9938	Em0006g461a	Em0006g461a.t1	GO:0006629(lipid metabolic process);GO:0008374(O-acyltransferase activity)	00564(Glycerophospholipid metabolism);04142(Lysosome)	K06129	EC:3.1.1.5	PREDICTED: group XV phospholipase A2-like isoform X2 [Amphimedon queenslandica]	26.5865	19.849	19.0055	29.4053	28.3202	34.6463	0.708452	-0.497258	0.04208	0.82696	down	no
MSTRG.19157	Em0014g538a	Em0014g538a.t1	GO:0000166(nucleotide binding);GO:0005254(chloride channel activity);GO:0005524(ATP binding);GO:0005886(plasma membrane);GO:0005887(integral component of plasma membrane);GO:0006811(ion transport);GO:0015562(efflux transmembrane transporter activity);GO:0016020(membrane);GO:0016021(integral component of membrane);GO:0016887(ATPase activity);GO:0042626(ATPase activity, coupled to transmembrane mov…	02010(ABC transporters)	K05673	NA	PREDICTED: multidrug resistance-associated protein 4-like isoform X2 [Amphimedon queenslandica]	0.478419	0.49104	0.286683	0.632036	0.766964	1.03132	0.516863	-0.952146	0.0421059	0.82696	down	no
MSTRG.9917	Em0006g482a	Em0006g482a.t1	NA	NA	NA	NA		2.29833	3.07764	1.49226	3.60173	3.54738	5.12773	0.559446	-0.83793	0.0422729	0.828783	down	no
MSTRG.20102	Em0015g323a	Em0015g323a.t1	GO:0000788(nuclear nucleosome);GO:0006334(nucleosome assembly);GO:0031492(nucleosomal DNA binding);GO:0046982(protein heterodimerization activity)	NA	NA	NA	PREDICTED: LOW QUALITY PROTEIN: uncharacterized protein LOC106000001 [Dipodomys ordii]	73.071	138.872	154.805	128.95	246.547	238.858	0.596964	-0.744285	0.0426454	0.834074	down	no
MSTRG.32829	Em1076g1a	Em1076g1a.t1	GO:0004842(ubiquitin-protein transferase activity);GO:0005634(nucleus);GO:0005737(cytoplasm)	04120(Ubiquitin mediated proteolysis)	K10595	EC:2.3.2.26	PREDICTED: E3 ubiquitin-protein ligase HERC2 isoform X1 [Amphimedon queenslandica]	5.71965	2.14043	3.67364	5.81632	7.7457	5.08667	0.618474	-0.693216	0.0427434	0.834074	down	no
MSTRG.5649	Em0003g1178a	Em0003g1178a.t1	GO:0004709(MAP kinase kinase kinase activity);GO:0004713(protein tyrosine kinase activity);GO:0004714(transmembrane receptor protein tyrosine kinase activity);GO:0004888(transmembrane signaling receptor activity);GO:0005005(transmembrane-ephrin receptor activity);GO:0005524(ATP binding);GO:0005737(cytoplasm);GO:0005887(integral component of plasma membrane);GO:0006468(protein phosphorylation);GO:…	NA	NA	NA	PREDICTED: uncharacterized protein LOC100641922 [Amphimedon queenslandica]	1.7649	2.08027	3.08167	1.39326	1.47951	1.23974	1.68434	0.752179	0.0427894	0.834074	up	no
MSTRG.16800	Em0012g82a	Em0012g82a.t1	GO:0005737(cytoplasm)	NA	NA	NA	PREDICTED: serine/threonine-protein kinase 11-interacting protein-like [Amphimedon queenslandica]	7.71371	7.41025	7.49443	5.72858	6.1028	6.24959	1.25095	0.323024	0.0428429	0.834074	up	no
MSTRG.10096	Em0006g119a	Em0006g119a.t1	NA	00230(Purine metabolism)	K01587	EC:4.1.1.21;EC:6.3.2.6	Tetratricopeptide repeat protein 28 [Stylophora pistillata]	2.65294	2.32719	2.13532	1.87616	1.43525	1.63249	1.43924	0.525308	0.0428801	0.834074	up	no
MSTRG.15033	Em0010g204a	Em0010g204a.t1	GO:0005615(extracellular space);GO:0005829(cytosol);GO:0006955(immune response);GO:0016021(integral component of membrane)	NA	NA	NA	fibrocystin-L-like isoform X1 [Orbicella faveolata]	19.4227	15.6874	18.2964	15.2423	14.0679	13.5033	1.24743	0.318954	0.0429729	0.835059	up	no
MSTRG.8495	Em0005g165a	Em0005g165a.t1	GO:0002181(cytoplasmic translation);GO:0003735(structural constituent of ribosome);GO:0005634(nucleus);GO:0005737(cytoplasm);GO:0006412(translation);GO:0006464(cellular protein modification process);GO:0006511(ubiquitin-dependent protein catabolic process);GO:0016567(protein ubiquitination);GO:0019941(modification-dependent protein catabolic process);GO:0022625(cytosolic large ribosomal subunit);…	03010(Ribosome)	K02927	NA	Ubiquitin-60S ribosomal protein L40 [Trichoplax sp. H2]	23.6497	6.40684	20.0651	25.3003	22.7834	44.8181	0.539511	-0.890275	0.0433144	0.840869	down	no
MSTRG.7619	Em0004g975a	Em0004g975a.t1	NA	NA	NA	NA		0.9656	1.09527	0.915636	1.67198	1.36366	2.3228	0.55548	-0.848193	0.0435025	0.843693	down	no
MSTRG.30227	Em0046g14a;Em0046g5a;Em0046g23a	Em0046g14a.t1;Em0046g5a.t1;Em0046g23a.t1	GO:0004715(non-membrane spanning protein tyrosine kinase activity);GO:0005102(receptor binding);GO:0007169(transmembrane receptor protein tyrosine kinase signaling pathway);GO:0016477(cell migration);GO:0030154(cell differentiation);GO:0031234(extrinsic component of cytoplasmic side of plasma membrane);GO:0038083(peptidyl-tyrosine autophosphorylation);GO:0042127(regulation of cell proliferation);…	NA	NA	NA	PREDICTED: uncharacterized protein LOC100635491 [Amphimedon queenslandica];PREDICTED: uncharacterized protein LOC100638128 isoform X2 [Amphimedon queenslandica]	0.671363	0.676611	0.714049	0.986014	1.01842	1.12744	0.658398	-0.602968	0.0435751	0.844273	down	no
MSTRG.22133	Em0017g70a	Em0017g70a.t1	GO:0003707(steroid hormone receptor activity);GO:0005496(steroid binding);GO:0005886(plasma membrane);GO:0007275(multicellular organism development);GO:0008289(lipid binding);GO:0016020(membrane);GO:0016021(integral component of membrane);GO:0030154(cell differentiation);GO:0048477(oogenesis)	04920(Adipocytokine signaling pathway)	K07297	NA	PREDICTED: progestin and adipoQ receptor family member 6-like [Amphimedon queenslandica]	3.90755	5.45961	3.8863	3.26791	2.84726	2.47849	1.54224	0.625025	0.0437125	0.846106	up	no
MSTRG.17236	Em0012g529a;Em0012g549a	Em0012g529a.t1;Em0012g549a.t1	GO:0005044(scavenger receptor activity);GO:0005615(extracellular space);GO:0006898(receptor-mediated endocytosis);GO:0030670(phagocytic vesicle membrane);GO:0070062(extracellular exosome);GO:0002221(pattern recognition receptor signaling pathway);GO:0005515(protein binding);GO:0005576(extracellular region);GO:0005737(cytoplasm);GO:0007275(multicellular organism development);GO:0008329(signaling p…	04970(Salivary secretion);04970(Salivary secretion)	K13912	NA	PREDICTED: deleted in malignant brain tumors 1 protein-like [Amphimedon queenslandica];PREDICTED: deleted in malignant brain tumors 1 protein-like, partial [Amphimedon queenslandica]	6.44435	5.76739	3.14462	4.94113	3.07791	2.84728	1.41321	0.498972	0.0438081	0.846625	up	no
MSTRG.27274	Em0022g133a	Em0022g133a.t1	GO:0003777(microtubule motor activity);GO:0007018(microtubule-based movement);GO:0030286(dynein complex);GO:0070062(extracellular exosome)	NA	NA	NA	hypothetical protein BRAFLDRAFT_102421 [Branchiostoma floridae]	1.20777	2.23548	2.69075	3.09676	4.25145	3.26123	0.578164	-0.79045	0.0438867	0.846993	down	no
MSTRG.21035	Em0016g61a	Em0016g61a.t1	GO:0000166(nucleotide binding);GO:0001558(regulation of cell growth);GO:0003777(microtubule motor activity);GO:0005524(ATP binding);GO:0005634(nucleus);GO:0005737(cytoplasm);GO:0005829(cytosol);GO:0005856(cytoskeleton);GO:0005871(kinesin complex);GO:0005874(microtubule);GO:0005886(plasma membrane);GO:0007018(microtubule-based movement);GO:0007019(microtubule depolymerization);GO:0007080(mitotic m…	NA	NA	NA	PREDICTED: kinesin-like protein KIF14 [Amphimedon queenslandica]	0.595888	1.13933	1.58253	1.55899	2.1877	2.66033	0.51783	-0.949451	0.0440077	0.847673	down	no
MSTRG.11002	Em0006g1376a	Em0006g1376a.t1	GO:0005737(cytoplasm);GO:0005925(focal adhesion);GO:0030506(ankyrin binding);GO:0042383(sarcolemma);GO:0048747(muscle fiber development);GO:0051015(actin filament binding)	NA	NA	NA	filamin-A-like isoform X5 [Orbicella faveolata]	2.75242	3.50898	2.07748	3.49739	4.64378	4.61467	0.653731	-0.613232	0.0440714	0.848074	down	no
MSTRG.17607	Em0012g793a	Em0012g793a.t1	GO:0000166(nucleotide binding);GO:0000281(mitotic cytokinesis);GO:0000331(contractile vacuole);GO:0004672(protein kinase activity);GO:0004674(protein serine/threonine kinase activity);GO:0005516(calmodulin binding);GO:0005524(ATP binding);GO:0005737(cytoplasm);GO:0005773(vacuole);GO:0005826(actomyosin contractile ring);GO:0005829(cytosol);GO:0006468(protein phosphorylation);GO:0006971(hypotonic r…	NA	NA	NA	PREDICTED: alpha-protein kinase vwkA-like [Amphimedon queenslandica]	20.2012	35.8099	15.9438	27.7628	32.4189	59.8779	0.599328	-0.738583	0.044134	0.848453	down	no
MSTRG.11177	Em0007g145a;Em0007g127a;Em0007g152a	Em0007g145a.t1;Em0007g127a.t1;Em0007g152a.t1	GO:0005811(lipid droplet);GO:0035267(NuA4 histone acetyltransferase complex);GO:0000786(nucleosome);GO:0003677(DNA binding);GO:0005634(nucleus);GO:0005694(chromosome);GO:0046982(protein heterodimerization activity);GO:0035267(NuA4 histone acetyltransferase complex)	NA	NA	NA	PREDICTED: late histone H2B.L4-like [Amphimedon queenslandica]	13.1704	19.45	23.6604	16.7931	38.32	39.7016	0.593588	-0.752466	0.0442327	0.849526	down	no
MSTRG.6606	Em0003g1892a	Em0003g1892a.t1	NA	NA	NA	NA	PREDICTED: uncharacterized protein LOC102808229 [Saccoglossus kowalevskii]	1.50578	0.887261	1.3099	0.781562	0.625418	0.892478	1.61035	0.687377	0.044625	0.854055	up	no
MSTRG.18258	Em0013g446a	Em0013g446a.t1	GO:0005634(nucleus);GO:0048471(perinuclear region of cytoplasm)	NA	NA	NA	PREDICTED: nmrA-like family domain-containing protein 1 [Amphimedon queenslandica]	40.0176	33.8208	37.6755	52.1969	53.9043	48.5251	0.721183	-0.471563	0.0446844	0.854055	down	no
MSTRG.27800	Em0022g656a	Em0022g656a.t1	GO:0016020(membrane);GO:0016021(integral component of membrane);GO:0016491(oxidoreductase activity);GO:0051537(2 iron, 2 sulfur cluster binding);GO:0055114(oxidation-reduction process)	00981(Insect hormone biosynthesis)	K14938	EC:1.14.19.21	PREDICTED: cholesterol 7-desaturase-like [Amphimedon queenslandica]	10.0677	10.8418	11.2333	8.2752	7.99501	9.34704	1.25473	0.327382	0.0449127	0.85759	up	no
MSTRG.26236	Em0021g70a	Em0021g70a.t1	GO:0002181(cytoplasmic translation);GO:0003735(structural constituent of ribosome);GO:0022625(cytosolic large ribosomal subunit);GO:0042273(ribosomal large subunit biogenesis)	03010(Ribosome)	K02917	NA	60S ribosomal protein L35a [Trichoplax sp. H2]	18.5087	15.3277	13.1341	17.9744	26.6489	24.4257	0.680249	-0.555865	0.045074	0.859012	down	no
MSTRG.22113	Em0016g1169a	Em0016g1169a.t1	NA	NA	NA	NA	PREDICTED: uncharacterized protein LOC109582786 [Amphimedon queenslandica]	5.05206	5.38882	4.23687	6.58145	7.28081	8.61345	0.65305	-0.614735	0.0451303	0.859256	down	no
MSTRG.6472	Em0003g1623a;Em0003g1622a;Em0003g1628a;Em0003g1616a;Em0003g1626a	Em0003g1623a.t1;Em0003g1622a.t1;Em0003g1628a.t1;Em0003g1616a.t1;Em0003g1626a.t1	GO:0005001(transmembrane receptor protein tyrosine phosphatase activity);GO:0005515(protein binding);GO:0005886(plasma membrane);GO:0005887(integral component of plasma membrane);GO:0007155(cell adhesion);GO:0007268(chemical synaptic transmission);GO:0021510(spinal cord development);GO:0021549(cerebellum development);GO:0021766(hippocampus development);GO:0021987(cerebral cortex development);GO:0…	04512(ECM-receptor interaction);04512(ECM-receptor interaction)	K06252	NA	PREDICTED: uncharacterized protein LOC105313185 [Amphimedon queenslandica];Protein sidekick-2, partial [Trichoplax sp. H2];PREDICTED: LOW QUALITY PROTEIN: tenascin-X-like [Branchiostoma belcheri];hypothetical protein BRAFLDRAFT_124749 [Branchiostoma floridae]	1.35872	2.12134	1.65946	2.31688	2.93672	2.35158	0.675792	-0.565348	0.0453436	0.861658	down	no
MSTRG.30186	Em0044g27a	Em0044g27a.t1	GO:0004012(phospholipid-translocating ATPase activity);GO:0005794(Golgi apparatus);GO:0005886(plasma membrane);GO:0007030(Golgi organization)	NA	NA	NA	PREDICTED: phospholipid-transporting ATPase ID [Amphimedon queenslandica]	6.0004	5.75718	4.88957	7.48849	7.1931	8.56871	0.715997	-0.481975	0.045476	0.863345	down	no
MSTRG.8258	Em0004g1737a	Em0004g1737a.t1	GO:0005794(Golgi apparatus);GO:0008376(acetylgalactosaminyltransferase activity);GO:0016020(membrane);GO:0016021(integral component of membrane);GO:0016740(transferase activity);GO:0016757(transferase activity, transferring glycosyl groups);GO:0032580(Golgi cisterna membrane)	00532(Glycosaminoglycan biosynthesis - chondroitin sulfate / dermatan sulfate)	K13499	EC:2.4.1.175;EC:2.4.1.226	chondroitin sulfate synthase 1-like [Orbicella faveolata]	0.767352	0.710401	1.08638	1.8407	1.97586	1.06252	0.525536	-0.92814	0.0455957	0.863483	down	no
MSTRG.11128	Em0007g212a	Em0007g212a.t1	GO:0000786(nucleosome);GO:0003677(DNA binding);GO:0005634(nucleus);GO:0005694(chromosome);GO:0046982(protein heterodimerization activity)	NA	NA	NA	PREDICTED: late histone H2B.L4-like [Amphimedon queenslandica]	24.2541	51.4105	54.7312	50.9834	75.4041	94.4667	0.590416	-0.760197	0.0456091	0.863483	down	no
MSTRG.5383	Em0003g593a	Em0003g593a.t1	GO:0005262(calcium channel activity);GO:0016020(membrane);GO:0050982(detection of mechanical stimulus)	NA	NA	NA	leucine-rich repeat and IQ domain-containing protein 1-like [Exaiptasia pallida]	2.1403	2.50969	2.50707	3.21763	3.53758	3.84387	0.675252	-0.566501	0.0456142	0.863483	down	no
MSTRG.24693	Em0019g734a	Em0019g734a.t1	NA	NA	NA	NA		5.06725	3.47528	3.8619	3.00631	2.03857	2.00839	1.75867	0.814489	0.0456846	0.863964	up	no
MSTRG.17286	Em0011g1023a	Em0011g1023a.t1	GO:0000122(negative regulation of transcription by RNA polymerase II);GO:0001103(RNA polymerase II repressing transcription factor binding);GO:0005515(protein binding);GO:0005700(polytene chromosome);GO:0006325(chromatin organization);GO:0006334(nucleosome assembly);GO:0007517(muscle organ development);GO:0017053(transcriptional repressor complex);GO:0033186(CAF-1 complex);GO:0035059(RCAF complex…	NA	NA	NA	PREDICTED: histone chaperone asf1b-B-like [Branchiostoma belcheri]	4.34351	4.35829	4.51481	6.23257	5.85238	6.44976	0.713073	-0.487877	0.045727	0.863964	down	no
MSTRG.10399	Em0006g742a	Em0006g742a.t1	NA	NA	NA	NA		1.43431	1.4541	1.36722	0.846622	0.869464	1.26667	1.42674	0.512723	0.0460358	0.868142	up	no
MSTRG.25173	Em0020g64a	Em0020g64a.t1	GO:0004197(cysteine-type endopeptidase activity);GO:0005615(extracellular space);GO:0005764(lysosome);GO:0051603(proteolysis involved in cellular protein catabolic process)	04145(Phagosome);04142(Lysosome);04140(Autophagy - animal)	K01365	EC:3.4.22.15	cathepsin L2 [Lubomirskia baicalensis]	5.43622	5.3361	13.2203	5.36217	5.18526	4.20165	1.62672	0.701968	0.0461797	0.869197	up	no
MSTRG.29271	Em0024g497a	Em0024g497a.t1	GO:0005654(nucleoplasm)	NA	NA	NA	coiled-coil domain-containing protein 174 [Patagioenas fasciata monilis]	0.92233	0.555186	0.976308	1.5347	1.23561	1.86593	0.52927	-0.917923	0.0462313	0.869342	down	no
MSTRG.22290	Em0017g200a	Em0017g200a.t1	NA	NA	NA	NA		7.79242	10.3654	7.91208	10.0044	13.3903	17.3382	0.640021	-0.643808	0.0463484	0.870323	down	no
MSTRG.9061	Em0005g1009a	Em0005g1009a.t1	GO:0003674(molecular_function);GO:0008150(biological_process)	00982(Drug metabolism - cytochrome P450)	K00485	EC:1.14.13.8	dimethylaniline monooxygenase [N-oxide-forming] 5-like [Orbicella faveolata]	2.62009	2.67078	1.84796	4.15655	3.61323	3.94129	0.609579	-0.714114	0.0463715	0.870323	down	no
MSTRG.31427	Em0194g1a	Em0194g1a.t1	GO:0004536(deoxyribonuclease activity);GO:0006308(DNA catabolic process)	04621(NOD-like receptor signaling pathway)	K04612	NA	Transposon Ty3-I Gag-Pol polyprotein [Trichinella britovi]	0.339571	0.35476	0.615052	0.302809	0.146314	0.24036	1.89908	0.9253	0.0464485	0.870378	up	no
MSTRG.18031	Em0013g99a;Em0013g97a	Em0013g99a.t1;Em0013g97a.t1	GO:0004252(serine-type endopeptidase activity);GO:0005789(endoplasmic reticulum membrane);GO:0016485(protein processing);GO:0042058(regulation of epidermal growth factor receptor signaling pathway);GO:0050708(regulation of protein secretion);GO:0050708(regulation of protein secretion)	NA	NA	NA	PREDICTED: inactive rhomboid protein 1-like [Amphimedon queenslandica]	22.8593	19.3205	21.2615	17.9586	16.5597	17.0644	1.2299	0.298538	0.0465226	0.870378	up	no
MSTRG.20665	Em0015g1017a	Em0015g1017a.t1	NA	NA	NA	NA		1.20194	1.525	1.32597	0.620916	0.791781	0.979756	1.69404	0.760467	0.0465944	0.870378	up	no
MSTRG.4243	Em0002g1212a;Em0002g1172a;Em0002g1183a;Em0002g1174a;Em0002g1167a;Em0002g1211a;Em0002g1201a	Em0002g1212a.t1;Em0002g1172a.t1;Em0002g1183a.t1;Em0002g1174a.t1;Em0002g1167a.t1;Em0002g1211a.t1;Em0002g1201a.t1	NA	NA	NA	NA	kinesin kif17 [Brachionus plicatilis]	10.0514	8.42157	8.41107	5.64996	6.86256	8.84923	1.25852	0.331723	0.0466938	0.87043	up	no
MSTRG.17827	Em0012g1045a	Em0012g1045a.t1	NA	NA	NA	NA		13.2641	11.7565	14.812	7.67172	11.3727	10.595	1.34391	0.426436	0.0467182	0.87043	up	no
MSTRG.28595	Em0023g552a	Em0023g552a.t1	NA	NA	NA	NA		3.19908	3.41517	2.63238	1.90794	2.09297	2.81969	1.35569	0.439027	0.0468591	0.871209	up	no
MSTRG.18067	Em0013g234a	Em0013g234a.t1	NA	NA	NA	NA		1.23504	1.23923	1.2958	1.93588	2.26528	2.04089	0.603979	-0.727429	0.0469392	0.87188	down	no
MSTRG.28209	Em0023g75a	Em0023g75a.t1	GO:0005634(nucleus);GO:0005737(cytoplasm);GO:0005815(microtubule organizing center);GO:0005856(cytoskeleton);GO:0005874(microtubule);GO:0005929(cilium);GO:0030030(cell projection organization);GO:0030317(flagellated sperm motility);GO:0036126(sperm flagellum);GO:0036159(inner dynein arm assembly);GO:0042995(cell projection);GO:0060271(cilium assembly);GO:0060294(cilium movement involved in cell m…	NA	NA	NA	PREDICTED: tektin-2-like [Amphimedon queenslandica]	3.04573	2.80056	4.60601	4.60475	5.66116	7.27876	0.595753	-0.747213	0.0470391	0.872916	down	no
MSTRG.5895	Em0003g1369a	Em0003g1369a.t1	NA	NA	NA	NA		21.0416	12.6178	12.8296	10.1992	10.0957	13.7382	1.36599	0.449946	0.0473726	0.875889	up	no
MSTRG.23032	Em0018g200a	Em0018g200a.t1	GO:0004536(deoxyribonuclease activity);GO:0006308(DNA catabolic process)	04621(NOD-like receptor signaling pathway)	K04612	NA	Transposon Ty3-I Gag-Pol polyprotein [Trichinella sp. T6]	0.512554	0.556896	0.856777	0.49012	0.240488	0.397734	1.70713	0.771573	0.0473765	0.875889	up	no
MSTRG.4264	Em0002g1210a;Em0002g1192a;Em0002g1189a	Em0002g1210a.t1;Em0002g1192a.t1;Em0002g1189a.t1	GO:0003676(nucleic acid binding);GO:0015074(DNA integration)	NA	NA	NA	putative gypsy retrotransposon integrase-like protein 1-like [Apostichopus japonicus]	27.9738	20.0715	13.1833	15.2207	12.542	18.3264	1.32848	0.409781	0.0476614	0.878693	up	no
MSTRG.268	Em0001g330a;Em0001g329a	Em0001g330a.t1;Em0001g329a.t1	GO:0005044(scavenger receptor activity);GO:0006909(phagocytosis);GO:0016020(membrane);GO:0016021(integral component of membrane);GO:0042742(defense response to bacterium)	NA	NA	NA	piggyBac transposable element-derived protein 4-like [Pocillopora damicornis]	7.04592	5.73653	5.51635	5.1611	4.82231	4.54004	1.25995	0.333366	0.0477927	0.879475	up	no
MSTRG.19170	Em0014g552a	Em0014g552a.t1	GO:0000790(nuclear chromatin);GO:0003677(DNA binding);GO:0006342(chromatin silencing)	NA	NA	NA	histone H2A-like [Acanthaster planci]	46.7814	56.7842	59.5504	65.1743	86.0403	84.055	0.693315	-0.528418	0.0478869	0.879517	down	no
MSTRG.22524	Em0017g489a	Em0017g489a.t1	NA	NA	NA	NA		125.509	128.148	179.694	242.76	192.727	195.356	0.686937	-0.54175	0.0479398	0.879517	down	no
MSTRG.11043	Em0007g11a	Em0007g11a.t1	GO:0006605(protein targeting);GO:0015450(P-P-bond-hydrolysis-driven protein transmembrane transporter activity);GO:0016020(membrane)	03060(Protein export);04141(Protein processing in endoplasmic reticulum);04145(Phagosome)	K07342	NA	PREDICTED: protein transport protein Sec61 subunit gamma [Rhagoletis zephyria]	7.27228	12.5719	5.72315	5.66904	5.60426	7.15467	1.38742	0.472404	0.0479903	0.879517	up	no
MSTRG.20861	Em0015g1198a	Em0015g1198a.t1	NA	NA	NA	NA	PREDICTED: uncharacterized protein LOC109588230 [Amphimedon queenslandica]	1.0603	0.903333	0.501595	1.44956	1.42073	1.67975	0.541803	-0.884159	0.0480173	0.879517	down	no
MSTRG.11445	Em0007g490a	Em0007g490a.t1	NA	NA	NA	NA	PREDICTED: uncharacterized protein LOC109583938 [Amphimedon queenslandica]	21.2589	13.3477	16.9963	16.7106	10.8241	10.9782	1.33989	0.422114	0.0481651	0.880286	up	no
MSTRG.28755	Em0023g737a	Em0023g737a.t1	GO:0000002(mitochondrial genome maintenance);GO:0005634(nucleus);GO:0005657(replication fork);GO:0005739(mitochondrion);GO:0006260(DNA replication);GO:0010521(telomerase inhibitor activity);GO:0032211(negative regulation of telomere maintenance via telomerase);GO:0032508(DNA duplex unwinding);GO:0043141(ATP-dependent 5'-3' DNA helicase activity);GO:0044806(G-quadruplex DNA unwinding);GO:0051974(n…	NA	NA	NA	PREDICTED: uncharacterized protein LOC105314614, partial [Amphimedon queenslandica]	0.980297	0.486141	0.731677	1.64914	0.749569	1.33576	0.588602	-0.764636	0.0482973	0.880568	down	no
MSTRG.14382	Em0009g957a	Em0009g957a.t1	GO:0005201(extracellular matrix structural constituent);GO:0005886(plasma membrane);GO:0007160(cell-matrix adhesion);GO:0007605(sensory perception of sound);GO:0031225(anchored component of membrane)	NA	NA	NA	sushi, nidogen and EGF-like domain-containing protein 1 [Crassostrea virginica]	4.32228	4.14035	1.94526	1.30828	1.71193	3.11794	1.69561	0.761802	0.0483923	0.880971	up	no
MSTRG.8393	Em0005g197a;Em0005g183a	Em0005g197a.t1;Em0005g183a.t1	GO:0004843(thiol-dependent ubiquitin-specific protease activity);GO:0005737(cytoplasm);GO:0006511(ubiquitin-dependent protein catabolic process);GO:0008587(imaginal disc-derived wing margin morphogenesis);GO:0016322(neuron remodeling);GO:0016579(protein deubiquitination);GO:0045880(positive regulation of smoothened signaling pathway);GO:0090263(positive regulation of canonical Wnt signaling pathw…	04217(Necroptosis);04144(Endocytosis);04137(Mitophagy - animal)	K21634;K11839	EC:3.4.19.12	PREDICTED: ubiquitin carboxyl-terminal hydrolase 8-like [Aplysia californica];PREDICTED: inactive ubiquitin carboxyl-terminal hydrolase 50 [Dipodomys ordii]	1.61286	0.823627	1.02298	2.15328	1.90092	1.77182	0.593796	-0.751962	0.0484529	0.880971	down	no
MSTRG.24787	Em0019g903a	Em0019g903a.t1	GO:0003735(structural constituent of ribosome);GO:0006412(translation)	NA	NA	NA	PREDICTED: mitochondrial basic amino acids transporter-like [Amphimedon queenslandica]	3.32869	2.67921	3.67198	2.39613	2.23132	1.85119	1.49412	0.579299	0.04856	0.882107	up	no
MSTRG.4846	Em0003g63a	Em0003g63a.t1	GO:0000775(chromosome, centromeric region);GO:0000776(kinetochore);GO:0000922(spindle pole);GO:0000930(gamma-tubulin complex);GO:0005694(chromosome);GO:0005730(nucleolus);GO:0005737(cytoplasm);GO:0005813(centrosome);GO:0005856(cytoskeleton);GO:0005886(plasma membrane);GO:0007049(cell cycle);GO:0007051(spindle organization);GO:0007098(centrosome cycle);GO:0008017(microtubule binding);GO:0030951(es…	NA	NA	NA	PREDICTED: cytoskeleton-associated protein 5-like [Acropora digitifera]	2.71244	2.0876	3.47777	4.52472	4.7104	4.7484	0.591969	-0.756406	0.048826	0.885671	down	no
MSTRG.24061	Em0019g90a;Em0019g81a	Em0019g90a.t1;Em0019g81a.t1	NA	NA	NA	NA	PREDICTED: annexin A7-like [Amphimedon queenslandica]	7.15539	7.09448	5.43791	8.2921	10.3229	9.81501	0.6925	-0.530113	0.0488811	0.885671	down	no
MSTRG.11700	Em0007g893a	Em0007g893a.t1	GO:0000719(photoreactive repair);GO:0003904(deoxyribodipyrimidine photo-lyase activity)	04010(MAPK signaling pathway);04510(Focal adhesion)	K05096	EC:2.7.10.1	LReO_3 [Oryzias latipes]	0.82467	0.638581	0.691377	1.11332	1.07534	1.46835	0.589178	-0.763225	0.0489305	0.885671	down	no
MSTRG.23171	Em0018g277a;Em0018g273a	Em0018g277a.t1;Em0018g273a.t1	GO:0000788(nuclear nucleosome);GO:0003677(DNA binding);GO:0006334(nucleosome assembly);GO:0000784(nuclear chromosome, telomeric region);GO:0000786(nucleosome);GO:0005654(nucleoplasm);GO:0006335(DNA replication-dependent nucleosome assembly);GO:0006336(DNA replication-independent nucleosome assembly);GO:0006352(DNA-templated transcription, initiation);GO:0016020(membrane);GO:0019904(protein domain…	05203(Viral carcinogenesis);05322(Systemic lupus erythematosus);05034(Alcoholism);05034(Alcoholism)	K11254	NA	PREDICTED: histone H3-like centromeric protein CSE4 [Pseudopodoces humilis];histone H3.1-like [Pan paniscus]	2.70592	2.47937	2.50094	3.40138	5.23127	3.54496	0.631177	-0.663884	0.0489353	0.885671	down	no
MSTRG.9178	Em0005g1091a	Em0005g1091a.t1	GO:0005198(structural molecule activity);GO:0005737(cytoplasm);GO:0005886(plasma membrane);GO:0030017(sarcomere);GO:0043005(neuron projection);GO:0044297(cell body);GO:0050839(cell adhesion molecule binding)	NA	NA	NA	PREDICTED: gamma-2-syntrophin-like [Amphimedon queenslandica]	6.37863	5.224	4.5212	7.63328	7.50081	8.49268	0.682439	-0.551229	0.0490194	0.886381	down	no
MSTRG.12481	Em0008g28a	Em0008g28a.t1	GO:0005634(nucleus);GO:0006281(DNA repair);GO:0016301(kinase activity)	04150(mTOR signaling pathway);04140(Autophagy - animal);04136(Autophagy - other eukaryotes)	K07203	EC:2.7.11.1	PREDICTED: serine/threonine-protein kinase mTOR-like, partial [Amphimedon queenslandica]	2.03198	2.48428	2.10319	3.25978	4.00902	3.49927	0.61473	-0.701974	0.0491936	0.887218	down	no
MSTRG.11129	Em0007g213a	Em0007g213a.t1	GO:0000790(nuclear chromatin);GO:0003677(DNA binding);GO:0006342(chromatin silencing)	NA	NA	NA	histone H2A-like [Acanthaster planci]	11.8055	21.5712	26.1588	22.7266	37.5425	39.597	0.596153	-0.746245	0.0492626	0.887218	down	no
MSTRG.14704	Em0009g1095a	Em0009g1095a.t1	GO:0000724(double-strand break repair via homologous recombination);GO:0003677(DNA binding);GO:0005634(nucleus);GO:0005694(chromosome);GO:0005737(cytoplasm);GO:0009378(four-way junction helicase activity);GO:0043140(ATP-dependent 3'-5' DNA helicase activity)	03440(Homologous recombination);03460(Fanconi anemia pathway)	K10901	EC:3.6.4.12	Bloom syndrome protein-like [Mizuhopecten yessoensis]	4.09591	3.10753	3.74864	6.0568	4.74647	5.26602	0.681554	-0.5531	0.0492804	0.887218	down	no
MSTRG.18376	Em0013g615a;Em0013g619a;Em0013g614a	Em0013g615a.t1;Em0013g619a.t1;Em0013g614a.t1	GO:0004177(aminopeptidase activity);GO:0005622(intracellular);GO:0005737(cytoplasm);GO:0006508(proteolysis);GO:0008235(metalloexopeptidase activity);GO:0019538(protein metabolic process);GO:0030145(manganese ion binding);GO:0030145(manganese ion binding)	00480(Glutathione metabolism);00480(Glutathione metabolism)	K01255	EC:3.4.11.1	putative aminopeptidase W07G4.4 [Acanthaster planci]	3.03752	2.89479	3.14002	3.36326	3.72532	6.89155	0.648944	-0.623833	0.0493132	0.887218	down	no
MSTRG.63	Em0001g95a	Em0001g95a.t1	GO:0007616(long-term memory);GO:0008344(adult locomotory behavior);GO:0042428(serotonin metabolic process);GO:0042748(circadian sleep/wake cycle, non-REM sleep);GO:0050951(sensory perception of temperature stimulus);GO:0060586(multicellular organismal iron ion homeostasis);GO:1900242(regulation of synaptic vesicle endocytosis)	NA	NA	NA	BTB/POZ domain-containing protein 9-like [Ciona intestinalis]	5.39584	4.3285	5.17759	7.24585	7.40686	7.43809	0.674577	-0.567946	0.0493856	0.887326	down	no
MSTRG.17514	Em0012g571a	Em0012g571a.t1	NA	NA	NA	NA		1.11717	1.00912	0.99852	1.83284	1.85512	2.37793	0.515145	-0.956949	0.0494746	0.888119	down	no
MSTRG.12299	Em0007g1471a	Em0007g1471a.t1	NA	NA	NA	NA		1.51539	2.17549	0.924218	2.69872	2.54913	3.7481	0.51302	-0.962913	0.0496401	0.890281	down	no
MSTRG.7534	Em0004g960a	Em0004g960a.t1	NA	04141(Protein processing in endoplasmic reticulum);04140(Autophagy - animal)	K08852	EC:2.7.11.1;EC:3.1.26.-	PREDICTED: uncharacterized protein LOC109583691 [Amphimedon queenslandica]	21.9667	20.4375	21.8454	31.7603	26.1538	31.0948	0.721834	-0.470261	0.0497352	0.891179	down	no
MSTRG.21544	Em0016g584a	Em0016g584a.t1	NA	NA	NA	NA		2.08012	0.883928	5.20475	1.63097	1.33924	0.920111	2.09978	1.07023	0.0500228	0.895522	up	no
MSTRG.22877	Em0018g50a	Em0018g50a.t1	GO:0005575(cellular_component);GO:0016491(oxidoreductase activity);GO:0055114(oxidation-reduction process)	00330(Arginine and proline metabolism);00410(beta-Alanine metabolism)	K13366	EC:1.5.3.14;EC:1.5.3.16	PREDICTED: polyamine oxidase-like [Branchiostoma belcheri]	58.1978	43.5058	41.3153	43.0553	33.231	38.1376	1.2499	0.321817	0.0500937	0.895934	up	no
Em0001g3634a	Em0001g3634a	Em0001g3634a.t1	GO:0004536(deoxyribonuclease activity);GO:0006308(DNA catabolic process)	04621(NOD-like receptor signaling pathway)	K04612	NA	Transposon Ty3-I Gag-Pol polyprotein [Trichinella sp. T6]	0.28531	0.151755	0.081611	0.106168	0.048688	0.047433	2.56403	1.35842	0.0501822	0.895934	up	no
MSTRG.30084	Em0040g32a	Em0040g32a.t1	GO:0004252(serine-type endopeptidase activity);GO:0005044(scavenger receptor activity);GO:0005576(extracellular region);GO:0005886(plasma membrane);GO:0006508(proteolysis);GO:0006887(exocytosis);GO:0008233(peptidase activity);GO:0008236(serine-type peptidase activity);GO:0016020(membrane);GO:0016787(hydrolase activity);GO:0030424(axon);GO:0030425(dendrite);GO:0031410(cytoplasmic vesicle);GO:00316…	NA	NA	NA	SRCR domain, membrane form 2 [Geodia cydonium]	0.108157	0.240862	0.291429	1.36559	0.571243	0.233285	0.295121	-1.76062	0.0501831	0.895934	down	no
MSTRG.30425	Em0060g1a	Em0060g1a.t1	GO:0002540(leukotriene production involved in inflammatory response);GO:0004051(arachidonate 5-lipoxygenase activity);GO:0005506(iron ion binding);GO:0005615(extracellular space);GO:0005641(nuclear envelope lumen);GO:0005829(cytosol);GO:0016363(nuclear matrix);GO:0019370(leukotriene biosynthetic process);GO:0031965(nuclear membrane);GO:0055114(oxidation-reduction process)	00590(Arachidonic acid metabolism)	K00461	EC:1.13.11.34	PREDICTED: arachidonate 5-lipoxygenase-like [Amphimedon queenslandica]	0.299918	0	0.491011	0.039968	5.60331	0.099866	0.137717	-2.86022	0.0503292	0.896076	down	no
MSTRG.32072	Em0460g6a	Em0460g6a.t1	GO:0003824(catalytic activity);GO:0004721(phosphoprotein phosphatase activity);GO:0004722(protein serine/threonine phosphatase activity);GO:0006470(protein dephosphorylation);GO:0016787(hydrolase activity);GO:0030517(negative regulation of axon extension);GO:0031625(ubiquitin protein ligase binding);GO:0046872(metal ion binding);GO:0048786(presynaptic active zone);GO:0051965(positive regulation o…	NA	NA	NA	probable protein phosphatase 2C T23F11.1 [Pocillopora damicornis]	3.13728	2.6253	2.02307	1.55783	2.36479	1.5308	1.42766	0.513656	0.0503567	0.896076	up	no
MSTRG.17600	Em0012g787a	Em0012g787a.t1	NA	NA	NA	NA	PREDICTED: uncharacterized protein LOC109592057, partial [Amphimedon queenslandica]	7.49641	15.5044	8.61848	12.2268	13.4293	27.0146	0.600322	-0.736192	0.0503709	0.896076	down	no
MSTRG.32042	Em0450g1a;Em0450g2a	Em0450g1a.t1;Em0450g2a.t1	GO:0000139(Golgi membrane);GO:0001745(compound eye morphogenesis);GO:0002121(inter-male aggressive behavior);GO:0005086(ARF guanyl-nucleotide exchange factor activity);GO:0007417(central nervous system development);GO:0007520(myoblast fusion);GO:0030036(actin cytoskeleton organization);GO:0032014(positive regulation of ARF protein signal transduction);GO:0045296(cadherin binding)	04144(Endocytosis)	K12495	NA	PREDICTED: uncharacterized protein LOC105312754 [Amphimedon queenslandica]	1.52615	2.16312	3.51333	2.46659	0.256884	0.47574	2.25137	1.1708	0.0504516	0.896706	up	no
MSTRG.1021	Em0001g1189a	Em0001g1189a.t1	NA	NA	NA	NA		7.3923	5.93607	7.6965	4.89738	5.68729	4.19287	1.42276	0.50869	0.0505773	0.896749	up	no
MSTRG.20696	Em0015g1042a;Em0015g1040a	Em0015g1042a.t1;Em0015g1040a.t1	NA	NA	NA	NA		1.37889	1.3232	1.49822	2.04877	2.07133	2.51308	0.633226	-0.659209	0.0506159	0.896749	down	no
MSTRG.4082	Em0002g1272a	Em0002g1272a.t1	NA	NA	NA	NA		32.0218	28.6517	27.4626	25.1262	22.1005	24.2793	1.23257	0.30167	0.050675	0.896749	up	no
MSTRG.15981	Em0011g195a	Em0011g195a.t1	GO:0001736(establishment of planar polarity);GO:0001822(kidney development);GO:0003281(ventricular septum development);GO:0016021(integral component of membrane);GO:0021549(cerebellum development);GO:0035869(ciliary transition zone);GO:0042733(embryonic digit morphogenesis);GO:0060021(palate development);GO:0060976(coronary vasculature development);GO:1904491(protein localization to ciliary trans…	NA	NA	NA	PREDICTED: protein JBTS17-like [Branchiostoma belcheri]	2.09751	2.40178	2.77477	3.21017	3.42032	3.77179	0.699275	-0.516068	0.0507409	0.896749	down	no
MSTRG.7781	Em0004g1189a	Em0004g1189a.t1	GO:0000719(photoreactive repair);GO:0003904(deoxyribodipyrimidine photo-lyase activity)	NA	NA	NA	LReO_3 [Oryzias latipes]	0.397319	0.221074	0.204441	0.651491	0.468827	0.425916	0.532154	-0.910085	0.050752	0.896749	down	no
MSTRG.26526	Em0021g358a	Em0021g358a.t1	GO:0002244(hematopoietic progenitor cell differentiation);GO:0004725(protein tyrosine phosphatase activity);GO:0005886(plasma membrane);GO:0016021(integral component of membrane);GO:0032421(stereocilium bundle);GO:0035335(peptidyl-tyrosine dephosphorylation);GO:0042472(inner ear morphogenesis);GO:0045598(regulation of fat cell differentiation);GO:0050885(neuromuscular process controlling balance)…	NA	NA	NA	PREDICTED: LOW QUALITY PROTEIN: tenascin-X-like [Branchiostoma belcheri]	4.87352	4.88122	3.46183	6.57372	5.71741	6.70832	0.695629	-0.52361	0.0510584	0.898864	down	no
MSTRG.6509	Em0003g1694a;Em0003g1692a;Em0003g1685a;Em0003g1689a	Em0003g1694a.t1;Em0003g1692a.t1;Em0003g1685a.t1;Em0003g1689a.t1	GO:0007155(cell adhesion);GO:0007417(central nervous system development);GO:0016020(membrane);GO:0016021(integral component of membrane);GO:0005001(transmembrane receptor protein tyrosine phosphatase activity);GO:0005515(protein binding);GO:0005886(plasma membrane);GO:0005887(integral component of plasma membrane);GO:0007268(chemical synaptic transmission);GO:0021510(spinal cord development);GO:0…	04512(ECM-receptor interaction);04512(ECM-receptor interaction)	K06252	NA	PREDICTED: protein sidekick-1-like [Amphimedon queenslandica];PREDICTED: receptor-type tyrosine-protein phosphatase S-like, partial [Amphimedon queenslandica];Protein sidekick-2, partial [Trichoplax sp. H2]	2.36467	3.02417	2.20796	3.85132	3.42186	3.44291	0.708915	-0.496316	0.0511521	0.898864	down	no
MSTRG.19212	Em0014g603a	Em0014g603a.t1	GO:0008150(biological_process)	00920(Sulfur metabolism)	K17725	EC:1.13.11.18	PREDICTED: uncharacterized protein LOC100640187 [Amphimedon queenslandica]	11.1093	9.96609	8.647	8.67905	7.22881	7.76748	1.25542	0.328165	0.0511707	0.898864	up	no
MSTRG.3303	Em0001g3807a;Em0001g3804a;Em0001g3814a;Em0001g3801a;Em0001g3802a	Em0001g3807a.t1;Em0001g3804a.t1;Em0001g3814a.t1;Em0001g3801a.t1;Em0001g3802a.t1	GO:0004725(protein tyrosine phosphatase activity);GO:0006470(protein dephosphorylation);GO:0016020(membrane);GO:0016021(integral component of membrane);GO:0016311(dephosphorylation);GO:0016791(phosphatase activity);GO:0004888(transmembrane signaling receptor activity);GO:0004930(G-protein coupled receptor activity);GO:0007166(cell surface receptor signaling pathway);GO:0007186(G-protein coupled r…	NA	NA	NA	PREDICTED: uncharacterized protein LOC109582394 [Amphimedon queenslandica];PREDICTED: uncharacterized protein LOC100636215 [Amphimedon queenslandica];PREDICTED: hemicentin-1-like [Amphimedon queenslandica];PREDICTED: uncharacterized protein LOC109585994 isoform X2 [Amphimedon queenslandica]	1.65426	1.41549	1.3795	1.20097	1.09273	1.27851	1.24552	0.316749	0.0511822	0.898864	up	no
MSTRG.22027	Em0016g1107a	Em0016g1107a.t1	GO:0001654(eye development);GO:0004222(metalloendopeptidase activity);GO:0006508(proteolysis);GO:0008270(zinc ion binding);GO:0090331(negative regulation of platelet aggregation)	NA	NA	NA	PREDICTED: A disintegrin and metalloproteinase with thrombospondin motifs 18 [Xenopus tropicalis]	8.16999	6.62946	5.34074	10.6628	9.38293	8.96879	0.694142	-0.526697	0.0514139	0.901642	down	no
MSTRG.2788	Em0001g2932a	Em0001g2932a.t1	NA	NA	NA	NA		0.250207	0.784779	0.900217	0.425842	0.19668	0.371657	1.94654	0.960909	0.0514586	0.901642	up	no
MSTRG.11164	Em0007g250a	Em0007g250a.t1	GO:0000815(ESCRT III complex);GO:0003674(molecular_function);GO:0007034(vacuolar transport);GO:0007293(germarium-derived egg chamber formation);GO:0030713(ovarian follicle cell stalk formation);GO:0032509(endosome transport via multivesicular body sorting pathway);GO:0045807(positive regulation of endocytosis);GO:0046426(negative regulation of JAK-STAT cascade);GO:0050680(negative regulation of e…	04144(Endocytosis)	K12198	NA	charged multivesicular body protein 5-like [Stylophora pistillata]	10.9951	10.6549	10.2262	9.51212	7.09238	8.34074	1.27785	0.353718	0.0515413	0.902293	up	no
MSTRG.12900	Em0008g432a	Em0008g432a.t1	NA	NA	NA	NA		1.73156	2.57505	2.58718	2.66195	3.66951	5.67278	0.574279	-0.800176	0.0516025	0.902564	down	no
MSTRG.2283	Em0001g2789a	Em0001g2789a.t1	NA	NA	NA	NA	PREDICTED: putative ferric-chelate reductase 1 [Amphimedon queenslandica]	0.0616584	0.65697	0.33771	0.617651	5.68903	0	0.167495	-2.57781	0.0517413	0.904193	down	no
MSTRG.31137	Em0139g1a	Em0139g1a.t1	GO:0003674(molecular_function);GO:0005575(cellular_component);GO:0008150(biological_process)	NA	NA	NA	alkali-sensitive linkage protein 1-like [Lingula anatina]	0.376902	0.621256	0.349223	0.728344	0.901929	0.755614	0.56473	-0.824368	0.0517941	0.904316	down	no
MSTRG.22595	Em0017g569a	Em0017g569a.t1	NA	NA	NA	NA	PREDICTED: uncharacterized protein LOC109581930 [Amphimedon queenslandica]	0.746876	1.26062	0.846289	0.431859	0.504195	0.653401	1.79545	0.844343	0.0519265	0.905334	up	no
MSTRG.24983	Em0019g1137a	Em0019g1137a.t1	GO:2000785(regulation of autophagosome assembly)	NA	NA	NA	hypothetical protein LOTGIDRAFT_232560 [Lottia gigantea]	0.29207	0.279811	0.193039	0.380234	0.47848	0.798871	0.461467	-1.1157	0.051952	0.905334	down	no
MSTRG.10971	Em0006g1353a	Em0006g1353a.t1	NA	NA	NA	NA		1.01761	1.6172	0.19814	1.48119	2.6401	2.22653	0.446287	-1.16395	0.0519897	0.905334	down	no
MSTRG.8299	Em0005g86a	Em0005g86a.t1	GO:0003729(mRNA binding);GO:0005654(nucleoplasm);GO:0005886(plasma membrane);GO:0043231(intracellular membrane-bounded organelle)	NA	NA	NA	PREDICTED: kanadaptin-like [Amphimedon queenslandica]	2.49872	2.24205	1.61404	3.18239	3.61999	3.31488	0.628116	-0.670897	0.0520487	0.905565	down	no
MSTRG.15891	Em0011g47a	Em0011g47a.t1	GO:0016020(membrane);GO:0016021(integral component of membrane);GO:0016491(oxidoreductase activity);GO:0055114(oxidation-reduction process)	NA	NA	NA	PREDICTED: uncharacterized protein LOC100636115 isoform X1 [Amphimedon queenslandica]	0.928542	1.08134	0.931945	1.22028	1.89162	1.66422	0.615945	-0.699126	0.052135	0.90627	down	no
MSTRG.1192	Em0001g1398a	Em0001g1398a.t1	GO:0005737(cytoplasm);GO:0007283(spermatogenesis)	NA	NA	NA	hypothetical protein pdam_00001141, partial [Pocillopora damicornis]	2.03626	2.93175	2.55462	3.10075	4.03095	4.49161	0.647203	-0.627711	0.0522443	0.90735	down	no
MSTRG.429	Em0001g539a	Em0001g539a.t1	GO:0032259(methylation);GO:0046539(histamine N-methyltransferase activity)	NA	NA	NA	PREDICTED: uncharacterized protein LOC109584554 [Amphimedon queenslandica]	6.84113	6.16783	8.07455	5.16476	6.39095	4.64875	1.30109	0.379724	0.0523008	0.90735	up	no
MSTRG.95	Em0001g124a	Em0001g124a.t1	GO:0016021(integral component of membrane)	NA	NA	NA	sodium-dependent glucose transporter 1A [Lingula anatina]	5.1261	4.94297	5.39973	3.56349	3.66586	4.34265	1.33674	0.418722	0.0526378	0.909388	up	no
MSTRG.10331	Em0006g620a	Em0006g620a.t1	GO:0001056(RNA polymerase III activity);GO:0005666(DNA-directed RNA polymerase III complex)	00230(Purine metabolism);00240(Pyrimidine metabolism);03020(RNA polymerase)	K03021	EC:2.7.7.6	DNA-directed RNA polymerase III subunit RPC2-like, partial [Pocillopora damicornis]	2.95351	1.93534	2.07535	1.49126	1.67857	1.97057	1.3548	0.438078	0.0526487	0.909388	up	no
MSTRG.28143	Em0023g160a;Em0023g152a	Em0023g160a.t1;Em0023g152a.t1	GO:0003735(structural constituent of ribosome);GO:0005622(intracellular);GO:0005840(ribosome);GO:0006412(translation);GO:0022627(cytosolic small ribosomal subunit);GO:0022627(cytosolic small ribosomal subunit)	03010(Ribosome);03010(Ribosome)	K02951	NA	S12 [Suberites domuncula]	80.4934	66.5927	73.4642	91.414	92.321	121.395	0.722807	-0.468318	0.0526961	0.909388	down	no
MSTRG.5496	Em0003g843a;Em0003g844a;Em0003g847a	Em0003g843a.t1;Em0003g844a.t1;Em0003g847a.t1	GO:0003777(microtubule motor activity);GO:0005871(kinesin complex);GO:0007018(microtubule-based movement);GO:0016887(ATPase activity);GO:0016887(ATPase activity)	NA	NA	NA	carboxy-terminal kinesin 2-like [Pocillopora damicornis];Carboxy-terminal kinesin 2 [Stylophora pistillata];hypothetical protein C0Q70_05021 [Pomacea canaliculata]	1.52873	1.62984	1.79273	2.24866	2.44265	2.38579	0.699623	-0.51535	0.0528192	0.909388	down	no
Em0005g525a	Em0005g525a	Em0005g525a.t1	GO:0004842(ubiquitin-protein transferase activity);GO:0005737(cytoplasm);GO:0008270(zinc ion binding);GO:0016567(protein ubiquitination);GO:0016874(ligase activity);GO:0043523(regulation of neuron apoptotic process)	NA	NA	NA	hypothetical protein pdam_00009839 [Pocillopora damicornis]	1.21319	0.971937	1.08697	0.634809	0.562965	0.768507	1.6641	0.734744	0.0529336	0.909388	up	no
MSTRG.28432	Em0023g344a	Em0023g344a.t1	GO:0004715(non-membrane spanning protein tyrosine kinase activity);GO:0005102(receptor binding);GO:0007169(transmembrane receptor protein tyrosine kinase signaling pathway);GO:0030154(cell differentiation);GO:0031234(extrinsic component of cytoplasmic side of plasma membrane);GO:0038083(peptidyl-tyrosine autophosphorylation);GO:0042127(regulation of cell proliferation);GO:0045087(innate immune re…	NA	NA	NA	protein tyrosine kinase [Ephydatia fluviatilis]	0.612957	0.501956	0.760056	1.32714	1.0221	1.3535	0.506374	-0.981726	0.0530006	0.909388	down	no
MSTRG.11256	Em0007g264a	Em0007g264a.t1	NA	NA	NA	NA		4.07517	3.62648	2.55413	5.7781	5.06312	5.75524	0.617949	-0.694439	0.0530874	0.909388	down	no
MSTRG.27277	Em0022g137a	Em0022g137a.t1	GO:0003777(microtubule motor activity);GO:0005524(ATP binding);GO:0005737(cytoplasm);GO:0005874(microtubule);GO:0005929(cilium);GO:0007018(microtubule-based movement);GO:0030286(dynein complex)	NA	NA	NA	hypothetical protein CAPTEDRAFT_211125, partial [Capitella teleta]	0.505899	0.866803	1.12639	1.28945	1.46945	1.40925	0.59957	-0.737999	0.0530946	0.909388	down	no
MSTRG.27832	Em0022g708a	Em0022g708a.t1	GO:0005813(centrosome);GO:0007098(centrosome cycle);GO:0034454(microtubule anchoring at centrosome);GO:0060271(cilium assembly);GO:0071539(protein localization to centrosome)	NA	NA	NA	LOW QUALITY PROTEIN: pericentriolar material 1 protein [Labrus bergylta]	3.99348	5.71871	4.59396	6.16371	6.763	7.62906	0.695968	-0.522908	0.05315	0.909388	down	no
MSTRG.30969	Em0114g7a	Em0114g7a.t1	NA	NA	NA	NA	PREDICTED: uncharacterized protein LOC109039632 [Bemisia tabaci]	0.19222	0	0	0.474494	0.195885	0.312972	0.195474	-2.35495	0.0532134	0.909388	down	no
MSTRG.6632	Em0003g1870a;Em0003g1838a	Em0003g1870a.t1;Em0003g1838a.t1	NA	NA	NA	NA	hypothetical protein AC249_AIPGENE10056 [Exaiptasia pallida]	560.777	628.071	512.777	459.83	489.413	425.524	1.23775	0.307726	0.0533124	0.909388	up	no
MSTRG.28631	Em0023g609a	Em0023g609a.t1	GO:0005768(endosome);GO:0005886(plasma membrane);GO:0006904(vesicle docking involved in exocytosis);GO:0009306(protein secretion);GO:0072659(protein localization to plasma membrane)	04144(Endocytosis);04530(Tight junction)	K07901	NA	PREDICTED: ras-related protein Rab-13-like [Amphimedon queenslandica]	3.54275	4.52735	3.48474	2.94336	2.7276	2.38944	1.43353	0.519574	0.0533964	0.909388	up	no
MSTRG.1677	Em0001g1984a	Em0001g1984a.t1	NA	NA	NA	NA		3.65128	3.2865	2.88889	4.49364	4.93376	4.45398	0.707902	-0.498378	0.0534998	0.909388	down	no
Em0024g109a	Em0024g109a	Em0024g109a.t1	GO:0004674(protein serine/threonine kinase activity);GO:0005634(nucleus);GO:0005737(cytoplasm);GO:0008360(regulation of cell shape);GO:0018105(peptidyl-serine phosphorylation)	NA	NA	NA	Retrovirus-related Pol polyprotein from transposon 17.6 [Exaiptasia pallida]	0.276316	0.33586	0.241731	0.153134	0.177455	0.177455	1.68077	0.749126	0.0536439	0.909388	up	no
MSTRG.10339	Em0006g632a	Em0006g632a.t1	GO:0005385(zinc ion transmembrane transporter activity);GO:0005887(integral component of plasma membrane);GO:0006882(cellular zinc ion homeostasis);GO:0071578(zinc II ion transmembrane import)	NA	NA	NA	PREDICTED: zinc transporter ZIP4-like [Amphimedon queenslandica]	4.47717	3.70106	3.57812	3.06892	2.963	3.20026	1.27341	0.348697	0.0537346	0.909388	up	no
MSTRG.18450	Em0013g715a	Em0013g715a.t1	GO:0003777(microtubule motor activity);GO:0005871(kinesin complex);GO:0007018(microtubule-based movement);GO:0016887(ATPase activity);GO:0030705(cytoskeleton-dependent intracellular transport)	NA	NA	NA	PREDICTED: kinesin-II 95 kDa subunit-like [Hydra vulgaris]	3.43974	3.00899	2.93638	4.09879	4.80782	4.51396	0.699308	-0.516	0.0537542	0.909388	down	no
MSTRG.21953	Em0016g1033a	Em0016g1033a.t1	GO:0003674(molecular_function);GO:0005575(cellular_component);GO:0005794(Golgi apparatus);GO:0008150(biological_process);GO:0015020(glucuronosyltransferase activity);GO:0016757(transferase activity, transferring glycosyl groups);GO:0030145(manganese ion binding);GO:0035269(protein O-linked mannosylation);GO:0042285(xylosyltransferase activity);GO:0043231(intracellular membrane-bounded organelle);…	00515(Mannose type O-glycan biosyntheis)	K09668	EC:2.4.2.-;EC:2.4.1.-	PREDICTED: glycosyltransferase-like protein LARGE1 [Latimeria chalumnae]	0.150137	0.202159	0.091359	0.34739	0.29008	0.562598	0.369692	-1.43561	0.0537783	0.909388	down	no
MSTRG.100	Em0001g202a	Em0001g202a.t1	GO:0005737(cytoplasm);GO:0005813(centrosome);GO:0005911(cell-cell junction);GO:0030317(flagellated sperm motility);GO:0032391(photoreceptor connecting cilium);GO:0035845(photoreceptor cell outer segment organization);GO:0035869(ciliary transition zone);GO:0045494(photoreceptor cell maintenance);GO:0060041(retina development in camera-type eye);GO:0090090(negative regulation of canonical Wnt signa…	NA	NA	NA	PREDICTED: nephrocystin-4 isoform X2 [Lepisosteus oculatus]	1.08185	1.26414	1.36643	1.77043	1.7563	2.33837	0.632966	-0.659799	0.0538014	0.909388	down	no
MSTRG.18773	Em0013g1071a	Em0013g1071a.t1	GO:0000242(pericentriolar material);GO:0000922(spindle pole);GO:0003674(molecular_function);GO:0005737(cytoplasm);GO:0005813(centrosome);GO:0005814(centriole);GO:0036064(ciliary basal body);GO:0071539(protein localization to centrosome)	NA	NA	NA	PREDICTED: protein NEDD1-like [Amphimedon queenslandica]	0.769565	1.30002	1.21368	1.62179	2.04438	2.14532	0.564962	-0.823775	0.0538262	0.909388	down	no
MSTRG.26372	Em0021g220a	Em0021g220a.t1	GO:0006464(cellular protein modification process)	NA	NA	NA	PREDICTED: tubulin--tyrosine ligase-like protein 12 [Amphimedon queenslandica]	5.28298	3.63599	4.01341	3.16099	3.22618	3.26751	1.33949	0.421687	0.0540168	0.909388	up	no
MSTRG.12382	Em0007g1353a;Em0007g1393a	Em0007g1353a.t1;Em0007g1393a.t1	NA	NA	NA	NA		25.0438	28.4753	31.5383	38.3313	36.3959	44.5029	0.713388	-0.487241	0.0540314	0.909388	down	no
MSTRG.28988	Em0023g949a	Em0023g949a.t1	GO:0003700(DNA binding transcription factor activity);GO:0005634(nucleus);GO:0006355(regulation of transcription, DNA-templated);GO:0008270(zinc ion binding)	03040(Spliceosome)	K12874	NA	PREDICTED: NFX1-type zinc finger-containing protein 1-like [Amphimedon queenslandica]	9.65645	9.70337	8.47585	12.0356	11.7551	14.2269	0.732177	-0.449736	0.0541363	0.909388	down	no
MSTRG.30593	Em0073g1a	Em0073g1a.t1	GO:0004536(deoxyribonuclease activity);GO:0006308(DNA catabolic process)	04621(NOD-like receptor signaling pathway)	K04612	NA	Retrovirus-related Pol polyprotein from transposon 412, partial [Stegodyphus mimosarum]	3.96611	0.327287	5.31405	0.222706	1.78668	1.66584	2.61411	1.38632	0.0541569	0.909388	up	no
MSTRG.22500	Em0017g452a	Em0017g452a.t1	GO:0016021(integral component of membrane);GO:0055085(transmembrane transport)	NA	NA	NA	PREDICTED: protein ZINC INDUCED FACILITATOR-LIKE 1-like [Amphimedon queenslandica]	1.90426	1.56017	1.36547	2.28442	2.92111	2.76468	0.605995	-0.722621	0.0542018	0.909388	down	no
MSTRG.30705	Em0083g6a	Em0083g6a.t1	NA	NA	NA	NA		1.73021	1.42911	1.14826	2.40307	2.13869	2.6433	0.599518	-0.738124	0.0542324	0.909388	down	no
MSTRG.26603	Em0021g487a	Em0021g487a.t1	NA	04310(Wnt signaling pathway);04068(FoxO signaling pathway)	K10151	NA	G1/S-specific cyclin D [Ephydatia muelleri]	54.9635	49.0017	56.0627	83.6666	65.1923	72.6067	0.722586	-0.46876	0.0542388	0.909388	down	no
MSTRG.192	Em0001g243a	Em0001g243a.t1	NA	NA	NA	NA		3.44087	2.867	4.41048	2.25379	2.04427	1.79429	1.75931	0.815013	0.0543164	0.909388	up	no
MSTRG.24334	Em0019g351a	Em0019g351a.t1	GO:0005741(mitochondrial outer membrane);GO:0007283(spermatogenesis);GO:0009922(fatty acid elongase activity);GO:0019367(fatty acid elongation, saturated fatty acid);GO:0030148(sphingolipid biosynthetic process);GO:0030176(integral component of endoplasmic reticulum membrane);GO:0030497(fatty acid elongation);GO:0034625(fatty acid elongation, monounsaturated fatty acid);GO:0034626(fatty acid elon…	00062(Fatty acid elongation);01040(Biosynthesis of unsaturated fatty acids)	K10203	EC:2.3.1.199	putative fatty acid elongation protein 3 [Orchesella cincta]	6.66017	8.90441	4.72392	4.90668	3.37854	5.11149	1.51444	0.598784	0.0543285	0.909388	up	no
Em0020g865a	Em0020g865a	Em0020g865a.t1	NA	NA	NA	NA	PREDICTED: meiosis inhibitor protein 1-like [Amphimedon queenslandica]	0.2117	0.067863	0.104334	0.296799	0.328706	0.395737	0.375912	-1.41153	0.0544019	0.909388	down	no
MSTRG.25908	Em0020g848a	Em0020g848a.t1	GO:0008210(estrogen metabolic process);GO:0045600(positive regulation of fat cell differentiation);GO:0047894(flavonol 3-sulfotransferase activity);GO:0050294(steroid sulfotransferase activity);GO:0051923(sulfation)	00140(Steroid hormone biosynthesis)	K01016	EC:2.8.2.4	Sulfotransferase 1 family member D1, partial [Colius striatus]	1.48107	2.73696	2.87192	3.50744	3.69009	5.07625	0.577649	-0.791734	0.0544893	0.909388	down	no
MSTRG.14034	Em0009g400a	Em0009g400a.t1	GO:0003777(microtubule motor activity);GO:0005871(kinesin complex);GO:0007018(microtubule-based movement);GO:0016887(ATPase activity)	NA	NA	NA	Centromere-associated protein E [Trichoplax sp. H2]	4.29991	5.35028	5.85667	6.66952	8.04384	7.33849	0.7032	-0.507993	0.0544893	0.909388	down	no
MSTRG.20854	Em0015g1192a	Em0015g1192a.t1	NA	NA	NA	NA		116.274	96.5194	75.4503	76.959	76.922	77.3832	1.24638	0.317746	0.0545508	0.909388	up	no
MSTRG.16746	Em0012g47a;Em0012g48a	Em0012g47a.t1;Em0012g48a.t1	GO:0005178(integrin binding);GO:0005509(calcium ion binding);GO:0005544(calcium-dependent phospholipid binding);GO:0005635(nuclear envelope);GO:0005789(endoplasmic reticulum membrane);GO:0005829(cytosol);GO:0005886(plasma membrane);GO:0006874(cellular calcium ion homeostasis);GO:0006914(autophagy);GO:0007599(hemostasis);GO:0008283(cell proliferation);GO:0008360(regulation of cell shape);GO:000965…	NA	NA	NA	PREDICTED: annexin A7-like [Amphimedon queenslandica];annexin [Ephydatia fluviatilis]	3.02826	2.43844	1.91279	1.11264	1.74957	2.15187	1.47175	0.557535	0.0547197	0.9104	up	no
MSTRG.459	Em0001g554a	Em0001g554a.t1	GO:0000226(microtubule cytoskeleton organization);GO:0000922(spindle pole);GO:0000923(equatorial microtubule organizing center);GO:0000930(gamma-tubulin complex);GO:0005200(structural constituent of cytoskeleton);GO:0005654(nucleoplasm);GO:0005737(cytoplasm);GO:0005813(centrosome);GO:0005815(microtubule organizing center);GO:0005816(spindle pole body);GO:0005856(cytoskeleton);GO:0005874(microtubu…	NA	NA	NA	gamma-tubulin complex component 2-like [Pocillopora damicornis]	1.01876	0.93914	1.09131	1.71629	1.57834	1.78524	0.600254	-0.736356	0.05484	0.911201	down	no
MSTRG.32711	Em0897g2a	Em0897g2a.t1	GO:0007035(vacuolar acidification);GO:0015986(ATP synthesis coupled proton transport);GO:0016471(vacuolar proton-transporting V-type ATPase complex);GO:0046961(proton-transporting ATPase activity, rotational mechanism);GO:0051117(ATPase binding);GO:0070072(vacuolar proton-transporting V-type ATPase complex assembly)	00190(Oxidative phosphorylation);04145(Phagosome);04142(Lysosome)	K02154	NA	PREDICTED: V-type proton ATPase 116 kDa subunit a-like isoform X1 [Amphimedon queenslandica]	1.54305	1.89904	2.35696	1.27468	0.537607	0	3.19986	1.67801	0.0548667	0.911201	up	no
MSTRG.13922	Em0009g303a	Em0009g303a.t1	GO:0000788(nuclear nucleosome);GO:0003677(DNA binding);GO:0006334(nucleosome assembly)	NA	NA	NA	PREDICTED: late histone H2B.L4-like [Amphimedon queenslandica]	0.892741	1.18911	0.711491	2.10126	1.82473	3.08841	0.398229	-1.32833	0.0549717	0.911201	down	no
MSTRG.4389	Em0002g1382a	Em0002g1382a.t1	NA	NA	NA	NA		1.14408	0.931199	0.975439	0.486319	0.513598	0.760483	1.73297	0.793246	0.0550391	0.911201	up	no
MSTRG.20325	Em0015g548a	Em0015g548a.t1	GO:0003824(catalytic activity);GO:0019290(siderophore biosynthetic process)	NA	NA	NA	lgrC, partial [Nephila clavipes]	2.76931	2.78422	3.25751	3.80151	4.28299	4.51976	0.699053	-0.516527	0.0551005	0.911201	down	no
MSTRG.10933	Em0006g1263a	Em0006g1263a.t1	NA	NA	NA	NA	PREDICTED: solute carrier family 15 member 4-like [Amphimedon queenslandica]	0.766097	0.821291	0.871154	1.41472	1.41133	1.3329	0.591146	-0.758413	0.0551335	0.911201	down	no
MSTRG.8995	Em0005g785a	Em0005g785a.t1	NA	NA	NA	NA		2.11682	1.43766	0.888312	0.695778	1.02878	0.613112	1.90053	0.926399	0.0551461	0.911201	up	no
MSTRG.26226	Em0021g52a;Em0021g51a	Em0021g52a.t1;Em0021g51a.t1	GO:0007286(spermatid development);GO:0070062(extracellular exosome)	NA	NA	NA	PREDICTED: uncharacterized protein LOC105315319 [Amphimedon queenslandica];PREDICTED: IQ domain-containing protein G-like [Branchiostoma belcheri]	4.59902	3.24282	3.33792	5.29821	4.76666	5.99365	0.696189	-0.52245	0.0551995	0.911201	down	no
MSTRG.26485	Em0021g342a	Em0021g342a.t1	GO:0000902(cell morphogenesis);GO:0001816(cytokine production);GO:0004771(sterol esterase activity);GO:0006954(inflammatory response);GO:0008283(cell proliferation);GO:0016042(lipid catabolic process);GO:0030324(lung development);GO:0048771(tissue remodeling);GO:0048873(homeostasis of number of cells within a tissue);GO:0070062(extracellular exosome)	00100(Steroid biosynthesis);04142(Lysosome)	K01052	EC:3.1.1.13	PREDICTED: gastric triacylglycerol lipase-like [Amphimedon queenslandica]	28.0456	22.6467	15.6479	17.9961	16.6624	16.3295	1.30109	0.379723	0.0553232	0.911812	up	no
MSTRG.26843	Em0021g693a	Em0021g693a.t1	GO:0007186(G-protein coupled receptor signaling pathway);GO:0016021(integral component of membrane);GO:0019236(response to pheromone);GO:0070062(extracellular exosome)	00523(Polyketide sugar unit biosynthesis);01055(Biosynthesis of vancomycin group antibiotics);00525(Acarbose and validamycin biosynthesis)	K01710	EC:4.2.1.46	PREDICTED: integral membrane protein GPR180-like [Amphimedon queenslandica]	1.7666	1.44473	1.21787	1.07966	0.725291	0.756684	1.72905	0.78998	0.0553577	0.911812	up	no
MSTRG.22895	Em0018g56a	Em0018g56a.t1	GO:0005575(cellular_component);GO:0016491(oxidoreductase activity);GO:0055114(oxidation-reduction process)	00330(Arginine and proline metabolism);00410(beta-Alanine metabolism)	K13366	EC:1.5.3.14;EC:1.5.3.16	PREDICTED: polyamine oxidase-like [Branchiostoma belcheri]	39.2916	35.283	47.5038	34.7839	31.0149	32.7383	1.23891	0.309069	0.0554463	0.912511	up	no
MSTRG.31855	Em0363g2a	Em0363g2a.t1	NA	NA	NA	NA	PREDICTED: uncharacterized protein LOC100632089 [Amphimedon queenslandica]	11.3963	10.7119	10.5371	9.61787	4.61482	10.4114	1.32467	0.405637	0.0555375	0.91284	up	no
MSTRG.26215	Em0021g63a	Em0021g63a.t1	GO:0005737(cytoplasm);GO:0044828(negative regulation by host of viral genome replication);GO:0045893(positive regulation of transcription, DNA-templated)	NA	NA	NA	PL10 protein [Ephydatia muelleri]	11.5109	15.069	16.8124	10.8028	4.90235	14.9535	1.41533	0.50114	0.0555702	0.91284	up	no
MSTRG.17411	Em0012g660a	Em0012g660a.t1	GO:0005739(mitochondrion);GO:0006400(tRNA modification);GO:0052381(tRNA dimethylallyltransferase activity)	NA	NA	NA	PREDICTED: uncharacterized protein LOC109581930 [Amphimedon queenslandica]	0.103326	0.136064	0.0774361	0.20684	0.337573	0.28403	0.382436	-1.38671	0.0558087	0.913913	down	no
MSTRG.17228	Em0012g658a	Em0012g658a.t1	GO:0004536(deoxyribonuclease activity);GO:0006308(DNA catabolic process)	04010(MAPK signaling pathway);04510(Focal adhesion)	K05096	EC:2.7.10.1	uncharacterized protein LOC113067092 [Carassius auratus]	0.786068	1.27542	1.15901	0.309497	0.812868	0.774281	1.698	0.763835	0.055981	0.914228	up	no
MSTRG.11847	Em0007g981a	Em0007g981a.t1	GO:0004360(glutamine-fructose-6-phosphate transaminase (isomerizing) activity);GO:0006002(fructose 6-phosphate metabolic process);GO:0006047(UDP-N-acetylglucosamine metabolic process)	00520(Amino sugar and nucleotide sugar metabolism);00250(Alanine, aspartate and glutamate metabolism)	K00820	EC:2.6.1.16	PREDICTED: glutamine--fructose-6-phosphate aminotransferase [isomerizing] 1-like [Amphimedon queenslandica]	6.72888	5.01221	6.64865	4.30976	4.56684	5.67814	1.26349	0.33741	0.0560715	0.914228	up	no
MSTRG.24804	Em0019g922a	Em0019g922a.t1	GO:0005887(integral component of plasma membrane);GO:0009992(cellular water homeostasis);GO:0015250(water channel activity);GO:0015254(glycerol channel activity);GO:0034220(ion transmembrane transport)	NA	NA	NA	PREDICTED: uncharacterized protein LOC105312704 [Amphimedon queenslandica]	10.6246	6.24666	7.70705	12.5016	11.2737	12.3973	0.679471	-0.557516	0.056077	0.914228	down	no
Em0045g36a	Em0045g36a	Em0045g36a.t1	GO:0003677(DNA binding);GO:0005622(intracellular);GO:0005634(nucleus);GO:0006351(transcription, DNA-templated);GO:0006355(regulation of transcription, DNA-templated);GO:0008270(zinc ion binding);GO:0016567(protein ubiquitination);GO:0016740(transferase activity);GO:0030218(erythrocyte differentiation);GO:0033333(fin development);GO:0034243(regulation of transcription elongation from RNA polymeras…	NA	NA	NA	PREDICTED: E3 ubiquitin-protein ligase TRIM71-like [Amphimedon queenslandica]	0.165863	0.295353	0.092475	0.797859	0.287972	0.394108	0.374131	-1.41838	0.0561109	0.914228	down	no
MSTRG.5506	Em0003g903a;Em0003g895a	Em0003g903a.t1;Em0003g895a.t1	NA	NA	NA	NA	PREDICTED: cell death-inducing p53-target protein 1 homolog isoform X1 [Amphimedon queenslandica];PREDICTED: putative transmembrane protein DDB_G0267530 [Amphimedon queenslandica]	0.494988	0.195679	0.201262	0.714782	0.6221	0.564255	0.469155	-1.09186	0.056365	0.916823	down	no
MSTRG.13202	Em0008g741a;Em0008g739a;Em0008g709a;Em0008g710a	Em0008g741a.t1;Em0008g739a.t1;Em0008g709a.t1;Em0008g710a.t1	GO:0002224(toll-like receptor signaling pathway);GO:0004842(ubiquitin-protein transferase activity);GO:0005164(tumor necrosis factor receptor binding);GO:0008063(Toll signaling pathway);GO:0008270(zinc ion binding);GO:0009898(cytoplasmic side of plasma membrane);GO:0016567(protein ubiquitination);GO:0019901(protein kinase binding);GO:0019903(protein phosphatase binding);GO:0030162(regulation of p…	04620(Toll-like receptor signaling pathway);04621(NOD-like receptor signaling pathway);04622(RIG-I-like receptor signaling pathway);05168(Herpes simplex infection);05168(Herpes simplex infection)	K03174	NA	PREDICTED: TNF receptor-associated factor 3-like [Amphimedon queenslandica];hypothetical protein AC249_AIPGENE7033 [Exaiptasia pallida]	2.25283	1.18283	2.08096	1.85919	1.04155	0.768264	1.50357	0.588396	0.0564035	0.916823	up	no
MSTRG.11545	Em0007g616a	Em0007g616a.t1	GO:0004497(monooxygenase activity);GO:0005506(iron ion binding);GO:0016020(membrane);GO:0016021(integral component of membrane);GO:0016491(oxidoreductase activity);GO:0016705(oxidoreductase activity, acting on paired donors, with incorporation or reduction of molecular oxygen);GO:0020037(heme binding);GO:0046872(metal ion binding);GO:0055114(oxidation-reduction process)	NA	NA	NA	cytochrome P450 4B1-like [Kryptolebias marmoratus]	1.7827	1.81527	1.61714	1.24614	1.2363	0.791261	1.59303	0.671777	0.0565277	0.916847	up	no
MSTRG.21739	Em0016g887a	Em0016g887a.t1	NA	NA	NA	NA	PREDICTED: uncharacterized protein LOC109582058 isoform X2 [Amphimedon queenslandica]	2.15572	1.88762	1.79845	0.976182	1.08298	1.48412	1.64869	0.721321	0.0565496	0.916847	up	no
MSTRG.27928	Em0022g774a	Em0022g774a.t1	GO:0000165(MAPK cascade);GO:0000186(activation of MAPKK activity);GO:0000187(activation of MAPK activity);GO:0001933(negative regulation of protein phosphorylation);GO:0003779(actin binding);GO:0003924(GTPase activity);GO:0004708(MAP kinase kinase activity);GO:0005096(GTPase activator activity);GO:0005524(ATP binding);GO:0005525(GTP binding);GO:0005615(extracellular space);GO:0005743(mitochondria…	NA	NA	NA	PREDICTED: leucine-rich repeat serine/threonine-protein kinase 2-like, partial [Amphimedon queenslandica]	0.553691	0.479689	0.841048	0.109493	0.420439	0.424688	1.96353	0.973452	0.0566439	0.916847	up	no
MSTRG.22907	Em0018g70a	Em0018g70a.t1	GO:0000922(spindle pole);GO:0005634(nucleus);GO:0005813(centrosome);GO:0005886(plasma membrane);GO:0007026(negative regulation of microtubule depolymerization);GO:0008352(katanin complex);GO:0008568(microtubule-severing ATPase activity);GO:0030424(axon);GO:0031117(positive regulation of microtubule depolymerization);GO:0046982(protein heterodimerization activity)	NA	NA	NA	PREDICTED: katanin p80 WD40 repeat-containing subunit B1-like [Amphimedon queenslandica]	6.30955	6.69279	7.24982	8.07828	10.4026	10.8955	0.689403	-0.536581	0.056882	0.919314	down	no
MSTRG.30477	Em0064g11a	Em0064g11a.t1	NA	NA	NA	NA		4.47686	6.5191	5.60895	4.08618	3.57221	4.09204	1.41313	0.498897	0.0571494	0.921935	up	no
MSTRG.22551	Em0017g548a	Em0017g548a.t1	NA	NA	NA	NA		2.99235	4.25863	3.79067	5.19722	6.47598	5.80508	0.631735	-0.662608	0.0572141	0.921935	down	no
MSTRG.13842	Em0009g178a	Em0009g178a.t1	GO:0000712(resolution of meiotic recombination intermediates);GO:0003697(single-stranded DNA binding);GO:0008310(single-stranded DNA 3'-5' exodeoxyribonuclease activity);GO:0090305(nucleic acid phosphodiester bond hydrolysis)	NA	NA	NA	PREDICTED: uncharacterized protein LOC105315219 [Amphimedon queenslandica]	0.437832	0.410028	0.594243	0.161388	0.236117	0.312034	2.03245	1.02322	0.057233	0.921935	up	no
MSTRG.27222	Em0022g86a;Em0022g87a	Em0022g86a.t1;Em0022g87a.t1	GO:0005764(lysosome);GO:0005775(vacuolar lumen);GO:0007040(lysosome organization);GO:0007601(visual perception);GO:0022008(neurogenesis);GO:0004749(ribose phosphate diphosphokinase activity);GO:0005524(ATP binding);GO:0005737(cytoplasm);GO:0005829(cytosol);GO:0005886(plasma membrane);GO:0009116(nucleoside metabolic process);GO:0009165(nucleotide biosynthetic process);GO:0009506(plasmodesma);GO:00…	04142(Lysosome);00030(Pentose phosphate pathway);00230(Purine metabolism)	K12390;K00948	EC:2.7.6.1	hypothetical protein BRAFLDRAFT_220284 [Branchiostoma floridae];PREDICTED: ribose-phosphate pyrophosphokinase 4-like [Amphimedon queenslandica]	26.0384	21.9422	22.2134	18.0682	18.5687	21.2256	1.21312	0.27872	0.0573791	0.921935	up	no
MSTRG.32150	Em0508g8a	Em0508g8a.t1	GO:0005737(cytoplasm);GO:0031625(ubiquitin protein ligase binding);GO:0061630(ubiquitin protein ligase activity)	NA	NA	NA	PREDICTED: transmembrane protein 189-like [Amphimedon queenslandica]	8.89119	9.07541	8.26883	6.4905	5.7803	7.23923	1.34471	0.4273	0.0573981	0.921935	up	no
MSTRG.32804	Em1043g1a	Em1043g1a.t1	GO:0005769(early endosome);GO:0015031(protein transport)	NA	NA	NA	coiled-coil domain-containing protein 93-like [Lingula anatina]	1.55344	0.420165	1.1718	1.73439	1.67336	2.58334	0.525015	-0.92957	0.0574318	0.921935	down	no
MSTRG.17595	Em0012g781a;Em0012g775a	Em0012g781a.t1;Em0012g775a.t1	GO:0000407(phagophore assembly site);GO:0005776(autophagosome);GO:0016236(macroautophagy);GO:0043130(ubiquitin binding)	04137(Mitophagy - animal);04137(Mitophagy - animal)	K17987	NA	uncharacterized protein LOC111101945 [Crassostrea virginica];PREDICTED: next to BRCA1 gene 1 protein-like [Amphimedon queenslandica]	10.3399	10.5466	12.2033	9.23996	8.91624	8.14092	1.2583	0.33148	0.057453	0.921935	up	no
MSTRG.18650	Em0013g858a	Em0013g858a.t1	GO:0005007(fibroblast growth factor-activated receptor activity);GO:0005524(ATP binding);GO:0005654(nucleoplasm);GO:0005887(integral component of plasma membrane);GO:0005938(cell cortex);GO:0008284(positive regulation of cell proliferation);GO:0008543(fibroblast growth factor receptor signaling pathway);GO:0009986(cell surface);GO:0010518(positive regulation of phospholipase activity);GO:0017134(…	04144(Endocytosis)	K05093	EC:2.7.10.1	PREDICTED: tyrosine kinase receptor Cad96Ca-like [Amphimedon queenslandica]	8.3035	8.6948	7.70694	10.9148	12.3854	10.9567	0.721173	-0.471582	0.0574636	0.921935	down	no
MSTRG.19791	Em0015g104a	Em0015g104a.t1	GO:0005524(ATP binding);GO:0005829(cytosol);GO:0006631(fatty acid metabolic process);GO:0030729(acetoacetate-CoA ligase activity)	00650(Butanoate metabolism);00280(Valine, leucine and isoleucine degradation)	K01907	EC:6.2.1.16	acetoacetyl-CoA synthetase-like [Exaiptasia pallida]	2.59795	3.94299	1.76553	1.60831	2.18261	1.47551	1.57725	0.657408	0.0579313	0.927781	up	no
MSTRG.14752	Em0009g1117a	Em0009g1117a.t1	GO:0005509(calcium ion binding);GO:0005615(extracellular space);GO:0005623(cell);GO:0008201(heparin binding);GO:0008285(negative regulation of cell proliferation);GO:0009887(animal organ morphogenesis);GO:0010629(negative regulation of gene expression);GO:0030308(negative regulation of cell growth);GO:0032870(cellular response to hormone stimulus);GO:0035385(Roundabout signaling pathway);GO:00484…	04151(PI3K-Akt signaling pathway);04512(ECM-receptor interaction);04510(Focal adhesion);05200(Pathways in cancer);05222(Small cell lung cancer);05165(Human papillomavirus infection);05146(Amoebiasis);05145(Toxoplasmosis)	K05637	NA	PREDICTED: laminin subunit alpha-1, partial [Manis javanica]	9.38991	10.7978	11.5791	13.5572	16.6592	16.0546	0.686538	-0.542589	0.0579751	0.927781	down	no
MSTRG.22623	Em0017g595a	Em0017g595a.t1	GO:0001578(microtubule bundle formation);GO:0003353(positive regulation of cilium movement);GO:0015631(tubulin binding);GO:0018095(protein polyglutamylation);GO:0036064(ciliary basal body);GO:0051013(microtubule severing);GO:0070739(protein-glutamic acid ligase activity)	NA	NA	NA	PREDICTED: uncharacterized protein LOC109581122 [Amphimedon queenslandica]	1.59715	1.30795	1.9433	2.91159	2.4816	2.58552	0.607668	-0.718644	0.0580549	0.927781	down	no
MSTRG.5425	Em0003g669a	Em0003g669a.t1	GO:0005415(nucleoside:sodium symporter activity);GO:0005887(integral component of plasma membrane)	04621(NOD-like receptor signaling pathway)	K04612	NA	Retrovirus-related Pol polyprotein from transposon [Trichinella nativa]	0.253769	0.245791	0.251446	0.578156	0.66129	0.484951	0.435518	-1.1992	0.0581495	0.92813	down	no
MSTRG.11325	Em0007g387a	Em0007g387a.t1	NA	NA	NA	NA	PREDICTED: usherin [Strongylocentrotus purpuratus]	0.520517	0.426422	0.193391	0.0985638	0.111629	0.235594	2.55802	1.35503	0.0581782	0.92813	up	no
MSTRG.32645	Em0831g4a	Em0831g4a.t1	GO:0000166(nucleotide binding);GO:0002177(manchette);GO:0003341(cilium movement);GO:0003774(motor activity);GO:0003777(microtubule motor activity);GO:0005515(protein binding);GO:0005524(ATP binding);GO:0005635(nuclear envelope);GO:0005737(cytoplasm);GO:0005813(centrosome);GO:0005856(cytoskeleton);GO:0005868(cytoplasmic dynein complex);GO:0005874(microtubule);GO:0007018(microtubule-based movement)…	04145(Phagosome)	K10413	NA	LOW QUALITY PROTEIN: cytoplasmic dynein 1 heavy chain 1-like [Orbicella faveolata]	16.6949	2.08356	0.931334	0	1.79906	2.33587	4.76667	2.25298	0.0583117	0.929259	up	no
MSTRG.10791	Em0006g1213a	Em0006g1213a.t1	NA	NA	NA	NA		0.658198	0.371604	0.179802	0.984063	1.3348	0.385448	0.447287	-1.16073	0.0583994	0.929411	down	no
Em0012g264a	Em0012g264a	Em0012g264a.t1	NA	NA	NA	NA		0.122524	0.17041	0.261659	0.422847	0.487277	0.67077	0.35081	-1.51124	0.0584527	0.929511	down	no
MSTRG.11195	Em0007g193a;Em0007g144a;Em0007g151a;Em0007g192a	Em0007g193a.t1;Em0007g144a.t1;Em0007g151a.t1;Em0007g192a.t1	GO:0000790(nuclear chromatin);GO:0003677(DNA binding);GO:0006342(chromatin silencing);GO:0006342(chromatin silencing)	NA	NA	NA	histone H2A-like [Acanthaster planci];uncharacterized protein LOC113815377 [Penaeus vannamei]	10.7973	18.3636	24.6742	17.8124	34.4582	36.978	0.603203	-0.729283	0.0585063	0.929616	down	no
MSTRG.27950	Em0022g796a	Em0022g796a.t1	GO:0005829(cytosol);GO:0006418(tRNA aminoacylation for protein translation)	00450(Selenocompound metabolism);00970(Aminoacyl-tRNA biosynthesis)	K01874	EC:6.1.1.10	PREDICTED: methionine--tRNA ligase, cytoplasmic-like isoform X2 [Amphimedon queenslandica]	0.286779	0.363676	0.172255	0.519432	0.511991	0.905647	0.424719	-1.23542	0.0585909	0.930213	down	no
MSTRG.13366	Em0008g967a	Em0008g967a.t1	GO:0003700(DNA binding transcription factor activity);GO:0006355(regulation of transcription, DNA-templated);GO:0006357(regulation of transcription by RNA polymerase II);GO:0019221(cytokine-mediated signaling pathway);GO:0044212(transcription regulatory region DNA binding);GO:0051607(defense response to virus)	NA	NA	NA	PREDICTED: uncharacterized protein LOC100631948 [Amphimedon queenslandica]	12.7907	8.63406	13.184	7.78573	9.06791	9.87605	1.29477	0.372697	0.0587394	0.931766	up	no
MSTRG.17277	Em0012g708a;Em0012g707a	Em0012g708a.t1;Em0012g707a.t1	GO:0000287(magnesium ion binding);GO:0000712(resolution of meiotic recombination intermediates);GO:0000819(sister chromatid segregation);GO:0003677(DNA binding);GO:0003918(DNA topoisomerase type II (ATP-hydrolyzing) activity);GO:0005524(ATP binding);GO:0005634(nucleus);GO:0005654(nucleoplasm);GO:0006265(DNA topological change);GO:0006266(DNA ligation);GO:0006268(DNA unwinding involved in DNA repl…	NA	NA	NA	PREDICTED: DNA topoisomerase 2-alpha-like isoform X3 [Branchiostoma belcheri]	16.9836	14.2225	18.1171	21.1369	21.9007	25.0593	0.724308	-0.465324	0.058783	0.931766	down	no
MSTRG.3921	Em0002g1042a	Em0002g1042a.t1	NA	NA	NA	NA		4.14441	3.93603	3.39878	6.06304	6.07413	6.73361	0.608307	-0.717128	0.0592034	0.936823	down	no
MSTRG.13611	Em0008g1241a	Em0008g1241a.t1	NA	NA	NA	NA	PREDICTED: integrin-linked kinase-associated serine/threonine phosphatase 2C-like, partial [Amphimedon queenslandica]	4.37531	5.08645	4.11862	2.76113	2.12371	2.8417	1.75763	0.813629	0.0592166	0.936823	up	no
MSTRG.15128	Em0010g303a	Em0010g303a.t1	GO:0005739(mitochondrion);GO:0006400(tRNA modification);GO:0052381(tRNA dimethylallyltransferase activity)	NA	NA	NA	PREDICTED: uncharacterized protein LOC109581930 [Amphimedon queenslandica]	0.59259	0.29904	0.280269	0.862343	0.554121	0.842724	0.518726	-0.946955	0.0593307	0.936823	down	no
MSTRG.18297	Em0013g476a	Em0013g476a.t1	GO:0003677(DNA binding)	NA	NA	NA	tigger transposable element-derived protein 4-like [Centruroides sculpturatus]	1.12815	0.849272	0.894744	0.613709	0.240771	0.690351	1.85921	0.894692	0.0594022	0.936823	up	no
MSTRG.26570	Em0021g409a	Em0021g409a.t1	GO:0001649(osteoblast differentiation);GO:0004046(aminoacylase activity);GO:0004096(catalase activity);GO:0005102(receptor binding);GO:0005739(mitochondrion);GO:0005777(peroxisome);GO:0005778(peroxisomal membrane);GO:0005925(focal adhesion);GO:0006641(triglyceride metabolic process);GO:0008203(cholesterol metabolic process);GO:0009060(aerobic respiration);GO:0009650(UV protection);GO:0014068(posi…	00630(Glyoxylate and dicarboxylate metabolism);00380(Tryptophan metabolism);04068(FoxO signaling pathway);04146(Peroxisome)	K03781	EC:1.11.1.6	PREDICTED: catalase-like [Amphimedon queenslandica]	187.13	142.826	150.278	127.765	127.305	139.789	1.21622	0.282401	0.0594137	0.936823	up	no
MSTRG.5454	Em0003g696a;Em0003g694a;Em0003g700a;Em0003g697a	Em0003g696a.t1;Em0003g694a.t1;Em0003g700a.t1;Em0003g697a.t1	NA	NA	NA	NA	PREDICTED: uncharacterized protein LOC109584386 [Amphimedon queenslandica]	2.87223	2.35731	1.93659	1.66785	1.64448	2.2522	1.28782	0.364933	0.0594335	0.936823	up	no
MSTRG.18566	Em0013g807a;Em0013g801a;Em0013g798a	Em0013g807a.t1;Em0013g801a.t1;Em0013g798a.t1	NA	NA	NA	NA	hypothetical protein pdam_00014232 [Pocillopora damicornis]	1.22898	2.68749	1.44192	1.83071	3.07417	4.68337	0.558848	-0.839473	0.059833	0.94162	down	no
MSTRG.32044	Em0452g7a	Em0452g7a.t1	NA	NA	NA	NA	PREDICTED: uncharacterized protein LOC109585984 [Amphimedon queenslandica]	1.45933	0.814244	1.15102	0.756845	0.203736	0.944549	1.79756	0.846043	0.0600814	0.944676	up	no
MSTRG.31819	Em0337g8a	Em0337g8a.t1	NA	NA	NA	NA		0	0	20.6462	0.275589	1.25669	0	13.4742	3.75213	0.0601227	0.944676	up	no
MSTRG.8472	Em0005g145a	Em0005g145a.t1	GO:0000494(box C/D snoRNA 3'-end processing);GO:0003723(RNA binding);GO:0008649(rRNA methyltransferase activity);GO:0015030(Cajal body);GO:0031167(rRNA methylation);GO:0031428(box C/D snoRNP complex);GO:0032040(small-subunit processome);GO:1990258(histone glutamine methylation);GO:1990259(histone-glutamine methyltransferase activity)	03008(Ribosome biogenesis in eukaryotes)	K14563	EC:2.1.1.-	AGAP011244-PA [Anopheles gambiae str. PEST]	13.8342	12.1849	11.6279	12.24	8.03168	7.78455	1.34185	0.424218	0.0603744	0.947877	up	no
MSTRG.20438	Em0015g654a	Em0015g654a.t1	NA	NA	NA	NA		0.991168	0.87306	1.35966	1.84339	1.69197	1.88164	0.595142	-0.748694	0.0604925	0.94898	down	no
Em0013g236a	Em0013g236a	Em0013g236a.t1	NA	NA	NA	NA	PREDICTED: uncharacterized protein LOC109588965 [Amphimedon queenslandica]	0.129323	0.219865	0.278519	0.377858	0.417217	0.501064	0.48429	-1.04606	0.0605803	0.949249	down	no
MSTRG.11779	Em0007g837a	Em0007g837a.t1	NA	NA	NA	NA		14.5721	11.7479	13.0044	22.2977	21.0532	14.3972	0.680964	-0.554349	0.0606057	0.949249	down	no
MSTRG.3822	Em0002g850a;Em0002g849a	Em0002g850a.t1;Em0002g849a.t1	GO:0000166(nucleotide binding);GO:0003924(GTPase activity);GO:0005525(GTP binding);GO:0007165(signal transduction);GO:0016020(membrane);GO:0005794(Golgi apparatus);GO:0005886(plasma membrane);GO:0006897(endocytosis);GO:0007050(cell cycle arrest);GO:0007093(mitotic cell cycle checkpoint);GO:0007265(Ras protein signal transduction);GO:0008022(protein C-terminus binding);GO:0008283(cell proliferatio…	04068(FoxO signaling pathway);04150(mTOR signaling pathway);04140(Autophagy - animal);04137(Mitophagy - animal);04933(AGE-RAGE signaling pathway in diabetic complications);04933(AGE-RAGE signaling pathway in diabetic complications)	K07827	NA	K-ras2 [Suberites domuncula]	8.47905	4.38257	13.3454	6.65766	5.94127	5.23054	1.46987	0.555688	0.0607657	0.950788	up	no
MSTRG.2798	Em0001g3447a	Em0001g3447a.t1	GO:0005515(protein binding)	04210(Apoptosis)	K02374	NA	tyrosine-protein phosphatase non-receptor type 13 isoform X7 [Octodon degus]	7.66877	6.68353	7.80112	10.5803	11.9468	8.44004	0.715387	-0.483205	0.0608142	0.950788	down	no
MSTRG.17772	Em0012g1003a	Em0012g1003a.t1	NA	NA	NA	NA		18.3522	12.384	18.7634	15.9644	9.70444	12.0974	1.31068	0.390317	0.0608481	0.950788	up	no
MSTRG.15898	Em0011g54a;Em0011g55a	Em0011g54a.t1;Em0011g55a.t1	NA	NA	NA	NA	conserved hypothetical protein [Pediculus humanus corporis]	0.5286	0.801104	1.0488	1.34675	1.38669	1.30906	0.588376	-0.765191	0.0611984	0.955506	down	no
MSTRG.31475	Em0202g12a	Em0202g12a.t1	GO:0005575(cellular_component)	00051(Fructose and mannose metabolism)	K12661	EC:4.2.1.90	PREDICTED: uncharacterized protein LOC100635379 [Amphimedon queenslandica]	0.540926	0	0.325987	1.09764	0.553707	1.20082	0.303949	-1.7181	0.0613346	0.955586	down	no
MSTRG.6913	Em0004g182a	Em0004g182a.t1	GO:0000398(mRNA splicing, via spliceosome);GO:0004004(ATP-dependent RNA helicase activity);GO:0005681(spliceosomal complex);GO:0005737(cytoplasm)	03040(Spliceosome)	K12818	EC:3.6.4.13	PREDICTED: ATP-dependent RNA helicase DHX8-like [Amphimedon queenslandica]	1.76358	1.50695	1.2524	3.75527	2.91577	2.29802	0.504282	-0.987699	0.0613648	0.955586	down	no
MSTRG.852	Em0001g968a	Em0001g968a.t1	GO:0004842(ubiquitin-protein transferase activity);GO:0005576(extracellular region);GO:0008270(zinc ion binding)	NA	NA	NA	PREDICTED: uncharacterized protein LOC100635885 [Amphimedon queenslandica]	2.4091	2.04711	1.9328	3.04049	2.92704	3.96975	0.642933	-0.637259	0.0613751	0.955586	down	no
MSTRG.23345	Em0018g445a;Em0018g439a;Em0018g469a;Em0018g480a;Em0018g455a;Em0018g435a;Em0018g479a;Em0018g478a	Em0018g445a.t1;Em0018g439a.t1;Em0018g469a.t1;Em0018g480a.t1;Em0018g455a.t1;Em0018g435a.t1;Em0018g479a.t1;Em0018g478a.t1	GO:0005634(nucleus);GO:0007033(vacuole organization);GO:0008568(microtubule-severing ATPase activity);GO:0031122(cytoplasmic microtubule organization);GO:0000920(cell separation after cytokinesis);GO:0000922(spindle pole);GO:0005524(ATP binding);GO:0005813(centrosome);GO:0005829(cytosol);GO:0006813(potassium ion transport);GO:0006997(nucleus organization);GO:0007080(mitotic metaphase plate congre…	04144(Endocytosis);04217(Necroptosis);04217(Necroptosis)	K12196	NA	PREDICTED: vacuolar protein sorting-associated protein 4B [Dipodomys ordii];PREDICTED: vacuolar protein sorting-associated protein 4B isoform X2 [Poecilia mexicana];PREDICTED: vacuolar protein sorting-associated protein 4B [Sinocyclocheilus grahami];AGAP000625-PA [Anopheles gambiae str. PEST];PREDICTED: vacuolar protein sorting-associated protein 4B isoform X1 [Scleropages formosus];PREDICTED: va…	5.04371	4.8212	4.69009	3.84307	4.01723	4.20674	1.20618	0.270444	0.0614142	0.955586	up	no
MSTRG.4297	Em0002g1415a	Em0002g1415a.t1	GO:0004175(endopeptidase activity);GO:0004930(G-protein coupled receptor activity);GO:0005886(plasma membrane);GO:0007165(signal transduction);GO:0007186(G-protein coupled receptor signaling pathway);GO:0016020(membrane);GO:0016021(integral component of membrane);GO:0030246(carbohydrate binding);GO:0097264(self proteolysis)	NA	NA	NA	PREDICTED: uncharacterized protein LOC105316852 [Amphimedon queenslandica]	1.02079	1.80408	0.773505	2.01172	1.6885	2.39916	0.589959	-0.761314	0.061445	0.955586	down	no
MSTRG.20730	Em0015g983a	Em0015g983a.t1	GO:0005634(nucleus);GO:0015630(microtubule cytoskeleton)	NA	NA	NA	PREDICTED: tektin-1-like [Acropora digitifera]	3.15557	2.81751	3.78231	4.01687	6.6059	5.06906	0.621686	-0.685741	0.0616037	0.95704	down	no
MSTRG.10611	Em0006g932a	Em0006g932a.t1	NA	04512(ECM-receptor interaction)	K19719	NA	PREDICTED: collagen alpha-1(I) chain-like isoform X1 [Amphimedon queenslandica]	39.4542	49.0679	35.4024	49.055	57.7666	65.5413	0.718975	-0.475987	0.0616353	0.95704	down	no
MSTRG.16704	Em0011g1005a	Em0011g1005a.t1	NA	NA	NA	NA		0.947348	0.897747	0.584123	0.350675	0.603856	0.191623	2.11945	1.08369	0.0617145	0.957519	up	no
MSTRG.14404	Em0009g978a	Em0009g978a.t1	NA	NA	NA	NA		2.35757	2.21364	2.27436	3.71782	3.51182	3.81969	0.619547	-0.690715	0.0618031	0.958142	down	no
MSTRG.32226	Em0557g4a	Em0557g4a.t1	GO:0005737(cytoplasm);GO:0005886(plasma membrane)	00910(Nitrogen metabolism)	K01672	EC:4.2.1.1	ATP synthase F0 subunit 6 (mitochondrion) [Ephydatia muelleri]	5.8129	10.4234	0.464641	4.55992	0.71669	0.401031	2.94153	1.55657	0.0618757	0.958515	up	no
MSTRG.27643	Em0022g506a	Em0022g506a.t1	GO:0003824(catalytic activity);GO:0008152(metabolic process)	00061(Fatty acid biosynthesis);00071(Fatty acid degradation);04920(Adipocytokine signaling pathway);03320(PPAR signaling pathway)	K15013	EC:6.2.1.3	long-chain-fatty-acid--CoA ligase ACSBG2 [Pangasianodon hypophthalmus]	2.67434	2.7364	1.78942	1.47096	1.62747	1.59769	1.53322	0.616561	0.0620453	0.959927	up	no
MSTRG.8790	Em0005g666a	Em0005g666a.t1	GO:0000002(mitochondrial genome maintenance);GO:0005634(nucleus);GO:0005657(replication fork);GO:0005739(mitochondrion);GO:0006260(DNA replication);GO:0010521(telomerase inhibitor activity);GO:0032211(negative regulation of telomere maintenance via telomerase);GO:0032508(DNA duplex unwinding);GO:0043141(ATP-dependent 5'-3' DNA helicase activity);GO:0044806(G-quadruplex DNA unwinding);GO:0051974(n…	NA	NA	NA	PREDICTED: uncharacterized protein LOC105314614, partial [Amphimedon queenslandica]	0.343327	0.18279	0.215247	0.475943	0.325873	0.793213	0.464797	-1.10533	0.0620638	0.959927	down	no
MSTRG.20738	Em0015g989a;Em0015g991a	Em0015g989a.t1;Em0015g991a.t1	NA	NA	NA	NA	PREDICTED: uncharacterized protein LOC109582886 [Amphimedon queenslandica];PREDICTED: uncharacterized protein LOC109587445 isoform X2 [Amphimedon queenslandica]	0.210054	0.363004	0.0592386	0.465428	0.314402	0.659369	0.43934	-1.18659	0.0623491	0.962761	down	no
Em0008g420a	Em0008g420a	Em0008g420a.t1	GO:0003676(nucleic acid binding);GO:0004190(aspartic-type endopeptidase activity);GO:0006508(proteolysis);GO:0015074(DNA integration)	NA	NA	NA	hypothetical protein M514_27378 [Trichuris suis]	0.347711	0.064251	0.198473	0.641931	0.420969	0.316374	0.442577	-1.176	0.0623937	0.962761	down	no
MSTRG.32867	Em1131g1a	Em1131g1a.t1	NA	NA	NA	NA		3.8683	4.91585	3.35498	3.16146	3.12839	1.41776	1.57495	0.65531	0.0624759	0.962761	up	no
MSTRG.17168	Em0012g462a	Em0012g462a.t1	GO:0005509(calcium ion binding);GO:0008270(zinc ion binding)	04120(Ubiquitin mediated proteolysis)	K10595	EC:2.3.2.26	PREDICTED: zinc finger ZZ-type and EF-hand domain-containing protein 1-like isoform X2 [Amphimedon queenslandica]	6.9742	6.63658	5.84251	5.28396	4.9569	5.90723	1.20468	0.268651	0.0624904	0.962761	up	no
Em0001g2378a	Em0001g2378a	Em0001g2378a.t1	GO:0003674(molecular_function);GO:0005575(cellular_component);GO:0008150(biological_process)	NA	NA	NA	PREDICTED: putative nuclease HARBI1 [Amphimedon queenslandica]	0.282587	0.182977	0.198219	0.361036	0.459293	0.471639	0.513777	-0.960787	0.0626269	0.963519	down	no
MSTRG.32458	Em0701g1a	Em0701g1a.t1	GO:0000346(transcription export complex);GO:0000347(THO complex);GO:0000445(THO complex part of transcription export complex);GO:0000784(nuclear chromosome, telomeric region);GO:0003723(RNA binding);GO:0005515(protein binding);GO:0005622(intracellular);GO:0005634(nucleus);GO:0005654(nucleoplasm);GO:0006397(mRNA processing);GO:0006406(mRNA export from nucleus);GO:0006915(apoptotic process);GO:0007…	03013(RNA transport)	K13175	NA	PREDICTED: THO complex subunit 6 homolog [Amphimedon queenslandica]	1.3065	0.0228047	0	0.863329	2.39135	2.37008	0.236331	-2.08112	0.0626882	0.963519	down	no
MSTRG.29952	Em0033g17a	Em0033g17a.t1	NA	NA	NA	NA	PREDICTED: uncharacterized protein LOC109583594 [Amphimedon queenslandica]	1.89191	1.79599	2.59998	1.50653	1.48046	1.17191	1.51191	0.59637	0.0627593	0.963519	up	no
MSTRG.9941	Em0006g465a	Em0006g465a.t1	NA	NA	NA	NA		0.922606	2.17523	0.863721	2.6394	1.90446	3.32318	0.503564	-0.989753	0.0628301	0.963519	down	no
MSTRG.17424	Em0012g673a	Em0012g673a.t1	GO:0003723(RNA binding);GO:0003735(structural constituent of ribosome);GO:0006412(translation);GO:0022625(cytosolic large ribosomal subunit)	NA	NA	NA	PREDICTED: uncharacterized protein LOC105316950 [Amphimedon queenslandica]	0.605408	0.587219	0.133292	1.5152	0.794331	1.44166	0.353466	-1.50036	0.0628319	0.963519	down	no
MSTRG.20468	Em0015g683a	Em0015g683a.t1	GO:0000719(photoreactive repair);GO:0003904(deoxyribodipyrimidine photo-lyase activity)	03015(mRNA surveillance pathway)	K14401	NA	PREDICTED: uncharacterized protein K02A2.6-like [Branchiostoma belcheri]	2.01064	1.71217	1.76101	1.06322	1.17231	1.6967	1.39458	0.479835	0.0628926	0.963704	up	no
[truncated: 27,385 more rows]

## Sheet: Transcripts
t_id	class_code	chr	strand	start	end	t_name	num_exons	length	gene_id	gene_name	GO	KEGG	KO_ENTRY	EC	Description	FPKM.EmInf1	FPKM.EmInf2	FPKM.EmInf3	FPKM.EmApo1	FPKM.EmApo2	FPKM.EmApo3	fc	log2(fc)	pval	qval	regulation	significant
[truncated: 31,459 more rows]
