# Supplementary material for: Freshwater sponge hosts and their green algae symbionts: a tractable model to understand intracellular symbiosis
Source: PeerJ. 2021 Feb 11;9:e10654. doi: 10.7717/peerj.10654 (PMC7882143; doi:10.7717/peerj.10654)
Supplement: Supplemental Information 13 [file peerj-09-10654-s013.xlsx]

## Sheet: Sheet1
pathway_id	pathway_name	pvalue	Gene_name	Gene_ID	KO_Entry	EC	fc	log2(fc)	regulation
ko00982	Drug metabolism - cytochrome P450	7.29964e-05	Em0001g1335a	MSTRG.1082	K00799	EC:2.5.1.18	7.69231	2.94342	up
ko00982	Drug metabolism - cytochrome P450	7.29964e-05	Em0005g1017a	MSTRG.9103	K04097	EC:5.3.99.2;EC:2.5.1.18	0.364095	-1.45761	down
ko00982	Drug metabolism - cytochrome P450	7.29964e-05	Em0009g598a	MSTRG.14121	K04097	EC:5.3.99.2;EC:2.5.1.18	5.29878	2.40566	up
ko00982	Drug metabolism - cytochrome P450	7.29964e-05	Em0012g663a	MSTRG.17414	K04097	EC:5.3.99.2;EC:2.5.1.18	4.4794	2.16331	up
ko00982	Drug metabolism - cytochrome P450	7.29964e-05	Em0012g670a	MSTRG.17421	K04097	EC:5.3.99.2;EC:2.5.1.18	4.67237	2.22415	up
ko00982	Drug metabolism - cytochrome P450	7.29964e-05	Em0018g1045a	MSTRG.23796	K00485	EC:1.14.13.8	0.0907508	-3.46195	down
ko01524	Platinum drug resistance	9.86687e-05	Em0084g5a	MSTRG.30716	K04398	EC:3.4.22.61	0.418739	-1.25588	down
ko00290	Valine, leucine and isoleucine biosynthesis	0.000315446	Em0015g1250a	MSTRG.20941	K17989	EC:4.3.1.17;EC:4.3.1.19	0.472777	-1.08077	down
ko00290	Valine, leucine and isoleucine biosynthesis	0.000315446	Em0360g3a	MSTRG.31851	K00826	EC:2.6.1.42	0.409654	-1.28752	down
ko00290	Valine, leucine and isoleucine biosynthesis	0.000315446	Em0597g2a	MSTRG.32311	K17989	EC:4.3.1.17;EC:4.3.1.19	inf	inf	up
ko00590	Arachidonic acid metabolism	0.000371171	Em0001g1075a	MSTRG.909	K01254	EC:3.3.2.6	4.71767	2.23807	up
ko00590	Arachidonic acid metabolism	0.000371171	Em0005g1017a	MSTRG.9103	K04097	EC:5.3.99.2;EC:2.5.1.18	0.364095	-1.45761	down
ko00590	Arachidonic acid metabolism	0.000371171	Em0008g1269a	MSTRG.13598	K15717	EC:1.11.1.20	2.63957	1.4003	up
ko00590	Arachidonic acid metabolism	0.000371171	Em0009g598a	MSTRG.14121	K04097	EC:5.3.99.2;EC:2.5.1.18	5.29878	2.40566	up
ko00590	Arachidonic acid metabolism	0.000371171	Em0012g663a	MSTRG.17414	K04097	EC:5.3.99.2;EC:2.5.1.18	4.4794	2.16331	up
ko00590	Arachidonic acid metabolism	0.000371171	Em0012g670a	MSTRG.17421	K04097	EC:5.3.99.2;EC:2.5.1.18	4.67237	2.22415	up
ko00590	Arachidonic acid metabolism	0.000371171	Em0013g542a	MSTRG.18383	K16343	EC:3.1.1.4	0.220354	-2.1821	down
ko00480	Glutathione metabolism	0.00151324	Em0001g1335a	MSTRG.1082	K00799	EC:2.5.1.18	7.69231	2.94342	up
ko00480	Glutathione metabolism	0.00151324	Em0005g1017a	MSTRG.9103	K04097	EC:5.3.99.2;EC:2.5.1.18	0.364095	-1.45761	down
ko00480	Glutathione metabolism	0.00151324	Em0009g598a	MSTRG.14121	K04097	EC:5.3.99.2;EC:2.5.1.18	5.29878	2.40566	up
ko00480	Glutathione metabolism	0.00151324	Em0012g663a	MSTRG.17414	K04097	EC:5.3.99.2;EC:2.5.1.18	4.4794	2.16331	up
ko00480	Glutathione metabolism	0.00151324	Em0012g670a	MSTRG.17421	K04097	EC:5.3.99.2;EC:2.5.1.18	4.67237	2.22415	up
ko00980	Metabolism of xenobiotics by cytochrome P450	0.00164664	Em0001g1335a	MSTRG.1082	K00799	EC:2.5.1.18	7.69231	2.94342	up
ko00980	Metabolism of xenobiotics by cytochrome P450	0.00164664	Em0005g1017a	MSTRG.9103	K04097	EC:5.3.99.2;EC:2.5.1.18	0.364095	-1.45761	down
ko00980	Metabolism of xenobiotics by cytochrome P450	0.00164664	Em0009g598a	MSTRG.14121	K04097	EC:5.3.99.2;EC:2.5.1.18	5.29878	2.40566	up
ko00980	Metabolism of xenobiotics by cytochrome P450	0.00164664	Em0012g663a	MSTRG.17414	K04097	EC:5.3.99.2;EC:2.5.1.18	4.4794	2.16331	up
ko00980	Metabolism of xenobiotics by cytochrome P450	0.00164664	Em0012g670a	MSTRG.17421	K04097	EC:5.3.99.2;EC:2.5.1.18	4.67237	2.22415	up
ko04611	Platelet activation	0.0024766	Em0157g3a	MSTRG.31255	K06493	NA	2.63114	1.39569	up
ko05165	Human papillomavirus infection	0.00564746	Em0008g717a	MSTRG.13214	K03174	NA	2.02822	1.02021	up
ko05165	Human papillomavirus infection	0.00564746	Em0084g5a	MSTRG.30716	K04398	EC:3.4.22.61	0.418739	-1.25588	down
ko05165	Human papillomavirus infection	0.00564746	Em0157g3a	MSTRG.31255	K06493	NA	2.63114	1.39569	up
ko05202	Transcriptional misregulation in cancers	0.0105747	Em0012g623a	MSTRG.17561	K11253	NA	0.236332	-2.08111	down
ko05202	Transcriptional misregulation in cancers	0.0105747	Em0020g913a	MSTRG.25958	K15621	NA	0.0100832	-6.6319	down
ko05203	Viral carcinogenesis	0.0195903	Em0008g717a	MSTRG.13214	K03174	NA	2.02822	1.02021	up
ko05203	Viral carcinogenesis	0.0195903	Em0084g5a	MSTRG.30716	K04398	EC:3.4.22.61	0.418739	-1.25588	down
ko05322	Systemic lupus erythematosus	0.0234199	Em0012g623a	MSTRG.17561	K11253	NA	0.236332	-2.08111	down
ko00260	Glycine, serine and threonine metabolism	0.0258905	Em0005g1117a	MSTRG.9195	K00306	EC:1.5.3.1;EC:1.5.3.7	45.4639	5.50665	up
ko00260	Glycine, serine and threonine metabolism	0.0258905	Em0015g1250a	MSTRG.20941	K17989	EC:4.3.1.17;EC:4.3.1.19	0.472777	-1.08077	down
ko00260	Glycine, serine and threonine metabolism	0.0258905	Em0597g2a	MSTRG.32311	K17989	EC:4.3.1.17;EC:4.3.1.19	inf	inf	up
ko04640	Hematopoietic cell lineage	0.0318705	Em0157g3a	MSTRG.31255	K06493	NA	2.63114	1.39569	up
ko05034	Alcoholism	0.0365905	Em0012g623a	MSTRG.17561	K11253	NA	0.236332	-2.08111	down
ko00790	Folate biosynthesis	0.04356	Em0008g621a	MSTRG.13025	K00011	EC:1.1.1.21	2.79717	1.48397	up
ko00790	Folate biosynthesis	0.04356	Em0015g881a	MSTRG.20537	K00500	EC:1.14.16.1	0.129375	-2.95037	down
ko00790	Folate biosynthesis	0.04356	Em0058g11a	MSTRG.30413	K00011	EC:1.1.1.21	3.51171	1.81218	up
ko04657	IL-17 signaling pathway	0.0440165	Em0008g717a	MSTRG.13214	K03174	NA	2.02822	1.02021	up
ko04657	IL-17 signaling pathway	0.0440165	Em0084g5a	MSTRG.30716	K04398	EC:3.4.22.61	0.418739	-1.25588	down
ko04622	RIG-I-like receptor signaling pathway	0.0504981	Em0008g713a	MSTRG.13205	K03174	NA	2.26452	1.1792	up
ko04622	RIG-I-like receptor signaling pathway	0.0504981	Em0008g717a	MSTRG.13214	K03174	NA	2.02822	1.02021	up
ko04622	RIG-I-like receptor signaling pathway	0.0504981	Em0084g5a	MSTRG.30716	K04398	EC:3.4.22.61	0.418739	-1.25588	down
ko05160	Hepatitis C	0.0560899	Em0008g717a	MSTRG.13214	K03174	NA	2.02822	1.02021	up
ko05160	Hepatitis C	0.0560899	Em0015g1306a	MSTRG.21026	K14216	EC:2.7.7.84	0.146465	-2.77137	down
ko04668	TNF signaling pathway	0.0603442	Em0008g717a	MSTRG.13214	K03174	NA	2.02822	1.02021	up
ko04668	TNF signaling pathway	0.0603442	Em0084g5a	MSTRG.30716	K04398	EC:3.4.22.61	0.418739	-1.25588	down
ko05167	Kaposi sarcoma-associated herpesvirus infection	0.0647056	Em0008g717a	MSTRG.13214	K03174	NA	2.02822	1.02021	up
ko05167	Kaposi sarcoma-associated herpesvirus infection	0.0647056	Em0084g5a	MSTRG.30716	K04398	EC:3.4.22.61	0.418739	-1.25588	down
ko00270	Cysteine and methionine metabolism	0.0722915	Em0005g1116a	MSTRG.9194	K03334	EC:1.4.3.2	303.937	8.24763	up
ko00270	Cysteine and methionine metabolism	0.0722915	Em0015g1250a	MSTRG.20941	K17989	EC:4.3.1.17;EC:4.3.1.19	0.472777	-1.08077	down
ko00270	Cysteine and methionine metabolism	0.0722915	Em0360g3a	MSTRG.31851	K00826	EC:2.6.1.42	0.409654	-1.28752	down
ko00270	Cysteine and methionine metabolism	0.0722915	Em0597g2a	MSTRG.32311	K17989	EC:4.3.1.17;EC:4.3.1.19	inf	inf	up
ko00400	Phenylalanine, tyrosine and tryptophan biosynthesis	0.0737321	Em0005g1116a	MSTRG.9194	K03334	EC:1.4.3.2	303.937	8.24763	up
ko00400	Phenylalanine, tyrosine and tryptophan biosynthesis	0.0737321	Em0015g881a	MSTRG.20537	K00500	EC:1.14.16.1	0.129375	-2.95037	down
ko04621	NOD-like receptor signaling pathway	0.0751402	Em0003g1630a	MSTRG.6482	K04612	NA	3.55178	1.82854	up
ko04621	NOD-like receptor signaling pathway	0.0751402	Em0008g713a	MSTRG.13205	K03174	NA	2.26452	1.1792	up
ko04621	NOD-like receptor signaling pathway	0.0751402	Em0008g717a	MSTRG.13214	K03174	NA	2.02822	1.02021	up
ko04621	NOD-like receptor signaling pathway	0.0751402	Em0010g489a	Em0010g489a	K04612	NA	0.267136	-1.90436	down
ko04621	NOD-like receptor signaling pathway	0.0751402	Em0013g65a	MSTRG.17924	K04612	NA	2.00957	1.00689	up
ko04621	NOD-like receptor signaling pathway	0.0751402	Em0014g82a	Em0014g82a	K04612	NA	0.333986	-1.58214	down
ko04621	NOD-like receptor signaling pathway	0.0751402	Em0014g937a	MSTRG.19704	K04612	NA	2.19248	1.13256	up
ko04621	NOD-like receptor signaling pathway	0.0751402	Em0015g1306a	MSTRG.21026	K14216	EC:2.7.7.84	0.146465	-2.77137	down
ko04621	NOD-like receptor signaling pathway	0.0751402	Em0017g333a	MSTRG.22358	K04612	NA	3.10163	1.63303	up
ko04621	NOD-like receptor signaling pathway	0.0751402	Em0018g591a	Em0018g591a	K04612	NA	3.62368	1.85746	up
ko04621	NOD-like receptor signaling pathway	0.0751402	Em0023g958a	MSTRG.29027	K04612	NA	0.219436	-2.18813	down
ko04621	NOD-like receptor signaling pathway	0.0751402	Em0053g2a	MSTRG.30326	K04612	NA	2.27028	1.18287	up
ko04621	NOD-like receptor signaling pathway	0.0751402	Em0084g5a	MSTRG.30716	K04398	EC:3.4.22.61	0.418739	-1.25588	down
ko04621	NOD-like receptor signaling pathway	0.0751402	Em0098g14a	MSTRG.30834	K04612	NA	2.17064	1.11812	up
ko04621	NOD-like receptor signaling pathway	0.0751402	Em0269g8a	MSTRG.31667	K04612	NA	0.295936	-1.75664	down
ko05163	Human cytomegalovirus infection	0.0783887	Em0084g5a	MSTRG.30716	K04398	EC:3.4.22.61	0.418739	-1.25588	down
ko05163	Human cytomegalovirus infection	0.0783887	Em0157g3a	MSTRG.31255	K06493	NA	2.63114	1.39569	up
ko04620	Toll-like receptor signaling pathway	0.0861727	Em0008g713a	MSTRG.13205	K03174	NA	2.26452	1.1792	up
ko04620	Toll-like receptor signaling pathway	0.0861727	Em0008g717a	MSTRG.13214	K03174	NA	2.02822	1.02021	up
ko04620	Toll-like receptor signaling pathway	0.0861727	Em0084g5a	MSTRG.30716	K04398	EC:3.4.22.61	0.418739	-1.25588	down
ko03320	PPAR signaling pathway	0.0879676	Em0001g2739a	MSTRG.2161	K08770	NA	2.05952	1.04231	up
ko03320	PPAR signaling pathway	0.0879676	Em0016g788a	MSTRG.21715	K08770	NA	3.77888	1.91796	up
ko00981	Insect hormone biosynthesis	0.0926235	Em0013g767a	MSTRG.18540	K15890	EC:1.1.1.216	0.449319	-1.15419	down
ko04919	Thyroid hormone signaling pathway	0.0926235	Em0157g3a	MSTRG.31255	K06493	NA	2.63114	1.39569	up
ko05412	Arrhythmogenic right ventricular cardiomyopathy (ARVC)	0.0926235	Em0157g3a	MSTRG.31255	K06493	NA	2.63114	1.39569	up
ko05164	Influenza A	0.092882	Em0002g833a	MSTRG.3737	K03283	NA	0.437714	-1.19194	down
ko05164	Influenza A	0.092882	Em0015g1306a	MSTRG.21026	K14216	EC:2.7.7.84	0.146465	-2.77137	down
ko05414	Dilated cardiomyopathy (DCM)	0.107212	Em0157g3a	MSTRG.31255	K06493	NA	2.63114	1.39569	up
ko05410	Hypertrophic cardiomyopathy (HCM)	0.107212	Em0157g3a	MSTRG.31255	K06493	NA	2.63114	1.39569	up
ko05206	MicroRNAs in cancer	0.107212	Em0157g3a	MSTRG.31255	K06493	NA	2.63114	1.39569	up
ko05340	Primary immunodeficiency	0.107212	Em0015g473a	Em0015g473a	K01488	EC:3.5.4.4	0.00968498	-6.69003	down
ko00360	Phenylalanine metabolism	0.118554	Em0005g1116a	MSTRG.9194	K03334	EC:1.4.3.2	303.937	8.24763	up
ko00360	Phenylalanine metabolism	0.118554	Em0015g881a	MSTRG.20537	K00500	EC:1.14.16.1	0.129375	-2.95037	down
ko05100	Bacterial invasion of epithelial cells	0.121568	Em0003g1549a	MSTRG.6392	K13738	NA	0.327922	-1.60858	down
ko00350	Tyrosine metabolism	0.123884	Em0005g1116a	MSTRG.9194	K03334	EC:1.4.3.2	303.937	8.24763	up
ko05200	Pathways in cancer	0.134712	Em0008g717a	MSTRG.13214	K03174	NA	2.02822	1.02021	up
ko05200	Pathways in cancer	0.134712	Em0084g5a	MSTRG.30716	K04398	EC:3.4.22.61	0.418739	-1.25588	down
ko05016	Huntington disease	0.135696	Em0084g5a	MSTRG.30716	K04398	EC:3.4.22.61	0.418739	-1.25588	down
ko00250	Alanine, aspartate and glutamate metabolism	0.145744	Em0005g1116a	MSTRG.9194	K03334	EC:1.4.3.2	303.937	8.24763	up
ko00250	Alanine, aspartate and glutamate metabolism	0.145744	Em0019g157a	MSTRG.24118	K01953	EC:6.3.5.4	2.06306	1.04479	up
ko04142	Lysosome	0.148438	Em0004g1389a	MSTRG.7975	K01158	EC:3.1.22.1	2.13457	1.09395	up
ko04142	Lysosome	0.148438	Em0005g239a	MSTRG.8435	K02144	NA	0.146351	-2.7725	down
ko04142	Lysosome	0.148438	Em0006g517a	MSTRG.9947	K06129	EC:3.1.1.5	inf	inf	up
ko04142	Lysosome	0.148438	Em0011g422a	MSTRG.16149	K14379	EC:3.1.3.2	10.4088	3.37973	up
ko04142	Lysosome	0.148438	Em0019g235a	MSTRG.24201	K13443	NA	2.65921	1.411	up
ko04142	Lysosome	0.148438	Em0019g324a	MSTRG.24270	K01365	EC:3.4.22.15	2.43661	1.28488	up
ko00052	Galactose metabolism	0.151329	Em0008g621a	MSTRG.13025	K00011	EC:1.1.1.21	2.79717	1.48397	up
ko00052	Galactose metabolism	0.151329	Em0058g11a	MSTRG.30413	K00011	EC:1.1.1.21	3.51171	1.81218	up
ko03450	Non-homologous end-joining	0.156957	Em0341g1a	MSTRG.31823	K06642	EC:2.7.11.1	0.264322	-1.91963	down
ko03450	Non-homologous end-joining	0.156957	Em0341g3a	MSTRG.31828	K06642	EC:2.7.11.1	0.47297	-1.08018	down
ko00380	Tryptophan metabolism	0.162624	Em0005g1116a	MSTRG.9194	K03334	EC:1.4.3.2	303.937	8.24763	up
ko00380	Tryptophan metabolism	0.162624	Em0005g114a	MSTRG.8325	K00486	EC:1.14.13.9	2.09391	1.0662	up
ko00740	Riboflavin metabolism	0.163279	Em0011g422a	MSTRG.16149	K14379	EC:3.1.3.2	10.4088	3.37973	up
ko05168	Herpes simplex infection	0.168314	Em0008g713a	MSTRG.13205	K03174	NA	2.26452	1.1792	up
ko05168	Herpes simplex infection	0.168314	Em0008g717a	MSTRG.13214	K03174	NA	2.02822	1.02021	up
ko05168	Herpes simplex infection	0.168314	Em0015g1306a	MSTRG.21026	K14216	EC:2.7.7.84	0.146465	-2.77137	down
ko05168	Herpes simplex infection	0.168314	Em0084g5a	MSTRG.30716	K04398	EC:3.4.22.61	0.418739	-1.25588	down
ko00051	Fructose and mannose metabolism	0.168328	Em0008g621a	MSTRG.13025	K00011	EC:1.1.1.21	2.79717	1.48397	up
ko00051	Fructose and mannose metabolism	0.168328	Em0058g11a	MSTRG.30413	K00011	EC:1.1.1.21	3.51171	1.81218	up
ko05010	Alzheimer disease	0.176741	Em0084g5a	MSTRG.30716	K04398	EC:3.4.22.61	0.418739	-1.25588	down
ko05161	Hepatitis B	0.176741	Em0084g5a	MSTRG.30716	K04398	EC:3.4.22.61	0.418739	-1.25588	down
ko00040	Pentose and glucuronate interconversions	0.179835	Em0008g621a	MSTRG.13025	K00011	EC:1.1.1.21	2.79717	1.48397	up
ko00040	Pentose and glucuronate interconversions	0.179835	Em0058g11a	MSTRG.30413	K00011	EC:1.1.1.21	3.51171	1.81218	up
ko04120	Ubiquitin mediated proteolysis	0.181525	Em0004g1615a	MSTRG.8179	K07868	NA	0.451227	-1.14807	down
ko04120	Ubiquitin mediated proteolysis	0.181525	Em0009g363a	MSTRG.13982	K10594	EC:2.3.2.26	0.371921	-1.42693	down
ko04120	Ubiquitin mediated proteolysis	0.181525	Em0015g752a	Em0015g752a	K03354	NA	0.0800529	-3.6429	down
ko04120	Ubiquitin mediated proteolysis	0.181525	Em0017g461a	MSTRG.22506	K10260	NA	0.459601	-1.12154	down
ko05142	Chagas disease (American trypanosomiasis)	0.189989	Em0084g5a	MSTRG.30716	K04398	EC:3.4.22.61	0.418739	-1.25588	down
ko04970	Salivary secretion	0.19146	Em0380g1a	MSTRG.31872	K13912	NA	inf	inf	up
ko05418	Fluid shear stress and atherosclerosis	0.203026	Em0157g3a	MSTRG.31255	K06493	NA	2.63114	1.39569	up
ko05416	Viral myocarditis	0.215855	Em0084g5a	MSTRG.30716	K04398	EC:3.4.22.61	0.418739	-1.25588	down
ko05205	Proteoglycans in cancer	0.215855	Em0157g3a	MSTRG.31255	K06493	NA	2.63114	1.39569	up
ko05162	Measles	0.215855	Em0015g1306a	MSTRG.21026	K14216	EC:2.7.7.84	0.146465	-2.77137	down
ko00770	Pantothenate and CoA biosynthesis	0.215855	Em0360g3a	MSTRG.31851	K00826	EC:2.6.1.42	0.409654	-1.28752	down
ko04932	Non-alcoholic fatty liver disease (NAFLD)	0.22848	Em0084g5a	MSTRG.30716	K04398	EC:3.4.22.61	0.418739	-1.25588	down
ko05222	Small cell lung cancer	0.22848	Em0008g717a	MSTRG.13214	K03174	NA	2.02822	1.02021	up
ko05152	Tuberculosis	0.22848	Em0084g5a	MSTRG.30716	K04398	EC:3.4.22.61	0.418739	-1.25588	down
ko04151	PI3K-Akt signaling pathway	0.22848	Em0157g3a	MSTRG.31255	K06493	NA	2.63114	1.39569	up
ko04210	Apoptosis	0.232804	Em0018g779a	MSTRG.23599	K07374	NA	0.434425	-1.20282	down
ko04210	Apoptosis	0.232804	Em0084g5a	MSTRG.30716	K04398	EC:3.4.22.61	0.418739	-1.25588	down
ko00280	Valine, leucine and isoleucine degradation	0.238766	Em0005g1116a	MSTRG.9194	K03334	EC:1.4.3.2	303.937	8.24763	up
ko00280	Valine, leucine and isoleucine degradation	0.238766	Em0360g3a	MSTRG.31851	K00826	EC:2.6.1.42	0.409654	-1.28752	down
ko04540	Gap junction	0.240903	Em0018g779a	MSTRG.23599	K07374	NA	0.434425	-1.20282	down
ko05134	Legionellosis	0.240903	Em0084g5a	MSTRG.30716	K04398	EC:3.4.22.61	0.418739	-1.25588	down
ko04217	Necroptosis	0.250713	Em0084g5a	MSTRG.30716	K04398	EC:3.4.22.61	0.418739	-1.25588	down
ko00100	Steroid biosynthesis	0.250713	Em0023g99a	MSTRG.28233	K00559	EC:2.1.1.41	8.70257	3.12144	up
ko00100	Steroid biosynthesis	0.250713	Em0346g4a	MSTRG.31831	K00637	EC:2.3.1.26	0.329477	-1.60175	down
ko00340	Histidine metabolism	0.253128	Em0017g282a	MSTRG.22326	K01745	EC:4.3.1.3	0.345257	-1.53426	down
ko04015	Rap1 signaling pathway	0.288645	Em0157g3a	MSTRG.31255	K06493	NA	2.63114	1.39569	up
ko00970	Aminoacyl-tRNA biosynthesis	0.292587	Em0456g3a	MSTRG.32050	K01870	EC:6.1.1.5	2.96321	1.56716	up
ko00970	Aminoacyl-tRNA biosynthesis	0.292587	Em1372g1a	MSTRG.32970	K03341	EC:2.9.1.2	0.107091	-3.22309	down
ko04215	Apoptosis - multiple species	0.300108	Em0084g5a	MSTRG.30716	K04398	EC:3.4.22.61	0.418739	-1.25588	down
ko05145	Toxoplasmosis	0.300108	Em0084g5a	MSTRG.30716	K04398	EC:3.4.22.61	0.418739	-1.25588	down
ko04064	NF-kappa B signaling pathway	0.300108	Em0008g717a	MSTRG.13214	K03174	NA	2.02822	1.02021	up
ko04380	Osteoclast differentiation	0.311388	Em0157g3a	MSTRG.31255	K06493	NA	2.63114	1.39569	up
ko03430	Mismatch repair	0.311388	Em0005g1306a	MSTRG.9451	K10754	NA	0.276261	-1.85589	down
ko05169	Epstein-Barr virus infection	0.344158	Em0008g717a	MSTRG.13214	K03174	NA	2.02822	1.02021	up
ko00520	Amino sugar and nucleotide sugar metabolism	0.345943	Em0004g158a	MSTRG.6815	K00698	EC:2.4.1.16	2.77165	1.47075	up
ko00520	Amino sugar and nucleotide sugar metabolism	0.345943	Em0004g162a	MSTRG.6889	K00698	EC:2.4.1.16	3.19049	1.67378	up
ko03420	Nucleotide excision repair	0.351975	Em0005g1306a	MSTRG.9451	K10754	NA	0.276261	-1.85589	down
ko03420	Nucleotide excision repair	0.351975	Em0014g704a	MSTRG.19411	K10848	EC:3.1.-.-	3.13965	1.6506	up
ko03420	Nucleotide excision repair	0.351975	Em0021g613a	MSTRG.26742	K10846	NA	0.472132	-1.08274	down
ko00900	Terpenoid backbone biosynthesis	0.365142	Em0013g767a	MSTRG.18540	K15890	EC:1.1.1.216	0.449319	-1.15419	down
ko01040	Biosynthesis of unsaturated fatty acids	0.375383	Em0017g556a	MSTRG.22561	K10224	EC:1.14.19.44	2.02314	1.01659	up
ko04115	p53 signaling pathway	0.375383	Em0084g5a	MSTRG.30716	K04398	EC:3.4.22.61	0.418739	-1.25588	down
ko04150	mTOR signaling pathway	0.378406	Em0005g239a	MSTRG.8435	K02144	NA	0.146351	-2.7725	down
ko04150	mTOR signaling pathway	0.378406	Em0007g1462a	MSTRG.12333	K07208	NA	2.04279	1.03054	up
ko04150	mTOR signaling pathway	0.378406	Em0784g1a	MSTRG.32579	K02649	NA	0.375399	-1.4135	down
ko00561	Glycerolipid metabolism	0.386561	Em0008g621a	MSTRG.13025	K00011	EC:1.1.1.21	2.79717	1.48397	up
ko00561	Glycerolipid metabolism	0.386561	Em0058g11a	MSTRG.30413	K00011	EC:1.1.1.21	3.51171	1.81218	up
ko04137	Mitophagy - animal	0.391548	Em0022g109a	MSTRG.27257	K14381	NA	4.46479	2.15859	up
ko00120	Primary bile acid biosynthesis	0.405135	Em0019g987a	MSTRG.24850	K07440	EC:1.14.14.25	2.15891	1.11031	up
ko00591	Linoleic acid metabolism	0.414737	Em0013g542a	MSTRG.18383	K16343	EC:3.1.1.4	0.220354	-2.1821	down
ko00190	Oxidative phosphorylation	0.420504	Em0001g3449a	MSTRG.2803	K02136	NA	-inf	-inf	down
ko00190	Oxidative phosphorylation	0.420504	Em0005g239a	MSTRG.8435	K02144	NA	0.146351	-2.7725	down
ko04146	Peroxisome	0.421934	Em0005g1117a	MSTRG.9195	K00306	EC:1.5.3.1;EC:1.5.3.7	45.4639	5.50665	up
ko04146	Peroxisome	0.421934	Em0705g3a	MSTRG.32465	K05678	NA	-inf	-inf	down
ko04625	C-type lectin receptor signaling pathway	0.424186	Em0084g5a	MSTRG.30716	K04398	EC:3.4.22.61	0.418739	-1.25588	down
ko00450	Selenocompound metabolism	0.433483	Em1372g1a	MSTRG.32970	K03341	EC:2.9.1.2	0.107091	-3.22309	down
ko00592	alpha-Linolenic acid metabolism	0.469208	Em0013g542a	MSTRG.18383	K16343	EC:3.1.1.4	0.220354	-2.1821	down
ko03015	mRNA surveillance pathway	0.470208	Em0001g1138a	MSTRG.960	K14326	EC:3.6.4.-	0.291348	-1.77918	down
ko03015	mRNA surveillance pathway	0.470208	Em0006g1104a	MSTRG.10826	K13126	NA	0.0905756	-3.46473	down
ko03015	mRNA surveillance pathway	0.470208	Em0010g776a	MSTRG.15412	K14401	NA	2.212	1.14535	up
ko03015	mRNA surveillance pathway	0.470208	Em0022g462a	MSTRG.27637	K14401	NA	2.92718	1.54951	up
ko03015	mRNA surveillance pathway	0.470208	Em0120g8a	MSTRG.31029	K14401	NA	0.29474	-1.76248	down
ko00565	Ether lipid metabolism	0.486224	Em0013g542a	MSTRG.18383	K16343	EC:3.1.1.4	0.220354	-2.1821	down
ko04145	Phagosome	0.494554	Em0005g239a	MSTRG.8435	K02144	NA	0.146351	-2.7725	down
ko04145	Phagosome	0.494554	Em0018g779a	MSTRG.23599	K07374	NA	0.434425	-1.20282	down
ko04145	Phagosome	0.494554	Em0019g324a	MSTRG.24270	K01365	EC:3.4.22.15	2.43661	1.28488	up
ko04145	Phagosome	0.494554	Em0157g3a	MSTRG.31255	K06493	NA	2.63114	1.39569	up
ko03040	Spliceosome	0.494554	Em0002g833a	MSTRG.3737	K03283	NA	0.437714	-1.19194	down
ko03040	Spliceosome	0.494554	Em0015g1062a	Em0015g1062a	K12874	NA	0.400702	-1.3194	down
ko03040	Spliceosome	0.494554	Em0015g1066a	MSTRG.20768	K12874	NA	0.255079	-1.97099	down
ko03040	Spliceosome	0.494554	Em0017g409a	MSTRG.22484	K03283	NA	inf	inf	up
ko04910	Insulin signaling pathway	0.526437	Em0002g1214a	MSTRG.4068	K07193	NA	2.56466	1.35877	up
ko03050	Proteasome	0.541635	Em0628g2a	MSTRG.32352	K02726	EC:3.4.25.1	0.149002	-2.74659	down
ko04933	AGE-RAGE signaling pathway in diabetic complications	0.583056	Em0784g1a	MSTRG.32579	K02649	NA	0.375399	-1.4135	down
ko03013	RNA transport	0.589974	Em0001g1138a	MSTRG.960	K14326	EC:3.6.4.-	0.291348	-1.77918	down
ko03013	RNA transport	0.589974	Em0006g1104a	MSTRG.10826	K13126	NA	0.0905756	-3.46473	down
ko03013	RNA transport	0.589974	Em0018g107a	MSTRG.22988	K14309	NA	0.0541978	-4.20562	down
ko03030	DNA replication	0.616981	Em0005g1306a	MSTRG.9451	K10754	NA	0.276261	-1.85589	down
ko00310	Lysine degradation	0.635308	Em0005g1117a	MSTRG.9195	K00306	EC:1.5.3.1;EC:1.5.3.7	45.4639	5.50665	up
ko04080	Neuroactive ligand-receptor interaction	0.643007	Em0004g1275a	MSTRG.7892	K04615	NA	0.496848	-1.00912	down
ko04080	Neuroactive ligand-receptor interaction	0.643007	Em0312g2a	Em0312g2a	K04605	NA	0.412543	-1.27738	down
ko04530	Tight junction	0.64704	Em0018g779a	MSTRG.23599	K07374	NA	0.434425	-1.20282	down
ko04010	MAPK signaling pathway	0.674125	Em0002g833a	MSTRG.3737	K03283	NA	0.437714	-1.19194	down
ko04010	MAPK signaling pathway	0.674125	Em0017g409a	MSTRG.22484	K03283	NA	inf	inf	up
ko04010	MAPK signaling pathway	0.674125	Em0657g5a	MSTRG.32390	K12326	NA	-inf	-inf	down
ko04140	Autophagy - animal	0.67579	Em0007g1462a	MSTRG.12333	K07208	NA	2.04279	1.03054	up
ko04140	Autophagy - animal	0.67579	Em0010g274a	MSTRG.15109	K08852	EC:2.7.11.1;EC:3.1.26.-	0.447782	-1.15913	down
ko04140	Autophagy - animal	0.67579	Em0019g324a	MSTRG.24270	K01365	EC:3.4.22.15	2.43661	1.28488	up
ko04140	Autophagy - animal	0.67579	Em0784g1a	MSTRG.32579	K02649	NA	0.375399	-1.4135	down
ko00564	Glycerophospholipid metabolism	0.696036	Em0006g517a	MSTRG.9947	K06129	EC:3.1.1.5	inf	inf	up
ko00564	Glycerophospholipid metabolism	0.696036	Em0013g542a	MSTRG.18383	K16343	EC:3.1.1.4	0.220354	-2.1821	down
ko04512	ECM-receptor interaction	0.709981	Em0157g3a	MSTRG.31255	K06493	NA	2.63114	1.39569	up
ko02010	ABC transporters	0.723893	Em0705g3a	MSTRG.32465	K05678	NA	-inf	-inf	down
ko03460	Fanconi anemia pathway	0.774604	Em0014g704a	MSTRG.19411	K10848	EC:3.1.-.-	3.13965	1.6506	up
ko03460	Fanconi anemia pathway	0.774604	Em0823g1a	MSTRG.32637	K15363	EC:3.1.21.-;EC:3.1.4.1	2.68754	1.42629	up
ko04350	TGF-beta signaling pathway	0.816861	Em0179g6a	MSTRG.31379	K04377	NA	inf	inf	up
ko00983	Drug metabolism - other enzymes	0.834085	Em0001g1335a	MSTRG.1082	K00799	EC:2.5.1.18	7.69231	2.94342	up
ko04810	Regulation of actin cytoskeleton	0.839461	Em0157g3a	MSTRG.31255	K06493	NA	2.63114	1.39569	up
ko04141	Protein processing in endoplasmic reticulum	0.851719	Em0002g833a	MSTRG.3737	K03283	NA	0.437714	-1.19194	down
ko04141	Protein processing in endoplasmic reticulum	0.851719	Em0010g274a	MSTRG.15109	K08852	EC:2.7.11.1;EC:3.1.26.-	0.447782	-1.15913	down
ko04141	Protein processing in endoplasmic reticulum	0.851719	Em0017g409a	MSTRG.22484	K03283	NA	inf	inf	up
ko04330	Notch signaling pathway	0.87256	Em0004g662a	MSTRG.7242	K06059	EC:3.4.24.86	3.22886	1.69102	up
ko04144	Endocytosis	0.881544	Em0002g833a	MSTRG.3737	K03283	NA	0.437714	-1.19194	down
ko04144	Endocytosis	0.881544	Em0014g320a	MSTRG.19533	K17917	NA	0.279461	-1.83928	down
ko04144	Endocytosis	0.881544	Em0017g409a	MSTRG.22484	K03283	NA	inf	inf	up
ko04144	Endocytosis	0.881544	Em0024g356a	Em0024g356a	K11826	NA	2.39142	1.25787	up
ko04510	Focal adhesion	0.897199	Em0157g3a	MSTRG.31255	K06493	NA	2.63114	1.39569	up
ko04070	Phosphatidylinositol signaling system	0.898885	Em0784g1a	MSTRG.32579	K02649	NA	0.375399	-1.4135	down
ko04310	Wnt signaling pathway	0.93852	Em0179g6a	MSTRG.31379	K04377	NA	inf	inf	up
ko00230	Purine metabolism	0.941512	Em0015g473a	Em0015g473a	K01488	EC:3.5.4.4	0.00968498	-6.69003	down
ko03018	RNA degradation	0.947943	Em0006g1104a	MSTRG.10826	K13126	NA	0.0905756	-3.46473	down
ko04068	FoxO signaling pathway	0.998563	Em0784g1a	MSTRG.32579	K02649	NA	0.375399	-1.4135	down
