# Supplementary material for: Freshwater sponge hosts and their green algae symbionts: a tractable model to understand intracellular symbiosis
Source: PeerJ. 2021 Feb 11;9:e10654. doi: 10.7717/peerj.10654 (PMC7882143; doi:10.7717/peerj.10654)
Supplement: Supplemental Information 14 [file peerj-09-10654-s014.xlsx]

## Sheet: Sheet1
Query	GO_hit	GO_identity	GO_evalue	Gene	Symbol	GO_ID	GO_Term	GO_Function	GO_Level
TRINITY_DN10001_c0_g1	UNIPROTKB|F1SG34	33.5	1.4e-47	-	F1SG34	GO:0003723	RNA binding	molecular_function	6
TRINITY_DN10001_c0_g1	UNIPROTKB|F1SG34	33.5	1.4e-47	-	F1SG34	GO:0004000	adenosine deaminase activity	molecular_function	7
TRINITY_DN10001_c0_g1	UNIPROTKB|F1SG34	33.5	1.4e-47	-	F1SG34	GO:0006396	RNA processing	biological_process	9
TRINITY_DN10007_c0_g1	UNIPROTKB|O04998	88.5	1.5e-32	11427840	MTR_6g071070	GO:0004356	glutamate-ammonia ligase activity	molecular_function	8
TRINITY_DN10027_c0_g1	POMBASE|SPAC9.04	43.3	8.1e-07	2538755	Tf2-1	GO:0003887	DNA-directed DNA polymerase activity	molecular_function	8
TRINITY_DN10027_c0_g1	POMBASE|SPAC9.04	43.3	8.1e-07	2538755	Tf2-1	GO:0003964	RNA-directed DNA polymerase activity	molecular_function	8
TRINITY_DN10027_c0_g1	POMBASE|SPAC9.04	43.3	8.1e-07	2538755	Tf2-1	GO:0004190	aspartic-type endopeptidase activity	molecular_function	8
TRINITY_DN10027_c0_g1	POMBASE|SPAC9.04	43.3	8.1e-07	2538755	Tf2-1	GO:0005634	nucleus	cellular_component	6
TRINITY_DN10027_c0_g1	POMBASE|SPAC9.04	43.3	8.1e-07	2538755	Tf2-1	GO:0006310	DNA recombination	biological_process	8
TRINITY_DN10027_c0_g1	POMBASE|SPAC9.04	43.3	8.1e-07	2538755	Tf2-1	GO:0015074	DNA integration	biological_process	8
TRINITY_DN10027_c0_g1	POMBASE|SPAC9.04	43.3	8.1e-07	2538755	Tf2-1	GO:0046872	metal ion binding	molecular_function	6
TRINITY_DN10028_c0_g1	FB|FBgn0010333	79.7	7.6e-89	38146	Rac1	GO:0000902	cell morphogenesis	biological_process	6
TRINITY_DN10028_c0_g1	FB|FBgn0010333	79.7	7.6e-89	38146	Rac1	GO:0001726	ruffle	cellular_component	6
TRINITY_DN10028_c0_g1	FB|FBgn0010333	79.7	7.6e-89	38146	Rac1	GO:0001954	positive regulation of cell-matrix adhesion	biological_process	8
TRINITY_DN10028_c0_g1	FB|FBgn0010333	79.7	7.6e-89	38146	Rac1	GO:0002433	immune response-regulating cell surface receptor signaling pathway involved in phagocytosis	biological_process	5
TRINITY_DN10028_c0_g1	FB|FBgn0010333	79.7	7.6e-89	38146	Rac1	GO:0003924	GTPase activity	molecular_function	9
TRINITY_DN10028_c0_g1	FB|FBgn0010333	79.7	7.6e-89	38146	Rac1	GO:0005515	protein binding	molecular_function	4
TRINITY_DN10028_c0_g1	FB|FBgn0010333	79.7	7.6e-89	38146	Rac1	GO:0005525	GTP binding	molecular_function	8
TRINITY_DN10028_c0_g1	FB|FBgn0010333	79.7	7.6e-89	38146	Rac1	GO:0005737	cytoplasm	cellular_component	5
TRINITY_DN10028_c0_g1	FB|FBgn0010333	79.7	7.6e-89	38146	Rac1	GO:0005856	cytoskeleton	cellular_component	6
TRINITY_DN10028_c0_g1	FB|FBgn0010333	79.7	7.6e-89	38146	Rac1	GO:0005886	plasma membrane	cellular_component	4
TRINITY_DN10028_c0_g1	FB|FBgn0010333	79.7	7.6e-89	38146	Rac1	GO:0006897	endocytosis	biological_process	7
TRINITY_DN10028_c0_g1	FB|FBgn0010333	79.7	7.6e-89	38146	Rac1	GO:0006909	phagocytosis	biological_process	7
TRINITY_DN10028_c0_g1	FB|FBgn0010333	79.7	7.6e-89	38146	Rac1	GO:0006935	chemotaxis	biological_process	5
TRINITY_DN10028_c0_g1	FB|FBgn0010333	79.7	7.6e-89	38146	Rac1	GO:0006974	cellular response to DNA damage stimulus	biological_process	6
TRINITY_DN10028_c0_g1	FB|FBgn0010333	79.7	7.6e-89	38146	Rac1	GO:0007015	actin filament organization	biological_process	6
TRINITY_DN10028_c0_g1	FB|FBgn0010333	79.7	7.6e-89	38146	Rac1	GO:0007017	microtubule-based process	biological_process	4
TRINITY_DN10028_c0_g1	FB|FBgn0010333	79.7	7.6e-89	38146	Rac1	GO:0007164	establishment of tissue polarity	biological_process	5
TRINITY_DN10028_c0_g1	FB|FBgn0010333	79.7	7.6e-89	38146	Rac1	GO:0007254	JNK cascade	biological_process	13
TRINITY_DN10028_c0_g1	FB|FBgn0010333	79.7	7.6e-89	38146	Rac1	GO:0007264	small GTPase mediated signal transduction	biological_process	6
TRINITY_DN10028_c0_g1	FB|FBgn0010333	79.7	7.6e-89	38146	Rac1	GO:0007266	Rho protein signal transduction	biological_process	8
TRINITY_DN10028_c0_g1	FB|FBgn0010333	79.7	7.6e-89	38146	Rac1	GO:0007298	border follicle cell migration	biological_process	10
TRINITY_DN10028_c0_g1	FB|FBgn0010333	79.7	7.6e-89	38146	Rac1	GO:0007390	germ-band shortening	biological_process	6
TRINITY_DN10028_c0_g1	FB|FBgn0010333	79.7	7.6e-89	38146	Rac1	GO:0007391	dorsal closure	biological_process	8
TRINITY_DN10028_c0_g1	FB|FBgn0010333	79.7	7.6e-89	38146	Rac1	GO:0007394	dorsal closure, elongation of leading edge cells	biological_process	8
TRINITY_DN10028_c0_g1	FB|FBgn0010333	79.7	7.6e-89	38146	Rac1	GO:0007395	dorsal closure, spreading of leading edge cells	biological_process	7
TRINITY_DN10028_c0_g1	FB|FBgn0010333	79.7	7.6e-89	38146	Rac1	GO:0007411	axon guidance	biological_process	6
TRINITY_DN10028_c0_g1	FB|FBgn0010333	79.7	7.6e-89	38146	Rac1	GO:0007413	axonal fasciculation	biological_process	6
TRINITY_DN10028_c0_g1	FB|FBgn0010333	79.7	7.6e-89	38146	Rac1	GO:0007419	ventral cord development	biological_process	6
TRINITY_DN10028_c0_g1	FB|FBgn0010333	79.7	7.6e-89	38146	Rac1	GO:0007422	peripheral nervous system development	biological_process	6
TRINITY_DN10028_c0_g1	FB|FBgn0010333	79.7	7.6e-89	38146	Rac1	GO:0007424	open tracheal system development	biological_process	7
TRINITY_DN10028_c0_g1	FB|FBgn0010333	79.7	7.6e-89	38146	Rac1	GO:0007426	tracheal outgrowth, open tracheal system	biological_process	6
TRINITY_DN10028_c0_g1	FB|FBgn0010333	79.7	7.6e-89	38146	Rac1	GO:0007435	salivary gland morphogenesis	biological_process	7
TRINITY_DN10028_c0_g1	FB|FBgn0010333	79.7	7.6e-89	38146	Rac1	GO:0007516	hemocyte development	biological_process	6
TRINITY_DN10028_c0_g1	FB|FBgn0010333	79.7	7.6e-89	38146	Rac1	GO:0007520	myoblast fusion	biological_process	6
TRINITY_DN10028_c0_g1	FB|FBgn0010333	79.7	7.6e-89	38146	Rac1	GO:0007613	memory	biological_process	5
TRINITY_DN10028_c0_g1	FB|FBgn0010333	79.7	7.6e-89	38146	Rac1	GO:0008045	motor neuron axon guidance	biological_process	7
TRINITY_DN10028_c0_g1	FB|FBgn0010333	79.7	7.6e-89	38146	Rac1	GO:0008078	mesodermal cell migration	biological_process	8
TRINITY_DN10028_c0_g1	FB|FBgn0010333	79.7	7.6e-89	38146	Rac1	GO:0008258	head involution	biological_process	6
TRINITY_DN10028_c0_g1	FB|FBgn0010333	79.7	7.6e-89	38146	Rac1	GO:0008283	cell proliferation	biological_process	3
TRINITY_DN10028_c0_g1	FB|FBgn0010333	79.7	7.6e-89	38146	Rac1	GO:0008347	glial cell migration	biological_process	7
TRINITY_DN10028_c0_g1	FB|FBgn0010333	79.7	7.6e-89	38146	Rac1	GO:0010593	negative regulation of lamellipodium assembly	biological_process	11
TRINITY_DN10028_c0_g1	FB|FBgn0010333	79.7	7.6e-89	38146	Rac1	GO:0016028	rhabdomere	cellular_component	6
TRINITY_DN10028_c0_g1	FB|FBgn0010333	79.7	7.6e-89	38146	Rac1	GO:0016199	axon midline choice point recognition	biological_process	7
TRINITY_DN10028_c0_g1	FB|FBgn0010333	79.7	7.6e-89	38146	Rac1	GO:0016203	muscle attachment	biological_process	4
TRINITY_DN10028_c0_g1	FB|FBgn0010333	79.7	7.6e-89	38146	Rac1	GO:0016335	morphogenesis of larval imaginal disc epithelium	biological_process	7
TRINITY_DN10028_c0_g1	FB|FBgn0010333	79.7	7.6e-89	38146	Rac1	GO:0016358	dendrite development	biological_process	8
TRINITY_DN10028_c0_g1	FB|FBgn0010333	79.7	7.6e-89	38146	Rac1	GO:0016477	cell migration	biological_process	6
TRINITY_DN10028_c0_g1	FB|FBgn0010333	79.7	7.6e-89	38146	Rac1	GO:0019897	extrinsic component of plasma membrane	cellular_component	5
TRINITY_DN10028_c0_g1	FB|FBgn0010333	79.7	7.6e-89	38146	Rac1	GO:0019901	protein kinase binding	molecular_function	7
TRINITY_DN10028_c0_g1	FB|FBgn0010333	79.7	7.6e-89	38146	Rac1	GO:0030032	lamellipodium assembly	biological_process	8
TRINITY_DN10028_c0_g1	FB|FBgn0010333	79.7	7.6e-89	38146	Rac1	GO:0030036	actin cytoskeleton organization	biological_process	7
TRINITY_DN10028_c0_g1	FB|FBgn0010333	79.7	7.6e-89	38146	Rac1	GO:0030707	ovarian follicle cell development	biological_process	8
TRINITY_DN10028_c0_g1	FB|FBgn0010333	79.7	7.6e-89	38146	Rac1	GO:0030838	positive regulation of actin filament polymerization	biological_process	9
TRINITY_DN10028_c0_g1	FB|FBgn0010333	79.7	7.6e-89	38146	Rac1	GO:0030866	cortical actin cytoskeleton organization	biological_process	8
TRINITY_DN10028_c0_g1	FB|FBgn0010333	79.7	7.6e-89	38146	Rac1	GO:0031175	neuron projection development	biological_process	7
TRINITY_DN10028_c0_g1	FB|FBgn0010333	79.7	7.6e-89	38146	Rac1	GO:0031532	actin cytoskeleton reorganization	biological_process	8
TRINITY_DN10028_c0_g1	FB|FBgn0010333	79.7	7.6e-89	38146	Rac1	GO:0031941	filamentous actin	cellular_component	4
TRINITY_DN10028_c0_g1	FB|FBgn0010333	79.7	7.6e-89	38146	Rac1	GO:0032147	activation of protein kinase activity	biological_process	12
TRINITY_DN10028_c0_g1	FB|FBgn0010333	79.7	7.6e-89	38146	Rac1	GO:0032794	GTPase activating protein binding	molecular_function	5
TRINITY_DN10028_c0_g1	FB|FBgn0010333	79.7	7.6e-89	38146	Rac1	GO:0034334	adherens junction maintenance	biological_process	7
TRINITY_DN10028_c0_g1	FB|FBgn0010333	79.7	7.6e-89	38146	Rac1	GO:0035010	encapsulation of foreign target	biological_process	5
TRINITY_DN10028_c0_g1	FB|FBgn0010333	79.7	7.6e-89	38146	Rac1	GO:0035011	melanotic encapsulation of foreign target	biological_process	9
TRINITY_DN10028_c0_g1	FB|FBgn0010333	79.7	7.6e-89	38146	Rac1	GO:0035099	hemocyte migration	biological_process	7
TRINITY_DN10028_c0_g1	FB|FBgn0010333	79.7	7.6e-89	38146	Rac1	GO:0035212	cell competition in a multicellular organism	biological_process	4
TRINITY_DN10028_c0_g1	FB|FBgn0010333	79.7	7.6e-89	38146	Rac1	GO:0035320	imaginal disc-derived wing hair site selection	biological_process	8
TRINITY_DN10028_c0_g1	FB|FBgn0010333	79.7	7.6e-89	38146	Rac1	GO:0042052	rhabdomere development	biological_process	6
TRINITY_DN10028_c0_g1	FB|FBgn0010333	79.7	7.6e-89	38146	Rac1	GO:0042067	establishment of ommatidial planar polarity	biological_process	7
TRINITY_DN10028_c0_g1	FB|FBgn0010333	79.7	7.6e-89	38146	Rac1	GO:0043652	engulfment of apoptotic cell	biological_process	9
TRINITY_DN10028_c0_g1	FB|FBgn0010333	79.7	7.6e-89	38146	Rac1	GO:0045216	cell-cell junction organization	biological_process	6
TRINITY_DN10028_c0_g1	FB|FBgn0010333	79.7	7.6e-89	38146	Rac1	GO:0045610	regulation of hemocyte differentiation	biological_process	6
TRINITY_DN10028_c0_g1	FB|FBgn0010333	79.7	7.6e-89	38146	Rac1	GO:0045773	positive regulation of axon extension	biological_process	8
TRINITY_DN10028_c0_g1	FB|FBgn0010333	79.7	7.6e-89	38146	Rac1	GO:0046664	dorsal closure, amnioserosa morphology change	biological_process	6
TRINITY_DN10028_c0_g1	FB|FBgn0010333	79.7	7.6e-89	38146	Rac1	GO:0046843	dorsal appendage formation	biological_process	5
TRINITY_DN10028_c0_g1	FB|FBgn0010333	79.7	7.6e-89	38146	Rac1	GO:0048615	embryonic anterior midgut (ectodermal) morphogenesis	biological_process	8
TRINITY_DN10028_c0_g1	FB|FBgn0010333	79.7	7.6e-89	38146	Rac1	GO:0048675	axon extension	biological_process	7
TRINITY_DN10028_c0_g1	FB|FBgn0010333	79.7	7.6e-89	38146	Rac1	GO:0048747	muscle fiber development	biological_process	8
TRINITY_DN10028_c0_g1	FB|FBgn0010333	79.7	7.6e-89	38146	Rac1	GO:0048812	neuron projection morphogenesis	biological_process	8
TRINITY_DN10028_c0_g1	FB|FBgn0010333	79.7	7.6e-89	38146	Rac1	GO:0048813	dendrite morphogenesis	biological_process	9
TRINITY_DN10028_c0_g1	FB|FBgn0010333	79.7	7.6e-89	38146	Rac1	GO:0048814	regulation of dendrite morphogenesis	biological_process	9
TRINITY_DN10028_c0_g1	FB|FBgn0010333	79.7	7.6e-89	38146	Rac1	GO:0050770	regulation of axonogenesis	biological_process	9
TRINITY_DN10028_c0_g1	FB|FBgn0010333	79.7	7.6e-89	38146	Rac1	GO:0050807	regulation of synapse organization	biological_process	7
TRINITY_DN10028_c0_g1	FB|FBgn0010333	79.7	7.6e-89	38146	Rac1	GO:0050975	sensory perception of touch	biological_process	8
TRINITY_DN10028_c0_g1	FB|FBgn0010333	79.7	7.6e-89	38146	Rac1	GO:0051017	actin filament bundle assembly	biological_process	6
TRINITY_DN10028_c0_g1	FB|FBgn0010333	79.7	7.6e-89	38146	Rac1	GO:0051450	myoblast proliferation	biological_process	4
TRINITY_DN10028_c0_g1	FB|FBgn0010333	79.7	7.6e-89	38146	Rac1	GO:0051491	positive regulation of filopodium assembly	biological_process	11
TRINITY_DN10028_c0_g1	FB|FBgn0010333	79.7	7.6e-89	38146	Rac1	GO:0051726	regulation of cell cycle	biological_process	6
TRINITY_DN10028_c0_g1	FB|FBgn0010333	79.7	7.6e-89	38146	Rac1	GO:0051963	regulation of synapse assembly	biological_process	6
TRINITY_DN10028_c0_g1	FB|FBgn0010333	79.7	7.6e-89	38146	Rac1	GO:0071902	positive regulation of protein serine/threonine kinase activity	biological_process	12
TRINITY_DN10028_c0_g1	FB|FBgn0010333	79.7	7.6e-89	38146	Rac1	GO:0071907	determination of digestive tract left/right asymmetry	biological_process	8
TRINITY_DN10028_c0_g1	FB|FBgn0010333	79.7	7.6e-89	38146	Rac1	GO:0090303	positive regulation of wound healing	biological_process	9
TRINITY_DN10028_c0_g1	FB|FBgn0010333	79.7	7.6e-89	38146	Rac1	GO:0097206	nephrocyte filtration	biological_process	7
TRINITY_DN10028_c0_g1	FB|FBgn0010333	79.7	7.6e-89	38146	Rac1	GO:1902669	positive regulation of axon guidance	biological_process	11
TRINITY_DN10028_c0_g1	FB|FBgn0010333	79.7	7.6e-89	38146	Rac1	GO:1904059	regulation of locomotor rhythm	biological_process	6
TRINITY_DN10034_c0_g1	UNIPROTKB|O22518	96.1	1e-36	548014	O22518	GO:0000028	ribosomal small subunit assembly	biological_process	9
TRINITY_DN10034_c0_g1	UNIPROTKB|O22518	96.1	1e-36	548014	O22518	GO:0000447	endonucleolytic cleavage in ITS1 to separate SSU-rRNA from 5.8S rRNA and LSU-rRNA from tricistronic rRNA transcript (SSU-rRNA, 5.8S rRNA, LSU-rRNA)	biological_process	13
TRINITY_DN10034_c0_g1	UNIPROTKB|O22518	96.1	1e-36	548014	O22518	GO:0000461	endonucleolytic cleavage to generate mature 3'-end of SSU-rRNA from (SSU-rRNA, 5.8S rRNA, LSU-rRNA)	biological_process	13
TRINITY_DN10034_c0_g1	UNIPROTKB|O22518	96.1	1e-36	548014	O22518	GO:0003735	structural constituent of ribosome	molecular_function	4
TRINITY_DN10034_c0_g1	UNIPROTKB|O22518	96.1	1e-36	548014	O22518	GO:0006407	rRNA export from nucleus	biological_process	11
TRINITY_DN10034_c0_g1	UNIPROTKB|O22518	96.1	1e-36	548014	O22518	GO:0006412	translation	biological_process	8
TRINITY_DN10034_c0_g1	UNIPROTKB|O22518	96.1	1e-36	548014	O22518	GO:0022627	cytosolic small ribosomal subunit	cellular_component	8
TRINITY_DN10034_c0_g1	UNIPROTKB|O22518	96.1	1e-36	548014	O22518	GO:0030686	90S preribosome	cellular_component	6
TRINITY_DN10047_c0_g1	UNIPROTKB|Q02375	56.8	4.1e-34	327680	NDUFS4	GO:0001932	regulation of protein phosphorylation	biological_process	9
TRINITY_DN10047_c0_g1	UNIPROTKB|Q02375	56.8	4.1e-34	327680	NDUFS4	GO:0005747	mitochondrial respiratory chain complex I	cellular_component	7
TRINITY_DN10047_c0_g1	UNIPROTKB|Q02375	56.8	4.1e-34	327680	NDUFS4	GO:0007420	brain development	biological_process	6
TRINITY_DN10047_c0_g1	UNIPROTKB|Q02375	56.8	4.1e-34	327680	NDUFS4	GO:0008137	NADH dehydrogenase (ubiquinone) activity	molecular_function	8
TRINITY_DN10047_c0_g1	UNIPROTKB|Q02375	56.8	4.1e-34	327680	NDUFS4	GO:0019933	cAMP-mediated signaling	biological_process	8
TRINITY_DN10047_c0_g1	UNIPROTKB|Q02375	56.8	4.1e-34	327680	NDUFS4	GO:0022900	electron transport chain	biological_process	6
TRINITY_DN10047_c0_g1	UNIPROTKB|Q02375	56.8	4.1e-34	327680	NDUFS4	GO:0032981	mitochondrial respiratory chain complex I assembly	biological_process	9
TRINITY_DN10047_c0_g1	UNIPROTKB|Q02375	56.8	4.1e-34	327680	NDUFS4	GO:0045333	cellular respiration	biological_process	7
TRINITY_DN10047_c0_g1	UNIPROTKB|Q02375	56.8	4.1e-34	327680	NDUFS4	GO:0048146	positive regulation of fibroblast proliferation	biological_process	8
TRINITY_DN10047_c0_g1	UNIPROTKB|Q02375	56.8	4.1e-34	327680	NDUFS4	GO:0051591	response to cAMP	biological_process	8
TRINITY_DN10047_c0_g1	UNIPROTKB|Q02375	56.8	4.1e-34	327680	NDUFS4	GO:0072593	reactive oxygen species metabolic process	biological_process	5
TRINITY_DN10049_c0_g1	RGD|1305301	78.4	7.7e-282	361390	Abce1	GO:0000054	ribosomal subunit export from nucleus	biological_process	8
TRINITY_DN10049_c0_g1	RGD|1305301	78.4	7.7e-282	361390	Abce1	GO:0003674	molecular_function	molecular_function	2
TRINITY_DN10049_c0_g1	RGD|1305301	78.4	7.7e-282	361390	Abce1	GO:0005506	iron ion binding	molecular_function	8
TRINITY_DN10049_c0_g1	RGD|1305301	78.4	7.7e-282	361390	Abce1	GO:0005524	ATP binding	molecular_function	5
TRINITY_DN10049_c0_g1	RGD|1305301	78.4	7.7e-282	361390	Abce1	GO:0005575	cellular_component	cellular_component	2
TRINITY_DN10049_c0_g1	RGD|1305301	78.4	7.7e-282	361390	Abce1	GO:0005737	cytoplasm	cellular_component	5
TRINITY_DN10049_c0_g1	RGD|1305301	78.4	7.7e-282	361390	Abce1	GO:0005739	mitochondrion	cellular_component	6
TRINITY_DN10049_c0_g1	RGD|1305301	78.4	7.7e-282	361390	Abce1	GO:0005829	cytosol	cellular_component	6
TRINITY_DN10049_c0_g1	RGD|1305301	78.4	7.7e-282	361390	Abce1	GO:0005852	eukaryotic translation initiation factor 3 complex	cellular_component	4
TRINITY_DN10049_c0_g1	RGD|1305301	78.4	7.7e-282	361390	Abce1	GO:0006413	translational initiation	biological_process	5
TRINITY_DN10049_c0_g1	RGD|1305301	78.4	7.7e-282	361390	Abce1	GO:0006415	translational termination	biological_process	8
TRINITY_DN10049_c0_g1	RGD|1305301	78.4	7.7e-282	361390	Abce1	GO:0008150	biological_process	biological_process	2
TRINITY_DN10049_c0_g1	RGD|1305301	78.4	7.7e-282	361390	Abce1	GO:0016020	membrane	cellular_component	3
TRINITY_DN10049_c0_g1	RGD|1305301	78.4	7.7e-282	361390	Abce1	GO:0016887	ATPase activity	molecular_function	9
TRINITY_DN10049_c0_g1	RGD|1305301	78.4	7.7e-282	361390	Abce1	GO:0043024	ribosomal small subunit binding	molecular_function	6
TRINITY_DN10049_c0_g1	RGD|1305301	78.4	7.7e-282	361390	Abce1	GO:0060698	endoribonuclease inhibitor activity	molecular_function	7
TRINITY_DN10049_c0_g1	RGD|1305301	78.4	7.7e-282	361390	Abce1	GO:0060702	negative regulation of endoribonuclease activity	biological_process	11
TRINITY_DN10051_c0_g1	UNIPROTKB|B3DL37	93.9	1.6e-37	549742	ufm1	GO:0005634	nucleus	cellular_component	6
TRINITY_DN10051_c0_g1	UNIPROTKB|B3DL37	93.9	1.6e-37	549742	ufm1	GO:0005737	cytoplasm	cellular_component	5
TRINITY_DN10051_c0_g1	UNIPROTKB|B3DL37	93.9	1.6e-37	549742	ufm1	GO:0071569	protein ufmylation	biological_process	11
TRINITY_DN10051_c0_g1	UNIPROTKB|B3DL37	93.9	1.6e-37	549742	ufm1	GO:1990592	protein K69-linked ufmylation	biological_process	13
TRINITY_DN10058_c0_g1	UNIPROTKB|H2UP03	36.9	1.6e-83	-	LOC101075688	GO:0005737	cytoplasm	cellular_component	5
TRINITY_DN10058_c0_g1	UNIPROTKB|H2UP03	36.9	1.6e-83	-	LOC101075688	GO:0008757	S-adenosylmethionine-dependent methyltransferase activity	molecular_function	7
TRINITY_DN10058_c0_g1	UNIPROTKB|H2UP03	36.9	1.6e-83	-	LOC101075688	GO:0032259	methylation	biological_process	4
TRINITY_DN10059_c0_g1	UNIPROTKB|Q486B3	49.2	8.4e-28	-	add1	GO:0004000	adenosine deaminase activity	molecular_function	7
TRINITY_DN10059_c0_g1	UNIPROTKB|Q486B3	49.2	8.4e-28	-	add1	GO:0046085	adenosine metabolic process	biological_process	6
TRINITY_DN10059_c0_g2	UNIPROTKB|Q486B3	50.2	5e-53	-	add1	GO:0004000	adenosine deaminase activity	molecular_function	7
TRINITY_DN10059_c0_g2	UNIPROTKB|Q486B3	50.2	5e-53	-	add1	GO:0046085	adenosine metabolic process	biological_process	6
TRINITY_DN10081_c0_g2	TIGR_CMR|CJE_0542	71.6	1e-26	-	CJE_0542	GO:0003746	translation elongation factor activity	molecular_function	8
TRINITY_DN10081_c0_g2	TIGR_CMR|CJE_0542	71.6	1e-26	-	CJE_0542	GO:0006414	translational elongation	biological_process	8
TRINITY_DN10087_c0_g1	UNIPROTKB|Q8IYY4	45.3	2.2e-08	199221	DZIP1L	GO:0005515	protein binding	molecular_function	4
TRINITY_DN10087_c0_g1	UNIPROTKB|Q8IYY4	45.3	2.2e-08	199221	DZIP1L	GO:0005814	centriole	cellular_component	6
TRINITY_DN10087_c0_g1	UNIPROTKB|Q8IYY4	45.3	2.2e-08	199221	DZIP1L	GO:0036064	ciliary basal body	cellular_component	7
TRINITY_DN10087_c0_g1	UNIPROTKB|Q8IYY4	45.3	2.2e-08	199221	DZIP1L	GO:0046872	metal ion binding	molecular_function	6
TRINITY_DN10109_c0_g1	UNIPROTKB|A7S7Y8	59.9	2.5e-70	5511889	v1g186779	GO:0004364	glutathione transferase activity	molecular_function	6
TRINITY_DN10109_c0_g1	UNIPROTKB|A7S7Y8	59.9	2.5e-70	5511889	v1g186779	GO:0005737	cytoplasm	cellular_component	5
TRINITY_DN10109_c0_g1	UNIPROTKB|A7S7Y8	59.9	2.5e-70	5511889	v1g186779	GO:0006749	glutathione metabolic process	biological_process	8
TRINITY_DN10122_c0_g1	UNIPROTKB|E2R6I0	53.1	2.7e-44	-	PABPN1	GO:0000166	nucleotide binding	molecular_function	5
TRINITY_DN10122_c0_g1	UNIPROTKB|E2R6I0	53.1	2.7e-44	-	PABPN1	GO:0005634	nucleus	cellular_component	6
TRINITY_DN10122_c0_g1	UNIPROTKB|E2R6I0	53.1	2.7e-44	-	PABPN1	GO:0016973	poly(A)+ mRNA export from nucleus	biological_process	12
TRINITY_DN10136_c0_g1	UNIPROTKB|P84173	69.8	1.4e-97	-	PHB	GO:0000122	negative regulation of transcription by RNA polymerase II	biological_process	10
TRINITY_DN10136_c0_g1	UNIPROTKB|P84173	69.8	1.4e-97	-	PHB	GO:0000981	RNA polymerase II transcription factor activity, sequence-specific DNA binding	molecular_function	5
TRINITY_DN10136_c0_g1	UNIPROTKB|P84173	69.8	1.4e-97	-	PHB	GO:0001649	osteoblast differentiation	biological_process	6
TRINITY_DN10136_c0_g1	UNIPROTKB|P84173	69.8	1.4e-97	-	PHB	GO:0001850	complement component C3a binding	molecular_function	6
TRINITY_DN10136_c0_g1	UNIPROTKB|P84173	69.8	1.4e-97	-	PHB	GO:0001851	complement component C3b binding	molecular_function	6
TRINITY_DN10136_c0_g1	UNIPROTKB|P84173	69.8	1.4e-97	-	PHB	GO:0005515	protein binding	molecular_function	4
TRINITY_DN10136_c0_g1	UNIPROTKB|P84173	69.8	1.4e-97	-	PHB	GO:0005654	nucleoplasm	cellular_component	6
TRINITY_DN10136_c0_g1	UNIPROTKB|P84173	69.8	1.4e-97	-	PHB	GO:0005743	mitochondrial inner membrane	cellular_component	6
TRINITY_DN10136_c0_g1	UNIPROTKB|P84173	69.8	1.4e-97	-	PHB	GO:0005769	early endosome	cellular_component	8
TRINITY_DN10136_c0_g1	UNIPROTKB|P84173	69.8	1.4e-97	-	PHB	GO:0005887	integral component of plasma membrane	cellular_component	6
TRINITY_DN10136_c0_g1	UNIPROTKB|P84173	69.8	1.4e-97	-	PHB	GO:0007005	mitochondrion organization	biological_process	6
TRINITY_DN10136_c0_g1	UNIPROTKB|P84173	69.8	1.4e-97	-	PHB	GO:0008022	protein C-terminus binding	molecular_function	5
TRINITY_DN10136_c0_g1	UNIPROTKB|P84173	69.8	1.4e-97	-	PHB	GO:0008285	negative regulation of cell proliferation	biological_process	7
TRINITY_DN10136_c0_g1	UNIPROTKB|P84173	69.8	1.4e-97	-	PHB	GO:0009986	cell surface	cellular_component	4
TRINITY_DN10136_c0_g1	UNIPROTKB|P84173	69.8	1.4e-97	-	PHB	GO:0010944	negative regulation of transcription by competitive promoter binding	biological_process	10
TRINITY_DN10136_c0_g1	UNIPROTKB|P84173	69.8	1.4e-97	-	PHB	GO:0016575	histone deacetylation	biological_process	11
TRINITY_DN10136_c0_g1	UNIPROTKB|P84173	69.8	1.4e-97	-	PHB	GO:0030308	negative regulation of cell growth	biological_process	7
TRINITY_DN10136_c0_g1	UNIPROTKB|P84173	69.8	1.4e-97	-	PHB	GO:0031871	proteinase activated receptor binding	molecular_function	7
TRINITY_DN10136_c0_g1	UNIPROTKB|P84173	69.8	1.4e-97	-	PHB	GO:0042177	negative regulation of protein catabolic process	biological_process	8
TRINITY_DN10136_c0_g1	UNIPROTKB|P84173	69.8	1.4e-97	-	PHB	GO:0042826	histone deacetylase binding	molecular_function	6
TRINITY_DN10136_c0_g1	UNIPROTKB|P84173	69.8	1.4e-97	-	PHB	GO:0043209	myelin sheath	cellular_component	4
TRINITY_DN10136_c0_g1	UNIPROTKB|P84173	69.8	1.4e-97	-	PHB	GO:0044212	transcription regulatory region DNA binding	molecular_function	7
TRINITY_DN10136_c0_g1	UNIPROTKB|P84173	69.8	1.4e-97	-	PHB	GO:0045745	positive regulation of G-protein coupled receptor protein signaling pathway	biological_process	9
TRINITY_DN10136_c0_g1	UNIPROTKB|P84173	69.8	1.4e-97	-	PHB	GO:0045893	positive regulation of transcription, DNA-templated	biological_process	9
TRINITY_DN10136_c0_g1	UNIPROTKB|P84173	69.8	1.4e-97	-	PHB	GO:0045917	positive regulation of complement activation	biological_process	8
TRINITY_DN10136_c0_g1	UNIPROTKB|P84173	69.8	1.4e-97	-	PHB	GO:0050821	protein stabilization	biological_process	6
TRINITY_DN10136_c0_g1	UNIPROTKB|P84173	69.8	1.4e-97	-	PHB	GO:0050847	progesterone receptor signaling pathway	biological_process	7
TRINITY_DN10136_c0_g1	UNIPROTKB|P84173	69.8	1.4e-97	-	PHB	GO:0060766	negative regulation of androgen receptor signaling pathway	biological_process	10
TRINITY_DN10136_c0_g1	UNIPROTKB|P84173	69.8	1.4e-97	-	PHB	GO:0070062	extracellular exosome	cellular_component	7
TRINITY_DN10136_c0_g1	UNIPROTKB|P84173	69.8	1.4e-97	-	PHB	GO:0070373	negative regulation of ERK1 and ERK2 cascade	biological_process	12
TRINITY_DN10136_c0_g1	UNIPROTKB|P84173	69.8	1.4e-97	-	PHB	GO:0070374	positive regulation of ERK1 and ERK2 cascade	biological_process	12
TRINITY_DN10136_c0_g1	UNIPROTKB|P84173	69.8	1.4e-97	-	PHB	GO:0071354	cellular response to interleukin-6	biological_process	8
TRINITY_DN10136_c0_g1	UNIPROTKB|P84173	69.8	1.4e-97	-	PHB	GO:0071897	DNA biosynthetic process	biological_process	8
TRINITY_DN10136_c0_g1	UNIPROTKB|P84173	69.8	1.4e-97	-	PHB	GO:2000323	negative regulation of glucocorticoid receptor signaling pathway	biological_process	10
TRINITY_DN10141_c0_g1	UNIPROTKB|E9FZ29	72.4	1.9e-64	-	DAPPUDRAFT_306455	GO:0004550	nucleoside diphosphate kinase activity	molecular_function	7
TRINITY_DN10141_c0_g1	UNIPROTKB|E9FZ29	72.4	1.9e-64	-	DAPPUDRAFT_306455	GO:0005622	intracellular	cellular_component	4
TRINITY_DN10141_c0_g1	UNIPROTKB|E9FZ29	72.4	1.9e-64	-	DAPPUDRAFT_306455	GO:0006163	purine nucleotide metabolic process	biological_process	9
TRINITY_DN10141_c0_g1	UNIPROTKB|E9FZ29	72.4	1.9e-64	-	DAPPUDRAFT_306455	GO:0006220	pyrimidine nucleotide metabolic process	biological_process	9
TRINITY_DN10141_c0_g1	UNIPROTKB|E9FZ29	72.4	1.9e-64	-	DAPPUDRAFT_306455	GO:0009142	nucleoside triphosphate biosynthetic process	biological_process	9
TRINITY_DN10144_c0_g1	UNIPROTKB|F1ND23	75	1.8e-89	423179	NDUFS3	GO:0005634	nucleus	cellular_component	6
TRINITY_DN10144_c0_g1	UNIPROTKB|F1ND23	75	1.8e-89	423179	NDUFS3	GO:0005747	mitochondrial respiratory chain complex I	cellular_component	7
TRINITY_DN10144_c0_g1	UNIPROTKB|F1ND23	75	1.8e-89	423179	NDUFS3	GO:0008137	NADH dehydrogenase (ubiquinone) activity	molecular_function	8
TRINITY_DN10144_c0_g1	UNIPROTKB|F1ND23	75	1.8e-89	423179	NDUFS3	GO:0021762	substantia nigra development	biological_process	6
TRINITY_DN10144_c0_g1	UNIPROTKB|F1ND23	75	1.8e-89	423179	NDUFS3	GO:0030308	negative regulation of cell growth	biological_process	7
TRINITY_DN10144_c0_g1	UNIPROTKB|F1ND23	75	1.8e-89	423179	NDUFS3	GO:0043209	myelin sheath	cellular_component	4
TRINITY_DN10144_c0_g1	UNIPROTKB|F1ND23	75	1.8e-89	423179	NDUFS3	GO:0055114	oxidation-reduction process	biological_process	4
TRINITY_DN10144_c0_g1	UNIPROTKB|F1ND23	75	1.8e-89	423179	NDUFS3	GO:0072593	reactive oxygen species metabolic process	biological_process	5
TRINITY_DN10144_c0_g1	UNIPROTKB|F1ND23	75	1.8e-89	423179	NDUFS3	GO:2001243	negative regulation of intrinsic apoptotic signaling pathway	biological_process	10
TRINITY_DN10145_c0_g1	UNIPROTKB|C3ZCY8	46.4	3.8e-108	7251466	BRAFLDRAFT_284130	GO:0004185	serine-type carboxypeptidase activity	molecular_function	9
TRINITY_DN10145_c0_g1	UNIPROTKB|C3ZCY8	46.4	3.8e-108	7251466	BRAFLDRAFT_284130	GO:0006508	proteolysis	biological_process	7
TRINITY_DN10145_c0_g1	UNIPROTKB|C3ZCY8	46.4	3.8e-108	7251466	BRAFLDRAFT_284130	GO:0008239	dipeptidyl-peptidase activity	molecular_function	9
TRINITY_DN10165_c0_g1	UNIPROTKB|F1SI25	56.7	7.9e-23	100513451	LRRC57	GO:0070062	extracellular exosome	cellular_component	7
TRINITY_DN10188_c0_g1	FB|FBgn0265298	72.6	1.3e-35	53444	SC35	GO:0000381	regulation of alternative mRNA splicing, via spliceosome	biological_process	10
TRINITY_DN10188_c0_g1	FB|FBgn0265298	72.6	1.3e-35	53444	SC35	GO:0000785	chromatin	cellular_component	6
TRINITY_DN10188_c0_g1	FB|FBgn0265298	72.6	1.3e-35	53444	SC35	GO:0001178	regulation of transcriptional start site selection at RNA polymerase II promoter	biological_process	11
TRINITY_DN10188_c0_g1	FB|FBgn0265298	72.6	1.3e-35	53444	SC35	GO:0003729	mRNA binding	molecular_function	7
TRINITY_DN10188_c0_g1	FB|FBgn0265298	72.6	1.3e-35	53444	SC35	GO:0005515	protein binding	molecular_function	4
TRINITY_DN10188_c0_g1	FB|FBgn0265298	72.6	1.3e-35	53444	SC35	GO:0005634	nucleus	cellular_component	6
TRINITY_DN10188_c0_g1	FB|FBgn0265298	72.6	1.3e-35	53444	SC35	GO:0010468	regulation of gene expression	biological_process	7
TRINITY_DN10188_c0_g1	FB|FBgn0265298	72.6	1.3e-35	53444	SC35	GO:0016607	nuclear speck	cellular_component	8
TRINITY_DN10188_c0_g1	FB|FBgn0265298	72.6	1.3e-35	53444	SC35	GO:0031440	regulation of mRNA 3'-end processing	biological_process	9
TRINITY_DN10188_c0_g1	FB|FBgn0265298	72.6	1.3e-35	53444	SC35	GO:0035062	omega speckle	cellular_component	9
TRINITY_DN10200_c0_g1	UNIPROTKB|F1NNP6	58.9	8.2e-103	423968	GLRX3	GO:0002026	regulation of the force of heart contraction	biological_process	9
TRINITY_DN10200_c0_g1	UNIPROTKB|F1NNP6	58.9	8.2e-103	423968	GLRX3	GO:0009055	electron transfer activity	molecular_function	5
TRINITY_DN10200_c0_g1	UNIPROTKB|F1NNP6	58.9	8.2e-103	423968	GLRX3	GO:0010614	negative regulation of cardiac muscle hypertrophy	biological_process	10
TRINITY_DN10200_c0_g1	UNIPROTKB|F1NNP6	58.9	8.2e-103	423968	GLRX3	GO:0015035	protein disulfide oxidoreductase activity	molecular_function	7
TRINITY_DN10200_c0_g1	UNIPROTKB|F1NNP6	58.9	8.2e-103	423968	GLRX3	GO:0030018	Z disc	cellular_component	5
TRINITY_DN10200_c0_g1	UNIPROTKB|F1NNP6	58.9	8.2e-103	423968	GLRX3	GO:0045454	cell redox homeostasis	biological_process	5
TRINITY_DN10200_c0_g1	UNIPROTKB|F1NNP6	58.9	8.2e-103	423968	GLRX3	GO:0055114	oxidation-reduction process	biological_process	4
TRINITY_DN10200_c0_g1	UNIPROTKB|F1NNP6	58.9	8.2e-103	423968	GLRX3	GO:0070062	extracellular exosome	cellular_component	7
TRINITY_DN10201_c0_g1	UNIPROTKB|B3RIV2	44.3	1.7e-63	6749675	TRIADDRAFT_51380	GO:0005742	mitochondrial outer membrane translocase complex	cellular_component	6
TRINITY_DN10201_c0_g1	UNIPROTKB|B3RIV2	44.3	1.7e-63	6749675	TRIADDRAFT_51380	GO:0030150	protein import into mitochondrial matrix	biological_process	12
TRINITY_DN10201_c0_g2	UNIPROTKB|B3SCT2	52.8	1.6e-29	6759277	TRIADDRAFT_7208	GO:0000002	mitochondrial genome maintenance	biological_process	7
TRINITY_DN10201_c0_g2	UNIPROTKB|B3SCT2	52.8	1.6e-29	6759277	TRIADDRAFT_7208	GO:0003735	structural constituent of ribosome	molecular_function	4
TRINITY_DN10201_c0_g2	UNIPROTKB|B3SCT2	52.8	1.6e-29	6759277	TRIADDRAFT_7208	GO:0005762	mitochondrial large ribosomal subunit	cellular_component	9
TRINITY_DN10204_c0_g1	UNIPROTKB|Q6DDB9	79.4	1.5e-85	448715	pno1	GO:0005730	nucleolus	cellular_component	6
TRINITY_DN10209_c0_g1	ZFIN|ZDB-GENE-040426-1617	45.9	4.6e-53	393493	gstt2	GO:0004364	glutathione transferase activity	molecular_function	6
TRINITY_DN10209_c0_g1	ZFIN|ZDB-GENE-040426-1617	45.9	4.6e-53	393493	gstt2	GO:0005737	cytoplasm	cellular_component	5
TRINITY_DN10209_c0_g1	ZFIN|ZDB-GENE-040426-1617	45.9	4.6e-53	393493	gstt2	GO:0006749	glutathione metabolic process	biological_process	8
TRINITY_DN10214_c0_g2	UNIPROTKB|A7SE42	44.8	7.8e-31	5509602	v1g210850	GO:0000712	resolution of meiotic recombination intermediates	biological_process	7
TRINITY_DN10214_c0_g2	UNIPROTKB|A7SE42	44.8	7.8e-31	5509602	v1g210850	GO:0003697	single-stranded DNA binding	molecular_function	7
TRINITY_DN10214_c0_g2	UNIPROTKB|A7SE42	44.8	7.8e-31	5509602	v1g210850	GO:0008310	single-stranded DNA 3'-5' exodeoxyribonuclease activity	molecular_function	10
TRINITY_DN10214_c0_g2	UNIPROTKB|A7SE42	44.8	7.8e-31	5509602	v1g210850	GO:0090305	nucleic acid phosphodiester bond hydrolysis	biological_process	8
TRINITY_DN10222_c0_g1	WB|WBGene00018018	32.9	2.1e-44	173871	F33G12.6	GO:0003824	catalytic activity	molecular_function	3
TRINITY_DN10230_c0_g1	MGI|MGI:2684937	37.2	4.5e-70	225010	Lclat1	GO:0003841	1-acylglycerol-3-phosphate O-acyltransferase activity	molecular_function	9
TRINITY_DN10230_c0_g1	MGI|MGI:2684937	37.2	4.5e-70	225010	Lclat1	GO:0005783	endoplasmic reticulum	cellular_component	6
TRINITY_DN10230_c0_g1	MGI|MGI:2684937	37.2	4.5e-70	225010	Lclat1	GO:0005829	cytosol	cellular_component	6
TRINITY_DN10230_c0_g1	MGI|MGI:2684937	37.2	4.5e-70	225010	Lclat1	GO:0006629	lipid metabolic process	biological_process	5
TRINITY_DN10230_c0_g1	MGI|MGI:2684937	37.2	4.5e-70	225010	Lclat1	GO:0007275	multicellular organism development	biological_process	4
TRINITY_DN10230_c0_g1	MGI|MGI:2684937	37.2	4.5e-70	225010	Lclat1	GO:0008152	metabolic process	biological_process	3
TRINITY_DN10230_c0_g1	MGI|MGI:2684937	37.2	4.5e-70	225010	Lclat1	GO:0008654	phospholipid biosynthetic process	biological_process	8
TRINITY_DN10230_c0_g1	MGI|MGI:2684937	37.2	4.5e-70	225010	Lclat1	GO:0016020	membrane	cellular_component	3
TRINITY_DN10230_c0_g1	MGI|MGI:2684937	37.2	4.5e-70	225010	Lclat1	GO:0016021	integral component of membrane	cellular_component	5
TRINITY_DN10230_c0_g1	MGI|MGI:2684937	37.2	4.5e-70	225010	Lclat1	GO:0016740	transferase activity	molecular_function	4
TRINITY_DN10230_c0_g1	MGI|MGI:2684937	37.2	4.5e-70	225010	Lclat1	GO:0016746	transferase activity, transferring acyl groups	molecular_function	5
TRINITY_DN10241_c0_g1	DICTYBASE|DDB_G0280843	45.2	9.6e-47	8621793	dgk	GO:0000166	nucleotide binding	molecular_function	5
TRINITY_DN10241_c0_g1	DICTYBASE|DDB_G0280843	45.2	9.6e-47	8621793	dgk	GO:0004138	deoxyguanosine kinase activity	molecular_function	10
TRINITY_DN10241_c0_g1	DICTYBASE|DDB_G0280843	45.2	9.6e-47	8621793	dgk	GO:0005524	ATP binding	molecular_function	5
TRINITY_DN10241_c0_g1	DICTYBASE|DDB_G0280843	45.2	9.6e-47	8621793	dgk	GO:0005737	cytoplasm	cellular_component	5
TRINITY_DN10241_c0_g1	DICTYBASE|DDB_G0280843	45.2	9.6e-47	8621793	dgk	GO:0006139	nucleobase-containing compound metabolic process	biological_process	6
TRINITY_DN10241_c0_g1	DICTYBASE|DDB_G0280843	45.2	9.6e-47	8621793	dgk	GO:0006180	deoxyguanosine salvage	biological_process	10
TRINITY_DN10241_c0_g1	DICTYBASE|DDB_G0280843	45.2	9.6e-47	8621793	dgk	GO:0016301	kinase activity	molecular_function	6
TRINITY_DN10241_c0_g1	DICTYBASE|DDB_G0280843	45.2	9.6e-47	8621793	dgk	GO:0016310	phosphorylation	biological_process	7
TRINITY_DN10241_c0_g1	DICTYBASE|DDB_G0280843	45.2	9.6e-47	8621793	dgk	GO:0016740	transferase activity	molecular_function	4
TRINITY_DN10241_c0_g1	DICTYBASE|DDB_G0280843	45.2	9.6e-47	8621793	dgk	GO:0019206	nucleoside kinase activity	molecular_function	8
TRINITY_DN10246_c0_g1	ZFIN|ZDB-GENE-070615-19	45.2	5.5e-15	797807	zgc:165409	GO:0003676	nucleic acid binding	molecular_function	5
TRINITY_DN10246_c0_g1	ZFIN|ZDB-GENE-070615-19	45.2	5.5e-15	797807	zgc:165409	GO:0008150	biological_process	biological_process	2
TRINITY_DN10252_c0_g1	MGI|MGI:102773	100	1.4e-38	382053	Ces3a	GO:0004771	sterol esterase activity	molecular_function	7
TRINITY_DN10252_c0_g1	MGI|MGI:102773	100	1.4e-38	382053	Ces3a	GO:0004806	triglyceride lipase activity	molecular_function	7
TRINITY_DN10252_c0_g1	MGI|MGI:102773	100	1.4e-38	382053	Ces3a	GO:0005615	extracellular space	cellular_component	4
TRINITY_DN10252_c0_g1	MGI|MGI:102773	100	1.4e-38	382053	Ces3a	GO:0005783	endoplasmic reticulum	cellular_component	6
TRINITY_DN10252_c0_g1	MGI|MGI:102773	100	1.4e-38	382053	Ces3a	GO:0008150	biological_process	biological_process	2
TRINITY_DN10252_c0_g1	MGI|MGI:102773	100	1.4e-38	382053	Ces3a	GO:0016042	lipid catabolic process	biological_process	6
TRINITY_DN10252_c0_g1	MGI|MGI:102773	100	1.4e-38	382053	Ces3a	GO:0016787	hydrolase activity	molecular_function	4
TRINITY_DN10252_c0_g1	MGI|MGI:102773	100	1.4e-38	382053	Ces3a	GO:0052689	carboxylic ester hydrolase activity	molecular_function	6
TRINITY_DN10275_c0_g1	MGI|MGI:102504	91.7	1.3e-260	17708	mt-Co1	GO:0004129	cytochrome-c oxidase activity	molecular_function	6
TRINITY_DN10275_c0_g1	MGI|MGI:102504	91.7	1.3e-260	17708	mt-Co1	GO:0005506	iron ion binding	molecular_function	8
TRINITY_DN10275_c0_g1	MGI|MGI:102504	91.7	1.3e-260	17708	mt-Co1	GO:0005739	mitochondrion	cellular_component	6
TRINITY_DN10275_c0_g1	MGI|MGI:102504	91.7	1.3e-260	17708	mt-Co1	GO:0005743	mitochondrial inner membrane	cellular_component	6
TRINITY_DN10275_c0_g1	MGI|MGI:102504	91.7	1.3e-260	17708	mt-Co1	GO:0005750	mitochondrial respiratory chain complex III	cellular_component	6
TRINITY_DN10275_c0_g1	MGI|MGI:102504	91.7	1.3e-260	17708	mt-Co1	GO:0005751	mitochondrial respiratory chain complex IV	cellular_component	6
TRINITY_DN10275_c0_g1	MGI|MGI:102504	91.7	1.3e-260	17708	mt-Co1	GO:0006123	mitochondrial electron transport, cytochrome c to oxygen	biological_process	10
TRINITY_DN10275_c0_g1	MGI|MGI:102504	91.7	1.3e-260	17708	mt-Co1	GO:0006979	response to oxidative stress	biological_process	5
TRINITY_DN10275_c0_g1	MGI|MGI:102504	91.7	1.3e-260	17708	mt-Co1	GO:0009055	electron transfer activity	molecular_function	5
TRINITY_DN10275_c0_g1	MGI|MGI:102504	91.7	1.3e-260	17708	mt-Co1	GO:0009060	aerobic respiration	biological_process	8
TRINITY_DN10275_c0_g1	MGI|MGI:102504	91.7	1.3e-260	17708	mt-Co1	GO:0015990	electron transport coupled proton transport	biological_process	11
TRINITY_DN10275_c0_g1	MGI|MGI:102504	91.7	1.3e-260	17708	mt-Co1	GO:0016020	membrane	cellular_component	3
TRINITY_DN10275_c0_g1	MGI|MGI:102504	91.7	1.3e-260	17708	mt-Co1	GO:0016021	integral component of membrane	cellular_component	5
TRINITY_DN10275_c0_g1	MGI|MGI:102504	91.7	1.3e-260	17708	mt-Co1	GO:0016491	oxidoreductase activity	molecular_function	4
TRINITY_DN10275_c0_g1	MGI|MGI:102504	91.7	1.3e-260	17708	mt-Co1	GO:0020037	heme binding	molecular_function	6
TRINITY_DN10275_c0_g1	MGI|MGI:102504	91.7	1.3e-260	17708	mt-Co1	GO:0022904	respiratory electron transport chain	biological_process	7
TRINITY_DN10275_c0_g1	MGI|MGI:102504	91.7	1.3e-260	17708	mt-Co1	GO:0045277	respiratory chain complex IV	cellular_component	5
TRINITY_DN10275_c0_g1	MGI|MGI:102504	91.7	1.3e-260	17708	mt-Co1	GO:0046872	metal ion binding	molecular_function	6
TRINITY_DN10275_c0_g1	MGI|MGI:102504	91.7	1.3e-260	17708	mt-Co1	GO:0055114	oxidation-reduction process	biological_process	4
TRINITY_DN10275_c0_g1	MGI|MGI:102504	91.7	1.3e-260	17708	mt-Co1	GO:0070469	respiratory chain	cellular_component	4
TRINITY_DN10275_c1_g1	UNIPROTKB|P00395	90.5	3.5e-65	4512	MT-CO1	GO:0004129	cytochrome-c oxidase activity	molecular_function	6
TRINITY_DN10275_c1_g1	UNIPROTKB|P00395	90.5	3.5e-65	4512	MT-CO1	GO:0005506	iron ion binding	molecular_function	8
TRINITY_DN10275_c1_g1	UNIPROTKB|P00395	90.5	3.5e-65	4512	MT-CO1	GO:0005515	protein binding	molecular_function	4
TRINITY_DN10275_c1_g1	UNIPROTKB|P00395	90.5	3.5e-65	4512	MT-CO1	GO:0005743	mitochondrial inner membrane	cellular_component	6
TRINITY_DN10275_c1_g1	UNIPROTKB|P00395	90.5	3.5e-65	4512	MT-CO1	GO:0005751	mitochondrial respiratory chain complex IV	cellular_component	6
TRINITY_DN10275_c1_g1	UNIPROTKB|P00395	90.5	3.5e-65	4512	MT-CO1	GO:0006123	mitochondrial electron transport, cytochrome c to oxygen	biological_process	10
TRINITY_DN10275_c1_g1	UNIPROTKB|P00395	90.5	3.5e-65	4512	MT-CO1	GO:0006979	response to oxidative stress	biological_process	5
TRINITY_DN10275_c1_g1	UNIPROTKB|P00395	90.5	3.5e-65	4512	MT-CO1	GO:0007568	aging	biological_process	4
TRINITY_DN10275_c1_g1	UNIPROTKB|P00395	90.5	3.5e-65	4512	MT-CO1	GO:0009060	aerobic respiration	biological_process	8
TRINITY_DN10275_c1_g1	UNIPROTKB|P00395	90.5	3.5e-65	4512	MT-CO1	GO:0016021	integral component of membrane	cellular_component	5
TRINITY_DN10275_c1_g1	UNIPROTKB|P00395	90.5	3.5e-65	4512	MT-CO1	GO:0020037	heme binding	molecular_function	6
TRINITY_DN10275_c1_g1	UNIPROTKB|P00395	90.5	3.5e-65	4512	MT-CO1	GO:0021549	cerebellum development	biological_process	5
TRINITY_DN10275_c1_g1	UNIPROTKB|P00395	90.5	3.5e-65	4512	MT-CO1	GO:0045277	respiratory chain complex IV	cellular_component	5
TRINITY_DN10275_c1_g1	UNIPROTKB|P00395	90.5	3.5e-65	4512	MT-CO1	GO:0046688	response to copper ion	biological_process	7
TRINITY_DN10275_c1_g1	UNIPROTKB|P00395	90.5	3.5e-65	4512	MT-CO1	GO:0051602	response to electrical stimulus	biological_process	5
TRINITY_DN10275_c1_g1	UNIPROTKB|P00395	90.5	3.5e-65	4512	MT-CO1	GO:1902600	proton transmembrane transport	biological_process	9
TRINITY_DN10289_c0_g1	RGD|3757	48.2	2.1e-62	24950	Srd5a1	GO:0001655	urogenital system development	biological_process	6
TRINITY_DN10289_c0_g1	RGD|3757	48.2	2.1e-62	24950	Srd5a1	GO:0001889	liver development	biological_process	7
TRINITY_DN10289_c0_g1	RGD|3757	48.2	2.1e-62	24950	Srd5a1	GO:0003865	3-oxo-5-alpha-steroid 4-dehydrogenase activity	molecular_function	7
TRINITY_DN10289_c0_g1	RGD|3757	48.2	2.1e-62	24950	Srd5a1	GO:0005737	cytoplasm	cellular_component	5
TRINITY_DN10289_c0_g1	RGD|3757	48.2	2.1e-62	24950	Srd5a1	GO:0005789	endoplasmic reticulum membrane	cellular_component	5
TRINITY_DN10289_c0_g1	RGD|3757	48.2	2.1e-62	24950	Srd5a1	GO:0006694	steroid biosynthetic process	biological_process	7
TRINITY_DN10289_c0_g1	RGD|3757	48.2	2.1e-62	24950	Srd5a1	GO:0006702	androgen biosynthetic process	biological_process	8
TRINITY_DN10289_c0_g1	RGD|3757	48.2	2.1e-62	24950	Srd5a1	GO:0008209	androgen metabolic process	biological_process	7
TRINITY_DN10289_c0_g1	RGD|3757	48.2	2.1e-62	24950	Srd5a1	GO:0008584	male gonad development	biological_process	7
TRINITY_DN10289_c0_g1	RGD|3757	48.2	2.1e-62	24950	Srd5a1	GO:0009267	cellular response to starvation	biological_process	8
TRINITY_DN10289_c0_g1	RGD|3757	48.2	2.1e-62	24950	Srd5a1	GO:0014070	response to organic cyclic compound	biological_process	6
TRINITY_DN10289_c0_g1	RGD|3757	48.2	2.1e-62	24950	Srd5a1	GO:0014850	response to muscle activity	biological_process	5
TRINITY_DN10289_c0_g1	RGD|3757	48.2	2.1e-62	24950	Srd5a1	GO:0016021	integral component of membrane	cellular_component	5
TRINITY_DN10289_c0_g1	RGD|3757	48.2	2.1e-62	24950	Srd5a1	GO:0016101	diterpenoid metabolic process	biological_process	9
TRINITY_DN10289_c0_g1	RGD|3757	48.2	2.1e-62	24950	Srd5a1	GO:0016491	oxidoreductase activity	molecular_function	4
TRINITY_DN10289_c0_g1	RGD|3757	48.2	2.1e-62	24950	Srd5a1	GO:0021510	spinal cord development	biological_process	6
TRINITY_DN10289_c0_g1	RGD|3757	48.2	2.1e-62	24950	Srd5a1	GO:0021766	hippocampus development	biological_process	5
TRINITY_DN10289_c0_g1	RGD|3757	48.2	2.1e-62	24950	Srd5a1	GO:0021794	thalamus development	biological_process	5
TRINITY_DN10289_c0_g1	RGD|3757	48.2	2.1e-62	24950	Srd5a1	GO:0021854	hypothalamus development	biological_process	5
TRINITY_DN10289_c0_g1	RGD|3757	48.2	2.1e-62	24950	Srd5a1	GO:0021983	pituitary gland development	biological_process	7
TRINITY_DN10289_c0_g1	RGD|3757	48.2	2.1e-62	24950	Srd5a1	GO:0021987	cerebral cortex development	biological_process	5
TRINITY_DN10289_c0_g1	RGD|3757	48.2	2.1e-62	24950	Srd5a1	GO:0030154	cell differentiation	biological_process	5
TRINITY_DN10289_c0_g1	RGD|3757	48.2	2.1e-62	24950	Srd5a1	GO:0030539	male genitalia development	biological_process	7
TRINITY_DN10289_c0_g1	RGD|3757	48.2	2.1e-62	24950	Srd5a1	GO:0030540	female genitalia development	biological_process	7
TRINITY_DN10289_c0_g1	RGD|3757	48.2	2.1e-62	24950	Srd5a1	GO:0031090	organelle membrane	cellular_component	4
TRINITY_DN10289_c0_g1	RGD|3757	48.2	2.1e-62	24950	Srd5a1	GO:0032354	response to follicle-stimulating hormone	biological_process	7
TRINITY_DN10289_c0_g1	RGD|3757	48.2	2.1e-62	24950	Srd5a1	GO:0032355	response to estradiol	biological_process	6
TRINITY_DN10289_c0_g1	RGD|3757	48.2	2.1e-62	24950	Srd5a1	GO:0032869	cellular response to insulin stimulus	biological_process	8
TRINITY_DN10289_c0_g1	RGD|3757	48.2	2.1e-62	24950	Srd5a1	GO:0033218	amide binding	molecular_function	4
TRINITY_DN10289_c0_g1	RGD|3757	48.2	2.1e-62	24950	Srd5a1	GO:0033574	response to testosterone	biological_process	6
TRINITY_DN10289_c0_g1	RGD|3757	48.2	2.1e-62	24950	Srd5a1	GO:0042428	serotonin metabolic process	biological_process	7
TRINITY_DN10289_c0_g1	RGD|3757	48.2	2.1e-62	24950	Srd5a1	GO:0042448	progesterone metabolic process	biological_process	8
TRINITY_DN10289_c0_g1	RGD|3757	48.2	2.1e-62	24950	Srd5a1	GO:0042493	response to drug	biological_process	5
TRINITY_DN10289_c0_g1	RGD|3757	48.2	2.1e-62	24950	Srd5a1	GO:0042747	circadian sleep/wake cycle, REM sleep	biological_process	7
TRINITY_DN10289_c0_g1	RGD|3757	48.2	2.1e-62	24950	Srd5a1	GO:0043025	neuronal cell body	cellular_component	5
TRINITY_DN10289_c0_g1	RGD|3757	48.2	2.1e-62	24950	Srd5a1	GO:0043209	myelin sheath	cellular_component	4
TRINITY_DN10289_c0_g1	RGD|3757	48.2	2.1e-62	24950	Srd5a1	GO:0043231	intracellular membrane-bounded organelle	cellular_component	5
TRINITY_DN10289_c0_g1	RGD|3757	48.2	2.1e-62	24950	Srd5a1	GO:0043627	response to estrogen	biological_process	4
TRINITY_DN10289_c0_g1	RGD|3757	48.2	2.1e-62	24950	Srd5a1	GO:0046661	male sex differentiation	biological_process	6
TRINITY_DN10289_c0_g1	RGD|3757	48.2	2.1e-62	24950	Srd5a1	GO:0047751	cholestenone 5-alpha-reductase activity	molecular_function	8
TRINITY_DN10289_c0_g1	RGD|3757	48.2	2.1e-62	24950	Srd5a1	GO:0048471	perinuclear region of cytoplasm	cellular_component	6
TRINITY_DN10289_c0_g1	RGD|3757	48.2	2.1e-62	24950	Srd5a1	GO:0055114	oxidation-reduction process	biological_process	4
TRINITY_DN10289_c0_g1	RGD|3757	48.2	2.1e-62	24950	Srd5a1	GO:0060348	bone development	biological_process	6
TRINITY_DN10289_c0_g1	RGD|3757	48.2	2.1e-62	24950	Srd5a1	GO:0060416	response to growth hormone	biological_process	7
TRINITY_DN10289_c0_g1	RGD|3757	48.2	2.1e-62	24950	Srd5a1	GO:0060992	response to fungicide	biological_process	6
TRINITY_DN10289_c0_g1	RGD|3757	48.2	2.1e-62	24950	Srd5a1	GO:0070402	NADPH binding	molecular_function	6
TRINITY_DN10289_c0_g1	RGD|3757	48.2	2.1e-62	24950	Srd5a1	GO:0070852	cell body fiber	cellular_component	6
TRINITY_DN10289_c0_g1	RGD|3757	48.2	2.1e-62	24950	Srd5a1	GO:0071320	cellular response to cAMP	biological_process	9
TRINITY_DN10289_c0_g1	RGD|3757	48.2	2.1e-62	24950	Srd5a1	GO:0071363	cellular response to growth factor stimulus	biological_process	7
TRINITY_DN10289_c0_g1	RGD|3757	48.2	2.1e-62	24950	Srd5a1	GO:0071392	cellular response to estradiol stimulus	biological_process	7
TRINITY_DN10289_c0_g1	RGD|3757	48.2	2.1e-62	24950	Srd5a1	GO:0071394	cellular response to testosterone stimulus	biological_process	7
TRINITY_DN10289_c0_g1	RGD|3757	48.2	2.1e-62	24950	Srd5a1	GO:0071407	cellular response to organic cyclic compound	biological_process	7
TRINITY_DN10289_c0_g1	RGD|3757	48.2	2.1e-62	24950	Srd5a1	GO:0071549	cellular response to dexamethasone stimulus	biological_process	7
TRINITY_DN10289_c0_g1	RGD|3757	48.2	2.1e-62	24950	Srd5a1	GO:0071872	cellular response to epinephrine stimulus	biological_process	9
TRINITY_DN102_c0_g2	MGI|MGI:2443569	41.6	1.4e-31	241303	Fam78a	GO:0003674	molecular_function	molecular_function	2
TRINITY_DN102_c0_g2	MGI|MGI:2443569	41.6	1.4e-31	241303	Fam78a	GO:0005575	cellular_component	cellular_component	2
TRINITY_DN102_c0_g2	MGI|MGI:2443569	41.6	1.4e-31	241303	Fam78a	GO:0008150	biological_process	biological_process	2
TRINITY_DN10330_c0_g2	UNIPROTKB|Q9NXG2	38.7	1.1e-11	55623	THUMPD1	GO:0000154	rRNA modification	biological_process	12
TRINITY_DN10330_c0_g2	UNIPROTKB|Q9NXG2	38.7	1.1e-11	55623	THUMPD1	GO:0005515	protein binding	molecular_function	4
TRINITY_DN10330_c0_g2	UNIPROTKB|Q9NXG2	38.7	1.1e-11	55623	THUMPD1	GO:0005654	nucleoplasm	cellular_component	6
TRINITY_DN10341_c0_g4	UNIPROTKB|C3YRN3	57.8	1.1e-27	7248502	BRAFLDRAFT_127523	GO:0005787	signal peptidase complex	cellular_component	7
TRINITY_DN10341_c0_g4	UNIPROTKB|C3YRN3	57.8	1.1e-27	7248502	BRAFLDRAFT_127523	GO:0006465	signal peptide processing	biological_process	8
TRINITY_DN10341_c0_g4	UNIPROTKB|C3YRN3	57.8	1.1e-27	7248502	BRAFLDRAFT_127523	GO:0030176	integral component of endoplasmic reticulum membrane	cellular_component	7
TRINITY_DN10341_c0_g4	UNIPROTKB|C3YRN3	57.8	1.1e-27	7248502	BRAFLDRAFT_127523	GO:0045047	protein targeting to ER	biological_process	12
TRINITY_DN10352_c0_g1	UNIPROTKB|F6QRH3	30.4	1e-27	-	TPRG1L	GO:0042802	identical protein binding	molecular_function	5
TRINITY_DN10352_c0_g1	UNIPROTKB|F6QRH3	30.4	1e-27	-	TPRG1L	GO:0070062	extracellular exosome	cellular_component	7
TRINITY_DN10369_c0_g1	UNIPROTKB|D6R9G1	57.7	3.6e-21	1022	CDK7	GO:0004672	protein kinase activity	molecular_function	7
TRINITY_DN10369_c0_g1	UNIPROTKB|D6R9G1	57.7	3.6e-21	1022	CDK7	GO:0005524	ATP binding	molecular_function	5
TRINITY_DN10369_c0_g1	UNIPROTKB|D6R9G1	57.7	3.6e-21	1022	CDK7	GO:0005634	nucleus	cellular_component	6
TRINITY_DN10369_c0_g1	UNIPROTKB|D6R9G1	57.7	3.6e-21	1022	CDK7	GO:0005737	cytoplasm	cellular_component	5
TRINITY_DN10369_c0_g1	UNIPROTKB|D6R9G1	57.7	3.6e-21	1022	CDK7	GO:0005739	mitochondrion	cellular_component	6
TRINITY_DN10369_c0_g1	UNIPROTKB|D6R9G1	57.7	3.6e-21	1022	CDK7	GO:0006468	protein phosphorylation	biological_process	9
TRINITY_DN10371_c0_g1	UNIPROTKB|P23258	82.7	1.4e-218	7283	TUBG1	GO:0000086	G2/M transition of mitotic cell cycle	biological_process	7
TRINITY_DN10371_c0_g1	UNIPROTKB|P23258	82.7	1.4e-218	7283	TUBG1	GO:0000212	meiotic spindle organization	biological_process	9
TRINITY_DN10371_c0_g1	UNIPROTKB|P23258	82.7	1.4e-218	7283	TUBG1	GO:0000226	microtubule cytoskeleton organization	biological_process	7
TRINITY_DN10371_c0_g1	UNIPROTKB|P23258	82.7	1.4e-218	7283	TUBG1	GO:0000236	mitotic prometaphase	biological_process	6
TRINITY_DN10371_c0_g1	UNIPROTKB|P23258	82.7	1.4e-218	7283	TUBG1	GO:0000242	pericentriolar material	cellular_component	7
TRINITY_DN10371_c0_g1	UNIPROTKB|P23258	82.7	1.4e-218	7283	TUBG1	GO:0000794	condensed nuclear chromosome	cellular_component	8
TRINITY_DN10371_c0_g1	UNIPROTKB|P23258	82.7	1.4e-218	7283	TUBG1	GO:0000930	gamma-tubulin complex	cellular_component	4
TRINITY_DN10371_c0_g1	UNIPROTKB|P23258	82.7	1.4e-218	7283	TUBG1	GO:0003924	GTPase activity	molecular_function	9
TRINITY_DN10371_c0_g1	UNIPROTKB|P23258	82.7	1.4e-218	7283	TUBG1	GO:0005200	structural constituent of cytoskeleton	molecular_function	4
TRINITY_DN10371_c0_g1	UNIPROTKB|P23258	82.7	1.4e-218	7283	TUBG1	GO:0005515	protein binding	molecular_function	4
TRINITY_DN10371_c0_g1	UNIPROTKB|P23258	82.7	1.4e-218	7283	TUBG1	GO:0005525	GTP binding	molecular_function	8
TRINITY_DN10371_c0_g1	UNIPROTKB|P23258	82.7	1.4e-218	7283	TUBG1	GO:0005737	cytoplasm	cellular_component	5
TRINITY_DN10371_c0_g1	UNIPROTKB|P23258	82.7	1.4e-218	7283	TUBG1	GO:0005813	centrosome	cellular_component	7
TRINITY_DN10371_c0_g1	UNIPROTKB|P23258	82.7	1.4e-218	7283	TUBG1	GO:0005814	centriole	cellular_component	6
TRINITY_DN10371_c0_g1	UNIPROTKB|P23258	82.7	1.4e-218	7283	TUBG1	GO:0005827	polar microtubule	cellular_component	9
TRINITY_DN10371_c0_g1	UNIPROTKB|P23258	82.7	1.4e-218	7283	TUBG1	GO:0005829	cytosol	cellular_component	6
TRINITY_DN10371_c0_g1	UNIPROTKB|P23258	82.7	1.4e-218	7283	TUBG1	GO:0005881	cytoplasmic microtubule	cellular_component	8
TRINITY_DN10371_c0_g1	UNIPROTKB|P23258	82.7	1.4e-218	7283	TUBG1	GO:0007020	microtubule nucleation	biological_process	8
TRINITY_DN10371_c0_g1	UNIPROTKB|P23258	82.7	1.4e-218	7283	TUBG1	GO:0010389	regulation of G2/M transition of mitotic cell cycle	biological_process	9
TRINITY_DN10371_c0_g1	UNIPROTKB|P23258	82.7	1.4e-218	7283	TUBG1	GO:0031122	cytoplasmic microtubule organization	biological_process	8
TRINITY_DN10371_c0_g1	UNIPROTKB|P23258	82.7	1.4e-218	7283	TUBG1	GO:0031252	cell leading edge	cellular_component	4
TRINITY_DN10371_c0_g1	UNIPROTKB|P23258	82.7	1.4e-218	7283	TUBG1	GO:0036064	ciliary basal body	cellular_component	7
TRINITY_DN10371_c0_g1	UNIPROTKB|P23258	82.7	1.4e-218	7283	TUBG1	GO:0045177	apical part of cell	cellular_component	4
TRINITY_DN10371_c0_g1	UNIPROTKB|P23258	82.7	1.4e-218	7283	TUBG1	GO:0055037	recycling endosome	cellular_component	8
TRINITY_DN10371_c0_g1	UNIPROTKB|P23258	82.7	1.4e-218	7283	TUBG1	GO:0097711	ciliary basal body-plasma membrane docking	biological_process	6
TRINITY_DN10380_c0_g1	UNIPROTKB|C3XYI0	64.3	1.3e-57	7248005	BRAFLDRAFT_94906	GO:0003713	transcription coactivator activity	molecular_function	5
TRINITY_DN10380_c0_g1	UNIPROTKB|C3XYI0	64.3	1.3e-57	7248005	BRAFLDRAFT_94906	GO:0005634	nucleus	cellular_component	6
TRINITY_DN10380_c0_g1	UNIPROTKB|C3XYI0	64.3	1.3e-57	7248005	BRAFLDRAFT_94906	GO:0005739	mitochondrion	cellular_component	6
TRINITY_DN10380_c0_g1	UNIPROTKB|C3XYI0	64.3	1.3e-57	7248005	BRAFLDRAFT_94906	GO:0005829	cytosol	cellular_component	6
TRINITY_DN10380_c0_g1	UNIPROTKB|C3XYI0	64.3	1.3e-57	7248005	BRAFLDRAFT_94906	GO:0006357	regulation of transcription by RNA polymerase II	biological_process	9
TRINITY_DN10380_c0_g1	UNIPROTKB|C3XYI0	64.3	1.3e-57	7248005	BRAFLDRAFT_94906	GO:0019172	glyoxalase III activity	molecular_function	7
TRINITY_DN10380_c0_g1	UNIPROTKB|C3XYI0	64.3	1.3e-57	7248005	BRAFLDRAFT_94906	GO:0019243	methylglyoxal catabolic process to D-lactate via S-lactoyl-glutathione	biological_process	11
TRINITY_DN10380_c0_g1	UNIPROTKB|C3XYI0	64.3	1.3e-57	7248005	BRAFLDRAFT_94906	GO:0070301	cellular response to hydrogen peroxide	biological_process	8
TRINITY_DN10394_c0_g1	UNIPROTKB|E2QVV4	35.3	1.3e-13	491163	TMEM199	GO:0016021	integral component of membrane	cellular_component	5
TRINITY_DN10396_c0_g4	UNIPROTKB|J9P9X3	40	2.6e-31	-	KIF2A	GO:0000922	spindle pole	cellular_component	6
TRINITY_DN10396_c0_g4	UNIPROTKB|J9P9X3	40	2.6e-31	-	KIF2A	GO:0003777	microtubule motor activity	molecular_function	10
TRINITY_DN10396_c0_g4	UNIPROTKB|J9P9X3	40	2.6e-31	-	KIF2A	GO:0005524	ATP binding	molecular_function	5
TRINITY_DN10396_c0_g4	UNIPROTKB|J9P9X3	40	2.6e-31	-	KIF2A	GO:0005730	nucleolus	cellular_component	6
TRINITY_DN10396_c0_g4	UNIPROTKB|J9P9X3	40	2.6e-31	-	KIF2A	GO:0005813	centrosome	cellular_component	7
TRINITY_DN10396_c0_g4	UNIPROTKB|J9P9X3	40	2.6e-31	-	KIF2A	GO:0005871	kinesin complex	cellular_component	5
TRINITY_DN10396_c0_g4	UNIPROTKB|J9P9X3	40	2.6e-31	-	KIF2A	GO:0005876	spindle microtubule	cellular_component	8
TRINITY_DN10396_c0_g4	UNIPROTKB|J9P9X3	40	2.6e-31	-	KIF2A	GO:0007018	microtubule-based movement	biological_process	5
TRINITY_DN10396_c0_g4	UNIPROTKB|J9P9X3	40	2.6e-31	-	KIF2A	GO:0008017	microtubule binding	molecular_function	7
TRINITY_DN10396_c0_g4	UNIPROTKB|J9P9X3	40	2.6e-31	-	KIF2A	GO:0016020	membrane	cellular_component	3
TRINITY_DN10396_c0_g4	UNIPROTKB|J9P9X3	40	2.6e-31	-	KIF2A	GO:0016887	ATPase activity	molecular_function	9
TRINITY_DN10396_c0_g4	UNIPROTKB|J9P9X3	40	2.6e-31	-	KIF2A	GO:0090307	mitotic spindle assembly	biological_process	10
TRINITY_DN10396_c0_g4	UNIPROTKB|J9P9X3	40	2.6e-31	-	KIF2A	GO:0097228	sperm principal piece	cellular_component	5
TRINITY_DN10398_c0_g1	UNIPROTKB|P24626	65.7	7.9e-07	4342114	Cht3	GO:0004568	chitinase activity	molecular_function	7
TRINITY_DN10398_c0_g1	UNIPROTKB|P24626	65.7	7.9e-07	4342114	Cht3	GO:0006040	amino sugar metabolic process	biological_process	6
TRINITY_DN10398_c0_g1	UNIPROTKB|P24626	65.7	7.9e-07	4342114	Cht3	GO:0008061	chitin binding	molecular_function	5
TRINITY_DN10398_c0_g1	UNIPROTKB|P24626	65.7	7.9e-07	4342114	Cht3	GO:0008843	endochitinase activity	molecular_function	8
TRINITY_DN10398_c0_g1	UNIPROTKB|P24626	65.7	7.9e-07	4342114	Cht3	GO:0016231	beta-N-acetylglucosaminidase activity	molecular_function	9
TRINITY_DN10398_c0_g1	UNIPROTKB|P24626	65.7	7.9e-07	4342114	Cht3	GO:0050832	defense response to fungus	biological_process	8
TRINITY_DN10413_c0_g1	UNIPROTKB|Q2TA25	62.1	2.8e-210	538238	PLK1	GO:0000070	mitotic sister chromatid segregation	biological_process	8
TRINITY_DN10413_c0_g1	UNIPROTKB|Q2TA25	62.1	2.8e-210	538238	PLK1	GO:0000086	G2/M transition of mitotic cell cycle	biological_process	7
TRINITY_DN10413_c0_g1	UNIPROTKB|Q2TA25	62.1	2.8e-210	538238	PLK1	GO:0000122	negative regulation of transcription by RNA polymerase II	biological_process	10
TRINITY_DN10413_c0_g1	UNIPROTKB|Q2TA25	62.1	2.8e-210	538238	PLK1	GO:0000281	mitotic cytokinesis	biological_process	7
TRINITY_DN10413_c0_g1	UNIPROTKB|Q2TA25	62.1	2.8e-210	538238	PLK1	GO:0000776	kinetochore	cellular_component	4
TRINITY_DN10413_c0_g1	UNIPROTKB|Q2TA25	62.1	2.8e-210	538238	PLK1	GO:0000785	chromatin	cellular_component	6
TRINITY_DN10413_c0_g1	UNIPROTKB|Q2TA25	62.1	2.8e-210	538238	PLK1	GO:0000795	synaptonemal complex	cellular_component	8
TRINITY_DN10413_c0_g1	UNIPROTKB|Q2TA25	62.1	2.8e-210	538238	PLK1	GO:0000922	spindle pole	cellular_component	6
TRINITY_DN10413_c0_g1	UNIPROTKB|Q2TA25	62.1	2.8e-210	538238	PLK1	GO:0000942	condensed nuclear chromosome outer kinetochore	cellular_component	5
TRINITY_DN10413_c0_g1	UNIPROTKB|Q2TA25	62.1	2.8e-210	538238	PLK1	GO:0001578	microtubule bundle formation	biological_process	8
TRINITY_DN10413_c0_g1	UNIPROTKB|Q2TA25	62.1	2.8e-210	538238	PLK1	GO:0004674	protein serine/threonine kinase activity	molecular_function	8
TRINITY_DN10413_c0_g1	UNIPROTKB|Q2TA25	62.1	2.8e-210	538238	PLK1	GO:0005524	ATP binding	molecular_function	5
TRINITY_DN10413_c0_g1	UNIPROTKB|Q2TA25	62.1	2.8e-210	538238	PLK1	GO:0005634	nucleus	cellular_component	6
TRINITY_DN10413_c0_g1	UNIPROTKB|Q2TA25	62.1	2.8e-210	538238	PLK1	GO:0005730	nucleolus	cellular_component	6
TRINITY_DN10413_c0_g1	UNIPROTKB|Q2TA25	62.1	2.8e-210	538238	PLK1	GO:0005737	cytoplasm	cellular_component	5
TRINITY_DN10413_c0_g1	UNIPROTKB|Q2TA25	62.1	2.8e-210	538238	PLK1	GO:0005813	centrosome	cellular_component	7
TRINITY_DN10413_c0_g1	UNIPROTKB|Q2TA25	62.1	2.8e-210	538238	PLK1	GO:0005819	spindle	cellular_component	6
TRINITY_DN10413_c0_g1	UNIPROTKB|Q2TA25	62.1	2.8e-210	538238	PLK1	GO:0005876	spindle microtubule	cellular_component	8
TRINITY_DN10413_c0_g1	UNIPROTKB|Q2TA25	62.1	2.8e-210	538238	PLK1	GO:0006468	protein phosphorylation	biological_process	9
TRINITY_DN10413_c0_g1	UNIPROTKB|Q2TA25	62.1	2.8e-210	538238	PLK1	GO:0007094	mitotic spindle assembly checkpoint	biological_process	13
TRINITY_DN10413_c0_g1	UNIPROTKB|Q2TA25	62.1	2.8e-210	538238	PLK1	GO:0008017	microtubule binding	molecular_function	7
TRINITY_DN10413_c0_g1	UNIPROTKB|Q2TA25	62.1	2.8e-210	538238	PLK1	GO:0010800	positive regulation of peptidyl-threonine phosphorylation	biological_process	11
TRINITY_DN10413_c0_g1	UNIPROTKB|Q2TA25	62.1	2.8e-210	538238	PLK1	GO:0010997	anaphase-promoting complex binding	molecular_function	5
TRINITY_DN10413_c0_g1	UNIPROTKB|Q2TA25	62.1	2.8e-210	538238	PLK1	GO:0016321	female meiosis chromosome segregation	biological_process	5
TRINITY_DN10413_c0_g1	UNIPROTKB|Q2TA25	62.1	2.8e-210	538238	PLK1	GO:0016567	protein ubiquitination	biological_process	11
TRINITY_DN10413_c0_g1	UNIPROTKB|Q2TA25	62.1	2.8e-210	538238	PLK1	GO:0018105	peptidyl-serine phosphorylation	biological_process	10
TRINITY_DN10413_c0_g1	UNIPROTKB|Q2TA25	62.1	2.8e-210	538238	PLK1	GO:0019901	protein kinase binding	molecular_function	7
TRINITY_DN10413_c0_g1	UNIPROTKB|Q2TA25	62.1	2.8e-210	538238	PLK1	GO:0030496	midbody	cellular_component	4
TRINITY_DN10413_c0_g1	UNIPROTKB|Q2TA25	62.1	2.8e-210	538238	PLK1	GO:0031572	G2 DNA damage checkpoint	biological_process	8
TRINITY_DN10413_c0_g1	UNIPROTKB|Q2TA25	62.1	2.8e-210	538238	PLK1	GO:0031648	protein destabilization	biological_process	6
TRINITY_DN10413_c0_g1	UNIPROTKB|Q2TA25	62.1	2.8e-210	538238	PLK1	GO:0032436	positive regulation of proteasomal ubiquitin-dependent protein catabolic process	biological_process	12
TRINITY_DN10413_c0_g1	UNIPROTKB|Q2TA25	62.1	2.8e-210	538238	PLK1	GO:0043066	negative regulation of apoptotic process	biological_process	9
TRINITY_DN10413_c0_g1	UNIPROTKB|Q2TA25	62.1	2.8e-210	538238	PLK1	GO:0043393	regulation of protein binding	biological_process	6
TRINITY_DN10413_c0_g1	UNIPROTKB|Q2TA25	62.1	2.8e-210	538238	PLK1	GO:0045143	homologous chromosome segregation	biological_process	7
TRINITY_DN10413_c0_g1	UNIPROTKB|Q2TA25	62.1	2.8e-210	538238	PLK1	GO:0045184	establishment of protein localization	biological_process	6
TRINITY_DN10413_c0_g1	UNIPROTKB|Q2TA25	62.1	2.8e-210	538238	PLK1	GO:0045736	negative regulation of cyclin-dependent protein serine/threonine kinase activity	biological_process	13
TRINITY_DN10413_c0_g1	UNIPROTKB|Q2TA25	62.1	2.8e-210	538238	PLK1	GO:0051233	spindle midzone	cellular_component	6
TRINITY_DN10413_c0_g1	UNIPROTKB|Q2TA25	62.1	2.8e-210	538238	PLK1	GO:0051443	positive regulation of ubiquitin-protein transferase activity	biological_process	12
TRINITY_DN10413_c0_g1	UNIPROTKB|Q2TA25	62.1	2.8e-210	538238	PLK1	GO:0070194	synaptonemal complex disassembly	biological_process	6
TRINITY_DN10413_c0_g1	UNIPROTKB|Q2TA25	62.1	2.8e-210	538238	PLK1	GO:0071168	protein localization to chromatin	biological_process	9
TRINITY_DN10413_c0_g1	UNIPROTKB|Q2TA25	62.1	2.8e-210	538238	PLK1	GO:1901673	regulation of mitotic spindle assembly	biological_process	9
TRINITY_DN10413_c0_g1	UNIPROTKB|Q2TA25	62.1	2.8e-210	538238	PLK1	GO:1904668	positive regulation of ubiquitin protein ligase activity	biological_process	13
TRINITY_DN10420_c0_g1	UNIPROTKB|I1KU21	92.9	3.2e-39	100804251	GLYMA_08G170000	GO:0003924	GTPase activity	molecular_function	9
TRINITY_DN10420_c0_g1	UNIPROTKB|I1KU21	92.9	3.2e-39	100804251	GLYMA_08G170000	GO:0005622	intracellular	cellular_component	4
TRINITY_DN10420_c0_g1	UNIPROTKB|I1KU21	92.9	3.2e-39	100804251	GLYMA_08G170000	GO:0006412	translation	biological_process	8
TRINITY_DN10448_c0_g1	UNIPROTKB|G1TBB5	47	7.2e-06	100348968	HPGD	GO:0005829	cytosol	cellular_component	6
TRINITY_DN10448_c0_g1	UNIPROTKB|G1TBB5	47	7.2e-06	100348968	HPGD	GO:0016404	15-hydroxyprostaglandin dehydrogenase (NAD+) activity	molecular_function	7
TRINITY_DN10475_c0_g1	UNIPROTKB|K7KNT9	97.1	8.7e-27	100811317	GLYMA_05G090100	GO:0003871	5-methyltetrahydropteroyltriglutamate-homocysteine S-methyltransferase activity	molecular_function	8
TRINITY_DN10475_c0_g1	UNIPROTKB|K7KNT9	97.1	8.7e-27	100811317	GLYMA_05G090100	GO:0005576	extracellular region	cellular_component	3
TRINITY_DN10475_c0_g1	UNIPROTKB|K7KNT9	97.1	8.7e-27	100811317	GLYMA_05G090100	GO:0005829	cytosol	cellular_component	6
TRINITY_DN10475_c0_g1	UNIPROTKB|K7KNT9	97.1	8.7e-27	100811317	GLYMA_05G090100	GO:0008705	methionine synthase activity	molecular_function	8
TRINITY_DN10475_c0_g1	UNIPROTKB|K7KNT9	97.1	8.7e-27	100811317	GLYMA_05G090100	GO:0050667	homocysteine metabolic process	biological_process	10
TRINITY_DN10475_c0_g4	UNIPROTKB|B9HQI3	91.8	6.6e-33	7478605	POPTR_0009s15490g	GO:0003871	5-methyltetrahydropteroyltriglutamate-homocysteine S-methyltransferase activity	molecular_function	8
TRINITY_DN10475_c0_g4	UNIPROTKB|B9HQI3	91.8	6.6e-33	7478605	POPTR_0009s15490g	GO:0005576	extracellular region	cellular_component	3
TRINITY_DN10475_c0_g4	UNIPROTKB|B9HQI3	91.8	6.6e-33	7478605	POPTR_0009s15490g	GO:0005829	cytosol	cellular_component	6
TRINITY_DN10475_c0_g4	UNIPROTKB|B9HQI3	91.8	6.6e-33	7478605	POPTR_0009s15490g	GO:0008705	methionine synthase activity	molecular_function	8
TRINITY_DN10475_c0_g4	UNIPROTKB|B9HQI3	91.8	6.6e-33	7478605	POPTR_0009s15490g	GO:0050667	homocysteine metabolic process	biological_process	10
TRINITY_DN10487_c0_g2	ZFIN|ZDB-GENE-030131-4900	38.9	2.5e-26	326701	ssr4	GO:0005783	endoplasmic reticulum	cellular_component	6
TRINITY_DN10487_c0_g2	ZFIN|ZDB-GENE-030131-4900	38.9	2.5e-26	326701	ssr4	GO:0016020	membrane	cellular_component	3
TRINITY_DN10487_c0_g2	ZFIN|ZDB-GENE-030131-4900	38.9	2.5e-26	326701	ssr4	GO:0016021	integral component of membrane	cellular_component	5
TRINITY_DN10487_c0_g2	ZFIN|ZDB-GENE-030131-4900	38.9	2.5e-26	326701	ssr4	GO:0071391	cellular response to estrogen stimulus	biological_process	5
TRINITY_DN10493_c0_g1	ZFIN|ZDB-GENE-040426-1032	37.5	1.3e-94	-	siae	GO:0003674	molecular_function	molecular_function	2
TRINITY_DN10493_c0_g1	ZFIN|ZDB-GENE-040426-1032	37.5	1.3e-94	-	siae	GO:0005575	cellular_component	cellular_component	2
TRINITY_DN10493_c0_g1	ZFIN|ZDB-GENE-040426-1032	37.5	1.3e-94	-	siae	GO:0008150	biological_process	biological_process	2
TRINITY_DN10512_c0_g1	UNIPROTKB|A7RJV0	81	8.9e-57	5520575	v1g159589	GO:0003735	structural constituent of ribosome	molecular_function	4
TRINITY_DN10519_c0_g1	UNIPROTKB|F4P184	64.1	2.2e-16	18236518	BATDEDRAFT_10993	GO:0002181	cytoplasmic translation	biological_process	9
TRINITY_DN10519_c0_g1	UNIPROTKB|F4P184	64.1	2.2e-16	18236518	BATDEDRAFT_10993	GO:0003735	structural constituent of ribosome	molecular_function	4
TRINITY_DN10519_c0_g1	UNIPROTKB|F4P184	64.1	2.2e-16	18236518	BATDEDRAFT_10993	GO:0022625	cytosolic large ribosomal subunit	cellular_component	8
TRINITY_DN10519_c0_g1	UNIPROTKB|F4P184	64.1	2.2e-16	18236518	BATDEDRAFT_10993	GO:0030295	protein kinase activator activity	molecular_function	7
TRINITY_DN10519_c0_g1	UNIPROTKB|F4P184	64.1	2.2e-16	18236518	BATDEDRAFT_10993	GO:0030687	preribosome, large subunit precursor	cellular_component	6
TRINITY_DN10519_c0_g1	UNIPROTKB|F4P184	64.1	2.2e-16	18236518	BATDEDRAFT_10993	GO:0045860	positive regulation of protein kinase activity	biological_process	11
TRINITY_DN10519_c0_g1	UNIPROTKB|F4P184	64.1	2.2e-16	18236518	BATDEDRAFT_10993	GO:0070180	large ribosomal subunit rRNA binding	molecular_function	8
TRINITY_DN10522_c0_g1	UNIPROTKB|P14755	48.2	1.2e-80	100009108	CRYL1	GO:0005829	cytosol	cellular_component	6
TRINITY_DN10522_c0_g1	UNIPROTKB|P14755	48.2	1.2e-80	100009108	CRYL1	GO:0042803	protein homodimerization activity	molecular_function	6
TRINITY_DN10522_c0_g1	UNIPROTKB|P14755	48.2	1.2e-80	100009108	CRYL1	GO:0050104	L-gulonate 3-dehydrogenase activity	molecular_function	7
TRINITY_DN10522_c0_g1	UNIPROTKB|P14755	48.2	1.2e-80	100009108	CRYL1	GO:0070403	NAD+ binding	molecular_function	6
TRINITY_DN10524_c0_g2	UNIPROTKB|H9GDE4	45.8	2.7e-36	-	KIF20B	GO:0003777	microtubule motor activity	molecular_function	10
TRINITY_DN10524_c0_g2	UNIPROTKB|H9GDE4	45.8	2.7e-36	-	KIF20B	GO:0005871	kinesin complex	cellular_component	5
TRINITY_DN10524_c0_g2	UNIPROTKB|H9GDE4	45.8	2.7e-36	-	KIF20B	GO:0007018	microtubule-based movement	biological_process	5
TRINITY_DN10524_c0_g2	UNIPROTKB|H9GDE4	45.8	2.7e-36	-	KIF20B	GO:0016887	ATPase activity	molecular_function	9
TRINITY_DN10524_c0_g3	UNIPROTKB|W4Y4D1	32.1	2.9e-37	-	Sp-Kif20A	GO:0003777	microtubule motor activity	molecular_function	10
TRINITY_DN10524_c0_g3	UNIPROTKB|W4Y4D1	32.1	2.9e-37	-	Sp-Kif20A	GO:0005871	kinesin complex	cellular_component	5
TRINITY_DN10524_c0_g3	UNIPROTKB|W4Y4D1	32.1	2.9e-37	-	Sp-Kif20A	GO:0007018	microtubule-based movement	biological_process	5
TRINITY_DN10524_c0_g3	UNIPROTKB|W4Y4D1	32.1	2.9e-37	-	Sp-Kif20A	GO:0016887	ATPase activity	molecular_function	9
TRINITY_DN10579_c0_g1	TIGR_CMR|BA_0680	36.7	3e-30	-	BA_0680	GO:0008152	metabolic process	biological_process	3
TRINITY_DN10579_c0_g1	TIGR_CMR|BA_0680	36.7	3e-30	-	BA_0680	GO:0016491	oxidoreductase activity	molecular_function	4
TRINITY_DN10582_c0_g2	UNIPROTKB|P68835	99.1	2.7e-64	-	P68835	GO:0005515	protein binding	molecular_function	4
TRINITY_DN10582_c0_g3	UNIPROTKB|P03070	98.3	4.8e-28	29031019	P03070	GO:0003690	double-stranded DNA binding	molecular_function	7
TRINITY_DN10582_c0_g3	UNIPROTKB|P03070	98.3	4.8e-28	29031019	P03070	GO:0003697	single-stranded DNA binding	molecular_function	7
TRINITY_DN10582_c0_g3	UNIPROTKB|P03070	98.3	4.8e-28	29031019	P03070	GO:0005515	protein binding	molecular_function	4
TRINITY_DN10582_c0_g3	UNIPROTKB|P03070	98.3	4.8e-28	29031019	P03070	GO:0006268	DNA unwinding involved in DNA replication	biological_process	10
TRINITY_DN10582_c0_g3	UNIPROTKB|P03070	98.3	4.8e-28	29031019	P03070	GO:0039686	bidirectional double-stranded viral DNA replication	biological_process	9
TRINITY_DN10582_c0_g3	UNIPROTKB|P03070	98.3	4.8e-28	29031019	P03070	GO:0039693	viral DNA genome replication	biological_process	8
TRINITY_DN10582_c0_g4	UNIPROTKB|P03070	100	7.1e-14	29031019	P03070	GO:0003690	double-stranded DNA binding	molecular_function	7
TRINITY_DN10582_c0_g4	UNIPROTKB|P03070	100	7.1e-14	29031019	P03070	GO:0003697	single-stranded DNA binding	molecular_function	7
TRINITY_DN10582_c0_g4	UNIPROTKB|P03070	100	7.1e-14	29031019	P03070	GO:0005515	protein binding	molecular_function	4
TRINITY_DN10582_c0_g4	UNIPROTKB|P03070	100	7.1e-14	29031019	P03070	GO:0006268	DNA unwinding involved in DNA replication	biological_process	10
TRINITY_DN10582_c0_g4	UNIPROTKB|P03070	100	7.1e-14	29031019	P03070	GO:0039686	bidirectional double-stranded viral DNA replication	biological_process	9
TRINITY_DN10582_c0_g4	UNIPROTKB|P03070	100	7.1e-14	29031019	P03070	GO:0039693	viral DNA genome replication	biological_process	8
TRINITY_DN10583_c0_g1	UNIPROTKB|H2T7G0	61.7	3.7e-66	-	H2T7G0	GO:0000175	3'-5'-exoribonuclease activity	molecular_function	9
TRINITY_DN10583_c0_g1	UNIPROTKB|H2T7G0	61.7	3.7e-66	-	H2T7G0	GO:0005739	mitochondrion	cellular_component	6
TRINITY_DN10583_c0_g1	UNIPROTKB|H2T7G0	61.7	3.7e-66	-	H2T7G0	GO:0090305	nucleic acid phosphodiester bond hydrolysis	biological_process	8
TRINITY_DN10584_c0_g1	UNIPROTKB|E2R7R4	37.1	3.6e-56	479103	PDS5A	GO:0000785	chromatin	cellular_component	6
TRINITY_DN10584_c0_g1	UNIPROTKB|E2R7R4	37.1	3.6e-56	479103	PDS5A	GO:0005654	nucleoplasm	cellular_component	6
TRINITY_DN10584_c0_g1	UNIPROTKB|E2R7R4	37.1	3.6e-56	479103	PDS5A	GO:0005886	plasma membrane	cellular_component	4
TRINITY_DN10584_c0_g1	UNIPROTKB|E2R7R4	37.1	3.6e-56	479103	PDS5A	GO:0007064	mitotic sister chromatid cohesion	biological_process	6
TRINITY_DN10584_c0_g1	UNIPROTKB|E2R7R4	37.1	3.6e-56	479103	PDS5A	GO:0008156	negative regulation of DNA replication	biological_process	10
TRINITY_DN10586_c0_g1	UNIPROTKB|Q9Y221	72.6	6e-75	51388	NIP7	GO:0005515	protein binding	molecular_function	4
TRINITY_DN10586_c0_g1	UNIPROTKB|Q9Y221	72.6	6e-75	51388	NIP7	GO:0005634	nucleus	cellular_component	6
TRINITY_DN10586_c0_g1	UNIPROTKB|Q9Y221	72.6	6e-75	51388	NIP7	GO:0005730	nucleolus	cellular_component	6
TRINITY_DN10586_c0_g1	UNIPROTKB|Q9Y221	72.6	6e-75	51388	NIP7	GO:0005737	cytoplasm	cellular_component	5
TRINITY_DN10586_c0_g1	UNIPROTKB|Q9Y221	72.6	6e-75	51388	NIP7	GO:0042255	ribosome assembly	biological_process	9
TRINITY_DN1059_c0_g1	MGI|MGI:95526	100	1.6e-21	99571	Fgg	GO:0002250	adaptive immune response	biological_process	5
TRINITY_DN1059_c0_g1	MGI|MGI:95526	100	1.6e-21	99571	Fgg	GO:0002376	immune system process	biological_process	3
TRINITY_DN1059_c0_g1	MGI|MGI:95526	100	1.6e-21	99571	Fgg	GO:0005102	receptor binding	molecular_function	5
TRINITY_DN1059_c0_g1	MGI|MGI:95526	100	1.6e-21	99571	Fgg	GO:0005198	structural molecule activity	molecular_function	3
TRINITY_DN1059_c0_g1	MGI|MGI:95526	100	1.6e-21	99571	Fgg	GO:0005576	extracellular region	cellular_component	3
TRINITY_DN1059_c0_g1	MGI|MGI:95526	100	1.6e-21	99571	Fgg	GO:0005577	fibrinogen complex	cellular_component	4
TRINITY_DN1059_c0_g1	MGI|MGI:95526	100	1.6e-21	99571	Fgg	GO:0005615	extracellular space	cellular_component	4
TRINITY_DN1059_c0_g1	MGI|MGI:95526	100	1.6e-21	99571	Fgg	GO:0005737	cytoplasm	cellular_component	5
TRINITY_DN1059_c0_g1	MGI|MGI:95526	100	1.6e-21	99571	Fgg	GO:0005938	cell cortex	cellular_component	7
TRINITY_DN1059_c0_g1	MGI|MGI:95526	100	1.6e-21	99571	Fgg	GO:0007160	cell-matrix adhesion	biological_process	6
TRINITY_DN1059_c0_g1	MGI|MGI:95526	100	1.6e-21	99571	Fgg	GO:0007165	signal transduction	biological_process	4
TRINITY_DN1059_c0_g1	MGI|MGI:95526	100	1.6e-21	99571	Fgg	GO:0007596	blood coagulation	biological_process	7
TRINITY_DN1059_c0_g1	MGI|MGI:95526	100	1.6e-21	99571	Fgg	GO:0007599	hemostasis	biological_process	6
TRINITY_DN1059_c0_g1	MGI|MGI:95526	100	1.6e-21	99571	Fgg	GO:0009306	protein secretion	biological_process	10
TRINITY_DN1059_c0_g1	MGI|MGI:95526	100	1.6e-21	99571	Fgg	GO:0009897	external side of plasma membrane	cellular_component	5
TRINITY_DN1059_c0_g1	MGI|MGI:95526	100	1.6e-21	99571	Fgg	GO:0009986	cell surface	cellular_component	4
TRINITY_DN1059_c0_g1	MGI|MGI:95526	100	1.6e-21	99571	Fgg	GO:0030168	platelet activation	biological_process	5
TRINITY_DN1059_c0_g1	MGI|MGI:95526	100	1.6e-21	99571	Fgg	GO:0030674	protein binding, bridging	molecular_function	5
TRINITY_DN1059_c0_g1	MGI|MGI:95526	100	1.6e-21	99571	Fgg	GO:0031091	platelet alpha granule	cellular_component	9
TRINITY_DN1059_c0_g1	MGI|MGI:95526	100	1.6e-21	99571	Fgg	GO:0031639	plasminogen activation	biological_process	10
TRINITY_DN1059_c0_g1	MGI|MGI:95526	100	1.6e-21	99571	Fgg	GO:0034116	positive regulation of heterotypic cell-cell adhesion	biological_process	8
TRINITY_DN1059_c0_g1	MGI|MGI:95526	100	1.6e-21	99571	Fgg	GO:0042730	fibrinolysis	biological_process	9
TRINITY_DN1059_c0_g1	MGI|MGI:95526	100	1.6e-21	99571	Fgg	GO:0042803	protein homodimerization activity	molecular_function	6
TRINITY_DN1059_c0_g1	MGI|MGI:95526	100	1.6e-21	99571	Fgg	GO:0045087	innate immune response	biological_process	5
TRINITY_DN1059_c0_g1	MGI|MGI:95526	100	1.6e-21	99571	Fgg	GO:0045907	positive regulation of vasoconstriction	biological_process	10
TRINITY_DN1059_c0_g1	MGI|MGI:95526	100	1.6e-21	99571	Fgg	GO:0045921	positive regulation of exocytosis	biological_process	8
TRINITY_DN1059_c0_g1	MGI|MGI:95526	100	1.6e-21	99571	Fgg	GO:0046872	metal ion binding	molecular_function	6
TRINITY_DN1059_c0_g1	MGI|MGI:95526	100	1.6e-21	99571	Fgg	GO:0050714	positive regulation of protein secretion	biological_process	10
TRINITY_DN1059_c0_g1	MGI|MGI:95526	100	1.6e-21	99571	Fgg	GO:0050839	cell adhesion molecule binding	molecular_function	5
TRINITY_DN1059_c0_g1	MGI|MGI:95526	100	1.6e-21	99571	Fgg	GO:0051258	protein polymerization	biological_process	8
TRINITY_DN1059_c0_g1	MGI|MGI:95526	100	1.6e-21	99571	Fgg	GO:0051592	response to calcium ion	biological_process	7
TRINITY_DN1059_c0_g1	MGI|MGI:95526	100	1.6e-21	99571	Fgg	GO:0070374	positive regulation of ERK1 and ERK2 cascade	biological_process	12
TRINITY_DN1059_c0_g1	MGI|MGI:95526	100	1.6e-21	99571	Fgg	GO:0070527	platelet aggregation	biological_process	7
TRINITY_DN1059_c0_g1	MGI|MGI:95526	100	1.6e-21	99571	Fgg	GO:0072378	blood coagulation, fibrin clot formation	biological_process	8
TRINITY_DN1059_c0_g1	MGI|MGI:95526	100	1.6e-21	99571	Fgg	GO:0072562	blood microparticle	cellular_component	4
TRINITY_DN1059_c0_g1	MGI|MGI:95526	100	1.6e-21	99571	Fgg	GO:0090277	positive regulation of peptide hormone secretion	biological_process	10
TRINITY_DN1059_c0_g1	MGI|MGI:95526	100	1.6e-21	99571	Fgg	GO:0090331	negative regulation of platelet aggregation	biological_process	10
TRINITY_DN1059_c0_g1	MGI|MGI:95526	100	1.6e-21	99571	Fgg	GO:1902042	negative regulation of extrinsic apoptotic signaling pathway via death domain receptors	biological_process	11
TRINITY_DN1059_c0_g1	MGI|MGI:95526	100	1.6e-21	99571	Fgg	GO:2000352	negative regulation of endothelial cell apoptotic process	biological_process	11
TRINITY_DN10609_c0_g1	UNIPROTKB|B3RYE1	41.2	6.2e-65	6753686	TRIADDRAFT_56526	GO:0000462	maturation of SSU-rRNA from tricistronic rRNA transcript (SSU-rRNA, 5.8S rRNA, LSU-rRNA)	biological_process	13
TRINITY_DN10609_c0_g1	UNIPROTKB|B3RYE1	41.2	6.2e-65	6753686	TRIADDRAFT_56526	GO:0003735	structural constituent of ribosome	molecular_function	4
TRINITY_DN10609_c0_g1	UNIPROTKB|B3RYE1	41.2	6.2e-65	6753686	TRIADDRAFT_56526	GO:0005763	mitochondrial small ribosomal subunit	cellular_component	9
TRINITY_DN10609_c0_g1	UNIPROTKB|B3RYE1	41.2	6.2e-65	6753686	TRIADDRAFT_56526	GO:0006412	translation	biological_process	8
TRINITY_DN10615_c0_g1	TAIR|locus:2057584	70.8	6.6e-19	817950	DRM2	GO:0005634	nucleus	cellular_component	6
TRINITY_DN10615_c0_g1	TAIR|locus:2057584	70.8	6.6e-19	817950	DRM2	GO:0007275	multicellular organism development	biological_process	4
TRINITY_DN10620_c0_g1	UNIPROTKB|P45456	97.5	1.2e-108	-	ICL1	GO:0004451	isocitrate lyase activity	molecular_function	7
TRINITY_DN10620_c0_g1	UNIPROTKB|P45456	97.5	1.2e-108	-	ICL1	GO:0006097	glyoxylate cycle	biological_process	7
TRINITY_DN10620_c0_g1	UNIPROTKB|P45456	97.5	1.2e-108	-	ICL1	GO:0009514	glyoxysome	cellular_component	8
TRINITY_DN10620_c0_g1	UNIPROTKB|P45456	97.5	1.2e-108	-	ICL1	GO:0046912	transferase activity, transferring acyl groups, acyl groups converted into alkyl on transfer	molecular_function	6
TRINITY_DN10623_c0_g1	UNIPROTKB|C3XWK4	54	7e-69	7255304	BRAFLDRAFT_268698	GO:0004843	thiol-dependent ubiquitin-specific protease activity	molecular_function	10
TRINITY_DN10623_c0_g1	UNIPROTKB|C3XWK4	54	7e-69	7255304	BRAFLDRAFT_268698	GO:0005737	cytoplasm	cellular_component	5
TRINITY_DN10623_c0_g1	UNIPROTKB|C3XWK4	54	7e-69	7255304	BRAFLDRAFT_268698	GO:0016579	protein deubiquitination	biological_process	9
TRINITY_DN10631_c0_g1	RGD|1563597	61.2	1.3e-33	498095	Tctex1d2	GO:0000922	spindle pole	cellular_component	6
TRINITY_DN10631_c0_g1	RGD|1563597	61.2	1.3e-33	498095	Tctex1d2	GO:0005813	centrosome	cellular_component	7
TRINITY_DN10631_c0_g1	RGD|1563597	61.2	1.3e-33	498095	Tctex1d2	GO:0005868	cytoplasmic dynein complex	cellular_component	6
TRINITY_DN10631_c0_g1	RGD|1563597	61.2	1.3e-33	498095	Tctex1d2	GO:0005930	axoneme	cellular_component	6
TRINITY_DN10631_c0_g1	RGD|1563597	61.2	1.3e-33	498095	Tctex1d2	GO:0031021	interphase microtubule organizing center	cellular_component	7
TRINITY_DN10631_c0_g1	RGD|1563597	61.2	1.3e-33	498095	Tctex1d2	GO:0045505	dynein intermediate chain binding	molecular_function	5
TRINITY_DN10631_c0_g1	RGD|1563597	61.2	1.3e-33	498095	Tctex1d2	GO:0060271	cilium assembly	biological_process	7
TRINITY_DN10631_c0_g1	RGD|1563597	61.2	1.3e-33	498095	Tctex1d2	GO:0097546	ciliary base	cellular_component	5
TRINITY_DN10631_c0_g1	RGD|1563597	61.2	1.3e-33	498095	Tctex1d2	GO:1902017	regulation of cilium assembly	biological_process	10
TRINITY_DN10631_c0_g1	RGD|1563597	61.2	1.3e-33	498095	Tctex1d2	GO:1905799	regulation of intraciliary retrograde transport	biological_process	8
TRINITY_DN10640_c0_g1	UNIPROTKB|J9NYX7	33	8.6e-77	-	OSGIN2	GO:0016491	oxidoreductase activity	molecular_function	4
TRINITY_DN10640_c0_g1	UNIPROTKB|J9NYX7	33	8.6e-77	-	OSGIN2	GO:0055114	oxidation-reduction process	biological_process	4
TRINITY_DN10645_c0_g1	UNIPROTKB|A7SK73	48.5	1.7e-12	5507318	v1g245816	GO:0005744	mitochondrial inner membrane presequence translocase complex	cellular_component	6
TRINITY_DN10645_c0_g1	UNIPROTKB|A7SK73	48.5	1.7e-12	5507318	v1g245816	GO:0030150	protein import into mitochondrial matrix	biological_process	12
TRINITY_DN10645_c0_g1	UNIPROTKB|A7SK73	48.5	1.7e-12	5507318	v1g245816	GO:0032981	mitochondrial respiratory chain complex I assembly	biological_process	9
TRINITY_DN10645_c0_g1	UNIPROTKB|A7SK73	48.5	1.7e-12	5507318	v1g245816	GO:0033617	mitochondrial respiratory chain complex IV assembly	biological_process	10
TRINITY_DN10646_c0_g1	ZFIN|ZDB-GENE-040426-1672	51.6	2.7e-29	393687	ndufa13	GO:0016020	membrane	cellular_component	3
TRINITY_DN10646_c0_g1	ZFIN|ZDB-GENE-040426-1672	51.6	2.7e-29	393687	ndufa13	GO:0016021	integral component of membrane	cellular_component	5
TRINITY_DN10656_c0_g1	DICTYBASE|DDB_G0288299	70	2.7e-116	8626557	pdx1	GO:0003674	molecular_function	molecular_function	2
TRINITY_DN10656_c0_g1	DICTYBASE|DDB_G0288299	70	2.7e-116	8626557	pdx1	GO:0003824	catalytic activity	molecular_function	3
TRINITY_DN10656_c0_g1	DICTYBASE|DDB_G0288299	70	2.7e-116	8626557	pdx1	GO:0004359	glutaminase activity	molecular_function	7
TRINITY_DN10656_c0_g1	DICTYBASE|DDB_G0288299	70	2.7e-116	8626557	pdx1	GO:0005615	extracellular space	cellular_component	4
TRINITY_DN10656_c0_g1	DICTYBASE|DDB_G0288299	70	2.7e-116	8626557	pdx1	GO:0006520	cellular amino acid metabolic process	biological_process	8
TRINITY_DN10656_c0_g1	DICTYBASE|DDB_G0288299	70	2.7e-116	8626557	pdx1	GO:0008152	metabolic process	biological_process	3
TRINITY_DN10656_c0_g1	DICTYBASE|DDB_G0288299	70	2.7e-116	8626557	pdx1	GO:0008614	pyridoxine metabolic process	biological_process	6
TRINITY_DN10656_c0_g1	DICTYBASE|DDB_G0288299	70	2.7e-116	8626557	pdx1	GO:0008615	pyridoxine biosynthetic process	biological_process	7
TRINITY_DN10656_c0_g1	DICTYBASE|DDB_G0288299	70	2.7e-116	8626557	pdx1	GO:0016829	lyase activity	molecular_function	4
TRINITY_DN10656_c0_g1	DICTYBASE|DDB_G0288299	70	2.7e-116	8626557	pdx1	GO:0016843	amine-lyase activity	molecular_function	6
TRINITY_DN10656_c0_g1	DICTYBASE|DDB_G0288299	70	2.7e-116	8626557	pdx1	GO:0036381	pyridoxal 5'-phosphate synthase (glutamine hydrolysing) activity	molecular_function	7
TRINITY_DN10656_c0_g1	DICTYBASE|DDB_G0288299	70	2.7e-116	8626557	pdx1	GO:0042819	vitamin B6 biosynthetic process	biological_process	8
TRINITY_DN10656_c0_g1	DICTYBASE|DDB_G0288299	70	2.7e-116	8626557	pdx1	GO:0042823	pyridoxal phosphate biosynthetic process	biological_process	8
TRINITY_DN10656_c0_g1	DICTYBASE|DDB_G0288299	70	2.7e-116	8626557	pdx1	GO:0045335	phagocytic vesicle	cellular_component	8
TRINITY_DN10657_c0_g1	UNIPROTKB|F1P3R9	69.1	4.2e-35	396235	ETS1	GO:0000981	RNA polymerase II transcription factor activity, sequence-specific DNA binding	molecular_function	5
TRINITY_DN10657_c0_g1	UNIPROTKB|F1P3R9	69.1	4.2e-35	396235	ETS1	GO:0005634	nucleus	cellular_component	6
TRINITY_DN10657_c0_g1	UNIPROTKB|F1P3R9	69.1	4.2e-35	396235	ETS1	GO:0005654	nucleoplasm	cellular_component	6
TRINITY_DN10657_c0_g1	UNIPROTKB|F1P3R9	69.1	4.2e-35	396235	ETS1	GO:0005667	transcription factor complex	cellular_component	4
TRINITY_DN10657_c0_g1	UNIPROTKB|F1P3R9	69.1	4.2e-35	396235	ETS1	GO:0006357	regulation of transcription by RNA polymerase II	biological_process	9
TRINITY_DN10657_c0_g1	UNIPROTKB|F1P3R9	69.1	4.2e-35	396235	ETS1	GO:0006366	transcription by RNA polymerase II	biological_process	9
TRINITY_DN10657_c0_g1	UNIPROTKB|F1P3R9	69.1	4.2e-35	396235	ETS1	GO:0010595	positive regulation of endothelial cell migration	biological_process	10
TRINITY_DN10657_c0_g1	UNIPROTKB|F1P3R9	69.1	4.2e-35	396235	ETS1	GO:0030154	cell differentiation	biological_process	5
TRINITY_DN10657_c0_g1	UNIPROTKB|F1P3R9	69.1	4.2e-35	396235	ETS1	GO:0030578	PML body organization	biological_process	8
TRINITY_DN10657_c0_g1	UNIPROTKB|F1P3R9	69.1	4.2e-35	396235	ETS1	GO:0042802	identical protein binding	molecular_function	5
TRINITY_DN10657_c0_g1	UNIPROTKB|F1P3R9	69.1	4.2e-35	396235	ETS1	GO:0042981	regulation of apoptotic process	biological_process	8
TRINITY_DN10657_c0_g1	UNIPROTKB|F1P3R9	69.1	4.2e-35	396235	ETS1	GO:0043565	sequence-specific DNA binding	molecular_function	7
TRINITY_DN10657_c0_g1	UNIPROTKB|F1P3R9	69.1	4.2e-35	396235	ETS1	GO:0045648	positive regulation of erythrocyte differentiation	biological_process	9
TRINITY_DN10657_c0_g1	UNIPROTKB|F1P3R9	69.1	4.2e-35	396235	ETS1	GO:0045765	regulation of angiogenesis	biological_process	7
TRINITY_DN10657_c0_g1	UNIPROTKB|F1P3R9	69.1	4.2e-35	396235	ETS1	GO:0045786	negative regulation of cell cycle	biological_process	7
TRINITY_DN10657_c0_g1	UNIPROTKB|F1P3R9	69.1	4.2e-35	396235	ETS1	GO:0045944	positive regulation of transcription by RNA polymerase II	biological_process	10
TRINITY_DN10657_c0_g1	UNIPROTKB|F1P3R9	69.1	4.2e-35	396235	ETS1	GO:0046677	response to antibiotic	biological_process	5
TRINITY_DN10657_c0_g1	UNIPROTKB|F1P3R9	69.1	4.2e-35	396235	ETS1	GO:0048870	cell motility	biological_process	5
TRINITY_DN10657_c0_g1	UNIPROTKB|F1P3R9	69.1	4.2e-35	396235	ETS1	GO:0050728	negative regulation of inflammatory response	biological_process	9
TRINITY_DN10658_c0_g1	UNIPROTKB|F6UD20	66.4	6.7e-92	-	rpl7a	GO:0000470	maturation of LSU-rRNA	biological_process	12
TRINITY_DN10658_c0_g1	UNIPROTKB|F6UD20	66.4	6.7e-92	-	rpl7a	GO:0003723	RNA binding	molecular_function	6
TRINITY_DN10658_c0_g1	UNIPROTKB|F6UD20	66.4	6.7e-92	-	rpl7a	GO:0006412	translation	biological_process	8
TRINITY_DN10658_c0_g1	UNIPROTKB|F6UD20	66.4	6.7e-92	-	rpl7a	GO:0022625	cytosolic large ribosomal subunit	cellular_component	8
TRINITY_DN10661_c0_g2	MGI|MGI:1914491	58.8	2.8e-53	67241	Smc6	GO:0000166	nucleotide binding	molecular_function	5
TRINITY_DN10661_c0_g2	MGI|MGI:1914491	58.8	2.8e-53	67241	Smc6	GO:0000722	telomere maintenance via recombination	biological_process	9
TRINITY_DN10661_c0_g2	MGI|MGI:1914491	58.8	2.8e-53	67241	Smc6	GO:0000724	double-strand break repair via homologous recombination	biological_process	10
TRINITY_DN10661_c0_g2	MGI|MGI:1914491	58.8	2.8e-53	67241	Smc6	GO:0000781	chromosome, telomeric region	cellular_component	7
TRINITY_DN10661_c0_g2	MGI|MGI:1914491	58.8	2.8e-53	67241	Smc6	GO:0000803	sex chromosome	cellular_component	7
TRINITY_DN10661_c0_g2	MGI|MGI:1914491	58.8	2.8e-53	67241	Smc6	GO:0005524	ATP binding	molecular_function	5
TRINITY_DN10661_c0_g2	MGI|MGI:1914491	58.8	2.8e-53	67241	Smc6	GO:0005622	intracellular	cellular_component	4
TRINITY_DN10661_c0_g2	MGI|MGI:1914491	58.8	2.8e-53	67241	Smc6	GO:0005634	nucleus	cellular_component	6
TRINITY_DN10661_c0_g2	MGI|MGI:1914491	58.8	2.8e-53	67241	Smc6	GO:0005654	nucleoplasm	cellular_component	6
TRINITY_DN10661_c0_g2	MGI|MGI:1914491	58.8	2.8e-53	67241	Smc6	GO:0005694	chromosome	cellular_component	6
TRINITY_DN10661_c0_g2	MGI|MGI:1914491	58.8	2.8e-53	67241	Smc6	GO:0006281	DNA repair	biological_process	8
TRINITY_DN10661_c0_g2	MGI|MGI:1914491	58.8	2.8e-53	67241	Smc6	GO:0006310	DNA recombination	biological_process	8
TRINITY_DN10661_c0_g2	MGI|MGI:1914491	58.8	2.8e-53	67241	Smc6	GO:0006974	cellular response to DNA damage stimulus	biological_process	6
TRINITY_DN10661_c0_g2	MGI|MGI:1914491	58.8	2.8e-53	67241	Smc6	GO:0016605	PML body	cellular_component	8
TRINITY_DN10661_c0_g2	MGI|MGI:1914491	58.8	2.8e-53	67241	Smc6	GO:0030915	Smc5-Smc6 complex	cellular_component	6
TRINITY_DN10661_c0_g2	MGI|MGI:1914491	58.8	2.8e-53	67241	Smc6	GO:0031625	ubiquitin protein ligase binding	molecular_function	7
TRINITY_DN10661_c0_g2	MGI|MGI:1914491	58.8	2.8e-53	67241	Smc6	GO:0035061	interchromatin granule	cellular_component	8
TRINITY_DN10661_c0_g2	MGI|MGI:1914491	58.8	2.8e-53	67241	Smc6	GO:0035861	site of double-strand break	cellular_component	7
TRINITY_DN10661_c0_g2	MGI|MGI:1914491	58.8	2.8e-53	67241	Smc6	GO:0051984	positive regulation of chromosome segregation	biological_process	7
TRINITY_DN10661_c0_g2	MGI|MGI:1914491	58.8	2.8e-53	67241	Smc6	GO:0090398	cellular senescence	biological_process	6
TRINITY_DN10669_c0_g1	UNIPROTKB|P32138	34.6	1.3e-97	948376	yihQ	GO:0061720	6-sulfoquinovose(1-) catabolic process to glycerone phosphate and 3-sulfolactaldehyde	biological_process	6
TRINITY_DN10669_c0_g1	UNIPROTKB|P32138	34.6	1.3e-97	948376	yihQ	GO:1990929	sulfoquinovosidase activity	molecular_function	6
TRINITY_DN1066_c0_g1	MGI|MGI:98370	58.9	2.3e-27	20681	Sox8	GO:0000979	RNA polymerase II core promoter sequence-specific DNA binding	molecular_function	10
TRINITY_DN1066_c0_g1	MGI|MGI:98370	58.9	2.3e-27	20681	Sox8	GO:0000981	RNA polymerase II transcription factor activity, sequence-specific DNA binding	molecular_function	5
TRINITY_DN1066_c0_g1	MGI|MGI:98370	58.9	2.3e-27	20681	Sox8	GO:0001649	osteoblast differentiation	biological_process	6
TRINITY_DN1066_c0_g1	MGI|MGI:98370	58.9	2.3e-27	20681	Sox8	GO:0001701	in utero embryonic development	biological_process	8
TRINITY_DN1066_c0_g1	MGI|MGI:98370	58.9	2.3e-27	20681	Sox8	GO:0001755	neural crest cell migration	biological_process	8
TRINITY_DN1066_c0_g1	MGI|MGI:98370	58.9	2.3e-27	20681	Sox8	GO:0003677	DNA binding	molecular_function	6
TRINITY_DN1066_c0_g1	MGI|MGI:98370	58.9	2.3e-27	20681	Sox8	GO:0003700	DNA binding transcription factor activity	molecular_function	4
TRINITY_DN1066_c0_g1	MGI|MGI:98370	58.9	2.3e-27	20681	Sox8	GO:0005515	protein binding	molecular_function	4
TRINITY_DN1066_c0_g1	MGI|MGI:98370	58.9	2.3e-27	20681	Sox8	GO:0005634	nucleus	cellular_component	6
TRINITY_DN1066_c0_g1	MGI|MGI:98370	58.9	2.3e-27	20681	Sox8	GO:0005737	cytoplasm	cellular_component	5
TRINITY_DN1066_c0_g1	MGI|MGI:98370	58.9	2.3e-27	20681	Sox8	GO:0006351	transcription, DNA-templated	biological_process	8
TRINITY_DN1066_c0_g1	MGI|MGI:98370	58.9	2.3e-27	20681	Sox8	GO:0006355	regulation of transcription, DNA-templated	biological_process	8
TRINITY_DN1066_c0_g1	MGI|MGI:98370	58.9	2.3e-27	20681	Sox8	GO:0007165	signal transduction	biological_process	4
TRINITY_DN1066_c0_g1	MGI|MGI:98370	58.9	2.3e-27	20681	Sox8	GO:0007283	spermatogenesis	biological_process	7
TRINITY_DN1066_c0_g1	MGI|MGI:98370	58.9	2.3e-27	20681	Sox8	GO:0007422	peripheral nervous system development	biological_process	6
TRINITY_DN1066_c0_g1	MGI|MGI:98370	58.9	2.3e-27	20681	Sox8	GO:0008134	transcription factor binding	molecular_function	5
TRINITY_DN1066_c0_g1	MGI|MGI:98370	58.9	2.3e-27	20681	Sox8	GO:0008584	male gonad development	biological_process	7
TRINITY_DN1066_c0_g1	MGI|MGI:98370	58.9	2.3e-27	20681	Sox8	GO:0010628	positive regulation of gene expression	biological_process	8
TRINITY_DN1066_c0_g1	MGI|MGI:98370	58.9	2.3e-27	20681	Sox8	GO:0010817	regulation of hormone levels	biological_process	5
TRINITY_DN1066_c0_g1	MGI|MGI:98370	58.9	2.3e-27	20681	Sox8	GO:0014015	positive regulation of gliogenesis	biological_process	10
TRINITY_DN1066_c0_g1	MGI|MGI:98370	58.9	2.3e-27	20681	Sox8	GO:0033690	positive regulation of osteoblast proliferation	biological_process	8
TRINITY_DN1066_c0_g1	MGI|MGI:98370	58.9	2.3e-27	20681	Sox8	GO:0035914	skeletal muscle cell differentiation	biological_process	6
TRINITY_DN1066_c0_g1	MGI|MGI:98370	58.9	2.3e-27	20681	Sox8	GO:0043066	negative regulation of apoptotic process	biological_process	9
TRINITY_DN1066_c0_g1	MGI|MGI:98370	58.9	2.3e-27	20681	Sox8	GO:0043565	sequence-specific DNA binding	molecular_function	7
TRINITY_DN1066_c0_g1	MGI|MGI:98370	58.9	2.3e-27	20681	Sox8	GO:0044798	nuclear transcription factor complex	cellular_component	5
TRINITY_DN1066_c0_g1	MGI|MGI:98370	58.9	2.3e-27	20681	Sox8	GO:0045165	cell fate commitment	biological_process	5
TRINITY_DN1066_c0_g1	MGI|MGI:98370	58.9	2.3e-27	20681	Sox8	GO:0045444	fat cell differentiation	biological_process	6
TRINITY_DN1066_c0_g1	MGI|MGI:98370	58.9	2.3e-27	20681	Sox8	GO:0045662	negative regulation of myoblast differentiation	biological_process	8
TRINITY_DN1066_c0_g1	MGI|MGI:98370	58.9	2.3e-27	20681	Sox8	GO:0045892	negative regulation of transcription, DNA-templated	biological_process	9
TRINITY_DN1066_c0_g1	MGI|MGI:98370	58.9	2.3e-27	20681	Sox8	GO:0045893	positive regulation of transcription, DNA-templated	biological_process	9
TRINITY_DN1066_c0_g1	MGI|MGI:98370	58.9	2.3e-27	20681	Sox8	GO:0045944	positive regulation of transcription by RNA polymerase II	biological_process	10
TRINITY_DN1066_c0_g1	MGI|MGI:98370	58.9	2.3e-27	20681	Sox8	GO:0046533	negative regulation of photoreceptor cell differentiation	biological_process	11
TRINITY_DN1066_c0_g1	MGI|MGI:98370	58.9	2.3e-27	20681	Sox8	GO:0046982	protein heterodimerization activity	molecular_function	6
TRINITY_DN1066_c0_g1	MGI|MGI:98370	58.9	2.3e-27	20681	Sox8	GO:0048469	cell maturation	biological_process	5
TRINITY_DN1066_c0_g1	MGI|MGI:98370	58.9	2.3e-27	20681	Sox8	GO:0048484	enteric nervous system development	biological_process	6
TRINITY_DN1066_c0_g1	MGI|MGI:98370	58.9	2.3e-27	20681	Sox8	GO:0048709	oligodendrocyte differentiation	biological_process	7
TRINITY_DN1066_c0_g1	MGI|MGI:98370	58.9	2.3e-27	20681	Sox8	GO:0060009	Sertoli cell development	biological_process	7
TRINITY_DN1066_c0_g1	MGI|MGI:98370	58.9	2.3e-27	20681	Sox8	GO:0060018	astrocyte fate commitment	biological_process	7
TRINITY_DN1066_c0_g1	MGI|MGI:98370	58.9	2.3e-27	20681	Sox8	GO:0060041	retina development in camera-type eye	biological_process	5
TRINITY_DN1066_c0_g1	MGI|MGI:98370	58.9	2.3e-27	20681	Sox8	GO:0060221	retinal rod cell differentiation	biological_process	10
TRINITY_DN1066_c0_g1	MGI|MGI:98370	58.9	2.3e-27	20681	Sox8	GO:0060612	adipose tissue development	biological_process	7
TRINITY_DN1066_c0_g1	MGI|MGI:98370	58.9	2.3e-27	20681	Sox8	GO:0061138	morphogenesis of a branching epithelium	biological_process	6
TRINITY_DN1066_c0_g1	MGI|MGI:98370	58.9	2.3e-27	20681	Sox8	GO:0072034	renal vesicle induction	biological_process	5
TRINITY_DN1066_c0_g1	MGI|MGI:98370	58.9	2.3e-27	20681	Sox8	GO:0072197	ureter morphogenesis	biological_process	6
TRINITY_DN1066_c0_g1	MGI|MGI:98370	58.9	2.3e-27	20681	Sox8	GO:0072289	metanephric nephron tubule formation	biological_process	9
TRINITY_DN1066_c0_g1	MGI|MGI:98370	58.9	2.3e-27	20681	Sox8	GO:0090184	positive regulation of kidney development	biological_process	7
TRINITY_DN1066_c0_g1	MGI|MGI:98370	58.9	2.3e-27	20681	Sox8	GO:0090190	positive regulation of branching involved in ureteric bud morphogenesis	biological_process	10
TRINITY_DN10671_c0_g1	TAIR|locus:2150625	100	3.4e-37	831690	MLS	GO:0004474	malate synthase activity	molecular_function	7
TRINITY_DN10671_c0_g1	TAIR|locus:2150625	100	3.4e-37	831690	MLS	GO:0005634	nucleus	cellular_component	6
TRINITY_DN10671_c0_g1	TAIR|locus:2150625	100	3.4e-37	831690	MLS	GO:0005737	cytoplasm	cellular_component	5
TRINITY_DN10671_c0_g1	TAIR|locus:2150625	100	3.4e-37	831690	MLS	GO:0006097	glyoxylate cycle	biological_process	7
TRINITY_DN10671_c0_g1	TAIR|locus:2150625	100	3.4e-37	831690	MLS	GO:0006099	tricarboxylic acid cycle	biological_process	5
TRINITY_DN10671_c0_g1	TAIR|locus:2150625	100	3.4e-37	831690	MLS	GO:0009514	glyoxysome	cellular_component	8
TRINITY_DN10671_c0_g2	UNIPROTKB|I1MUM7	92.3	1.3e-83	732628	GLYMA_17G128000	GO:0004474	malate synthase activity	molecular_function	7
TRINITY_DN10671_c0_g2	UNIPROTKB|I1MUM7	92.3	1.3e-83	732628	GLYMA_17G128000	GO:0005737	cytoplasm	cellular_component	5
TRINITY_DN10671_c0_g2	UNIPROTKB|I1MUM7	92.3	1.3e-83	732628	GLYMA_17G128000	GO:0006097	glyoxylate cycle	biological_process	7
TRINITY_DN10672_c0_g1	ZFIN|ZDB-GENE-071005-2	57.7	7.6e-16	100145909	srsf3b	GO:0003676	nucleic acid binding	molecular_function	5
TRINITY_DN10672_c0_g1	ZFIN|ZDB-GENE-071005-2	57.7	7.6e-16	100145909	srsf3b	GO:0003723	RNA binding	molecular_function	6
TRINITY_DN10674_c0_g1	UNIPROTKB|C0KIF4	61.8	2.3e-158	576055	Sp-Vasa	GO:0004004	ATP-dependent RNA helicase activity	molecular_function	11
TRINITY_DN10674_c0_g1	UNIPROTKB|C0KIF4	61.8	2.3e-158	576055	Sp-Vasa	GO:0010501	RNA secondary structure unwinding	biological_process	9
TRINITY_DN10674_c0_g1	UNIPROTKB|C0KIF4	61.8	2.3e-158	576055	Sp-Vasa	GO:0043186	P granule	cellular_component	8
TRINITY_DN10674_c0_g1	UNIPROTKB|C0KIF4	61.8	2.3e-158	576055	Sp-Vasa	GO:0048471	perinuclear region of cytoplasm	cellular_component	6
TRINITY_DN10697_c0_g2	TAIR|locus:2044851	84.6	4.9e-23	818226	LOS2	GO:0000015	phosphopyruvate hydratase complex	cellular_component	7
TRINITY_DN10697_c0_g2	TAIR|locus:2044851	84.6	4.9e-23	818226	LOS2	GO:0000287	magnesium ion binding	molecular_function	7
TRINITY_DN10697_c0_g2	TAIR|locus:2044851	84.6	4.9e-23	818226	LOS2	GO:0003677	DNA binding	molecular_function	6
TRINITY_DN10697_c0_g2	TAIR|locus:2044851	84.6	4.9e-23	818226	LOS2	GO:0004634	phosphopyruvate hydratase activity	molecular_function	7
TRINITY_DN10697_c0_g2	TAIR|locus:2044851	84.6	4.9e-23	818226	LOS2	GO:0005507	copper ion binding	molecular_function	8
TRINITY_DN10697_c0_g2	TAIR|locus:2044851	84.6	4.9e-23	818226	LOS2	GO:0005634	nucleus	cellular_component	6
TRINITY_DN10697_c0_g2	TAIR|locus:2044851	84.6	4.9e-23	818226	LOS2	GO:0005737	cytoplasm	cellular_component	5
TRINITY_DN10697_c0_g2	TAIR|locus:2044851	84.6	4.9e-23	818226	LOS2	GO:0005739	mitochondrion	cellular_component	6
TRINITY_DN10697_c0_g2	TAIR|locus:2044851	84.6	4.9e-23	818226	LOS2	GO:0005740	mitochondrial envelope	cellular_component	6
TRINITY_DN10697_c0_g2	TAIR|locus:2044851	84.6	4.9e-23	818226	LOS2	GO:0005741	mitochondrial outer membrane	cellular_component	6
TRINITY_DN10697_c0_g2	TAIR|locus:2044851	84.6	4.9e-23	818226	LOS2	GO:0005829	cytosol	cellular_component	6
TRINITY_DN10697_c0_g2	TAIR|locus:2044851	84.6	4.9e-23	818226	LOS2	GO:0005886	plasma membrane	cellular_component	4
TRINITY_DN10697_c0_g2	TAIR|locus:2044851	84.6	4.9e-23	818226	LOS2	GO:0006096	glycolytic process	biological_process	10
TRINITY_DN10697_c0_g2	TAIR|locus:2044851	84.6	4.9e-23	818226	LOS2	GO:0006351	transcription, DNA-templated	biological_process	8
TRINITY_DN10697_c0_g2	TAIR|locus:2044851	84.6	4.9e-23	818226	LOS2	GO:0006355	regulation of transcription, DNA-templated	biological_process	8
TRINITY_DN10697_c0_g2	TAIR|locus:2044851	84.6	4.9e-23	818226	LOS2	GO:0009409	response to cold	biological_process	5
TRINITY_DN10697_c0_g2	TAIR|locus:2044851	84.6	4.9e-23	818226	LOS2	GO:0009416	response to light stimulus	biological_process	6
TRINITY_DN10697_c0_g2	TAIR|locus:2044851	84.6	4.9e-23	818226	LOS2	GO:0009506	plasmodesma	cellular_component	5
TRINITY_DN10697_c0_g2	TAIR|locus:2044851	84.6	4.9e-23	818226	LOS2	GO:0009507	chloroplast	cellular_component	7
TRINITY_DN10697_c0_g2	TAIR|locus:2044851	84.6	4.9e-23	818226	LOS2	GO:0009651	response to salt stress	biological_process	6
TRINITY_DN10697_c0_g2	TAIR|locus:2044851	84.6	4.9e-23	818226	LOS2	GO:0009737	response to abscisic acid	biological_process	6
TRINITY_DN10697_c0_g2	TAIR|locus:2044851	84.6	4.9e-23	818226	LOS2	GO:0016020	membrane	cellular_component	3
TRINITY_DN10697_c0_g2	TAIR|locus:2044851	84.6	4.9e-23	818226	LOS2	GO:0046686	response to cadmium ion	biological_process	7
TRINITY_DN10697_c0_g2	TAIR|locus:2044851	84.6	4.9e-23	818226	LOS2	GO:0048046	apoplast	cellular_component	4
TRINITY_DN10711_c0_g1	TAIR|locus:2181833	96.9	1.5e-31	831020	HSC70-1	GO:0002020	protease binding	molecular_function	6
TRINITY_DN10711_c0_g1	TAIR|locus:2181833	96.9	1.5e-31	831020	HSC70-1	GO:0005515	protein binding	molecular_function	4
TRINITY_DN10711_c0_g1	TAIR|locus:2181833	96.9	1.5e-31	831020	HSC70-1	GO:0005524	ATP binding	molecular_function	5
TRINITY_DN10711_c0_g1	TAIR|locus:2181833	96.9	1.5e-31	831020	HSC70-1	GO:0005618	cell wall	cellular_component	5
TRINITY_DN10711_c0_g1	TAIR|locus:2181833	96.9	1.5e-31	831020	HSC70-1	GO:0005634	nucleus	cellular_component	6
TRINITY_DN10711_c0_g1	TAIR|locus:2181833	96.9	1.5e-31	831020	HSC70-1	GO:0005730	nucleolus	cellular_component	6
TRINITY_DN10711_c0_g1	TAIR|locus:2181833	96.9	1.5e-31	831020	HSC70-1	GO:0005737	cytoplasm	cellular_component	5
TRINITY_DN10711_c0_g1	TAIR|locus:2181833	96.9	1.5e-31	831020	HSC70-1	GO:0005774	vacuolar membrane	cellular_component	7
TRINITY_DN10711_c0_g1	TAIR|locus:2181833	96.9	1.5e-31	831020	HSC70-1	GO:0005794	Golgi apparatus	cellular_component	6
TRINITY_DN10711_c0_g1	TAIR|locus:2181833	96.9	1.5e-31	831020	HSC70-1	GO:0005829	cytosol	cellular_component	6
TRINITY_DN10711_c0_g1	TAIR|locus:2181833	96.9	1.5e-31	831020	HSC70-1	GO:0005886	plasma membrane	cellular_component	4
TRINITY_DN10711_c0_g1	TAIR|locus:2181833	96.9	1.5e-31	831020	HSC70-1	GO:0006351	transcription, DNA-templated	biological_process	8
TRINITY_DN10711_c0_g1	TAIR|locus:2181833	96.9	1.5e-31	831020	HSC70-1	GO:0006355	regulation of transcription, DNA-templated	biological_process	8
TRINITY_DN10711_c0_g1	TAIR|locus:2181833	96.9	1.5e-31	831020	HSC70-1	GO:0006457	protein folding	biological_process	4
TRINITY_DN10711_c0_g1	TAIR|locus:2181833	96.9	1.5e-31	831020	HSC70-1	GO:0009408	response to heat	biological_process	5
TRINITY_DN10711_c0_g1	TAIR|locus:2181833	96.9	1.5e-31	831020	HSC70-1	GO:0009409	response to cold	biological_process	5
TRINITY_DN10711_c0_g1	TAIR|locus:2181833	96.9	1.5e-31	831020	HSC70-1	GO:0009506	plasmodesma	cellular_component	5
TRINITY_DN10711_c0_g1	TAIR|locus:2181833	96.9	1.5e-31	831020	HSC70-1	GO:0009507	chloroplast	cellular_component	7
TRINITY_DN10711_c0_g1	TAIR|locus:2181833	96.9	1.5e-31	831020	HSC70-1	GO:0009615	response to virus	biological_process	7
TRINITY_DN10711_c0_g1	TAIR|locus:2181833	96.9	1.5e-31	831020	HSC70-1	GO:0010187	negative regulation of seed germination	biological_process	10
TRINITY_DN10711_c0_g1	TAIR|locus:2181833	96.9	1.5e-31	831020	HSC70-1	GO:0016020	membrane	cellular_component	3
TRINITY_DN10711_c0_g1	TAIR|locus:2181833	96.9	1.5e-31	831020	HSC70-1	GO:0022626	cytosolic ribosome	cellular_component	7
TRINITY_DN10711_c0_g1	TAIR|locus:2181833	96.9	1.5e-31	831020	HSC70-1	GO:0031072	heat shock protein binding	molecular_function	5
TRINITY_DN10711_c0_g1	TAIR|locus:2181833	96.9	1.5e-31	831020	HSC70-1	GO:0042742	defense response to bacterium	biological_process	8
TRINITY_DN10711_c0_g1	TAIR|locus:2181833	96.9	1.5e-31	831020	HSC70-1	GO:0046686	response to cadmium ion	biological_process	7
TRINITY_DN10711_c0_g1	TAIR|locus:2181833	96.9	1.5e-31	831020	HSC70-1	GO:0048046	apoplast	cellular_component	4
TRINITY_DN10711_c0_g1	TAIR|locus:2181833	96.9	1.5e-31	831020	HSC70-1	GO:0050832	defense response to fungus	biological_process	8
TRINITY_DN10711_c0_g1	TAIR|locus:2181833	96.9	1.5e-31	831020	HSC70-1	GO:0090332	stomatal closure	biological_process	5
TRINITY_DN10711_c0_g1	TAIR|locus:2181833	96.9	1.5e-31	831020	HSC70-1	GO:0098542	defense response to other organism	biological_process	6
TRINITY_DN10711_c0_g3	TAIR|locus:2101222	95.5	1.8e-29	820438	HSP70	GO:0005524	ATP binding	molecular_function	5
TRINITY_DN10711_c0_g3	TAIR|locus:2101222	95.5	1.8e-29	820438	HSP70	GO:0005618	cell wall	cellular_component	5
TRINITY_DN10711_c0_g3	TAIR|locus:2101222	95.5	1.8e-29	820438	HSP70	GO:0005634	nucleus	cellular_component	6
TRINITY_DN10711_c0_g3	TAIR|locus:2101222	95.5	1.8e-29	820438	HSP70	GO:0005739	mitochondrion	cellular_component	6
TRINITY_DN10711_c0_g3	TAIR|locus:2101222	95.5	1.8e-29	820438	HSP70	GO:0005774	vacuolar membrane	cellular_component	7
TRINITY_DN10711_c0_g3	TAIR|locus:2101222	95.5	1.8e-29	820438	HSP70	GO:0005794	Golgi apparatus	cellular_component	6
TRINITY_DN10711_c0_g3	TAIR|locus:2101222	95.5	1.8e-29	820438	HSP70	GO:0005829	cytosol	cellular_component	6
TRINITY_DN10711_c0_g3	TAIR|locus:2101222	95.5	1.8e-29	820438	HSP70	GO:0005886	plasma membrane	cellular_component	4
TRINITY_DN10711_c0_g3	TAIR|locus:2101222	95.5	1.8e-29	820438	HSP70	GO:0006351	transcription, DNA-templated	biological_process	8
TRINITY_DN10711_c0_g3	TAIR|locus:2101222	95.5	1.8e-29	820438	HSP70	GO:0006355	regulation of transcription, DNA-templated	biological_process	8
TRINITY_DN10711_c0_g3	TAIR|locus:2101222	95.5	1.8e-29	820438	HSP70	GO:0006457	protein folding	biological_process	4
TRINITY_DN10711_c0_g3	TAIR|locus:2101222	95.5	1.8e-29	820438	HSP70	GO:0006986	response to unfolded protein	biological_process	6
TRINITY_DN10711_c0_g3	TAIR|locus:2101222	95.5	1.8e-29	820438	HSP70	GO:0009266	response to temperature stimulus	biological_process	5
TRINITY_DN10711_c0_g3	TAIR|locus:2101222	95.5	1.8e-29	820438	HSP70	GO:0009408	response to heat	biological_process	5
TRINITY_DN10711_c0_g3	TAIR|locus:2101222	95.5	1.8e-29	820438	HSP70	GO:0009615	response to virus	biological_process	7
TRINITY_DN10711_c0_g3	TAIR|locus:2101222	95.5	1.8e-29	820438	HSP70	GO:0009617	response to bacterium	biological_process	7
TRINITY_DN10711_c0_g3	TAIR|locus:2101222	95.5	1.8e-29	820438	HSP70	GO:0009644	response to high light intensity	biological_process	8
TRINITY_DN10711_c0_g3	TAIR|locus:2101222	95.5	1.8e-29	820438	HSP70	GO:0016567	protein ubiquitination	biological_process	11
TRINITY_DN10711_c0_g3	TAIR|locus:2101222	95.5	1.8e-29	820438	HSP70	GO:0031625	ubiquitin protein ligase binding	molecular_function	7
TRINITY_DN10711_c0_g3	TAIR|locus:2101222	95.5	1.8e-29	820438	HSP70	GO:0042026	protein refolding	biological_process	5
TRINITY_DN10711_c0_g3	TAIR|locus:2101222	95.5	1.8e-29	820438	HSP70	GO:0042542	response to hydrogen peroxide	biological_process	7
TRINITY_DN10711_c0_g3	TAIR|locus:2101222	95.5	1.8e-29	820438	HSP70	GO:0044183	protein binding involved in protein folding	molecular_function	3
TRINITY_DN10711_c0_g3	TAIR|locus:2101222	95.5	1.8e-29	820438	HSP70	GO:0046686	response to cadmium ion	biological_process	7
TRINITY_DN10711_c0_g3	TAIR|locus:2101222	95.5	1.8e-29	820438	HSP70	GO:0048046	apoplast	cellular_component	4
TRINITY_DN10718_c0_g1	ZFIN|ZDB-GENE-040426-694	70.9	1.2e-185	-	crnkl1	GO:0000245	spliceosomal complex assembly	biological_process	9
TRINITY_DN10718_c0_g1	ZFIN|ZDB-GENE-040426-694	70.9	1.2e-185	-	crnkl1	GO:0000974	Prp19 complex	cellular_component	4
TRINITY_DN10718_c0_g1	ZFIN|ZDB-GENE-040426-694	70.9	1.2e-185	-	crnkl1	GO:0006396	RNA processing	biological_process	9
TRINITY_DN10718_c0_g1	ZFIN|ZDB-GENE-040426-694	70.9	1.2e-185	-	crnkl1	GO:0071010	prespliceosome	cellular_component	7
TRINITY_DN10718_c0_g1	ZFIN|ZDB-GENE-040426-694	70.9	1.2e-185	-	crnkl1	GO:0071011	precatalytic spliceosome	cellular_component	7
TRINITY_DN10718_c0_g1	ZFIN|ZDB-GENE-040426-694	70.9	1.2e-185	-	crnkl1	GO:0071012	catalytic step 1 spliceosome	cellular_component	7
TRINITY_DN10718_c0_g1	ZFIN|ZDB-GENE-040426-694	70.9	1.2e-185	-	crnkl1	GO:0071013	catalytic step 2 spliceosome	cellular_component	7
TRINITY_DN10718_c0_g1	ZFIN|ZDB-GENE-040426-694	70.9	1.2e-185	-	crnkl1	GO:0071014	post-mRNA release spliceosomal complex	cellular_component	7
TRINITY_DN10724_c0_g2	ZFIN|ZDB-GENE-040426-1139	61.8	2.2e-78	394006	stoml2	GO:0003674	molecular_function	molecular_function	2
TRINITY_DN10724_c0_g2	ZFIN|ZDB-GENE-040426-1139	61.8	2.2e-78	394006	stoml2	GO:0016020	membrane	cellular_component	3
TRINITY_DN10726_c0_g1	UNIPROTKB|A7SWR6	70.6	4.1e-105	5502798	v1g237573	GO:0003735	structural constituent of ribosome	molecular_function	4
TRINITY_DN10726_c0_g1	UNIPROTKB|A7SWR6	70.6	4.1e-105	5502798	v1g237573	GO:0006412	translation	biological_process	8
TRINITY_DN10729_c0_g1	CGD|CAL0000174729	27.2	3.6e-14	3640237	C1_01400C_A	GO:0005783	endoplasmic reticulum	cellular_component	6
TRINITY_DN10729_c0_g1	CGD|CAL0000174729	27.2	3.6e-14	3640237	C1_01400C_A	GO:0016020	membrane	cellular_component	3
TRINITY_DN10729_c0_g1	CGD|CAL0000174729	27.2	3.6e-14	3640237	C1_01400C_A	GO:0019722	calcium-mediated signaling	biological_process	7
TRINITY_DN10729_c0_g1	CGD|CAL0000174729	27.2	3.6e-14	3640237	C1_01400C_A	GO:0042392	sphingosine-1-phosphate phosphatase activity	molecular_function	8
TRINITY_DN10734_c0_g1	UNIPROTKB|C6SWY6	60.6	6.3e-45	100305867	GLYMA_09G040600	GO:0004864	protein phosphatase inhibitor activity	molecular_function	7
TRINITY_DN10734_c0_g1	UNIPROTKB|C6SWY6	60.6	6.3e-45	100305867	GLYMA_09G040600	GO:0005634	nucleus	cellular_component	6
TRINITY_DN10734_c0_g1	UNIPROTKB|C6SWY6	60.6	6.3e-45	100305867	GLYMA_09G040600	GO:0005737	cytoplasm	cellular_component	5
TRINITY_DN10734_c0_g1	UNIPROTKB|C6SWY6	60.6	6.3e-45	100305867	GLYMA_09G040600	GO:0009738	abscisic acid-activated signaling pathway	biological_process	6
TRINITY_DN10734_c0_g1	UNIPROTKB|C6SWY6	60.6	6.3e-45	100305867	GLYMA_09G040600	GO:0010427	abscisic acid binding	molecular_function	6
TRINITY_DN10734_c0_g1	UNIPROTKB|C6SWY6	60.6	6.3e-45	100305867	GLYMA_09G040600	GO:0080163	regulation of protein serine/threonine phosphatase activity	biological_process	12
TRINITY_DN1073_c0_g1	UNIPROTKB|F1NMA2	30	3.1e-17	-	SULT1E1	GO:0008210	estrogen metabolic process	biological_process	7
TRINITY_DN1073_c0_g1	UNIPROTKB|F1NMA2	30	3.1e-17	-	SULT1E1	GO:0045600	positive regulation of fat cell differentiation	biological_process	8
TRINITY_DN1073_c0_g1	UNIPROTKB|F1NMA2	30	3.1e-17	-	SULT1E1	GO:0047894	flavonol 3-sulfotransferase activity	molecular_function	7
TRINITY_DN1073_c0_g1	UNIPROTKB|F1NMA2	30	3.1e-17	-	SULT1E1	GO:0050294	steroid sulfotransferase activity	molecular_function	7
TRINITY_DN1073_c0_g1	UNIPROTKB|F1NMA2	30	3.1e-17	-	SULT1E1	GO:0051923	sulfation	biological_process	6
TRINITY_DN10741_c0_g1	MGI|MGI:2142593	55	1.2e-23	102124	Enkd1	GO:0003674	molecular_function	molecular_function	2
TRINITY_DN10741_c0_g1	MGI|MGI:2142593	55	1.2e-23	102124	Enkd1	GO:0005881	cytoplasmic microtubule	cellular_component	8
TRINITY_DN10741_c0_g1	MGI|MGI:2142593	55	1.2e-23	102124	Enkd1	GO:0008150	biological_process	biological_process	2
TRINITY_DN10741_c0_g1	MGI|MGI:2142593	55	1.2e-23	102124	Enkd1	GO:0015630	microtubule cytoskeleton	cellular_component	7
TRINITY_DN10755_c0_g1	UNIPROTKB|Q9NRX6	73	7.7e-24	56900	TMEM167B	GO:0000139	Golgi membrane	cellular_component	7
TRINITY_DN10755_c0_g1	UNIPROTKB|Q9NRX6	73	7.7e-24	56900	TMEM167B	GO:0016021	integral component of membrane	cellular_component	5
TRINITY_DN10759_c0_g2	UNIPROTKB|A7RQH8	96.2	7e-48	5518478	v1g180812	GO:0000790	nuclear chromatin	cellular_component	7
TRINITY_DN10759_c0_g2	UNIPROTKB|A7RQH8	96.2	7e-48	5518478	v1g180812	GO:0003677	DNA binding	molecular_function	6
TRINITY_DN10759_c0_g2	UNIPROTKB|A7RQH8	96.2	7e-48	5518478	v1g180812	GO:0006342	chromatin silencing	biological_process	5
TRINITY_DN10762_c0_g1	UNIPROTKB|Q8N5M1	44.6	4.3e-54	91647	ATPAF2	GO:0005515	protein binding	molecular_function	4
TRINITY_DN10762_c0_g1	UNIPROTKB|Q8N5M1	44.6	4.3e-54	91647	ATPAF2	GO:0005737	cytoplasm	cellular_component	5
TRINITY_DN10762_c0_g1	UNIPROTKB|Q8N5M1	44.6	4.3e-54	91647	ATPAF2	GO:0005739	mitochondrion	cellular_component	6
TRINITY_DN10762_c0_g1	UNIPROTKB|Q8N5M1	44.6	4.3e-54	91647	ATPAF2	GO:0016607	nuclear speck	cellular_component	8
TRINITY_DN10762_c0_g1	UNIPROTKB|Q8N5M1	44.6	4.3e-54	91647	ATPAF2	GO:0043461	proton-transporting ATP synthase complex assembly	biological_process	9
TRINITY_DN10768_c0_g1	UNIPROTKB|B3RJK0	63.8	4.4e-139	6749530	TRIADDRAFT_63207	GO:0003746	translation elongation factor activity	molecular_function	8
TRINITY_DN10768_c0_g1	UNIPROTKB|B3RJK0	63.8	4.4e-139	6749530	TRIADDRAFT_63207	GO:0004364	glutathione transferase activity	molecular_function	6
TRINITY_DN10768_c0_g1	UNIPROTKB|B3RJK0	63.8	4.4e-139	6749530	TRIADDRAFT_63207	GO:0005634	nucleus	cellular_component	6
TRINITY_DN10768_c0_g1	UNIPROTKB|B3RJK0	63.8	4.4e-139	6749530	TRIADDRAFT_63207	GO:0005737	cytoplasm	cellular_component	5
TRINITY_DN10768_c0_g1	UNIPROTKB|B3RJK0	63.8	4.4e-139	6749530	TRIADDRAFT_63207	GO:0006749	glutathione metabolic process	biological_process	8
TRINITY_DN10795_c0_g1	UNIPROTKB|A9URK8	52.5	2.7e-66	5888491	34957	GO:0015629	actin cytoskeleton	cellular_component	7
TRINITY_DN10795_c0_g1	UNIPROTKB|A9URK8	52.5	2.7e-66	5888491	34957	GO:0030036	actin cytoskeleton organization	biological_process	7
TRINITY_DN10795_c0_g1	UNIPROTKB|A9URK8	52.5	2.7e-66	5888491	34957	GO:0051015	actin filament binding	molecular_function	7
TRINITY_DN10804_c0_g1	UNIPROTKB|E2RNV0	48.8	7.6e-135	490529	THOC1	GO:0000445	THO complex part of transcription export complex	cellular_component	5
TRINITY_DN10804_c0_g1	UNIPROTKB|E2RNV0	48.8	7.6e-135	490529	THOC1	GO:0000781	chromosome, telomeric region	cellular_component	7
TRINITY_DN10804_c0_g1	UNIPROTKB|E2RNV0	48.8	7.6e-135	490529	THOC1	GO:0005654	nucleoplasm	cellular_component	6
TRINITY_DN10804_c0_g1	UNIPROTKB|E2RNV0	48.8	7.6e-135	490529	THOC1	GO:0005737	cytoplasm	cellular_component	5
TRINITY_DN10804_c0_g1	UNIPROTKB|E2RNV0	48.8	7.6e-135	490529	THOC1	GO:0006915	apoptotic process	biological_process	6
TRINITY_DN10804_c0_g1	UNIPROTKB|E2RNV0	48.8	7.6e-135	490529	THOC1	GO:0007165	signal transduction	biological_process	4
TRINITY_DN10804_c0_g1	UNIPROTKB|E2RNV0	48.8	7.6e-135	490529	THOC1	GO:0031297	replication fork processing	biological_process	9
TRINITY_DN10804_c0_g1	UNIPROTKB|E2RNV0	48.8	7.6e-135	490529	THOC1	GO:0032786	positive regulation of DNA-templated transcription, elongation	biological_process	10
TRINITY_DN10804_c0_g1	UNIPROTKB|E2RNV0	48.8	7.6e-135	490529	THOC1	GO:0045171	intercellular bridge	cellular_component	4
TRINITY_DN10804_c0_g1	UNIPROTKB|E2RNV0	48.8	7.6e-135	490529	THOC1	GO:0046784	viral mRNA export from host cell nucleus	biological_process	7
TRINITY_DN10804_c0_g1	UNIPROTKB|E2RNV0	48.8	7.6e-135	490529	THOC1	GO:0048297	negative regulation of isotype switching to IgA isotypes	biological_process	11
TRINITY_DN10804_c0_g1	UNIPROTKB|E2RNV0	48.8	7.6e-135	490529	THOC1	GO:2000002	negative regulation of DNA damage checkpoint	biological_process	9
TRINITY_DN10810_c0_g1	ZFIN|ZDB-GENE-040426-2257	49.8	5.2e-74	405820	lactb2	GO:0003723	RNA binding	molecular_function	6
TRINITY_DN10810_c0_g1	ZFIN|ZDB-GENE-040426-2257	49.8	5.2e-74	405820	lactb2	GO:0003727	single-stranded RNA binding	molecular_function	7
TRINITY_DN10810_c0_g1	ZFIN|ZDB-GENE-040426-2257	49.8	5.2e-74	405820	lactb2	GO:0004518	nuclease activity	molecular_function	6
TRINITY_DN10810_c0_g1	ZFIN|ZDB-GENE-040426-2257	49.8	5.2e-74	405820	lactb2	GO:0004519	endonuclease activity	molecular_function	7
TRINITY_DN10810_c0_g1	ZFIN|ZDB-GENE-040426-2257	49.8	5.2e-74	405820	lactb2	GO:0004521	endoribonuclease activity	molecular_function	8
TRINITY_DN10810_c0_g1	ZFIN|ZDB-GENE-040426-2257	49.8	5.2e-74	405820	lactb2	GO:0005739	mitochondrion	cellular_component	6
TRINITY_DN10810_c0_g1	ZFIN|ZDB-GENE-040426-2257	49.8	5.2e-74	405820	lactb2	GO:0005759	mitochondrial matrix	cellular_component	7
TRINITY_DN10810_c0_g1	ZFIN|ZDB-GENE-040426-2257	49.8	5.2e-74	405820	lactb2	GO:0008270	zinc ion binding	molecular_function	8
TRINITY_DN10810_c0_g1	ZFIN|ZDB-GENE-040426-2257	49.8	5.2e-74	405820	lactb2	GO:0016787	hydrolase activity	molecular_function	4
TRINITY_DN10810_c0_g1	ZFIN|ZDB-GENE-040426-2257	49.8	5.2e-74	405820	lactb2	GO:0046872	metal ion binding	molecular_function	6
TRINITY_DN10820_c0_g1	UNIPROTKB|Q96HH6	50.7	2.3e-46	55266	TMEM19	GO:0005515	protein binding	molecular_function	4
TRINITY_DN10820_c0_g1	UNIPROTKB|Q96HH6	50.7	2.3e-46	55266	TMEM19	GO:0016021	integral component of membrane	cellular_component	5
TRINITY_DN10829_c0_g1	UNIPROTKB|Q48BG0	58	8.6e-19	31713785	atpE	GO:0015986	ATP synthesis coupled proton transport	biological_process	13
TRINITY_DN10829_c0_g1	UNIPROTKB|Q48BG0	58	8.6e-19	31713785	atpE	GO:0045264	plasma membrane proton-transporting ATP synthase complex, coupling factor F(o)	cellular_component	7
TRINITY_DN10829_c0_g1	UNIPROTKB|Q48BG0	58	8.6e-19	31713785	atpE	GO:0046933	proton-transporting ATP synthase activity, rotational mechanism	molecular_function	10
TRINITY_DN10830_c0_g2	UNIPROTKB|F1PNA3	44.4	4e-54	607891	MFSD5	GO:0015098	molybdate ion transmembrane transporter activity	molecular_function	8
TRINITY_DN10830_c0_g2	UNIPROTKB|F1PNA3	44.4	4e-54	607891	MFSD5	GO:0015689	molybdate ion transport	biological_process	9
TRINITY_DN10830_c0_g2	UNIPROTKB|F1PNA3	44.4	4e-54	607891	MFSD5	GO:0016021	integral component of membrane	cellular_component	5
TRINITY_DN10833_c0_g1	UNIPROTKB|Q4PM81	83.7	3.3e-43	8037999	IscW_ISCW021239	GO:0022625	cytosolic large ribosomal subunit	cellular_component	8
TRINITY_DN10852_c0_g3	UNIPROTKB|A7S6P8	64.3	3.9e-40	5512288	v1g186353	GO:0000275	mitochondrial proton-transporting ATP synthase complex, catalytic core F(1)	cellular_component	7
TRINITY_DN10852_c0_g3	UNIPROTKB|A7S6P8	64.3	3.9e-40	5512288	v1g186353	GO:0015986	ATP synthesis coupled proton transport	biological_process	13
TRINITY_DN10852_c0_g3	UNIPROTKB|A7S6P8	64.3	3.9e-40	5512288	v1g186353	GO:0046933	proton-transporting ATP synthase activity, rotational mechanism	molecular_function	10
TRINITY_DN10859_c0_g1	MGI|MGI:1919383	52.8	5.4e-13	72133	Trub1	GO:0001522	pseudouridine synthesis	biological_process	10
TRINITY_DN10859_c0_g1	MGI|MGI:1919383	52.8	5.4e-13	72133	Trub1	GO:0003723	RNA binding	molecular_function	6
TRINITY_DN10859_c0_g1	MGI|MGI:1919383	52.8	5.4e-13	72133	Trub1	GO:0005739	mitochondrion	cellular_component	6
TRINITY_DN10859_c0_g1	MGI|MGI:1919383	52.8	5.4e-13	72133	Trub1	GO:0006396	RNA processing	biological_process	9
TRINITY_DN10859_c0_g1	MGI|MGI:1919383	52.8	5.4e-13	72133	Trub1	GO:0006400	tRNA modification	biological_process	12
TRINITY_DN10859_c0_g1	MGI|MGI:1919383	52.8	5.4e-13	72133	Trub1	GO:0008033	tRNA processing	biological_process	11
TRINITY_DN10859_c0_g1	MGI|MGI:1919383	52.8	5.4e-13	72133	Trub1	GO:0009451	RNA modification	biological_process	9
TRINITY_DN10859_c0_g1	MGI|MGI:1919383	52.8	5.4e-13	72133	Trub1	GO:0009982	pseudouridine synthase activity	molecular_function	6
TRINITY_DN10859_c0_g1	MGI|MGI:1919383	52.8	5.4e-13	72133	Trub1	GO:0016853	isomerase activity	molecular_function	4
TRINITY_DN10859_c0_g1	MGI|MGI:1919383	52.8	5.4e-13	72133	Trub1	GO:1990481	mRNA pseudouridine synthesis	biological_process	11
TRINITY_DN10862_c0_g2	ZFIN|ZDB-GENE-040801-265	60.8	2.3e-113	-	clptm1	GO:0003674	molecular_function	molecular_function	2
TRINITY_DN10862_c0_g2	ZFIN|ZDB-GENE-040801-265	60.8	2.3e-113	-	clptm1	GO:0005887	integral component of plasma membrane	cellular_component	6
TRINITY_DN10862_c0_g2	ZFIN|ZDB-GENE-040801-265	60.8	2.3e-113	-	clptm1	GO:0007275	multicellular organism development	biological_process	4
TRINITY_DN10862_c0_g2	ZFIN|ZDB-GENE-040801-265	60.8	2.3e-113	-	clptm1	GO:0016020	membrane	cellular_component	3
TRINITY_DN10862_c0_g2	ZFIN|ZDB-GENE-040801-265	60.8	2.3e-113	-	clptm1	GO:0016021	integral component of membrane	cellular_component	5
TRINITY_DN10862_c0_g2	ZFIN|ZDB-GENE-040801-265	60.8	2.3e-113	-	clptm1	GO:0030154	cell differentiation	biological_process	5
TRINITY_DN10862_c0_g3	UNIPROTKB|F1PJ80	41.8	4.8e-59	-	CLPTM1	GO:0009897	external side of plasma membrane	cellular_component	5
TRINITY_DN10862_c0_g3	UNIPROTKB|F1PJ80	41.8	4.8e-59	-	CLPTM1	GO:0016021	integral component of membrane	cellular_component	5
TRINITY_DN10862_c0_g3	UNIPROTKB|F1PJ80	41.8	4.8e-59	-	CLPTM1	GO:0033081	regulation of T cell differentiation in thymus	biological_process	10
TRINITY_DN10864_c0_g1	UNIPROTKB|Q16342	36.3	9.3e-68	5134	PDCD2	GO:0003677	DNA binding	molecular_function	6
TRINITY_DN10864_c0_g1	UNIPROTKB|Q16342	36.3	9.3e-68	5134	PDCD2	GO:0005515	protein binding	molecular_function	4
TRINITY_DN10864_c0_g1	UNIPROTKB|Q16342	36.3	9.3e-68	5134	PDCD2	GO:0005634	nucleus	cellular_component	6
TRINITY_DN10864_c0_g1	UNIPROTKB|Q16342	36.3	9.3e-68	5134	PDCD2	GO:0005737	cytoplasm	cellular_component	5
TRINITY_DN10864_c0_g1	UNIPROTKB|Q16342	36.3	9.3e-68	5134	PDCD2	GO:0006915	apoptotic process	biological_process	6
TRINITY_DN10864_c0_g1	UNIPROTKB|Q16342	36.3	9.3e-68	5134	PDCD2	GO:0006919	activation of cysteine-type endopeptidase activity involved in apoptotic process	biological_process	11
TRINITY_DN10864_c0_g1	UNIPROTKB|Q16342	36.3	9.3e-68	5134	PDCD2	GO:0019899	enzyme binding	molecular_function	5
TRINITY_DN10864_c0_g1	UNIPROTKB|Q16342	36.3	9.3e-68	5134	PDCD2	GO:0043065	positive regulation of apoptotic process	biological_process	9
TRINITY_DN10864_c0_g1	UNIPROTKB|Q16342	36.3	9.3e-68	5134	PDCD2	GO:0046872	metal ion binding	molecular_function	6
TRINITY_DN10864_c0_g1	UNIPROTKB|Q16342	36.3	9.3e-68	5134	PDCD2	GO:0070062	extracellular exosome	cellular_component	7
TRINITY_DN10864_c0_g1	UNIPROTKB|Q16342	36.3	9.3e-68	5134	PDCD2	GO:1901532	regulation of hematopoietic progenitor cell differentiation	biological_process	7
TRINITY_DN10864_c0_g1	UNIPROTKB|Q16342	36.3	9.3e-68	5134	PDCD2	GO:1902035	positive regulation of hematopoietic stem cell proliferation	biological_process	9
TRINITY_DN10868_c0_g1	UNIPROTKB|A8HME4	89.4	4.6e-38	5715531	RPS2	GO:0003735	structural constituent of ribosome	molecular_function	4
TRINITY_DN10868_c0_g1	UNIPROTKB|A8HME4	89.4	4.6e-38	5715531	RPS2	GO:0006412	translation	biological_process	8
TRINITY_DN10868_c0_g1	UNIPROTKB|A8HME4	89.4	4.6e-38	5715531	RPS2	GO:0022627	cytosolic small ribosomal subunit	cellular_component	8
TRINITY_DN10876_c0_g2	UNIPROTKB|Q8HCQ6	97	1.4e-49	6450155	ccmC	GO:0005739	mitochondrion	cellular_component	6
TRINITY_DN10876_c0_g2	UNIPROTKB|Q8HCQ6	97	1.4e-49	6450155	ccmC	GO:0005886	plasma membrane	cellular_component	4
TRINITY_DN10876_c0_g2	UNIPROTKB|Q8HCQ6	97	1.4e-49	6450155	ccmC	GO:0015886	heme transport	biological_process	7
TRINITY_DN10876_c0_g2	UNIPROTKB|Q8HCQ6	97	1.4e-49	6450155	ccmC	GO:0055114	oxidation-reduction process	biological_process	4
TRINITY_DN10884_c0_g1	FB|FBgn0011725	57	6.7e-130	42880	twin	GO:0000289	nuclear-transcribed mRNA poly(A) tail shortening	biological_process	12
TRINITY_DN10884_c0_g1	FB|FBgn0011725	57	6.7e-130	42880	twin	GO:0004535	poly(A)-specific ribonuclease activity	molecular_function	10
TRINITY_DN10884_c0_g1	FB|FBgn0011725	57	6.7e-130	42880	twin	GO:0005515	protein binding	molecular_function	4
TRINITY_DN10884_c0_g1	FB|FBgn0011725	57	6.7e-130	42880	twin	GO:0005737	cytoplasm	cellular_component	5
TRINITY_DN10884_c0_g1	FB|FBgn0011725	57	6.7e-130	42880	twin	GO:0005829	cytosol	cellular_component	6
TRINITY_DN10884_c0_g1	FB|FBgn0011725	57	6.7e-130	42880	twin	GO:0006402	mRNA catabolic process	biological_process	10
TRINITY_DN10884_c0_g1	FB|FBgn0011725	57	6.7e-130	42880	twin	GO:0017148	negative regulation of translation	biological_process	10
TRINITY_DN10884_c0_g1	FB|FBgn0011725	57	6.7e-130	42880	twin	GO:0030014	CCR4-NOT complex	cellular_component	4
TRINITY_DN10884_c0_g1	FB|FBgn0011725	57	6.7e-130	42880	twin	GO:0048132	female germ-line stem cell asymmetric division	biological_process	8
TRINITY_DN10884_c0_g1	FB|FBgn0011725	57	6.7e-130	42880	twin	GO:0048477	oogenesis	biological_process	6
TRINITY_DN108_c0_g1	FB|FBgn0003334	39.7	7.2e-10	41168	Scm	GO:0005515	protein binding	molecular_function	4
TRINITY_DN108_c0_g1	FB|FBgn0003334	39.7	7.2e-10	41168	Scm	GO:0005634	nucleus	cellular_component	6
TRINITY_DN108_c0_g1	FB|FBgn0003334	39.7	7.2e-10	41168	Scm	GO:0005700	polytene chromosome	cellular_component	7
TRINITY_DN108_c0_g1	FB|FBgn0003334	39.7	7.2e-10	41168	Scm	GO:0006355	regulation of transcription, DNA-templated	biological_process	8
TRINITY_DN108_c0_g1	FB|FBgn0003334	39.7	7.2e-10	41168	Scm	GO:0007409	axonogenesis	biological_process	9
TRINITY_DN108_c0_g1	FB|FBgn0003334	39.7	7.2e-10	41168	Scm	GO:0007419	ventral cord development	biological_process	6
TRINITY_DN108_c0_g1	FB|FBgn0003334	39.7	7.2e-10	41168	Scm	GO:0008270	zinc ion binding	molecular_function	8
TRINITY_DN108_c0_g1	FB|FBgn0003334	39.7	7.2e-10	41168	Scm	GO:0016458	gene silencing	biological_process	4
TRINITY_DN108_c0_g1	FB|FBgn0003334	39.7	7.2e-10	41168	Scm	GO:0022008	neurogenesis	biological_process	6
TRINITY_DN108_c0_g1	FB|FBgn0003334	39.7	7.2e-10	41168	Scm	GO:0030708	germarium-derived female germ-line cyst encapsulation	biological_process	7
TRINITY_DN108_c0_g1	FB|FBgn0003334	39.7	7.2e-10	41168	Scm	GO:0030713	ovarian follicle cell stalk formation	biological_process	8
TRINITY_DN108_c0_g1	FB|FBgn0003334	39.7	7.2e-10	41168	Scm	GO:0035102	PRC1 complex	cellular_component	7
TRINITY_DN108_c0_g1	FB|FBgn0003334	39.7	7.2e-10	41168	Scm	GO:0042802	identical protein binding	molecular_function	5
TRINITY_DN108_c0_g1	FB|FBgn0003334	39.7	7.2e-10	41168	Scm	GO:0045892	negative regulation of transcription, DNA-templated	biological_process	9
TRINITY_DN108_c0_g1	FB|FBgn0003334	39.7	7.2e-10	41168	Scm	GO:0045926	negative regulation of growth	biological_process	6
TRINITY_DN108_c0_g1	FB|FBgn0003334	39.7	7.2e-10	41168	Scm	GO:0048749	compound eye development	biological_process	8
TRINITY_DN10912_c0_g3	ZFIN|ZDB-GENE-081104-137	50.5	2.7e-43	-	dnajc25	GO:0016020	membrane	cellular_component	3
TRINITY_DN10912_c0_g3	ZFIN|ZDB-GENE-081104-137	50.5	2.7e-43	-	dnajc25	GO:0016021	integral component of membrane	cellular_component	5
TRINITY_DN10921_c0_g1	UNIPROTKB|C3Z724	78.3	8.6e-73	7216644	BRAFLDRAFT_259979	GO:0000209	protein polyubiquitination	biological_process	12
TRINITY_DN10921_c0_g1	UNIPROTKB|C3Z724	78.3	8.6e-73	7216644	BRAFLDRAFT_259979	GO:0004842	ubiquitin-protein transferase activity	molecular_function	6
TRINITY_DN10921_c0_g1	UNIPROTKB|C3Z724	78.3	8.6e-73	7216644	BRAFLDRAFT_259979	GO:0005634	nucleus	cellular_component	6
TRINITY_DN10921_c0_g1	UNIPROTKB|C3Z724	78.3	8.6e-73	7216644	BRAFLDRAFT_259979	GO:0005680	anaphase-promoting complex	cellular_component	7
TRINITY_DN10921_c0_g1	UNIPROTKB|C3Z724	78.3	8.6e-73	7216644	BRAFLDRAFT_259979	GO:0005737	cytoplasm	cellular_component	5
TRINITY_DN10921_c0_g1	UNIPROTKB|C3Z724	78.3	8.6e-73	7216644	BRAFLDRAFT_259979	GO:0006511	ubiquitin-dependent protein catabolic process	biological_process	10
TRINITY_DN10921_c0_g1	UNIPROTKB|C3Z724	78.3	8.6e-73	7216644	BRAFLDRAFT_259979	GO:0010458	exit from mitosis	biological_process	7
TRINITY_DN10921_c0_g1	UNIPROTKB|C3Z724	78.3	8.6e-73	7216644	BRAFLDRAFT_259979	GO:0010994	free ubiquitin chain polymerization	biological_process	9
TRINITY_DN10921_c0_g1	UNIPROTKB|C3Z724	78.3	8.6e-73	7216644	BRAFLDRAFT_259979	GO:0031145	anaphase-promoting complex-dependent catabolic process	biological_process	12
TRINITY_DN10921_c0_g1	UNIPROTKB|C3Z724	78.3	8.6e-73	7216644	BRAFLDRAFT_259979	GO:0031625	ubiquitin protein ligase binding	molecular_function	7
TRINITY_DN10921_c0_g1	UNIPROTKB|C3Z724	78.3	8.6e-73	7216644	BRAFLDRAFT_259979	GO:0061630	ubiquitin protein ligase activity	molecular_function	7
TRINITY_DN10921_c0_g1	UNIPROTKB|C3Z724	78.3	8.6e-73	7216644	BRAFLDRAFT_259979	GO:0070979	protein K11-linked ubiquitination	biological_process	13
TRINITY_DN10921_c0_g1	UNIPROTKB|C3Z724	78.3	8.6e-73	7216644	BRAFLDRAFT_259979	GO:1904668	positive regulation of ubiquitin protein ligase activity	biological_process	13
TRINITY_DN10945_c0_g1	UNIPROTKB|F1SN90	36.1	8e-06	100514386	SLC31A2	GO:0005375	copper ion transmembrane transporter activity	molecular_function	10
TRINITY_DN10945_c0_g1	UNIPROTKB|F1SN90	36.1	8e-06	100514386	SLC31A2	GO:0005770	late endosome	cellular_component	8
TRINITY_DN10945_c0_g1	UNIPROTKB|F1SN90	36.1	8e-06	100514386	SLC31A2	GO:0006878	cellular copper ion homeostasis	biological_process	12
TRINITY_DN10945_c0_g1	UNIPROTKB|F1SN90	36.1	8e-06	100514386	SLC31A2	GO:0016021	integral component of membrane	cellular_component	5
TRINITY_DN10945_c0_g1	UNIPROTKB|F1SN90	36.1	8e-06	100514386	SLC31A2	GO:0035434	copper ion transmembrane transport	biological_process	11
TRINITY_DN10945_c0_g1	UNIPROTKB|F1SN90	36.1	8e-06	100514386	SLC31A2	GO:0055037	recycling endosome	cellular_component	8
TRINITY_DN10945_c0_g1	UNIPROTKB|F1SN90	36.1	8e-06	100514386	SLC31A2	GO:1902311	regulation of copper ion transmembrane transport	biological_process	9
TRINITY_DN10954_c0_g1	MGI|MGI:1920657	29.4	5.5e-07	73407	Tepp	GO:0003674	molecular_function	molecular_function	2
TRINITY_DN10954_c0_g1	MGI|MGI:1920657	29.4	5.5e-07	73407	Tepp	GO:0005575	cellular_component	cellular_component	2
TRINITY_DN10954_c0_g1	MGI|MGI:1920657	29.4	5.5e-07	73407	Tepp	GO:0008150	biological_process	biological_process	2
TRINITY_DN10961_c0_g1	MGI|MGI:1915725	44.4	5.4e-14	68475	Ssna1	GO:0005634	nucleus	cellular_component	6
TRINITY_DN10961_c0_g1	MGI|MGI:1915725	44.4	5.4e-14	68475	Ssna1	GO:0005737	cytoplasm	cellular_component	5
TRINITY_DN10961_c0_g1	MGI|MGI:1915725	44.4	5.4e-14	68475	Ssna1	GO:0005813	centrosome	cellular_component	7
TRINITY_DN10961_c0_g1	MGI|MGI:1915725	44.4	5.4e-14	68475	Ssna1	GO:0005856	cytoskeleton	cellular_component	6
TRINITY_DN10961_c0_g1	MGI|MGI:1915725	44.4	5.4e-14	68475	Ssna1	GO:0005886	plasma membrane	cellular_component	4
TRINITY_DN10961_c0_g1	MGI|MGI:1915725	44.4	5.4e-14	68475	Ssna1	GO:0005929	cilium	cellular_component	4
TRINITY_DN10961_c0_g1	MGI|MGI:1915725	44.4	5.4e-14	68475	Ssna1	GO:0036064	ciliary basal body	cellular_component	7
TRINITY_DN10961_c0_g1	MGI|MGI:1915725	44.4	5.4e-14	68475	Ssna1	GO:0042073	intraciliary transport	biological_process	7
TRINITY_DN10961_c0_g1	MGI|MGI:1915725	44.4	5.4e-14	68475	Ssna1	GO:0042802	identical protein binding	molecular_function	5
TRINITY_DN10961_c0_g1	MGI|MGI:1915725	44.4	5.4e-14	68475	Ssna1	GO:0060830	ciliary receptor clustering involved in smoothened signaling pathway	biological_process	7
TRINITY_DN10961_c0_g2	RGD|620943	49.4	6.2e-73	117024	Crym	GO:0000122	negative regulation of transcription by RNA polymerase II	biological_process	10
TRINITY_DN10961_c0_g2	RGD|620943	49.4	6.2e-73	117024	Crym	GO:0003674	molecular_function	molecular_function	2
TRINITY_DN10961_c0_g2	RGD|620943	49.4	6.2e-73	117024	Crym	GO:0003714	transcription corepressor activity	molecular_function	5
TRINITY_DN10961_c0_g2	RGD|620943	49.4	6.2e-73	117024	Crym	GO:0005634	nucleus	cellular_component	6
TRINITY_DN10961_c0_g2	RGD|620943	49.4	6.2e-73	117024	Crym	GO:0005737	cytoplasm	cellular_component	5
TRINITY_DN10961_c0_g2	RGD|620943	49.4	6.2e-73	117024	Crym	GO:0005739	mitochondrion	cellular_component	6
TRINITY_DN10961_c0_g2	RGD|620943	49.4	6.2e-73	117024	Crym	GO:0005829	cytosol	cellular_component	6
TRINITY_DN10961_c0_g2	RGD|620943	49.4	6.2e-73	117024	Crym	GO:0006839	mitochondrial transport	biological_process	6
TRINITY_DN10961_c0_g2	RGD|620943	49.4	6.2e-73	117024	Crym	GO:0007605	sensory perception of sound	biological_process	8
TRINITY_DN10961_c0_g2	RGD|620943	49.4	6.2e-73	117024	Crym	GO:0009725	response to hormone	biological_process	5
TRINITY_DN10961_c0_g2	RGD|620943	49.4	6.2e-73	117024	Crym	GO:0016639	oxidoreductase activity, acting on the CH-NH2 group of donors, NAD or NADP as acceptor	molecular_function	6
TRINITY_DN10961_c0_g2	RGD|620943	49.4	6.2e-73	117024	Crym	GO:0033280	response to vitamin D	biological_process	7
TRINITY_DN10961_c0_g2	RGD|620943	49.4	6.2e-73	117024	Crym	GO:0042403	thyroid hormone metabolic process	biological_process	6
TRINITY_DN10961_c0_g2	RGD|620943	49.4	6.2e-73	117024	Crym	GO:0042562	hormone binding	molecular_function	4
TRINITY_DN10961_c0_g2	RGD|620943	49.4	6.2e-73	117024	Crym	GO:0042803	protein homodimerization activity	molecular_function	6
TRINITY_DN10961_c0_g2	RGD|620943	49.4	6.2e-73	117024	Crym	GO:0047127	thiomorpholine-carboxylate dehydrogenase activity	molecular_function	7
TRINITY_DN10961_c0_g2	RGD|620943	49.4	6.2e-73	117024	Crym	GO:0050661	NADP binding	molecular_function	6
TRINITY_DN10961_c0_g2	RGD|620943	49.4	6.2e-73	117024	Crym	GO:0055114	oxidation-reduction process	biological_process	4
TRINITY_DN10961_c0_g2	RGD|620943	49.4	6.2e-73	117024	Crym	GO:0070062	extracellular exosome	cellular_component	7
TRINITY_DN10961_c0_g2	RGD|620943	49.4	6.2e-73	117024	Crym	GO:0070324	thyroid hormone binding	molecular_function	5
TRINITY_DN10961_c0_g2	RGD|620943	49.4	6.2e-73	117024	Crym	GO:0070327	thyroid hormone transport	biological_process	7
TRINITY_DN10972_c0_g1	UNIPROTKB|Q81LD6	56.5	1.1e-20	1083730	maf	GO:0000917	division septum assembly	biological_process	7
TRINITY_DN10972_c0_g1	UNIPROTKB|Q81LD6	56.5	1.1e-20	1083730	maf	GO:0003674	molecular_function	molecular_function	2
TRINITY_DN10972_c0_g1	UNIPROTKB|Q81LD6	56.5	1.1e-20	1083730	maf	GO:0030428	cell septum	cellular_component	4
TRINITY_DN10973_c0_g2	UNIPROTKB|Q5LR21	37.2	3.1e-14	-	SPO2311	GO:0003674	molecular_function	molecular_function	2
TRINITY_DN10973_c0_g2	UNIPROTKB|Q5LR21	37.2	3.1e-14	-	SPO2311	GO:0005575	cellular_component	cellular_component	2
TRINITY_DN10973_c0_g2	UNIPROTKB|Q5LR21	37.2	3.1e-14	-	SPO2311	GO:0008150	biological_process	biological_process	2
TRINITY_DN10975_c1_g1	UNIPROTKB|A7RN38	77.4	9.4e-118	5519153	v1g239511	GO:0003735	structural constituent of ribosome	molecular_function	4
TRINITY_DN10975_c1_g1	UNIPROTKB|A7RN38	77.4	9.4e-118	5519153	v1g239511	GO:0006412	translation	biological_process	8
TRINITY_DN10977_c0_g1	UNIPROTKB|Q01859	86.5	8.3e-38	4339546	ATPB	GO:0005524	ATP binding	molecular_function	5
TRINITY_DN10977_c0_g1	UNIPROTKB|Q01859	86.5	8.3e-38	4339546	ATPB	GO:0015986	ATP synthesis coupled proton transport	biological_process	13
TRINITY_DN1097_c0_g1	ZFIN|ZDB-GENE-050417-83	40.5	3.4e-64	-	abhd4	GO:0016787	hydrolase activity	molecular_function	4
TRINITY_DN10982_c0_g1	TAIR|locus:2160130	94.1	2.4e-49	835567	THI1	GO:0005506	iron ion binding	molecular_function	8
TRINITY_DN10982_c0_g1	TAIR|locus:2160130	94.1	2.4e-49	835567	THI1	GO:0005739	mitochondrion	cellular_component	6
TRINITY_DN10982_c0_g1	TAIR|locus:2160130	94.1	2.4e-49	835567	THI1	GO:0005829	cytosol	cellular_component	6
TRINITY_DN10982_c0_g1	TAIR|locus:2160130	94.1	2.4e-49	835567	THI1	GO:0005886	plasma membrane	cellular_component	4
TRINITY_DN10982_c0_g1	TAIR|locus:2160130	94.1	2.4e-49	835567	THI1	GO:0006974	cellular response to DNA damage stimulus	biological_process	6
TRINITY_DN10982_c0_g1	TAIR|locus:2160130	94.1	2.4e-49	835567	THI1	GO:0008270	zinc ion binding	molecular_function	8
TRINITY_DN10982_c0_g1	TAIR|locus:2160130	94.1	2.4e-49	835567	THI1	GO:0009228	thiamine biosynthetic process	biological_process	8
TRINITY_DN10982_c0_g1	TAIR|locus:2160130	94.1	2.4e-49	835567	THI1	GO:0009409	response to cold	biological_process	5
TRINITY_DN10982_c0_g1	TAIR|locus:2160130	94.1	2.4e-49	835567	THI1	GO:0009507	chloroplast	cellular_component	7
TRINITY_DN10982_c0_g1	TAIR|locus:2160130	94.1	2.4e-49	835567	THI1	GO:0009570	chloroplast stroma	cellular_component	8
TRINITY_DN10982_c0_g1	TAIR|locus:2160130	94.1	2.4e-49	835567	THI1	GO:0009579	thylakoid	cellular_component	5
TRINITY_DN10982_c0_g1	TAIR|locus:2160130	94.1	2.4e-49	835567	THI1	GO:0009941	chloroplast envelope	cellular_component	7
TRINITY_DN10982_c0_g1	TAIR|locus:2160130	94.1	2.4e-49	835567	THI1	GO:0010319	stromule	cellular_component	7
TRINITY_DN10982_c0_g1	TAIR|locus:2160130	94.1	2.4e-49	835567	THI1	GO:0018131	oxazole or thiazole biosynthetic process	biological_process	7
TRINITY_DN10982_c0_g1	TAIR|locus:2160130	94.1	2.4e-49	835567	THI1	GO:0042803	protein homodimerization activity	molecular_function	6
TRINITY_DN10982_c0_g1	TAIR|locus:2160130	94.1	2.4e-49	835567	THI1	GO:0052837	thiazole biosynthetic process	biological_process	8
TRINITY_DN10985_c0_g1	WB|WBGene00004949	46.9	7.4e-06	181002	sox-2	GO:0000977	RNA polymerase II regulatory region sequence-specific DNA binding	molecular_function	9
TRINITY_DN10985_c0_g1	WB|WBGene00004949	46.9	7.4e-06	181002	sox-2	GO:0003677	DNA binding	molecular_function	6
TRINITY_DN10985_c0_g1	WB|WBGene00004949	46.9	7.4e-06	181002	sox-2	GO:0005515	protein binding	molecular_function	4
TRINITY_DN10985_c0_g1	WB|WBGene00004949	46.9	7.4e-06	181002	sox-2	GO:0005634	nucleus	cellular_component	6
TRINITY_DN10985_c0_g1	WB|WBGene00004949	46.9	7.4e-06	181002	sox-2	GO:0006351	transcription, DNA-templated	biological_process	8
TRINITY_DN10985_c0_g1	WB|WBGene00004949	46.9	7.4e-06	181002	sox-2	GO:0006355	regulation of transcription, DNA-templated	biological_process	8
TRINITY_DN10985_c0_g1	WB|WBGene00004949	46.9	7.4e-06	181002	sox-2	GO:0030154	cell differentiation	biological_process	5
TRINITY_DN10985_c0_g1	WB|WBGene00004949	46.9	7.4e-06	181002	sox-2	GO:0048665	neuron fate specification	biological_process	6
TRINITY_DN10987_c0_g1	UNIPROTKB|Q6ITC7	82.1	5.1e-66	414782	RPS13	GO:0003729	mRNA binding	molecular_function	7
TRINITY_DN10987_c0_g1	UNIPROTKB|Q6ITC7	82.1	5.1e-66	414782	RPS13	GO:0003735	structural constituent of ribosome	molecular_function	4
TRINITY_DN10987_c0_g1	UNIPROTKB|Q6ITC7	82.1	5.1e-66	414782	RPS13	GO:0005730	nucleolus	cellular_component	6
TRINITY_DN10987_c0_g1	UNIPROTKB|Q6ITC7	82.1	5.1e-66	414782	RPS13	GO:0005925	focal adhesion	cellular_component	7
TRINITY_DN10987_c0_g1	UNIPROTKB|Q6ITC7	82.1	5.1e-66	414782	RPS13	GO:0006412	translation	biological_process	8
TRINITY_DN10987_c0_g1	UNIPROTKB|Q6ITC7	82.1	5.1e-66	414782	RPS13	GO:0016020	membrane	cellular_component	3
TRINITY_DN10987_c0_g1	UNIPROTKB|Q6ITC7	82.1	5.1e-66	414782	RPS13	GO:0022627	cytosolic small ribosomal subunit	cellular_component	8
TRINITY_DN10987_c0_g1	UNIPROTKB|Q6ITC7	82.1	5.1e-66	414782	RPS13	GO:0033119	negative regulation of RNA splicing	biological_process	9
TRINITY_DN10987_c0_g1	UNIPROTKB|Q6ITC7	82.1	5.1e-66	414782	RPS13	GO:0070062	extracellular exosome	cellular_component	7
TRINITY_DN10987_c0_g1	UNIPROTKB|Q6ITC7	82.1	5.1e-66	414782	RPS13	GO:0070181	small ribosomal subunit rRNA binding	molecular_function	8
TRINITY_DN11019_c0_g1	FB|FBgn0014857	99.3	1.7e-67	31848	His3.3A	GO:0000786	nucleosome	cellular_component	5
TRINITY_DN11019_c0_g1	FB|FBgn0014857	99.3	1.7e-67	31848	His3.3A	GO:0003677	DNA binding	molecular_function	6
TRINITY_DN11019_c0_g1	FB|FBgn0014857	99.3	1.7e-67	31848	His3.3A	GO:0005700	polytene chromosome	cellular_component	7
TRINITY_DN11019_c0_g1	FB|FBgn0014857	99.3	1.7e-67	31848	His3.3A	GO:0007140	male meiotic nuclear division	biological_process	5
TRINITY_DN11019_c0_g1	FB|FBgn0014857	99.3	1.7e-67	31848	His3.3A	GO:0046982	protein heterodimerization activity	molecular_function	6
TRINITY_DN11026_c0_g1	CGD|CAL0000159333	54.7	1.6e-46	8049908	Cd36_34290	GO:0005525	GTP binding	molecular_function	8
TRINITY_DN11026_c0_g1	CGD|CAL0000159333	54.7	1.6e-46	8049908	Cd36_34290	GO:0005622	intracellular	cellular_component	4
TRINITY_DN11026_c0_g1	CGD|CAL0000159333	54.7	1.6e-46	8049908	Cd36_34290	GO:0007264	small GTPase mediated signal transduction	biological_process	6
TRINITY_DN11031_c0_g2	ZFIN|ZDB-GENE-070615-15	47.6	1.9e-27	568092	tmem17	GO:0003674	molecular_function	molecular_function	2
TRINITY_DN11031_c0_g2	ZFIN|ZDB-GENE-070615-15	47.6	1.9e-27	568092	tmem17	GO:0005886	plasma membrane	cellular_component	4
TRINITY_DN11031_c0_g2	ZFIN|ZDB-GENE-070615-15	47.6	1.9e-27	568092	tmem17	GO:0005929	cilium	cellular_component	4
TRINITY_DN11031_c0_g2	ZFIN|ZDB-GENE-070615-15	47.6	1.9e-27	568092	tmem17	GO:0007224	smoothened signaling pathway	biological_process	6
TRINITY_DN11031_c0_g2	ZFIN|ZDB-GENE-070615-15	47.6	1.9e-27	568092	tmem17	GO:0016020	membrane	cellular_component	3
TRINITY_DN11031_c0_g2	ZFIN|ZDB-GENE-070615-15	47.6	1.9e-27	568092	tmem17	GO:0016021	integral component of membrane	cellular_component	5
TRINITY_DN11031_c0_g2	ZFIN|ZDB-GENE-070615-15	47.6	1.9e-27	568092	tmem17	GO:0030030	cell projection organization	biological_process	5
TRINITY_DN11031_c0_g2	ZFIN|ZDB-GENE-070615-15	47.6	1.9e-27	568092	tmem17	GO:0036038	MKS complex	cellular_component	4
TRINITY_DN11031_c0_g2	ZFIN|ZDB-GENE-070615-15	47.6	1.9e-27	568092	tmem17	GO:0042995	cell projection	cellular_component	4
TRINITY_DN11031_c0_g2	ZFIN|ZDB-GENE-070615-15	47.6	1.9e-27	568092	tmem17	GO:0060170	ciliary membrane	cellular_component	6
TRINITY_DN11031_c0_g2	ZFIN|ZDB-GENE-070615-15	47.6	1.9e-27	568092	tmem17	GO:0060271	cilium assembly	biological_process	7
TRINITY_DN11059_c0_g1	UNIPROTKB|B9HA17	89.4	4.2e-27	7495760	POPTR_0006s26660g	GO:0000054	ribosomal subunit export from nucleus	biological_process	8
TRINITY_DN11059_c0_g1	UNIPROTKB|B9HA17	89.4	4.2e-27	7495760	POPTR_0006s26660g	GO:0003924	GTPase activity	molecular_function	9
TRINITY_DN11059_c0_g1	UNIPROTKB|B9HA17	89.4	4.2e-27	7495760	POPTR_0006s26660g	GO:0005634	nucleus	cellular_component	6
TRINITY_DN11059_c0_g1	UNIPROTKB|B9HA17	89.4	4.2e-27	7495760	POPTR_0006s26660g	GO:0005737	cytoplasm	cellular_component	5
TRINITY_DN11059_c0_g1	UNIPROTKB|B9HA17	89.4	4.2e-27	7495760	POPTR_0006s26660g	GO:0006606	protein import into nucleus	biological_process	11
TRINITY_DN1105_c0_g2	FB|FBgn0010348	51.5	5.8e-26	40506	Arf79F	GO:0001745	compound eye morphogenesis	biological_process	8
TRINITY_DN1105_c0_g2	FB|FBgn0010348	51.5	5.8e-26	40506	Arf79F	GO:0003924	GTPase activity	molecular_function	9
TRINITY_DN1105_c0_g2	FB|FBgn0010348	51.5	5.8e-26	40506	Arf79F	GO:0005525	GTP binding	molecular_function	8
TRINITY_DN1105_c0_g2	FB|FBgn0010348	51.5	5.8e-26	40506	Arf79F	GO:0005737	cytoplasm	cellular_component	5
TRINITY_DN1105_c0_g2	FB|FBgn0010348	51.5	5.8e-26	40506	Arf79F	GO:0005794	Golgi apparatus	cellular_component	6
TRINITY_DN1105_c0_g2	FB|FBgn0010348	51.5	5.8e-26	40506	Arf79F	GO:0005795	Golgi stack	cellular_component	7
TRINITY_DN1105_c0_g2	FB|FBgn0010348	51.5	5.8e-26	40506	Arf79F	GO:0006892	post-Golgi vesicle-mediated transport	biological_process	8
TRINITY_DN1105_c0_g2	FB|FBgn0010348	51.5	5.8e-26	40506	Arf79F	GO:0007112	male meiosis cytokinesis	biological_process	5
TRINITY_DN1105_c0_g2	FB|FBgn0010348	51.5	5.8e-26	40506	Arf79F	GO:0007269	neurotransmitter secretion	biological_process	6
TRINITY_DN1105_c0_g2	FB|FBgn0010348	51.5	5.8e-26	40506	Arf79F	GO:0010883	regulation of lipid storage	biological_process	5
TRINITY_DN1105_c0_g2	FB|FBgn0010348	51.5	5.8e-26	40506	Arf79F	GO:0032011	ARF protein signal transduction	biological_process	8
TRINITY_DN1105_c0_g2	FB|FBgn0010348	51.5	5.8e-26	40506	Arf79F	GO:0032154	cleavage furrow	cellular_component	5
TRINITY_DN1105_c0_g2	FB|FBgn0010348	51.5	5.8e-26	40506	Arf79F	GO:0043001	Golgi to plasma membrane protein transport	biological_process	10
TRINITY_DN1105_c0_g2	FB|FBgn0010348	51.5	5.8e-26	40506	Arf79F	GO:0043231	intracellular membrane-bounded organelle	cellular_component	5
TRINITY_DN1105_c0_g2	FB|FBgn0010348	51.5	5.8e-26	40506	Arf79F	GO:0045177	apical part of cell	cellular_component	4
TRINITY_DN1105_c0_g2	FB|FBgn0010348	51.5	5.8e-26	40506	Arf79F	GO:0045807	positive regulation of endocytosis	biological_process	8
TRINITY_DN1105_c0_g2	FB|FBgn0010348	51.5	5.8e-26	40506	Arf79F	GO:0048488	synaptic vesicle endocytosis	biological_process	9
TRINITY_DN1105_c0_g2	FB|FBgn0010348	51.5	5.8e-26	40506	Arf79F	GO:0048749	compound eye development	biological_process	8
TRINITY_DN1105_c0_g2	FB|FBgn0010348	51.5	5.8e-26	40506	Arf79F	GO:1902036	regulation of hematopoietic stem cell differentiation	biological_process	8
TRINITY_DN1105_c0_g2	FB|FBgn0010348	51.5	5.8e-26	40506	Arf79F	GO:1904801	positive regulation of neuron remodeling	biological_process	12
TRINITY_DN1105_c0_g2	FB|FBgn0010348	51.5	5.8e-26	40506	Arf79F	GO:1990386	mitotic cleavage furrow ingression	biological_process	7
TRINITY_DN11071_c0_g1	FB|FBgn0044028	30.9	5.1e-17	39751	Notum	GO:0004620	phospholipase activity	molecular_function	7
TRINITY_DN11071_c0_g1	FB|FBgn0044028	30.9	5.1e-17	39751	Notum	GO:0005615	extracellular space	cellular_component	4
TRINITY_DN11071_c0_g1	FB|FBgn0044028	30.9	5.1e-17	39751	Notum	GO:0006029	proteoglycan metabolic process	biological_process	8
TRINITY_DN11071_c0_g1	FB|FBgn0044028	30.9	5.1e-17	39751	Notum	GO:0006507	GPI anchor release	biological_process	10
TRINITY_DN11071_c0_g1	FB|FBgn0044028	30.9	5.1e-17	39751	Notum	GO:0007419	ventral cord development	biological_process	6
TRINITY_DN11071_c0_g1	FB|FBgn0044028	30.9	5.1e-17	39751	Notum	GO:0016055	Wnt signaling pathway	biological_process	7
TRINITY_DN11071_c0_g1	FB|FBgn0044028	30.9	5.1e-17	39751	Notum	GO:0019213	deacetylase activity	molecular_function	5
TRINITY_DN11071_c0_g1	FB|FBgn0044028	30.9	5.1e-17	39751	Notum	GO:0030178	negative regulation of Wnt signaling pathway	biological_process	9
TRINITY_DN11071_c0_g1	FB|FBgn0044028	30.9	5.1e-17	39751	Notum	GO:0048076	regulation of compound eye pigmentation	biological_process	7
TRINITY_DN11071_c0_g1	FB|FBgn0044028	30.9	5.1e-17	39751	Notum	GO:0048190	wing disc dorsal/ventral pattern formation	biological_process	8
TRINITY_DN11071_c0_g1	FB|FBgn0044028	30.9	5.1e-17	39751	Notum	GO:0052689	carboxylic ester hydrolase activity	molecular_function	6
TRINITY_DN11071_c0_g1	FB|FBgn0044028	30.9	5.1e-17	39751	Notum	GO:0090090	negative regulation of canonical Wnt signaling pathway	biological_process	10
TRINITY_DN11071_c0_g1	FB|FBgn0044028	30.9	5.1e-17	39751	Notum	GO:1990697	protein depalmitoleylation	biological_process	10
TRINITY_DN11071_c0_g1	FB|FBgn0044028	30.9	5.1e-17	39751	Notum	GO:1990699	palmitoleyl hydrolase activity	molecular_function	7
TRINITY_DN11073_c1_g1	UNIPROTKB|Q6DFM9	41.5	2.1e-19	448537	tomm20	GO:0005742	mitochondrial outer membrane translocase complex	cellular_component	6
TRINITY_DN11073_c1_g1	UNIPROTKB|Q6DFM9	41.5	2.1e-19	448537	tomm20	GO:0015450	P-P-bond-hydrolysis-driven protein transmembrane transporter activity	molecular_function	7
TRINITY_DN11073_c1_g1	UNIPROTKB|Q6DFM9	41.5	2.1e-19	448537	tomm20	GO:0016031	tRNA import into mitochondrion	biological_process	11
TRINITY_DN11073_c1_g1	UNIPROTKB|Q6DFM9	41.5	2.1e-19	448537	tomm20	GO:0030150	protein import into mitochondrial matrix	biological_process	12
TRINITY_DN11073_c1_g1	UNIPROTKB|Q6DFM9	41.5	2.1e-19	448537	tomm20	GO:0030943	mitochondrion targeting sequence binding	molecular_function	7
TRINITY_DN11073_c1_g1	UNIPROTKB|Q6DFM9	41.5	2.1e-19	448537	tomm20	GO:0031307	integral component of mitochondrial outer membrane	cellular_component	8
TRINITY_DN11073_c1_g1	UNIPROTKB|Q6DFM9	41.5	2.1e-19	448537	tomm20	GO:0070096	mitochondrial outer membrane translocase complex assembly	biological_process	8
TRINITY_DN11092_c0_g1	UNIPROTKB|R4GIG0	46.2	1.4e-43	427384	TNFAIP8	GO:0005737	cytoplasm	cellular_component	5
TRINITY_DN11092_c0_g1	UNIPROTKB|R4GIG0	46.2	1.4e-43	427384	TNFAIP8	GO:0043027	cysteine-type endopeptidase inhibitor activity involved in apoptotic process	molecular_function	9
TRINITY_DN11092_c0_g1	UNIPROTKB|R4GIG0	46.2	1.4e-43	427384	TNFAIP8	GO:0043154	negative regulation of cysteine-type endopeptidase activity involved in apoptotic process	biological_process	10
TRINITY_DN11101_c0_g1	UNIPROTKB|F6VA59	69.5	8.1e-63	-	NAA50	GO:0004596	peptide alpha-N-acetyltransferase activity	molecular_function	10
TRINITY_DN11101_c0_g1	UNIPROTKB|F6VA59	69.5	8.1e-63	-	NAA50	GO:0006474	N-terminal protein amino acid acetylation	biological_process	11
TRINITY_DN11101_c0_g1	UNIPROTKB|F6VA59	69.5	8.1e-63	-	NAA50	GO:0031248	protein acetyltransferase complex	cellular_component	5
TRINITY_DN11108_c0_g1	UNIPROTKB|E2R2R0	32	1.3e-16	610958	RAB26	GO:0000139	Golgi membrane	cellular_component	7
TRINITY_DN11108_c0_g1	UNIPROTKB|E2R2R0	32	1.3e-16	610958	RAB26	GO:0005525	GTP binding	molecular_function	8
TRINITY_DN11108_c0_g1	UNIPROTKB|E2R2R0	32	1.3e-16	610958	RAB26	GO:0007264	small GTPase mediated signal transduction	biological_process	6
TRINITY_DN11108_c0_g1	UNIPROTKB|E2R2R0	32	1.3e-16	610958	RAB26	GO:0019002	GMP binding	molecular_function	8
TRINITY_DN11108_c0_g1	UNIPROTKB|E2R2R0	32	1.3e-16	610958	RAB26	GO:0030667	secretory granule membrane	cellular_component	7
TRINITY_DN11108_c0_g1	UNIPROTKB|E2R2R0	32	1.3e-16	610958	RAB26	GO:0035272	exocrine system development	biological_process	6
TRINITY_DN11108_c0_g1	UNIPROTKB|E2R2R0	32	1.3e-16	610958	RAB26	GO:0043001	Golgi to plasma membrane protein transport	biological_process	10
TRINITY_DN11108_c0_g1	UNIPROTKB|E2R2R0	32	1.3e-16	610958	RAB26	GO:0045055	regulated exocytosis	biological_process	8
TRINITY_DN11112_c0_g1	UNIPROTKB|I1NBK8	95.8	8.2e-36	100788988	GLYMA_19G223300	GO:0004197	cysteine-type endopeptidase activity	molecular_function	8
TRINITY_DN11112_c0_g1	UNIPROTKB|I1NBK8	95.8	8.2e-36	100788988	GLYMA_19G223300	GO:0005615	extracellular space	cellular_component	4
TRINITY_DN11112_c0_g1	UNIPROTKB|I1NBK8	95.8	8.2e-36	100788988	GLYMA_19G223300	GO:0005764	lysosome	cellular_component	8
TRINITY_DN11112_c0_g1	UNIPROTKB|I1NBK8	95.8	8.2e-36	100788988	GLYMA_19G223300	GO:0051603	proteolysis involved in cellular protein catabolic process	biological_process	8
TRINITY_DN11114_c0_g2	UNIPROTKB|J9NT16	58.3	1e-24	-	EEF1B2	GO:0003746	translation elongation factor activity	molecular_function	8
TRINITY_DN11114_c0_g2	UNIPROTKB|J9NT16	58.3	1e-24	-	EEF1B2	GO:0005853	eukaryotic translation elongation factor 1 complex	cellular_component	4
TRINITY_DN11114_c0_g2	UNIPROTKB|J9NT16	58.3	1e-24	-	EEF1B2	GO:0006414	translational elongation	biological_process	8
TRINITY_DN11114_c0_g3	UNIPROTKB|Q9YGQ1	74	5.3e-38	395723	EEF1B	GO:0003746	translation elongation factor activity	molecular_function	8
TRINITY_DN11114_c0_g3	UNIPROTKB|Q9YGQ1	74	5.3e-38	395723	EEF1B	GO:0005853	eukaryotic translation elongation factor 1 complex	cellular_component	4
TRINITY_DN11114_c0_g3	UNIPROTKB|Q9YGQ1	74	5.3e-38	395723	EEF1B	GO:0006414	translational elongation	biological_process	8
TRINITY_DN11114_c0_g5	UNIPROTKB|G1KAH6	40.9	9.4e-19	-	G1KAH6	GO:0005737	cytoplasm	cellular_component	5
TRINITY_DN11114_c0_g5	UNIPROTKB|G1KAH6	40.9	9.4e-19	-	G1KAH6	GO:0008757	S-adenosylmethionine-dependent methyltransferase activity	molecular_function	7
TRINITY_DN11114_c0_g5	UNIPROTKB|G1KAH6	40.9	9.4e-19	-	G1KAH6	GO:0032259	methylation	biological_process	4
TRINITY_DN11137_c0_g1	UNIPROTKB|B3RT00	29.7	5.3e-25	6751819	TRIADDRAFT_54786	GO:0005739	mitochondrion	cellular_component	6
TRINITY_DN11137_c0_g1	UNIPROTKB|B3RT00	29.7	5.3e-25	6751819	TRIADDRAFT_54786	GO:0016020	membrane	cellular_component	3
TRINITY_DN11137_c0_g1	UNIPROTKB|B3RT00	29.7	5.3e-25	6751819	TRIADDRAFT_54786	GO:0043065	positive regulation of apoptotic process	biological_process	9
TRINITY_DN11155_c0_g1	UNIPROTKB|Q5ZHP3	99.3	4.1e-74	415627	CFAP20	GO:0005654	nucleoplasm	cellular_component	6
TRINITY_DN11155_c0_g1	UNIPROTKB|Q5ZHP3	99.3	4.1e-74	415627	CFAP20	GO:0005814	centriole	cellular_component	6
TRINITY_DN11155_c0_g1	UNIPROTKB|Q5ZHP3	99.3	4.1e-74	415627	CFAP20	GO:0005874	microtubule	cellular_component	7
TRINITY_DN11155_c0_g1	UNIPROTKB|Q5ZHP3	99.3	4.1e-74	415627	CFAP20	GO:0005929	cilium	cellular_component	4
TRINITY_DN11155_c0_g1	UNIPROTKB|Q5ZHP3	99.3	4.1e-74	415627	CFAP20	GO:0018095	protein polyglutamylation	biological_process	11
TRINITY_DN11155_c0_g1	UNIPROTKB|Q5ZHP3	99.3	4.1e-74	415627	CFAP20	GO:0036064	ciliary basal body	cellular_component	7
TRINITY_DN11155_c0_g1	UNIPROTKB|Q5ZHP3	99.3	4.1e-74	415627	CFAP20	GO:0060271	cilium assembly	biological_process	7
TRINITY_DN11155_c0_g1	UNIPROTKB|Q5ZHP3	99.3	4.1e-74	415627	CFAP20	GO:0060296	regulation of cilium beat frequency involved in ciliary motility	biological_process	10
TRINITY_DN11155_c0_g1	UNIPROTKB|Q5ZHP3	99.3	4.1e-74	415627	CFAP20	GO:0070062	extracellular exosome	cellular_component	7
TRINITY_DN11155_c0_g1	UNIPROTKB|Q5ZHP3	99.3	4.1e-74	415627	CFAP20	GO:2000147	positive regulation of cell motility	biological_process	7
TRINITY_DN11155_c0_g1	UNIPROTKB|Q5ZHP3	99.3	4.1e-74	415627	CFAP20	GO:2000253	positive regulation of feeding behavior	biological_process	7
TRINITY_DN11161_c0_g1	UNIPROTKB|C3YT49	49.6	4.9e-120	7253252	BRAFLDRAFT_284539	GO:0003690	double-stranded DNA binding	molecular_function	7
TRINITY_DN11161_c0_g1	UNIPROTKB|C3YT49	49.6	4.9e-120	7253252	BRAFLDRAFT_284539	GO:0046403	polynucleotide 3'-phosphatase activity	molecular_function	9
TRINITY_DN11161_c0_g1	UNIPROTKB|C3YT49	49.6	4.9e-120	7253252	BRAFLDRAFT_284539	GO:0046404	ATP-dependent polydeoxyribonucleotide 5'-hydroxyl-kinase activity	molecular_function	9
TRINITY_DN11161_c0_g1	UNIPROTKB|C3YT49	49.6	4.9e-120	7253252	BRAFLDRAFT_284539	GO:0098504	DNA 3' dephosphorylation involved in DNA repair	biological_process	10
TRINITY_DN11161_c0_g1	UNIPROTKB|C3YT49	49.6	4.9e-120	7253252	BRAFLDRAFT_284539	GO:0098506	polynucleotide 3' dephosphorylation	biological_process	8
TRINITY_DN11164_c0_g3	UNIPROTKB|A7SWD4	82.8	4.9e-96	5502970	v1g194235	GO:0002181	cytoplasmic translation	biological_process	9
TRINITY_DN11164_c0_g3	UNIPROTKB|A7SWD4	82.8	4.9e-96	5502970	v1g194235	GO:0003735	structural constituent of ribosome	molecular_function	4
TRINITY_DN11164_c0_g3	UNIPROTKB|A7SWD4	82.8	4.9e-96	5502970	v1g194235	GO:0022625	cytosolic large ribosomal subunit	cellular_component	8
TRINITY_DN11164_c0_g4	MGI|MGI:1916948	38.2	3.3e-59	69698	Slc52a3	GO:0005515	protein binding	molecular_function	4
TRINITY_DN11164_c0_g4	MGI|MGI:1916948	38.2	3.3e-59	69698	Slc52a3	GO:0005886	plasma membrane	cellular_component	4
TRINITY_DN11164_c0_g4	MGI|MGI:1916948	38.2	3.3e-59	69698	Slc52a3	GO:0005887	integral component of plasma membrane	cellular_component	6
TRINITY_DN11164_c0_g4	MGI|MGI:1916948	38.2	3.3e-59	69698	Slc52a3	GO:0007605	sensory perception of sound	biological_process	8
TRINITY_DN11164_c0_g4	MGI|MGI:1916948	38.2	3.3e-59	69698	Slc52a3	GO:0016020	membrane	cellular_component	3
TRINITY_DN11164_c0_g4	MGI|MGI:1916948	38.2	3.3e-59	69698	Slc52a3	GO:0016021	integral component of membrane	cellular_component	5
TRINITY_DN11164_c0_g4	MGI|MGI:1916948	38.2	3.3e-59	69698	Slc52a3	GO:0032217	riboflavin transmembrane transporter activity	molecular_function	8
TRINITY_DN11164_c0_g4	MGI|MGI:1916948	38.2	3.3e-59	69698	Slc52a3	GO:0032218	riboflavin transport	biological_process	9
TRINITY_DN11164_c0_g4	MGI|MGI:1916948	38.2	3.3e-59	69698	Slc52a3	GO:0034605	cellular response to heat	biological_process	6
TRINITY_DN11169_c0_g1	UNIPROTKB|P05055	70	1.6e-28	947672	pnp	GO:0000175	3'-5'-exoribonuclease activity	molecular_function	9
TRINITY_DN11169_c0_g1	UNIPROTKB|P05055	70	1.6e-28	947672	pnp	GO:0004654	polyribonucleotide nucleotidyltransferase activity	molecular_function	7
TRINITY_DN11169_c0_g1	UNIPROTKB|P05055	70	1.6e-28	947672	pnp	GO:0005515	protein binding	molecular_function	4
TRINITY_DN11169_c0_g1	UNIPROTKB|P05055	70	1.6e-28	947672	pnp	GO:0005829	cytosol	cellular_component	6
TRINITY_DN11169_c0_g1	UNIPROTKB|P05055	70	1.6e-28	947672	pnp	GO:0009408	response to heat	biological_process	5
TRINITY_DN11169_c0_g1	UNIPROTKB|P05055	70	1.6e-28	947672	pnp	GO:0016020	membrane	cellular_component	3
TRINITY_DN11169_c0_g1	UNIPROTKB|P05055	70	1.6e-28	947672	pnp	GO:0035438	cyclic-di-GMP binding	molecular_function	5
TRINITY_DN11169_c0_g1	UNIPROTKB|P05055	70	1.6e-28	947672	pnp	GO:0042802	identical protein binding	molecular_function	5
TRINITY_DN11169_c0_g1	UNIPROTKB|P05055	70	1.6e-28	947672	pnp	GO:0090503	RNA phosphodiester bond hydrolysis, exonucleolytic	biological_process	10
TRINITY_DN11171_c0_g1	UNIPROTKB|F6UJI4	50	4e-14	-	dpm2	GO:0004582	dolichyl-phosphate beta-D-mannosyltransferase activity	molecular_function	8
TRINITY_DN11171_c0_g1	UNIPROTKB|F6UJI4	50	4e-14	-	dpm2	GO:0005789	endoplasmic reticulum membrane	cellular_component	5
TRINITY_DN11171_c0_g1	UNIPROTKB|F6UJI4	50	4e-14	-	dpm2	GO:0006506	GPI anchor biosynthetic process	biological_process	10
TRINITY_DN11171_c0_g1	UNIPROTKB|F6UJI4	50	4e-14	-	dpm2	GO:0019348	dolichol metabolic process	biological_process	7
TRINITY_DN11171_c0_g1	UNIPROTKB|F6UJI4	50	4e-14	-	dpm2	GO:0030234	enzyme regulator activity	molecular_function	4
TRINITY_DN11171_c0_g1	UNIPROTKB|F6UJI4	50	4e-14	-	dpm2	GO:0033185	dolichol-phosphate-mannose synthase complex	cellular_component	6
TRINITY_DN11171_c0_g1	UNIPROTKB|F6UJI4	50	4e-14	-	dpm2	GO:0035269	protein O-linked mannosylation	biological_process	11
TRINITY_DN11206_c0_g1	UNIPROTKB|C3YFW7	33.3	5.9e-72	7221832	BRAFLDRAFT_206228	GO:0004322	ferroxidase activity	molecular_function	7
TRINITY_DN11206_c0_g1	UNIPROTKB|C3YFW7	33.3	5.9e-72	7221832	BRAFLDRAFT_206228	GO:0005381	iron ion transmembrane transporter activity	molecular_function	10
TRINITY_DN11206_c0_g1	UNIPROTKB|C3YFW7	33.3	5.9e-72	7221832	BRAFLDRAFT_206228	GO:0005507	copper ion binding	molecular_function	8
TRINITY_DN11206_c0_g1	UNIPROTKB|C3YFW7	33.3	5.9e-72	7221832	BRAFLDRAFT_206228	GO:0006826	iron ion transport	biological_process	10
TRINITY_DN11206_c0_g1	UNIPROTKB|C3YFW7	33.3	5.9e-72	7221832	BRAFLDRAFT_206228	GO:0033215	iron assimilation by reduction and transport	biological_process	12
TRINITY_DN11206_c0_g1	UNIPROTKB|C3YFW7	33.3	5.9e-72	7221832	BRAFLDRAFT_206228	GO:0033573	high-affinity iron permease complex	cellular_component	7
TRINITY_DN11207_c0_g1	UNIPROTKB|E9GUW1	61.8	1.5e-31	-	DAPPUDRAFT_231190	GO:0005764	lysosome	cellular_component	8
TRINITY_DN11207_c0_g1	UNIPROTKB|E9GUW1	61.8	1.5e-31	-	DAPPUDRAFT_231190	GO:0005770	late endosome	cellular_component	8
TRINITY_DN11207_c0_g1	UNIPROTKB|E9GUW1	61.8	1.5e-31	-	DAPPUDRAFT_231190	GO:0005774	vacuolar membrane	cellular_component	7
TRINITY_DN11207_c0_g1	UNIPROTKB|E9GUW1	61.8	1.5e-31	-	DAPPUDRAFT_231190	GO:0008333	endosome to lysosome transport	biological_process	8
TRINITY_DN11207_c0_g1	UNIPROTKB|E9GUW1	61.8	1.5e-31	-	DAPPUDRAFT_231190	GO:0045335	phagocytic vesicle	cellular_component	8
TRINITY_DN11207_c0_g1	UNIPROTKB|E9GUW1	61.8	1.5e-31	-	DAPPUDRAFT_231190	GO:0090385	phagosome-lysosome fusion	biological_process	8
TRINITY_DN11224_c0_g1	FB|FBgn0030992	31.9	1.1e-24	2768889	CG33253	GO:0003674	molecular_function	molecular_function	2
TRINITY_DN11224_c0_g1	FB|FBgn0030992	31.9	1.1e-24	2768889	CG33253	GO:0006909	phagocytosis	biological_process	7
TRINITY_DN11224_c0_g1	FB|FBgn0030992	31.9	1.1e-24	2768889	CG33253	GO:0016020	membrane	cellular_component	3
TRINITY_DN11232_c0_g1	ZFIN|ZDB-GENE-040801-40	56.9	1.8e-09	-	bag3	GO:0007519	skeletal muscle tissue development	biological_process	8
TRINITY_DN11232_c0_g1	ZFIN|ZDB-GENE-040801-40	56.9	1.8e-09	-	bag3	GO:0007626	locomotory behavior	biological_process	4
TRINITY_DN11232_c0_g1	ZFIN|ZDB-GENE-040801-40	56.9	1.8e-09	-	bag3	GO:0030018	Z disc	cellular_component	5
TRINITY_DN11232_c0_g1	ZFIN|ZDB-GENE-040801-40	56.9	1.8e-09	-	bag3	GO:0051087	chaperone binding	molecular_function	5
TRINITY_DN11232_c0_g1	ZFIN|ZDB-GENE-040801-40	56.9	1.8e-09	-	bag3	GO:0060047	heart contraction	biological_process	7
TRINITY_DN11250_c0_g1	UNIPROTKB|W4XK40	50	2e-31	582604	W4XK40	GO:0005829	cytosol	cellular_component	6
TRINITY_DN11250_c0_g1	UNIPROTKB|W4XK40	50	2e-31	582604	W4XK40	GO:0047134	protein-disulfide reductase activity	molecular_function	7
TRINITY_DN11251_c0_g1	UNIPROTKB|F6PHE6	53.6	1.9e-115	-	LOC100175060	GO:0006281	DNA repair	biological_process	8
TRINITY_DN11251_c0_g1	UNIPROTKB|F6PHE6	53.6	1.9e-115	-	LOC100175060	GO:0006337	nucleosome disassembly	biological_process	8
TRINITY_DN11251_c0_g1	UNIPROTKB|F6PHE6	53.6	1.9e-115	-	LOC100175060	GO:0006357	regulation of transcription by RNA polymerase II	biological_process	9
TRINITY_DN11251_c0_g1	UNIPROTKB|F6PHE6	53.6	1.9e-115	-	LOC100175060	GO:0008285	negative regulation of cell proliferation	biological_process	7
TRINITY_DN11251_c0_g1	UNIPROTKB|F6PHE6	53.6	1.9e-115	-	LOC100175060	GO:0030154	cell differentiation	biological_process	5
TRINITY_DN11251_c0_g1	UNIPROTKB|F6PHE6	53.6	1.9e-115	-	LOC100175060	GO:0043044	ATP-dependent chromatin remodeling	biological_process	7
TRINITY_DN11283_c0_g1	ZFIN|ZDB-GENE-060825-85	51.8	1.1e-56	751724	kctd2	GO:0031463	Cul3-RING ubiquitin ligase complex	cellular_component	7
TRINITY_DN11283_c0_g1	ZFIN|ZDB-GENE-060825-85	51.8	1.1e-56	751724	kctd2	GO:0043161	proteasome-mediated ubiquitin-dependent protein catabolic process	biological_process	11
TRINITY_DN11283_c0_g1	ZFIN|ZDB-GENE-060825-85	51.8	1.1e-56	751724	kctd2	GO:0051260	protein homooligomerization	biological_process	8
TRINITY_DN11283_c0_g1	ZFIN|ZDB-GENE-060825-85	51.8	1.1e-56	751724	kctd2	GO:0097602	cullin family protein binding	molecular_function	5
TRINITY_DN11287_c0_g1	ZFIN|ZDB-GENE-050522-182	38.5	9.8e-14	553721	rpp14	GO:0004540	ribonuclease activity	molecular_function	7
TRINITY_DN11287_c0_g1	ZFIN|ZDB-GENE-050522-182	38.5	9.8e-14	553721	rpp14	GO:0005575	cellular_component	cellular_component	2
TRINITY_DN11287_c0_g1	ZFIN|ZDB-GENE-050522-182	38.5	9.8e-14	553721	rpp14	GO:0008033	tRNA processing	biological_process	11
TRINITY_DN11289_c0_g1	ZFIN|ZDB-GENE-050417-153	60.6	2.9e-37	-	spata4	GO:0003674	molecular_function	molecular_function	2
TRINITY_DN11289_c0_g1	ZFIN|ZDB-GENE-050417-153	60.6	2.9e-37	-	spata4	GO:0005575	cellular_component	cellular_component	2
TRINITY_DN11296_c0_g1	UNIPROTKB|W4XWW8	38.9	1.9e-11	100891312	Sp-Dnase1	GO:0005634	nucleus	cellular_component	6
TRINITY_DN11307_c0_g2	UNIPROTKB|Q4K3A7	60.5	1.9e-20	29824419	atpA	GO:0015986	ATP synthesis coupled proton transport	biological_process	13
TRINITY_DN11307_c0_g2	UNIPROTKB|Q4K3A7	60.5	1.9e-20	29824419	atpA	GO:0045262	plasma membrane proton-transporting ATP synthase complex, catalytic core F(1)	cellular_component	7
TRINITY_DN11307_c0_g2	UNIPROTKB|Q4K3A7	60.5	1.9e-20	29824419	atpA	GO:0046933	proton-transporting ATP synthase activity, rotational mechanism	molecular_function	10
TRINITY_DN11309_c0_g1	UNIPROTKB|I1JYG3	93.3	1.7e-50	-	GLYMA_04G226900	GO:0002181	cytoplasmic translation	biological_process	9
TRINITY_DN11309_c0_g1	UNIPROTKB|I1JYG3	93.3	1.7e-50	-	GLYMA_04G226900	GO:0003723	RNA binding	molecular_function	6
TRINITY_DN11309_c0_g1	UNIPROTKB|I1JYG3	93.3	1.7e-50	-	GLYMA_04G226900	GO:0003735	structural constituent of ribosome	molecular_function	4
TRINITY_DN11309_c0_g1	UNIPROTKB|I1JYG3	93.3	1.7e-50	-	GLYMA_04G226900	GO:0022625	cytosolic large ribosomal subunit	cellular_component	8
TRINITY_DN11311_c0_g2	UNIPROTKB|B3RY36	32.2	1.6e-27	6754072	TRIADDRAFT_56425	GO:0004842	ubiquitin-protein transferase activity	molecular_function	6
TRINITY_DN11311_c0_g2	UNIPROTKB|B3RY36	32.2	1.6e-27	6754072	TRIADDRAFT_56425	GO:0005634	nucleus	cellular_component	6
TRINITY_DN11311_c0_g2	UNIPROTKB|B3RY36	32.2	1.6e-27	6754072	TRIADDRAFT_56425	GO:0005737	cytoplasm	cellular_component	5
TRINITY_DN11311_c0_g5	ZFIN|ZDB-GENE-030131-8542	36.2	2.5e-16	-	herc1	GO:0004842	ubiquitin-protein transferase activity	molecular_function	6
TRINITY_DN11311_c0_g5	ZFIN|ZDB-GENE-030131-8542	36.2	2.5e-16	-	herc1	GO:0016740	transferase activity	molecular_function	4
TRINITY_DN11338_c2_g1	UNIPROTKB|Q3T168	43.4	1.8e-11	618428	CACYBP	GO:0005641	nuclear envelope lumen	cellular_component	6
TRINITY_DN11338_c2_g1	UNIPROTKB|Q3T168	43.4	1.8e-11	618428	CACYBP	GO:0005654	nucleoplasm	cellular_component	6
TRINITY_DN11338_c2_g1	UNIPROTKB|Q3T168	43.4	1.8e-11	618428	CACYBP	GO:0030877	beta-catenin destruction complex	cellular_component	4
TRINITY_DN11338_c2_g1	UNIPROTKB|Q3T168	43.4	1.8e-11	618428	CACYBP	GO:0042803	protein homodimerization activity	molecular_function	6
TRINITY_DN11338_c2_g1	UNIPROTKB|Q3T168	43.4	1.8e-11	618428	CACYBP	GO:0070062	extracellular exosome	cellular_component	7
TRINITY_DN11344_c0_g1	UNIPROTKB|Q04967	50.4	1.1e-146	396906	HSPA6	GO:0005524	ATP binding	molecular_function	5
TRINITY_DN11353_c1_g1	TAIR|locus:2132977	93.9	2.7e-31	828909	UBC9	GO:0004842	ubiquitin-protein transferase activity	molecular_function	6
TRINITY_DN11353_c1_g1	TAIR|locus:2132977	93.9	2.7e-31	828909	UBC9	GO:0005524	ATP binding	molecular_function	5
TRINITY_DN11353_c1_g1	TAIR|locus:2132977	93.9	2.7e-31	828909	UBC9	GO:0005737	cytoplasm	cellular_component	5
TRINITY_DN11353_c1_g1	TAIR|locus:2132977	93.9	2.7e-31	828909	UBC9	GO:0006511	ubiquitin-dependent protein catabolic process	biological_process	10
TRINITY_DN11353_c1_g1	TAIR|locus:2132977	93.9	2.7e-31	828909	UBC9	GO:0016740	transferase activity	molecular_function	4
TRINITY_DN11353_c1_g1	TAIR|locus:2132977	93.9	2.7e-31	828909	UBC9	GO:0016925	protein sumoylation	biological_process	11
TRINITY_DN11353_c1_g2	UNIPROTKB|Q8S919	93.4	3.7e-28	4328940	UBC5B	GO:0004842	ubiquitin-protein transferase activity	molecular_function	6
TRINITY_DN11353_c1_g2	UNIPROTKB|Q8S919	93.4	3.7e-28	4328940	UBC5B	GO:0016567	protein ubiquitination	biological_process	11
TRINITY_DN11354_c1_g1	UNIPROTKB|F1PFU6	59	4.4e-47	-	JMJD8	GO:0070062	extracellular exosome	cellular_component	7
TRINITY_DN11369_c0_g1	RGD|1564442	40.2	1e-36	288707	Gltp	GO:0005829	cytosol	cellular_component	6
TRINITY_DN11369_c0_g1	RGD|1564442	40.2	1e-36	288707	Gltp	GO:0008289	lipid binding	molecular_function	4
TRINITY_DN11369_c0_g1	RGD|1564442	40.2	1e-36	288707	Gltp	GO:0016020	membrane	cellular_component	3
TRINITY_DN11369_c0_g1	RGD|1564442	40.2	1e-36	288707	Gltp	GO:0042802	identical protein binding	molecular_function	5
TRINITY_DN11369_c0_g1	RGD|1564442	40.2	1e-36	288707	Gltp	GO:0051861	glycolipid binding	molecular_function	5
TRINITY_DN11369_c0_g1	RGD|1564442	40.2	1e-36	288707	Gltp	GO:0070062	extracellular exosome	cellular_component	7
TRINITY_DN11369_c0_g1	RGD|1564442	40.2	1e-36	288707	Gltp	GO:0120009	intermembrane lipid transfer	biological_process	8
TRINITY_DN11369_c0_g1	RGD|1564442	40.2	1e-36	288707	Gltp	GO:0120013	intermembrane lipid transfer activity	molecular_function	4
TRINITY_DN11370_c0_g1	ZFIN|ZDB-GENE-030131-9320	30.8	4.6e-34	570584	moxd1	GO:0003824	catalytic activity	molecular_function	3
TRINITY_DN11370_c0_g1	ZFIN|ZDB-GENE-030131-9320	30.8	4.6e-34	570584	moxd1	GO:0004497	monooxygenase activity	molecular_function	5
TRINITY_DN11370_c0_g1	ZFIN|ZDB-GENE-030131-9320	30.8	4.6e-34	570584	moxd1	GO:0004500	dopamine beta-monooxygenase activity	molecular_function	7
TRINITY_DN11370_c0_g1	ZFIN|ZDB-GENE-030131-9320	30.8	4.6e-34	570584	moxd1	GO:0005507	copper ion binding	molecular_function	8
TRINITY_DN11370_c0_g1	ZFIN|ZDB-GENE-030131-9320	30.8	4.6e-34	570584	moxd1	GO:0005615	extracellular space	cellular_component	4
TRINITY_DN11370_c0_g1	ZFIN|ZDB-GENE-030131-9320	30.8	4.6e-34	570584	moxd1	GO:0005783	endoplasmic reticulum	cellular_component	6
TRINITY_DN11370_c0_g1	ZFIN|ZDB-GENE-030131-9320	30.8	4.6e-34	570584	moxd1	GO:0005789	endoplasmic reticulum membrane	cellular_component	5
TRINITY_DN11370_c0_g1	ZFIN|ZDB-GENE-030131-9320	30.8	4.6e-34	570584	moxd1	GO:0006589	octopamine biosynthetic process	biological_process	8
TRINITY_DN11370_c0_g1	ZFIN|ZDB-GENE-030131-9320	30.8	4.6e-34	570584	moxd1	GO:0016020	membrane	cellular_component	3
TRINITY_DN11370_c0_g1	ZFIN|ZDB-GENE-030131-9320	30.8	4.6e-34	570584	moxd1	GO:0016021	integral component of membrane	cellular_component	5
TRINITY_DN11370_c0_g1	ZFIN|ZDB-GENE-030131-9320	30.8	4.6e-34	570584	moxd1	GO:0016491	oxidoreductase activity	molecular_function	4
TRINITY_DN11370_c0_g1	ZFIN|ZDB-GENE-030131-9320	30.8	4.6e-34	570584	moxd1	GO:0016715	oxidoreductase activity, acting on paired donors, with incorporation or reduction of molecular oxygen, reduced ascorbate as one donor, and incorporation of one atom of oxygen	molecular_function	6
TRINITY_DN11370_c0_g1	ZFIN|ZDB-GENE-030131-9320	30.8	4.6e-34	570584	moxd1	GO:0030667	secretory granule membrane	cellular_component	7
TRINITY_DN11370_c0_g1	ZFIN|ZDB-GENE-030131-9320	30.8	4.6e-34	570584	moxd1	GO:0042420	dopamine catabolic process	biological_process	10
TRINITY_DN11370_c0_g1	ZFIN|ZDB-GENE-030131-9320	30.8	4.6e-34	570584	moxd1	GO:0042421	norepinephrine biosynthetic process	biological_process	10
TRINITY_DN11370_c0_g1	ZFIN|ZDB-GENE-030131-9320	30.8	4.6e-34	570584	moxd1	GO:0046872	metal ion binding	molecular_function	6
TRINITY_DN11370_c0_g1	ZFIN|ZDB-GENE-030131-9320	30.8	4.6e-34	570584	moxd1	GO:0055114	oxidation-reduction process	biological_process	4
TRINITY_DN11373_c0_g1	UNIPROTKB|E1C2M2	25.8	7.9e-08	770435	DUSP8	GO:0000188	inactivation of MAPK activity	biological_process	13
TRINITY_DN11373_c0_g1	UNIPROTKB|E1C2M2	25.8	7.9e-08	770435	DUSP8	GO:0004725	protein tyrosine phosphatase activity	molecular_function	9
TRINITY_DN11373_c0_g1	UNIPROTKB|E1C2M2	25.8	7.9e-08	770435	DUSP8	GO:0017017	MAP kinase tyrosine/serine/threonine phosphatase activity	molecular_function	10
TRINITY_DN11373_c0_g1	UNIPROTKB|E1C2M2	25.8	7.9e-08	770435	DUSP8	GO:0035335	peptidyl-tyrosine dephosphorylation	biological_process	10
TRINITY_DN11376_c0_g1	ZFIN|ZDB-GENE-061013-607	37.8	8e-27	768155	leng9	GO:0046872	metal ion binding	molecular_function	6
TRINITY_DN11379_c0_g1	UNIPROTKB|Q89RS6	30.7	2.2e-58	1054327	blr2686	GO:0004497	monooxygenase activity	molecular_function	5
TRINITY_DN11379_c0_g1	UNIPROTKB|Q89RS6	30.7	2.2e-58	1054327	blr2686	GO:0044550	secondary metabolite biosynthetic process	biological_process	5
TRINITY_DN11379_c0_g2	UNIPROTKB|F1NL88	38.4	1e-14	-	RTN4IP1	GO:0008270	zinc ion binding	molecular_function	8
TRINITY_DN11379_c0_g2	UNIPROTKB|F1NL88	38.4	1e-14	-	RTN4IP1	GO:0016491	oxidoreductase activity	molecular_function	4
TRINITY_DN11379_c0_g2	UNIPROTKB|F1NL88	38.4	1e-14	-	RTN4IP1	GO:0055114	oxidation-reduction process	biological_process	4
TRINITY_DN1137_c0_g1	ZFIN|ZDB-GENE-050211-4	51.5	2.1e-33	-	ext1b	GO:0005783	endoplasmic reticulum	cellular_component	6
TRINITY_DN1137_c0_g1	ZFIN|ZDB-GENE-050211-4	51.5	2.1e-33	-	ext1b	GO:0006486	protein glycosylation	biological_process	9
TRINITY_DN1137_c0_g1	ZFIN|ZDB-GENE-050211-4	51.5	2.1e-33	-	ext1b	GO:0015012	heparan sulfate proteoglycan biosynthetic process	biological_process	10
TRINITY_DN1137_c0_g1	ZFIN|ZDB-GENE-050211-4	51.5	2.1e-33	-	ext1b	GO:0015020	glucuronosyltransferase activity	molecular_function	7
TRINITY_DN1137_c0_g1	ZFIN|ZDB-GENE-050211-4	51.5	2.1e-33	-	ext1b	GO:0016020	membrane	cellular_component	3
TRINITY_DN1137_c0_g1	ZFIN|ZDB-GENE-050211-4	51.5	2.1e-33	-	ext1b	GO:0016021	integral component of membrane	cellular_component	5
TRINITY_DN1137_c0_g1	ZFIN|ZDB-GENE-050211-4	51.5	2.1e-33	-	ext1b	GO:0016740	transferase activity	molecular_function	4
TRINITY_DN1137_c0_g1	ZFIN|ZDB-GENE-050211-4	51.5	2.1e-33	-	ext1b	GO:0016757	transferase activity, transferring glycosyl groups	molecular_function	5
TRINITY_DN1137_c0_g1	ZFIN|ZDB-GENE-050211-4	51.5	2.1e-33	-	ext1b	GO:0030176	integral component of endoplasmic reticulum membrane	cellular_component	7
TRINITY_DN1137_c0_g1	ZFIN|ZDB-GENE-050211-4	51.5	2.1e-33	-	ext1b	GO:0046872	metal ion binding	molecular_function	6
TRINITY_DN1137_c0_g1	ZFIN|ZDB-GENE-050211-4	51.5	2.1e-33	-	ext1b	GO:0050508	glucuronosyl-N-acetylglucosaminyl-proteoglycan 4-alpha-N-acetylglucosaminyltransferase activity	molecular_function	8
TRINITY_DN1137_c0_g1	ZFIN|ZDB-GENE-050211-4	51.5	2.1e-33	-	ext1b	GO:0050509	N-acetylglucosaminyl-proteoglycan 4-beta-glucuronosyltransferase activity	molecular_function	8
TRINITY_DN11385_c0_g1	UNIPROTKB|A7SHX1	48.5	1.1e-81	5508189	v1g190019	GO:0004197	cysteine-type endopeptidase activity	molecular_function	8
TRINITY_DN11385_c0_g1	UNIPROTKB|A7SHX1	48.5	1.1e-81	5508189	v1g190019	GO:0005615	extracellular space	cellular_component	4
TRINITY_DN11385_c0_g1	UNIPROTKB|A7SHX1	48.5	1.1e-81	5508189	v1g190019	GO:0005764	lysosome	cellular_component	8
TRINITY_DN11385_c0_g1	UNIPROTKB|A7SHX1	48.5	1.1e-81	5508189	v1g190019	GO:0051603	proteolysis involved in cellular protein catabolic process	biological_process	8
TRINITY_DN11391_c0_g1	UNIPROTKB|Q3SZK3	50.9	5.1e-65	404143	GHITM	GO:0005739	mitochondrion	cellular_component	6
TRINITY_DN11391_c0_g1	UNIPROTKB|Q3SZK3	50.9	5.1e-65	404143	GHITM	GO:0016021	integral component of membrane	cellular_component	5
TRINITY_DN11391_c0_g1	UNIPROTKB|Q3SZK3	50.9	5.1e-65	404143	GHITM	GO:0070062	extracellular exosome	cellular_component	7
TRINITY_DN11394_c0_g1	ZFIN|ZDB-GENE-110411-22	63.3	9.1e-11	798291	atp5f1e	GO:0000275	mitochondrial proton-transporting ATP synthase complex, catalytic core F(1)	cellular_component	7
TRINITY_DN11394_c0_g1	ZFIN|ZDB-GENE-110411-22	63.3	9.1e-11	798291	atp5f1e	GO:0005743	mitochondrial inner membrane	cellular_component	6
TRINITY_DN11394_c0_g1	ZFIN|ZDB-GENE-110411-22	63.3	9.1e-11	798291	atp5f1e	GO:0015986	ATP synthesis coupled proton transport	biological_process	13
TRINITY_DN11394_c0_g1	ZFIN|ZDB-GENE-110411-22	63.3	9.1e-11	798291	atp5f1e	GO:0016887	ATPase activity	molecular_function	9
TRINITY_DN11394_c0_g1	ZFIN|ZDB-GENE-110411-22	63.3	9.1e-11	798291	atp5f1e	GO:0046933	proton-transporting ATP synthase activity, rotational mechanism	molecular_function	10
TRINITY_DN11396_c0_g1	UNIPROTKB|F6XDJ1	73	1.7e-24	-	rps12	GO:0003735	structural constituent of ribosome	molecular_function	4
TRINITY_DN11396_c0_g1	UNIPROTKB|F6XDJ1	73	1.7e-24	-	rps12	GO:0022627	cytosolic small ribosomal subunit	cellular_component	8
TRINITY_DN11399_c0_g2	ZFIN|ZDB-GENE-990603-1	57.1	0	30707	cse1l	GO:0005049	nuclear export signal receptor activity	molecular_function	5
TRINITY_DN11399_c0_g2	ZFIN|ZDB-GENE-990603-1	57.1	0	30707	cse1l	GO:0005515	protein binding	molecular_function	4
TRINITY_DN11399_c0_g2	ZFIN|ZDB-GENE-990603-1	57.1	0	30707	cse1l	GO:0005634	nucleus	cellular_component	6
TRINITY_DN11399_c0_g2	ZFIN|ZDB-GENE-990603-1	57.1	0	30707	cse1l	GO:0005635	nuclear envelope	cellular_component	6
TRINITY_DN11399_c0_g2	ZFIN|ZDB-GENE-990603-1	57.1	0	30707	cse1l	GO:0005737	cytoplasm	cellular_component	5
TRINITY_DN11399_c0_g2	ZFIN|ZDB-GENE-990603-1	57.1	0	30707	cse1l	GO:0005829	cytosol	cellular_component	6
TRINITY_DN11399_c0_g2	ZFIN|ZDB-GENE-990603-1	57.1	0	30707	cse1l	GO:0005886	plasma membrane	cellular_component	4
TRINITY_DN11399_c0_g2	ZFIN|ZDB-GENE-990603-1	57.1	0	30707	cse1l	GO:0006606	protein import into nucleus	biological_process	11
TRINITY_DN11399_c0_g2	ZFIN|ZDB-GENE-990603-1	57.1	0	30707	cse1l	GO:0006886	intracellular protein transport	biological_process	10
TRINITY_DN11399_c0_g2	ZFIN|ZDB-GENE-990603-1	57.1	0	30707	cse1l	GO:0007589	body fluid secretion	biological_process	7
TRINITY_DN11399_c0_g2	ZFIN|ZDB-GENE-990603-1	57.1	0	30707	cse1l	GO:0008536	Ran GTPase binding	molecular_function	9
TRINITY_DN11399_c0_g2	ZFIN|ZDB-GENE-990603-1	57.1	0	30707	cse1l	GO:0009925	basal plasma membrane	cellular_component	5
TRINITY_DN11399_c0_g2	ZFIN|ZDB-GENE-990603-1	57.1	0	30707	cse1l	GO:0015031	protein transport	biological_process	9
TRINITY_DN11399_c0_g2	ZFIN|ZDB-GENE-990603-1	57.1	0	30707	cse1l	GO:0016020	membrane	cellular_component	3
TRINITY_DN11399_c0_g2	ZFIN|ZDB-GENE-990603-1	57.1	0	30707	cse1l	GO:0016324	apical plasma membrane	cellular_component	5
TRINITY_DN11399_c0_g2	ZFIN|ZDB-GENE-990603-1	57.1	0	30707	cse1l	GO:0016328	lateral plasma membrane	cellular_component	5
TRINITY_DN11404_c0_g1	UNIPROTKB|A7SYK3	60.7	7.3e-32	5502098	v1g137996	GO:0005739	mitochondrion	cellular_component	6
TRINITY_DN11424_c0_g1	UNIPROTKB|E1BN25	32.9	2e-58	-	BAZ1A	GO:0006261	DNA-dependent DNA replication	biological_process	9
TRINITY_DN11424_c0_g1	UNIPROTKB|E1BN25	32.9	2e-58	-	BAZ1A	GO:0008270	zinc ion binding	molecular_function	8
TRINITY_DN11424_c0_g1	UNIPROTKB|E1BN25	32.9	2e-58	-	BAZ1A	GO:0008623	CHRAC	cellular_component	9
TRINITY_DN11429_c0_g1	UNIPROTKB|F1PLV5	50.7	5.6e-16	-	PDE10A	GO:0004118	cGMP-stimulated cyclic-nucleotide phosphodiesterase activity	molecular_function	10
TRINITY_DN11429_c0_g1	UNIPROTKB|F1PLV5	50.7	5.6e-16	-	PDE10A	GO:0007165	signal transduction	biological_process	4
TRINITY_DN11429_c0_g1	UNIPROTKB|F1PLV5	50.7	5.6e-16	-	PDE10A	GO:0010738	regulation of protein kinase A signaling	biological_process	9
TRINITY_DN11429_c0_g1	UNIPROTKB|F1PLV5	50.7	5.6e-16	-	PDE10A	GO:0030552	cAMP binding	molecular_function	7
TRINITY_DN11429_c0_g1	UNIPROTKB|F1PLV5	50.7	5.6e-16	-	PDE10A	GO:0043949	regulation of cAMP-mediated signaling	biological_process	9
TRINITY_DN11429_c0_g1	UNIPROTKB|F1PLV5	50.7	5.6e-16	-	PDE10A	GO:0046872	metal ion binding	molecular_function	6
TRINITY_DN11432_c1_g1	MGI|MGI:1924814	44.1	2.4e-07	109284	R3hdm4	GO:0003674	molecular_function	molecular_function	2
TRINITY_DN11432_c1_g1	MGI|MGI:1924814	44.1	2.4e-07	109284	R3hdm4	GO:0003676	nucleic acid binding	molecular_function	5
TRINITY_DN11432_c1_g1	MGI|MGI:1924814	44.1	2.4e-07	109284	R3hdm4	GO:0005575	cellular_component	cellular_component	2
TRINITY_DN11432_c1_g1	MGI|MGI:1924814	44.1	2.4e-07	109284	R3hdm4	GO:0005634	nucleus	cellular_component	6
TRINITY_DN11432_c1_g1	MGI|MGI:1924814	44.1	2.4e-07	109284	R3hdm4	GO:0008150	biological_process	biological_process	2
TRINITY_DN11442_c0_g1	ZFIN|ZDB-GENE-991008-18	41.8	7.7e-49	30232	nipsnap2	GO:0005737	cytoplasm	cellular_component	5
TRINITY_DN11442_c0_g1	ZFIN|ZDB-GENE-991008-18	41.8	7.7e-49	30232	nipsnap2	GO:0005739	mitochondrion	cellular_component	6
TRINITY_DN11461_c0_g1	UNIPROTKB|A7RMB0	50	3.1e-16	5519750	v1g239337	GO:0001056	RNA polymerase III activity	molecular_function	10
TRINITY_DN11461_c0_g1	UNIPROTKB|A7RMB0	50	3.1e-16	5519750	v1g239337	GO:0005666	DNA-directed RNA polymerase III complex	cellular_component	8
TRINITY_DN11461_c0_g1	UNIPROTKB|A7RMB0	50	3.1e-16	5519750	v1g239337	GO:0006384	transcription initiation from RNA polymerase III promoter	biological_process	9
TRINITY_DN11468_c0_g2	ZFIN|ZDB-GENE-050417-80	34.6	6.8e-55	550273	ascc1	GO:0001966	thigmotaxis	biological_process	5
TRINITY_DN11468_c0_g2	ZFIN|ZDB-GENE-050417-80	34.6	6.8e-55	550273	ascc1	GO:0003676	nucleic acid binding	molecular_function	5
TRINITY_DN11468_c0_g2	ZFIN|ZDB-GENE-050417-80	34.6	6.8e-55	550273	ascc1	GO:0003723	RNA binding	molecular_function	6
TRINITY_DN11468_c0_g2	ZFIN|ZDB-GENE-050417-80	34.6	6.8e-55	550273	ascc1	GO:0007409	axonogenesis	biological_process	9
TRINITY_DN11468_c0_g2	ZFIN|ZDB-GENE-050417-80	34.6	6.8e-55	550273	ascc1	GO:0007528	neuromuscular junction development	biological_process	6
TRINITY_DN11468_c0_g2	ZFIN|ZDB-GENE-050417-80	34.6	6.8e-55	550273	ascc1	GO:0061055	myotome development	biological_process	5
TRINITY_DN11471_c0_g1	UNIPROTKB|F1P4C7	22.4	6.5e-10	-	TRIM24	GO:0002039	p53 binding	molecular_function	5
TRINITY_DN11471_c0_g1	UNIPROTKB|F1P4C7	22.4	6.5e-10	-	TRIM24	GO:0003682	chromatin binding	molecular_function	4
TRINITY_DN11471_c0_g1	UNIPROTKB|F1P4C7	22.4	6.5e-10	-	TRIM24	GO:0003713	transcription coactivator activity	molecular_function	5
TRINITY_DN11471_c0_g1	UNIPROTKB|F1P4C7	22.4	6.5e-10	-	TRIM24	GO:0004672	protein kinase activity	molecular_function	7
TRINITY_DN11471_c0_g1	UNIPROTKB|F1P4C7	22.4	6.5e-10	-	TRIM24	GO:0005719	nuclear euchromatin	cellular_component	8
TRINITY_DN11471_c0_g1	UNIPROTKB|F1P4C7	22.4	6.5e-10	-	TRIM24	GO:0005726	perichromatin fibrils	cellular_component	7
TRINITY_DN11471_c0_g1	UNIPROTKB|F1P4C7	22.4	6.5e-10	-	TRIM24	GO:0005737	cytoplasm	cellular_component	5
TRINITY_DN11471_c0_g1	UNIPROTKB|F1P4C7	22.4	6.5e-10	-	TRIM24	GO:0008270	zinc ion binding	molecular_function	8
TRINITY_DN11471_c0_g1	UNIPROTKB|F1P4C7	22.4	6.5e-10	-	TRIM24	GO:0008285	negative regulation of cell proliferation	biological_process	7
TRINITY_DN11471_c0_g1	UNIPROTKB|F1P4C7	22.4	6.5e-10	-	TRIM24	GO:0016567	protein ubiquitination	biological_process	11
TRINITY_DN11471_c0_g1	UNIPROTKB|F1P4C7	22.4	6.5e-10	-	TRIM24	GO:0016922	ligand-dependent nuclear receptor binding	molecular_function	8
TRINITY_DN11471_c0_g1	UNIPROTKB|F1P4C7	22.4	6.5e-10	-	TRIM24	GO:0030163	protein catabolic process	biological_process	7
TRINITY_DN11471_c0_g1	UNIPROTKB|F1P4C7	22.4	6.5e-10	-	TRIM24	GO:0031647	regulation of protein stability	biological_process	5
TRINITY_DN11471_c0_g1	UNIPROTKB|F1P4C7	22.4	6.5e-10	-	TRIM24	GO:0034056	estrogen response element binding	molecular_function	11
TRINITY_DN11471_c0_g1	UNIPROTKB|F1P4C7	22.4	6.5e-10	-	TRIM24	GO:0042981	regulation of apoptotic process	biological_process	8
TRINITY_DN11471_c0_g1	UNIPROTKB|F1P4C7	22.4	6.5e-10	-	TRIM24	GO:0043565	sequence-specific DNA binding	molecular_function	7
TRINITY_DN11471_c0_g1	UNIPROTKB|F1P4C7	22.4	6.5e-10	-	TRIM24	GO:0045892	negative regulation of transcription, DNA-templated	biological_process	9
TRINITY_DN11471_c0_g1	UNIPROTKB|F1P4C7	22.4	6.5e-10	-	TRIM24	GO:0045893	positive regulation of transcription, DNA-templated	biological_process	9
TRINITY_DN11471_c0_g1	UNIPROTKB|F1P4C7	22.4	6.5e-10	-	TRIM24	GO:0046777	protein autophosphorylation	biological_process	10
TRINITY_DN11471_c0_g1	UNIPROTKB|F1P4C7	22.4	6.5e-10	-	TRIM24	GO:0055074	calcium ion homeostasis	biological_process	10
TRINITY_DN11471_c0_g1	UNIPROTKB|F1P4C7	22.4	6.5e-10	-	TRIM24	GO:0061630	ubiquitin protein ligase activity	molecular_function	7
TRINITY_DN11471_c0_g1	UNIPROTKB|F1P4C7	22.4	6.5e-10	-	TRIM24	GO:0070562	regulation of vitamin D receptor signaling pathway	biological_process	8
TRINITY_DN11471_c0_g1	UNIPROTKB|F1P4C7	22.4	6.5e-10	-	TRIM24	GO:0070577	lysine-acetylated histone binding	molecular_function	6
TRINITY_DN11471_c0_g1	UNIPROTKB|F1P4C7	22.4	6.5e-10	-	TRIM24	GO:0071391	cellular response to estrogen stimulus	biological_process	5
TRINITY_DN11471_c0_g1	UNIPROTKB|F1P4C7	22.4	6.5e-10	-	TRIM24	GO:1901796	regulation of signal transduction by p53 class mediator	biological_process	9
TRINITY_DN11484_c0_g1	RGD|1306774	34.4	2.1e-42	360874	Tada1	GO:0000124	SAGA complex	cellular_component	8
TRINITY_DN11484_c0_g1	RGD|1306774	34.4	2.1e-42	360874	Tada1	GO:0003713	transcription coactivator activity	molecular_function	5
TRINITY_DN11484_c0_g1	RGD|1306774	34.4	2.1e-42	360874	Tada1	GO:0004402	histone acetyltransferase activity	molecular_function	11
TRINITY_DN11484_c0_g1	RGD|1306774	34.4	2.1e-42	360874	Tada1	GO:0005515	protein binding	molecular_function	4
TRINITY_DN11484_c0_g1	RGD|1306774	34.4	2.1e-42	360874	Tada1	GO:0005575	cellular_component	cellular_component	2
TRINITY_DN11484_c0_g1	RGD|1306774	34.4	2.1e-42	360874	Tada1	GO:0005634	nucleus	cellular_component	6
TRINITY_DN11484_c0_g1	RGD|1306774	34.4	2.1e-42	360874	Tada1	GO:0005654	nucleoplasm	cellular_component	6
TRINITY_DN11484_c0_g1	RGD|1306774	34.4	2.1e-42	360874	Tada1	GO:0005829	cytosol	cellular_component	6
TRINITY_DN11484_c0_g1	RGD|1306774	34.4	2.1e-42	360874	Tada1	GO:0005925	focal adhesion	cellular_component	7
TRINITY_DN11484_c0_g1	RGD|1306774	34.4	2.1e-42	360874	Tada1	GO:0006351	transcription, DNA-templated	biological_process	8
TRINITY_DN11484_c0_g1	RGD|1306774	34.4	2.1e-42	360874	Tada1	GO:0006357	regulation of transcription by RNA polymerase II	biological_process	9
TRINITY_DN11484_c0_g1	RGD|1306774	34.4	2.1e-42	360874	Tada1	GO:0008150	biological_process	biological_process	2
TRINITY_DN11484_c0_g1	RGD|1306774	34.4	2.1e-42	360874	Tada1	GO:0030914	STAGA complex	cellular_component	8
TRINITY_DN11484_c0_g1	RGD|1306774	34.4	2.1e-42	360874	Tada1	GO:0043966	histone H3 acetylation	biological_process	11
TRINITY_DN11484_c0_g1	RGD|1306774	34.4	2.1e-42	360874	Tada1	GO:1903506	regulation of nucleic acid-templated transcription	biological_process	9
TRINITY_DN11487_c0_g3	UNIPROTKB|A7RY02	39.3	4.6e-46	5515504	v1g203816	GO:0004826	phenylalanine-tRNA ligase activity	molecular_function	7
TRINITY_DN11487_c0_g3	UNIPROTKB|A7RY02	39.3	4.6e-46	5515504	v1g203816	GO:0006432	phenylalanyl-tRNA aminoacylation	biological_process	13
TRINITY_DN11487_c0_g3	UNIPROTKB|A7RY02	39.3	4.6e-46	5515504	v1g203816	GO:0009328	phenylalanine-tRNA ligase complex	cellular_component	6
TRINITY_DN11491_c0_g1	UNIPROTKB|A7RTD7	48	1.2e-84	5517239	v1g92762	GO:0005737	cytoplasm	cellular_component	5
TRINITY_DN11491_c0_g1	UNIPROTKB|A7RTD7	48	1.2e-84	5517239	v1g92762	GO:0030170	pyridoxal phosphate binding	molecular_function	6
TRINITY_DN11505_c0_g1	UNIPROTKB|P00395	94.3	1.7e-30	4512	MT-CO1	GO:0004129	cytochrome-c oxidase activity	molecular_function	6
TRINITY_DN11505_c0_g1	UNIPROTKB|P00395	94.3	1.7e-30	4512	MT-CO1	GO:0005506	iron ion binding	molecular_function	8
TRINITY_DN11505_c0_g1	UNIPROTKB|P00395	94.3	1.7e-30	4512	MT-CO1	GO:0005515	protein binding	molecular_function	4
TRINITY_DN11505_c0_g1	UNIPROTKB|P00395	94.3	1.7e-30	4512	MT-CO1	GO:0005743	mitochondrial inner membrane	cellular_component	6
TRINITY_DN11505_c0_g1	UNIPROTKB|P00395	94.3	1.7e-30	4512	MT-CO1	GO:0005751	mitochondrial respiratory chain complex IV	cellular_component	6
TRINITY_DN11505_c0_g1	UNIPROTKB|P00395	94.3	1.7e-30	4512	MT-CO1	GO:0006123	mitochondrial electron transport, cytochrome c to oxygen	biological_process	10
TRINITY_DN11505_c0_g1	UNIPROTKB|P00395	94.3	1.7e-30	4512	MT-CO1	GO:0006979	response to oxidative stress	biological_process	5
TRINITY_DN11505_c0_g1	UNIPROTKB|P00395	94.3	1.7e-30	4512	MT-CO1	GO:0007568	aging	biological_process	4
TRINITY_DN11505_c0_g1	UNIPROTKB|P00395	94.3	1.7e-30	4512	MT-CO1	GO:0009060	aerobic respiration	biological_process	8
TRINITY_DN11505_c0_g1	UNIPROTKB|P00395	94.3	1.7e-30	4512	MT-CO1	GO:0016021	integral component of membrane	cellular_component	5
TRINITY_DN11505_c0_g1	UNIPROTKB|P00395	94.3	1.7e-30	4512	MT-CO1	GO:0020037	heme binding	molecular_function	6
TRINITY_DN11505_c0_g1	UNIPROTKB|P00395	94.3	1.7e-30	4512	MT-CO1	GO:0021549	cerebellum development	biological_process	5
TRINITY_DN11505_c0_g1	UNIPROTKB|P00395	94.3	1.7e-30	4512	MT-CO1	GO:0045277	respiratory chain complex IV	cellular_component	5
TRINITY_DN11505_c0_g1	UNIPROTKB|P00395	94.3	1.7e-30	4512	MT-CO1	GO:0046688	response to copper ion	biological_process	7
TRINITY_DN11505_c0_g1	UNIPROTKB|P00395	94.3	1.7e-30	4512	MT-CO1	GO:0051602	response to electrical stimulus	biological_process	5
TRINITY_DN11505_c0_g1	UNIPROTKB|P00395	94.3	1.7e-30	4512	MT-CO1	GO:1902600	proton transmembrane transport	biological_process	9
TRINITY_DN11506_c0_g1	FB|FBgn0021765	64.7	5.4e-86	32789	scu	GO:0004303	estradiol 17-beta-dehydrogenase activity	molecular_function	7
TRINITY_DN11506_c0_g1	FB|FBgn0021765	64.7	5.4e-86	32789	scu	GO:0004526	ribonuclease P activity	molecular_function	9
TRINITY_DN11506_c0_g1	FB|FBgn0021765	64.7	5.4e-86	32789	scu	GO:0005739	mitochondrion	cellular_component	6
TRINITY_DN11506_c0_g1	FB|FBgn0021765	64.7	5.4e-86	32789	scu	GO:0005829	cytosol	cellular_component	6
TRINITY_DN11506_c0_g1	FB|FBgn0021765	64.7	5.4e-86	32789	scu	GO:0006631	fatty acid metabolic process	biological_process	9
TRINITY_DN11506_c0_g1	FB|FBgn0021765	64.7	5.4e-86	32789	scu	GO:0006637	acyl-CoA metabolic process	biological_process	7
TRINITY_DN11506_c0_g1	FB|FBgn0021765	64.7	5.4e-86	32789	scu	GO:0008202	steroid metabolic process	biological_process	6
TRINITY_DN11506_c0_g1	FB|FBgn0021765	64.7	5.4e-86	32789	scu	GO:0008205	ecdysone metabolic process	biological_process	8
TRINITY_DN11506_c0_g1	FB|FBgn0021765	64.7	5.4e-86	32789	scu	GO:0008209	androgen metabolic process	biological_process	7
TRINITY_DN11506_c0_g1	FB|FBgn0021765	64.7	5.4e-86	32789	scu	GO:0008210	estrogen metabolic process	biological_process	7
TRINITY_DN11506_c0_g1	FB|FBgn0021765	64.7	5.4e-86	32789	scu	GO:0016229	steroid dehydrogenase activity	molecular_function	5
TRINITY_DN11506_c0_g1	FB|FBgn0021765	64.7	5.4e-86	32789	scu	GO:0018454	acetoacetyl-CoA reductase activity	molecular_function	7
TRINITY_DN11506_c0_g1	FB|FBgn0021765	64.7	5.4e-86	32789	scu	GO:0030678	mitochondrial ribonuclease P complex	cellular_component	8
TRINITY_DN11506_c0_g1	FB|FBgn0021765	64.7	5.4e-86	32789	scu	GO:0047022	7-beta-hydroxysteroid dehydrogenase (NADP+) activity	molecular_function	7
TRINITY_DN11506_c0_g1	FB|FBgn0021765	64.7	5.4e-86	32789	scu	GO:0047035	testosterone dehydrogenase (NAD+) activity	molecular_function	7
TRINITY_DN11506_c0_g1	FB|FBgn0021765	64.7	5.4e-86	32789	scu	GO:0090646	mitochondrial tRNA processing	biological_process	11
TRINITY_DN11521_c0_g1	UNIPROTKB|E2RDZ6	50.8	4.3e-97	478726	SIRT5	GO:0005634	nucleus	cellular_component	6
TRINITY_DN11521_c0_g1	UNIPROTKB|E2RDZ6	50.8	4.3e-97	478726	SIRT5	GO:0005739	mitochondrion	cellular_component	6
TRINITY_DN11521_c0_g1	UNIPROTKB|E2RDZ6	50.8	4.3e-97	478726	SIRT5	GO:0005743	mitochondrial inner membrane	cellular_component	6
TRINITY_DN11521_c0_g1	UNIPROTKB|E2RDZ6	50.8	4.3e-97	478726	SIRT5	GO:0005758	mitochondrial intermembrane space	cellular_component	6
TRINITY_DN11521_c0_g1	UNIPROTKB|E2RDZ6	50.8	4.3e-97	478726	SIRT5	GO:0005759	mitochondrial matrix	cellular_component	7
TRINITY_DN11521_c0_g1	UNIPROTKB|E2RDZ6	50.8	4.3e-97	478726	SIRT5	GO:0005829	cytosol	cellular_component	6
TRINITY_DN11521_c0_g1	UNIPROTKB|E2RDZ6	50.8	4.3e-97	478726	SIRT5	GO:0006476	protein deacetylation	biological_process	10
TRINITY_DN11521_c0_g1	UNIPROTKB|E2RDZ6	50.8	4.3e-97	478726	SIRT5	GO:0008270	zinc ion binding	molecular_function	8
TRINITY_DN11521_c0_g1	UNIPROTKB|E2RDZ6	50.8	4.3e-97	478726	SIRT5	GO:0010566	regulation of ketone biosynthetic process	biological_process	8
TRINITY_DN11521_c0_g1	UNIPROTKB|E2RDZ6	50.8	4.3e-97	478726	SIRT5	GO:0034979	NAD-dependent protein deacetylase activity	molecular_function	7
TRINITY_DN11521_c0_g1	UNIPROTKB|E2RDZ6	50.8	4.3e-97	478726	SIRT5	GO:0036046	protein demalonylation	biological_process	10
TRINITY_DN11521_c0_g1	UNIPROTKB|E2RDZ6	50.8	4.3e-97	478726	SIRT5	GO:0036047	peptidyl-lysine demalonylation	biological_process	11
TRINITY_DN11521_c0_g1	UNIPROTKB|E2RDZ6	50.8	4.3e-97	478726	SIRT5	GO:0036048	protein desuccinylation	biological_process	10
TRINITY_DN11521_c0_g1	UNIPROTKB|E2RDZ6	50.8	4.3e-97	478726	SIRT5	GO:0036049	peptidyl-lysine desuccinylation	biological_process	11
TRINITY_DN11521_c0_g1	UNIPROTKB|E2RDZ6	50.8	4.3e-97	478726	SIRT5	GO:0036054	protein-malonyllysine demalonylase activity	molecular_function	7
TRINITY_DN11521_c0_g1	UNIPROTKB|E2RDZ6	50.8	4.3e-97	478726	SIRT5	GO:0036055	protein-succinyllysine desuccinylase activity	molecular_function	7
TRINITY_DN11521_c0_g1	UNIPROTKB|E2RDZ6	50.8	4.3e-97	478726	SIRT5	GO:0061697	protein-glutaryllysine deglutarylase activity	molecular_function	7
TRINITY_DN11521_c0_g1	UNIPROTKB|E2RDZ6	50.8	4.3e-97	478726	SIRT5	GO:0061699	peptidyl-lysine deglutarylation	biological_process	11
TRINITY_DN11521_c0_g1	UNIPROTKB|E2RDZ6	50.8	4.3e-97	478726	SIRT5	GO:0070403	NAD+ binding	molecular_function	6
TRINITY_DN11521_c0_g1	UNIPROTKB|E2RDZ6	50.8	4.3e-97	478726	SIRT5	GO:2000378	negative regulation of reactive oxygen species metabolic process	biological_process	8
TRINITY_DN11551_c0_g1	UNIPROTKB|P52758	64.1	5.4e-42	10247	HRSP12	GO:0001822	kidney development	biological_process	6
TRINITY_DN11551_c0_g1	UNIPROTKB|P52758	64.1	5.4e-42	10247	HRSP12	GO:0005634	nucleus	cellular_component	6
TRINITY_DN11551_c0_g1	UNIPROTKB|P52758	64.1	5.4e-42	10247	HRSP12	GO:0005737	cytoplasm	cellular_component	5
TRINITY_DN11551_c0_g1	UNIPROTKB|P52758	64.1	5.4e-42	10247	HRSP12	GO:0005739	mitochondrion	cellular_component	6
TRINITY_DN11551_c0_g1	UNIPROTKB|P52758	64.1	5.4e-42	10247	HRSP12	GO:0005777	peroxisome	cellular_component	7
TRINITY_DN11551_c0_g1	UNIPROTKB|P52758	64.1	5.4e-42	10247	HRSP12	GO:0005829	cytosol	cellular_component	6
TRINITY_DN11551_c0_g1	UNIPROTKB|P52758	64.1	5.4e-42	10247	HRSP12	GO:0006449	regulation of translational termination	biological_process	10
TRINITY_DN11551_c0_g1	UNIPROTKB|P52758	64.1	5.4e-42	10247	HRSP12	GO:0007420	brain development	biological_process	6
TRINITY_DN11551_c0_g1	UNIPROTKB|P52758	64.1	5.4e-42	10247	HRSP12	GO:0016892	endoribonuclease activity, producing 3'-phosphomonoesters	molecular_function	9
TRINITY_DN11551_c0_g1	UNIPROTKB|P52758	64.1	5.4e-42	10247	HRSP12	GO:0017148	negative regulation of translation	biological_process	10
TRINITY_DN11551_c0_g1	UNIPROTKB|P52758	64.1	5.4e-42	10247	HRSP12	GO:0030324	lung development	biological_process	6
TRINITY_DN11551_c0_g1	UNIPROTKB|P52758	64.1	5.4e-42	10247	HRSP12	GO:0033993	response to lipid	biological_process	6
TRINITY_DN11551_c0_g1	UNIPROTKB|P52758	64.1	5.4e-42	10247	HRSP12	GO:0036041	long-chain fatty acid binding	molecular_function	6
TRINITY_DN11551_c0_g1	UNIPROTKB|P52758	64.1	5.4e-42	10247	HRSP12	GO:0042803	protein homodimerization activity	molecular_function	6
TRINITY_DN11551_c0_g1	UNIPROTKB|P52758	64.1	5.4e-42	10247	HRSP12	GO:0046914	transition metal ion binding	molecular_function	7
TRINITY_DN11551_c0_g1	UNIPROTKB|P52758	64.1	5.4e-42	10247	HRSP12	GO:0050680	negative regulation of epithelial cell proliferation	biological_process	8
TRINITY_DN11551_c0_g1	UNIPROTKB|P52758	64.1	5.4e-42	10247	HRSP12	GO:0070062	extracellular exosome	cellular_component	7
TRINITY_DN11551_c0_g1	UNIPROTKB|P52758	64.1	5.4e-42	10247	HRSP12	GO:0070314	G1 to G0 transition	biological_process	5
TRINITY_DN11551_c0_g1	UNIPROTKB|P52758	64.1	5.4e-42	10247	HRSP12	GO:0090502	RNA phosphodiester bond hydrolysis, endonucleolytic	biological_process	10
TRINITY_DN11551_c0_g1	UNIPROTKB|P52758	64.1	5.4e-42	10247	HRSP12	GO:1902074	response to salt	biological_process	5
TRINITY_DN11554_c0_g1	UNIPROTKB|E1C3Q4	45.1	6.7e-34	-	CSTF1	GO:0006397	mRNA processing	biological_process	10
TRINITY_DN11555_c0_g3	UNIPROTKB|P03915	97.2	3.5e-29	4540	MT-ND5	GO:0001666	response to hypoxia	biological_process	5
TRINITY_DN11555_c0_g3	UNIPROTKB|P03915	97.2	3.5e-29	4540	MT-ND5	GO:0005743	mitochondrial inner membrane	cellular_component	6
TRINITY_DN11555_c0_g3	UNIPROTKB|P03915	97.2	3.5e-29	4540	MT-ND5	GO:0005747	mitochondrial respiratory chain complex I	cellular_component	7
TRINITY_DN11555_c0_g3	UNIPROTKB|P03915	97.2	3.5e-29	4540	MT-ND5	GO:0006120	mitochondrial electron transport, NADH to ubiquinone	biological_process	8
TRINITY_DN11555_c0_g3	UNIPROTKB|P03915	97.2	3.5e-29	4540	MT-ND5	GO:0008137	NADH dehydrogenase (ubiquinone) activity	molecular_function	8
TRINITY_DN11555_c0_g3	UNIPROTKB|P03915	97.2	3.5e-29	4540	MT-ND5	GO:0010243	response to organonitrogen compound	biological_process	6
TRINITY_DN11555_c0_g3	UNIPROTKB|P03915	97.2	3.5e-29	4540	MT-ND5	GO:0016021	integral component of membrane	cellular_component	5
TRINITY_DN11555_c0_g3	UNIPROTKB|P03915	97.2	3.5e-29	4540	MT-ND5	GO:0032981	mitochondrial respiratory chain complex I assembly	biological_process	9
TRINITY_DN11555_c0_g3	UNIPROTKB|P03915	97.2	3.5e-29	4540	MT-ND5	GO:0042542	response to hydrogen peroxide	biological_process	7
TRINITY_DN11555_c0_g3	UNIPROTKB|P03915	97.2	3.5e-29	4540	MT-ND5	GO:0043005	neuron projection	cellular_component	5
TRINITY_DN11555_c0_g5	UNIPROTKB|P03923	98	1.4e-72	4541	MT-ND6	GO:0005739	mitochondrion	cellular_component	6
TRINITY_DN11555_c0_g5	UNIPROTKB|P03923	98	1.4e-72	4541	MT-ND6	GO:0005743	mitochondrial inner membrane	cellular_component	6
TRINITY_DN11555_c0_g5	UNIPROTKB|P03923	98	1.4e-72	4541	MT-ND6	GO:0006120	mitochondrial electron transport, NADH to ubiquinone	biological_process	8
TRINITY_DN11555_c0_g5	UNIPROTKB|P03923	98	1.4e-72	4541	MT-ND6	GO:0008137	NADH dehydrogenase (ubiquinone) activity	molecular_function	8
TRINITY_DN11555_c0_g5	UNIPROTKB|P03923	98	1.4e-72	4541	MT-ND6	GO:0016021	integral component of membrane	cellular_component	5
TRINITY_DN11555_c0_g5	UNIPROTKB|P03923	98	1.4e-72	4541	MT-ND6	GO:0032981	mitochondrial respiratory chain complex I assembly	biological_process	9
TRINITY_DN11555_c0_g5	UNIPROTKB|P03923	98	1.4e-72	4541	MT-ND6	GO:0035094	response to nicotine	biological_process	6
TRINITY_DN11555_c0_g5	UNIPROTKB|P03923	98	1.4e-72	4541	MT-ND6	GO:0042220	response to cocaine	biological_process	6
TRINITY_DN11555_c0_g5	UNIPROTKB|P03923	98	1.4e-72	4541	MT-ND6	GO:0042542	response to hydrogen peroxide	biological_process	7
TRINITY_DN11555_c0_g5	UNIPROTKB|P03923	98	1.4e-72	4541	MT-ND6	GO:0070469	respiratory chain	cellular_component	4
TRINITY_DN11555_c0_g6	MGI|MGI:102501	92.7	4.7e-188	17711	mt-Cytb	GO:0005739	mitochondrion	cellular_component	6
TRINITY_DN11555_c0_g6	MGI|MGI:102501	92.7	4.7e-188	17711	mt-Cytb	GO:0005743	mitochondrial inner membrane	cellular_component	6
TRINITY_DN11555_c0_g6	MGI|MGI:102501	92.7	4.7e-188	17711	mt-Cytb	GO:0006122	mitochondrial electron transport, ubiquinol to cytochrome c	biological_process	8
TRINITY_DN11555_c0_g6	MGI|MGI:102501	92.7	4.7e-188	17711	mt-Cytb	GO:0008121	ubiquinol-cytochrome-c reductase activity	molecular_function	6
TRINITY_DN11555_c0_g6	MGI|MGI:102501	92.7	4.7e-188	17711	mt-Cytb	GO:0009055	electron transfer activity	molecular_function	5
TRINITY_DN11555_c0_g6	MGI|MGI:102501	92.7	4.7e-188	17711	mt-Cytb	GO:0016020	membrane	cellular_component	3
TRINITY_DN11555_c0_g6	MGI|MGI:102501	92.7	4.7e-188	17711	mt-Cytb	GO:0016021	integral component of membrane	cellular_component	5
TRINITY_DN11555_c0_g6	MGI|MGI:102501	92.7	4.7e-188	17711	mt-Cytb	GO:0016491	oxidoreductase activity	molecular_function	4
TRINITY_DN11555_c0_g6	MGI|MGI:102501	92.7	4.7e-188	17711	mt-Cytb	GO:0022904	respiratory electron transport chain	biological_process	7
TRINITY_DN11555_c0_g6	MGI|MGI:102501	92.7	4.7e-188	17711	mt-Cytb	GO:0031305	integral component of mitochondrial inner membrane	cellular_component	8
TRINITY_DN11555_c0_g6	MGI|MGI:102501	92.7	4.7e-188	17711	mt-Cytb	GO:0033762	response to glucagon	biological_process	7
TRINITY_DN11555_c0_g6	MGI|MGI:102501	92.7	4.7e-188	17711	mt-Cytb	GO:0042538	hyperosmotic salinity response	biological_process	7
TRINITY_DN11555_c0_g6	MGI|MGI:102501	92.7	4.7e-188	17711	mt-Cytb	GO:0045275	respiratory chain complex III	cellular_component	5
TRINITY_DN11555_c0_g6	MGI|MGI:102501	92.7	4.7e-188	17711	mt-Cytb	GO:0046686	response to cadmium ion	biological_process	7
TRINITY_DN11555_c0_g6	MGI|MGI:102501	92.7	4.7e-188	17711	mt-Cytb	GO:0046689	response to mercury ion	biological_process	7
TRINITY_DN11555_c0_g6	MGI|MGI:102501	92.7	4.7e-188	17711	mt-Cytb	GO:0046872	metal ion binding	molecular_function	6
TRINITY_DN11555_c0_g6	MGI|MGI:102501	92.7	4.7e-188	17711	mt-Cytb	GO:0051592	response to calcium ion	biological_process	7
TRINITY_DN11555_c0_g6	MGI|MGI:102501	92.7	4.7e-188	17711	mt-Cytb	GO:0055114	oxidation-reduction process	biological_process	4
TRINITY_DN11555_c0_g6	MGI|MGI:102501	92.7	4.7e-188	17711	mt-Cytb	GO:0070469	respiratory chain	cellular_component	4
TRINITY_DN11561_c0_g2	ZFIN|ZDB-GENE-060601-2	48.7	2.7e-16	-	tbx5b	GO:0001947	heart looping	biological_process	7
TRINITY_DN11561_c0_g2	ZFIN|ZDB-GENE-060601-2	48.7	2.7e-16	-	tbx5b	GO:0003007	heart morphogenesis	biological_process	6
TRINITY_DN11561_c0_g2	ZFIN|ZDB-GENE-060601-2	48.7	2.7e-16	-	tbx5b	GO:0003146	heart jogging	biological_process	7
TRINITY_DN11561_c0_g2	ZFIN|ZDB-GENE-060601-2	48.7	2.7e-16	-	tbx5b	GO:0003677	DNA binding	molecular_function	6
TRINITY_DN11561_c0_g2	ZFIN|ZDB-GENE-060601-2	48.7	2.7e-16	-	tbx5b	GO:0003700	DNA binding transcription factor activity	molecular_function	4
TRINITY_DN11561_c0_g2	ZFIN|ZDB-GENE-060601-2	48.7	2.7e-16	-	tbx5b	GO:0005634	nucleus	cellular_component	6
TRINITY_DN11561_c0_g2	ZFIN|ZDB-GENE-060601-2	48.7	2.7e-16	-	tbx5b	GO:0006351	transcription, DNA-templated	biological_process	8
TRINITY_DN11561_c0_g2	ZFIN|ZDB-GENE-060601-2	48.7	2.7e-16	-	tbx5b	GO:0006355	regulation of transcription, DNA-templated	biological_process	8
TRINITY_DN11561_c0_g2	ZFIN|ZDB-GENE-060601-2	48.7	2.7e-16	-	tbx5b	GO:0007507	heart development	biological_process	6
TRINITY_DN11561_c0_g2	ZFIN|ZDB-GENE-060601-2	48.7	2.7e-16	-	tbx5b	GO:0021554	optic nerve development	biological_process	7
TRINITY_DN11561_c0_g2	ZFIN|ZDB-GENE-060601-2	48.7	2.7e-16	-	tbx5b	GO:0033339	pectoral fin development	biological_process	7
TRINITY_DN11561_c0_g2	ZFIN|ZDB-GENE-060601-2	48.7	2.7e-16	-	tbx5b	GO:0060042	retina morphogenesis in camera-type eye	biological_process	5
TRINITY_DN11583_c0_g1	UNIPROTKB|H2RKA8	69.2	9.7e-46	101071441	polr2i	GO:0001193	maintenance of transcriptional fidelity during DNA-templated transcription elongation from RNA polymerase II promoter	biological_process	9
TRINITY_DN11583_c0_g1	UNIPROTKB|H2RKA8	69.2	9.7e-46	101071441	polr2i	GO:0003899	DNA-directed 5'-3' RNA polymerase activity	molecular_function	9
TRINITY_DN11583_c0_g1	UNIPROTKB|H2RKA8	69.2	9.7e-46	101071441	polr2i	GO:0005665	DNA-directed RNA polymerase II, core complex	cellular_component	7
TRINITY_DN11583_c0_g1	UNIPROTKB|H2RKA8	69.2	9.7e-46	101071441	polr2i	GO:0006283	transcription-coupled nucleotide-excision repair	biological_process	10
TRINITY_DN11583_c0_g1	UNIPROTKB|H2RKA8	69.2	9.7e-46	101071441	polr2i	GO:0006367	transcription initiation from RNA polymerase II promoter	biological_process	9
TRINITY_DN11591_c0_g2	UNIPROTKB|C3Y261	83.4	1e-70	7241541	BRAFLDRAFT_114927	GO:0005829	cytosol	cellular_component	6
TRINITY_DN11591_c0_g2	UNIPROTKB|C3Y261	83.4	1e-70	7241541	BRAFLDRAFT_114927	GO:0006412	translation	biological_process	8
TRINITY_DN11591_c0_g2	UNIPROTKB|C3Y261	83.4	1e-70	7241541	BRAFLDRAFT_114927	GO:0015935	small ribosomal subunit	cellular_component	7
TRINITY_DN11591_c0_g2	UNIPROTKB|C3Y261	83.4	1e-70	7241541	BRAFLDRAFT_114927	GO:0042254	ribosome biogenesis	biological_process	6
TRINITY_DN11592_c0_g1	UNIPROTKB|F7B0K5	53.8	1.3e-81	-	rpl10a	GO:0000470	maturation of LSU-rRNA	biological_process	12
TRINITY_DN11592_c0_g1	UNIPROTKB|F7B0K5	53.8	1.3e-81	-	rpl10a	GO:0003723	RNA binding	molecular_function	6
TRINITY_DN11592_c0_g1	UNIPROTKB|F7B0K5	53.8	1.3e-81	-	rpl10a	GO:0006412	translation	biological_process	8
TRINITY_DN11592_c0_g1	UNIPROTKB|F7B0K5	53.8	1.3e-81	-	rpl10a	GO:0022625	cytosolic large ribosomal subunit	cellular_component	8
TRINITY_DN11593_c0_g1	RGD|1565817	38.8	5.7e-21	100912042	Surf2	GO:0005634	nucleus	cellular_component	6
TRINITY_DN11593_c0_g1	RGD|1565817	38.8	5.7e-21	100912042	Surf2	GO:0005730	nucleolus	cellular_component	6
TRINITY_DN11593_c0_g1	RGD|1565817	38.8	5.7e-21	100912042	Surf2	GO:0005886	plasma membrane	cellular_component	4
TRINITY_DN11593_c0_g1	RGD|1565817	38.8	5.7e-21	100912042	Surf2	GO:0016607	nuclear speck	cellular_component	8
TRINITY_DN1160_c0_g1	MGI|MGI:98783	100	2e-38	21954	Tnni3	GO:0001570	vasculogenesis	biological_process	6
TRINITY_DN1160_c0_g1	MGI|MGI:98783	100	2e-38	21954	Tnni3	GO:0001980	regulation of systemic arterial blood pressure by ischemic conditions	biological_process	7
TRINITY_DN1160_c0_g1	MGI|MGI:98783	100	2e-38	21954	Tnni3	GO:0003009	skeletal muscle contraction	biological_process	8
TRINITY_DN1160_c0_g1	MGI|MGI:98783	100	2e-38	21954	Tnni3	GO:0003779	actin binding	molecular_function	6
TRINITY_DN1160_c0_g1	MGI|MGI:98783	100	2e-38	21954	Tnni3	GO:0005737	cytoplasm	cellular_component	5
TRINITY_DN1160_c0_g1	MGI|MGI:98783	100	2e-38	21954	Tnni3	GO:0005861	troponin complex	cellular_component	4
TRINITY_DN1160_c0_g1	MGI|MGI:98783	100	2e-38	21954	Tnni3	GO:0006874	cellular calcium ion homeostasis	biological_process	11
TRINITY_DN1160_c0_g1	MGI|MGI:98783	100	2e-38	21954	Tnni3	GO:0006936	muscle contraction	biological_process	6
TRINITY_DN1160_c0_g1	MGI|MGI:98783	100	2e-38	21954	Tnni3	GO:0006937	regulation of muscle contraction	biological_process	8
TRINITY_DN1160_c0_g1	MGI|MGI:98783	100	2e-38	21954	Tnni3	GO:0006940	regulation of smooth muscle contraction	biological_process	9
TRINITY_DN1160_c0_g1	MGI|MGI:98783	100	2e-38	21954	Tnni3	GO:0006941	striated muscle contraction	biological_process	7
TRINITY_DN1160_c0_g1	MGI|MGI:98783	100	2e-38	21954	Tnni3	GO:0007507	heart development	biological_process	6
TRINITY_DN1160_c0_g1	MGI|MGI:98783	100	2e-38	21954	Tnni3	GO:0010882	regulation of cardiac muscle contraction by calcium ion signaling	biological_process	8
TRINITY_DN1160_c0_g1	MGI|MGI:98783	100	2e-38	21954	Tnni3	GO:0019855	calcium channel inhibitor activity	molecular_function	7
TRINITY_DN1160_c0_g1	MGI|MGI:98783	100	2e-38	21954	Tnni3	GO:0019901	protein kinase binding	molecular_function	7
TRINITY_DN1160_c0_g1	MGI|MGI:98783	100	2e-38	21954	Tnni3	GO:0019904	protein domain specific binding	molecular_function	5
TRINITY_DN1160_c0_g1	MGI|MGI:98783	100	2e-38	21954	Tnni3	GO:0030016	myofibril	cellular_component	7
TRINITY_DN1160_c0_g1	MGI|MGI:98783	100	2e-38	21954	Tnni3	GO:0030017	sarcomere	cellular_component	5
TRINITY_DN1160_c0_g1	MGI|MGI:98783	100	2e-38	21954	Tnni3	GO:0030172	troponin C binding	molecular_function	6
TRINITY_DN1160_c0_g1	MGI|MGI:98783	100	2e-38	21954	Tnni3	GO:0031014	troponin T binding	molecular_function	6
TRINITY_DN1160_c0_g1	MGI|MGI:98783	100	2e-38	21954	Tnni3	GO:0032780	negative regulation of ATPase activity	biological_process	8
TRINITY_DN1160_c0_g1	MGI|MGI:98783	100	2e-38	21954	Tnni3	GO:0043292	contractile fiber	cellular_component	6
TRINITY_DN1160_c0_g1	MGI|MGI:98783	100	2e-38	21954	Tnni3	GO:0046872	metal ion binding	molecular_function	6
TRINITY_DN1160_c0_g1	MGI|MGI:98783	100	2e-38	21954	Tnni3	GO:0048306	calcium-dependent protein binding	molecular_function	5
TRINITY_DN1160_c0_g1	MGI|MGI:98783	100	2e-38	21954	Tnni3	GO:0051015	actin filament binding	molecular_function	7
TRINITY_DN1160_c0_g1	MGI|MGI:98783	100	2e-38	21954	Tnni3	GO:0055010	ventricular cardiac muscle tissue morphogenesis	biological_process	8
TRINITY_DN1160_c0_g1	MGI|MGI:98783	100	2e-38	21954	Tnni3	GO:0060047	heart contraction	biological_process	7
TRINITY_DN1160_c0_g1	MGI|MGI:98783	100	2e-38	21954	Tnni3	GO:0060048	cardiac muscle contraction	biological_process	8
TRINITY_DN1160_c0_g1	MGI|MGI:98783	100	2e-38	21954	Tnni3	GO:0097512	cardiac myofibril	cellular_component	8
TRINITY_DN1160_c0_g1	MGI|MGI:98783	100	2e-38	21954	Tnni3	GO:1990584	cardiac Troponin complex	cellular_component	5
TRINITY_DN11620_c0_g1	UNIPROTKB|Q5BIM1	22.7	1.2e-20	539091	TRIM45	GO:0005654	nucleoplasm	cellular_component	6
TRINITY_DN11620_c0_g1	UNIPROTKB|Q5BIM1	22.7	1.2e-20	539091	TRIM45	GO:0005737	cytoplasm	cellular_component	5
TRINITY_DN11620_c0_g1	UNIPROTKB|Q5BIM1	22.7	1.2e-20	539091	TRIM45	GO:0008270	zinc ion binding	molecular_function	8
TRINITY_DN11620_c0_g1	UNIPROTKB|Q5BIM1	22.7	1.2e-20	539091	TRIM45	GO:0045171	intercellular bridge	cellular_component	4
TRINITY_DN11620_c0_g1	UNIPROTKB|Q5BIM1	22.7	1.2e-20	539091	TRIM45	GO:0060348	bone development	biological_process	6
TRINITY_DN11626_c0_g1	UNIPROTKB|F1NT19	65.7	3.2e-85	-	SOD2	GO:0001306	age-dependent response to oxidative stress	biological_process	6
TRINITY_DN11626_c0_g1	UNIPROTKB|F1NT19	65.7	3.2e-85	-	SOD2	GO:0001836	release of cytochrome c from mitochondria	biological_process	8
TRINITY_DN11626_c0_g1	UNIPROTKB|F1NT19	65.7	3.2e-85	-	SOD2	GO:0001889	liver development	biological_process	7
TRINITY_DN11626_c0_g1	UNIPROTKB|F1NT19	65.7	3.2e-85	-	SOD2	GO:0003032	detection of oxygen	biological_process	6
TRINITY_DN11626_c0_g1	UNIPROTKB|F1NT19	65.7	3.2e-85	-	SOD2	GO:0003069	acetylcholine-mediated vasodilation involved in regulation of systemic arterial blood pressure	biological_process	8
TRINITY_DN11626_c0_g1	UNIPROTKB|F1NT19	65.7	3.2e-85	-	SOD2	GO:0004784	superoxide dismutase activity	molecular_function	4
TRINITY_DN11626_c0_g1	UNIPROTKB|F1NT19	65.7	3.2e-85	-	SOD2	GO:0005743	mitochondrial inner membrane	cellular_component	6
TRINITY_DN11626_c0_g1	UNIPROTKB|F1NT19	65.7	3.2e-85	-	SOD2	GO:0006357	regulation of transcription by RNA polymerase II	biological_process	9
TRINITY_DN11626_c0_g1	UNIPROTKB|F1NT19	65.7	3.2e-85	-	SOD2	GO:0006749	glutathione metabolic process	biological_process	8
TRINITY_DN11626_c0_g1	UNIPROTKB|F1NT19	65.7	3.2e-85	-	SOD2	GO:0007507	heart development	biological_process	6
TRINITY_DN11626_c0_g1	UNIPROTKB|F1NT19	65.7	3.2e-85	-	SOD2	GO:0007626	locomotory behavior	biological_process	4
TRINITY_DN11626_c0_g1	UNIPROTKB|F1NT19	65.7	3.2e-85	-	SOD2	GO:0008630	intrinsic apoptotic signaling pathway in response to DNA damage	biological_process	7
TRINITY_DN11626_c0_g1	UNIPROTKB|F1NT19	65.7	3.2e-85	-	SOD2	GO:0008631	intrinsic apoptotic signaling pathway in response to oxidative stress	biological_process	7
TRINITY_DN11626_c0_g1	UNIPROTKB|F1NT19	65.7	3.2e-85	-	SOD2	GO:0009791	post-embryonic development	biological_process	4
TRINITY_DN11626_c0_g1	UNIPROTKB|F1NT19	65.7	3.2e-85	-	SOD2	GO:0010332	response to gamma radiation	biological_process	7
TRINITY_DN11626_c0_g1	UNIPROTKB|F1NT19	65.7	3.2e-85	-	SOD2	GO:0014823	response to activity	biological_process	4
TRINITY_DN11626_c0_g1	UNIPROTKB|F1NT19	65.7	3.2e-85	-	SOD2	GO:0019430	removal of superoxide radicals	biological_process	7
TRINITY_DN11626_c0_g1	UNIPROTKB|F1NT19	65.7	3.2e-85	-	SOD2	GO:0022904	respiratory electron transport chain	biological_process	7
TRINITY_DN11626_c0_g1	UNIPROTKB|F1NT19	65.7	3.2e-85	-	SOD2	GO:0030097	hemopoiesis	biological_process	7
TRINITY_DN11626_c0_g1	UNIPROTKB|F1NT19	65.7	3.2e-85	-	SOD2	GO:0042542	response to hydrogen peroxide	biological_process	7
TRINITY_DN11626_c0_g1	UNIPROTKB|F1NT19	65.7	3.2e-85	-	SOD2	GO:0042554	superoxide anion generation	biological_process	7
TRINITY_DN11626_c0_g1	UNIPROTKB|F1NT19	65.7	3.2e-85	-	SOD2	GO:0043209	myelin sheath	cellular_component	4
TRINITY_DN11626_c0_g1	UNIPROTKB|F1NT19	65.7	3.2e-85	-	SOD2	GO:0045429	positive regulation of nitric oxide biosynthetic process	biological_process	9
TRINITY_DN11626_c0_g1	UNIPROTKB|F1NT19	65.7	3.2e-85	-	SOD2	GO:0045599	negative regulation of fat cell differentiation	biological_process	8
TRINITY_DN11626_c0_g1	UNIPROTKB|F1NT19	65.7	3.2e-85	-	SOD2	GO:0046872	metal ion binding	molecular_function	6
TRINITY_DN11626_c0_g1	UNIPROTKB|F1NT19	65.7	3.2e-85	-	SOD2	GO:0048147	negative regulation of fibroblast proliferation	biological_process	8
TRINITY_DN11626_c0_g1	UNIPROTKB|F1NT19	65.7	3.2e-85	-	SOD2	GO:0048666	neuron development	biological_process	6
TRINITY_DN11626_c0_g1	UNIPROTKB|F1NT19	65.7	3.2e-85	-	SOD2	GO:0048678	response to axon injury	biological_process	6
TRINITY_DN11626_c0_g1	UNIPROTKB|F1NT19	65.7	3.2e-85	-	SOD2	GO:0048773	erythrophore differentiation	biological_process	7
TRINITY_DN11626_c0_g1	UNIPROTKB|F1NT19	65.7	3.2e-85	-	SOD2	GO:0050790	regulation of catalytic activity	biological_process	5
TRINITY_DN11626_c0_g1	UNIPROTKB|F1NT19	65.7	3.2e-85	-	SOD2	GO:0051881	regulation of mitochondrial membrane potential	biological_process	6
TRINITY_DN11626_c0_g1	UNIPROTKB|F1NT19	65.7	3.2e-85	-	SOD2	GO:0055072	iron ion homeostasis	biological_process	11
TRINITY_DN11626_c0_g1	UNIPROTKB|F1NT19	65.7	3.2e-85	-	SOD2	GO:0055093	response to hyperoxia	biological_process	5
TRINITY_DN11628_c0_g2	ZFIN|ZDB-GENE-030131-8585	77	9.6e-60	336641	rpl17	GO:0003735	structural constituent of ribosome	molecular_function	4
TRINITY_DN11628_c0_g2	ZFIN|ZDB-GENE-030131-8585	77	9.6e-60	336641	rpl17	GO:0005622	intracellular	cellular_component	4
TRINITY_DN11628_c0_g2	ZFIN|ZDB-GENE-030131-8585	77	9.6e-60	336641	rpl17	GO:0005840	ribosome	cellular_component	6
TRINITY_DN11628_c0_g2	ZFIN|ZDB-GENE-030131-8585	77	9.6e-60	336641	rpl17	GO:0006412	translation	biological_process	8
TRINITY_DN11628_c0_g2	ZFIN|ZDB-GENE-030131-8585	77	9.6e-60	336641	rpl17	GO:0015934	large ribosomal subunit	cellular_component	7
TRINITY_DN11630_c0_g1	UNIPROTKB|A7SUQ5	52.8	1.6e-29	5503642	v1g247521	GO:0000027	ribosomal large subunit assembly	biological_process	9
TRINITY_DN11630_c0_g1	UNIPROTKB|A7SUQ5	52.8	1.6e-29	5503642	v1g247521	GO:0003735	structural constituent of ribosome	molecular_function	4
TRINITY_DN11630_c0_g1	UNIPROTKB|A7SUQ5	52.8	1.6e-29	5503642	v1g247521	GO:0006412	translation	biological_process	8
TRINITY_DN11630_c0_g1	UNIPROTKB|A7SUQ5	52.8	1.6e-29	5503642	v1g247521	GO:0022625	cytosolic large ribosomal subunit	cellular_component	8
TRINITY_DN11630_c0_g1	UNIPROTKB|A7SUQ5	52.8	1.6e-29	5503642	v1g247521	GO:1902626	assembly of large subunit precursor of preribosome	biological_process	9
TRINITY_DN11630_c0_g2	UNIPROTKB|A7SSI1	57.7	9.8e-56	5504525	v1g247133	GO:0000398	mRNA splicing, via spliceosome	biological_process	13
TRINITY_DN11630_c0_g2	UNIPROTKB|A7SSI1	57.7	9.8e-56	5504525	v1g247133	GO:0000974	Prp19 complex	cellular_component	4
TRINITY_DN11630_c0_g2	UNIPROTKB|A7SSI1	57.7	9.8e-56	5504525	v1g247133	GO:0005662	DNA replication factor A complex	cellular_component	4
TRINITY_DN11630_c0_g2	UNIPROTKB|A7SSI1	57.7	9.8e-56	5504525	v1g247133	GO:0071011	precatalytic spliceosome	cellular_component	7
TRINITY_DN11630_c0_g2	UNIPROTKB|A7SSI1	57.7	9.8e-56	5504525	v1g247133	GO:0071013	catalytic step 2 spliceosome	cellular_component	7
TRINITY_DN11630_c0_g2	UNIPROTKB|A7SSI1	57.7	9.8e-56	5504525	v1g247133	GO:0080008	Cul4-RING E3 ubiquitin ligase complex	cellular_component	7
TRINITY_DN11631_c0_g1	UNIPROTKB|E1C8A6	50	1.2e-61	422201	E1C8A6	GO:0000152	nuclear ubiquitin ligase complex	cellular_component	6
TRINITY_DN11631_c0_g1	UNIPROTKB|E1C8A6	50	1.2e-61	422201	E1C8A6	GO:0004843	thiol-dependent ubiquitin-specific protease activity	molecular_function	10
TRINITY_DN11631_c0_g1	UNIPROTKB|E1C8A6	50	1.2e-61	422201	E1C8A6	GO:0005654	nucleoplasm	cellular_component	6
TRINITY_DN11631_c0_g1	UNIPROTKB|E1C8A6	50	1.2e-61	422201	E1C8A6	GO:0006302	double-strand break repair	biological_process	9
TRINITY_DN11631_c0_g1	UNIPROTKB|E1C8A6	50	1.2e-61	422201	E1C8A6	GO:0008237	metallopeptidase activity	molecular_function	7
TRINITY_DN11631_c0_g1	UNIPROTKB|E1C8A6	50	1.2e-61	422201	E1C8A6	GO:0010165	response to X-ray	biological_process	7
TRINITY_DN11631_c0_g1	UNIPROTKB|E1C8A6	50	1.2e-61	422201	E1C8A6	GO:0030234	enzyme regulator activity	molecular_function	4
TRINITY_DN11631_c0_g1	UNIPROTKB|E1C8A6	50	1.2e-61	422201	E1C8A6	GO:0031572	G2 DNA damage checkpoint	biological_process	8
TRINITY_DN11631_c0_g1	UNIPROTKB|E1C8A6	50	1.2e-61	422201	E1C8A6	GO:0031593	polyubiquitin modification-dependent protein binding	molecular_function	6
TRINITY_DN11631_c0_g1	UNIPROTKB|E1C8A6	50	1.2e-61	422201	E1C8A6	GO:0045739	positive regulation of DNA repair	biological_process	10
TRINITY_DN11631_c0_g1	UNIPROTKB|E1C8A6	50	1.2e-61	422201	E1C8A6	GO:0050790	regulation of catalytic activity	biological_process	5
TRINITY_DN11631_c0_g1	UNIPROTKB|E1C8A6	50	1.2e-61	422201	E1C8A6	GO:0070531	BRCA1-A complex	cellular_component	4
TRINITY_DN11631_c0_g1	UNIPROTKB|E1C8A6	50	1.2e-61	422201	E1C8A6	GO:0070537	histone H2A K63-linked deubiquitination	biological_process	11
TRINITY_DN11631_c0_g1	UNIPROTKB|E1C8A6	50	1.2e-61	422201	E1C8A6	GO:0070552	BRISC complex	cellular_component	4
TRINITY_DN11632_c0_g1	UNIPROTKB|F1NSS7	70.6	2.8e-59	-	BRIX1	GO:0000027	ribosomal large subunit assembly	biological_process	9
TRINITY_DN11632_c0_g1	UNIPROTKB|F1NSS7	70.6	2.8e-59	-	BRIX1	GO:0003723	RNA binding	molecular_function	6
TRINITY_DN11632_c0_g1	UNIPROTKB|F1NSS7	70.6	2.8e-59	-	BRIX1	GO:0005730	nucleolus	cellular_component	6
TRINITY_DN11648_c0_g1	UNIPROTKB|B7PKS5	67.4	2.9e-28	8053043	IscW_ISCW005364	GO:0005634	nucleus	cellular_component	6
TRINITY_DN11648_c0_g1	UNIPROTKB|B7PKS5	67.4	2.9e-28	8053043	IscW_ISCW005364	GO:0016925	protein sumoylation	biological_process	11
TRINITY_DN11648_c0_g1	UNIPROTKB|B7PKS5	67.4	2.9e-28	8053043	IscW_ISCW005364	GO:0031386	protein tag	molecular_function	3
TRINITY_DN11648_c0_g2	UNIPROTKB|H2RLE5	52	5.5e-22	-	H2RLE5	GO:0003735	structural constituent of ribosome	molecular_function	4
TRINITY_DN11648_c0_g2	UNIPROTKB|H2RLE5	52	5.5e-22	-	H2RLE5	GO:0005762	mitochondrial large ribosomal subunit	cellular_component	9
TRINITY_DN11651_c0_g1	UNIPROTKB|E2R7M2	72.6	2.2e-32	480834	HCCS	GO:0004408	holocytochrome-c synthase activity	molecular_function	6
TRINITY_DN11651_c0_g1	UNIPROTKB|E2R7M2	72.6	2.2e-32	480834	HCCS	GO:0005739	mitochondrion	cellular_component	6
TRINITY_DN11652_c0_g2	UNIPROTKB|J3KNF4	44.1	1.4e-33	-	CCS	GO:0004784	superoxide dismutase activity	molecular_function	4
TRINITY_DN11652_c0_g2	UNIPROTKB|J3KNF4	44.1	1.4e-33	-	CCS	GO:0016532	superoxide dismutase copper chaperone activity	molecular_function	6
TRINITY_DN11652_c0_g2	UNIPROTKB|J3KNF4	44.1	1.4e-33	-	CCS	GO:0019430	removal of superoxide radicals	biological_process	7
TRINITY_DN11652_c0_g2	UNIPROTKB|J3KNF4	44.1	1.4e-33	-	CCS	GO:0030001	metal ion transport	biological_process	8
TRINITY_DN11652_c0_g2	UNIPROTKB|J3KNF4	44.1	1.4e-33	-	CCS	GO:0043085	positive regulation of catalytic activity	biological_process	6
TRINITY_DN11652_c0_g2	UNIPROTKB|J3KNF4	44.1	1.4e-33	-	CCS	GO:0055114	oxidation-reduction process	biological_process	4
TRINITY_DN11660_c0_g1	ZFIN|ZDB-GENE-050419-138	42.3	2.2e-19	555174	wash1	GO:0003779	actin binding	molecular_function	6
TRINITY_DN11660_c0_g1	ZFIN|ZDB-GENE-050419-138	42.3	2.2e-19	555174	wash1	GO:0005768	endosome	cellular_component	7
TRINITY_DN11660_c0_g1	ZFIN|ZDB-GENE-050419-138	42.3	2.2e-19	555174	wash1	GO:0005769	early endosome	cellular_component	8
TRINITY_DN11660_c0_g1	ZFIN|ZDB-GENE-050419-138	42.3	2.2e-19	555174	wash1	GO:0015031	protein transport	biological_process	9
TRINITY_DN11660_c0_g1	ZFIN|ZDB-GENE-050419-138	42.3	2.2e-19	555174	wash1	GO:0016020	membrane	cellular_component	3
TRINITY_DN11660_c0_g1	ZFIN|ZDB-GENE-050419-138	42.3	2.2e-19	555174	wash1	GO:0016197	endosomal transport	biological_process	7
TRINITY_DN11660_c0_g1	ZFIN|ZDB-GENE-050419-138	42.3	2.2e-19	555174	wash1	GO:0031901	early endosome membrane	cellular_component	9
TRINITY_DN11660_c0_g1	ZFIN|ZDB-GENE-050419-138	42.3	2.2e-19	555174	wash1	GO:0034314	Arp2/3 complex-mediated actin nucleation	biological_process	8
TRINITY_DN11660_c0_g1	ZFIN|ZDB-GENE-050419-138	42.3	2.2e-19	555174	wash1	GO:0042147	retrograde transport, endosome to Golgi	biological_process	8
TRINITY_DN11660_c0_g1	ZFIN|ZDB-GENE-050419-138	42.3	2.2e-19	555174	wash1	GO:0043014	alpha-tubulin binding	molecular_function	7
TRINITY_DN11660_c0_g1	ZFIN|ZDB-GENE-050419-138	42.3	2.2e-19	555174	wash1	GO:0055037	recycling endosome	cellular_component	8
TRINITY_DN11660_c0_g1	ZFIN|ZDB-GENE-050419-138	42.3	2.2e-19	555174	wash1	GO:0055038	recycling endosome membrane	cellular_component	9
TRINITY_DN11660_c0_g1	ZFIN|ZDB-GENE-050419-138	42.3	2.2e-19	555174	wash1	GO:0071203	WASH complex	cellular_component	4
TRINITY_DN11660_c0_g3	MGI|MGI:1916017	55.9	4.2e-30	68767	Washc1	GO:0000145	exocyst	cellular_component	7
TRINITY_DN11660_c0_g3	MGI|MGI:1916017	55.9	4.2e-30	68767	Washc1	GO:0001556	oocyte maturation	biological_process	5
TRINITY_DN11660_c0_g3	MGI|MGI:1916017	55.9	4.2e-30	68767	Washc1	GO:0002468	dendritic cell antigen processing and presentation	biological_process	5
TRINITY_DN11660_c0_g3	MGI|MGI:1916017	55.9	4.2e-30	68767	Washc1	GO:0003779	actin binding	molecular_function	6
TRINITY_DN11660_c0_g3	MGI|MGI:1916017	55.9	4.2e-30	68767	Washc1	GO:0005737	cytoplasm	cellular_component	5
TRINITY_DN11660_c0_g3	MGI|MGI:1916017	55.9	4.2e-30	68767	Washc1	GO:0005768	endosome	cellular_component	7
TRINITY_DN11660_c0_g3	MGI|MGI:1916017	55.9	4.2e-30	68767	Washc1	GO:0005769	early endosome	cellular_component	8
TRINITY_DN11660_c0_g3	MGI|MGI:1916017	55.9	4.2e-30	68767	Washc1	GO:0005776	autophagosome	cellular_component	7
TRINITY_DN11660_c0_g3	MGI|MGI:1916017	55.9	4.2e-30	68767	Washc1	GO:0005813	centrosome	cellular_component	7
TRINITY_DN11660_c0_g3	MGI|MGI:1916017	55.9	4.2e-30	68767	Washc1	GO:0005856	cytoskeleton	cellular_component	6
TRINITY_DN11660_c0_g3	MGI|MGI:1916017	55.9	4.2e-30	68767	Washc1	GO:0006887	exocytosis	biological_process	7
TRINITY_DN11660_c0_g3	MGI|MGI:1916017	55.9	4.2e-30	68767	Washc1	GO:0007032	endosome organization	biological_process	7
TRINITY_DN11660_c0_g3	MGI|MGI:1916017	55.9	4.2e-30	68767	Washc1	GO:0010507	negative regulation of autophagy	biological_process	9
TRINITY_DN11660_c0_g3	MGI|MGI:1916017	55.9	4.2e-30	68767	Washc1	GO:0016020	membrane	cellular_component	3
TRINITY_DN11660_c0_g3	MGI|MGI:1916017	55.9	4.2e-30	68767	Washc1	GO:0016197	endosomal transport	biological_process	7
TRINITY_DN11660_c0_g3	MGI|MGI:1916017	55.9	4.2e-30	68767	Washc1	GO:0022617	extracellular matrix disassembly	biological_process	6
TRINITY_DN11660_c0_g3	MGI|MGI:1916017	55.9	4.2e-30	68767	Washc1	GO:0030335	positive regulation of cell migration	biological_process	8
TRINITY_DN11660_c0_g3	MGI|MGI:1916017	55.9	4.2e-30	68767	Washc1	GO:0030833	regulation of actin filament polymerization	biological_process	8
TRINITY_DN11660_c0_g3	MGI|MGI:1916017	55.9	4.2e-30	68767	Washc1	GO:0031083	BLOC-1 complex	cellular_component	5
TRINITY_DN11660_c0_g3	MGI|MGI:1916017	55.9	4.2e-30	68767	Washc1	GO:0031274	positive regulation of pseudopodium assembly	biological_process	11
TRINITY_DN11660_c0_g3	MGI|MGI:1916017	55.9	4.2e-30	68767	Washc1	GO:0031396	regulation of protein ubiquitination	biological_process	10
TRINITY_DN11660_c0_g3	MGI|MGI:1916017	55.9	4.2e-30	68767	Washc1	GO:0031410	cytoplasmic vesicle	cellular_component	6
TRINITY_DN11660_c0_g3	MGI|MGI:1916017	55.9	4.2e-30	68767	Washc1	GO:0031625	ubiquitin protein ligase binding	molecular_function	7
TRINITY_DN11660_c0_g3	MGI|MGI:1916017	55.9	4.2e-30	68767	Washc1	GO:0034314	Arp2/3 complex-mediated actin nucleation	biological_process	8
TRINITY_DN11660_c0_g3	MGI|MGI:1916017	55.9	4.2e-30	68767	Washc1	GO:0034383	low-density lipoprotein particle clearance	biological_process	5
TRINITY_DN11660_c0_g3	MGI|MGI:1916017	55.9	4.2e-30	68767	Washc1	GO:0034394	protein localization to cell surface	biological_process	7
TRINITY_DN11660_c0_g3	MGI|MGI:1916017	55.9	4.2e-30	68767	Washc1	GO:0040038	polar body extrusion after meiotic divisions	biological_process	5
TRINITY_DN11660_c0_g3	MGI|MGI:1916017	55.9	4.2e-30	68767	Washc1	GO:0042098	T cell proliferation	biological_process	8
TRINITY_DN11660_c0_g3	MGI|MGI:1916017	55.9	4.2e-30	68767	Washc1	GO:0042147	retrograde transport, endosome to Golgi	biological_process	8
TRINITY_DN11660_c0_g3	MGI|MGI:1916017	55.9	4.2e-30	68767	Washc1	GO:0043014	alpha-tubulin binding	molecular_function	7
TRINITY_DN11660_c0_g3	MGI|MGI:1916017	55.9	4.2e-30	68767	Washc1	GO:0043015	gamma-tubulin binding	molecular_function	7
TRINITY_DN11660_c0_g3	MGI|MGI:1916017	55.9	4.2e-30	68767	Washc1	GO:0043231	intracellular membrane-bounded organelle	cellular_component	5
TRINITY_DN11660_c0_g3	MGI|MGI:1916017	55.9	4.2e-30	68767	Washc1	GO:0043553	negative regulation of phosphatidylinositol 3-kinase activity	biological_process	10
TRINITY_DN11660_c0_g3	MGI|MGI:1916017	55.9	4.2e-30	68767	Washc1	GO:0050750	low-density lipoprotein particle receptor binding	molecular_function	7
TRINITY_DN11660_c0_g3	MGI|MGI:1916017	55.9	4.2e-30	68767	Washc1	GO:0050776	regulation of immune response	biological_process	6
TRINITY_DN11660_c0_g3	MGI|MGI:1916017	55.9	4.2e-30	68767	Washc1	GO:0055037	recycling endosome	cellular_component	8
TRINITY_DN11660_c0_g3	MGI|MGI:1916017	55.9	4.2e-30	68767	Washc1	GO:0071203	WASH complex	cellular_component	4
TRINITY_DN11660_c0_g3	MGI|MGI:1916017	55.9	4.2e-30	68767	Washc1	GO:0071437	invadopodium	cellular_component	6
TRINITY_DN11660_c0_g3	MGI|MGI:1916017	55.9	4.2e-30	68767	Washc1	GO:0090306	spindle assembly involved in meiosis	biological_process	10
TRINITY_DN11660_c0_g3	MGI|MGI:1916017	55.9	4.2e-30	68767	Washc1	GO:0099638	endosome to plasma membrane protein transport	biological_process	11
TRINITY_DN11660_c0_g3	MGI|MGI:1916017	55.9	4.2e-30	68767	Washc1	GO:1904109	positive regulation of cholesterol import	biological_process	11
TRINITY_DN11660_c0_g3	MGI|MGI:1916017	55.9	4.2e-30	68767	Washc1	GO:1990126	retrograde transport, endosome to plasma membrane	biological_process	8
TRINITY_DN11660_c0_g3	MGI|MGI:1916017	55.9	4.2e-30	68767	Washc1	GO:2000010	positive regulation of protein localization to cell surface	biological_process	7
TRINITY_DN11670_c0_g1	UNIPROTKB|Q0ZIV9	100	6.5e-33	4025013	rps7-A	GO:0000028	ribosomal small subunit assembly	biological_process	9
TRINITY_DN11670_c0_g1	UNIPROTKB|Q0ZIV9	100	6.5e-33	4025013	rps7-A	GO:0003729	mRNA binding	molecular_function	7
TRINITY_DN11670_c0_g1	UNIPROTKB|Q0ZIV9	100	6.5e-33	4025013	rps7-A	GO:0003735	structural constituent of ribosome	molecular_function	4
TRINITY_DN11670_c0_g1	UNIPROTKB|Q0ZIV9	100	6.5e-33	4025013	rps7-A	GO:0005840	ribosome	cellular_component	6
TRINITY_DN11670_c0_g1	UNIPROTKB|Q0ZIV9	100	6.5e-33	4025013	rps7-A	GO:0006412	translation	biological_process	8
TRINITY_DN11670_c0_g1	UNIPROTKB|Q0ZIV9	100	6.5e-33	4025013	rps7-A	GO:0019843	rRNA binding	molecular_function	7
TRINITY_DN11670_c0_g2	UNIPROTKB|A4GYN8	93.2	1.9e-32	4929628	rps12-B	GO:0003735	structural constituent of ribosome	molecular_function	4
TRINITY_DN11670_c0_g2	UNIPROTKB|A4GYN8	93.2	1.9e-32	4929628	rps12-B	GO:0005840	ribosome	cellular_component	6
TRINITY_DN11670_c0_g2	UNIPROTKB|A4GYN8	93.2	1.9e-32	4929628	rps12-B	GO:0006412	translation	biological_process	8
TRINITY_DN11670_c0_g3	UNIPROTKB|P0C344	59	1e-15	-	ndhA	GO:0009536	plastid	cellular_component	6
TRINITY_DN11690_c0_g1	UNIPROTKB|Q401B9	50.4	2.7e-33	423561	CNI	GO:0006810	transport	biological_process	5
TRINITY_DN11690_c0_g1	UNIPROTKB|Q401B9	50.4	2.7e-33	423561	CNI	GO:0016021	integral component of membrane	cellular_component	5
TRINITY_DN11690_c0_g2	UNIPROTKB|P60984	61.5	1.8e-47	615255	GMFB	GO:0003779	actin binding	molecular_function	6
TRINITY_DN11690_c0_g2	UNIPROTKB|P60984	61.5	1.8e-47	615255	GMFB	GO:0005622	intracellular	cellular_component	4
TRINITY_DN11690_c0_g2	UNIPROTKB|P60984	61.5	1.8e-47	615255	GMFB	GO:0007612	learning	biological_process	5
TRINITY_DN11690_c0_g2	UNIPROTKB|P60984	61.5	1.8e-47	615255	GMFB	GO:0007626	locomotory behavior	biological_process	4
TRINITY_DN11690_c0_g2	UNIPROTKB|P60984	61.5	1.8e-47	615255	GMFB	GO:0008083	growth factor activity	molecular_function	7
TRINITY_DN11690_c0_g2	UNIPROTKB|P60984	61.5	1.8e-47	615255	GMFB	GO:0034316	negative regulation of Arp2/3 complex-mediated actin nucleation	biological_process	11
TRINITY_DN11690_c0_g2	UNIPROTKB|P60984	61.5	1.8e-47	615255	GMFB	GO:0071933	Arp2/3 complex binding	molecular_function	5
TRINITY_DN11703_c0_g1	UNIPROTKB|Q6PBF0	80	3.7e-95	394521	rpl8	GO:0002181	cytoplasmic translation	biological_process	9
TRINITY_DN11703_c0_g1	UNIPROTKB|Q6PBF0	80	3.7e-95	394521	rpl8	GO:0003735	structural constituent of ribosome	molecular_function	4
TRINITY_DN11703_c0_g1	UNIPROTKB|Q6PBF0	80	3.7e-95	394521	rpl8	GO:0022625	cytosolic large ribosomal subunit	cellular_component	8
TRINITY_DN11713_c0_g1	UNIPROTKB|F1NW85	49	3.5e-73	772201	ASPG	GO:0004067	asparaginase activity	molecular_function	7
TRINITY_DN11713_c0_g1	UNIPROTKB|F1NW85	49	3.5e-73	772201	ASPG	GO:0006520	cellular amino acid metabolic process	biological_process	8
TRINITY_DN11721_c1_g1	CGD|CAL0000165725	39.4	1.6e-07	8046282	Cd36_22670	GO:0003676	nucleic acid binding	molecular_function	5
TRINITY_DN11721_c1_g1	CGD|CAL0000165725	39.4	1.6e-07	8046282	Cd36_22670	GO:0003723	RNA binding	molecular_function	6
TRINITY_DN11721_c1_g1	CGD|CAL0000165725	39.4	1.6e-07	8046282	Cd36_22670	GO:0003964	RNA-directed DNA polymerase activity	molecular_function	8
TRINITY_DN11721_c1_g1	CGD|CAL0000165725	39.4	1.6e-07	8046282	Cd36_22670	GO:0006278	RNA-dependent DNA biosynthetic process	biological_process	9
TRINITY_DN11721_c1_g1	CGD|CAL0000165725	39.4	1.6e-07	8046282	Cd36_22670	GO:0015074	DNA integration	biological_process	8
TRINITY_DN11727_c0_g1	UNIPROTKB|F6VXS0	55.7	5.2e-09	-	LOC100186035	GO:0016020	membrane	cellular_component	3
TRINITY_DN11727_c0_g1	UNIPROTKB|F6VXS0	55.7	5.2e-09	-	LOC100186035	GO:0042625	ATPase coupled ion transmembrane transporter activity	molecular_function	6
TRINITY_DN11736_c0_g1	MGI|MGI:88050	100	1.5e-49	11807	Apoa2	GO:0002740	negative regulation of cytokine secretion involved in immune response	biological_process	9
TRINITY_DN11736_c0_g1	MGI|MGI:88050	100	1.5e-49	11807	Apoa2	GO:0005319	lipid transporter activity	molecular_function	4
TRINITY_DN11736_c0_g1	MGI|MGI:88050	100	1.5e-49	11807	Apoa2	GO:0005543	phospholipid binding	molecular_function	5
TRINITY_DN11736_c0_g1	MGI|MGI:88050	100	1.5e-49	11807	Apoa2	GO:0005576	extracellular region	cellular_component	3
TRINITY_DN11736_c0_g1	MGI|MGI:88050	100	1.5e-49	11807	Apoa2	GO:0005615	extracellular space	cellular_component	4
TRINITY_DN11736_c0_g1	MGI|MGI:88050	100	1.5e-49	11807	Apoa2	GO:0006631	fatty acid metabolic process	biological_process	9
TRINITY_DN11736_c0_g1	MGI|MGI:88050	100	1.5e-49	11807	Apoa2	GO:0006656	phosphatidylcholine biosynthetic process	biological_process	10
TRINITY_DN11736_c0_g1	MGI|MGI:88050	100	1.5e-49	11807	Apoa2	GO:0006869	lipid transport	biological_process	7
TRINITY_DN11736_c0_g1	MGI|MGI:88050	100	1.5e-49	11807	Apoa2	GO:0008035	high-density lipoprotein particle binding	molecular_function	7
TRINITY_DN11736_c0_g1	MGI|MGI:88050	100	1.5e-49	11807	Apoa2	GO:0008203	cholesterol metabolic process	biological_process	8
TRINITY_DN11736_c0_g1	MGI|MGI:88050	100	1.5e-49	11807	Apoa2	GO:0008289	lipid binding	molecular_function	4
TRINITY_DN11736_c0_g1	MGI|MGI:88050	100	1.5e-49	11807	Apoa2	GO:0009395	phospholipid catabolic process	biological_process	8
TRINITY_DN11736_c0_g1	MGI|MGI:88050	100	1.5e-49	11807	Apoa2	GO:0009749	response to glucose	biological_process	9
TRINITY_DN11736_c0_g1	MGI|MGI:88050	100	1.5e-49	11807	Apoa2	GO:0010873	positive regulation of cholesterol esterification	biological_process	10
TRINITY_DN11736_c0_g1	MGI|MGI:88050	100	1.5e-49	11807	Apoa2	GO:0010903	negative regulation of very-low-density lipoprotein particle remodeling	biological_process	8
TRINITY_DN11736_c0_g1	MGI|MGI:88050	100	1.5e-49	11807	Apoa2	GO:0015485	cholesterol binding	molecular_function	7
TRINITY_DN11736_c0_g1	MGI|MGI:88050	100	1.5e-49	11807	Apoa2	GO:0015759	beta-glucoside transport	biological_process	10
TRINITY_DN11736_c0_g1	MGI|MGI:88050	100	1.5e-49	11807	Apoa2	GO:0017127	cholesterol transporter activity	molecular_function	6
TRINITY_DN11736_c0_g1	MGI|MGI:88050	100	1.5e-49	11807	Apoa2	GO:0018158	protein oxidation	biological_process	9
TRINITY_DN11736_c0_g1	MGI|MGI:88050	100	1.5e-49	11807	Apoa2	GO:0018206	peptidyl-methionine modification	biological_process	10
TRINITY_DN11736_c0_g1	MGI|MGI:88050	100	1.5e-49	11807	Apoa2	GO:0030300	regulation of intestinal cholesterol absorption	biological_process	10
TRINITY_DN11736_c0_g1	MGI|MGI:88050	100	1.5e-49	11807	Apoa2	GO:0030301	cholesterol transport	biological_process	9
TRINITY_DN11736_c0_g1	MGI|MGI:88050	100	1.5e-49	11807	Apoa2	GO:0031072	heat shock protein binding	molecular_function	5
TRINITY_DN11736_c0_g1	MGI|MGI:88050	100	1.5e-49	11807	Apoa2	GO:0031100	animal organ regeneration	biological_process	6
TRINITY_DN11736_c0_g1	MGI|MGI:88050	100	1.5e-49	11807	Apoa2	GO:0031210	phosphatidylcholine binding	molecular_function	6
TRINITY_DN11736_c0_g1	MGI|MGI:88050	100	1.5e-49	11807	Apoa2	GO:0031647	regulation of protein stability	biological_process	5
TRINITY_DN11736_c0_g1	MGI|MGI:88050	100	1.5e-49	11807	Apoa2	GO:0032375	negative regulation of cholesterol transport	biological_process	10
TRINITY_DN11736_c0_g1	MGI|MGI:88050	100	1.5e-49	11807	Apoa2	GO:0033344	cholesterol efflux	biological_process	10
TRINITY_DN11736_c0_g1	MGI|MGI:88050	100	1.5e-49	11807	Apoa2	GO:0033700	phospholipid efflux	biological_process	9
TRINITY_DN11736_c0_g1	MGI|MGI:88050	100	1.5e-49	11807	Apoa2	GO:0034190	apolipoprotein receptor binding	molecular_function	6
TRINITY_DN11736_c0_g1	MGI|MGI:88050	100	1.5e-49	11807	Apoa2	GO:0034361	very-low-density lipoprotein particle	cellular_component	6
TRINITY_DN11736_c0_g1	MGI|MGI:88050	100	1.5e-49	11807	Apoa2	GO:0034364	high-density lipoprotein particle	cellular_component	5
TRINITY_DN11736_c0_g1	MGI|MGI:88050	100	1.5e-49	11807	Apoa2	GO:0034366	spherical high-density lipoprotein particle	cellular_component	6
TRINITY_DN11736_c0_g1	MGI|MGI:88050	100	1.5e-49	11807	Apoa2	GO:0034370	triglyceride-rich lipoprotein particle remodeling	biological_process	9
TRINITY_DN11736_c0_g1	MGI|MGI:88050	100	1.5e-49	11807	Apoa2	GO:0034374	low-density lipoprotein particle remodeling	biological_process	9
TRINITY_DN11736_c0_g1	MGI|MGI:88050	100	1.5e-49	11807	Apoa2	GO:0034375	high-density lipoprotein particle remodeling	biological_process	9
TRINITY_DN11736_c0_g1	MGI|MGI:88050	100	1.5e-49	11807	Apoa2	GO:0034380	high-density lipoprotein particle assembly	biological_process	9
TRINITY_DN11736_c0_g1	MGI|MGI:88050	100	1.5e-49	11807	Apoa2	GO:0034384	high-density lipoprotein particle clearance	biological_process	5
TRINITY_DN11736_c0_g1	MGI|MGI:88050	100	1.5e-49	11807	Apoa2	GO:0042157	lipoprotein metabolic process	biological_process	7
TRINITY_DN11736_c0_g1	MGI|MGI:88050	100	1.5e-49	11807	Apoa2	GO:0042627	chylomicron	cellular_component	5
TRINITY_DN11736_c0_g1	MGI|MGI:88050	100	1.5e-49	11807	Apoa2	GO:0042632	cholesterol homeostasis	biological_process	9
TRINITY_DN11736_c0_g1	MGI|MGI:88050	100	1.5e-49	11807	Apoa2	GO:0042803	protein homodimerization activity	molecular_function	6
TRINITY_DN11736_c0_g1	MGI|MGI:88050	100	1.5e-49	11807	Apoa2	GO:0043691	reverse cholesterol transport	biological_process	10
TRINITY_DN11736_c0_g1	MGI|MGI:88050	100	1.5e-49	11807	Apoa2	GO:0045416	positive regulation of interleukin-8 biosynthetic process	biological_process	9
TRINITY_DN11736_c0_g1	MGI|MGI:88050	100	1.5e-49	11807	Apoa2	GO:0046340	diacylglycerol catabolic process	biological_process	10
TRINITY_DN11736_c0_g1	MGI|MGI:88050	100	1.5e-49	11807	Apoa2	GO:0046982	protein heterodimerization activity	molecular_function	6
TRINITY_DN11736_c0_g1	MGI|MGI:88050	100	1.5e-49	11807	Apoa2	GO:0050995	negative regulation of lipid catabolic process	biological_process	8
TRINITY_DN11736_c0_g1	MGI|MGI:88050	100	1.5e-49	11807	Apoa2	GO:0050996	positive regulation of lipid catabolic process	biological_process	8
TRINITY_DN11736_c0_g1	MGI|MGI:88050	100	1.5e-49	11807	Apoa2	GO:0055102	lipase inhibitor activity	molecular_function	6
TRINITY_DN11736_c0_g1	MGI|MGI:88050	100	1.5e-49	11807	Apoa2	GO:0060192	negative regulation of lipase activity	biological_process	8
TRINITY_DN11736_c0_g1	MGI|MGI:88050	100	1.5e-49	11807	Apoa2	GO:0060228	phosphatidylcholine-sterol O-acyltransferase activator activity	molecular_function	6
TRINITY_DN11736_c0_g1	MGI|MGI:88050	100	1.5e-49	11807	Apoa2	GO:0060621	negative regulation of cholesterol import	biological_process	11
TRINITY_DN11736_c0_g1	MGI|MGI:88050	100	1.5e-49	11807	Apoa2	GO:0060695	negative regulation of cholesterol transporter activity	biological_process	11
TRINITY_DN11736_c0_g1	MGI|MGI:88050	100	1.5e-49	11807	Apoa2	GO:0070653	high-density lipoprotein particle receptor binding	molecular_function	7
TRINITY_DN11736_c0_g1	MGI|MGI:88050	100	1.5e-49	11807	Apoa2	GO:0072562	blood microparticle	cellular_component	4
TRINITY_DN11736_c0_g2	MGI|MGI:87991	100	4.7e-216	11657	Alb	GO:0003677	DNA binding	molecular_function	6
TRINITY_DN11736_c0_g2	MGI|MGI:87991	100	4.7e-216	11657	Alb	GO:0005504	fatty acid binding	molecular_function	5
TRINITY_DN11736_c0_g2	MGI|MGI:87991	100	4.7e-216	11657	Alb	GO:0005576	extracellular region	cellular_component	3
TRINITY_DN11736_c0_g2	MGI|MGI:87991	100	4.7e-216	11657	Alb	GO:0005604	basement membrane	cellular_component	6
TRINITY_DN11736_c0_g2	MGI|MGI:87991	100	4.7e-216	11657	Alb	GO:0005615	extracellular space	cellular_component	4
TRINITY_DN11736_c0_g2	MGI|MGI:87991	100	4.7e-216	11657	Alb	GO:0005737	cytoplasm	cellular_component	5
TRINITY_DN11736_c0_g2	MGI|MGI:87991	100	4.7e-216	11657	Alb	GO:0005783	endoplasmic reticulum	cellular_component	6
TRINITY_DN11736_c0_g2	MGI|MGI:87991	100	4.7e-216	11657	Alb	GO:0005794	Golgi apparatus	cellular_component	6
TRINITY_DN11736_c0_g2	MGI|MGI:87991	100	4.7e-216	11657	Alb	GO:0008144	drug binding	molecular_function	4
TRINITY_DN11736_c0_g2	MGI|MGI:87991	100	4.7e-216	11657	Alb	GO:0008270	zinc ion binding	molecular_function	8
TRINITY_DN11736_c0_g2	MGI|MGI:87991	100	4.7e-216	11657	Alb	GO:0008289	lipid binding	molecular_function	4
TRINITY_DN11736_c0_g2	MGI|MGI:87991	100	4.7e-216	11657	Alb	GO:0009267	cellular response to starvation	biological_process	8
TRINITY_DN11736_c0_g2	MGI|MGI:87991	100	4.7e-216	11657	Alb	GO:0015643	toxic substance binding	molecular_function	4
TRINITY_DN11736_c0_g2	MGI|MGI:87991	100	4.7e-216	11657	Alb	GO:0019825	oxygen binding	molecular_function	5
TRINITY_DN11736_c0_g2	MGI|MGI:87991	100	4.7e-216	11657	Alb	GO:0019836	hemolysis by symbiont of host erythrocytes	biological_process	10
TRINITY_DN11736_c0_g2	MGI|MGI:87991	100	4.7e-216	11657	Alb	GO:0019899	enzyme binding	molecular_function	5
TRINITY_DN11736_c0_g2	MGI|MGI:87991	100	4.7e-216	11657	Alb	GO:0030170	pyridoxal phosphate binding	molecular_function	6
TRINITY_DN11736_c0_g2	MGI|MGI:87991	100	4.7e-216	11657	Alb	GO:0042802	identical protein binding	molecular_function	5
TRINITY_DN11736_c0_g2	MGI|MGI:87991	100	4.7e-216	11657	Alb	GO:0043066	negative regulation of apoptotic process	biological_process	9
TRINITY_DN11736_c0_g2	MGI|MGI:87991	100	4.7e-216	11657	Alb	GO:0043209	myelin sheath	cellular_component	4
TRINITY_DN11736_c0_g2	MGI|MGI:87991	100	4.7e-216	11657	Alb	GO:0046010	positive regulation of circadian sleep/wake cycle, non-REM sleep	biological_process	9
TRINITY_DN11736_c0_g2	MGI|MGI:87991	100	4.7e-216	11657	Alb	GO:0046872	metal ion binding	molecular_function	6
TRINITY_DN11736_c0_g2	MGI|MGI:87991	100	4.7e-216	11657	Alb	GO:0051087	chaperone binding	molecular_function	5
TRINITY_DN11736_c0_g2	MGI|MGI:87991	100	4.7e-216	11657	Alb	GO:0051659	maintenance of mitochondrion location	biological_process	7
TRINITY_DN11736_c0_g2	MGI|MGI:87991	100	4.7e-216	11657	Alb	GO:0070062	extracellular exosome	cellular_component	7
TRINITY_DN11744_c0_g1	CGD|CAL0128842	30.2	1e-43	2887537	CAGL0E05610g	GO:0000287	magnesium ion binding	molecular_function	7
TRINITY_DN11744_c0_g1	CGD|CAL0128842	30.2	1e-43	2887537	CAGL0E05610g	GO:0004743	pyruvate kinase activity	molecular_function	7
TRINITY_DN11744_c0_g1	CGD|CAL0128842	30.2	1e-43	2887537	CAGL0E05610g	GO:0005739	mitochondrion	cellular_component	6
TRINITY_DN11744_c0_g1	CGD|CAL0128842	30.2	1e-43	2887537	CAGL0E05610g	GO:0005829	cytosol	cellular_component	6
TRINITY_DN11744_c0_g1	CGD|CAL0128842	30.2	1e-43	2887537	CAGL0E05610g	GO:0030955	potassium ion binding	molecular_function	8
TRINITY_DN11744_c0_g1	CGD|CAL0128842	30.2	1e-43	2887537	CAGL0E05610g	GO:0042866	pyruvate biosynthetic process	biological_process	10
TRINITY_DN11744_c0_g1	CGD|CAL0128842	30.2	1e-43	2887537	CAGL0E05610g	GO:0061621	canonical glycolysis	biological_process	6
TRINITY_DN11750_c0_g1	UNIPROTKB|E1C9B1	46	3.2e-37	421761	WASF1	GO:0003779	actin binding	molecular_function	6
TRINITY_DN11750_c0_g1	UNIPROTKB|E1C9B1	46	3.2e-37	421761	WASF1	GO:0005741	mitochondrial outer membrane	cellular_component	6
TRINITY_DN11750_c0_g1	UNIPROTKB|E1C9B1	46	3.2e-37	421761	WASF1	GO:0005856	cytoskeleton	cellular_component	6
TRINITY_DN11750_c0_g1	UNIPROTKB|E1C9B1	46	3.2e-37	421761	WASF1	GO:0016601	Rac protein signal transduction	biological_process	8
TRINITY_DN11750_c0_g1	UNIPROTKB|E1C9B1	46	3.2e-37	421761	WASF1	GO:0030027	lamellipodium	cellular_component	6
TRINITY_DN11750_c0_g1	UNIPROTKB|E1C9B1	46	3.2e-37	421761	WASF1	GO:0030036	actin cytoskeleton organization	biological_process	7
TRINITY_DN11750_c0_g1	UNIPROTKB|E1C9B1	46	3.2e-37	421761	WASF1	GO:0031209	SCAR complex	cellular_component	4
TRINITY_DN11750_c0_g1	UNIPROTKB|E1C9B1	46	3.2e-37	421761	WASF1	GO:0048365	Rac GTPase binding	molecular_function	10
TRINITY_DN11750_c0_g1	UNIPROTKB|E1C9B1	46	3.2e-37	421761	WASF1	GO:0072673	lamellipodium morphogenesis	biological_process	8
TRINITY_DN11750_c0_g1	UNIPROTKB|E1C9B1	46	3.2e-37	421761	WASF1	GO:2000601	positive regulation of Arp2/3 complex-mediated actin nucleation	biological_process	11
TRINITY_DN11751_c0_g1	UNIPROTKB|A7RH61	69.2	4.7e-15	5521443	v1g197081	GO:0071011	precatalytic spliceosome	cellular_component	7
TRINITY_DN11755_c0_g1	TAIR|locus:2044923	49.2	3e-23	818224	DML1	GO:0003677	DNA binding	molecular_function	6
TRINITY_DN11755_c0_g1	TAIR|locus:2044923	49.2	3e-23	818224	DML1	GO:0003906	DNA-(apurinic or apyrimidinic site) lyase activity	molecular_function	5
TRINITY_DN11755_c0_g1	TAIR|locus:2044923	49.2	3e-23	818224	DML1	GO:0005515	protein binding	molecular_function	4
TRINITY_DN11755_c0_g1	TAIR|locus:2044923	49.2	3e-23	818224	DML1	GO:0005634	nucleus	cellular_component	6
TRINITY_DN11755_c0_g1	TAIR|locus:2044923	49.2	3e-23	818224	DML1	GO:0005730	nucleolus	cellular_component	6
TRINITY_DN11755_c0_g1	TAIR|locus:2044923	49.2	3e-23	818224	DML1	GO:0006281	DNA repair	biological_process	8
TRINITY_DN11755_c0_g1	TAIR|locus:2044923	49.2	3e-23	818224	DML1	GO:0006284	base-excision repair	biological_process	9
TRINITY_DN11755_c0_g1	TAIR|locus:2044923	49.2	3e-23	818224	DML1	GO:0006306	DNA methylation	biological_process	10
TRINITY_DN11755_c0_g1	TAIR|locus:2044923	49.2	3e-23	818224	DML1	GO:0006342	chromatin silencing	biological_process	5
TRINITY_DN11755_c0_g1	TAIR|locus:2044923	49.2	3e-23	818224	DML1	GO:0006351	transcription, DNA-templated	biological_process	8
TRINITY_DN11755_c0_g1	TAIR|locus:2044923	49.2	3e-23	818224	DML1	GO:0019104	DNA N-glycosylase activity	molecular_function	7
TRINITY_DN11755_c0_g1	TAIR|locus:2044923	49.2	3e-23	818224	DML1	GO:0031936	negative regulation of chromatin silencing	biological_process	10
TRINITY_DN11755_c0_g1	TAIR|locus:2044923	49.2	3e-23	818224	DML1	GO:0046872	metal ion binding	molecular_function	6
TRINITY_DN11755_c0_g1	TAIR|locus:2044923	49.2	3e-23	818224	DML1	GO:0050832	defense response to fungus	biological_process	8
TRINITY_DN11755_c0_g1	TAIR|locus:2044923	49.2	3e-23	818224	DML1	GO:0051539	4 iron, 4 sulfur cluster binding	molecular_function	6
TRINITY_DN11755_c0_g1	TAIR|locus:2044923	49.2	3e-23	818224	DML1	GO:0080111	DNA demethylation	biological_process	10
TRINITY_DN11759_c0_g1	UNIPROTKB|C3XU33	52.8	3e-181	7218933	BRAFLDRAFT_114443	GO:0005634	nucleus	cellular_component	6
TRINITY_DN11759_c0_g1	UNIPROTKB|C3XU33	52.8	3e-181	7218933	BRAFLDRAFT_114443	GO:0005829	cytosol	cellular_component	6
TRINITY_DN11759_c0_g1	UNIPROTKB|C3XU33	52.8	3e-181	7218933	BRAFLDRAFT_114443	GO:0006355	regulation of transcription, DNA-templated	biological_process	8
TRINITY_DN11759_c0_g1	UNIPROTKB|C3XU33	52.8	3e-181	7218933	BRAFLDRAFT_114443	GO:0008469	histone-arginine N-methyltransferase activity	molecular_function	9
TRINITY_DN11759_c0_g1	UNIPROTKB|C3XU33	52.8	3e-181	7218933	BRAFLDRAFT_114443	GO:0019918	peptidyl-arginine methylation, to symmetrical-dimethyl arginine	biological_process	14
TRINITY_DN11763_c0_g1	UNIPROTKB|J9NYA9	50.9	1.7e-24	489691	SDR42E1	GO:0003854	3-beta-hydroxy-delta5-steroid dehydrogenase activity	molecular_function	7
TRINITY_DN11763_c0_g1	UNIPROTKB|J9NYA9	50.9	1.7e-24	489691	SDR42E1	GO:0006694	steroid biosynthetic process	biological_process	7
TRINITY_DN11763_c0_g1	UNIPROTKB|J9NYA9	50.9	1.7e-24	489691	SDR42E1	GO:0016021	integral component of membrane	cellular_component	5
TRINITY_DN11763_c0_g1	UNIPROTKB|J9NYA9	50.9	1.7e-24	489691	SDR42E1	GO:0055114	oxidation-reduction process	biological_process	4
TRINITY_DN11765_c0_g2	UNIPROTKB|Q51561	84.6	8.3e-41	881699	rpoB	GO:0000428	DNA-directed RNA polymerase complex	cellular_component	6
TRINITY_DN11765_c0_g2	UNIPROTKB|Q51561	84.6	8.3e-41	881699	rpoB	GO:0003899	DNA-directed 5'-3' RNA polymerase activity	molecular_function	9
TRINITY_DN11769_c1_g2	UNIPROTKB|Q2F990	92.1	1.5e-85	3950739	nad7	GO:0005739	mitochondrion	cellular_component	6
TRINITY_DN11772_c0_g2	UNIPROTKB|Q4KC71	43.3	6.8e-59	29823250	PFL_3056	GO:0016813	hydrolase activity, acting on carbon-nitrogen (but not peptide) bonds, in linear amidines	molecular_function	6
TRINITY_DN11782_c0_g1	UNIPROTKB|I3L5S6	45.3	4.5e-10	-	I3L5S6	GO:0005044	scavenger receptor activity	molecular_function	4
TRINITY_DN11782_c0_g1	UNIPROTKB|I3L5S6	45.3	4.5e-10	-	I3L5S6	GO:0006898	receptor-mediated endocytosis	biological_process	8
TRINITY_DN11782_c0_g1	UNIPROTKB|I3L5S6	45.3	4.5e-10	-	I3L5S6	GO:0016021	integral component of membrane	cellular_component	5
TRINITY_DN1178_c0_g1	ZFIN|ZDB-GENE-040718-186	54.3	6.2e-30	436756	sox1a	GO:0003677	DNA binding	molecular_function	6
TRINITY_DN1178_c0_g1	ZFIN|ZDB-GENE-040718-186	54.3	6.2e-30	436756	sox1a	GO:0003700	DNA binding transcription factor activity	molecular_function	4
TRINITY_DN1178_c0_g1	ZFIN|ZDB-GENE-040718-186	54.3	6.2e-30	436756	sox1a	GO:0005634	nucleus	cellular_component	6
TRINITY_DN1178_c0_g1	ZFIN|ZDB-GENE-040718-186	54.3	6.2e-30	436756	sox1a	GO:0005667	transcription factor complex	cellular_component	4
TRINITY_DN1178_c0_g1	ZFIN|ZDB-GENE-040718-186	54.3	6.2e-30	436756	sox1a	GO:0006351	transcription, DNA-templated	biological_process	8
TRINITY_DN1178_c0_g1	ZFIN|ZDB-GENE-040718-186	54.3	6.2e-30	436756	sox1a	GO:0006355	regulation of transcription, DNA-templated	biological_process	8
TRINITY_DN1178_c0_g1	ZFIN|ZDB-GENE-040718-186	54.3	6.2e-30	436756	sox1a	GO:0007275	multicellular organism development	biological_process	4
TRINITY_DN1178_c0_g1	ZFIN|ZDB-GENE-040718-186	54.3	6.2e-30	436756	sox1a	GO:0007399	nervous system development	biological_process	6
TRINITY_DN1178_c0_g1	ZFIN|ZDB-GENE-040718-186	54.3	6.2e-30	436756	sox1a	GO:0051091	positive regulation of DNA binding transcription factor activity	biological_process	6
TRINITY_DN11803_c0_g2	UNIPROTKB|C3Y431	73.4	7.1e-32	7234135	BRAFLDRAFT_114851	GO:0005783	endoplasmic reticulum	cellular_component	6
TRINITY_DN11803_c0_g2	UNIPROTKB|C3Y431	73.4	7.1e-32	7234135	BRAFLDRAFT_114851	GO:1990592	protein K69-linked ufmylation	biological_process	13
TRINITY_DN11810_c0_g1	UNIPROTKB|B3S2V7	61.8	1.4e-18	6755766	TRIADDRAFT_58497	GO:0003735	structural constituent of ribosome	molecular_function	4
TRINITY_DN11810_c0_g1	UNIPROTKB|B3S2V7	61.8	1.4e-18	6755766	TRIADDRAFT_58497	GO:0005763	mitochondrial small ribosomal subunit	cellular_component	9
TRINITY_DN11810_c0_g1	UNIPROTKB|B3S2V7	61.8	1.4e-18	6755766	TRIADDRAFT_58497	GO:0022627	cytosolic small ribosomal subunit	cellular_component	8
TRINITY_DN11810_c0_g1	UNIPROTKB|B3S2V7	61.8	1.4e-18	6755766	TRIADDRAFT_58497	GO:0032543	mitochondrial translation	biological_process	9
TRINITY_DN11812_c0_g1	UNIPROTKB|Q6DER9	83.3	4e-14	448672	rpl38	GO:0003723	RNA binding	molecular_function	6
TRINITY_DN11812_c0_g1	UNIPROTKB|Q6DER9	83.3	4e-14	448672	rpl38	GO:0003735	structural constituent of ribosome	molecular_function	4
TRINITY_DN11812_c0_g1	UNIPROTKB|Q6DER9	83.3	4e-14	448672	rpl38	GO:0006412	translation	biological_process	8
TRINITY_DN11812_c0_g1	UNIPROTKB|Q6DER9	83.3	4e-14	448672	rpl38	GO:0022618	ribonucleoprotein complex assembly	biological_process	8
TRINITY_DN11812_c0_g1	UNIPROTKB|Q6DER9	83.3	4e-14	448672	rpl38	GO:0022625	cytosolic large ribosomal subunit	cellular_component	8
TRINITY_DN11819_c0_g2	ZFIN|ZDB-GENE-040718-271	45	7.5e-10	436809	fam204a	GO:0003674	molecular_function	molecular_function	2
TRINITY_DN11819_c0_g2	ZFIN|ZDB-GENE-040718-271	45	7.5e-10	436809	fam204a	GO:0005575	cellular_component	cellular_component	2
TRINITY_DN11819_c0_g2	ZFIN|ZDB-GENE-040718-271	45	7.5e-10	436809	fam204a	GO:0008150	biological_process	biological_process	2
TRINITY_DN11825_c0_g1	TAIR|locus:3439219	97.3	4.2e-35	827154	TUA6	GO:0000226	microtubule cytoskeleton organization	biological_process	7
TRINITY_DN11825_c0_g1	TAIR|locus:3439219	97.3	4.2e-35	827154	TUA6	GO:0003924	GTPase activity	molecular_function	9
TRINITY_DN11825_c0_g1	TAIR|locus:3439219	97.3	4.2e-35	827154	TUA6	GO:0005200	structural constituent of cytoskeleton	molecular_function	4
TRINITY_DN11825_c0_g1	TAIR|locus:3439219	97.3	4.2e-35	827154	TUA6	GO:0005515	protein binding	molecular_function	4
TRINITY_DN11825_c0_g1	TAIR|locus:3439219	97.3	4.2e-35	827154	TUA6	GO:0005525	GTP binding	molecular_function	8
TRINITY_DN11825_c0_g1	TAIR|locus:3439219	97.3	4.2e-35	827154	TUA6	GO:0005618	cell wall	cellular_component	5
TRINITY_DN11825_c0_g1	TAIR|locus:3439219	97.3	4.2e-35	827154	TUA6	GO:0005730	nucleolus	cellular_component	6
TRINITY_DN11825_c0_g1	TAIR|locus:3439219	97.3	4.2e-35	827154	TUA6	GO:0005737	cytoplasm	cellular_component	5
TRINITY_DN11825_c0_g1	TAIR|locus:3439219	97.3	4.2e-35	827154	TUA6	GO:0005773	vacuole	cellular_component	6
TRINITY_DN11825_c0_g1	TAIR|locus:3439219	97.3	4.2e-35	827154	TUA6	GO:0005829	cytosol	cellular_component	6
TRINITY_DN11825_c0_g1	TAIR|locus:3439219	97.3	4.2e-35	827154	TUA6	GO:0005874	microtubule	cellular_component	7
TRINITY_DN11825_c0_g1	TAIR|locus:3439219	97.3	4.2e-35	827154	TUA6	GO:0005886	plasma membrane	cellular_component	4
TRINITY_DN11825_c0_g1	TAIR|locus:3439219	97.3	4.2e-35	827154	TUA6	GO:0007017	microtubule-based process	biological_process	4
TRINITY_DN11825_c0_g1	TAIR|locus:3439219	97.3	4.2e-35	827154	TUA6	GO:0009506	plasmodesma	cellular_component	5
TRINITY_DN11825_c0_g1	TAIR|locus:3439219	97.3	4.2e-35	827154	TUA6	GO:0009651	response to salt stress	biological_process	6
TRINITY_DN11825_c0_g1	TAIR|locus:3439219	97.3	4.2e-35	827154	TUA6	GO:0016020	membrane	cellular_component	3
TRINITY_DN11825_c0_g1	TAIR|locus:3439219	97.3	4.2e-35	827154	TUA6	GO:0045298	tubulin complex	cellular_component	4
TRINITY_DN11825_c0_g1	TAIR|locus:3439219	97.3	4.2e-35	827154	TUA6	GO:0071258	cellular response to gravity	biological_process	6
TRINITY_DN11832_c0_g1	UNIPROTKB|W4XN31	37.8	3e-06	-	Sp-PolppL_39	GO:0004536	deoxyribonuclease activity	molecular_function	7
TRINITY_DN11832_c0_g1	UNIPROTKB|W4XN31	37.8	3e-06	-	Sp-PolppL_39	GO:0006308	DNA catabolic process	biological_process	8
TRINITY_DN11833_c0_g1	UNIPROTKB|Q9UG56	33.2	2.1e-42	23761	PISD	GO:0004609	phosphatidylserine decarboxylase activity	molecular_function	7
TRINITY_DN11833_c0_g1	UNIPROTKB|Q9UG56	33.2	2.1e-42	23761	PISD	GO:0005634	nucleus	cellular_component	6
TRINITY_DN11833_c0_g1	UNIPROTKB|Q9UG56	33.2	2.1e-42	23761	PISD	GO:0005743	mitochondrial inner membrane	cellular_component	6
TRINITY_DN11833_c0_g1	UNIPROTKB|Q9UG56	33.2	2.1e-42	23761	PISD	GO:0008654	phospholipid biosynthetic process	biological_process	8
TRINITY_DN11833_c0_g1	UNIPROTKB|Q9UG56	33.2	2.1e-42	23761	PISD	GO:0016021	integral component of membrane	cellular_component	5
TRINITY_DN11840_c1_g1	UNIPROTKB|B3RV97	70.3	8.8e-62	6752710	TRIADDRAFT_55577	GO:0000209	protein polyubiquitination	biological_process	12
TRINITY_DN11840_c1_g1	UNIPROTKB|B3RV97	70.3	8.8e-62	6752710	TRIADDRAFT_55577	GO:0005634	nucleus	cellular_component	6
TRINITY_DN11840_c1_g1	UNIPROTKB|B3RV97	70.3	8.8e-62	6752710	TRIADDRAFT_55577	GO:0005737	cytoplasm	cellular_component	5
TRINITY_DN11840_c1_g1	UNIPROTKB|B3RV97	70.3	8.8e-62	6752710	TRIADDRAFT_55577	GO:0030071	regulation of mitotic metaphase/anaphase transition	biological_process	11
TRINITY_DN11840_c1_g1	UNIPROTKB|B3RV97	70.3	8.8e-62	6752710	TRIADDRAFT_55577	GO:0031145	anaphase-promoting complex-dependent catabolic process	biological_process	12
TRINITY_DN11840_c1_g1	UNIPROTKB|B3RV97	70.3	8.8e-62	6752710	TRIADDRAFT_55577	GO:0031625	ubiquitin protein ligase binding	molecular_function	7
TRINITY_DN11840_c1_g1	UNIPROTKB|B3RV97	70.3	8.8e-62	6752710	TRIADDRAFT_55577	GO:0061630	ubiquitin protein ligase activity	molecular_function	7
TRINITY_DN11843_c0_g1	TAIR|locus:2044856	90.7	2.3e-40	818220	FBA6	GO:0004332	fructose-bisphosphate aldolase activity	molecular_function	7
TRINITY_DN11843_c0_g1	TAIR|locus:2044856	90.7	2.3e-40	818220	FBA6	GO:0005507	copper ion binding	molecular_function	8
TRINITY_DN11843_c0_g1	TAIR|locus:2044856	90.7	2.3e-40	818220	FBA6	GO:0005515	protein binding	molecular_function	4
TRINITY_DN11843_c0_g1	TAIR|locus:2044856	90.7	2.3e-40	818220	FBA6	GO:0005634	nucleus	cellular_component	6
TRINITY_DN11843_c0_g1	TAIR|locus:2044856	90.7	2.3e-40	818220	FBA6	GO:0005737	cytoplasm	cellular_component	5
TRINITY_DN11843_c0_g1	TAIR|locus:2044856	90.7	2.3e-40	818220	FBA6	GO:0005739	mitochondrion	cellular_component	6
TRINITY_DN11843_c0_g1	TAIR|locus:2044856	90.7	2.3e-40	818220	FBA6	GO:0005829	cytosol	cellular_component	6
TRINITY_DN11843_c0_g1	TAIR|locus:2044856	90.7	2.3e-40	818220	FBA6	GO:0005886	plasma membrane	cellular_component	4
TRINITY_DN11843_c0_g1	TAIR|locus:2044856	90.7	2.3e-40	818220	FBA6	GO:0006094	gluconeogenesis	biological_process	9
TRINITY_DN11843_c0_g1	TAIR|locus:2044856	90.7	2.3e-40	818220	FBA6	GO:0006096	glycolytic process	biological_process	10
TRINITY_DN11843_c0_g1	TAIR|locus:2044856	90.7	2.3e-40	818220	FBA6	GO:0006098	pentose-phosphate shunt	biological_process	7
TRINITY_DN11843_c0_g1	TAIR|locus:2044856	90.7	2.3e-40	818220	FBA6	GO:0009506	plasmodesma	cellular_component	5
TRINITY_DN11843_c0_g1	TAIR|locus:2044856	90.7	2.3e-40	818220	FBA6	GO:0009651	response to salt stress	biological_process	6
TRINITY_DN11843_c0_g1	TAIR|locus:2044856	90.7	2.3e-40	818220	FBA6	GO:0009735	response to cytokinin	biological_process	6
TRINITY_DN11843_c0_g1	TAIR|locus:2044856	90.7	2.3e-40	818220	FBA6	GO:0016020	membrane	cellular_component	3
TRINITY_DN11843_c0_g1	TAIR|locus:2044856	90.7	2.3e-40	818220	FBA6	GO:0031930	mitochondria-nucleus signaling pathway	biological_process	5
TRINITY_DN11843_c0_g1	TAIR|locus:2044856	90.7	2.3e-40	818220	FBA6	GO:0046686	response to cadmium ion	biological_process	7
TRINITY_DN11843_c0_g2	TAIR|locus:2044856	91.2	2e-28	818220	FBA6	GO:0004332	fructose-bisphosphate aldolase activity	molecular_function	7
TRINITY_DN11843_c0_g2	TAIR|locus:2044856	91.2	2e-28	818220	FBA6	GO:0005507	copper ion binding	molecular_function	8
TRINITY_DN11843_c0_g2	TAIR|locus:2044856	91.2	2e-28	818220	FBA6	GO:0005515	protein binding	molecular_function	4
TRINITY_DN11843_c0_g2	TAIR|locus:2044856	91.2	2e-28	818220	FBA6	GO:0005634	nucleus	cellular_component	6
TRINITY_DN11843_c0_g2	TAIR|locus:2044856	91.2	2e-28	818220	FBA6	GO:0005737	cytoplasm	cellular_component	5
TRINITY_DN11843_c0_g2	TAIR|locus:2044856	91.2	2e-28	818220	FBA6	GO:0005739	mitochondrion	cellular_component	6
TRINITY_DN11843_c0_g2	TAIR|locus:2044856	91.2	2e-28	818220	FBA6	GO:0005829	cytosol	cellular_component	6
TRINITY_DN11843_c0_g2	TAIR|locus:2044856	91.2	2e-28	818220	FBA6	GO:0005886	plasma membrane	cellular_component	4
TRINITY_DN11843_c0_g2	TAIR|locus:2044856	91.2	2e-28	818220	FBA6	GO:0006094	gluconeogenesis	biological_process	9
TRINITY_DN11843_c0_g2	TAIR|locus:2044856	91.2	2e-28	818220	FBA6	GO:0006096	glycolytic process	biological_process	10
TRINITY_DN11843_c0_g2	TAIR|locus:2044856	91.2	2e-28	818220	FBA6	GO:0006098	pentose-phosphate shunt	biological_process	7
TRINITY_DN11843_c0_g2	TAIR|locus:2044856	91.2	2e-28	818220	FBA6	GO:0009506	plasmodesma	cellular_component	5
TRINITY_DN11843_c0_g2	TAIR|locus:2044856	91.2	2e-28	818220	FBA6	GO:0009651	response to salt stress	biological_process	6
TRINITY_DN11843_c0_g2	TAIR|locus:2044856	91.2	2e-28	818220	FBA6	GO:0009735	response to cytokinin	biological_process	6
TRINITY_DN11843_c0_g2	TAIR|locus:2044856	91.2	2e-28	818220	FBA6	GO:0016020	membrane	cellular_component	3
TRINITY_DN11843_c0_g2	TAIR|locus:2044856	91.2	2e-28	818220	FBA6	GO:0031930	mitochondria-nucleus signaling pathway	biological_process	5
TRINITY_DN11843_c0_g2	TAIR|locus:2044856	91.2	2e-28	818220	FBA6	GO:0046686	response to cadmium ion	biological_process	7
TRINITY_DN11853_c0_g1	UNIPROTKB|Q5XMJ0	37.3	4.7e-28	-	Q5XMJ0	GO:0019221	cytokine-mediated signaling pathway	biological_process	6
TRINITY_DN11853_c0_g1	UNIPROTKB|Q5XMJ0	37.3	4.7e-28	-	Q5XMJ0	GO:0042335	cuticle development	biological_process	5
TRINITY_DN11853_c0_g1	UNIPROTKB|Q5XMJ0	37.3	4.7e-28	-	Q5XMJ0	GO:0051591	response to cAMP	biological_process	8
TRINITY_DN11855_c0_g1	UNIPROTKB|B3RY41	63.4	1.2e-07	6754075	TRIADDRAFT_63946	GO:0000398	mRNA splicing, via spliceosome	biological_process	13
TRINITY_DN11855_c0_g1	UNIPROTKB|B3RY41	63.4	1.2e-07	6754075	TRIADDRAFT_63946	GO:0003723	RNA binding	molecular_function	6
TRINITY_DN11855_c0_g1	UNIPROTKB|B3RY41	63.4	1.2e-07	6754075	TRIADDRAFT_63946	GO:0005684	U2-type spliceosomal complex	cellular_component	7
TRINITY_DN11855_c0_g1	UNIPROTKB|B3RY41	63.4	1.2e-07	6754075	TRIADDRAFT_63946	GO:0005686	U2 snRNP	cellular_component	8
TRINITY_DN11855_c0_g2	UNIPROTKB|C3XS94	62.5	6.7e-16	7207617	BRAFLDRAFT_125707	GO:0000398	mRNA splicing, via spliceosome	biological_process	13
TRINITY_DN11855_c0_g2	UNIPROTKB|C3XS94	62.5	6.7e-16	7207617	BRAFLDRAFT_125707	GO:0003723	RNA binding	molecular_function	6
TRINITY_DN11855_c0_g2	UNIPROTKB|C3XS94	62.5	6.7e-16	7207617	BRAFLDRAFT_125707	GO:0005684	U2-type spliceosomal complex	cellular_component	7
TRINITY_DN11855_c0_g2	UNIPROTKB|C3XS94	62.5	6.7e-16	7207617	BRAFLDRAFT_125707	GO:0005686	U2 snRNP	cellular_component	8
TRINITY_DN11855_c0_g3	UNIPROTKB|Q5EAL1	53.3	4.8e-36	548402	htatsf1-prov	GO:0000398	mRNA splicing, via spliceosome	biological_process	13
TRINITY_DN11855_c0_g3	UNIPROTKB|Q5EAL1	53.3	4.8e-36	548402	htatsf1-prov	GO:0003723	RNA binding	molecular_function	6
TRINITY_DN11855_c0_g3	UNIPROTKB|Q5EAL1	53.3	4.8e-36	548402	htatsf1-prov	GO:0005684	U2-type spliceosomal complex	cellular_component	7
TRINITY_DN11855_c0_g3	UNIPROTKB|Q5EAL1	53.3	4.8e-36	548402	htatsf1-prov	GO:0005686	U2 snRNP	cellular_component	8
TRINITY_DN11875_c0_g1	MGI|MGI:3026886	51	1.4e-66	399568	BC052040	GO:0003674	molecular_function	molecular_function	2
TRINITY_DN11875_c0_g1	MGI|MGI:3026886	51	1.4e-66	399568	BC052040	GO:0005575	cellular_component	cellular_component	2
TRINITY_DN11875_c0_g1	MGI|MGI:3026886	51	1.4e-66	399568	BC052040	GO:0008150	biological_process	biological_process	2
[truncated: 57,939 more rows]
