# Supplementary material for: Freshwater sponge hosts and their green algae symbionts: a tractable model to understand intracellular symbiosis
Source: PeerJ. 2021 Feb 11;9:e10654. doi: 10.7717/peerj.10654 (PMC7882143; doi:10.7717/peerj.10654)
Supplement: Supplemental Information 15 [file peerj-09-10654-s015.xlsx]

## Sheet: Sheet1
Query	KEGG_hit	KEGG_identity	KEGG_evalue	GeneName	GeneDescription	KOEntry	KODescription	EC	PathwayEntry	PathwayDefinition	KEGGLevel1	KEGGLevel2
TRINITY_DN10001_c0_g1	zju:107423564	31.2	2.5e-29	NA	NA	NA	NA	NA	NA	NA	NA	NA
TRINITY_DN10007_c0_g1	aip:107644115	100	9.9e-38	-	glutamine synthetase nodule isozyme	K01915	glutamine synthetase	EC:6.3.1.2	aip00630	Glyoxylate and dicarboxylate metabolism	Metabolism	Carbohydrate metabolism
TRINITY_DN10007_c0_g1	aip:107644115	100	9.9e-38	-	glutamine synthetase nodule isozyme	K01915	glutamine synthetase	EC:6.3.1.2	aip00910	Nitrogen metabolism	Metabolism	Energy metabolism
TRINITY_DN10007_c0_g1	aip:107644115	100	9.9e-38	-	glutamine synthetase nodule isozyme	K01915	glutamine synthetase	EC:6.3.1.2	aip00250	Alanine, aspartate and glutamate metabolism	Metabolism	Amino acid metabolism
TRINITY_DN10007_c0_g1	aip:107644115	100	9.9e-38	-	glutamine synthetase nodule isozyme	K01915	glutamine synthetase	EC:6.3.1.2	aip00220	Arginine biosynthesis	Metabolism	Amino acid metabolism
TRINITY_DN10028_c0_g1	obr:102713873	67.8	1.2e-66	-	rac-like GTP-binding protein 7	K04392	Ras-related C3 botulinum toxin substrate 1	-	obr04145	Phagosome	Cellular Processes	Transport and catabolism
TRINITY_DN10028_c0_g1	obr:102713873	67.8	1.2e-66	-	rac-like GTP-binding protein 7	K04392	Ras-related C3 botulinum toxin substrate 1	-	obr04933	AGE-RAGE signaling pathway in diabetic complications	Human Diseases	Endocrine and metabolic diseases
TRINITY_DN10034_c0_g1	adu:107472101	100	1.7e-37	-	40S ribosomal protein SA isoform X1	K02998	small subunit ribosomal protein SAe	-	adu03010	Ribosome	Genetic Information Processing	Translation
TRINITY_DN10047_c0_g1	jcu:105630836	45.7	3.6e-23	-	NADH dehydrogenase [ubiquinone] iron-sulfur protein 4	K03937	NADH dehydrogenase (ubiquinone) Fe-S protein 4	-	jcu00190	Oxidative phosphorylation	Metabolism	Energy metabolism
TRINITY_DN10049_c0_g1	mcha:111011160	76.9	2.2e-274	NA	NA	NA	NA	NA	NA	NA	NA	NA
TRINITY_DN10051_c0_g1	csl:COCSUDRAFT_26964	85.4	1.4e-34	NA	NA	NA	NA	NA	NA	NA	NA	NA
TRINITY_DN10058_c0_g1	aly:ARALYDRAFT_676903	34.9	5.2e-80	-	hypothetical protein	K05929	phosphoethanolamine N-methyltransferase	EC:2.1.1.103	aly00564	Glycerophospholipid metabolism	Metabolism	Lipid metabolism
TRINITY_DN10081_c0_g2	han:110930590	63	3.7e-22	NA	NA	NA	NA	NA	NA	NA	NA	NA
TRINITY_DN10109_c0_g1	gsl:Gasu_17300	47	6.5e-51	-	maleylacetoacetate isomerase	K01800	maleylacetoacetate isomerase	EC:5.2.1.2	gsl00350	Tyrosine metabolism	Metabolism	Amino acid metabolism
TRINITY_DN10122_c0_g1	gsl:Gasu_29450	49.4	1.8e-33	-	RNA-binding protein	K14396	polyadenylate-binding protein 2	-	gsl03015	mRNA surveillance pathway	Genetic Information Processing	Translation
TRINITY_DN10136_c0_g1	zju:107427609	56.4	3.3e-79	NA	NA	NA	NA	NA	NA	NA	NA	NA
TRINITY_DN10141_c0_g1	apro:F751_1060	62.1	1.2e-51	-	Nucleoside diphosphate kinase	K00940	nucleoside-diphosphate kinase	EC:2.7.4.6	apro00230	Purine metabolism	Metabolism	Nucleotide metabolism
TRINITY_DN10141_c0_g1	apro:F751_1060	62.1	1.2e-51	-	Nucleoside diphosphate kinase	K00940	nucleoside-diphosphate kinase	EC:2.7.4.6	apro00240	Pyrimidine metabolism	Metabolism	Nucleotide metabolism
TRINITY_DN10141_c0_g1	apro:F751_1060	62.1	1.2e-51	-	Nucleoside diphosphate kinase	K00940	nucleoside-diphosphate kinase	EC:2.7.4.6	apro04016	MAPK signaling pathway - plant	Environmental Information Processing	Signal transduction
TRINITY_DN10144_c0_g1	cvr:OJ20_p23	63.4	1.7e-64	nad9	NADH dehydrogenase subunit 9	K03936	NADH dehydrogenase (ubiquinone) Fe-S protein 3	EC:1.6.5.3 1.6.99.3	cvr00190	Oxidative phosphorylation	Metabolism	Energy metabolism
TRINITY_DN10145_c0_g1	eus:EUTSA_v10000143mg	28.9	2.4e-39	NA	NA	NA	NA	NA	NA	NA	NA	NA
TRINITY_DN10188_c0_g1	bvg:104904015	59.3	7.6e-24	-	serine/arginine-rich splicing factor SC35	K12891	splicing factor, arginine/serine-rich 2	-	bvg03040	Spliceosome	Genetic Information Processing	Transcription
TRINITY_DN10200_c0_g1	eus:EUTSA_v10010760mg	41.2	1.7e-24	NA	NA	NA	NA	NA	NA	NA	NA	NA
TRINITY_DN10201_c0_g1	cme:CYME_CMF062C	26.3	4.5e-17	NA	NA	NA	NA	NA	NA	NA	NA	NA
TRINITY_DN10201_c0_g2	cme:CYME_CMT508C	51.2	9.9e-28	-	mitochondrial ribosomal protein L17 precursor	K02879	large subunit ribosomal protein L17	-	cme03010	Ribosome	Genetic Information Processing	Translation
TRINITY_DN10204_c0_g1	egr:104424450	61.7	2.1e-67	NA	NA	NA	NA	NA	NA	NA	NA	NA
TRINITY_DN10209_c0_g1	smo:SELMODRAFT_144252	45	1e-42	-	hypothetical protein	K00799	glutathione S-transferase	EC:2.5.1.18	smo00480	Glutathione metabolism	Metabolism	Metabolism of other amino acids
TRINITY_DN10275_c0_g1	csl:CospCoM_p26	64.5	2.7e-182	cox1	cytochrome c oxidase subunit 1	K02256	cytochrome c oxidase subunit 1	EC:1.9.3.1	csl00190	Oxidative phosphorylation	Metabolism	Energy metabolism
TRINITY_DN10275_c1_g1	csl:CospCoM_p26	73.6	1.1e-51	cox1	cytochrome c oxidase subunit 1	K02256	cytochrome c oxidase subunit 1	EC:1.9.3.1	csl00190	Oxidative phosphorylation	Metabolism	Energy metabolism
TRINITY_DN10289_c0_g1	ini:109160095	42.1	2.2e-44	PnDET2	steroid 5-alpha-reductase DET2	K09591	steroid 5-alpha-reductase	EC:1.3.1.22	ini00905	Brassinosteroid biosynthesis	Metabolism	Metabolism of terpenoids and polyketides
TRINITY_DN10341_c0_g4	dct:110104222	53.5	2.1e-13	-	probable signal peptidase complex subunit 1	K12946	signal peptidase complex subunit 1	EC:3.4.-.-	dct03060	Protein export	Genetic Information Processing	Folding, sorting and degradation
TRINITY_DN10369_c0_g1	olu:OSTLU_3057	47.5	1.5e-12	NA	NA	NA	NA	NA	NA	NA	NA	NA
TRINITY_DN10371_c0_g1	atr:18425936	73.6	1.7e-191	NA	NA	NA	NA	NA	NA	NA	NA	NA
TRINITY_DN10380_c0_g1	ats:109779236	47.5	6.8e-36	NA	NA	NA	NA	NA	NA	NA	NA	NA
TRINITY_DN10396_c0_g4	gsl:Gasu_58020	60.5	1.2e-13	NA	NA	NA	NA	NA	NA	NA	NA	NA
TRINITY_DN10398_c0_g1	aip:107607605	60	1.3e-15	-	endochitinase-like	K20547	basic endochitinase B	EC:3.2.1.14	aip00520	Amino sugar and nucleotide sugar metabolism	Metabolism	Carbohydrate metabolism
TRINITY_DN10398_c0_g1	aip:107607605	60	1.3e-15	-	endochitinase-like	K20547	basic endochitinase B	EC:3.2.1.14	aip04016	MAPK signaling pathway - plant	Environmental Information Processing	Signal transduction
TRINITY_DN10413_c0_g1	gsl:Gasu_43360	35.2	2.3e-96	NA	NA	NA	NA	NA	NA	NA	NA	NA
TRINITY_DN10420_c0_g1	adu:107458779	100	3.4e-42	NA	NA	NA	NA	NA	NA	NA	NA	NA
TRINITY_DN10475_c0_g1	adu:107494407	100	3e-28	-	5-methyltetrahydropteroyltriglutamate-- homocysteine methyltransferase 1	K00549	5-methyltetrahydropteroyltriglutamate--homocysteine methyltransferase	EC:2.1.1.14	adu00270	Cysteine and methionine metabolism	Metabolism	Amino acid metabolism
TRINITY_DN10475_c0_g1	adu:107494407	100	3e-28	-	5-methyltetrahydropteroyltriglutamate-- homocysteine methyltransferase 1	K00549	5-methyltetrahydropteroyltriglutamate--homocysteine methyltransferase	EC:2.1.1.14	adu00450	Selenocompound metabolism	Metabolism	Metabolism of other amino acids
TRINITY_DN10475_c0_g4	adu:107494407	100	9.1e-36	-	5-methyltetrahydropteroyltriglutamate-- homocysteine methyltransferase 1	K00549	5-methyltetrahydropteroyltriglutamate--homocysteine methyltransferase	EC:2.1.1.14	adu00270	Cysteine and methionine metabolism	Metabolism	Amino acid metabolism
TRINITY_DN10475_c0_g4	adu:107494407	100	9.1e-36	-	5-methyltetrahydropteroyltriglutamate-- homocysteine methyltransferase 1	K00549	5-methyltetrahydropteroyltriglutamate--homocysteine methyltransferase	EC:2.1.1.14	adu00450	Selenocompound metabolism	Metabolism	Metabolism of other amino acids
TRINITY_DN10493_c0_g1	mis:MICPUN_58233	31.5	3.3e-40	NA	NA	NA	NA	NA	NA	NA	NA	NA
TRINITY_DN10512_c0_g1	gsl:Gasu_18680	75.4	4.3e-52	-	40S ribosomal protein S15A	K02957	small subunit ribosomal protein S15Ae	-	gsl03010	Ribosome	Genetic Information Processing	Translation
TRINITY_DN10519_c0_g1	mng:MNEG_4129	60.9	1.3e-14	-	60S acidic ribosomal protein P1	K02942	large subunit ribosomal protein LP1	-	mng03010	Ribosome	Genetic Information Processing	Translation
TRINITY_DN10522_c0_g1	gra:105778930	30.6	1.5e-15	-	probable 3-hydroxyacyl-CoA dehydrogenase B0272.3	K00074	3-hydroxybutyryl-CoA dehydrogenase	EC:1.1.1.157	gra00650	Butanoate metabolism	Metabolism	Carbohydrate metabolism
TRINITY_DN10522_c0_g1	gra:105778930	30.6	1.5e-15	-	probable 3-hydroxyacyl-CoA dehydrogenase B0272.3	K00074	3-hydroxybutyryl-CoA dehydrogenase	EC:1.1.1.157	gra00360	Phenylalanine metabolism	Metabolism	Amino acid metabolism
TRINITY_DN10524_c0_g2	mng:MNEG_8568	36.6	9.1e-22	NA	NA	NA	NA	NA	NA	NA	NA	NA
TRINITY_DN10524_c0_g3	gsl:Gasu_19250	27	9.3e-21	NA	NA	NA	NA	NA	NA	NA	NA	NA
TRINITY_DN10579_c0_g1	gsl:Gasu_21710	34.7	1.2e-24	-	D-arabinono-1	K00103	L-gulonolactone oxidase	EC:1.1.3.8	gsl00053	Ascorbate and aldarate metabolism	Metabolism	Carbohydrate metabolism
TRINITY_DN10583_c0_g1	smo:SELMODRAFT_141141	49.7	1.6e-49	-	hypothetical protein	K13288	oligoribonuclease	EC:3.1.-.-	smo03008	Ribosome biogenesis in eukaryotes	Genetic Information Processing	Translation
TRINITY_DN10586_c0_g1	mng:MNEG_11207	68.2	7e-69	NA	NA	NA	NA	NA	NA	NA	NA	NA
TRINITY_DN10609_c0_g1	egu:105044406	47.1	7.4e-27	-	uncharacterized protein LOC105044406	K02996	small subunit ribosomal protein S9	-	egu03010	Ribosome	Genetic Information Processing	Translation
TRINITY_DN10620_c0_g1	adu:107477745	100	4.8e-111	-	isocitrate lyase 1	K01637	isocitrate lyase	EC:4.1.3.1	adu00630	Glyoxylate and dicarboxylate metabolism	Metabolism	Carbohydrate metabolism
TRINITY_DN10623_c0_g1	smo:SELMODRAFT_77814	47.1	2.3e-57	NA	NA	NA	NA	NA	NA	NA	NA	NA
TRINITY_DN10646_c0_g1	nnu:104590591	47.6	4.2e-28	-	NADH dehydrogenase [ubiquinone] 1 alpha subcomplex subunit 13-B	K11353	NADH dehydrogenase (ubiquinone) 1 alpha subcomplex subunit 13	-	nnu00190	Oxidative phosphorylation	Metabolism	Energy metabolism
TRINITY_DN10656_c0_g1	gsl:Gasu_12160	71.8	5.6e-115	-	pyridoxine biosynthesis protein	K06215	pyridoxal 5'-phosphate synthase pdxS subunit	EC:4.3.3.6	gsl00750	Vitamin B6 metabolism	Metabolism	Metabolism of cofactors and vitamins
TRINITY_DN10658_c0_g1	hbr:110672370	63.8	4.2e-87	-	60S ribosomal protein L7a-1-like	K02936	large subunit ribosomal protein L7Ae	-	hbr03010	Ribosome	Genetic Information Processing	Translation
TRINITY_DN10669_c0_g1	eus:EUTSA_v10012616mg	24.6	3.2e-20	-	hypothetical protein	K01187	alpha-glucosidase	EC:3.2.1.20	eus00052	Galactose metabolism	Metabolism	Carbohydrate metabolism
TRINITY_DN10669_c0_g1	eus:EUTSA_v10012616mg	24.6	3.2e-20	-	hypothetical protein	K01187	alpha-glucosidase	EC:3.2.1.20	eus00500	Starch and sucrose metabolism	Metabolism	Carbohydrate metabolism
TRINITY_DN10671_c0_g1	ath:AT5G03860	100	3.8e-37	MLS	malate synthase	K01638	malate synthase	EC:2.3.3.9	ath00620	Pyruvate metabolism	Metabolism	Carbohydrate metabolism
TRINITY_DN10671_c0_g1	ath:AT5G03860	100	3.8e-37	MLS	malate synthase	K01638	malate synthase	EC:2.3.3.9	ath00630	Glyoxylate and dicarboxylate metabolism	Metabolism	Carbohydrate metabolism
TRINITY_DN10671_c0_g2	adu:107489605	100	3.6e-90	-	malate synthase	K01638	malate synthase	EC:2.3.3.9	adu00620	Pyruvate metabolism	Metabolism	Carbohydrate metabolism
TRINITY_DN10671_c0_g2	adu:107489605	100	3.6e-90	-	malate synthase	K01638	malate synthase	EC:2.3.3.9	adu00630	Glyoxylate and dicarboxylate metabolism	Metabolism	Carbohydrate metabolism
TRINITY_DN10672_c0_g1	mdm:103421173	55.2	1.4e-10	-	serine/arginine-rich splicing factor RSZ22A-like	K12896	splicing factor, arginine/serine-rich 7	-	mdm03040	Spliceosome	Genetic Information Processing	Transcription
TRINITY_DN10674_c0_g1	csl:COCSUDRAFT_63003	55.5	4.3e-134	NA	NA	NA	NA	NA	NA	NA	NA	NA
TRINITY_DN10697_c0_g2	adu:107493803	100	2.3e-29	-	enolase 2	K01689	enolase	EC:4.2.1.11	adu00010	Glycolysis / Gluconeogenesis	Metabolism	Carbohydrate metabolism
TRINITY_DN10697_c0_g2	adu:107493803	100	2.3e-29	-	enolase 2	K01689	enolase	EC:4.2.1.11	adu03018	RNA degradation	Genetic Information Processing	Folding, sorting and degradation
TRINITY_DN10711_c0_g1	thj:104823256	98.5	2.5e-32	-	probable mediator of RNA polymerase II transcription subunit 37e	K03283	heat shock 70kDa protein 1/2/6/8	-	thj03040	Spliceosome	Genetic Information Processing	Transcription
TRINITY_DN10711_c0_g1	thj:104823256	98.5	2.5e-32	-	probable mediator of RNA polymerase II transcription subunit 37e	K03283	heat shock 70kDa protein 1/2/6/8	-	thj04141	Protein processing in endoplasmic reticulum	Genetic Information Processing	Folding, sorting and degradation
TRINITY_DN10711_c0_g1	thj:104823256	98.5	2.5e-32	-	probable mediator of RNA polymerase II transcription subunit 37e	K03283	heat shock 70kDa protein 1/2/6/8	-	thj04144	Endocytosis	Cellular Processes	Transport and catabolism
TRINITY_DN10711_c0_g3	cpap:110824174	100	1.8e-30	-	heat shock cognate 70 kDa protein 2	K03283	heat shock 70kDa protein 1/2/6/8	-	cpap03040	Spliceosome	Genetic Information Processing	Transcription
TRINITY_DN10711_c0_g3	cpap:110824174	100	1.8e-30	-	heat shock cognate 70 kDa protein 2	K03283	heat shock 70kDa protein 1/2/6/8	-	cpap04141	Protein processing in endoplasmic reticulum	Genetic Information Processing	Folding, sorting and degradation
TRINITY_DN10711_c0_g3	cpap:110824174	100	1.8e-30	-	heat shock cognate 70 kDa protein 2	K03283	heat shock 70kDa protein 1/2/6/8	-	cpap04144	Endocytosis	Cellular Processes	Transport and catabolism
TRINITY_DN10718_c0_g1	mcha:111020524	62.8	2.3e-140	-	crooked neck-like protein 1	K12869	crooked neck	-	mcha03040	Spliceosome	Genetic Information Processing	Transcription
TRINITY_DN10724_c0_g2	mng:MNEG_7244	53.8	2.7e-29	NA	NA	NA	NA	NA	NA	NA	NA	NA
TRINITY_DN10726_c0_g1	apro:F751_0691	28	1.7e-19	NA	NA	NA	NA	NA	NA	NA	NA	NA
TRINITY_DN10729_c0_g1	fve:101293321	24.2	8.7e-22	-	lipid phosphate phosphatase delta	K04716	sphingosine-1-phosphate phosphatase 1	EC:3.1.3.-	fve00600	Sphingolipid metabolism	Metabolism	Lipid metabolism
TRINITY_DN1073_c0_g1	ghi:107950419	27.4	3.4e-17	NA	NA	NA	NA	NA	NA	NA	NA	NA
TRINITY_DN10759_c0_g2	han:110884090	84.8	5.3e-41	NA	NA	NA	NA	NA	NA	NA	NA	NA
TRINITY_DN10762_c0_g1	fve:101292437	32.4	1.2e-25	NA	NA	NA	NA	NA	NA	NA	NA	NA
TRINITY_DN10768_c0_g1	sita:101768392	43.6	1.5e-68	NA	NA	NA	NA	NA	NA	NA	NA	NA
TRINITY_DN10795_c0_g1	csl:COCSUDRAFT_22211	34.8	2e-06	-	WD40 repeat-like protein	K14004	protein transport protein SEC13	-	csl03013	RNA transport	Genetic Information Processing	Translation
TRINITY_DN10795_c0_g1	csl:COCSUDRAFT_22211	34.8	2e-06	-	WD40 repeat-like protein	K14004	protein transport protein SEC13	-	csl04141	Protein processing in endoplasmic reticulum	Genetic Information Processing	Folding, sorting and degradation
TRINITY_DN10804_c0_g1	lang:109334160	36.9	5.9e-64	-	THO complex subunit 1	K12878	THO complex subunit 1	-	lang03040	Spliceosome	Genetic Information Processing	Transcription
TRINITY_DN10804_c0_g1	lang:109334160	36.9	5.9e-64	-	THO complex subunit 1	K12878	THO complex subunit 1	-	lang03013	RNA transport	Genetic Information Processing	Translation
TRINITY_DN10810_c0_g1	smo:SELMODRAFT_149526	29	9.4e-08	-	hypothetical protein	K01069	hydroxyacylglutathione hydrolase	EC:3.1.2.6	smo00620	Pyruvate metabolism	Metabolism	Carbohydrate metabolism
TRINITY_DN10833_c0_g1	gsl:Gasu_49690	76.2	1.6e-35	-	60S ribosomal protein L44e	K02929	large subunit ribosomal protein L44e	-	gsl03010	Ribosome	Genetic Information Processing	Translation
TRINITY_DN10852_c0_g3	gsl:Gasu_47570	41.2	1.5e-21	-	F-type H+-transporting ATPase subunit delta	K02134	F-type H+-transporting ATPase subunit delta	-	gsl00190	Oxidative phosphorylation	Metabolism	Energy metabolism
TRINITY_DN10859_c0_g1	gsl:Gasu_32910	49.3	1.4e-09	NA	NA	NA	NA	NA	NA	NA	NA	NA
TRINITY_DN10864_c0_g1	egr:104440661	36	1.9e-29	NA	NA	NA	NA	NA	NA	NA	NA	NA
TRINITY_DN10868_c0_g1	cvr:CHLNCDRAFT_59721	95.3	1.6e-39	-	hypothetical protein	K02981	small subunit ribosomal protein S2e	-	cvr03010	Ribosome	Genetic Information Processing	Translation
TRINITY_DN10884_c0_g1	olu:OSTLU_26071	37	5.6e-53	-	predicted protein	K12603	CCR4-NOT transcription complex subunit 6	EC:3.1.13.4	olu03018	RNA degradation	Genetic Information Processing	Folding, sorting and degradation
TRINITY_DN10912_c0_g3	eus:EUTSA_v10023612mg	37.5	5.8e-23	NA	NA	NA	NA	NA	NA	NA	NA	NA
TRINITY_DN10921_c0_g1	bdi:100827991	61.3	1.2e-59	-	ubiquitin-conjugating enzyme E2 22	K10583	ubiquitin-conjugating enzyme E2 S	EC:2.3.2.23	bdi04120	Ubiquitin mediated proteolysis	Genetic Information Processing	Folding, sorting and degradation
TRINITY_DN10961_c0_g1	vcn:VOLCADRAFT_109535	61.3	4.3e-28	NA	NA	NA	NA	NA	NA	NA	NA	NA
TRINITY_DN10972_c0_g1	ccp:CHC_T00008872001	50.5	3.4e-18	NA	NA	NA	NA	NA	NA	NA	NA	NA
TRINITY_DN10975_c1_g1	sly:101247934	62.8	6.5e-96	NA	NA	NA	NA	NA	NA	NA	NA	NA
TRINITY_DN10977_c0_g1	adu:107467373	100	2.2e-44	-	ATP synthase subunit beta	K02133	F-type H+-transporting ATPase subunit beta	EC:3.6.3.14	adu00190	Oxidative phosphorylation	Metabolism	Energy metabolism
TRINITY_DN1097_c0_g1	vcn:VOLCADRAFT_106093	28.5	9.7e-20	NA	NA	NA	NA	NA	NA	NA	NA	NA
TRINITY_DN10982_c0_g1	adu:107488645	99	2.6e-52	-	thiamine thiazole synthase 2	K03146	cysteine-dependent adenosine diphosphate thiazole synthase	EC:2.4.2.60	adu00730	Thiamine metabolism	Metabolism	Metabolism of cofactors and vitamins
TRINITY_DN10987_c0_g1	smo:SELMODRAFT_440805	78.1	4e-64	-	hypothetical protein	K02953	small subunit ribosomal protein S13e	-	smo03010	Ribosome	Genetic Information Processing	Translation
TRINITY_DN11019_c0_g1	lang:109341960	96.3	1.3e-65	NA	NA	NA	NA	NA	NA	NA	NA	NA
TRINITY_DN11026_c0_g1	cit:102627788	52.8	6.5e-46	-	ADP-ribosylation factor 1	K07937	ADP-ribosylation factor 1	-	cit04144	Endocytosis	Cellular Processes	Transport and catabolism
TRINITY_DN11059_c0_g1	adu:107463291	100	4e-31	-	GTP-binding nuclear protein Ran-3	K07936	GTP-binding nuclear protein Ran	-	adu03013	RNA transport	Genetic Information Processing	Translation
TRINITY_DN11059_c0_g1	adu:107463291	100	4e-31	-	GTP-binding nuclear protein Ran-3	K07936	GTP-binding nuclear protein Ran	-	adu03008	Ribosome biogenesis in eukaryotes	Genetic Information Processing	Translation
TRINITY_DN1105_c0_g2	csv:101212793	53.8	3.2e-25	-	ADP-ribosylation factor 1	K07937	ADP-ribosylation factor 1	-	csv04144	Endocytosis	Cellular Processes	Transport and catabolism
TRINITY_DN11101_c0_g1	smo:SELMODRAFT_121528	50	5.1e-42	NA	NA	NA	NA	NA	NA	NA	NA	NA
TRINITY_DN11112_c0_g1	adu:107492262	100	1.6e-37	NA	NA	NA	NA	NA	NA	NA	NA	NA
TRINITY_DN11114_c0_g2	cmo:103496637	47.5	2.8e-07	NA	NA	NA	NA	NA	NA	NA	NA	NA
TRINITY_DN11114_c0_g3	brp:103835229	58	1.7e-21	NA	NA	NA	NA	NA	NA	NA	NA	NA
TRINITY_DN11161_c0_g1	cre:CHLREDRAFT_158173	36.2	1.3e-28	NA	NA	NA	NA	NA	NA	NA	NA	NA
TRINITY_DN11164_c0_g3	adu:107488247	75	4.6e-87	-	60S ribosomal protein L15-1	K02877	large subunit ribosomal protein L15e	-	adu03010	Ribosome	Genetic Information Processing	Translation
TRINITY_DN11169_c0_g1	pvu:PHAVU_001G1051001	45.6	1.2e-13	-	hypothetical protein	K00962	polyribonucleotide nucleotidyltransferase	EC:2.7.7.8	pvu00230	Purine metabolism	Metabolism	Nucleotide metabolism
TRINITY_DN11169_c0_g1	pvu:PHAVU_001G1051001	45.6	1.2e-13	-	hypothetical protein	K00962	polyribonucleotide nucleotidyltransferase	EC:2.7.7.8	pvu00240	Pyrimidine metabolism	Metabolism	Nucleotide metabolism
TRINITY_DN11169_c0_g1	pvu:PHAVU_001G1051001	45.6	1.2e-13	-	hypothetical protein	K00962	polyribonucleotide nucleotidyltransferase	EC:2.7.7.8	pvu03018	RNA degradation	Genetic Information Processing	Folding, sorting and degradation
TRINITY_DN11171_c0_g1	mcha:111014839	48.7	1.1e-12	-	dolichol-phosphate mannose synthase subunit 2	K09658	dolichyl-phosphate mannosyltransferase polypeptide 2, regulatory subunit	-	mcha00510	N-Glycan biosynthesis	Metabolism	Glycan biosynthesis and metabolism
TRINITY_DN11171_c0_g1	mcha:111014839	48.7	1.1e-12	-	dolichol-phosphate mannose synthase subunit 2	K09658	dolichyl-phosphate mannosyltransferase polypeptide 2, regulatory subunit	-	mcha00563	Glycosylphosphatidylinositol(GPI)-anchor biosynthesis	Metabolism	Glycan biosynthesis and metabolism
TRINITY_DN11206_c0_g1	csv:101217209	28.4	1e-40	-	L-ascorbate oxidase-like	K00423	L-ascorbate oxidase	EC:1.10.3.3	csv00053	Ascorbate and aldarate metabolism	Metabolism	Carbohydrate metabolism
TRINITY_DN11207_c0_g1	lang:109351511	60	4.9e-31	-	ras-related protein Rab7-like	K07897	Ras-related protein Rab-7A	-	lang04144	Endocytosis	Cellular Processes	Transport and catabolism
TRINITY_DN11207_c0_g1	lang:109351511	60	4.9e-31	-	ras-related protein Rab7-like	K07897	Ras-related protein Rab-7A	-	lang04145	Phagosome	Cellular Processes	Transport and catabolism
TRINITY_DN11251_c0_g1	cme:CYME_CMT559C	37.4	3e-29	NA	NA	NA	NA	NA	NA	NA	NA	NA
TRINITY_DN11283_c0_g1	fve:101313595	33.6	2.1e-08	NA	NA	NA	NA	NA	NA	NA	NA	NA
TRINITY_DN11307_c0_g2	soe:2715575	46.9	3.3e-13	atpA	ATP synthase CF1 alpha subunit	K02111	F-type H+-transporting ATPase subunit alpha	EC:3.6.3.14	soe00190	Oxidative phosphorylation	Metabolism	Energy metabolism
TRINITY_DN11307_c0_g2	soe:2715575	46.9	3.3e-13	atpA	ATP synthase CF1 alpha subunit	K02111	F-type H+-transporting ATPase subunit alpha	EC:3.6.3.14	soe00195	Photosynthesis	Metabolism	Energy metabolism
TRINITY_DN11309_c0_g1	adu:107483108	100	8.1e-54	-	60S ribosomal protein L9	K02940	large subunit ribosomal protein L9e	-	adu03010	Ribosome	Genetic Information Processing	Translation
TRINITY_DN11311_c0_g2	atr:110008293	35.6	2.4e-27	-	ultraviolet-B receptor UVR8-like	K10615	E3 ubiquitin-protein ligase HERC4	EC:2.3.2.26	atr04120	Ubiquitin mediated proteolysis	Genetic Information Processing	Folding, sorting and degradation
TRINITY_DN11311_c0_g5	atr:110008293	31.4	4.5e-11	-	ultraviolet-B receptor UVR8-like	K10615	E3 ubiquitin-protein ligase HERC4	EC:2.3.2.26	atr04120	Ubiquitin mediated proteolysis	Genetic Information Processing	Folding, sorting and degradation
TRINITY_DN11344_c0_g1	cme:CYME_CMP145C	51	1.9e-147	-	heat shock protein Hsp70	K03283	heat shock 70kDa protein 1/2/6/8	-	cme03040	Spliceosome	Genetic Information Processing	Transcription
TRINITY_DN11344_c0_g1	cme:CYME_CMP145C	51	1.9e-147	-	heat shock protein Hsp70	K03283	heat shock 70kDa protein 1/2/6/8	-	cme04141	Protein processing in endoplasmic reticulum	Genetic Information Processing	Folding, sorting and degradation
TRINITY_DN11344_c0_g1	cme:CYME_CMP145C	51	1.9e-147	-	heat shock protein Hsp70	K03283	heat shock 70kDa protein 1/2/6/8	-	cme04144	Endocytosis	Cellular Processes	Transport and catabolism
TRINITY_DN11353_c1_g1	ghi:107904577	92.9	2.7e-32	-	ubiquitin-conjugating enzyme E2 10-like	K06689	ubiquitin-conjugating enzyme E2 D	EC:2.3.2.23	ghi04141	Protein processing in endoplasmic reticulum	Genetic Information Processing	Folding, sorting and degradation
TRINITY_DN11353_c1_g1	ghi:107904577	92.9	2.7e-32	-	ubiquitin-conjugating enzyme E2 10-like	K06689	ubiquitin-conjugating enzyme E2 D	EC:2.3.2.23	ghi04120	Ubiquitin mediated proteolysis	Genetic Information Processing	Folding, sorting and degradation
TRINITY_DN11353_c1_g2	adu:107467877	100	2.6e-30	-	ubiquitin-conjugating enzyme E2-17 kDa	K06689	ubiquitin-conjugating enzyme E2 D	EC:2.3.2.23	adu04141	Protein processing in endoplasmic reticulum	Genetic Information Processing	Folding, sorting and degradation
TRINITY_DN11353_c1_g2	adu:107467877	100	2.6e-30	-	ubiquitin-conjugating enzyme E2-17 kDa	K06689	ubiquitin-conjugating enzyme E2 D	EC:2.3.2.23	adu04120	Ubiquitin mediated proteolysis	Genetic Information Processing	Folding, sorting and degradation
TRINITY_DN11354_c1_g1	mis:MICPUN_69617	30.1	1.1e-09	NA	NA	NA	NA	NA	NA	NA	NA	NA
TRINITY_DN11369_c0_g1	cann:107866468	34.2	1.4e-26	NA	NA	NA	NA	NA	NA	NA	NA	NA
TRINITY_DN11373_c0_g1	cvr:CHLNCDRAFT_133974	31.1	3e-08	NA	NA	NA	NA	NA	NA	NA	NA	NA
TRINITY_DN11379_c0_g1	jcu:105644591	37.1	3.5e-25	NA	NA	NA	NA	NA	NA	NA	NA	NA
TRINITY_DN11385_c0_g1	atr:18442240	39.8	2.6e-57	NA	NA	NA	NA	NA	NA	NA	NA	NA
TRINITY_DN11396_c0_g1	egr:104436101	62.3	2.3e-19	-	40S ribosomal protein S12	K02951	small subunit ribosomal protein S12e	-	egr03010	Ribosome	Genetic Information Processing	Translation
TRINITY_DN11399_c0_g2	atr:18439879	38.4	1e-193	NA	NA	NA	NA	NA	NA	NA	NA	NA
TRINITY_DN11404_c0_g1	apro:F751_5346	42.4	1.9e-12	-	30S ribosomal protein S10	K02946	small subunit ribosomal protein S10	-	apro03010	Ribosome	Genetic Information Processing	Translation
TRINITY_DN11424_c0_g1	bpg:Bathy06g02640	45.2	5.6e-14	NA	NA	NA	NA	NA	NA	NA	NA	NA
TRINITY_DN11429_c0_g1	bpg:Bathy07g01230	40.5	4.3e-09	-	hypothetical protein	K13293	cAMP-specific phosphodiesterase 4	EC:3.1.4.53	bpg00230	Purine metabolism	Metabolism	Nucleotide metabolism
TRINITY_DN11468_c0_g2	csat:104745952	24	1.5e-23	NA	NA	NA	NA	NA	NA	NA	NA	NA
TRINITY_DN11487_c0_g3	egr:104446786	29.1	6.4e-17	-	phenylalanine--tRNA ligase beta subunit	K01890	phenylalanyl-tRNA synthetase beta chain	EC:6.1.1.20	egr00970	Aminoacyl-tRNA biosynthesis	Genetic Information Processing	Translation
TRINITY_DN11491_c0_g1	sot:102584253	42	2e-64	-	putative D-cysteine desulfhydrase 1	K05396	D-cysteine desulfhydrase	EC:4.4.1.15	sot00270	Cysteine and methionine metabolism	Metabolism	Amino acid metabolism
TRINITY_DN11505_c0_g1	ota:OstapMp24	61.4	6.3e-18	Cox1_1	Cox1_1	K02256	cytochrome c oxidase subunit 1	EC:1.9.3.1	ota00190	Oxidative phosphorylation	Metabolism	Energy metabolism
TRINITY_DN11506_c0_g1	pvu:PHAVU_005G031500g	35	5.9e-25	-	hypothetical protein	K09841	xanthoxin dehydrogenase	EC:1.1.1.288	pvu00906	Carotenoid biosynthesis	Metabolism	Metabolism of terpenoids and polyketides
TRINITY_DN11521_c0_g1	smo:SELMODRAFT_120595	42.9	1.1e-58	NA	NA	NA	NA	NA	NA	NA	NA	NA
TRINITY_DN11540_c0_g1	adu:107492946	93.9	1.9e-17	-	probable galactinol--sucrose galactosyltransferase 2	K06617	raffinose synthase	EC:2.4.1.82	adu00052	Galactose metabolism	Metabolism	Carbohydrate metabolism
TRINITY_DN11551_c0_g1	cann:107845623	55	2e-34	NA	NA	NA	NA	NA	NA	NA	NA	NA
TRINITY_DN11554_c0_g1	pvu:PHAVU_009G203000g	33.5	5.5e-13	-	hypothetical protein	K14406	cleavage stimulation factor subunit 1	-	pvu03015	mRNA surveillance pathway	Genetic Information Processing	Translation
TRINITY_DN11555_c0_g6	ccp:ChcroMp07	55.6	2.8e-109	cob	apocytochrome b	K00412	ubiquinol-cytochrome c reductase cytochrome b subunit	-	ccp00190	Oxidative phosphorylation	Metabolism	Energy metabolism
TRINITY_DN11583_c0_g1	dct:110109355	56.3	1.6e-28	-	DNA-directed RNA polymerases II	K03017	DNA-directed RNA polymerase II subunit RPB9	-	dct00230	Purine metabolism	Metabolism	Nucleotide metabolism
TRINITY_DN11583_c0_g1	dct:110109355	56.3	1.6e-28	-	DNA-directed RNA polymerases II	K03017	DNA-directed RNA polymerase II subunit RPB9	-	dct00240	Pyrimidine metabolism	Metabolism	Nucleotide metabolism
TRINITY_DN11583_c0_g1	dct:110109355	56.3	1.6e-28	-	DNA-directed RNA polymerases II	K03017	DNA-directed RNA polymerase II subunit RPB9	-	dct03020	RNA polymerase	Genetic Information Processing	Transcription
TRINITY_DN11591_c0_g2	gsl:Gasu_16370	78	7.9e-64	-	40S ribosomal protein S18	K02964	small subunit ribosomal protein S18e	-	gsl03010	Ribosome	Genetic Information Processing	Translation
TRINITY_DN11592_c0_g1	ota:OT_ostta04g02970	46.6	5.8e-67	-	Ribosomal protein L1	K02865	large subunit ribosomal protein L10Ae	-	ota03010	Ribosome	Genetic Information Processing	Translation
TRINITY_DN11626_c0_g1	mpp:MICPUCDRAFT_49539	56.1	6.6e-68	MSD	manganese superoxide dismutase	K04564	superoxide dismutase, Fe-Mn family	EC:1.15.1.1	mpp04146	Peroxisome	Cellular Processes	Transport and catabolism
TRINITY_DN11628_c0_g2	csl:COCSUDRAFT_24567	71.2	3e-54	-	ribosomal protein L17 component of cytosolic 80S ribosome and 60S large subunit	K02880	large subunit ribosomal protein L17e	-	csl03010	Ribosome	Genetic Information Processing	Translation
TRINITY_DN11630_c0_g1	boe:106339476	39.8	9.1e-18	-	60S ribosomal protein L24-1 isoform X1	K02896	large subunit ribosomal protein L24e	-	boe03010	Ribosome	Genetic Information Processing	Translation
TRINITY_DN11630_c0_g2	gsl:Gasu_49960	60.2	1.3e-24	-	pleiotropic regulator 1	K12862	pleiotropic regulator 1	-	gsl03040	Spliceosome	Genetic Information Processing	Transcription
TRINITY_DN11631_c0_g1	jcu:105634893	52.9	3.5e-41	-	lys-63-specific deubiquitinase BRCC36	K11864	BRCA1/BRCA2-containing complex subunit 3	EC:3.4.19.-	jcu03440	Homologous recombination	Genetic Information Processing	Replication and repair
TRINITY_DN11632_c0_g1	csl:COCSUDRAFT_26991	58	9.5e-45	NA	NA	NA	NA	NA	NA	NA	NA	NA
TRINITY_DN11648_c0_g1	mtr:MTR_3g053520	53.1	2.2e-21	-	small ubiquitin-like modifier 3	K12160	small ubiquitin-related modifier	-	mtr03013	RNA transport	Genetic Information Processing	Translation
TRINITY_DN11648_c0_g2	pda:108511792	42	1.9e-15	-	50S ribosomal protein L22	K02890	large subunit ribosomal protein L22	-	pda03010	Ribosome	Genetic Information Processing	Translation
TRINITY_DN11651_c0_g1	vcn:VOLCADRAFT_75232	55.6	7.5e-26	-	hypothetical protein	K01764	cytochrome c heme-lyase	EC:4.4.1.17	vcn00860	Porphyrin and chlorophyll metabolism	Metabolism	Metabolism of cofactors and vitamins
TRINITY_DN11652_c0_g2	pda:103722793	31.5	1.5e-07	-	superoxide dismutase [Cu-Zn]-like	K04565	superoxide dismutase, Cu-Zn family	EC:1.15.1.1	pda04146	Peroxisome	Cellular Processes	Transport and catabolism
TRINITY_DN11670_c0_g1	ath:ArthCp069	100	7.1e-33	rps7	ribosomal protein S7	K02992	small subunit ribosomal protein S7	-	ath03010	Ribosome	Genetic Information Processing	Translation
TRINITY_DN11670_c0_g2	zju:107404780	81.2	1.3e-37	-	30S ribosomal protein S12	K02950	small subunit ribosomal protein S12	-	zju03010	Ribosome	Genetic Information Processing	Translation
TRINITY_DN11670_c0_g3	mtr:MTR_4g006100	85.9	1.8e-29	-	NAD(P)H-quinone oxidoreductase subunit H	K05579	NAD(P)H-quinone oxidoreductase subunit H	EC:1.6.5.3	mtr00190	Oxidative phosphorylation	Metabolism	Energy metabolism
TRINITY_DN11690_c0_g1	ccp:CHC_T00007902001	37	1.1e-11	NA	NA	NA	NA	NA	NA	NA	NA	NA
TRINITY_DN11703_c0_g1	csat:104780954	70.7	4.3e-84	-	60S ribosomal protein L8-2	K02938	large subunit ribosomal protein L8e	-	csat03010	Ribosome	Genetic Information Processing	Translation
TRINITY_DN11713_c0_g1	ccp:CHC_T00002449001	35.7	8.7e-33	-	hypothetical protein	K01424	L-asparaginase	EC:3.5.1.1	ccp00250	Alanine, aspartate and glutamate metabolism	Metabolism	Amino acid metabolism
TRINITY_DN11713_c0_g1	ccp:CHC_T00002449001	35.7	8.7e-33	-	hypothetical protein	K01424	L-asparaginase	EC:3.5.1.1	ccp00460	Cyanoamino acid metabolism	Metabolism	Metabolism of other amino acids
TRINITY_DN11744_c0_g1	bna:106443236	30.1	4.3e-43	-	pyruvate kinase	K00873	pyruvate kinase	EC:2.7.1.40	bna00010	Glycolysis / Gluconeogenesis	Metabolism	Carbohydrate metabolism
TRINITY_DN11744_c0_g1	bna:106443236	30.1	4.3e-43	-	pyruvate kinase	K00873	pyruvate kinase	EC:2.7.1.40	bna00620	Pyruvate metabolism	Metabolism	Carbohydrate metabolism
TRINITY_DN11744_c0_g1	bna:106443236	30.1	4.3e-43	-	pyruvate kinase	K00873	pyruvate kinase	EC:2.7.1.40	bna00230	Purine metabolism	Metabolism	Nucleotide metabolism
TRINITY_DN11751_c0_g1	ota:OT_ostta04g05000	59.6	4e-07	-	Domain of unknown function DUF1777	K12846	U4/U6.U5 tri-snRNP-associated protein 3	-	ota03040	Spliceosome	Genetic Information Processing	Transcription
TRINITY_DN11759_c0_g1	sind:105159937	49.4	9.2e-163	-	protein arginine N-methyltransferase 1.5	K02516	type II protein arginine methyltransferase	EC:2.1.1.320	sind03013	RNA transport	Genetic Information Processing	Translation
TRINITY_DN11763_c0_g1	cre:CHLREDRAFT_58501	40	2e-13	BHSD1	steroid dehydrogenase	K07748	sterol-4alpha-carboxylate 3-dehydrogenase (decarboxylating)	EC:1.1.1.170	cre00100	Steroid biosynthesis	Metabolism	Lipid metabolism
TRINITY_DN11765_c0_g2	cme:CymeCp184	63	9.4e-30	rpoB	RNA polymerase beta subunit	K03043	DNA-directed RNA polymerase subunit beta	EC:2.7.7.6	cme00230	Purine metabolism	Metabolism	Nucleotide metabolism
TRINITY_DN11765_c0_g2	cme:CymeCp184	63	9.4e-30	rpoB	RNA polymerase beta subunit	K03043	DNA-directed RNA polymerase subunit beta	EC:2.7.7.6	cme00240	Pyrimidine metabolism	Metabolism	Nucleotide metabolism
TRINITY_DN11765_c0_g2	cme:CymeCp184	63	9.4e-30	rpoB	RNA polymerase beta subunit	K03043	DNA-directed RNA polymerase subunit beta	EC:2.7.7.6	cme03020	RNA polymerase	Genetic Information Processing	Transcription
TRINITY_DN11769_c1_g2	bna:4237893	100	4.7e-96	nad7	NADH dehydrogenase subunit 7	K03935	NADH dehydrogenase (ubiquinone) Fe-S protein 2	EC:1.6.5.3 1.6.99.3	bna00190	Oxidative phosphorylation	Metabolism	Energy metabolism
TRINITY_DN1178_c0_g1	aip:107630721	34.9	3.1e-06	NA	NA	NA	NA	NA	NA	NA	NA	NA
TRINITY_DN11812_c0_g1	gra:105793996	79.2	2.4e-12	-	60S ribosomal protein L38-like	K02923	large subunit ribosomal protein L38e	-	gra03010	Ribosome	Genetic Information Processing	Translation
TRINITY_DN11825_c0_g1	thj:104807647	100	9.4e-36	-	tubulin alpha chain isoform X1	K07374	tubulin alpha	-	thj04145	Phagosome	Cellular Processes	Transport and catabolism
TRINITY_DN11833_c0_g1	han:110916300	28.5	1.3e-29	-	phosphatidylserine decarboxylase proenzyme 1	K01613	phosphatidylserine decarboxylase	EC:4.1.1.65	han00564	Glycerophospholipid metabolism	Metabolism	Lipid metabolism
TRINITY_DN11840_c1_g1	mis:MICPUN_90093	64.3	6.5e-58	-	predicted protein	K06688	ubiquitin-conjugating enzyme E2 C	EC:2.3.2.23	mis04120	Ubiquitin mediated proteolysis	Genetic Information Processing	Folding, sorting and degradation
TRINITY_DN11843_c0_g1	adu:107458442	100	8.9e-46	-	fructose-bisphosphate aldolase	K01623	fructose-bisphosphate aldolase, class I	EC:4.1.2.13	adu00010	Glycolysis / Gluconeogenesis	Metabolism	Carbohydrate metabolism
TRINITY_DN11843_c0_g1	adu:107458442	100	8.9e-46	-	fructose-bisphosphate aldolase	K01623	fructose-bisphosphate aldolase, class I	EC:4.1.2.13	adu00030	Pentose phosphate pathway	Metabolism	Carbohydrate metabolism
TRINITY_DN11843_c0_g1	adu:107458442	100	8.9e-46	-	fructose-bisphosphate aldolase	K01623	fructose-bisphosphate aldolase, class I	EC:4.1.2.13	adu00051	Fructose and mannose metabolism	Metabolism	Carbohydrate metabolism
TRINITY_DN11843_c0_g1	adu:107458442	100	8.9e-46	-	fructose-bisphosphate aldolase	K01623	fructose-bisphosphate aldolase, class I	EC:4.1.2.13	adu00710	Carbon fixation in photosynthetic organisms	Metabolism	Energy metabolism
TRINITY_DN11843_c0_g2	adu:107458442	100	1.1e-30	-	fructose-bisphosphate aldolase	K01623	fructose-bisphosphate aldolase, class I	EC:4.1.2.13	adu00010	Glycolysis / Gluconeogenesis	Metabolism	Carbohydrate metabolism
TRINITY_DN11843_c0_g2	adu:107458442	100	1.1e-30	-	fructose-bisphosphate aldolase	K01623	fructose-bisphosphate aldolase, class I	EC:4.1.2.13	adu00030	Pentose phosphate pathway	Metabolism	Carbohydrate metabolism
TRINITY_DN11843_c0_g2	adu:107458442	100	1.1e-30	-	fructose-bisphosphate aldolase	K01623	fructose-bisphosphate aldolase, class I	EC:4.1.2.13	adu00051	Fructose and mannose metabolism	Metabolism	Carbohydrate metabolism
TRINITY_DN11843_c0_g2	adu:107458442	100	1.1e-30	-	fructose-bisphosphate aldolase	K01623	fructose-bisphosphate aldolase, class I	EC:4.1.2.13	adu00710	Carbon fixation in photosynthetic organisms	Metabolism	Energy metabolism
TRINITY_DN11855_c0_g3	gsl:Gasu_20410	41.2	1.3e-21	NA	NA	NA	NA	NA	NA	NA	NA	NA
TRINITY_DN11879_c0_g1	brp:103874968	33	5.9e-68	NA	NA	NA	NA	NA	NA	NA	NA	NA
TRINITY_DN11883_c0_g2	aly:ARALYDRAFT_317410	40.8	4.1e-36	-	phospholipid/glycerol acyltransferase family protein	K13511	monolysocardiolipin acyltransferase	EC:2.3.1.-	aly00564	Glycerophospholipid metabolism	Metabolism	Lipid metabolism
TRINITY_DN11885_c0_g1	nto:104087037	44.6	2.6e-21	-	tryptophan--tRNA ligase	K01867	tryptophanyl-tRNA synthetase	EC:6.1.1.2	nto00970	Aminoacyl-tRNA biosynthesis	Genetic Information Processing	Translation
TRINITY_DN11893_c0_g1	ath:AT5G09810	100	2.1e-37	NA	NA	NA	NA	NA	NA	NA	NA	NA
TRINITY_DN11893_c0_g2	bpg:Bathy07g04710	94.7	6.6e-50	NA	NA	NA	NA	NA	NA	NA	NA	NA
TRINITY_DN11916_c0_g1	ath:AT3G54860	30.9	9.4e-81	NA	NA	NA	NA	NA	NA	NA	NA	NA
TRINITY_DN11918_c0_g1	vcn:VOLCADRAFT_62848	66.5	1.2e-194	NA	NA	NA	NA	NA	NA	NA	NA	NA
TRINITY_DN11954_c0_g1	ath:AT3G08580	100	6.4e-34	NA	NA	NA	NA	NA	NA	NA	NA	NA
TRINITY_DN11956_c0_g1	hbr:110658646	49.2	3.6e-26	-	ubiquitin-conjugating enzyme E2 14-like	K10575	ubiquitin-conjugating enzyme E2 G1	EC:2.3.2.23	hbr04141	Protein processing in endoplasmic reticulum	Genetic Information Processing	Folding, sorting and degradation
TRINITY_DN11956_c0_g1	hbr:110658646	49.2	3.6e-26	-	ubiquitin-conjugating enzyme E2 14-like	K10575	ubiquitin-conjugating enzyme E2 G1	EC:2.3.2.23	hbr04120	Ubiquitin mediated proteolysis	Genetic Information Processing	Folding, sorting and degradation
TRINITY_DN11963_c0_g2	csl:COCSUDRAFT_14314	37.6	9.5e-38	-	Abi-domain-containing protein	K08658	prenyl protein peptidase	EC:3.4.22.-	csl00900	Terpenoid backbone biosynthesis	Metabolism	Metabolism of terpenoids and polyketides
TRINITY_DN11964_c0_g1	cic:CICLE_v10015820mg	57.5	5.6e-28	NA	NA	NA	NA	NA	NA	NA	NA	NA
TRINITY_DN11970_c0_g1	gsl:Gasu_04650	54.7	6e-120	-	glyceraldehyde 3-phosphate dehydrogenase (phosphorylating)	K00134	glyceraldehyde 3-phosphate dehydrogenase	EC:1.2.1.12	gsl00010	Glycolysis / Gluconeogenesis	Metabolism	Carbohydrate metabolism
TRINITY_DN11970_c0_g1	gsl:Gasu_04650	54.7	6e-120	-	glyceraldehyde 3-phosphate dehydrogenase (phosphorylating)	K00134	glyceraldehyde 3-phosphate dehydrogenase	EC:1.2.1.12	gsl00710	Carbon fixation in photosynthetic organisms	Metabolism	Energy metabolism
TRINITY_DN11971_c0_g3	nnu:28482692	99.2	1.1e-152	cox3	cytochrome c oxidase subunit 3	K02262	cytochrome c oxidase subunit 3	-	nnu00190	Oxidative phosphorylation	Metabolism	Energy metabolism
TRINITY_DN11985_c0_g1	mis:MICPUN_97460	69.3	4.8e-52	-	deoxyuridine 5'-triphosphate nucleotidohydrolase	K01520	dUTP pyrophosphatase	EC:3.6.1.23	mis00240	Pyrimidine metabolism	Metabolism	Nucleotide metabolism
TRINITY_DN11991_c0_g1	vcn:VOLCADRAFT_80016	61.6	5.4e-144	-	hypothetical protein	K01867	tryptophanyl-tRNA synthetase	EC:6.1.1.2	vcn00970	Aminoacyl-tRNA biosynthesis	Genetic Information Processing	Translation
TRINITY_DN11992_c0_g1	vcn:VOLCADRAFT_83746	78.9	5e-205	NA	NA	NA	NA	NA	NA	NA	NA	NA
TRINITY_DN11997_c0_g1	mis:MICPUN_87955	60.3	4.1e-16	-	predicted protein	K02884	large subunit ribosomal protein L19	-	mis03010	Ribosome	Genetic Information Processing	Translation
TRINITY_DN11998_c0_g1	smo:SELMODRAFT_141696	29	1.8e-07	-	hypothetical protein	K00477	phytanoyl-CoA hydroxylase	EC:1.14.11.18	smo04146	Peroxisome	Cellular Processes	Transport and catabolism
TRINITY_DN12001_c0_g1	csl:COCSUDRAFT_46053	28.7	1.4e-16	-	hypothetical protein	K10685	ubiquitin-like 1-activating enzyme E1 B	EC:6.2.1.45	csl04120	Ubiquitin mediated proteolysis	Genetic Information Processing	Folding, sorting and degradation
TRINITY_DN12012_c0_g1	tcc:18609497	84.4	1.2e-27	-	DNA-directed RNA polymerases I	K03007	DNA-directed RNA polymerases I, II, and III subunit RPABC5	-	tcc00230	Purine metabolism	Metabolism	Nucleotide metabolism
TRINITY_DN12012_c0_g1	tcc:18609497	84.4	1.2e-27	-	DNA-directed RNA polymerases I	K03007	DNA-directed RNA polymerases I, II, and III subunit RPABC5	-	tcc00240	Pyrimidine metabolism	Metabolism	Nucleotide metabolism
TRINITY_DN12012_c0_g1	tcc:18609497	84.4	1.2e-27	-	DNA-directed RNA polymerases I	K03007	DNA-directed RNA polymerases I, II, and III subunit RPABC5	-	tcc03020	RNA polymerase	Genetic Information Processing	Transcription
TRINITY_DN12012_c0_g3	cre:CHLREDRAFT_205758	59.7	6.2e-118	NA	NA	NA	NA	NA	NA	NA	NA	NA
TRINITY_DN12028_c0_g1	ccp:CHC_T00005518001	42.6	1.3e-14	NA	NA	NA	NA	NA	NA	NA	NA	NA
TRINITY_DN12033_c0_g1	soe:110791630	72.2	1.1e-93	-	splicing factor 3B subunit 4	K12831	splicing factor 3B subunit 4	-	soe03040	Spliceosome	Genetic Information Processing	Transcription
TRINITY_DN12042_c0_g1	olu:OSTLU_28526	43.1	1.3e-68	NA	NA	NA	NA	NA	NA	NA	NA	NA
TRINITY_DN12046_c0_g1	zma:103647598	32.4	4.8e-40	-	alpha-L-fucosidase 1	K01206	alpha-L-fucosidase	EC:3.2.1.51	zma00511	Other glycan degradation	Metabolism	Glycan biosynthesis and metabolism
TRINITY_DN12051_c0_g1	adu:107486957	34.6	7e-44	-	heat shock cognate 70 kDa protein	K03283	heat shock 70kDa protein 1/2/6/8	-	adu03040	Spliceosome	Genetic Information Processing	Transcription
TRINITY_DN12051_c0_g1	adu:107486957	34.6	7e-44	-	heat shock cognate 70 kDa protein	K03283	heat shock 70kDa protein 1/2/6/8	-	adu04141	Protein processing in endoplasmic reticulum	Genetic Information Processing	Folding, sorting and degradation
TRINITY_DN12051_c0_g1	adu:107486957	34.6	7e-44	-	heat shock cognate 70 kDa protein	K03283	heat shock 70kDa protein 1/2/6/8	-	adu04144	Endocytosis	Cellular Processes	Transport and catabolism
TRINITY_DN1207_c0_g1	zju:107429322	43.1	1.9e-66	-	phytanoyl-CoA dioxygenase	K00477	phytanoyl-CoA hydroxylase	EC:1.14.11.18	zju04146	Peroxisome	Cellular Processes	Transport and catabolism
TRINITY_DN12084_c0_g1	atr:18435801	39.8	2.8e-28	NA	NA	NA	NA	NA	NA	NA	NA	NA
TRINITY_DN12104_c0_g1	csl:COCSUDRAFT_4708	28.8	9.5e-08	NA	NA	NA	NA	NA	NA	NA	NA	NA
TRINITY_DN12106_c1_g1	bvg:104886905	33.9	3.5e-64	NA	NA	NA	NA	NA	NA	NA	NA	NA
TRINITY_DN12110_c0_g1	csl:COCSUDRAFT_65434	33.9	1.8e-24	-	hypothetical protein	K13347	peroxisomal membrane protein 2	-	csl04146	Peroxisome	Cellular Processes	Transport and catabolism
TRINITY_DN12114_c0_g1	aip:107643026	100	3.1e-66	NA	NA	NA	NA	NA	NA	NA	NA	NA
TRINITY_DN12119_c0_g1	bvg:104895376	61.6	1.5e-64	-	choline-phosphate cytidylyltransferase 2	K00968	choline-phosphate cytidylyltransferase	EC:2.7.7.15	bvg00564	Glycerophospholipid metabolism	Metabolism	Lipid metabolism
TRINITY_DN12119_c0_g1	bvg:104895376	61.6	1.5e-64	-	choline-phosphate cytidylyltransferase 2	K00968	choline-phosphate cytidylyltransferase	EC:2.7.7.15	bvg00440	Phosphonate and phosphinate metabolism	Metabolism	Metabolism of other amino acids
TRINITY_DN12119_c0_g2	gra:105794851	65.9	6.4e-45	-	nuclear cap-binding protein subunit 2	K12883	nuclear cap-binding protein subunit 2	-	gra03040	Spliceosome	Genetic Information Processing	Transcription
TRINITY_DN12119_c0_g2	gra:105794851	65.9	6.4e-45	-	nuclear cap-binding protein subunit 2	K12883	nuclear cap-binding protein subunit 2	-	gra03013	RNA transport	Genetic Information Processing	Translation
TRINITY_DN12119_c0_g2	gra:105794851	65.9	6.4e-45	-	nuclear cap-binding protein subunit 2	K12883	nuclear cap-binding protein subunit 2	-	gra03015	mRNA surveillance pathway	Genetic Information Processing	Translation
TRINITY_DN12122_c0_g1	egr:104448830	58.5	9.6e-86	NA	NA	NA	NA	NA	NA	NA	NA	NA
TRINITY_DN12125_c0_g1	mng:MNEG_2672	31.2	2.7e-09	NA	NA	NA	NA	NA	NA	NA	NA	NA
TRINITY_DN12148_c0_g1	cit:102614310	25.6	1.2e-28	-	sorbitol dehydrogenase-like isoform X1	K00008	L-iditol 2-dehydrogenase	EC:1.1.1.14	cit00040	Pentose and glucuronate interconversions	Metabolism	Carbohydrate metabolism
TRINITY_DN12148_c0_g1	cit:102614310	25.6	1.2e-28	-	sorbitol dehydrogenase-like isoform X1	K00008	L-iditol 2-dehydrogenase	EC:1.1.1.14	cit00051	Fructose and mannose metabolism	Metabolism	Carbohydrate metabolism
TRINITY_DN12161_c0_g1	osa:4325272	23.2	9.8e-31	NA	NA	NA	NA	NA	NA	NA	NA	NA
TRINITY_DN12163_c0_g1	gsl:Gasu_46140	53.9	1.2e-96	-	pyruvate dehydrogenase E1 component subunit alpha	K00161	pyruvate dehydrogenase E1 component alpha subunit	EC:1.2.4.1	gsl00010	Glycolysis / Gluconeogenesis	Metabolism	Carbohydrate metabolism
TRINITY_DN12163_c0_g1	gsl:Gasu_46140	53.9	1.2e-96	-	pyruvate dehydrogenase E1 component subunit alpha	K00161	pyruvate dehydrogenase E1 component alpha subunit	EC:1.2.4.1	gsl00020	Citrate cycle (TCA cycle)	Metabolism	Carbohydrate metabolism
TRINITY_DN12163_c0_g1	gsl:Gasu_46140	53.9	1.2e-96	-	pyruvate dehydrogenase E1 component subunit alpha	K00161	pyruvate dehydrogenase E1 component alpha subunit	EC:1.2.4.1	gsl00620	Pyruvate metabolism	Metabolism	Carbohydrate metabolism
TRINITY_DN12166_c0_g1	gra:105797626	41.6	2.4e-11	-	Golgi SNAP receptor complex member 1-2	K08495	golgi SNAP receptor complex member 1	-	gra04130	SNARE interactions in vesicular transport	Genetic Information Processing	Folding, sorting and degradation
TRINITY_DN12171_c0_g1	mcha:111024403	42.4	4.8e-29	-	ubiquitin-conjugating enzyme E2 11-like	K06689	ubiquitin-conjugating enzyme E2 D	EC:2.3.2.23	mcha04141	Protein processing in endoplasmic reticulum	Genetic Information Processing	Folding, sorting and degradation
TRINITY_DN12171_c0_g1	mcha:111024403	42.4	4.8e-29	-	ubiquitin-conjugating enzyme E2 11-like	K06689	ubiquitin-conjugating enzyme E2 D	EC:2.3.2.23	mcha04120	Ubiquitin mediated proteolysis	Genetic Information Processing	Folding, sorting and degradation
TRINITY_DN12192_c0_g1	thj:104807265	58.5	6.7e-193	-	methylcrotonoyl-CoA carboxylase beta chain	K01969	3-methylcrotonyl-CoA carboxylase beta subunit	EC:6.4.1.4	thj00280	Valine, leucine and isoleucine degradation	Metabolism	Amino acid metabolism
TRINITY_DN12197_c0_g1	ini:109179428	55.1	1.4e-75	NA	NA	NA	NA	NA	NA	NA	NA	NA
TRINITY_DN12203_c0_g1	smo:SELMODRAFT_439586	50	9.4e-09	NA	NA	NA	NA	NA	NA	NA	NA	NA
TRINITY_DN12206_c0_g1	ccp:CHC_T00003369001	40	8.5e-09	-	hypothetical protein	K10534	nitrate reductase (NAD(P)H)	EC:1.7.1.1 1.7.1.2 1.7.1.3	ccp00910	Nitrogen metabolism	Metabolism	Energy metabolism
TRINITY_DN12206_c0_g2	pda:103720545	46	1.1e-53	NA	NA	NA	NA	NA	NA	NA	NA	NA
TRINITY_DN12213_c0_g1	soe:110794578	39.7	1.5e-08	NA	NA	NA	NA	NA	NA	NA	NA	NA
TRINITY_DN12221_c0_g1	mpp:MICPUCDRAFT_50851	46.2	2.5e-06	NA	NA	NA	NA	NA	NA	NA	NA	NA
TRINITY_DN12225_c0_g1	ota:OT_ostta05g02280	51.5	2.5e-53	-	Small GTPase superfamily	K07901	Ras-related protein Rab-8A	-	ota04144	Endocytosis	Cellular Processes	Transport and catabolism
TRINITY_DN12234_c0_g3	apro:F751_0616	62.2	2.1e-28	NA	NA	NA	NA	NA	NA	NA	NA	NA
TRINITY_DN12247_c0_g1	nta:107803596	36.4	2.3e-37	NA	NA	NA	NA	NA	NA	NA	NA	NA
TRINITY_DN12269_c0_g1	sind:105170499	40.2	1.3e-14	NA	NA	NA	NA	NA	NA	NA	NA	NA
TRINITY_DN12277_c0_g1	dosa:Os03t0263600-01	36.7	1.5e-52	NA	NA	NA	NA	NA	NA	NA	NA	NA
TRINITY_DN12284_c0_g1	pda:103703291	38.1	1.7e-09	NA	NA	NA	NA	NA	NA	NA	NA	NA
TRINITY_DN12285_c0_g1	mtr:MTR_8g088060	89.6	1.5e-59	-	ubiquitin-40S ribosomal S27a-like protein	K02977	small subunit ribosomal protein S27Ae	-	mtr03010	Ribosome	Genetic Information Processing	Translation
TRINITY_DN12292_c0_g3	mdm:103408320	38.4	6.2e-15	-	ethylene-insensitive protein 2-like	K14513	ethylene-insensitive protein 2	-	mdm04016	MAPK signaling pathway - plant	Environmental Information Processing	Signal transduction
TRINITY_DN12292_c0_g3	mdm:103408320	38.4	6.2e-15	-	ethylene-insensitive protein 2-like	K14513	ethylene-insensitive protein 2	-	mdm04075	Plant hormone signal transduction	Environmental Information Processing	Signal transduction
TRINITY_DN12301_c0_g1	gra:105800793	100	4.2e-54	NA	NA	NA	NA	NA	NA	NA	NA	NA
TRINITY_DN12302_c0_g1	thj:104821707	38.5	8.8e-10	-	tocopherol O-methyltransferase	K05928	tocopherol O-methyltransferase	EC:2.1.1.95	thj00130	Ubiquinone and other terpenoid-quinone biosynthesis	Metabolism	Metabolism of cofactors and vitamins
TRINITY_DN12313_c0_g1	mis:MICPUN_58233	33.6	4.9e-50	NA	NA	NA	NA	NA	NA	NA	NA	NA
TRINITY_DN12319_c0_g1	vcn:VOLCADRAFT_76255	48.1	3.1e-06	NA	NA	NA	NA	NA	NA	NA	NA	NA
TRINITY_DN12325_c0_g1	han:110891379	51.5	1.3e-33	-	RNA-binding protein Y14A-like	K12876	RNA-binding protein 8A	-	han03040	Spliceosome	Genetic Information Processing	Transcription
TRINITY_DN12325_c0_g1	han:110891379	51.5	1.3e-33	-	RNA-binding protein Y14A-like	K12876	RNA-binding protein 8A	-	han03013	RNA transport	Genetic Information Processing	Translation
TRINITY_DN12325_c0_g1	han:110891379	51.5	1.3e-33	-	RNA-binding protein Y14A-like	K12876	RNA-binding protein 8A	-	han03015	mRNA surveillance pathway	Genetic Information Processing	Translation
TRINITY_DN12327_c0_g1	ccp:CHC_T00001932001	47.2	3.1e-41	-	hypothetical protein	K01495	GTP cyclohydrolase IA	EC:3.5.4.16	ccp00790	Folate biosynthesis	Metabolism	Metabolism of cofactors and vitamins
TRINITY_DN12333_c0_g1	mdm:103412547	42.4	3.3e-96	NA	NA	NA	NA	NA	NA	NA	NA	NA
TRINITY_DN12343_c0_g1	osa:4349122	30	6.1e-22	-	pyridoxal reductase	K05275	pyridoxine 4-dehydrogenase	EC:1.1.1.65	osa00750	Vitamin B6 metabolism	Metabolism	Metabolism of cofactors and vitamins
TRINITY_DN12354_c0_g1	csl:COCSUDRAFT_16077	30.8	1.3e-30	-	alpha/beta-hydrolase	K01054	acylglycerol lipase	EC:3.1.1.23	csl00561	Glycerolipid metabolism	Metabolism	Lipid metabolism
TRINITY_DN12354_c0_g2	csl:COCSUDRAFT_16077	32.8	5.7e-35	-	alpha/beta-hydrolase	K01054	acylglycerol lipase	EC:3.1.1.23	csl00561	Glycerolipid metabolism	Metabolism	Lipid metabolism
TRINITY_DN12363_c0_g1	vcn:VOLCADRAFT_72671	41.5	9.1e-10	NA	NA	NA	NA	NA	NA	NA	NA	NA
TRINITY_DN12383_c0_g6	sind:105165333	54.8	7.3e-19	-	signal recognition particle 9 kDa protein	K03109	signal recognition particle subunit SRP9	-	sind03060	Protein export	Genetic Information Processing	Folding, sorting and degradation
TRINITY_DN12386_c0_g2	spen:107032148	36.4	1.4e-29	NA	NA	NA	NA	NA	NA	NA	NA	NA
TRINITY_DN12393_c0_g1	smo:SELMODRAFT_102150	73.5	9e-59	NA	NA	NA	NA	NA	NA	NA	NA	NA
TRINITY_DN12393_c0_g2	smo:SELMODRAFT_80665	66.8	3.2e-129	NA	NA	NA	NA	NA	NA	NA	NA	NA
TRINITY_DN12411_c0_g1	mis:MICPUN_95175	36.5	7.8e-52	NA	NA	NA	NA	NA	NA	NA	NA	NA
TRINITY_DN12414_c0_g1	cann:107859974	33.4	1.9e-62	NA	NA	NA	NA	NA	NA	NA	NA	NA
TRINITY_DN12424_c0_g1	ats:109732228	38.7	8.5e-19	LOC109732228	protein FLOWERING LOCUS T-like	K16223	protein FLOWERING LOCUS T	-	ats04712	Circadian rhythm - plant	Organismal Systems	Environmental adaptation
TRINITY_DN12425_c0_g1	atr:18437386	35.9	4e-21	NA	NA	NA	NA	NA	NA	NA	NA	NA
TRINITY_DN12439_c0_g1	nta:107762248	59.6	3.3e-34	-	probable phosphopantothenoylcysteine decarboxylase	K01598	phosphopantothenoylcysteine decarboxylase	EC:4.1.1.36	nta00770	Pantothenate and CoA biosynthesis	Metabolism	Metabolism of cofactors and vitamins
TRINITY_DN12443_c0_g1	mus:103980298	49.8	1.3e-50	NA	NA	NA	NA	NA	NA	NA	NA	NA
TRINITY_DN12452_c0_g1	han:110895905	45.4	7.2e-17	-	probable NADH dehydrogenase [ubiquinone] 1 alpha subcomplex subunit 12	K11352	NADH dehydrogenase (ubiquinone) 1 alpha subcomplex subunit 12	-	han00190	Oxidative phosphorylation	Metabolism	Energy metabolism
TRINITY_DN12462_c0_g1	aip:107643105	98.9	5.9e-47	-	cytokinin dehydrogenase 2	K00279	cytokinin dehydrogenase	EC:1.5.99.12	aip00908	Zeatin biosynthesis	Metabolism	Metabolism of terpenoids and polyketides
TRINITY_DN12466_c0_g1	lang:109346736	27	9.7e-11	-	polyadenylate-binding protein 3-like	K13126	polyadenylate-binding protein	-	lang03013	RNA transport	Genetic Information Processing	Translation
TRINITY_DN12466_c0_g1	lang:109346736	27	9.7e-11	-	polyadenylate-binding protein 3-like	K13126	polyadenylate-binding protein	-	lang03015	mRNA surveillance pathway	Genetic Information Processing	Translation
TRINITY_DN12466_c0_g1	lang:109346736	27	9.7e-11	-	polyadenylate-binding protein 3-like	K13126	polyadenylate-binding protein	-	lang03018	RNA degradation	Genetic Information Processing	Folding, sorting and degradation
TRINITY_DN12470_c0_g1	csv:101222977	79.8	4.4e-33	-	60S ribosomal protein L23a-like	K02893	large subunit ribosomal protein L23Ae	-	csv03010	Ribosome	Genetic Information Processing	Translation
TRINITY_DN12470_c0_g3	soe:110784079	33.3	4.9e-10	-	xanthoxin dehydrogenase-like	K09841	xanthoxin dehydrogenase	EC:1.1.1.288	soe00906	Carotenoid biosynthesis	Metabolism	Metabolism of terpenoids and polyketides
TRINITY_DN12483_c0_g1	lja:Lj4g3v0335820.1	57.8	9.9e-145	Lj4g3v0335820.1	-	K02925	large subunit ribosomal protein L3e	-	lja03010	Ribosome	Genetic Information Processing	Translation
TRINITY_DN12488_c0_g1	tcc:18591034	37.9	1.6e-15	NA	NA	NA	NA	NA	NA	NA	NA	NA
TRINITY_DN12492_c0_g1	sita:101780677	25.3	1.9e-29	-	phospholipase D Z isoform X1	K16860	phospholipase D3/4	EC:3.1.4.4	sita00564	Glycerophospholipid metabolism	Metabolism	Lipid metabolism
TRINITY_DN12492_c0_g1	sita:101780677	25.3	1.9e-29	-	phospholipase D Z isoform X1	K16860	phospholipase D3/4	EC:3.1.4.4	sita00565	Ether lipid metabolism	Metabolism	Lipid metabolism
TRINITY_DN12493_c0_g1	adu:110277339	99.5	1e-224	-	uncharacterized protein LOC110277339	K02132	F-type H+-transporting ATPase subunit alpha	-	adu00190	Oxidative phosphorylation	Metabolism	Energy metabolism
TRINITY_DN12493_c0_g2	lang:109330985	69.9	9.2e-21	-	ATP synthase subunit alpha	K02132	F-type H+-transporting ATPase subunit alpha	-	lang00190	Oxidative phosphorylation	Metabolism	Energy metabolism
TRINITY_DN12494_c0_g2	osa:3131430	62.2	2.3e-07	rpl36	ribosomal protein L36	K02919	large subunit ribosomal protein L36	-	osa03010	Ribosome	Genetic Information Processing	Translation
TRINITY_DN12504_c0_g1	vcn:VOLCADRAFT_108817	68.6	9.7e-127	-	hypothetical protein	K00162	pyruvate dehydrogenase E1 component beta subunit	EC:1.2.4.1	vcn00010	Glycolysis / Gluconeogenesis	Metabolism	Carbohydrate metabolism
TRINITY_DN12504_c0_g1	vcn:VOLCADRAFT_108817	68.6	9.7e-127	-	hypothetical protein	K00162	pyruvate dehydrogenase E1 component beta subunit	EC:1.2.4.1	vcn00020	Citrate cycle (TCA cycle)	Metabolism	Carbohydrate metabolism
TRINITY_DN12504_c0_g1	vcn:VOLCADRAFT_108817	68.6	9.7e-127	-	hypothetical protein	K00162	pyruvate dehydrogenase E1 component beta subunit	EC:1.2.4.1	vcn00620	Pyruvate metabolism	Metabolism	Carbohydrate metabolism
TRINITY_DN1250_c0_g1	bvg:104901718	49.5	1.6e-23	-	heat shock 70 kDa protein-like	K03283	heat shock 70kDa protein 1/2/6/8	-	bvg03040	Spliceosome	Genetic Information Processing	Transcription
TRINITY_DN1250_c0_g1	bvg:104901718	49.5	1.6e-23	-	heat shock 70 kDa protein-like	K03283	heat shock 70kDa protein 1/2/6/8	-	bvg04141	Protein processing in endoplasmic reticulum	Genetic Information Processing	Folding, sorting and degradation
TRINITY_DN1250_c0_g1	bvg:104901718	49.5	1.6e-23	-	heat shock 70 kDa protein-like	K03283	heat shock 70kDa protein 1/2/6/8	-	bvg04144	Endocytosis	Cellular Processes	Transport and catabolism
TRINITY_DN12520_c0_g3	ccp:CHC_T00003657001	38.9	2.7e-17	NA	NA	NA	NA	NA	NA	NA	NA	NA
TRINITY_DN12532_c0_g1	smo:SELMODRAFT_99680	53.7	5.3e-41	NA	NA	NA	NA	NA	NA	NA	NA	NA
TRINITY_DN12539_c0_g1	lja:Lj2g3v3403230.1	36.5	1.9e-10	NA	NA	NA	NA	NA	NA	NA	NA	NA
TRINITY_DN1253_c0_g1	ghi:107951259	59	5.6e-45	NA	NA	NA	NA	NA	NA	NA	NA	NA
TRINITY_DN12541_c0_g1	smo:SELMODRAFT_270360	66.7	3.2e-24	NA	NA	NA	NA	NA	NA	NA	NA	NA
TRINITY_DN12541_c0_g2	tcc:18605995	57.2	5.7e-121	NA	NA	NA	NA	NA	NA	NA	NA	NA
TRINITY_DN12543_c0_g1	adu:107470071	100	5.3e-47	-	60S ribosomal protein L13-1	K02873	large subunit ribosomal protein L13e	-	adu03010	Ribosome	Genetic Information Processing	Translation
TRINITY_DN12547_c0_g1	cmo:103487077	35.3	2.6e-27	NA	NA	NA	NA	NA	NA	NA	NA	NA
TRINITY_DN12550_c0_g1	gsl:Gasu_60610	60.7	4.8e-74	-	20S proteasome subunit beta 1	K02738	20S proteasome subunit beta 1	EC:3.4.25.1	gsl03050	Proteasome	Genetic Information Processing	Folding, sorting and degradation
TRINITY_DN12552_c0_g1	apro:F751_3712	37	1.9e-52	NA	NA	NA	NA	NA	NA	NA	NA	NA
TRINITY_DN12555_c0_g1	smo:SELMODRAFT_146006	33.3	4.6e-29	-	hypothetical protein	K13989	Derlin-2/3	-	smo04141	Protein processing in endoplasmic reticulum	Genetic Information Processing	Folding, sorting and degradation
TRINITY_DN12571_c1_g2	ota:OT_ostta16g00040	50	5.3e-11	-	AMP-dependent synthetase/ligase	K15013	long-chain-fatty-acid--CoA ligase ACSBG	EC:6.2.1.3	ota00061	Fatty acid biosynthesis	Metabolism	Lipid metabolism
TRINITY_DN12571_c1_g2	ota:OT_ostta16g00040	50	5.3e-11	-	AMP-dependent synthetase/ligase	K15013	long-chain-fatty-acid--CoA ligase ACSBG	EC:6.2.1.3	ota00071	Fatty acid degradation	Metabolism	Lipid metabolism
TRINITY_DN12574_c0_g2	pda:103715361	51.2	1.3e-50	-	U2 small nuclear ribonucleoprotein A'-like	K11092	U2 small nuclear ribonucleoprotein A'	-	pda03040	Spliceosome	Genetic Information Processing	Transcription
TRINITY_DN12581_c0_g1	pvu:PHAVU_007G096300g	30	1.2e-47	-	hypothetical protein	K10775	phenylalanine ammonia-lyase	EC:4.3.1.24	pvu00360	Phenylalanine metabolism	Metabolism	Amino acid metabolism
TRINITY_DN12581_c0_g1	pvu:PHAVU_007G096300g	30	1.2e-47	-	hypothetical protein	K10775	phenylalanine ammonia-lyase	EC:4.3.1.24	pvu00940	Phenylpropanoid biosynthesis	Metabolism	Biosynthesis of other secondary metabolites
TRINITY_DN12584_c1_g1	cre:CHLREDRAFT_151144	50	4.1e-12	NA	NA	NA	NA	NA	NA	NA	NA	NA
TRINITY_DN12584_c1_g3	vcn:VOLCADRAFT_121364	53.6	1.2e-36	NA	NA	NA	NA	NA	NA	NA	NA	NA
TRINITY_DN12590_c0_g1	lang:109335868	34.5	5.9e-25	-	xanthoxin dehydrogenase	K09841	xanthoxin dehydrogenase	EC:1.1.1.288	lang00906	Carotenoid biosynthesis	Metabolism	Metabolism of terpenoids and polyketides
TRINITY_DN12604_c0_g1	mus:103996219	40.2	8.4e-100	NA	NA	NA	NA	NA	NA	NA	NA	NA
TRINITY_DN12611_c0_g1	jcu:105629504	58.9	1.3e-32	-	splicing factor U2af small subunit B	K12836	splicing factor U2AF 35 kDa subunit	-	jcu03040	Spliceosome	Genetic Information Processing	Transcription
TRINITY_DN12611_c0_g2	gsl:Gasu_56200	52.4	1.5e-17	-	40S ribosomal protein S21	K02971	small subunit ribosomal protein S21e	-	gsl03010	Ribosome	Genetic Information Processing	Translation
TRINITY_DN12618_c0_g1	gmx:100789475	43.4	6.6e-81	-	UDP-N-acetylglucosamine--dolichyl-phosphate N-acetylglucosaminephosphotransferase-like	K01001	UDP-N-acetylglucosamine--dolichyl-phosphate N-acetylglucosaminephosphotransferase	EC:2.7.8.15	gmx00510	N-Glycan biosynthesis	Metabolism	Glycan biosynthesis and metabolism
TRINITY_DN12619_c0_g1	smo:SELMODRAFT_119241	43.7	1.3e-08	NA	NA	NA	NA	NA	NA	NA	NA	NA
TRINITY_DN12625_c0_g2	gra:105773768	25.3	1.2e-10	NA	NA	NA	NA	NA	NA	NA	NA	NA
TRINITY_DN12631_c0_g2	csl:COCSUDRAFT_48950	36.4	2.4e-08	NA	NA	NA	NA	NA	NA	NA	NA	NA
TRINITY_DN12632_c0_g1	cre:CHLREDRAFT_193901	53.4	7.3e-60	MAPK8	mitogen-activated protein kinase 8	K14512	mitogen-activated protein kinase 6	EC:2.7.11.24	cre04016	MAPK signaling pathway - plant	Environmental Information Processing	Signal transduction
TRINITY_DN12632_c0_g1	cre:CHLREDRAFT_193901	53.4	7.3e-60	MAPK8	mitogen-activated protein kinase 8	K14512	mitogen-activated protein kinase 6	EC:2.7.11.24	cre04075	Plant hormone signal transduction	Environmental Information Processing	Signal transduction
TRINITY_DN12640_c0_g1	mpp:MICPUCDRAFT_44981	41.7	4.6e-06	NA	NA	NA	NA	NA	NA	NA	NA	NA
TRINITY_DN12649_c0_g1	cvr:CHLNCDRAFT_33886	31.8	3.6e-23	NA	NA	NA	NA	NA	NA	NA	NA	NA
TRINITY_DN12657_c0_g1	bna:106378389	39.2	3.3e-09	NA	NA	NA	NA	NA	NA	NA	NA	NA
TRINITY_DN12661_c0_g2	egr:104449165	49.2	4.9e-24	NA	NA	NA	NA	NA	NA	NA	NA	NA
TRINITY_DN12666_c0_g1	sind:105179904	64.5	3e-53	-	ribosome maturation protein SBDS	K14574	ribosome maturation protein SDO1	-	sind03008	Ribosome biogenesis in eukaryotes	Genetic Information Processing	Translation
TRINITY_DN12689_c0_g2	cann:107878923	29.2	1.6e-23	-	GTP-binding protein SAR2	K07953	GTP-binding protein SAR1	EC:3.6.5.-	cann04141	Protein processing in endoplasmic reticulum	Genetic Information Processing	Folding, sorting and degradation
TRINITY_DN12709_c0_g1	bvg:104907735	37.5	1.4e-37	-	DNA repair protein XRCC3 homolog	K10880	DNA-repair protein XRCC3	-	bvg03440	Homologous recombination	Genetic Information Processing	Replication and repair
TRINITY_DN12709_c0_g2	brp:103830162	27.8	1.7e-18	-	lipid phosphate phosphatase delta	K04716	sphingosine-1-phosphate phosphatase 1	EC:3.1.3.-	brp00600	Sphingolipid metabolism	Metabolism	Lipid metabolism
TRINITY_DN12721_c0_g1	brp:103855155	47.9	5.2e-43	NA	NA	NA	NA	NA	NA	NA	NA	NA
TRINITY_DN12726_c0_g2	ccp:CHC_T00008875001	71.6	2.9e-106	NA	NA	NA	NA	NA	NA	NA	NA	NA
TRINITY_DN12726_c0_g4	obr:102720872	46.2	7.9e-17	NA	NA	NA	NA	NA	NA	NA	NA	NA
TRINITY_DN12727_c0_g1	gra:105775762	100	2.6e-35	NA	NA	NA	NA	NA	NA	NA	NA	NA
TRINITY_DN12727_c0_g2	pvu:PHAVU_005G058100g	100	1.3e-40	NA	NA	NA	NA	NA	NA	NA	NA	NA
TRINITY_DN12728_c0_g1	ccp:CHC_T00005977001	29.7	4.7e-20	NA	NA	NA	NA	NA	NA	NA	NA	NA
TRINITY_DN12746_c0_g2	smo:SELMODRAFT_75998	39.5	5.3e-83	NA	NA	NA	NA	NA	NA	NA	NA	NA
TRINITY_DN12748_c0_g1	adu:107461392	100	1.2e-61	-	LOW QUALITY PROTEIN: seed linoleate 9S-lipoxygenase-2-like	K15718	linoleate 9S-lipoxygenase	EC:1.13.11.58	adu00591	Linoleic acid metabolism	Metabolism	Lipid metabolism
TRINITY_DN12748_c0_g2	adu:107461392	100	3.4e-35	-	LOW QUALITY PROTEIN: seed linoleate 9S-lipoxygenase-2-like	K15718	linoleate 9S-lipoxygenase	EC:1.13.11.58	adu00591	Linoleic acid metabolism	Metabolism	Lipid metabolism
TRINITY_DN12748_c0_g3	adu:107461392	100	7.1e-83	-	LOW QUALITY PROTEIN: seed linoleate 9S-lipoxygenase-2-like	K15718	linoleate 9S-lipoxygenase	EC:1.13.11.58	adu00591	Linoleic acid metabolism	Metabolism	Lipid metabolism
TRINITY_DN12748_c0_g4	adu:107461392	100	4.6e-47	-	LOW QUALITY PROTEIN: seed linoleate 9S-lipoxygenase-2-like	K15718	linoleate 9S-lipoxygenase	EC:1.13.11.58	adu00591	Linoleic acid metabolism	Metabolism	Lipid metabolism
TRINITY_DN12748_c0_g5	aip:107612513	99.6	3.2e-158	-	seed linoleate 9S-lipoxygenase-2 isoform X1	K15718	linoleate 9S-lipoxygenase	EC:1.13.11.58	aip00591	Linoleic acid metabolism	Metabolism	Lipid metabolism
TRINITY_DN12750_c0_g2	han:18250997	90.3	3.5e-118	atp6	ATPase subunit 6	K02126	F-type H+-transporting ATPase subunit a	-	han00190	Oxidative phosphorylation	Metabolism	Energy metabolism
TRINITY_DN12750_c0_g5	bna:4237881	97.9	1.3e-226	cob	apocytochrome b	K00412	ubiquinol-cytochrome c reductase cytochrome b subunit	-	bna00190	Oxidative phosphorylation	Metabolism	Energy metabolism
TRINITY_DN12750_c0_g9	ath:ArthCp007	100	1.6e-55	atpA	ATP synthase CF1 alpha subunit	K02111	F-type H+-transporting ATPase subunit alpha	EC:3.6.3.14	ath00190	Oxidative phosphorylation	Metabolism	Energy metabolism
TRINITY_DN12750_c0_g9	ath:ArthCp007	100	1.6e-55	atpA	ATP synthase CF1 alpha subunit	K02111	F-type H+-transporting ATPase subunit alpha	EC:3.6.3.14	ath00195	Photosynthesis	Metabolism	Energy metabolism
TRINITY_DN12752_c0_g1	bvg:104908014	36.6	4.8e-23	-	deoxycytidylate deaminase	K01493	dCMP deaminase	EC:3.5.4.12	bvg00240	Pyrimidine metabolism	Metabolism	Nucleotide metabolism
TRINITY_DN12755_c1_g5	sbi:8057550	47	1.7e-13	NA	NA	NA	NA	NA	NA	NA	NA	NA
TRINITY_DN12766_c0_g1	cic:CICLE_v10032709mg	25.4	4.1e-07	-	hypothetical protein	K08493	vesicle transport through interaction with t-SNAREs 1	-	cic04130	SNARE interactions in vesicular transport	Genetic Information Processing	Folding, sorting and degradation
TRINITY_DN12768_c0_g1	brp:103828022	41.7	2.3e-06	-	BRCA1-A complex subunit BRE	K12173	BRCA1-A complex subunit BRE	-	brp03440	Homologous recombination	Genetic Information Processing	Replication and repair
TRINITY_DN12776_c0_g1	gsl:Gasu_41700	47.7	2.2e-25	-	cytidine deaminase	K01489	cytidine deaminase	EC:3.5.4.5	gsl00240	Pyrimidine metabolism	Metabolism	Nucleotide metabolism
TRINITY_DN12783_c0_g3	mus:103997675	45.7	2.5e-26	-	isocitrate lyase	K01637	isocitrate lyase	EC:4.1.3.1	mus00630	Glyoxylate and dicarboxylate metabolism	Metabolism	Carbohydrate metabolism
TRINITY_DN12794_c0_g2	gsl:Gasu_08250	51.5	2.2e-89	NA	NA	NA	NA	NA	NA	NA	NA	NA
TRINITY_DN12799_c0_g3	mus:103973553	29.3	2.4e-19	NA	NA	NA	NA	NA	NA	NA	NA	NA
TRINITY_DN12800_c0_g1	sbi:8077724	34.3	1.1e-17	NA	NA	NA	NA	NA	NA	NA	NA	NA
TRINITY_DN12811_c0_g1	vcn:VOLCADRAFT_106071	61.8	4.8e-42	ubcA	ubiquitin conjugating enzyme E2	K10575	ubiquitin-conjugating enzyme E2 G1	EC:2.3.2.23	vcn04141	Protein processing in endoplasmic reticulum	Genetic Information Processing	Folding, sorting and degradation
TRINITY_DN12811_c0_g1	vcn:VOLCADRAFT_106071	61.8	4.8e-42	ubcA	ubiquitin conjugating enzyme E2	K10575	ubiquitin-conjugating enzyme E2 G1	EC:2.3.2.23	vcn04120	Ubiquitin mediated proteolysis	Genetic Information Processing	Folding, sorting and degradation
TRINITY_DN12818_c0_g2	csv:101220194	32	4.3e-35	NA	NA	NA	NA	NA	NA	NA	NA	NA
TRINITY_DN12838_c0_g1	bdi:104583357	52.2	5.2e-09	NA	NA	NA	NA	NA	NA	NA	NA	NA
TRINITY_DN12843_c0_g1	thj:104803003	64.2	1.5e-189	NA	NA	NA	NA	NA	NA	NA	NA	NA
TRINITY_DN12846_c0_g1	thj:104819645	37.9	5.8e-27	-	rac-like GTP-binding protein ARAC3	K04392	Ras-related C3 botulinum toxin substrate 1	-	thj04145	Phagosome	Cellular Processes	Transport and catabolism
TRINITY_DN12846_c0_g1	thj:104819645	37.9	5.8e-27	-	rac-like GTP-binding protein ARAC3	K04392	Ras-related C3 botulinum toxin substrate 1	-	thj04933	AGE-RAGE signaling pathway in diabetic complications	Human Diseases	Endocrine and metabolic diseases
TRINITY_DN12847_c0_g1	mtr:MTR_3g095810	55.6	6.3e-79	-	40S ribosomal SA-like protein	K02998	small subunit ribosomal protein SAe	-	mtr03010	Ribosome	Genetic Information Processing	Translation
TRINITY_DN12851_c0_g1	mpp:MICPUCDRAFT_42955	28.7	1.2e-12	NA	NA	NA	NA	NA	NA	NA	NA	NA
TRINITY_DN12851_c0_g2	han:110880276	34.5	3.2e-09	-	ubiquitin-like protein ATG12	K08336	ubiquitin-like protein ATG12	-	han04136	Autophagy - other eukaryotes	Cellular Processes	Transport and catabolism
TRINITY_DN12856_c0_g1	bna:106350423	86.7	6.7e-81	-	serine/threonine-protein phosphatase PP2A-2 catalytic subunit-like	K04382	serine/threonine-protein phosphatase 2A catalytic subunit	EC:3.1.3.16	bna03015	mRNA surveillance pathway	Genetic Information Processing	Translation
TRINITY_DN12856_c0_g1	bna:106350423	86.7	6.7e-81	-	serine/threonine-protein phosphatase PP2A-2 catalytic subunit-like	K04382	serine/threonine-protein phosphatase 2A catalytic subunit	EC:3.1.3.16	bna04136	Autophagy - other eukaryotes	Cellular Processes	Transport and catabolism
TRINITY_DN12857_c0_g1	gsl:Gasu_27920	66.8	1.1e-83	-	20S proteasome subunit alpha 2	K02726	20S proteasome subunit alpha 2	EC:3.4.25.1	gsl03050	Proteasome	Genetic Information Processing	Folding, sorting and degradation
TRINITY_DN12859_c0_g1	apro:F751_0758	31.5	7.7e-22	NA	NA	NA	NA	NA	NA	NA	NA	NA
TRINITY_DN12866_c0_g1	mng:MNEG_0429	55	5.9e-132	-	histidyl-tRNA synthetase	K01892	histidyl-tRNA synthetase	EC:6.1.1.21	mng00970	Aminoacyl-tRNA biosynthesis	Genetic Information Processing	Translation
TRINITY_DN12869_c0_g1	ccaj:109802094	77.8	5.5e-62	NA	NA	NA	NA	NA	NA	NA	NA	NA
TRINITY_DN12871_c0_g2	smo:SELMODRAFT_132602	35	4.4e-27	NA	NA	NA	NA	NA	NA	NA	NA	NA
TRINITY_DN12882_c0_g1	nnu:104611303	40.3	7.8e-08	NA	NA	NA	NA	NA	NA	NA	NA	NA
TRINITY_DN12886_c0_g1	smo:SELMODRAFT_270727	35.8	7.3e-42	-	hypothetical protein	K01590	histidine decarboxylase	EC:4.1.1.22	smo00340	Histidine metabolism	Metabolism	Amino acid metabolism
TRINITY_DN12886_c0_g2	smo:SELMODRAFT_402512	40.8	3.7e-58	-	hypothetical protein	K01590	histidine decarboxylase	EC:4.1.1.22	smo00340	Histidine metabolism	Metabolism	Amino acid metabolism
TRINITY_DN12889_c0_g1	cvr:CHLNCDRAFT_34102	45.7	9.1e-84	-	hypothetical protein	K10808	ribonucleoside-diphosphate reductase subunit M2	EC:1.17.4.1	cvr00230	Purine metabolism	Metabolism	Nucleotide metabolism
TRINITY_DN12889_c0_g1	cvr:CHLNCDRAFT_34102	45.7	9.1e-84	-	hypothetical protein	K10808	ribonucleoside-diphosphate reductase subunit M2	EC:1.17.4.1	cvr00240	Pyrimidine metabolism	Metabolism	Nucleotide metabolism
TRINITY_DN12889_c0_g1	cvr:CHLNCDRAFT_34102	45.7	9.1e-84	-	hypothetical protein	K10808	ribonucleoside-diphosphate reductase subunit M2	EC:1.17.4.1	cvr00480	Glutathione metabolism	Metabolism	Metabolism of other amino acids
TRINITY_DN12892_c0_g1	sot:102578812	79.6	1.3e-211	-	NADH dehydrogenase [ubiquinone] flavoprotein 1	K03942	NADH dehydrogenase (ubiquinone) flavoprotein 1	EC:1.6.5.3 1.6.99.3	sot00190	Oxidative phosphorylation	Metabolism	Energy metabolism
TRINITY_DN12908_c0_g1	aip:107613674	54.7	9.6e-125	NA	NA	NA	NA	NA	NA	NA	NA	NA
TRINITY_DN12912_c0_g1	ccp:CHC_T00009333001	56.3	7.3e-65	-	NUOE homolog	K03943	NADH dehydrogenase (ubiquinone) flavoprotein 2	EC:1.6.5.3 1.6.99.3	ccp00190	Oxidative phosphorylation	Metabolism	Energy metabolism
TRINITY_DN12912_c1_g1	csv:101221712	49.6	1.7e-26	-	probable bifunctional methylthioribulose-1-phosphate dehydratase/enolase-phosphatase E1 1	K16054	methylthioribulose 1-phosphate dehydratase / enolase-phosphatase E1	EC:4.2.1.109 3.1.3.77	csv00270	Cysteine and methionine metabolism	Metabolism	Amino acid metabolism
TRINITY_DN12915_c0_g3	csat:104773531	49.1	9.1e-38	NA	NA	NA	NA	NA	NA	NA	NA	NA
TRINITY_DN12916_c0_g1	csl:COCSUDRAFT_53751	49.2	6.2e-45	NA	NA	NA	NA	NA	NA	NA	NA	NA
TRINITY_DN12920_c0_g1	gsl:Gasu_30700	72.6	1.3e-30	-	AAA-type ATPase	K12196	vacuolar protein-sorting-associated protein 4	-	gsl04144	Endocytosis	Cellular Processes	Transport and catabolism
TRINITY_DN12924_c0_g1	nnu:104587382	37.4	1.9e-31	-	probable FAD synthase	K00953	FAD synthetase	EC:2.7.7.2	nnu00740	Riboflavin metabolism	Metabolism	Metabolism of cofactors and vitamins
TRINITY_DN12925_c0_g1	cme:CYME_CMT103C	43	9.1e-20	-	probable glutathione-S-transferase	K00799	glutathione S-transferase	EC:2.5.1.18	cme00480	Glutathione metabolism	Metabolism	Metabolism of other amino acids
TRINITY_DN12933_c0_g1	cme:CYME_CMB015C	60.4	2.4e-50	-	probable ubiquitin-conjugating enzyme E2	K20217	ubiquitin-conjugating enzyme E2 E	EC:2.3.2.23	cme04120	Ubiquitin mediated proteolysis	Genetic Information Processing	Folding, sorting and degradation
TRINITY_DN12938_c0_g1	olu:OSTLU_40610	62.9	8.7e-47	-	predicted protein	K11827	AP-2 complex subunit sigma-1	-	olu04144	Endocytosis	Cellular Processes	Transport and catabolism
TRINITY_DN12939_c0_g1	atr:18441901	41.7	3.1e-55	NA	NA	NA	NA	NA	NA	NA	NA	NA
TRINITY_DN12939_c0_g3	gra:105785546	65.1	5.2e-55	NA	NA	NA	NA	NA	NA	NA	NA	NA
TRINITY_DN12940_c0_g1	osa:4344432	28.3	5.6e-07	NA	NA	NA	NA	NA	NA	NA	NA	NA
TRINITY_DN12958_c0_g1	cme:CYME_CMT433C	36.8	3.2e-30	NA	NA	NA	NA	NA	NA	NA	NA	NA
TRINITY_DN12963_c0_g2	dct:110098906	23.7	5.6e-20	-	putative amidase C869.01	K01426	amidase	EC:3.5.1.4	dct00330	Arginine and proline metabolism	Metabolism	Amino acid metabolism
TRINITY_DN12963_c0_g2	dct:110098906	23.7	5.6e-20	-	putative amidase C869.01	K01426	amidase	EC:3.5.1.4	dct00360	Phenylalanine metabolism	Metabolism	Amino acid metabolism
TRINITY_DN12963_c0_g2	dct:110098906	23.7	5.6e-20	-	putative amidase C869.01	K01426	amidase	EC:3.5.1.4	dct00380	Tryptophan metabolism	Metabolism	Amino acid metabolism
TRINITY_DN12972_c0_g4	ccp:CHC_T00010047001	68	3.5e-43	-	40S ribosomal protein S17	K02962	small subunit ribosomal protein S17e	-	ccp03010	Ribosome	Genetic Information Processing	Translation
TRINITY_DN12973_c0_g1	cann:107840853	77.2	1.9e-190	-	eukaryotic peptide chain release factor subunit 1-3	K03265	peptide chain release factor subunit 1	-	cann03015	mRNA surveillance pathway	Genetic Information Processing	Translation
TRINITY_DN13003_c0_g3	fve:101290911	50.3	1.9e-93	NA	NA	NA	NA	NA	NA	NA	NA	NA
TRINITY_DN1300_c0_g1	adu:107486435	100	2.8e-38	-	40S ribosomal protein S21-2	K02971	small subunit ribosomal protein S21e	-	adu03010	Ribosome	Genetic Information Processing	Translation
TRINITY_DN13019_c0_g1	cme:CYME_CMR237C	32.7	2.7e-42	-	threonine 3-dehydrogenas	K00060	threonine 3-dehydrogenase	EC:1.1.1.103	cme00260	Glycine, serine and threonine metabolism	Metabolism	Amino acid metabolism
TRINITY_DN13020_c0_g1	egu:105057732	67.4	2.3e-204	NA	NA	NA	NA	NA	NA	NA	NA	NA
TRINITY_DN13023_c0_g1	ghi:107948690	42.9	4e-33	NA	NA	NA	NA	NA	NA	NA	NA	NA
TRINITY_DN13024_c0_g1	cit:102628538	36.5	5.1e-39	NA	NA	NA	NA	NA	NA	NA	NA	NA
TRINITY_DN13026_c0_g1	cit:102608137	56.1	1.9e-15	NA	NA	NA	NA	NA	NA	NA	NA	NA
TRINITY_DN13027_c1_g1	cme:CYME_CMK186C	37.5	5.4e-28	NA	NA	NA	NA	NA	NA	NA	NA	NA
TRINITY_DN13032_c0_g1	mis:MICPUN_79721	69	8e-32	-	predicted protein	K12832	splicing factor 3B subunit 5	-	mis03040	Spliceosome	Genetic Information Processing	Transcription
TRINITY_DN13033_c0_g1	cvr:CHLNCDRAFT_58754	27.1	7.2e-15	NA	NA	NA	NA	NA	NA	NA	NA	NA
TRINITY_DN13034_c0_g1	jcu:105637022	70	1.3e-08	NA	NA	NA	NA	NA	NA	NA	NA	NA
TRINITY_DN13038_c0_g1	cam:101513316	46.8	1.4e-25	NA	NA	NA	NA	NA	NA	NA	NA	NA
TRINITY_DN13040_c0_g1	pvu:PHAVU_003G129500g	39.8	5.2e-34	NA	NA	NA	NA	NA	NA	NA	NA	NA
TRINITY_DN13042_c1_g3	zma:100280697	43.9	8.5e-55	NA	NA	NA	NA	NA	NA	NA	NA	NA
TRINITY_DN13043_c0_g3	sbi:8057079	71.6	7.2e-43	-	splicing factor 3B subunit 6-like protein	K12833	pre-mRNA branch site protein p14	-	sbi03040	Spliceosome	Genetic Information Processing	Transcription
TRINITY_DN13045_c0_g1	zju:107425249	72.3	4.6e-139	NA	NA	NA	NA	NA	NA	NA	NA	NA
TRINITY_DN13045_c0_g2	rcu:8276811	52.3	9.9e-51	-	RNA polymerase II subunit A C-terminal domain phosphatase SSU72	K15544	RNA polymerase II subunit A C-terminal domain phosphatase SSU72	EC:3.1.3.16	rcu03015	mRNA surveillance pathway	Genetic Information Processing	Translation
TRINITY_DN13048_c0_g1	zma:100285220	39.1	5.7e-33	NA	NA	NA	NA	NA	NA	NA	NA	NA
TRINITY_DN13054_c0_g1	zju:107419247	67.8	6.6e-26	-	malate dehydrogenase	K00026	malate dehydrogenase	EC:1.1.1.37	zju00020	Citrate cycle (TCA cycle)	Metabolism	Carbohydrate metabolism
TRINITY_DN13054_c0_g1	zju:107419247	67.8	6.6e-26	-	malate dehydrogenase	K00026	malate dehydrogenase	EC:1.1.1.37	zju00620	Pyruvate metabolism	Metabolism	Carbohydrate metabolism
TRINITY_DN13054_c0_g1	zju:107419247	67.8	6.6e-26	-	malate dehydrogenase	K00026	malate dehydrogenase	EC:1.1.1.37	zju00630	Glyoxylate and dicarboxylate metabolism	Metabolism	Carbohydrate metabolism
TRINITY_DN13054_c0_g1	zju:107419247	67.8	6.6e-26	-	malate dehydrogenase	K00026	malate dehydrogenase	EC:1.1.1.37	zju00710	Carbon fixation in photosynthetic organisms	Metabolism	Energy metabolism
TRINITY_DN13054_c0_g1	zju:107419247	67.8	6.6e-26	-	malate dehydrogenase	K00026	malate dehydrogenase	EC:1.1.1.37	zju00270	Cysteine and methionine metabolism	Metabolism	Amino acid metabolism
TRINITY_DN13055_c0_g1	egr:104421085	38.8	3.1e-85	NA	NA	NA	NA	NA	NA	NA	NA	NA
TRINITY_DN13064_c0_g1	cre:CHLREDRAFT_191206	35.2	3.4e-33	-	predicted protein	K00799	glutathione S-transferase	EC:2.5.1.18	cre00480	Glutathione metabolism	Metabolism	Metabolism of other amino acids
TRINITY_DN13066_c0_g1	csl:COCSUDRAFT_16077	30.1	1.1e-32	-	alpha/beta-hydrolase	K01054	acylglycerol lipase	EC:3.1.1.23	csl00561	Glycerolipid metabolism	Metabolism	Lipid metabolism
TRINITY_DN13076_c0_g1	smo:SELMODRAFT_269263	38.7	1.1e-66	NA	NA	NA	NA	NA	NA	NA	NA	NA
TRINITY_DN13080_c0_g1	gsl:Gasu_26800	45.9	4.7e-39	-	3-hydroxyanthranilate 3	K00452	3-hydroxyanthranilate 3,4-dioxygenase	EC:1.13.11.6	gsl00380	Tryptophan metabolism	Metabolism	Amino acid metabolism
TRINITY_DN13084_c0_g1	atr:18428683	72.5	2.8e-65	-	60S ribosomal protein L19-3	K02885	large subunit ribosomal protein L19e	-	atr03010	Ribosome	Genetic Information Processing	Translation
TRINITY_DN13095_c0_g1	cvr:CHLNCDRAFT_145468	41.3	2.2e-55	NA	NA	NA	NA	NA	NA	NA	NA	NA
TRINITY_DN13096_c0_g15	bvg:809558	100	2.1e-38	nad5	NADH dehydrogenase subunit 5	K03883	NADH-ubiquinone oxidoreductase chain 5	EC:1.6.5.3	bvg00190	Oxidative phosphorylation	Metabolism	Energy metabolism
TRINITY_DN13096_c0_g7	bna:4237891	100	2.8e-48	nad5	NADH dehydrogenase subunit 5	K03883	NADH-ubiquinone oxidoreductase chain 5	EC:1.6.5.3	bna00190	Oxidative phosphorylation	Metabolism	Energy metabolism
TRINITY_DN13097_c0_g1	lang:109332030	68.3	5e-51	-	60S ribosomal protein L27a-3	K02900	large subunit ribosomal protein L27Ae	-	lang03010	Ribosome	Genetic Information Processing	Translation
TRINITY_DN13099_c0_g1	pda:103705902	33.1	1.4e-13	NA	NA	NA	NA	NA	NA	NA	NA	NA
TRINITY_DN1309_c0_g1	cvr:CHLNCDRAFT_133342	95.7	2.6e-33	-	hypothetical protein	K02922	large subunit ribosomal protein L37e	-	cvr03010	Ribosome	Genetic Information Processing	Translation
TRINITY_DN13103_c0_g2	egr:104456874	28.1	2.3e-10	NA	NA	NA	NA	NA	NA	NA	NA	NA
TRINITY_DN13103_c0_g3	osa:4342413	39.8	7.2e-26	NA	NA	NA	NA	NA	NA	NA	NA	NA
TRINITY_DN13104_c0_g1	ghi:107934526	35.9	2.6e-40	-	purple acid phosphatase 8-like	K14379	tartrate-resistant acid phosphatase type 5	EC:3.1.3.2	ghi00740	Riboflavin metabolism	Metabolism	Metabolism of cofactors and vitamins
TRINITY_DN13105_c0_g1	atr:18441319	47.9	1.2e-25	-	transcription initiation factor TFIID subunit 12 isoform X2	K03126	transcription initiation factor TFIID subunit 12	-	atr03022	Basal transcription factors	Genetic Information Processing	Transcription
TRINITY_DN13105_c0_g2	cit:102617721	29.6	1.6e-13	NA	NA	NA	NA	NA	NA	NA	NA	NA
TRINITY_DN13122_c0_g2	egr:104452745	28.6	5.3e-12	NA	NA	NA	NA	NA	NA	NA	NA	NA
TRINITY_DN13127_c0_g1	bdi:100833829	75.4	7.9e-26	NA	NA	NA	NA	NA	NA	NA	NA	NA
TRINITY_DN13129_c0_g1	gsl:Gasu_25060	31.3	2.8e-15	-	peroxisomal membrane MPV17/PMP22-like protein	K13347	peroxisomal membrane protein 2	-	gsl04146	Peroxisome	Cellular Processes	Transport and catabolism
TRINITY_DN13132_c0_g2	csl:COCSUDRAFT_53012	72	4.3e-192	NA	NA	NA	NA	NA	NA	NA	NA	NA
TRINITY_DN13134_c0_g1	pxb:103967656	44.6	3.5e-75	NA	NA	NA	NA	NA	NA	NA	NA	NA
TRINITY_DN13144_c0_g2	osa:4338999	28.2	2.9e-11	NA	NA	NA	NA	NA	NA	NA	NA	NA
TRINITY_DN13145_c0_g1	atr:18432531	32	7.2e-29	-	cyclin-H1-1	K06634	cyclin H	-	atr03022	Basal transcription factors	Genetic Information Processing	Transcription
TRINITY_DN13145_c0_g1	atr:18432531	32	7.2e-29	-	cyclin-H1-1	K06634	cyclin H	-	atr03420	Nucleotide excision repair	Genetic Information Processing	Replication and repair
TRINITY_DN13145_c0_g2	pavi:110765119	39.3	2.3e-16	-	protein DJ-1 homolog D-like	K18881	D-lactate dehydratase	EC:4.2.1.130	pavi00620	Pyruvate metabolism	Metabolism	Carbohydrate metabolism
TRINITY_DN13150_c0_g1	bvg:104898158	37.5	3.3e-07	NA	NA	NA	NA	NA	NA	NA	NA	NA
TRINITY_DN13150_c1_g1	aly:ARALYDRAFT_326421	34.3	4.5e-34	NA	NA	NA	NA	NA	NA	NA	NA	NA
TRINITY_DN13157_c1_g1	obr:102716532	40.2	1.3e-15	NA	NA	NA	NA	NA	NA	NA	NA	NA
TRINITY_DN13159_c0_g2	mpp:MICPUCDRAFT_21083	62.2	4.5e-45	-	hypothetical protein	K10578	ubiquitin-conjugating enzyme E2 J1	EC:2.3.2.23	mpp04141	Protein processing in endoplasmic reticulum	Genetic Information Processing	Folding, sorting and degradation
TRINITY_DN13159_c0_g2	mpp:MICPUCDRAFT_21083	62.2	4.5e-45	-	hypothetical protein	K10578	ubiquitin-conjugating enzyme E2 J1	EC:2.3.2.23	mpp04120	Ubiquitin mediated proteolysis	Genetic Information Processing	Folding, sorting and degradation
TRINITY_DN13161_c0_g1	mdm:103448340	27.4	2.1e-21	NA	NA	NA	NA	NA	NA	NA	NA	NA
TRINITY_DN13166_c0_g1	nto:104095052	39.5	2.7e-38	-	glutathione S-transferase T1-like	K00799	glutathione S-transferase	EC:2.5.1.18	nto00480	Glutathione metabolism	Metabolism	Metabolism of other amino acids
TRINITY_DN13166_c0_g2	nta:107808179	80.7	3.2e-33	-	40S ribosomal protein S27-2	K02978	small subunit ribosomal protein S27e	-	nta03010	Ribosome	Genetic Information Processing	Translation
TRINITY_DN13167_c0_g1	cre:CHLREDRAFT_185392	51.6	2.3e-25	NA	NA	NA	NA	NA	NA	NA	NA	NA
TRINITY_DN13171_c1_g1	gsl:Gasu_57670	39.5	1.4e-21	NA	NA	NA	NA	NA	NA	NA	NA	NA
TRINITY_DN13176_c0_g1	apro:F751_2766	30.4	5.1e-07	NA	NA	NA	NA	NA	NA	NA	NA	NA
TRINITY_DN13177_c0_g1	csl:COCSUDRAFT_48977	66.1	7.3e-30	NA	NA	NA	NA	NA	NA	NA	NA	NA
TRINITY_DN13179_c0_g1	jcu:105633040	65.9	2.7e-75	-	40S ribosomal protein S8	K02995	small subunit ribosomal protein S8e	-	jcu03010	Ribosome	Genetic Information Processing	Translation
TRINITY_DN1317_c0_g1	brp:103861081	41.5	4.8e-06	-	50S ribosomal protein L30-like	K02907	large subunit ribosomal protein L30	-	brp03010	Ribosome	Genetic Information Processing	Translation
TRINITY_DN13180_c0_g1	cmo:103487185	47.8	1.8e-103	-	dnaJ protein homolog	K09503	DnaJ homolog subfamily A member 2	-	cmo04141	Protein processing in endoplasmic reticulum	Genetic Information Processing	Folding, sorting and degradation
TRINITY_DN13185_c0_g3	pxb:103942596	53.4	6.1e-48	-	actin-related protein 2/3 complex subunit 3-like	K05756	actin related protein 2/3 complex, subunit 3	-	pxb04144	Endocytosis	Cellular Processes	Transport and catabolism
TRINITY_DN13187_c0_g1	cre:CHLREDRAFT_195895	32.7	7.4e-54	RB60	protein disulfide isomerase 1	K09580	protein disulfide-isomerase A1	EC:5.3.4.1	cre04141	Protein processing in endoplasmic reticulum	Genetic Information Processing	Folding, sorting and degradation
TRINITY_DN13192_c0_g1	sita:101778367	31.3	8.3e-17	NA	NA	NA	NA	NA	NA	NA	NA	NA
TRINITY_DN13198_c0_g1	osa:4346976	28.3	8.3e-09	NA	NA	NA	NA	NA	NA	NA	NA	NA
TRINITY_DN13205_c0_g1	cann:107850529	48.6	5.4e-23	NA	NA	NA	NA	NA	NA	NA	NA	NA
TRINITY_DN13209_c0_g1	mdm:103419610	52.2	1.1e-101	-	aminomethyltransferase	K00605	aminomethyltransferase	EC:2.1.2.10	mdm00630	Glyoxylate and dicarboxylate metabolism	Metabolism	Carbohydrate metabolism
TRINITY_DN13209_c0_g1	mdm:103419610	52.2	1.1e-101	-	aminomethyltransferase	K00605	aminomethyltransferase	EC:2.1.2.10	mdm00260	Glycine, serine and threonine metabolism	Metabolism	Amino acid metabolism
TRINITY_DN13209_c0_g1	mdm:103419610	52.2	1.1e-101	-	aminomethyltransferase	K00605	aminomethyltransferase	EC:2.1.2.10	mdm00670	One carbon pool by folate	Metabolism	Metabolism of cofactors and vitamins
TRINITY_DN13215_c0_g1	mpp:MICPUCDRAFT_22366	58.7	1.4e-70	-	hypothetical protein	K07562	nonsense-mediated mRNA decay protein 3	-	mpp03013	RNA transport	Genetic Information Processing	Translation
TRINITY_DN13215_c0_g1	mpp:MICPUCDRAFT_22366	58.7	1.4e-70	-	hypothetical protein	K07562	nonsense-mediated mRNA decay protein 3	-	mpp03008	Ribosome biogenesis in eukaryotes	Genetic Information Processing	Translation
TRINITY_DN13217_c0_g2	nta:107791728	31.7	2e-22	NA	NA	NA	NA	NA	NA	NA	NA	NA
TRINITY_DN13217_c0_g3	mpp:MICPUCDRAFT_54753	42.8	6.9e-31	NA	NA	NA	NA	NA	NA	NA	NA	NA
TRINITY_DN13219_c0_g2	vvi:100251852	41.5	2.5e-27	-	probable calcium-binding protein CML48	K13448	calcium-binding protein CML	-	vvi04626	Plant-pathogen interaction	Organismal Systems	Environmental adaptation
TRINITY_DN13225_c0_g1	zma:542260	63.1	6.5e-25	sod2	superoxide dismutase [Cu-Zn] 2	K04565	superoxide dismutase, Cu-Zn family	EC:1.15.1.1	zma04146	Peroxisome	Cellular Processes	Transport and catabolism
TRINITY_DN13225_c0_g3	fve:101307336	65.7	8.5e-22	-	superoxide dismutase [Cu-Zn]	K04565	superoxide dismutase, Cu-Zn family	EC:1.15.1.1	fve04146	Peroxisome	Cellular Processes	Transport and catabolism
TRINITY_DN13225_c0_g4	cpap:110809679	73.6	2.2e-16	-	superoxide dismutase [Cu-Zn]	K04565	superoxide dismutase, Cu-Zn family	EC:1.15.1.1	cpap04146	Peroxisome	Cellular Processes	Transport and catabolism
TRINITY_DN13228_c0_g1	adu:107460251	50.9	4.9e-39	-	ornithine decarboxylase-like	K01581	ornithine decarboxylase	EC:4.1.1.17	adu00330	Arginine and proline metabolism	Metabolism	Amino acid metabolism
TRINITY_DN13228_c0_g1	adu:107460251	50.9	4.9e-39	-	ornithine decarboxylase-like	K01581	ornithine decarboxylase	EC:4.1.1.17	adu00480	Glutathione metabolism	Metabolism	Metabolism of other amino acids
TRINITY_DN13233_c0_g2	vcn:VOLCADRAFT_78311	53.3	3.4e-103	NA	NA	NA	NA	NA	NA	NA	NA	NA
TRINITY_DN13236_c0_g1	zju:107413593	49.4	6.9e-15	-	serine/arginine-rich splicing factor RS2Z32-like isoform X1	K12896	splicing factor, arginine/serine-rich 7	-	zju03040	Spliceosome	Genetic Information Processing	Transcription
TRINITY_DN13247_c0_g1	cme:CYME_CMP152C	60.1	1.1e-87	-	cytochrome c reductase cytochrome c1 subunit	K00413	ubiquinol-cytochrome c reductase cytochrome c1 subunit	-	cme00190	Oxidative phosphorylation	Metabolism	Energy metabolism
TRINITY_DN13248_c0_g2	zma:100278614	33.3	2.7e-15	NA	NA	NA	NA	NA	NA	NA	NA	NA
TRINITY_DN13249_c2_g9	gsl:Gasu_33260	71	1.9e-33	NA	NA	NA	NA	NA	NA	NA	NA	NA
TRINITY_DN13251_c0_g1	cme:CYME_CMQ211C	39.9	1.6e-85	-	adenylosuccinate lyase	K01756	adenylosuccinate lyase	EC:4.3.2.2	cme00230	Purine metabolism	Metabolism	Nucleotide metabolism
TRINITY_DN13251_c0_g1	cme:CYME_CMQ211C	39.9	1.6e-85	-	adenylosuccinate lyase	K01756	adenylosuccinate lyase	EC:4.3.2.2	cme00250	Alanine, aspartate and glutamate metabolism	Metabolism	Amino acid metabolism
TRINITY_DN13260_c0_g1	ini:109188333	87.3	1e-87	NA	NA	NA	NA	NA	NA	NA	NA	NA
TRINITY_DN13261_c0_g1	cvr:CHLNCDRAFT_35098	44.3	6.6e-49	-	hypothetical protein	K01052	lysosomal acid lipase/cholesteryl ester hydrolase	EC:3.1.1.13	cvr00100	Steroid biosynthesis	Metabolism	Lipid metabolism
TRINITY_DN13263_c0_g1	mng:MNEG_4925	47.7	9.3e-24	NA	NA	NA	NA	NA	NA	NA	NA	NA
TRINITY_DN13266_c0_g1	gra:105772959	65.2	2.2e-35	-	probable eukaryotic translation initiation factor 5-1	K03262	translation initiation factor 5	-	gra03013	RNA transport	Genetic Information Processing	Translation
TRINITY_DN13273_c0_g1	han:110872317	33	1.1e-43	-	elongation factor-like GTPase 1	K14536	ribosome assembly protein 1	EC:3.6.5.-	han03008	Ribosome biogenesis in eukaryotes	Genetic Information Processing	Translation
TRINITY_DN13274_c0_g1	nta:107784991	31.4	2.3e-10	NA	NA	NA	NA	NA	NA	NA	NA	NA
TRINITY_DN13282_c0_g2	cmo:103485527	61.2	6.9e-115	-	mannose-1-phosphate guanylyltransferase 1	K00966	mannose-1-phosphate guanylyltransferase	EC:2.7.7.13	cmo00051	Fructose and mannose metabolism	Metabolism	Carbohydrate metabolism
TRINITY_DN13282_c0_g2	cmo:103485527	61.2	6.9e-115	-	mannose-1-phosphate guanylyltransferase 1	K00966	mannose-1-phosphate guanylyltransferase	EC:2.7.7.13	cmo00520	Amino sugar and nucleotide sugar metabolism	Metabolism	Carbohydrate metabolism
TRINITY_DN13287_c0_g1	cre:CHLREDRAFT_148836	86.7	2.9e-88	NA	NA	NA	NA	NA	NA	NA	NA	NA
TRINITY_DN13290_c0_g1	csl:COCSUDRAFT_31111	41.9	4.2e-12	NA	NA	NA	NA	NA	NA	NA	NA	NA
TRINITY_DN13296_c0_g3	mng:MNEG_5690	42.6	4e-57	NA	NA	NA	NA	NA	NA	NA	NA	NA
TRINITY_DN13303_c1_g1	pxb:103939751	78.8	3e-122	-	serine/threonine-protein phosphatase PP1 isoform X1	K06269	serine/threonine-protein phosphatase PP1 catalytic subunit	EC:3.1.3.16	pxb03015	mRNA surveillance pathway	Genetic Information Processing	Translation
TRINITY_DN13303_c1_g3	mng:MNEG_8172	45.1	2.3e-79	-	sulfide quinone reductase-like protein	K22470	eukaryotic sulfide quinone oxidoreductase	EC:1.8.5.8	mng00920	Sulfur metabolism	Metabolism	Energy metabolism
TRINITY_DN13307_c0_g1	lja:Lj1g3v3328900.1	40	3.2e-97	NA	NA	NA	NA	NA	NA	NA	NA	NA
TRINITY_DN13316_c0_g8	ats:109744006	47.5	7.1e-08	NA	NA	NA	NA	NA	NA	NA	NA	NA
TRINITY_DN13324_c0_g1	atr:18447585	41.5	3.4e-50	-	phosphoglycolate phosphatase 2 isoform X1	K19269	phosphoglycolate phosphatase	EC:3.1.3.18 3.1.3.48	atr00630	Glyoxylate and dicarboxylate metabolism	Metabolism	Carbohydrate metabolism
TRINITY_DN13325_c0_g1	ini:109147095	31	1.4e-37	NA	NA	NA	NA	NA	NA	NA	NA	NA
TRINITY_DN13333_c1_g1	csl:COCSUDRAFT_47198	27.9	2.5e-18	NA	NA	NA	NA	NA	NA	NA	NA	NA
TRINITY_DN13333_c2_g2	gsl:Gasu_09420	37.8	3.2e-43	NA	NA	NA	NA	NA	NA	NA	NA	NA
TRINITY_DN13333_c3_g2	cvr:CHLNCDRAFT_13270	53.2	3.1e-13	-	hypothetical protein	K11863	Ataxin-3	EC:3.4.22.-	cvr04141	Protein processing in endoplasmic reticulum	Genetic Information Processing	Folding, sorting and degradation
TRINITY_DN13336_c0_g1	gsl:Gasu_30930	38.6	1.2e-20	NA	NA	NA	NA	NA	NA	NA	NA	NA
TRINITY_DN13337_c0_g1	bvg:104884313	39.4	3.6e-21	-	hypothetical protein isoform A	K03538	ribonuclease P protein subunit POP4	EC:3.1.26.5	bvg03013	RNA transport	Genetic Information Processing	Translation
TRINITY_DN13337_c0_g1	bvg:104884313	39.4	3.6e-21	-	hypothetical protein isoform A	K03538	ribonuclease P protein subunit POP4	EC:3.1.26.5	bvg03008	Ribosome biogenesis in eukaryotes	Genetic Information Processing	Translation
TRINITY_DN13337_c0_g2	pavi:110747341	25.7	7.5e-12	NA	NA	NA	NA	NA	NA	NA	NA	NA
TRINITY_DN13338_c0_g1	egu:105050866	45.5	9.3e-126	-	7-dehydrocholesterol reductase	K00213	7-dehydrocholesterol reductase	EC:1.3.1.21	egu00100	Steroid biosynthesis	Metabolism	Lipid metabolism
TRINITY_DN13340_c1_g2	egr:108958286	30.8	2.1e-07	NA	NA	NA	NA	NA	NA	NA	NA	NA
TRINITY_DN13347_c0_g1	mdm:103424904	38.1	9.8e-24	-	probable enoyl-CoA hydratase 2	K05607	methylglutaconyl-CoA hydratase	EC:4.2.1.18	mdm00280	Valine, leucine and isoleucine degradation	Metabolism	Amino acid metabolism
TRINITY_DN13350_c0_g1	vcn:VOLCADRAFT_30475	34.4	1.7e-19	NA	NA	NA	NA	NA	NA	NA	NA	NA
TRINITY_DN13354_c0_g6	rcu:8270758	31.5	1.9e-23	-	inosine-5'-monophosphate dehydrogenase 2	K00088	IMP dehydrogenase	EC:1.1.1.205	rcu00230	Purine metabolism	Metabolism	Nucleotide metabolism
TRINITY_DN13354_c0_g7	egu:105046440	29.8	2.5e-22	NA	NA	NA	NA	NA	NA	NA	NA	NA
TRINITY_DN13358_c0_g1	bna:111200978	47.6	1.9e-18	NA	NA	NA	NA	NA	NA	NA	NA	NA
TRINITY_DN13361_c0_g1	adu:107478858	100	8.4e-70	-	glyceraldehyde-3-phosphate dehydrogenase GAPC2	K00134	glyceraldehyde 3-phosphate dehydrogenase	EC:1.2.1.12	adu00010	Glycolysis / Gluconeogenesis	Metabolism	Carbohydrate metabolism
TRINITY_DN13361_c0_g1	adu:107478858	100	8.4e-70	-	glyceraldehyde-3-phosphate dehydrogenase GAPC2	K00134	glyceraldehyde 3-phosphate dehydrogenase	EC:1.2.1.12	adu00710	Carbon fixation in photosynthetic organisms	Metabolism	Energy metabolism
TRINITY_DN13361_c0_g3	adu:107468929	100	5.2e-33	-	glyceraldehyde-3-phosphate dehydrogenase GAPC2	K00134	glyceraldehyde 3-phosphate dehydrogenase	EC:1.2.1.12	adu00010	Glycolysis / Gluconeogenesis	Metabolism	Carbohydrate metabolism
TRINITY_DN13361_c0_g3	adu:107468929	100	5.2e-33	-	glyceraldehyde-3-phosphate dehydrogenase GAPC2	K00134	glyceraldehyde 3-phosphate dehydrogenase	EC:1.2.1.12	adu00710	Carbon fixation in photosynthetic organisms	Metabolism	Energy metabolism
TRINITY_DN13362_c0_g1	cann:107878812	35.5	1.2e-09	-	nicotinamide/nicotinic acid mononucleotide adenylyltransferase-like	K06210	nicotinamide mononucleotide adenylyltransferase	EC:2.7.7.1 2.7.7.18	cann00760	Nicotinate and nicotinamide metabolism	Metabolism	Metabolism of cofactors and vitamins
TRINITY_DN13363_c0_g1	ccaj:109814504	42.8	3e-36	NA	NA	NA	NA	NA	NA	NA	NA	NA
TRINITY_DN13365_c0_g2	dosa:Os05t0554400-01	36.5	3.5e-72	Os05g0554400	Phosphatidyl serine synthase family protein.	K08730	phosphatidylserine synthase 2	EC:2.7.8.29	dosa00564	Glycerophospholipid metabolism	Metabolism	Lipid metabolism
TRINITY_DN13366_c0_g1	lja:Lj0g3v0343689.3	30.2	8e-09	NA	NA	NA	NA	NA	NA	NA	NA	NA
TRINITY_DN13369_c1_g1	sbi:8063307	35.1	3.9e-64	NA	NA	NA	NA	NA	NA	NA	NA	NA
TRINITY_DN13369_c1_g5	mtr:MTR_8g076060	41.8	2.5e-30	NA	NA	NA	NA	NA	NA	NA	NA	NA
TRINITY_DN13369_c1_g6	mng:MNEG_3705	74.2	3.2e-20	-	H/ACA ribonucleoprotein complex subunit 3	K11130	H/ACA ribonucleoprotein complex subunit 3	-	mng03008	Ribosome biogenesis in eukaryotes	Genetic Information Processing	Translation
TRINITY_DN13375_c0_g1	mis:MICPUN_58288	43.8	1e-15	NA	NA	NA	NA	NA	NA	NA	NA	NA
TRINITY_DN13375_c0_g4	smo:SELMODRAFT_445437	32.3	1.3e-67	NA	NA	NA	NA	NA	NA	NA	NA	NA
TRINITY_DN13377_c0_g3	smo:SELMODRAFT_61474	44.2	1.2e-137	-	hypothetical protein	K12309	beta-galactosidase	EC:3.2.1.23	smo00052	Galactose metabolism	Metabolism	Carbohydrate metabolism
TRINITY_DN13377_c0_g3	smo:SELMODRAFT_61474	44.2	1.2e-137	-	hypothetical protein	K12309	beta-galactosidase	EC:3.2.1.23	smo00600	Sphingolipid metabolism	Metabolism	Lipid metabolism
TRINITY_DN13377_c0_g3	smo:SELMODRAFT_61474	44.2	1.2e-137	-	hypothetical protein	K12309	beta-galactosidase	EC:3.2.1.23	smo00531	Glycosaminoglycan degradation	Metabolism	Glycan biosynthesis and metabolism
TRINITY_DN13377_c0_g3	smo:SELMODRAFT_61474	44.2	1.2e-137	-	hypothetical protein	K12309	beta-galactosidase	EC:3.2.1.23	smo00604	Glycosphingolipid biosynthesis - ganglio series	Metabolism	Glycan biosynthesis and metabolism
TRINITY_DN13377_c0_g3	smo:SELMODRAFT_61474	44.2	1.2e-137	-	hypothetical protein	K12309	beta-galactosidase	EC:3.2.1.23	smo00511	Other glycan degradation	Metabolism	Glycan biosynthesis and metabolism
TRINITY_DN13378_c0_g2	ath:AT1G15100	44.2	9.8e-06	NA	NA	NA	NA	NA	NA	NA	NA	NA
TRINITY_DN13379_c0_g2	ghi:107941439	52.6	2.7e-35	-	phosphoserine phosphatase	K01079	phosphoserine phosphatase	EC:3.1.3.3	ghi00260	Glycine, serine and threonine metabolism	Metabolism	Amino acid metabolism
TRINITY_DN13380_c0_g2	apro:F751_4456	32.8	2.1e-25	NA	NA	NA	NA	NA	NA	NA	NA	NA
TRINITY_DN13380_c0_g3	sot:102595142	33.9	5.4e-09	NA	NA	NA	NA	NA	NA	NA	NA	NA
TRINITY_DN13381_c0_g1	rcu:8283272	28.1	2.3e-11	-	peroxidase 10	K00430	peroxidase	EC:1.11.1.7	rcu00940	Phenylpropanoid biosynthesis	Metabolism	Biosynthesis of other secondary metabolites
TRINITY_DN13392_c0_g1	var:108335808	48.8	1.1e-175	-	pre-mRNA-splicing factor ATP-dependent RNA helicase DEAH10	K12818	ATP-dependent RNA helicase DHX8/PRP22	EC:3.6.4.13	var03040	Spliceosome	Genetic Information Processing	Transcription
TRINITY_DN13401_c0_g5	aly:ARALYDRAFT_492278	31.8	1.1e-06	-	hypothetical protein	K12893	splicing factor, arginine/serine-rich 4/5/6	-	aly03040	Spliceosome	Genetic Information Processing	Transcription
TRINITY_DN13406_c0_g1	sita:101783600	51.4	2.2e-20	NA	NA	NA	NA	NA	NA	NA	NA	NA
TRINITY_DN13413_c0_g1	vvi:100245428	59.2	1.7e-13	NA	NA	NA	NA	NA	NA	NA	NA	NA
TRINITY_DN13415_c0_g1	csl:COCSUDRAFT_45852	38.3	2.5e-22	-	ATP synthase-like protein O subunit	K02137	F-type H+-transporting ATPase subunit O	-	csl00190	Oxidative phosphorylation	Metabolism	Energy metabolism
TRINITY_DN13416_c0_g1	mcha:111006998	32.8	7.8e-56	NA	NA	NA	NA	NA	NA	NA	NA	NA
TRINITY_DN13425_c2_g3	adu:107465507	100	1.2e-36	-	uncharacterized protein LOC107465507	K02874	large subunit ribosomal protein L14	-	adu03010	Ribosome	Genetic Information Processing	Translation
TRINITY_DN13426_c1_g1	vcn:VOLCADRAFT_121316	38.9	6.4e-11	NA	NA	NA	NA	NA	NA	NA	NA	NA
TRINITY_DN13428_c0_g1	mis:MICPUN_92259	56.9	7.5e-144	NA	NA	NA	NA	NA	NA	NA	NA	NA
TRINITY_DN13429_c0_g2	han:110873074	42.3	2.6e-17	NA	NA	NA	NA	NA	NA	NA	NA	NA
TRINITY_DN13432_c0_g5	sly:101254722	27.1	3e-15	-	alpha carbonic anhydrase 1	K01674	carbonic anhydrase	EC:4.2.1.1	sly00910	Nitrogen metabolism	Metabolism	Energy metabolism
TRINITY_DN13439_c0_g3	pxb:103942743	54.3	1.7e-86	NA	NA	NA	NA	NA	NA	NA	NA	NA
TRINITY_DN13439_c0_g4	lang:109351902	67.1	1.4e-22	-	probable ADP-ribosylation factor GTPase-activating protein AGD5	K12486	stromal membrane-associated protein	-	lang04144	Endocytosis	Cellular Processes	Transport and catabolism
TRINITY_DN13444_c2_g1	gsl:Gasu_60230	29.2	2.2e-47	-	5' nucleotidase family protein	K01081	5'-nucleotidase	EC:3.1.3.5	gsl00230	Purine metabolism	Metabolism	Nucleotide metabolism
TRINITY_DN13444_c2_g1	gsl:Gasu_60230	29.2	2.2e-47	-	5' nucleotidase family protein	K01081	5'-nucleotidase	EC:3.1.3.5	gsl00240	Pyrimidine metabolism	Metabolism	Nucleotide metabolism
TRINITY_DN13444_c2_g1	gsl:Gasu_60230	29.2	2.2e-47	-	5' nucleotidase family protein	K01081	5'-nucleotidase	EC:3.1.3.5	gsl00760	Nicotinate and nicotinamide metabolism	Metabolism	Metabolism of cofactors and vitamins
TRINITY_DN13451_c3_g1	nnu:104599444	71.6	1.5e-30	NA	NA	NA	NA	NA	NA	NA	NA	NA
TRINITY_DN13451_c3_g5	nnu:104599444	51.9	1.1e-23	NA	NA	NA	NA	NA	NA	NA	NA	NA
TRINITY_DN13452_c0_g4	mcha:111008396	32.1	1.4e-18	-	putative glucose-6-phosphate 1-epimerase isoform X1	K01792	glucose-6-phosphate 1-epimerase	EC:5.1.3.15	mcha00010	Glycolysis / Gluconeogenesis	Metabolism	Carbohydrate metabolism
TRINITY_DN13452_c0_g5	dct:110101324	41.1	6.3e-34	NA	NA	NA	NA	NA	NA	NA	NA	NA
TRINITY_DN13452_c0_g9	mpp:MICPUCDRAFT_32934	38.1	1.5e-10	-	hypothetical protein	K01792	glucose-6-phosphate 1-epimerase	EC:5.1.3.15	mpp00010	Glycolysis / Gluconeogenesis	Metabolism	Carbohydrate metabolism
TRINITY_DN13452_c1_g1	mus:103970096	54.6	6.8e-137	NA	NA	NA	NA	NA	NA	NA	NA	NA
TRINITY_DN13452_c1_g3	nta:107805619	37.5	3.1e-39	NA	NA	NA	NA	NA	NA	NA	NA	NA
TRINITY_DN13453_c0_g17	ghi:107925577	39.1	5.5e-17	-	uncharacterized protein LOC107925577	K10756	replication factor C subunit 3/5	-	ghi03030	DNA replication	Genetic Information Processing	Replication and repair
TRINITY_DN13453_c0_g17	ghi:107925577	39.1	5.5e-17	-	uncharacterized protein LOC107925577	K10756	replication factor C subunit 3/5	-	ghi03420	Nucleotide excision repair	Genetic Information Processing	Replication and repair
TRINITY_DN13453_c0_g17	ghi:107925577	39.1	5.5e-17	-	uncharacterized protein LOC107925577	K10756	replication factor C subunit 3/5	-	ghi03430	Mismatch repair	Genetic Information Processing	Replication and repair
TRINITY_DN13453_c0_g6	cit:102610829	38.1	4.1e-36	-	3-dehydrosphinganine reductase TSC10A isoform X3	K04708	3-dehydrosphinganine reductase	EC:1.1.1.102	cit00600	Sphingolipid metabolism	Metabolism	Lipid metabolism
TRINITY_DN13454_c0_g1	mcha:111017348	81.7	1.2e-49	-	tubulin alpha chain	K07374	tubulin alpha	-	mcha04145	Phagosome	Cellular Processes	Transport and catabolism
TRINITY_DN13454_c2_g1	egr:104449214	85.5	6.2e-225	TUA1	tubulin alpha chain-like	K07374	tubulin alpha	-	egr04145	Phagosome	Cellular Processes	Transport and catabolism
TRINITY_DN13454_c2_g2	smo:SELMODRAFT_105136	92.6	3.2e-10	-	hypothetical protein	K07374	tubulin alpha	-	smo04145	Phagosome	Cellular Processes	Transport and catabolism
TRINITY_DN13455_c0_g1	gmx:100795311	52.4	6.2e-179	-	nucleolar GTP-binding protein 1	K06943	nucleolar GTP-binding protein	-	gmx03008	Ribosome biogenesis in eukaryotes	Genetic Information Processing	Translation
TRINITY_DN13467_c0_g1	vvi:100260356	30.2	2.4e-18	-	tropinone reductase homolog At5g06060	K08081	tropinone reductase I	EC:1.1.1.206	vvi00960	Tropane, piperidine and pyridine alkaloid biosynthesis	Metabolism	Biosynthesis of other secondary metabolites
TRINITY_DN13471_c1_g1	gra:105782771	32.6	7.6e-28	-	LAG1 longevity assurance homolog 2	K04710	ceramide synthetase	EC:2.3.1.24	gra00600	Sphingolipid metabolism	Metabolism	Lipid metabolism
TRINITY_DN13472_c0_g1	han:110910923	26	6.1e-17	NA	NA	NA	NA	NA	NA	NA	NA	NA
TRINITY_DN13472_c1_g1	cre:CHLREDRAFT_165420	45	4.2e-25	NAT2	N-acetyltransferase	K00621	glucosamine-phosphate N-acetyltransferase	EC:2.3.1.4	cre00520	Amino sugar and nucleotide sugar metabolism	Metabolism	Carbohydrate metabolism
TRINITY_DN13474_c0_g1	smo:SELMODRAFT_107557	36.7	4.1e-17	-	hypothetical protein	K02183	calmodulin	-	smo04016	MAPK signaling pathway - plant	Environmental Information Processing	Signal transduction
TRINITY_DN13474_c0_g1	smo:SELMODRAFT_107557	36.7	4.1e-17	-	hypothetical protein	K02183	calmodulin	-	smo04070	Phosphatidylinositol signaling system	Environmental Information Processing	Signal transduction
TRINITY_DN13480_c3_g3	csat:104773476	43.9	7.6e-13	-	chitinase-3-like protein 2	K01183	chitinase	EC:3.2.1.14	csat00520	Amino sugar and nucleotide sugar metabolism	Metabolism	Carbohydrate metabolism
TRINITY_DN13486_c0_g1	cpap:110815392	34.4	9e-25	NA	NA	NA	NA	NA	NA	NA	NA	NA
TRINITY_DN13488_c0_g1	pxb:103942823	41.8	1.7e-62	NA	NA	NA	NA	NA	NA	NA	NA	NA
TRINITY_DN13489_c3_g1	var:108334242	53	7.6e-182	NA	NA	NA	NA	NA	NA	NA	NA	NA
TRINITY_DN13489_c4_g4	sbi:8085181	35.4	1.7e-61	NA	NA	NA	NA	NA	NA	NA	NA	NA
TRINITY_DN13492_c0_g1	cpap:110823750	32.5	7e-39	-	purple acid phosphatase 3-like	K14379	tartrate-resistant acid phosphatase type 5	EC:3.1.3.2	cpap00740	Riboflavin metabolism	Metabolism	Metabolism of cofactors and vitamins
TRINITY_DN13492_c0_g2	cann:107875829	30.7	5.1e-36	-	purple acid phosphatase 17-like	K14379	tartrate-resistant acid phosphatase type 5	EC:3.1.3.2	cann00740	Riboflavin metabolism	Metabolism	Metabolism of cofactors and vitamins
TRINITY_DN13492_c0_g4	adu:107490540	34.4	1.2e-15	-	purple acid phosphatase 17-like	K14379	tartrate-resistant acid phosphatase type 5	EC:3.1.3.2	adu00740	Riboflavin metabolism	Metabolism	Metabolism of cofactors and vitamins
TRINITY_DN13494_c0_g1	smo:SELMODRAFT_175848	38.8	6.5e-88	NA	NA	NA	NA	NA	NA	NA	NA	NA
TRINITY_DN13495_c0_g1	ath:AT4G32650	27.4	2.6e-29	NA	NA	NA	NA	NA	NA	NA	NA	NA
TRINITY_DN13502_c0_g1	pxb:103942612	71.6	6.9e-88	NA	NA	NA	NA	NA	NA	NA	NA	NA
TRINITY_DN13508_c0_g2	olu:OSTLU_26644	45.4	8.4e-72	-	predicted protein	K00972	UDP-N-acetylglucosamine/UDP-N-acetylgalactosamine diphosphorylase	EC:2.7.7.23 2.7.7.83	olu00520	Amino sugar and nucleotide sugar metabolism	Metabolism	Carbohydrate metabolism
TRINITY_DN13512_c1_g1	boe:106306538	40.2	4.4e-13	NA	NA	NA	NA	NA	NA	NA	NA	NA
TRINITY_DN13512_c1_g3	brp:103841148	46.2	1.5e-11	NA	NA	NA	NA	NA	NA	NA	NA	NA
TRINITY_DN13518_c0_g1	mtr:MTR_2g039940	43.7	3.4e-56	-	membrane-bound O-acyltransferase family MBOAT protein	K11155	diacylglycerol O-acyltransferase 1	EC:2.3.1.20 2.3.1.75 2.3.1.76	mtr00561	Glycerolipid metabolism	Metabolism	Lipid metabolism
TRINITY_DN1351_c0_g1	cvr:CHLNCDRAFT_31463	79	1.5e-23	NA	NA	NA	NA	NA	NA	NA	NA	NA
TRINITY_DN13521_c0_g1	sot:102602373	37.7	1.1e-18	NA	NA	NA	NA	NA	NA	NA	NA	NA
TRINITY_DN13526_c0_g1	egu:105045710	44.8	2.8e-25	-	probable ADP-ribosylation factor GTPase-activating protein AGD6	K12492	ADP-ribosylation factor GTPase-activating protein 1	-	egu04144	Endocytosis	Cellular Processes	Transport and catabolism
TRINITY_DN13540_c2_g6	cre:CHLREDRAFT_195403	45.6	4e-09	NA	NA	NA	NA	NA	NA	NA	NA	NA
TRINITY_DN13540_c3_g1	vvi:100242474	27.8	2.2e-89	NA	NA	NA	NA	NA	NA	NA	NA	NA
TRINITY_DN13544_c0_g1	cme:CYME_CMC028C	46.5	1.2e-19	NA	NA	NA	NA	NA	NA	NA	NA	NA
TRINITY_DN13550_c1_g5	brp:103861488	45.8	1.3e-110	NA	NA	NA	NA	NA	NA	NA	NA	NA
TRINITY_DN13557_c0_g1	csv:101206015	54.7	4e-140	-	fumarylacetoacetase	K01555	fumarylacetoacetase	EC:3.7.1.2	csv00350	Tyrosine metabolism	Metabolism	Amino acid metabolism
TRINITY_DN13559_c0_g1	cme:CYME_CMS057C	36.5	5.4e-11	-	similar to peroxisomal membrane protein PMP22	K13348	protein Mpv17	-	cme04146	Peroxisome	Cellular Processes	Transport and catabolism
TRINITY_DN13561_c1_g2	smo:SELMODRAFT_439136	35.8	1.8e-70	-	hypothetical protein	K13366	polyamine oxidase	EC:1.5.3.14 1.5.3.16 1.5.3.-	smo00330	Arginine and proline metabolism	Metabolism	Amino acid metabolism
TRINITY_DN13561_c1_g2	smo:SELMODRAFT_439136	35.8	1.8e-70	-	hypothetical protein	K13366	polyamine oxidase	EC:1.5.3.14 1.5.3.16 1.5.3.-	smo00410	beta-Alanine metabolism	Metabolism	Metabolism of other amino acids
TRINITY_DN13561_c1_g7	csl:COCSUDRAFT_15353	52	7.6e-145	-	molybdopterin binding oxidoreductase	K00387	sulfite oxidase	EC:1.8.3.1	csl00920	Sulfur metabolism	Metabolism	Energy metabolism
TRINITY_DN13561_c2_g1	egu:105060234	50.6	1.9e-190	-	DNA replication licensing factor MCM5	K02209	DNA replication licensing factor MCM5	EC:3.6.4.12	egu03030	DNA replication	Genetic Information Processing	Replication and repair
TRINITY_DN13569_c0_g1	vcn:VOLCADRAFT_106247	45.4	1.9e-37	NA	NA	NA	NA	NA	NA	NA	NA	NA
TRINITY_DN13571_c1_g1	boe:106341605	39.5	1.3e-153	NA	NA	NA	NA	NA	NA	NA	NA	NA
TRINITY_DN13572_c0_g1	hbr:110653345	68.4	3.9e-110	-	hydroxymethylglutaryl-CoA lyase	K01640	hydroxymethylglutaryl-CoA lyase	EC:4.1.3.4	hbr00650	Butanoate metabolism	Metabolism	Carbohydrate metabolism
TRINITY_DN13572_c0_g1	hbr:110653345	68.4	3.9e-110	-	hydroxymethylglutaryl-CoA lyase	K01640	hydroxymethylglutaryl-CoA lyase	EC:4.1.3.4	hbr00072	Synthesis and degradation of ketone bodies	Metabolism	Lipid metabolism
TRINITY_DN13572_c0_g1	hbr:110653345	68.4	3.9e-110	-	hydroxymethylglutaryl-CoA lyase	K01640	hydroxymethylglutaryl-CoA lyase	EC:4.1.3.4	hbr00280	Valine, leucine and isoleucine degradation	Metabolism	Amino acid metabolism
TRINITY_DN13572_c0_g1	hbr:110653345	68.4	3.9e-110	-	hydroxymethylglutaryl-CoA lyase	K01640	hydroxymethylglutaryl-CoA lyase	EC:4.1.3.4	hbr04146	Peroxisome	Cellular Processes	Transport and catabolism
TRINITY_DN13578_c0_g1	lja:Lj3g3v0223050.1	35.3	3.2e-19	NA	NA	NA	NA	NA	NA	NA	NA	NA
TRINITY_DN13578_c0_g3	sita:101777987	37.3	2.4e-40	NA	NA	NA	NA	NA	NA	NA	NA	NA
TRINITY_DN13585_c1_g2	atr:18441347	56.6	0	-	splicing factor 3B subunit 3	K12830	splicing factor 3B subunit 3	-	atr03040	Spliceosome	Genetic Information Processing	Transcription
TRINITY_DN13586_c0_g1	mng:MNEG_11357	37.6	1e-20	NA	NA	NA	NA	NA	NA	NA	NA	NA
TRINITY_DN13588_c0_g1	egr:104456924	26.6	1.4e-27	NA	NA	NA	NA	NA	NA	NA	NA	NA
TRINITY_DN13590_c1_g1	egr:104443628	35.1	8.9e-36	-	uncharacterized LOC104443628	K11420	euchromatic histone-lysine N-methyltransferase	EC:2.1.1.43	egr00310	Lysine degradation	Metabolism	Amino acid metabolism
TRINITY_DN13592_c0_g1	apro:F751_3712	41.4	2.1e-16	NA	NA	NA	NA	NA	NA	NA	NA	NA
TRINITY_DN13592_c0_g2	vcn:VOLCADRAFT_42845	54.5	6.9e-76	NA	NA	NA	NA	NA	NA	NA	NA	NA
TRINITY_DN13592_c0_g4	apro:F751_3712	34.1	3e-40	NA	NA	NA	NA	NA	NA	NA	NA	NA
TRINITY_DN13594_c0_g2	dct:110097169	62.7	4.2e-124	NA	NA	NA	NA	NA	NA	NA	NA	NA
TRINITY_DN13595_c0_g1	lang:109332944	58.8	1.6e-75	-	aldehyde dehydrogenase family 2 member B7	K00128	aldehyde dehydrogenase (NAD+)	EC:1.2.1.3	lang00010	Glycolysis / Gluconeogenesis	Metabolism	Carbohydrate metabolism
TRINITY_DN13595_c0_g1	lang:109332944	58.8	1.6e-75	-	aldehyde dehydrogenase family 2 member B7	K00128	aldehyde dehydrogenase (NAD+)	EC:1.2.1.3	lang00053	Ascorbate and aldarate metabolism	Metabolism	Carbohydrate metabolism
TRINITY_DN13595_c0_g1	lang:109332944	58.8	1.6e-75	-	aldehyde dehydrogenase family 2 member B7	K00128	aldehyde dehydrogenase (NAD+)	EC:1.2.1.3	lang00620	Pyruvate metabolism	Metabolism	Carbohydrate metabolism
TRINITY_DN13595_c0_g1	lang:109332944	58.8	1.6e-75	-	aldehyde dehydrogenase family 2 member B7	K00128	aldehyde dehydrogenase (NAD+)	EC:1.2.1.3	lang00071	Fatty acid degradation	Metabolism	Lipid metabolism
TRINITY_DN13595_c0_g1	lang:109332944	58.8	1.6e-75	-	aldehyde dehydrogenase family 2 member B7	K00128	aldehyde dehydrogenase (NAD+)	EC:1.2.1.3	lang00561	Glycerolipid metabolism	Metabolism	Lipid metabolism
TRINITY_DN13595_c0_g1	lang:109332944	58.8	1.6e-75	-	aldehyde dehydrogenase family 2 member B7	K00128	aldehyde dehydrogenase (NAD+)	EC:1.2.1.3	lang00280	Valine, leucine and isoleucine degradation	Metabolism	Amino acid metabolism
TRINITY_DN13595_c0_g1	lang:109332944	58.8	1.6e-75	-	aldehyde dehydrogenase family 2 member B7	K00128	aldehyde dehydrogenase (NAD+)	EC:1.2.1.3	lang00310	Lysine degradation	Metabolism	Amino acid metabolism
TRINITY_DN13595_c0_g1	lang:109332944	58.8	1.6e-75	-	aldehyde dehydrogenase family 2 member B7	K00128	aldehyde dehydrogenase (NAD+)	EC:1.2.1.3	lang00330	Arginine and proline metabolism	Metabolism	Amino acid metabolism
TRINITY_DN13595_c0_g1	lang:109332944	58.8	1.6e-75	-	aldehyde dehydrogenase family 2 member B7	K00128	aldehyde dehydrogenase (NAD+)	EC:1.2.1.3	lang00340	Histidine metabolism	Metabolism	Amino acid metabolism
TRINITY_DN13595_c0_g1	lang:109332944	58.8	1.6e-75	-	aldehyde dehydrogenase family 2 member B7	K00128	aldehyde dehydrogenase (NAD+)	EC:1.2.1.3	lang00380	Tryptophan metabolism	Metabolism	Amino acid metabolism
TRINITY_DN13595_c0_g1	lang:109332944	58.8	1.6e-75	-	aldehyde dehydrogenase family 2 member B7	K00128	aldehyde dehydrogenase (NAD+)	EC:1.2.1.3	lang00410	beta-Alanine metabolism	Metabolism	Metabolism of other amino acids
TRINITY_DN13595_c0_g1	lang:109332944	58.8	1.6e-75	-	aldehyde dehydrogenase family 2 member B7	K00128	aldehyde dehydrogenase (NAD+)	EC:1.2.1.3	lang00903	Limonene and pinene degradation	Metabolism	Metabolism of terpenoids and polyketides
TRINITY_DN13595_c0_g2	han:110879822	59.3	3.8e-84	-	aldehyde dehydrogenase family 2 member B4	K00128	aldehyde dehydrogenase (NAD+)	EC:1.2.1.3	han00010	Glycolysis / Gluconeogenesis	Metabolism	Carbohydrate metabolism
TRINITY_DN13595_c0_g2	han:110879822	59.3	3.8e-84	-	aldehyde dehydrogenase family 2 member B4	K00128	aldehyde dehydrogenase (NAD+)	EC:1.2.1.3	han00053	Ascorbate and aldarate metabolism	Metabolism	Carbohydrate metabolism
TRINITY_DN13595_c0_g2	han:110879822	59.3	3.8e-84	-	aldehyde dehydrogenase family 2 member B4	K00128	aldehyde dehydrogenase (NAD+)	EC:1.2.1.3	han00620	Pyruvate metabolism	Metabolism	Carbohydrate metabolism
TRINITY_DN13595_c0_g2	han:110879822	59.3	3.8e-84	-	aldehyde dehydrogenase family 2 member B4	K00128	aldehyde dehydrogenase (NAD+)	EC:1.2.1.3	han00071	Fatty acid degradation	Metabolism	Lipid metabolism
TRINITY_DN13595_c0_g2	han:110879822	59.3	3.8e-84	-	aldehyde dehydrogenase family 2 member B4	K00128	aldehyde dehydrogenase (NAD+)	EC:1.2.1.3	han00561	Glycerolipid metabolism	Metabolism	Lipid metabolism
TRINITY_DN13595_c0_g2	han:110879822	59.3	3.8e-84	-	aldehyde dehydrogenase family 2 member B4	K00128	aldehyde dehydrogenase (NAD+)	EC:1.2.1.3	han00280	Valine, leucine and isoleucine degradation	Metabolism	Amino acid metabolism
TRINITY_DN13595_c0_g2	han:110879822	59.3	3.8e-84	-	aldehyde dehydrogenase family 2 member B4	K00128	aldehyde dehydrogenase (NAD+)	EC:1.2.1.3	han00310	Lysine degradation	Metabolism	Amino acid metabolism
TRINITY_DN13595_c0_g2	han:110879822	59.3	3.8e-84	-	aldehyde dehydrogenase family 2 member B4	K00128	aldehyde dehydrogenase (NAD+)	EC:1.2.1.3	han00330	Arginine and proline metabolism	Metabolism	Amino acid metabolism
TRINITY_DN13595_c0_g2	han:110879822	59.3	3.8e-84	-	aldehyde dehydrogenase family 2 member B4	K00128	aldehyde dehydrogenase (NAD+)	EC:1.2.1.3	han00340	Histidine metabolism	Metabolism	Amino acid metabolism
TRINITY_DN13595_c0_g2	han:110879822	59.3	3.8e-84	-	aldehyde dehydrogenase family 2 member B4	K00128	aldehyde dehydrogenase (NAD+)	EC:1.2.1.3	han00380	Tryptophan metabolism	Metabolism	Amino acid metabolism
TRINITY_DN13595_c0_g2	han:110879822	59.3	3.8e-84	-	aldehyde dehydrogenase family 2 member B4	K00128	aldehyde dehydrogenase (NAD+)	EC:1.2.1.3	han00410	beta-Alanine metabolism	Metabolism	Metabolism of other amino acids
TRINITY_DN13595_c0_g2	han:110879822	59.3	3.8e-84	-	aldehyde dehydrogenase family 2 member B4	K00128	aldehyde dehydrogenase (NAD+)	EC:1.2.1.3	han00903	Limonene and pinene degradation	Metabolism	Metabolism of terpenoids and polyketides
TRINITY_DN13597_c5_g1	csl:COCSUDRAFT_67112	50.9	5.5e-26	NA	NA	NA	NA	NA	NA	NA	NA	NA
TRINITY_DN13597_c6_g1	mtr:MTR_7g039450	35.9	1.3e-58	-	DNA polymerase lambda-like protein	K03512	DNA polymerase lambda	EC:2.7.7.7 4.2.99.-	mtr03410	Base excision repair	Genetic Information Processing	Replication and repair
TRINITY_DN13597_c6_g1	mtr:MTR_7g039450	35.9	1.3e-58	-	DNA polymerase lambda-like protein	K03512	DNA polymerase lambda	EC:2.7.7.7 4.2.99.-	mtr03450	Non-homologous end-joining	Genetic Information Processing	Replication and repair
TRINITY_DN13602_c0_g1	bna:106381165	35	6.4e-06	NA	NA	NA	NA	NA	NA	NA	NA	NA
TRINITY_DN13603_c0_g1	vvi:100253953	32.9	1.4e-20	NA	NA	NA	NA	NA	NA	NA	NA	NA
TRINITY_DN13611_c0_g1	pda:103711950	60.2	1.9e-53	-	ADP-ribosylation factor 2-like	K07937	ADP-ribosylation factor 1	-	pda04144	Endocytosis	Cellular Processes	Transport and catabolism
TRINITY_DN13616_c0_g1	apro:F751_5969	33.1	8.5e-21	-	putative chaperone protein HSP31	K22211	D-lactate dehydratase	EC:4.2.1.130	apro00620	Pyruvate metabolism	Metabolism	Carbohydrate metabolism
TRINITY_DN13618_c0_g10	cam:101504903	39.2	1e-06	-	ABC transporter C family member 12-like	K05666	ATP-binding cassette, subfamily C (CFTR/MRP), member 2	-	cam02010	ABC transporters	Environmental Information Processing	Membrane transport
TRINITY_DN13618_c0_g4	soe:110775499	37.7	7.8e-36	NA	NA	NA	NA	NA	NA	NA	NA	NA
TRINITY_DN13627_c0_g3	vcn:VOLCADRAFT_30475	28.6	5.2e-17	NA	NA	NA	NA	NA	NA	NA	NA	NA
TRINITY_DN13631_c0_g1	cre:CHLREDRAFT_195517	49.2	3.7e-56	NA	NA	NA	NA	NA	NA	NA	NA	NA
TRINITY_DN13631_c1_g1	vcn:VOLCADRAFT_81347	43.1	1.5e-63	NA	NA	NA	NA	NA	NA	NA	NA	NA
TRINITY_DN13631_c1_g2	cre:CHLREDRAFT_179706	54.6	1.8e-50	RPS7	ribosomal protein S7	K02993	small subunit ribosomal protein S7e	-	cre03010	Ribosome	Genetic Information Processing	Translation
TRINITY_DN13633_c1_g3	fve:101312976	40.5	5.5e-10	NA	NA	NA	NA	NA	NA	NA	NA	NA
TRINITY_DN13637_c0_g2	pvu:PHAVU_001G149600g	36.5	1.6e-26	-	hypothetical protein	K13917	mRNA-capping enzyme	EC:2.7.7.50 3.6.1.-	pvu03015	mRNA surveillance pathway	Genetic Information Processing	Translation
TRINITY_DN13643_c3_g2	gra:105792768	30.6	1.9e-68	NA	NA	NA	NA	NA	NA	NA	NA	NA
TRINITY_DN13643_c3_g3	mpp:MICPUCDRAFT_56252	48.3	1.3e-135	-	hypothetical protein	K00681	gamma-glutamyltranspeptidase / glutathione hydrolase	EC:2.3.2.2 3.4.19.13	mpp00430	Taurine and hypotaurine metabolism	Metabolism	Metabolism of other amino acids
TRINITY_DN13643_c3_g3	mpp:MICPUCDRAFT_56252	48.3	1.3e-135	-	hypothetical protein	K00681	gamma-glutamyltranspeptidase / glutathione hydrolase	EC:2.3.2.2 3.4.19.13	mpp00460	Cyanoamino acid metabolism	Metabolism	Metabolism of other amino acids
TRINITY_DN13643_c3_g3	mpp:MICPUCDRAFT_56252	48.3	1.3e-135	-	hypothetical protein	K00681	gamma-glutamyltranspeptidase / glutathione hydrolase	EC:2.3.2.2 3.4.19.13	mpp00480	Glutathione metabolism	Metabolism	Metabolism of other amino acids
TRINITY_DN13644_c0_g13	pda:103700845	60	1.7e-54	-	ubiquitin-conjugating enzyme E2-23 kDa-like	K10576	ubiquitin-conjugating enzyme E2 H	EC:2.3.2.23	pda04120	Ubiquitin mediated proteolysis	Genetic Information Processing	Folding, sorting and degradation
TRINITY_DN13644_c0_g2	osa:4352669	27.2	3.5e-13	-	cytoplasmic tRNA 2-thiolation protein 2	K14169	cytoplasmic tRNA 2-thiolation protein 2	-	osa04122	Sulfur relay system	Genetic Information Processing	Folding, sorting and degradation
TRINITY_DN13650_c0_g1	mdm:103403745	37.6	3.1e-34	NA	NA	NA	NA	NA	NA	NA	NA	NA
TRINITY_DN13654_c0_g3	cre:CHLREDRAFT_130269	44.6	5.3e-81	NA	NA	NA	NA	NA	NA	NA	NA	NA
TRINITY_DN13660_c0_g1	osa:4338566	37.9	3.1e-31	-	thiamine pyrophosphokinase 3	K00949	thiamine pyrophosphokinase	EC:2.7.6.2	osa00730	Thiamine metabolism	Metabolism	Metabolism of cofactors and vitamins
TRINITY_DN13662_c4_g1	gsl:Gasu_04200	75	7.2e-216	-	F-type H+-transporting ATPase subunit alpha	K02132	F-type H+-transporting ATPase subunit alpha	-	gsl00190	Oxidative phosphorylation	Metabolism	Energy metabolism
TRINITY_DN13666_c2_g4	pper:18785403	52.3	6.6e-72	-	vacuolar protein sorting-associated protein 26A	K18466	vacuolar protein sorting-associated protein 26	-	pper04144	Endocytosis	Cellular Processes	Transport and catabolism
TRINITY_DN13667_c0_g2	smo:SELMODRAFT_267388	29.3	6.9e-31	NA	NA	NA	NA	NA	NA	NA	NA	NA
TRINITY_DN13671_c2_g5	cam:101508132	47.4	7.8e-152	NA	NA	NA	NA	NA	NA	NA	NA	NA
TRINITY_DN13671_c2_g8	vcn:VOLCADRAFT_64591	63.7	2.5e-25	-	hypothetical protein	K03027	DNA-directed RNA polymerases I and III subunit RPAC1	-	vcn00230	Purine metabolism	Metabolism	Nucleotide metabolism
TRINITY_DN13671_c2_g8	vcn:VOLCADRAFT_64591	63.7	2.5e-25	-	hypothetical protein	K03027	DNA-directed RNA polymerases I and III subunit RPAC1	-	vcn00240	Pyrimidine metabolism	Metabolism	Nucleotide metabolism
TRINITY_DN13671_c2_g8	vcn:VOLCADRAFT_64591	63.7	2.5e-25	-	hypothetical protein	K03027	DNA-directed RNA polymerases I and III subunit RPAC1	-	vcn03020	RNA polymerase	Genetic Information Processing	Transcription
TRINITY_DN13679_c0_g2	mtr:MTR_1g105460	31.8	2.7e-17	NA	NA	NA	NA	NA	NA	NA	NA	NA
TRINITY_DN13682_c0_g1	mis:MICPUN_96161	29.4	5.5e-17	NA	NA	NA	NA	NA	NA	NA	NA	NA
TRINITY_DN13686_c0_g2	vcn:VOLCADRAFT_103736	65.8	4.6e-91	NA	NA	NA	NA	NA	NA	NA	NA	NA
TRINITY_DN13686_c0_g4	csl:COCSUDRAFT_58980	79.1	1.1e-68	-	Fibrillarin	K14563	rRNA 2'-O-methyltransferase fibrillarin	EC:2.1.1.-	csl03008	Ribosome biogenesis in eukaryotes	Genetic Information Processing	Translation
TRINITY_DN13686_c0_g6	gsl:Gasu_38910	73.6	3.9e-34	-	fibrillarin-like pre-rRNA processing protein	K14563	rRNA 2'-O-methyltransferase fibrillarin	EC:2.1.1.-	gsl03008	Ribosome biogenesis in eukaryotes	Genetic Information Processing	Translation
TRINITY_DN13689_c0_g1	mis:MICPUN_90789	39	6.1e-25	-	ras-related gtp-binding protein	K07901	Ras-related protein Rab-8A	-	mis04144	Endocytosis	Cellular Processes	Transport and catabolism
TRINITY_DN13692_c1_g3	cre:CHLREDRAFT_129868	89.8	5.6e-226	TUB2	beta tubulin 2	K07375	tubulin beta	-	cre04145	Phagosome	Cellular Processes	Transport and catabolism
TRINITY_DN13692_c1_g4	smo:SELMODRAFT_407397	54.8	6.6e-62	-	hypothetical protein	K14568	rRNA small subunit pseudouridine methyltransferase Nep1	EC:2.1.1.260	smo03008	Ribosome biogenesis in eukaryotes	Genetic Information Processing	Translation
TRINITY_DN13694_c2_g2	obr:102722264	28.7	2e-07	NA	NA	NA	NA	NA	NA	NA	NA	NA
TRINITY_DN13694_c3_g1	bpg:Bathy12g01230	47.6	6.2e-26	-	hypothetical protein	K12486	stromal membrane-associated protein	-	bpg04144	Endocytosis	Cellular Processes	Transport and catabolism
TRINITY_DN13695_c3_g3	smo:SELMODRAFT_166561	50	1.2e-67	-	hypothetical protein	K00109	2-hydroxyglutarate dehydrogenase	EC:1.1.99.2	smo00650	Butanoate metabolism	Metabolism	Carbohydrate metabolism
TRINITY_DN13695_c3_g4	thj:104816331	31.7	1.5e-45	-	dnaJ protein P58IPK homolog	K09523	DnaJ homolog subfamily C member 3	-	thj04141	Protein processing in endoplasmic reticulum	Genetic Information Processing	Folding, sorting and degradation
TRINITY_DN13695_c3_g6	gsl:Gasu_07980	34.6	1.9e-09	-	CDP-diacylglycerol--glycerol-3-phosphate 3-phosphatidyltransferase	K08744	cardiolipin synthase (CMP-forming)	EC:2.7.8.41	gsl00564	Glycerophospholipid metabolism	Metabolism	Lipid metabolism
TRINITY_DN13695_c3_g8	smo:SELMODRAFT_166561	40.6	2.9e-23	-	hypothetical protein	K00109	2-hydroxyglutarate dehydrogenase	EC:1.1.99.2	smo00650	Butanoate metabolism	Metabolism	Carbohydrate metabolism
TRINITY_DN13700_c0_g2	aly:ARALYDRAFT_915833	32.5	1.8e-26	NA	NA	NA	NA	NA	NA	NA	NA	NA
TRINITY_DN13701_c3_g5	smo:SELMODRAFT_438068	42.2	5.9e-76	-	hypothetical protein	K02542	DNA replication licensing factor MCM6	EC:3.6.4.12	smo03030	DNA replication	Genetic Information Processing	Replication and repair
TRINITY_DN13702_c0_g1	nnu:104600699	42.3	2.9e-133	-	beta-galactosidase 17	K12309	beta-galactosidase	EC:3.2.1.23	nnu00052	Galactose metabolism	Metabolism	Carbohydrate metabolism
TRINITY_DN13702_c0_g1	nnu:104600699	42.3	2.9e-133	-	beta-galactosidase 17	K12309	beta-galactosidase	EC:3.2.1.23	nnu00600	Sphingolipid metabolism	Metabolism	Lipid metabolism
TRINITY_DN13702_c0_g1	nnu:104600699	42.3	2.9e-133	-	beta-galactosidase 17	K12309	beta-galactosidase	EC:3.2.1.23	nnu00531	Glycosaminoglycan degradation	Metabolism	Glycan biosynthesis and metabolism
TRINITY_DN13702_c0_g1	nnu:104600699	42.3	2.9e-133	-	beta-galactosidase 17	K12309	beta-galactosidase	EC:3.2.1.23	nnu00604	Glycosphingolipid biosynthesis - ganglio series	Metabolism	Glycan biosynthesis and metabolism
TRINITY_DN13702_c0_g1	nnu:104600699	42.3	2.9e-133	-	beta-galactosidase 17	K12309	beta-galactosidase	EC:3.2.1.23	nnu00511	Other glycan degradation	Metabolism	Glycan biosynthesis and metabolism
TRINITY_DN13703_c0_g1	pxb:103939751	78.1	2.2e-152	-	serine/threonine-protein phosphatase PP1 isoform X1	K06269	serine/threonine-protein phosphatase PP1 catalytic subunit	EC:3.1.3.16	pxb03015	mRNA surveillance pathway	Genetic Information Processing	Translation
TRINITY_DN13709_c3_g4	dct:110105967	33.3	1.8e-12	NA	NA	NA	NA	NA	NA	NA	NA	NA
TRINITY_DN13709_c3_g7	han:110927139	28.6	1e-07	NA	NA	NA	NA	NA	NA	NA	NA	NA
TRINITY_DN13710_c4_g3	olu:OSTLU_49676	69.9	9.1e-124	-	predicted protein	K13998	dihydrofolate reductase / thymidylate synthase	EC:1.5.1.3 2.1.1.45	olu00240	Pyrimidine metabolism	Metabolism	Nucleotide metabolism
TRINITY_DN13710_c4_g3	olu:OSTLU_49676	69.9	9.1e-124	-	predicted protein	K13998	dihydrofolate reductase / thymidylate synthase	EC:1.5.1.3 2.1.1.45	olu00790	Folate biosynthesis	Metabolism	Metabolism of cofactors and vitamins
TRINITY_DN13710_c4_g3	olu:OSTLU_49676	69.9	9.1e-124	-	predicted protein	K13998	dihydrofolate reductase / thymidylate synthase	EC:1.5.1.3 2.1.1.45	olu00670	One carbon pool by folate	Metabolism	Metabolism of cofactors and vitamins
TRINITY_DN13710_c4_g4	ghi:107949162	40.7	9.1e-10	NA	NA	NA	NA	NA	NA	NA	NA	NA
TRINITY_DN13713_c2_g2	ath:AT3G08505	47.1	2.2e-53	NA	NA	NA	NA	NA	NA	NA	NA	NA
TRINITY_DN13716_c2_g1	aip:107609424	40	1.1e-15	-	plant UBX domain-containing protein 4 isoform X1	K14012	UBX domain-containing protein 1	-	aip04141	Protein processing in endoplasmic reticulum	Genetic Information Processing	Folding, sorting and degradation
TRINITY_DN13716_c2_g2	gsl:Gasu_24150	26	7.3e-06	-	hypothetical protein	K14012	UBX domain-containing protein 1	-	gsl04141	Protein processing in endoplasmic reticulum	Genetic Information Processing	Folding, sorting and degradation
TRINITY_DN13722_c0_g10	sly:101254472	35.5	2.1e-29	NA	NA	NA	NA	NA	NA	NA	NA	NA
TRINITY_DN13722_c0_g8	ccp:CHC_T00003067001	59	3e-08	-	hypothetical protein	K04564	superoxide dismutase, Fe-Mn family	EC:1.15.1.1	ccp04146	Peroxisome	Cellular Processes	Transport and catabolism
TRINITY_DN13723_c0_g3	mng:MNEG_10448	54.3	2.4e-33	-	Glycine cleavage system H protein	K02437	glycine cleavage system H protein	-	mng00630	Glyoxylate and dicarboxylate metabolism	Metabolism	Carbohydrate metabolism
TRINITY_DN13723_c0_g3	mng:MNEG_10448	54.3	2.4e-33	-	Glycine cleavage system H protein	K02437	glycine cleavage system H protein	-	mng00260	Glycine, serine and threonine metabolism	Metabolism	Amino acid metabolism
TRINITY_DN13731_c2_g1	nnu:104608191	34.5	3.9e-41	NA	NA	NA	NA	NA	NA	NA	NA	NA
TRINITY_DN13731_c3_g1	adu:107470493	65.5	7.2e-44	NA	NA	NA	NA	NA	NA	NA	NA	NA
TRINITY_DN13741_c0_g1	mus:103975648	38.7	8.3e-27	-	pathogenesis-related protein 1-like	K13449	pathogenesis-related protein 1	-	mus04016	MAPK signaling pathway - plant	Environmental Information Processing	Signal transduction
TRINITY_DN13741_c0_g1	mus:103975648	38.7	8.3e-27	-	pathogenesis-related protein 1-like	K13449	pathogenesis-related protein 1	-	mus04075	Plant hormone signal transduction	Environmental Information Processing	Signal transduction
TRINITY_DN13741_c0_g1	mus:103975648	38.7	8.3e-27	-	pathogenesis-related protein 1-like	K13449	pathogenesis-related protein 1	-	mus04626	Plant-pathogen interaction	Organismal Systems	Environmental adaptation
TRINITY_DN13743_c0_g1	smo:SELMODRAFT_94249	56.9	3.2e-67	NA	NA	NA	NA	NA	NA	NA	NA	NA
TRINITY_DN13746_c3_g2	obr:102704008	51.2	2.6e-52	NA	NA	NA	NA	NA	NA	NA	NA	NA
TRINITY_DN13748_c0_g1	ini:109182096	41.7	6.9e-07	-	serine/threonine-protein kinase CTR1-like	K14510	serine/threonine-protein kinase CTR1	EC:2.7.11.1	ini04016	MAPK signaling pathway - plant	Environmental Information Processing	Signal transduction
TRINITY_DN13748_c0_g1	ini:109182096	41.7	6.9e-07	-	serine/threonine-protein kinase CTR1-like	K14510	serine/threonine-protein kinase CTR1	EC:2.7.11.1	ini04075	Plant hormone signal transduction	Environmental Information Processing	Signal transduction
TRINITY_DN13748_c0_g3	ghi:107957713	47	1.9e-102	-	2-oxoisovalerate dehydrogenase subunit alpha 1	K00166	2-oxoisovalerate dehydrogenase E1 component alpha subunit	EC:1.2.4.4	ghi00640	Propanoate metabolism	Metabolism	Carbohydrate metabolism
TRINITY_DN13748_c0_g3	ghi:107957713	47	1.9e-102	-	2-oxoisovalerate dehydrogenase subunit alpha 1	K00166	2-oxoisovalerate dehydrogenase E1 component alpha subunit	EC:1.2.4.4	ghi00280	Valine, leucine and isoleucine degradation	Metabolism	Amino acid metabolism
TRINITY_DN13750_c1_g1	ccp:CHC_T00009240001	28.4	6.9e-19	-	Diacylglycerol O-acyltransferase	K11155	diacylglycerol O-acyltransferase 1	EC:2.3.1.20 2.3.1.75 2.3.1.76	ccp00561	Glycerolipid metabolism	Metabolism	Lipid metabolism
TRINITY_DN13760_c0_g5	nto:108945874	64.7	2.6e-06	-	uncharacterized protein LOC108945874	K03046	DNA-directed RNA polymerase subunit beta'	EC:2.7.7.6	nto00230	Purine metabolism	Metabolism	Nucleotide metabolism
TRINITY_DN13760_c0_g5	nto:108945874	64.7	2.6e-06	-	uncharacterized protein LOC108945874	K03046	DNA-directed RNA polymerase subunit beta'	EC:2.7.7.6	nto00240	Pyrimidine metabolism	Metabolism	Nucleotide metabolism
TRINITY_DN13760_c0_g5	nto:108945874	64.7	2.6e-06	-	uncharacterized protein LOC108945874	K03046	DNA-directed RNA polymerase subunit beta'	EC:2.7.7.6	nto03020	RNA polymerase	Genetic Information Processing	Transcription
TRINITY_DN13760_c0_g6	nto:108945874	81.2	8.2e-21	-	uncharacterized protein LOC108945874	K03046	DNA-directed RNA polymerase subunit beta'	EC:2.7.7.6	nto00230	Purine metabolism	Metabolism	Nucleotide metabolism
TRINITY_DN13760_c0_g6	nto:108945874	81.2	8.2e-21	-	uncharacterized protein LOC108945874	K03046	DNA-directed RNA polymerase subunit beta'	EC:2.7.7.6	nto00240	Pyrimidine metabolism	Metabolism	Nucleotide metabolism
TRINITY_DN13760_c0_g6	nto:108945874	81.2	8.2e-21	-	uncharacterized protein LOC108945874	K03046	DNA-directed RNA polymerase subunit beta'	EC:2.7.7.6	nto03020	RNA polymerase	Genetic Information Processing	Transcription
TRINITY_DN13761_c0_g2	cvr:CHLNCDRAFT_142077	36	2.2e-07	-	hypothetical protein	K14326	regulator of nonsense transcripts 1	EC:3.6.4.-	cvr03013	RNA transport	Genetic Information Processing	Translation
TRINITY_DN13761_c0_g2	cvr:CHLNCDRAFT_142077	36	2.2e-07	-	hypothetical protein	K14326	regulator of nonsense transcripts 1	EC:3.6.4.-	cvr03015	mRNA surveillance pathway	Genetic Information Processing	Translation
TRINITY_DN13762_c0_g2	vcn:VOLCADRAFT_109782	56.8	1.2e-22	-	hypothetical protein	K12620	U6 snRNA-associated Sm-like protein LSm1	-	vcn03018	RNA degradation	Genetic Information Processing	Folding, sorting and degradation
TRINITY_DN13764_c0_g2	bdi:100843272	38.7	1.3e-22	-	riboflavin biosynthesis protein PYRR	K11752	diaminohydroxyphosphoribosylaminopyrimidine deaminase / 5-amino-6-(5-phosphoribosylamino)uracil reductase	EC:3.5.4.26 1.1.1.193	bdi00740	Riboflavin metabolism	Metabolism	Metabolism of cofactors and vitamins
TRINITY_DN13768_c2_g10	smo:SELMODRAFT_270329	81.5	2.9e-78	-	hypothetical protein	K03120	transcription initiation factor TFIID TATA-box-binding protein	-	smo03022	Basal transcription factors	Genetic Information Processing	Transcription
TRINITY_DN13771_c0_g2	rcu:8283272	45.3	2.7e-09	-	peroxidase 10	K00430	peroxidase	EC:1.11.1.7	rcu00940	Phenylpropanoid biosynthesis	Metabolism	Biosynthesis of other secondary metabolites
TRINITY_DN13773_c1_g4	vcn:VOLCADRAFT_83246	31.7	1.8e-18	NA	NA	NA	NA	NA	NA	NA	NA	NA
TRINITY_DN13776_c4_g2	vvi:100253570	28.6	4.5e-25	-	monodehydroascorbate reductase 5	K08232	monodehydroascorbate reductase (NADH)	EC:1.6.5.4	vvi00053	Ascorbate and aldarate metabolism	Metabolism	Carbohydrate metabolism
TRINITY_DN13780_c0_g1	bvg:104907336	31.3	3.4e-18	-	persulfide dioxygenase ETHE1 homolog	K17725	sulfur dioxygenase	EC:1.13.11.18	bvg00920	Sulfur metabolism	Metabolism	Energy metabolism
TRINITY_DN13784_c0_g1	mis:MICPUN_86067	50.6	7.8e-38	NA	NA	NA	NA	NA	NA	NA	NA	NA
TRINITY_DN13785_c0_g1	cam:101495772	32.9	3.8e-30	-	cysteine and histidine-rich domain-containing protein RAR1	K13458	disease resistance protein	-	cam04626	Plant-pathogen interaction	Organismal Systems	Environmental adaptation
TRINITY_DN13787_c0_g1	adu:107467387	46.4	9.9e-184	-	glutamine--tRNA ligase isoform X1	K01886	glutaminyl-tRNA synthetase	EC:6.1.1.18	adu00970	Aminoacyl-tRNA biosynthesis	Genetic Information Processing	Translation
TRINITY_DN13788_c0_g3	ccp:CHC_T00006835001	35.1	8.3e-26	NA	NA	NA	NA	NA	NA	NA	NA	NA
TRINITY_DN13789_c0_g1	smo:SELMODRAFT_97576	31	5.2e-06	NA	NA	NA	NA	NA	NA	NA	NA	NA
TRINITY_DN13789_c0_g2	adu:107483842	49.3	1.1e-67	NA	NA	NA	NA	NA	NA	NA	NA	NA
TRINITY_DN13794_c1_g1	sly:101256864	32.6	4.3e-08	NA	NA	NA	NA	NA	NA	NA	NA	NA
TRINITY_DN13795_c0_g1	mtr:MTR_2g013070	49.3	1.5e-88	-	sphingolipid delta desaturase	K04712	sphingolipid 4-desaturase/C4-monooxygenase	EC:1.14.19.17 1.14.18.5	mtr00600	Sphingolipid metabolism	Metabolism	Lipid metabolism
TRINITY_DN13795_c0_g2	mis:MICPUN_92116	49.6	4.8e-30	NA	NA	NA	NA	NA	NA	NA	NA	NA
TRINITY_DN13798_c2_g2	pper:18772516	31.2	3.2e-33	NA	NA	NA	NA	NA	NA	NA	NA	NA
TRINITY_DN13800_c0_g3	obr:102713695	29.6	6.8e-66	-	DNA polymerase alpha subunit B	K02321	DNA polymerase alpha subunit B	-	obr00230	Purine metabolism	Metabolism	Nucleotide metabolism
TRINITY_DN13800_c0_g3	obr:102713695	29.6	6.8e-66	-	DNA polymerase alpha subunit B	K02321	DNA polymerase alpha subunit B	-	obr00240	Pyrimidine metabolism	Metabolism	Nucleotide metabolism
TRINITY_DN13800_c0_g3	obr:102713695	29.6	6.8e-66	-	DNA polymerase alpha subunit B	K02321	DNA polymerase alpha subunit B	-	obr03030	DNA replication	Genetic Information Processing	Replication and repair
TRINITY_DN13800_c0_g4	obr:102710353	32.8	1.3e-26	-	ras-related protein Rab2BV-like	K07904	Ras-related protein Rab-11A	-	obr04144	Endocytosis	Cellular Processes	Transport and catabolism
TRINITY_DN13800_c0_g6	fve:101294027	51.9	1.7e-29	-	60S ribosomal protein L14-2	K02875	large subunit ribosomal protein L14e	-	fve03010	Ribosome	Genetic Information Processing	Translation
TRINITY_DN13802_c2_g4	dct:110103552	23.3	2.1e-25	NA	NA	NA	NA	NA	NA	NA	NA	NA
TRINITY_DN13802_c2_g7	zju:107411701	31.9	1.1e-47	-	ATP-dependent DNA helicase RecQ-like	K03654	ATP-dependent DNA helicase RecQ	EC:3.6.4.12	zju03018	RNA degradation	Genetic Information Processing	Folding, sorting and degradation
TRINITY_DN13805_c0_g1	tcc:18603531	45.7	8e-10	NA	NA	NA	NA	NA	NA	NA	NA	NA
TRINITY_DN13808_c3_g2	gsl:Gasu_34010	46.6	5.3e-101	NA	NA	NA	NA	NA	NA	NA	NA	NA
TRINITY_DN13811_c0_g1	vra:106779444	41.2	1e-10	-	brefeldin A-inhibited guanine nucleotide-exchange protein 2	K18442	brefeldin A-inhibited guanine nucleotide-exchange protein	-	vra04144	Endocytosis	Cellular Processes	Transport and catabolism
TRINITY_DN13811_c0_g6	dct:110092823	43.1	7.6e-06	NA	NA	NA	NA	NA	NA	NA	NA	NA
TRINITY_DN13818_c0_g1	han:110865097	42.9	2.1e-27	-	riboflavin biosynthesis protein PYRR	K11752	diaminohydroxyphosphoribosylaminopyrimidine deaminase / 5-amino-6-(5-phosphoribosylamino)uracil reductase	EC:3.5.4.26 1.1.1.193	han00740	Riboflavin metabolism	Metabolism	Metabolism of cofactors and vitamins
TRINITY_DN13819_c5_g2	cre:CHLREDRAFT_155464	64.1	2.4e-68	NA	NA	NA	NA	NA	NA	NA	NA	NA
TRINITY_DN13822_c0_g1	lja:Lj1g3v4695530.1	34	1.4e-16	Lj1g3v4695530.1	-	K14510	serine/threonine-protein kinase CTR1	EC:2.7.11.1	lja04016	MAPK signaling pathway - plant	Environmental Information Processing	Signal transduction
TRINITY_DN13822_c0_g1	lja:Lj1g3v4695530.1	34	1.4e-16	Lj1g3v4695530.1	-	K14510	serine/threonine-protein kinase CTR1	EC:2.7.11.1	lja04075	Plant hormone signal transduction	Environmental Information Processing	Signal transduction
TRINITY_DN13828_c1_g3	cme:CYME_CMC011C	40.4	3.1e-131	-	ATP-binding cassette	K05677	ATP-binding cassette, subfamily D (ALD), member 3	-	cme02010	ABC transporters	Environmental Information Processing	Membrane transport
TRINITY_DN13828_c1_g3	cme:CYME_CMC011C	40.4	3.1e-131	-	ATP-binding cassette	K05677	ATP-binding cassette, subfamily D (ALD), member 3	-	cme04146	Peroxisome	Cellular Processes	Transport and catabolism
TRINITY_DN13830_c0_g4	nto:108945874	54.1	8.9e-10	-	uncharacterized protein LOC108945874	K03046	DNA-directed RNA polymerase subunit beta'	EC:2.7.7.6	nto00230	Purine metabolism	Metabolism	Nucleotide metabolism
TRINITY_DN13830_c0_g4	nto:108945874	54.1	8.9e-10	-	uncharacterized protein LOC108945874	K03046	DNA-directed RNA polymerase subunit beta'	EC:2.7.7.6	nto00240	Pyrimidine metabolism	Metabolism	Nucleotide metabolism
TRINITY_DN13830_c0_g4	nto:108945874	54.1	8.9e-10	-	uncharacterized protein LOC108945874	K03046	DNA-directed RNA polymerase subunit beta'	EC:2.7.7.6	nto03020	RNA polymerase	Genetic Information Processing	Transcription
TRINITY_DN13830_c0_g7	nto:108945874	57.5	4.7e-11	-	uncharacterized protein LOC108945874	K03046	DNA-directed RNA polymerase subunit beta'	EC:2.7.7.6	nto00230	Purine metabolism	Metabolism	Nucleotide metabolism
TRINITY_DN13830_c0_g7	nto:108945874	57.5	4.7e-11	-	uncharacterized protein LOC108945874	K03046	DNA-directed RNA polymerase subunit beta'	EC:2.7.7.6	nto00240	Pyrimidine metabolism	Metabolism	Nucleotide metabolism
TRINITY_DN13830_c0_g7	nto:108945874	57.5	4.7e-11	-	uncharacterized protein LOC108945874	K03046	DNA-directed RNA polymerase subunit beta'	EC:2.7.7.6	nto03020	RNA polymerase	Genetic Information Processing	Transcription
TRINITY_DN13834_c4_g4	nnu:104601830	35.8	7.1e-08	NA	NA	NA	NA	NA	NA	NA	NA	NA
TRINITY_DN13836_c2_g2	brp:103853535	33.6	7.5e-07	-	transcription initiation factor IIE subunit beta-like	K03137	transcription initiation factor TFIIE subunit beta	-	brp03022	Basal transcription factors	Genetic Information Processing	Transcription
TRINITY_DN13836_c3_g1	cpap:110815660	39.2	6.1e-07	NA	NA	NA	NA	NA	NA	NA	NA	NA
TRINITY_DN13843_c1_g12	brp:103865474	26.9	2.8e-36	NA	NA	NA	NA	NA	NA	NA	NA	NA
TRINITY_DN13843_c1_g3	mis:MICPUN_93714	51.2	6.2e-194	-	predicted protein	K00820	glucosamine---fructose-6-phosphate aminotransferase (isomerizing)	EC:2.6.1.16	mis00520	Amino sugar and nucleotide sugar metabolism	Metabolism	Carbohydrate metabolism
TRINITY_DN13843_c1_g3	mis:MICPUN_93714	51.2	6.2e-194	-	predicted protein	K00820	glucosamine---fructose-6-phosphate aminotransferase (isomerizing)	EC:2.6.1.16	mis00250	Alanine, aspartate and glutamate metabolism	Metabolism	Amino acid metabolism
TRINITY_DN13845_c0_g4	ini:109174511	26.5	9.8e-06	NA	NA	NA	NA	NA	NA	NA	NA	NA
TRINITY_DN13846_c4_g2	egu:105045616	28	6.4e-24	-	WD repeat-containing protein 43	K14546	U3 small nucleolar RNA-associated protein 5	-	egu03008	Ribosome biogenesis in eukaryotes	Genetic Information Processing	Translation
TRINITY_DN13846_c4_g3	ini:109155115	34.4	6e-10	-	WD repeat-containing protein 43-like	K14546	U3 small nucleolar RNA-associated protein 5	-	ini03008	Ribosome biogenesis in eukaryotes	Genetic Information Processing	Translation
TRINITY_DN13847_c0_g3	cme:CYME_CMD113C	45.3	6.1e-94	-	glycerol-3-phosphate dehydrogenase	K00006	glycerol-3-phosphate dehydrogenase (NAD+)	EC:1.1.1.8	cme00564	Glycerophospholipid metabolism	Metabolism	Lipid metabolism
TRINITY_DN13848_c1_g5	apro:F751_5402	37.7	1.9e-43	-	Dihydropyrimidine dehydrogenase [NADP(+)]	K00207	dihydropyrimidine dehydrogenase (NADP+)	EC:1.3.1.2	apro00240	Pyrimidine metabolism	Metabolism	Nucleotide metabolism
TRINITY_DN13848_c1_g5	apro:F751_5402	37.7	1.9e-43	-	Dihydropyrimidine dehydrogenase [NADP(+)]	K00207	dihydropyrimidine dehydrogenase (NADP+)	EC:1.3.1.2	apro00410	beta-Alanine metabolism	Metabolism	Metabolism of other amino acids
TRINITY_DN13848_c1_g5	apro:F751_5402	37.7	1.9e-43	-	Dihydropyrimidine dehydrogenase [NADP(+)]	K00207	dihydropyrimidine dehydrogenase (NADP+)	EC:1.3.1.2	apro00770	Pantothenate and CoA biosynthesis	Metabolism	Metabolism of cofactors and vitamins
TRINITY_DN13848_c1_g8	pda:103713334	22.1	2.2e-16	-	glutamate synthase 1 [NADH]	K00264	glutamate synthase (NADPH/NADH)	EC:1.4.1.13 1.4.1.14	pda00910	Nitrogen metabolism	Metabolism	Energy metabolism
TRINITY_DN13848_c1_g8	pda:103713334	22.1	2.2e-16	-	glutamate synthase 1 [NADH]	K00264	glutamate synthase (NADPH/NADH)	EC:1.4.1.13 1.4.1.14	pda00250	Alanine, aspartate and glutamate metabolism	Metabolism	Amino acid metabolism
TRINITY_DN13854_c2_g3	vcn:VOLCADRAFT_79838	68.9	4.2e-22	NA	NA	NA	NA	NA	NA	NA	NA	NA
TRINITY_DN13856_c5_g1	lang:109341945	89.8	1.7e-16	NA	NA	NA	NA	NA	NA	NA	NA	NA
TRINITY_DN13856_c5_g3	lang:109341945	89.8	4.9e-16	NA	NA	NA	NA	NA	NA	NA	NA	NA
TRINITY_DN13857_c0_g1	pxb:103953213	40	4.7e-31	-	probable calcium-binding protein CML49 isoform X1	K13448	calcium-binding protein CML	-	pxb04626	Plant-pathogen interaction	Organismal Systems	Environmental adaptation
TRINITY_DN13857_c0_g2	bvg:104889397	41	2.7e-30	-	probable calcium-binding protein CML49	K13448	calcium-binding protein CML	-	bvg04626	Plant-pathogen interaction	Organismal Systems	Environmental adaptation
TRINITY_DN13860_c0_g5	gmx:100804342	37.8	1.4e-08	-	probable ADP-ribosylation factor GTPase-activating protein AGD11	K12486	stromal membrane-associated protein	-	gmx04144	Endocytosis	Cellular Processes	Transport and catabolism
TRINITY_DN13860_c1_g3	brp:103872612	38.4	1.5e-16	-	plant cysteine oxidase 3	K10712	cysteamine dioxygenase	EC:1.13.11.19	brp00430	Taurine and hypotaurine metabolism	Metabolism	Metabolism of other amino acids
TRINITY_DN13860_c1_g4	sly:101266271	53.8	1.3e-52	-	vacuolar protein sorting-associated protein 22 homolog 1	K12188	ESCRT-II complex subunit VPS22	-	sly04144	Endocytosis	Cellular Processes	Transport and catabolism
TRINITY_DN13861_c3_g1	vcn:VOLCADRAFT_79621	43.8	4.6e-68	NA	NA	NA	NA	NA	NA	NA	NA	NA
TRINITY_DN13863_c0_g1	ats:109765252	36.3	1.9e-34	NA	NA	NA	NA	NA	NA	NA	NA	NA
TRINITY_DN13864_c0_g2	apro:F751_0997	45.4	2.4e-108	NA	NA	NA	NA	NA	NA	NA	NA	NA
TRINITY_DN13867_c1_g1	egu:105057103	51	3.6e-32	NA	NA	NA	NA	NA	NA	NA	NA	NA
TRINITY_DN13875_c0_g2	ini:109160136	30.8	1e-07	-	calmodulin-3-like	K02183	calmodulin	-	ini04016	MAPK signaling pathway - plant	Environmental Information Processing	Signal transduction
TRINITY_DN13875_c0_g2	ini:109160136	30.8	1e-07	-	calmodulin-3-like	K02183	calmodulin	-	ini04070	Phosphatidylinositol signaling system	Environmental Information Processing	Signal transduction
TRINITY_DN13875_c0_g2	ini:109160136	30.8	1e-07	-	calmodulin-3-like	K02183	calmodulin	-	ini04626	Plant-pathogen interaction	Organismal Systems	Environmental adaptation
TRINITY_DN13878_c1_g1	olu:OSTLU_39605	42	9.7e-51	NA	NA	NA	NA	NA	NA	NA	NA	NA
TRINITY_DN13878_c1_g2	osa:4333998	31.5	1e-118	NA	NA	NA	NA	NA	NA	NA	NA	NA
TRINITY_DN13879_c2_g6	egr:104433660	44.8	8.4e-183	-	mannosyl-oligosaccharide glucosidase GCS1	K01228	mannosyl-oligosaccharide glucosidase	EC:3.2.1.106	egr00510	N-Glycan biosynthesis	Metabolism	Glycan biosynthesis and metabolism
TRINITY_DN13879_c2_g6	egr:104433660	44.8	8.4e-183	-	mannosyl-oligosaccharide glucosidase GCS1	K01228	mannosyl-oligosaccharide glucosidase	EC:3.2.1.106	egr04141	Protein processing in endoplasmic reticulum	Genetic Information Processing	Folding, sorting and degradation
TRINITY_DN13881_c1_g1	fve:101311565	31.2	5.8e-50	NA	NA	NA	NA	NA	NA	NA	NA	NA
TRINITY_DN13884_c4_g4	thj:104799884	63.9	8.4e-07	NA	NA	NA	NA	NA	NA	NA	NA	NA
TRINITY_DN13884_c5_g2	smo:SELMODRAFT_440157	29.5	1.1e-23	NA	NA	NA	NA	NA	NA	NA	NA	NA
TRINITY_DN13891_c3_g1	sind:105170970	43.3	1.2e-114	NA	NA	NA	NA	NA	NA	NA	NA	NA
TRINITY_DN13893_c2_g1	smo:SELMODRAFT_268311	54.4	2.1e-62	-	hypothetical protein	K09584	protein disulfide-isomerase A6	EC:5.3.4.1	smo04141	Protein processing in endoplasmic reticulum	Genetic Information Processing	Folding, sorting and degradation
TRINITY_DN13893_c2_g2	ccp:CHC_T00009389001	33.1	4.4e-66	-	Protein disulfide-isomerase	K09580	protein disulfide-isomerase A1	EC:5.3.4.1	ccp04141	Protein processing in endoplasmic reticulum	Genetic Information Processing	Folding, sorting and degradation
TRINITY_DN13893_c2_g3	cann:107864114	30	1.3e-60	-	probable linoleate 9S-lipoxygenase 5	K15718	linoleate 9S-lipoxygenase	EC:1.13.11.58	cann00591	Linoleic acid metabolism	Metabolism	Lipid metabolism
TRINITY_DN13893_c3_g4	han:110926307	25.9	8.6e-06	-	syntaxin-22-like isoform X1	K08488	syntaxin 7	-	han04130	SNARE interactions in vesicular transport	Genetic Information Processing	Folding, sorting and degradation
TRINITY_DN13893_c3_g4	han:110926307	25.9	8.6e-06	-	syntaxin-22-like isoform X1	K08488	syntaxin 7	-	han04145	Phagosome	Cellular Processes	Transport and catabolism
TRINITY_DN13894_c0_g1	ota:OT_ostta07g01975	67.2	4.2e-15	-	V-ATPase proteolipid subunit	K02155	V-type H+-transporting ATPase 16kDa proteolipid subunit	-	ota00190	Oxidative phosphorylation	Metabolism	Energy metabolism
TRINITY_DN13894_c0_g1	ota:OT_ostta07g01975	67.2	4.2e-15	-	V-ATPase proteolipid subunit	K02155	V-type H+-transporting ATPase 16kDa proteolipid subunit	-	ota04145	Phagosome	Cellular Processes	Transport and catabolism
TRINITY_DN13896_c2_g4	mpp:MICPUCDRAFT_25279	46.1	1.5e-56	NA	NA	NA	NA	NA	NA	NA	NA	NA
TRINITY_DN13897_c0_g2	smo:SELMODRAFT_232756	56.4	1.2e-30	-	hypothetical protein	K03113	translation initiation factor 1	-	smo03013	RNA transport	Genetic Information Processing	Translation
TRINITY_DN13898_c3_g2	csl:COCSUDRAFT_48149	24.3	1.9e-07	-	SAICAR synthase-like protein	K00915	inositol-polyphosphate multikinase	EC:2.7.1.140 2.7.1.151	csl00562	Inositol phosphate metabolism	Metabolism	Carbohydrate metabolism
TRINITY_DN13898_c3_g2	csl:COCSUDRAFT_48149	24.3	1.9e-07	-	SAICAR synthase-like protein	K00915	inositol-polyphosphate multikinase	EC:2.7.1.140 2.7.1.151	csl04070	Phosphatidylinositol signaling system	Environmental Information Processing	Signal transduction
TRINITY_DN13905_c3_g1	spen:107023136	36.6	2.2e-14	NA	NA	NA	NA	NA	NA	NA	NA	NA
TRINITY_DN13909_c0_g1	dct:110099696	63.3	1.7e-10	-	uncharacterized protein LOC110099696	K02948	small subunit ribosomal protein S11	-	dct03010	Ribosome	Genetic Information Processing	Translation
TRINITY_DN13910_c0_g1	gra:105773248	35.6	1.9e-20	NA	NA	NA	NA	NA	NA	NA	NA	NA
TRINITY_DN13911_c1_g1	pxb:103962910	47.1	1.8e-43	-	kinesin-like protein KIN-1	K10396	kinesin family member 5	-	pxb04144	Endocytosis	Cellular Processes	Transport and catabolism
TRINITY_DN13912_c0_g1	nnu:104613184	53.6	4.9e-22	-	rac-like GTP-binding protein RAC2	K04392	Ras-related C3 botulinum toxin substrate 1	-	nnu04145	Phagosome	Cellular Processes	Transport and catabolism
TRINITY_DN13912_c0_g1	nnu:104613184	53.6	4.9e-22	-	rac-like GTP-binding protein RAC2	K04392	Ras-related C3 botulinum toxin substrate 1	-	nnu04933	AGE-RAGE signaling pathway in diabetic complications	Human Diseases	Endocrine and metabolic diseases
TRINITY_DN13912_c1_g1	fve:101314965	61.1	1.3e-62	-	rac-like GTP-binding protein RAC2	K04392	Ras-related C3 botulinum toxin substrate 1	-	fve04145	Phagosome	Cellular Processes	Transport and catabolism
TRINITY_DN13912_c1_g1	fve:101314965	61.1	1.3e-62	-	rac-like GTP-binding protein RAC2	K04392	Ras-related C3 botulinum toxin substrate 1	-	fve04933	AGE-RAGE signaling pathway in diabetic complications	Human Diseases	Endocrine and metabolic diseases
TRINITY_DN13916_c0_g3	smo:SELMODRAFT_429199	27.7	7.3e-12	-	hypothetical protein	K12818	ATP-dependent RNA helicase DHX8/PRP22	EC:3.6.4.13	smo03040	Spliceosome	Genetic Information Processing	Transcription
TRINITY_DN13917_c0_g1	sbi:8056061	39.6	1.3e-15	NA	NA	NA	NA	NA	NA	NA	NA	NA
TRINITY_DN13920_c0_g2	sind:105155781	56.2	4.3e-79	-	proteasome subunit alpha type-3	K02727	20S proteasome subunit alpha 7	EC:3.4.25.1	sind03050	Proteasome	Genetic Information Processing	Folding, sorting and degradation
TRINITY_DN13923_c0_g7	atr:18441573	49.7	1.1e-150	-	pre-mRNA-processing factor 17	K12816	pre-mRNA-processing factor 17	-	atr03040	Spliceosome	Genetic Information Processing	Transcription
TRINITY_DN13928_c1_g4	csl:COCSUDRAFT_83706	30	1.6e-15	NA	NA	NA	NA	NA	NA	NA	NA	NA
TRINITY_DN13929_c0_g1	gra:105798937	33.8	7.1e-11	NA	NA	NA	NA	NA	NA	NA	NA	NA
TRINITY_DN13930_c3_g6	ccp:CHC_T00000511001	58.9	2.7e-30	NA	NA	NA	NA	NA	NA	NA	NA	NA
TRINITY_DN13931_c3_g3	gra:105777833	27.7	7.2e-29	NA	NA	NA	NA	NA	NA	NA	NA	NA
TRINITY_DN13936_c1_g2	dct:110108818	29.9	7.3e-24	-	RNA-binding protein 25 isoform X1	K12822	RNA-binding protein 25	-	dct03040	Spliceosome	Genetic Information Processing	Transcription
TRINITY_DN13937_c0_g1	olu:OSTLU_26031	56.3	2.7e-15	-	predicted protein	K12196	vacuolar protein-sorting-associated protein 4	-	olu04144	Endocytosis	Cellular Processes	Transport and catabolism
TRINITY_DN13937_c0_g3	bpg:Bathy11g00320	47.2	5.2e-34	-	hypothetical protein	K12196	vacuolar protein-sorting-associated protein 4	-	bpg04144	Endocytosis	Cellular Processes	Transport and catabolism
TRINITY_DN13937_c0_g4	vcn:VOLCADRAFT_74263	61.7	8.8e-28	-	hypothetical protein	K12196	vacuolar protein-sorting-associated protein 4	-	vcn04144	Endocytosis	Cellular Processes	Transport and catabolism
TRINITY_DN13938_c0_g2	thj:104812362	45.4	2.4e-67	-	thiosulfate/3-mercaptopyruvate sulfurtransferase 1	K01011	thiosulfate/3-mercaptopyruvate sulfurtransferase	EC:2.8.1.1 2.8.1.2	thj00920	Sulfur metabolism	Metabolism	Energy metabolism
TRINITY_DN13938_c0_g2	thj:104812362	45.4	2.4e-67	-	thiosulfate/3-mercaptopyruvate sulfurtransferase 1	K01011	thiosulfate/3-mercaptopyruvate sulfurtransferase	EC:2.8.1.1 2.8.1.2	thj00270	Cysteine and methionine metabolism	Metabolism	Amino acid metabolism
TRINITY_DN13938_c0_g2	thj:104812362	45.4	2.4e-67	-	thiosulfate/3-mercaptopyruvate sulfurtransferase 1	K01011	thiosulfate/3-mercaptopyruvate sulfurtransferase	EC:2.8.1.1 2.8.1.2	thj04122	Sulfur relay system	Genetic Information Processing	Folding, sorting and degradation
TRINITY_DN13942_c0_g3	smo:SELMODRAFT_151778	54.8	2.5e-90	-	hypothetical protein	K13137	serine-threonine kinase receptor-associated protein	-	smo03013	RNA transport	Genetic Information Processing	Translation
TRINITY_DN13942_c0_g4	cvr:CHLNCDRAFT_56335	58.7	7.1e-103	NA	NA	NA	NA	NA	NA	NA	NA	NA
TRINITY_DN13945_c0_g3	han:110900222	84.7	1.4e-43	-	40S ribosomal protein S15-4	K02958	small subunit ribosomal protein S15e	-	han03010	Ribosome	Genetic Information Processing	Translation
TRINITY_DN13945_c1_g2	ats:109781491	45.7	4.8e-168	LOC109781491	glutamate--tRNA ligase, cytoplasmic-like isoform X1	K01885	glutamyl-tRNA synthetase	EC:6.1.1.17	ats00860	Porphyrin and chlorophyll metabolism	Metabolism	Metabolism of cofactors and vitamins
TRINITY_DN13945_c1_g2	ats:109781491	45.7	4.8e-168	LOC109781491	glutamate--tRNA ligase, cytoplasmic-like isoform X1	K01885	glutamyl-tRNA synthetase	EC:6.1.1.17	ats00970	Aminoacyl-tRNA biosynthesis	Genetic Information Processing	Translation
TRINITY_DN13945_c1_g3	cit:102619621	58.5	1.2e-170	-	proline--tRNA ligase	K01881	prolyl-tRNA synthetase	EC:6.1.1.15	cit00970	Aminoacyl-tRNA biosynthesis	Genetic Information Processing	Translation
TRINITY_DN13946_c0_g1	osa:4336202	37.9	4.9e-47	-	very-long-chain 3-oxoacyl-CoA reductase 1	K10251	17beta-estradiol 17-dehydrogenase / very-long-chain 3-oxoacyl-CoA reductase	EC:1.1.1.62 1.1.1.330	osa00062	Fatty acid elongation	Metabolism	Lipid metabolism
TRINITY_DN13946_c0_g1	osa:4336202	37.9	4.9e-47	-	very-long-chain 3-oxoacyl-CoA reductase 1	K10251	17beta-estradiol 17-dehydrogenase / very-long-chain 3-oxoacyl-CoA reductase	EC:1.1.1.62 1.1.1.330	osa01040	Biosynthesis of unsaturated fatty acids	Metabolism	Lipid metabolism
TRINITY_DN13949_c1_g3	gsl:Gasu_27220	65.9	1.5e-108	-	NADH dehydrogenase (ubiquinone) Fe-S protein 2	K03935	NADH dehydrogenase (ubiquinone) Fe-S protein 2	EC:1.6.5.3 1.6.99.3	gsl00190	Oxidative phosphorylation	Metabolism	Energy metabolism
TRINITY_DN13949_c1_g9	csl:CospCoM_p19	69.9	6.8e-56	nad7	NADH dehydrogenase subunit 7	K03935	NADH dehydrogenase (ubiquinone) Fe-S protein 2	EC:1.6.5.3 1.6.99.3	csl00190	Oxidative phosphorylation	Metabolism	Energy metabolism
TRINITY_DN13950_c0_g15	thj:104825605	88	5.3e-32	-	uncharacterized protein LOC104825605	K02954	small subunit ribosomal protein S14	-	thj03010	Ribosome	Genetic Information Processing	Translation
TRINITY_DN13950_c0_g6	bna:4237888	100	1.4e-21	nad1	NADH dehydrogenase subunit 1	K03878	NADH-ubiquinone oxidoreductase chain 1	EC:1.6.5.3	bna00190	Oxidative phosphorylation	Metabolism	Energy metabolism
TRINITY_DN13950_c0_g8	ath:ArthMp109	100	5.1e-50	cox1	cytochrome c oxidase subunit 1	K02256	cytochrome c oxidase subunit 1	EC:1.9.3.1	ath00190	Oxidative phosphorylation	Metabolism	Energy metabolism
TRINITY_DN13953_c0_g5	bpg:Bathy12g01440	56.6	4.5e-23	-	50S ribosomal protein L20	K02887	large subunit ribosomal protein L20	-	bpg03010	Ribosome	Genetic Information Processing	Translation
TRINITY_DN13953_c1_g2	zma:100193557	51.1	1.2e-31	-	Transducin family protein / WD-40 repeat family protein	K14555	U3 small nucleolar RNA-associated protein 13	-	zma03008	Ribosome biogenesis in eukaryotes	Genetic Information Processing	Translation
TRINITY_DN13953_c2_g1	cre:CHLREDRAFT_101935	39.6	1.6e-29	PDE1	3',5'-cyclic-nucleotide phosphodiesterase	K18437	high affinity cAMP-specific and IBMX-insensitive 3',5'-cyclic phosphodiesterase 8	EC:3.1.4.53	cre00230	Purine metabolism	Metabolism	Nucleotide metabolism
TRINITY_DN13954_c3_g2	mis:MICPUN_104608	63.2	1.2e-49	NA	NA	NA	NA	NA	NA	NA	NA	NA
TRINITY_DN13955_c1_g2	pavi:110758922	39.2	5e-31	NA	NA	NA	NA	NA	NA	NA	NA	NA
TRINITY_DN13957_c0_g1	mtr:MTR_3g091620	37.7	4.7e-07	NA	NA	NA	NA	NA	NA	NA	NA	NA
TRINITY_DN13962_c2_g7	lja:Lj5g3v1914090.1	45	9.1e-73	NA	NA	NA	NA	NA	NA	NA	NA	NA
TRINITY_DN13963_c0_g3	soe:110797498	30.5	2.3e-33	NA	NA	NA	NA	NA	NA	NA	NA	NA
TRINITY_DN13969_c0_g1	jcu:105638037	37.4	7.5e-71	-	alpha-aminoadipic semialdehyde synthase isoform X1	K14157	alpha-aminoadipic semialdehyde synthase	EC:1.5.1.8 1.5.1.9	jcu00310	Lysine degradation	Metabolism	Amino acid metabolism
TRINITY_DN13971_c3_g3	aly:ARALYDRAFT_483476	39.6	1.4e-11	-	signal recognition particle 14 kDa family protein	K03104	signal recognition particle subunit SRP14	-	aly03060	Protein export	Genetic Information Processing	Folding, sorting and degradation
TRINITY_DN13971_c4_g11	mtr:MTR_5g022560	51.5	7.3e-73	NA	NA	NA	NA	NA	NA	NA	NA	NA
TRINITY_DN13971_c4_g3	sly:101246133	36.4	5.8e-44	-	calcium-dependent protein kinase 29	K13412	calcium-dependent protein kinase	EC:2.7.11.1	sly04626	Plant-pathogen interaction	Organismal Systems	Environmental adaptation
TRINITY_DN13971_c4_g5	ccp:CHC_T00009135001	47.8	1.3e-20	-	Acyl carrier protein	K03955	NADH dehydrogenase (ubiquinone) 1 alpha/beta subcomplex 1	-	ccp00190	Oxidative phosphorylation	Metabolism	Energy metabolism
TRINITY_DN13973_c4_g2	csl:COCSUDRAFT_66597	23.6	1.8e-37	-	NIC-domain-containing protein	K14309	nuclear pore complex protein Nup93	-	csl03013	RNA transport	Genetic Information Processing	Translation
TRINITY_DN13978_c2_g3	csat:104779425	39.8	1.9e-34	-	probable ribose-5-phosphate isomerase 2	K01807	ribose 5-phosphate isomerase A	EC:5.3.1.6	csat00030	Pentose phosphate pathway	Metabolism	Carbohydrate metabolism
TRINITY_DN13978_c2_g3	csat:104779425	39.8	1.9e-34	-	probable ribose-5-phosphate isomerase 2	K01807	ribose 5-phosphate isomerase A	EC:5.3.1.6	csat00710	Carbon fixation in photosynthetic organisms	Metabolism	Energy metabolism
TRINITY_DN13982_c0_g1	mpp:MICPUCDRAFT_36034	45.5	2e-59	NA	NA	NA	NA	NA	NA	NA	NA	NA
TRINITY_DN13983_c2_g1	sind:105155582	33.5	1.8e-11	NA	NA	NA	NA	NA	NA	NA	NA	NA
TRINITY_DN13983_c3_g2	cre:CHLREDRAFT_98642	31.6	1.3e-32	NA	NA	NA	NA	NA	NA	NA	NA	NA
TRINITY_DN13983_c3_g5	cvr:CHLNCDRAFT_57159	26.6	5e-14	NA	NA	NA	NA	NA	NA	NA	NA	NA
TRINITY_DN13984_c0_g1	jcu:105631853	46.3	1.4e-13	-	serine/arginine-rich SC35-like splicing factor SCL28	K12900	FUS-interacting serine-arginine-rich protein 1	-	jcu03040	Spliceosome	Genetic Information Processing	Transcription
TRINITY_DN13986_c0_g2	mpp:MICPUCDRAFT_17217	50.5	1.7e-21	NA	NA	NA	NA	NA	NA	NA	NA	NA
TRINITY_DN13986_c0_g6	sly:101243636	46.9	2.8e-188	-	DNA replication licensing factor MCM7-like protein	K02210	DNA replication licensing factor MCM7	EC:3.6.4.12	sly03030	DNA replication	Genetic Information Processing	Replication and repair
TRINITY_DN13987_c2_g1	mcha:111005171	30.1	4.5e-36	-	THO complex subunit 5B	K13174	THO complex subunit 5	-	mcha03013	RNA transport	Genetic Information Processing	Translation
TRINITY_DN13987_c2_g16	nnu:20835001	51.9	7.3e-11	rps11	ribosomal protein S11	K02948	small subunit ribosomal protein S11	-	nnu03010	Ribosome	Genetic Information Processing	Translation
TRINITY_DN13987_c2_g3	mis:MICPUN_81963	49.9	2.8e-104	-	predicted protein	K01754	threonine dehydratase	EC:4.3.1.19	mis00260	Glycine, serine and threonine metabolism	Metabolism	Amino acid metabolism
TRINITY_DN13987_c2_g3	mis:MICPUN_81963	49.9	2.8e-104	-	predicted protein	K01754	threonine dehydratase	EC:4.3.1.19	mis00290	Valine, leucine and isoleucine biosynthesis	Metabolism	Amino acid metabolism
TRINITY_DN13987_c2_g9	thj:32981768	47	6.2e-08	rps11	ribosomal protein S11	K02948	small subunit ribosomal protein S11	-	thj03010	Ribosome	Genetic Information Processing	Translation
TRINITY_DN13990_c3_g3	ccp:CHC_T00004435001	38.1	1.5e-70	-	hypothetical protein	K13506	glycerol-3-phosphate O-acyltransferase 3/4	EC:2.3.1.15	ccp00561	Glycerolipid metabolism	Metabolism	Lipid metabolism
TRINITY_DN13990_c3_g3	ccp:CHC_T00004435001	38.1	1.5e-70	-	hypothetical protein	K13506	glycerol-3-phosphate O-acyltransferase 3/4	EC:2.3.1.15	ccp00564	Glycerophospholipid metabolism	Metabolism	Lipid metabolism
TRINITY_DN13992_c0_g3	aip:107617368	60.7	3.6e-155	-	signal recognition particle 54 kDa protein 2 isoform X1	K03106	signal recognition particle subunit SRP54	EC:3.6.5.4	aip03060	Protein export	Genetic Information Processing	Folding, sorting and degradation
TRINITY_DN13994_c4_g1	sind:105172917	48	1.1e-19	NA	NA	NA	NA	NA	NA	NA	NA	NA
TRINITY_DN13997_c0_g1	cre:CHLREDRAFT_149388	57.9	1.4e-34	NA	NA	NA	NA	NA	NA	NA	NA	NA
TRINITY_DN13999_c1_g1	mng:MNEG_0228	30.8	8.2e-12	NA	NA	NA	NA	NA	NA	NA	NA	NA
TRINITY_DN14000_c0_g1	han:110886898	34.1	4.3e-34	-	3-oxoacyl-[acyl-carrier-protein] reductase 4-like	K00059	3-oxoacyl-[acyl-carrier protein] reductase	EC:1.1.1.100	han00061	Fatty acid biosynthesis	Metabolism	Lipid metabolism
TRINITY_DN14000_c0_g1	han:110886898	34.1	4.3e-34	-	3-oxoacyl-[acyl-carrier-protein] reductase 4-like	K00059	3-oxoacyl-[acyl-carrier protein] reductase	EC:1.1.1.100	han01040	Biosynthesis of unsaturated fatty acids	Metabolism	Lipid metabolism
TRINITY_DN14000_c0_g1	han:110886898	34.1	4.3e-34	-	3-oxoacyl-[acyl-carrier-protein] reductase 4-like	K00059	3-oxoacyl-[acyl-carrier protein] reductase	EC:1.1.1.100	han00780	Biotin metabolism	Metabolism	Metabolism of cofactors and vitamins
TRINITY_DN14000_c0_g1	han:110886898	34.1	4.3e-34	-	3-oxoacyl-[acyl-carrier-protein] reductase 4-like	K00059	3-oxoacyl-[acyl-carrier protein] reductase	EC:1.1.1.100	han00333	Prodigiosin biosyntheses	Metabolism	Biosynthesis of other secondary metabolites
TRINITY_DN14007_c0_g1	aip:110266878	60	2.3e-07	-	uncharacterized protein LOC110266878	K02108	F-type H+-transporting ATPase subunit a	-	aip00190	Oxidative phosphorylation	Metabolism	Energy metabolism
TRINITY_DN14007_c0_g1	aip:110266878	60	2.3e-07	-	uncharacterized protein LOC110266878	K02108	F-type H+-transporting ATPase subunit a	-	aip00195	Photosynthesis	Metabolism	Energy metabolism
TRINITY_DN14008_c0_g3	mng:MNEG_0545	34.3	6.4e-17	NA	NA	NA	NA	NA	NA	NA	NA	NA
TRINITY_DN14008_c0_g5	ccp:CHC_T00008727001	24.5	9.1e-16	-	aminomethyltransferase	K00605	aminomethyltransferase	EC:2.1.2.10	ccp00630	Glyoxylate and dicarboxylate metabolism	Metabolism	Carbohydrate metabolism
TRINITY_DN14008_c0_g5	ccp:CHC_T00008727001	24.5	9.1e-16	-	aminomethyltransferase	K00605	aminomethyltransferase	EC:2.1.2.10	ccp00260	Glycine, serine and threonine metabolism	Metabolism	Amino acid metabolism
TRINITY_DN14008_c0_g5	ccp:CHC_T00008727001	24.5	9.1e-16	-	aminomethyltransferase	K00605	aminomethyltransferase	EC:2.1.2.10	ccp00670	One carbon pool by folate	Metabolism	Metabolism of cofactors and vitamins
TRINITY_DN14008_c0_g6	han:110913043	36.1	1.3e-42	-	mRNA-decapping enzyme subunit 2	K12613	mRNA-decapping enzyme subunit 2	EC:3.6.1.62	han03018	RNA degradation	Genetic Information Processing	Folding, sorting and degradation
TRINITY_DN14009_c2_g2	bvg:104901800	39.9	1.4e-63	-	leucine aminopeptidase 1-like	K01255	leucyl aminopeptidase	EC:3.4.11.1	bvg00480	Glutathione metabolism	Metabolism	Metabolism of other amino acids
TRINITY_DN14010_c1_g1	thj:104800956	28.5	3.6e-27	NA	NA	NA	NA	NA	NA	NA	NA	NA
TRINITY_DN14010_c2_g1	pavi:110750614	36.4	4.1e-40	-	RNA polymerase II transcription factor B subunit 4	K03143	transcription initiation factor TFIIH subunit 3	-	pavi03022	Basal transcription factors	Genetic Information Processing	Transcription
TRINITY_DN14010_c2_g1	pavi:110750614	36.4	4.1e-40	-	RNA polymerase II transcription factor B subunit 4	K03143	transcription initiation factor TFIIH subunit 3	-	pavi03420	Nucleotide excision repair	Genetic Information Processing	Replication and repair
TRINITY_DN14012_c1_g4	jcu:105634507	40.3	6.3e-22	-	pathogenesis-related protein 1	K13449	pathogenesis-related protein 1	-	jcu04016	MAPK signaling pathway - plant	Environmental Information Processing	Signal transduction
TRINITY_DN14012_c1_g4	jcu:105634507	40.3	6.3e-22	-	pathogenesis-related protein 1	K13449	pathogenesis-related protein 1	-	jcu04075	Plant hormone signal transduction	Environmental Information Processing	Signal transduction
TRINITY_DN14012_c1_g4	jcu:105634507	40.3	6.3e-22	-	pathogenesis-related protein 1	K13449	pathogenesis-related protein 1	-	jcu04626	Plant-pathogen interaction	Organismal Systems	Environmental adaptation
TRINITY_DN14013_c1_g1	ats:109757857	48.8	2.2e-10	NA	NA	NA	NA	NA	NA	NA	NA	NA
TRINITY_DN14016_c2_g3	gsl:Gasu_20540	38.9	2.9e-58	NA	NA	NA	NA	NA	NA	NA	NA	NA
TRINITY_DN14017_c1_g3	smo:SELMODRAFT_164833	45	1.2e-167	NA	NA	NA	NA	NA	NA	NA	NA	NA
TRINITY_DN14019_c4_g1	ats:109745427	30.9	1.6e-06	NA	NA	NA	NA	NA	NA	NA	NA	NA
TRINITY_DN14020_c1_g2	vcn:VOLCADRAFT_30475	30.3	7.7e-37	NA	NA	NA	NA	NA	NA	NA	NA	NA
TRINITY_DN14020_c1_g4	zju:107403544	24.4	1.9e-24	NA	NA	NA	NA	NA	NA	NA	NA	NA
TRINITY_DN14023_c3_g1	ghi:107912409	30.5	2.1e-13	NA	NA	NA	NA	NA	NA	NA	NA	NA
TRINITY_DN14028_c0_g1	cre:CHLREDRAFT_188957	31.7	1.8e-13	-	predicted protein	K10582	ubiquitin-conjugating enzyme E2 Q	EC:2.3.2.23	cre04120	Ubiquitin mediated proteolysis	Genetic Information Processing	Folding, sorting and degradation
TRINITY_DN14028_c1_g1	gsl:Gasu_36290	43.5	4.7e-84	NA	NA	NA	NA	NA	NA	NA	NA	NA
TRINITY_DN1402_c0_g1	nto:104106842	26.3	8.7e-21	-	translation initiation factor eIF-2B subunit gamma	K03241	translation initiation factor eIF-2B subunit gamma	-	nto03013	RNA transport	Genetic Information Processing	Translation
TRINITY_DN14030_c4_g1	mis:MICPUN_81470	55.1	4.8e-36	NA	NA	NA	NA	NA	NA	NA	NA	NA
TRINITY_DN14030_c6_g3	pxb:103942633	60.4	4.7e-42	NA	NA	NA	NA	NA	NA	NA	NA	NA
TRINITY_DN14031_c0_g3	egu:105055153	31.6	5.4e-34	NA	NA	NA	NA	NA	NA	NA	NA	NA
TRINITY_DN14032_c0_g5	pxb:103942704	52.3	6.4e-51	-	DNA replication licensing factor Mcm2-like	K02540	DNA replication licensing factor MCM2	EC:3.6.4.12	pxb03030	DNA replication	Genetic Information Processing	Replication and repair
TRINITY_DN14034_c0_g3	ccp:CHC_T00008873001	32.7	4.2e-59	NA	NA	NA	NA	NA	NA	NA	NA	NA
TRINITY_DN14036_c3_g1	bvg:104899575	34.8	1.7e-82	-	signal recognition particle subunit SRP68	K03107	signal recognition particle subunit SRP68	-	bvg03060	Protein export	Genetic Information Processing	Folding, sorting and degradation
TRINITY_DN14040_c0_g1	lang:109342765	49	1e-50	NA	NA	NA	NA	NA	NA	NA	NA	NA
TRINITY_DN14045_c1_g2	osa:4337837	26.6	1.9e-24	NA	NA	NA	NA	NA	NA	NA	NA	NA
TRINITY_DN14046_c4_g5	brp:103845866	25.6	4.4e-144	NA	NA	NA	NA	NA	NA	NA	NA	NA
TRINITY_DN14051_c1_g2	ats:109774116	32.2	4.4e-07	NA	NA	NA	NA	NA	NA	NA	NA	NA
TRINITY_DN14051_c2_g3	bvg:104882853	44	6.3e-27	-	vacuolar protein sorting-associated protein 20 homolog 2	K12195	charged multivesicular body protein 6	-	bvg04144	Endocytosis	Cellular Processes	Transport and catabolism
TRINITY_DN14052_c0_g4	ccaj:109805612	49.5	3.7e-55	-	thymidylate kinase isoform X1	K00943	dTMP kinase	EC:2.7.4.9	ccaj00240	Pyrimidine metabolism	Metabolism	Nucleotide metabolism
TRINITY_DN14055_c3_g3	csl:COCSUDRAFT_47352	41.7	4.4e-31	NA	NA	NA	NA	NA	NA	NA	NA	NA
TRINITY_DN14057_c2_g1	mpp:MICPUCDRAFT_55020	35.8	1.2e-25	NA	NA	NA	NA	NA	NA	NA	NA	NA
TRINITY_DN14058_c0_g2	ats:109736166	64.4	5.8e-143	LOC109736166	dolichyl-diphosphooligosaccharide--protein glycosyltransferase subunit STT3B	K07151	dolichyl-diphosphooligosaccharide---protein glycosyltransferase	EC:2.4.99.18	ats00510	N-Glycan biosynthesis	Metabolism	Glycan biosynthesis and metabolism
TRINITY_DN14058_c0_g2	ats:109736166	64.4	5.8e-143	LOC109736166	dolichyl-diphosphooligosaccharide--protein glycosyltransferase subunit STT3B	K07151	dolichyl-diphosphooligosaccharide---protein glycosyltransferase	EC:2.4.99.18	ats04141	Protein processing in endoplasmic reticulum	Genetic Information Processing	Folding, sorting and degradation
TRINITY_DN14060_c1_g1	cre:CHLREDRAFT_185104	42.3	7.1e-51	NA	NA	NA	NA	NA	NA	NA	NA	NA
TRINITY_DN14060_c2_g3	obr:102713676	38.9	2.9e-35	NA	NA	NA	NA	NA	NA	NA	NA	NA
TRINITY_DN14060_c2_g8	dct:110104275	32.5	1.7e-11	NA	NA	NA	NA	NA	NA	NA	NA	NA
TRINITY_DN14062_c0_g14	soe:110775499	40.6	6e-29	NA	NA	NA	NA	NA	NA	NA	NA	NA
TRINITY_DN14062_c0_g2	dct:110098611	42.4	1.2e-44	NA	NA	NA	NA	NA	NA	NA	NA	NA
TRINITY_DN14063_c2_g6	smo:SELMODRAFT_112569	41	2e-78	-	hypothetical protein	K07407	alpha-galactosidase	EC:3.2.1.22	smo00052	Galactose metabolism	Metabolism	Carbohydrate metabolism
TRINITY_DN14063_c2_g6	smo:SELMODRAFT_112569	41	2e-78	-	hypothetical protein	K07407	alpha-galactosidase	EC:3.2.1.22	smo00561	Glycerolipid metabolism	Metabolism	Lipid metabolism
TRINITY_DN14063_c2_g6	smo:SELMODRAFT_112569	41	2e-78	-	hypothetical protein	K07407	alpha-galactosidase	EC:3.2.1.22	smo00600	Sphingolipid metabolism	Metabolism	Lipid metabolism
TRINITY_DN14063_c2_g6	smo:SELMODRAFT_112569	41	2e-78	-	hypothetical protein	K07407	alpha-galactosidase	EC:3.2.1.22	smo00603	Glycosphingolipid biosynthesis - globo and isoglobo series	Metabolism	Glycan biosynthesis and metabolism
TRINITY_DN14065_c1_g1	smo:SELMODRAFT_135318	62.8	5.1e-104	NA	NA	NA	NA	NA	NA	NA	NA	NA
TRINITY_DN14065_c2_g8	mis:MICPUN_59337	43.5	5.5e-40	-	predicted protein	K10703	very-long-chain (3R)-3-hydroxyacyl-CoA dehydratase	EC:4.2.1.134	mis00062	Fatty acid elongation	Metabolism	Lipid metabolism
TRINITY_DN14065_c2_g8	mis:MICPUN_59337	43.5	5.5e-40	-	predicted protein	K10703	very-long-chain (3R)-3-hydroxyacyl-CoA dehydratase	EC:4.2.1.134	mis01040	Biosynthesis of unsaturated fatty acids	Metabolism	Lipid metabolism
TRINITY_DN14071_c0_g3	smo:SELMODRAFT_234185	32.7	4.3e-67	NA	NA	NA	NA	NA	NA	NA	NA	NA
TRINITY_DN14071_c0_g5	mng:MNEG_14097	33.3	2.2e-09	NA	NA	NA	NA	NA	NA	NA	NA	NA
TRINITY_DN14075_c0_g1	jcu:105648736	55.9	3.4e-97	NA	NA	NA	NA	NA	NA	NA	NA	NA
TRINITY_DN14076_c3_g5	smo:SELMODRAFT_270274	49.2	2.7e-32	Rab8b-1	rab family GTPase	K07901	Ras-related protein Rab-8A	-	smo04144	Endocytosis	Cellular Processes	Transport and catabolism
TRINITY_DN14077_c0_g2	sita:101780847	53.2	2.6e-80	NA	NA	NA	NA	NA	NA	NA	NA	NA
TRINITY_DN14078_c1_g2	ota:OT_ostta17g02000	45.7	1.3e-47	-	Zinc finger	K11423	histone-lysine N-methyltransferase SETD2	EC:2.1.1.43	ota00310	Lysine degradation	Metabolism	Amino acid metabolism
TRINITY_DN14082_c0_g1	csl:COCSUDRAFT_45782	28.1	1.3e-15	-	AAA-ATPase of VPS4/SKD1 family	K12196	vacuolar protein-sorting-associated protein 4	-	csl04144	Endocytosis	Cellular Processes	Transport and catabolism
TRINITY_DN14082_c0_g2	nnu:104597177	84.6	3.4e-67	-	40S ribosomal protein S14	K02955	small subunit ribosomal protein S14e	-	nnu03010	Ribosome	Genetic Information Processing	Translation
TRINITY_DN14084_c0_g1	vcn:VOLCADRAFT_85348	28.6	6.2e-16	-	hypothetical protein	K08081	tropinone reductase I	EC:1.1.1.206	vcn00960	Tropane, piperidine and pyridine alkaloid biosynthesis	Metabolism	Biosynthesis of other secondary metabolites
TRINITY_DN14091_c0_g9	ccp:CHC_T00005933001	31.9	4.1e-06	NA	NA	NA	NA	NA	NA	NA	NA	NA
TRINITY_DN14092_c2_g1	lang:109325898	33.3	2.8e-50	-	alpha-1	K00736	alpha-1,6-mannosyl-glycoprotein beta-1,2-N-acetylglucosaminyltransferase	EC:2.4.1.143	lang00510	N-Glycan biosynthesis	Metabolism	Glycan biosynthesis and metabolism
TRINITY_DN14092_c2_g2	mtr:MTR_7g085350	51	1e-33	-	transcription regulator NOT2/NOT3/NOT5 family protein	K12580	CCR4-NOT transcription complex subunit 3	-	mtr03018	RNA degradation	Genetic Information Processing	Folding, sorting and degradation
TRINITY_DN14094_c1_g11	zju:107406395	33.7	1.5e-41	-	phosphatidylinositol 4-phosphate 5-kinase 9-like	K00889	1-phosphatidylinositol-4-phosphate 5-kinase	EC:2.7.1.68	zju00562	Inositol phosphate metabolism	Metabolism	Carbohydrate metabolism
TRINITY_DN14094_c1_g11	zju:107406395	33.7	1.5e-41	-	phosphatidylinositol 4-phosphate 5-kinase 9-like	K00889	1-phosphatidylinositol-4-phosphate 5-kinase	EC:2.7.1.68	zju04070	Phosphatidylinositol signaling system	Environmental Information Processing	Signal transduction
TRINITY_DN14094_c1_g11	zju:107406395	33.7	1.5e-41	-	phosphatidylinositol 4-phosphate 5-kinase 9-like	K00889	1-phosphatidylinositol-4-phosphate 5-kinase	EC:2.7.1.68	zju04144	Endocytosis	Cellular Processes	Transport and catabolism
TRINITY_DN14097_c0_g3	bna:106380468	56.9	9.6e-60	-	DNA replication licensing factor MCM2	K02540	DNA replication licensing factor MCM2	EC:3.6.4.12	bna03030	DNA replication	Genetic Information Processing	Replication and repair
TRINITY_DN14098_c0_g1	thj:104815498	36.3	8e-38	-	phosphatidylserine decarboxylase proenzyme 1	K01613	phosphatidylserine decarboxylase	EC:4.1.1.65	thj00564	Glycerophospholipid metabolism	Metabolism	Lipid metabolism
TRINITY_DN14099_c1_g2	gsl:Gasu_41310	41.8	4.1e-31	NA	NA	NA	NA	NA	NA	NA	NA	NA
TRINITY_DN14102_c5_g1	ini:109188769	62.7	2.8e-25	-	ADP-ribosylation factor 1-like	K07937	ADP-ribosylation factor 1	-	ini04144	Endocytosis	Cellular Processes	Transport and catabolism
TRINITY_DN14106_c0_g1	ath:AT1G55300	29.9	5.5e-10	TAF7	TBP-associated factor 7	K03132	transcription initiation factor TFIID subunit 7	-	ath03022	Basal transcription factors	Genetic Information Processing	Transcription
TRINITY_DN14108_c0_g3	mdm:103444978	32	6.4e-20	NA	NA	NA	NA	NA	NA	NA	NA	NA
TRINITY_DN14109_c2_g3	bdi:100833690	38.6	1.1e-47	NA	NA	NA	NA	NA	NA	NA	NA	NA
TRINITY_DN14114_c3_g3	gmx:100819760	64.3	3.1e-76	NA	NA	NA	NA	NA	NA	NA	NA	NA
TRINITY_DN14116_c0_g1	rcu:8262555	57.6	2e-19	NA	NA	NA	NA	NA	NA	NA	NA	NA
TRINITY_DN14116_c0_g3	olu:OSTLU_3606	29.6	3.3e-17	NA	NA	NA	NA	NA	NA	NA	NA	NA
TRINITY_DN14119_c0_g2	cme:CYME_CMQ436C	53.8	1.9e-106	-	glycolate oxidase	K11517	(S)-2-hydroxy-acid oxidase	EC:1.1.3.15	cme00630	Glyoxylate and dicarboxylate metabolism	Metabolism	Carbohydrate metabolism
TRINITY_DN14119_c0_g2	cme:CYME_CMQ436C	53.8	1.9e-106	-	glycolate oxidase	K11517	(S)-2-hydroxy-acid oxidase	EC:1.1.3.15	cme04146	Peroxisome	Cellular Processes	Transport and catabolism
TRINITY_DN14120_c3_g2	ota:OT_ostta02g00940	32.1	1e-37	-	Ribose-phosphate diphosphokinase	K00948	ribose-phosphate pyrophosphokinase	EC:2.7.6.1	ota00030	Pentose phosphate pathway	Metabolism	Carbohydrate metabolism
TRINITY_DN14120_c3_g2	ota:OT_ostta02g00940	32.1	1e-37	-	Ribose-phosphate diphosphokinase	K00948	ribose-phosphate pyrophosphokinase	EC:2.7.6.1	ota00230	Purine metabolism	Metabolism	Nucleotide metabolism
TRINITY_DN14121_c3_g10	gra:105769028	35.3	3.8e-29	NA	NA	NA	NA	NA	NA	NA	NA	NA
TRINITY_DN14127_c2_g1	mng:MNEG_8326	49	4.6e-70	-	Translation initiation factor eIF-2B subunit alpha	K03239	translation initiation factor eIF-2B subunit alpha	-	mng03013	RNA transport	Genetic Information Processing	Translation
TRINITY_DN14127_c3_g1	atr:110008293	36.9	1.3e-29	-	ultraviolet-B receptor UVR8-like	K10615	E3 ubiquitin-protein ligase HERC4	EC:2.3.2.26	atr04120	Ubiquitin mediated proteolysis	Genetic Information Processing	Folding, sorting and degradation
TRINITY_DN14128_c3_g1	vcn:VOLCADRAFT_82906	45.5	8.9e-95	-	hypothetical protein	K01487	guanine deaminase	EC:3.5.4.3	vcn00230	Purine metabolism	Metabolism	Nucleotide metabolism
TRINITY_DN14128_c3_g9	csv:101212349	48.2	4.3e-98	-	26S proteasome non-ATPase regulatory subunit 6 homolog	K03037	26S proteasome regulatory subunit N7	-	csv03050	Proteasome	Genetic Information Processing	Folding, sorting and degradation
TRINITY_DN1412_c0_g1	gmx:100037470	35.7	1.3e-35	-	protein disufide isomerase-like protein	K09584	protein disulfide-isomerase A6	EC:5.3.4.1	gmx04141	Protein processing in endoplasmic reticulum	Genetic Information Processing	Folding, sorting and degradation
TRINITY_DN14131_c0_g1	cvr:CHLNCDRAFT_135218	59.9	8.6e-120	-	hypothetical protein	K07204	regulatory associated protein of mTOR	-	cvr04136	Autophagy - other eukaryotes	Cellular Processes	Transport and catabolism
TRINITY_DN14131_c0_g4	pxb:103962166	27.6	3.7e-77	-	regulatory-associated protein of TOR 1-like	K07204	regulatory associated protein of mTOR	-	pxb04136	Autophagy - other eukaryotes	Cellular Processes	Transport and catabolism
TRINITY_DN14137_c0_g1	bpg:Bathy10g00490	54.2	6.6e-12	-	hypothetical protein	K14512	mitogen-activated protein kinase 6	EC:2.7.11.24	bpg04016	MAPK signaling pathway - plant	Environmental Information Processing	Signal transduction
TRINITY_DN14137_c0_g1	bpg:Bathy10g00490	54.2	6.6e-12	-	hypothetical protein	K14512	mitogen-activated protein kinase 6	EC:2.7.11.24	bpg04075	Plant hormone signal transduction	Environmental Information Processing	Signal transduction
TRINITY_DN14137_c2_g4	mpp:MICPUCDRAFT_27380	57.9	1.8e-46	-	hypothetical protein	K14512	mitogen-activated protein kinase 6	EC:2.7.11.24	mpp04016	MAPK signaling pathway - plant	Environmental Information Processing	Signal transduction
TRINITY_DN14137_c2_g4	mpp:MICPUCDRAFT_27380	57.9	1.8e-46	-	hypothetical protein	K14512	mitogen-activated protein kinase 6	EC:2.7.11.24	mpp04075	Plant hormone signal transduction	Environmental Information Processing	Signal transduction
TRINITY_DN14137_c2_g6	lja:Lj2g3v0690050.1	53.2	2.4e-07	Lj2g3v0690050.1	-	K20538	mitogen-activated protein kinase 8	EC:2.7.11.24	lja04016	MAPK signaling pathway - plant	Environmental Information Processing	Signal transduction
TRINITY_DN14140_c0_g2	hbr:110640739	41.7	2.8e-13	-	autophagy-related protein 8C	K08341	GABA(A) receptor-associated protein	-	hbr04136	Autophagy - other eukaryotes	Cellular Processes	Transport and catabolism
TRINITY_DN14140_c0_g3	mng:MNEG_7221	70.8	3.1e-35	-	H/ACA ribonucleoprotein complex subunit 1	K11128	H/ACA ribonucleoprotein complex subunit 1	-	mng03008	Ribosome biogenesis in eukaryotes	Genetic Information Processing	Translation
TRINITY_DN14141_c0_g2	hbr:110658595	22.2	5.6e-16	-	uncharacterized protein LOC110658595	K02154	V-type H+-transporting ATPase subunit a	-	hbr00190	Oxidative phosphorylation	Metabolism	Energy metabolism
TRINITY_DN14141_c0_g2	hbr:110658595	22.2	5.6e-16	-	uncharacterized protein LOC110658595	K02154	V-type H+-transporting ATPase subunit a	-	hbr04145	Phagosome	Cellular Processes	Transport and catabolism
TRINITY_DN14142_c0_g1	mpp:MICPUCDRAFT_53634	58.7	7.2e-90	-	hypothetical protein	K01711	GDPmannose 4,6-dehydratase	EC:4.2.1.47	mpp00051	Fructose and mannose metabolism	Metabolism	Carbohydrate metabolism
TRINITY_DN14142_c0_g1	mpp:MICPUCDRAFT_53634	58.7	7.2e-90	-	hypothetical protein	K01711	GDPmannose 4,6-dehydratase	EC:4.2.1.47	mpp00520	Amino sugar and nucleotide sugar metabolism	Metabolism	Carbohydrate metabolism
TRINITY_DN14142_c0_g3	ccp:CHC_T00009339001	64.2	4.5e-224	NA	NA	NA	NA	NA	NA	NA	NA	NA
TRINITY_DN14142_c0_g6	gsl:Gasu_50880	67.9	9.3e-96	NA	NA	NA	NA	NA	NA	NA	NA	NA
TRINITY_DN14142_c0_g7	adu:107458004	30.3	2e-22	NA	NA	NA	NA	NA	NA	NA	NA	NA
TRINITY_DN14143_c1_g7	mpp:MICPUCDRAFT_49523	32.4	3.4e-09	NA	NA	NA	NA	NA	NA	NA	NA	NA
TRINITY_DN14148_c0_g1	boe:106312375	23.3	3.8e-18	NA	NA	NA	NA	NA	NA	NA	NA	NA
TRINITY_DN14149_c0_g1	ath:AT3G01650	44.6	9.8e-06	NA	NA	NA	NA	NA	NA	NA	NA	NA
TRINITY_DN14149_c0_g5	smo:SELMODRAFT_176218	37.7	1.1e-07	NA	NA	NA	NA	NA	NA	NA	NA	NA
TRINITY_DN14151_c4_g1	gsl:Gasu_50590	36.3	6.3e-34	NA	NA	NA	NA	NA	NA	NA	NA	NA
TRINITY_DN14152_c0_g3	egu:105045538	31.1	2.8e-25	-	ABC transporter A family member 1 isoform X1	K05643	ATP-binding cassette, subfamily A (ABC1), member 3	-	egu02010	ABC transporters	Environmental Information Processing	Membrane transport
TRINITY_DN14154_c0_g1	han:110910053	40.7	1.8e-44	-	long chain acyl-CoA synthetase 1-like	K01897	long-chain acyl-CoA synthetase	EC:6.2.1.3	han00061	Fatty acid biosynthesis	Metabolism	Lipid metabolism
TRINITY_DN14154_c0_g1	han:110910053	40.7	1.8e-44	-	long chain acyl-CoA synthetase 1-like	K01897	long-chain acyl-CoA synthetase	EC:6.2.1.3	han00071	Fatty acid degradation	Metabolism	Lipid metabolism
TRINITY_DN14154_c0_g1	han:110910053	40.7	1.8e-44	-	long chain acyl-CoA synthetase 1-like	K01897	long-chain acyl-CoA synthetase	EC:6.2.1.3	han04146	Peroxisome	Cellular Processes	Transport and catabolism
TRINITY_DN14156_c0_g1	spen:107024548	38.1	9.5e-54	NA	NA	NA	NA	NA	NA	NA	NA	NA
TRINITY_DN14156_c0_g2	cit:102606920	40.3	9.4e-54	-	zingipain-2 isoform X1	K01365	cathepsin L	EC:3.4.22.15	cit04145	Phagosome	Cellular Processes	Transport and catabolism
TRINITY_DN14158_c2_g3	gsl:Gasu_23880	47.5	6.4e-29	-	peptide chain release factor eRF subunit 2	K03267	peptide chain release factor subunit 3	-	gsl03015	mRNA surveillance pathway	Genetic Information Processing	Translation
TRINITY_DN14158_c2_g4	nta:107830479	45.4	6.9e-71	NA	NA	NA	NA	NA	NA	NA	NA	NA
TRINITY_DN14158_c2_g6	smo:SELMODRAFT_123370	61.7	5.9e-109	-	hypothetical protein	K03267	peptide chain release factor subunit 3	-	smo03015	mRNA surveillance pathway	Genetic Information Processing	Translation
TRINITY_DN14158_c3_g1	nnu:104606634	50	4.5e-07	NA	NA	NA	NA	NA	NA	NA	NA	NA
TRINITY_DN14161_c3_g1	cann:107870698	41.4	1.8e-27	NA	NA	NA	NA	NA	NA	NA	NA	NA
TRINITY_DN14161_c4_g1	lang:109329195	40.3	1.9e-17	NA	NA	NA	NA	NA	NA	NA	NA	NA
TRINITY_DN14162_c3_g4	cme:CYME_CMO271C	34.9	5.1e-39	NA	NA	NA	NA	NA	NA	NA	NA	NA
TRINITY_DN14163_c3_g5	han:110877803	31.6	2.3e-83	NA	NA	NA	NA	NA	NA	NA	NA	NA
TRINITY_DN14165_c0_g1	eus:EUTSA_v10023227mg	47.3	1.9e-20	NA	NA	NA	NA	NA	NA	NA	NA	NA
TRINITY_DN14168_c0_g2	atr:18429601	64.2	1.4e-67	-	1	K08967	1,2-dihydroxy-3-keto-5-methylthiopentene dioxygenase	EC:1.13.11.53 1.13.11.54	atr00270	Cysteine and methionine metabolism	Metabolism	Amino acid metabolism
TRINITY_DN14170_c0_g2	ats:109748937	69.8	1.5e-170	NA	NA	NA	NA	NA	NA	NA	NA	NA
TRINITY_DN14172_c3_g1	cre:CHLREDRAFT_159711	42.2	7.2e-17	-	predicted protein	K03872	elongin-C	-	cre04120	Ubiquitin mediated proteolysis	Genetic Information Processing	Folding, sorting and degradation
TRINITY_DN14172_c3_g2	cre:CHLREDRAFT_131998	54	8.8e-64	NA	NA	NA	NA	NA	NA	NA	NA	NA
TRINITY_DN14173_c0_g1	mpp:MICPUCDRAFT_56139	28.8	1.2e-31	-	hypothetical protein	K05289	glycosylphosphatidylinositol transamidase	-	mpp00563	Glycosylphosphatidylinositol(GPI)-anchor biosynthesis	Metabolism	Glycan biosynthesis and metabolism
TRINITY_DN14173_c1_g1	cmo:103483368	41.9	1.5e-80	NA	NA	NA	NA	NA	NA	NA	NA	NA
TRINITY_DN14175_c0_g1	nsy:104242999	28.9	2.5e-43	NA	NA	NA	NA	NA	NA	NA	NA	NA
TRINITY_DN14178_c3_g1	osa:4344833	33.9	3.6e-13	-	polyadenylation and cleavage factor homolog 4 isoform X1	K14400	pre-mRNA cleavage complex 2 protein Pcf11	-	osa03015	mRNA surveillance pathway	Genetic Information Processing	Translation
TRINITY_DN14182_c1_g1	sind:105171444	45	3.9e-44	-	brefeldin A-inhibited guanine nucleotide-exchange protein 2	K18442	brefeldin A-inhibited guanine nucleotide-exchange protein	-	sind04144	Endocytosis	Cellular Processes	Transport and catabolism
TRINITY_DN14184_c0_g2	smo:SELMODRAFT_231460	61.1	0	-	hypothetical protein	K12852	116 kDa U5 small nuclear ribonucleoprotein component	-	smo03040	Spliceosome	Genetic Information Processing	Transcription
TRINITY_DN14191_c0_g1	smo:SELMODRAFT_137987	47.6	6.6e-75	NA	NA	NA	NA	NA	NA	NA	NA	NA
TRINITY_DN14193_c0_g1	cann:107867754	72.2	1.7e-94	-	40S ribosomal protein S2-3-like	K02981	small subunit ribosomal protein S2e	-	cann03010	Ribosome	Genetic Information Processing	Translation
TRINITY_DN14194_c0_g1	var:108345887	31.7	7.5e-38	NA	NA	NA	NA	NA	NA	NA	NA	NA
TRINITY_DN14196_c0_g3	csl:COCSUDRAFT_67695	35	1.5e-23	NA	NA	NA	NA	NA	NA	NA	NA	NA
TRINITY_DN14200_c0_g3	cre:CHLREDRAFT_180221	48.5	5.2e-96	FAP67	flagellar associated protein	K00940	nucleoside-diphosphate kinase	EC:2.7.4.6	cre00230	Purine metabolism	Metabolism	Nucleotide metabolism
TRINITY_DN14200_c0_g3	cre:CHLREDRAFT_180221	48.5	5.2e-96	FAP67	flagellar associated protein	K00940	nucleoside-diphosphate kinase	EC:2.7.4.6	cre00240	Pyrimidine metabolism	Metabolism	Nucleotide metabolism
TRINITY_DN14200_c0_g3	cre:CHLREDRAFT_180221	48.5	5.2e-96	FAP67	flagellar associated protein	K00940	nucleoside-diphosphate kinase	EC:2.7.4.6	cre04016	MAPK signaling pathway - plant	Environmental Information Processing	Signal transduction
TRINITY_DN14200_c0_g5	smo:SELMODRAFT_175612	44.6	2.8e-20	NA	NA	NA	NA	NA	NA	NA	NA	NA
TRINITY_DN14201_c1_g3	bvg:104907680	58.8	1.7e-59	NA	NA	NA	NA	NA	NA	NA	NA	NA
TRINITY_DN14202_c2_g1	mng:MNEG_7925	29	1.1e-11	NA	NA	NA	NA	NA	NA	NA	NA	NA
TRINITY_DN14204_c2_g1	csl:COCSUDRAFT_67695	32.4	8.9e-06	NA	NA	NA	NA	NA	NA	NA	NA	NA
TRINITY_DN14205_c5_g1	ini:109181868	37.5	1.7e-11	-	ras-related protein RABE1c-like	K07901	Ras-related protein Rab-8A	-	ini04144	Endocytosis	Cellular Processes	Transport and catabolism
TRINITY_DN14206_c3_g1	vcn:VOLCADRAFT_81277	24.5	2.7e-23	NA	NA	NA	NA	NA	NA	NA	NA	NA
TRINITY_DN14206_c3_g6	pxb:103942503	23.7	1.1e-10	NA	NA	NA	NA	NA	NA	NA	NA	NA
TRINITY_DN14211_c1_g1	lja:Lj2g3v1242400.1	43.8	7.1e-34	NA	NA	NA	NA	NA	NA	NA	NA	NA
TRINITY_DN14211_c2_g1	cre:CHLREDRAFT_175485	62.1	6.6e-14	DNJ11	DnaJ-like protein	K09518	DnaJ homolog subfamily B member 12	-	cre04141	Protein processing in endoplasmic reticulum	Genetic Information Processing	Folding, sorting and degradation
TRINITY_DN14211_c2_g2	osa:4334073	64.8	2.5e-101	-	ATP-sulfurylase 3	K13811	3'-phosphoadenosine 5'-phosphosulfate synthase	EC:2.7.7.4 2.7.1.25	osa00920	Sulfur metabolism	Metabolism	Energy metabolism
TRINITY_DN14211_c2_g2	osa:4334073	64.8	2.5e-101	-	ATP-sulfurylase 3	K13811	3'-phosphoadenosine 5'-phosphosulfate synthase	EC:2.7.7.4 2.7.1.25	osa00230	Purine metabolism	Metabolism	Nucleotide metabolism
TRINITY_DN14211_c2_g2	osa:4334073	64.8	2.5e-101	-	ATP-sulfurylase 3	K13811	3'-phosphoadenosine 5'-phosphosulfate synthase	EC:2.7.7.4 2.7.1.25	osa00450	Selenocompound metabolism	Metabolism	Metabolism of other amino acids
TRINITY_DN14211_c2_g2	osa:4334073	64.8	2.5e-101	-	ATP-sulfurylase 3	K13811	3'-phosphoadenosine 5'-phosphosulfate synthase	EC:2.7.7.4 2.7.1.25	osa00261	Monobactam biosynthesis	Metabolism	Biosynthesis of other secondary metabolites
TRINITY_DN14212_c0_g1	han:110901420	27	1.3e-21	NA	NA	NA	NA	NA	NA	NA	NA	NA
TRINITY_DN14215_c0_g1	atr:18444788	37.4	1.2e-105	-	beta-galactosidase 8 isoform X2	K12309	beta-galactosidase	EC:3.2.1.23	atr00052	Galactose metabolism	Metabolism	Carbohydrate metabolism
TRINITY_DN14215_c0_g1	atr:18444788	37.4	1.2e-105	-	beta-galactosidase 8 isoform X2	K12309	beta-galactosidase	EC:3.2.1.23	atr00600	Sphingolipid metabolism	Metabolism	Lipid metabolism
TRINITY_DN14215_c0_g1	atr:18444788	37.4	1.2e-105	-	beta-galactosidase 8 isoform X2	K12309	beta-galactosidase	EC:3.2.1.23	atr00531	Glycosaminoglycan degradation	Metabolism	Glycan biosynthesis and metabolism
TRINITY_DN14215_c0_g1	atr:18444788	37.4	1.2e-105	-	beta-galactosidase 8 isoform X2	K12309	beta-galactosidase	EC:3.2.1.23	atr00604	Glycosphingolipid biosynthesis - ganglio series	Metabolism	Glycan biosynthesis and metabolism
TRINITY_DN14215_c0_g1	atr:18444788	37.4	1.2e-105	-	beta-galactosidase 8 isoform X2	K12309	beta-galactosidase	EC:3.2.1.23	atr00511	Other glycan degradation	Metabolism	Glycan biosynthesis and metabolism
TRINITY_DN14216_c0_g2	thj:104824610	34.4	4.8e-13	NA	NA	NA	NA	NA	NA	NA	NA	NA
TRINITY_DN14219_c1_g5	smo:SELMODRAFT_409411	30.8	6e-14	NA	NA	NA	NA	NA	NA	NA	NA	NA
TRINITY_DN14223_c1_g1	smo:SELMODRAFT_440252	55.4	4.4e-23	NA	NA	NA	NA	NA	NA	NA	NA	NA
TRINITY_DN14224_c0_g2	mng:MNEG_4580	29.9	6.3e-15	-	cytidylate kinase	K00939	adenylate kinase	EC:2.7.4.3	mng00230	Purine metabolism	Metabolism	Nucleotide metabolism
TRINITY_DN14224_c0_g2	mng:MNEG_4580	29.9	6.3e-15	-	cytidylate kinase	K00939	adenylate kinase	EC:2.7.4.3	mng00730	Thiamine metabolism	Metabolism	Metabolism of cofactors and vitamins
TRINITY_DN14226_c0_g3	zju:107427462	27.1	1.2e-21	-	L-galactose dehydrogenase	K17744	L-galactose dehydrogenase	EC:1.1.1.316	zju00053	Ascorbate and aldarate metabolism	Metabolism	Carbohydrate metabolism
TRINITY_DN14226_c0_g5	bvg:104906006	47.4	1.9e-23	-	transcription initiation factor TFIID subunit 10	K03134	transcription initiation factor TFIID subunit 10	-	bvg03022	Basal transcription factors	Genetic Information Processing	Transcription
TRINITY_DN14228_c0_g1	sly:101265084	34.2	6.1e-16	NA	NA	NA	NA	NA	NA	NA	NA	NA
TRINITY_DN14228_c0_g4	han:110893864	32.5	2.6e-25	-	cytochrome P450 734A1-like	K15639	PHYB activation tagged suppressor 1	EC:1.14.-.-	han00905	Brassinosteroid biosynthesis	Metabolism	Metabolism of terpenoids and polyketides
TRINITY_DN14230_c0_g2	dosa:Os11t0134400-00	42.3	6.5e-17	Os11g0134400	Calmodulin-like protein 3.	K02183	calmodulin	-	dosa04016	MAPK signaling pathway - plant	Environmental Information Processing	Signal transduction
TRINITY_DN14230_c0_g2	dosa:Os11t0134400-00	42.3	6.5e-17	Os11g0134400	Calmodulin-like protein 3.	K02183	calmodulin	-	dosa04070	Phosphatidylinositol signaling system	Environmental Information Processing	Signal transduction
TRINITY_DN14230_c0_g2	dosa:Os11t0134400-00	42.3	6.5e-17	Os11g0134400	Calmodulin-like protein 3.	K02183	calmodulin	-	dosa04626	Plant-pathogen interaction	Organismal Systems	Environmental adaptation
TRINITY_DN14235_c1_g3	cam:101497200	37.5	9.3e-43	-	small RNA degrading nuclease 5	K14570	RNA exonuclease 1	EC:3.1.-.-	cam03008	Ribosome biogenesis in eukaryotes	Genetic Information Processing	Translation
TRINITY_DN14235_c1_g6	pper:18782535	57	1.1e-37	NA	NA	NA	NA	NA	NA	NA	NA	NA
TRINITY_DN14239_c1_g3	pvu:PHAVU_009G216800g	39.1	9.1e-49	NA	NA	NA	NA	NA	NA	NA	NA	NA
TRINITY_DN14239_c1_g7	smo:SELMODRAFT_425250	29.6	2.6e-30	NA	NA	NA	NA	NA	NA	NA	NA	NA
TRINITY_DN14243_c1_g1	gsl:Gasu_41650	72	1.4e-80	-	ATP-dependent RNA helicase	K12598	ATP-dependent RNA helicase DOB1	EC:3.6.4.13	gsl03018	RNA degradation	Genetic Information Processing	Folding, sorting and degradation
TRINITY_DN14243_c1_g12	sind:105179865	45.6	6.1e-109	-	uridine kinase-like protein 5	K00876	uridine kinase	EC:2.7.1.48	sind00240	Pyrimidine metabolism	Metabolism	Nucleotide metabolism
TRINITY_DN14243_c1_g2	egu:105047604	59.2	6.2e-40	-	eukaryotic translation initiation factor 1A	K03236	translation initiation factor 1A	-	egu03013	RNA transport	Genetic Information Processing	Translation
TRINITY_DN14243_c1_g6	csl:COCSUDRAFT_46603	78	8.9e-193	-	26S proteasome subunit P45	K03061	26S proteasome regulatory subunit T1	-	csl03050	Proteasome	Genetic Information Processing	Folding, sorting and degradation
TRINITY_DN14245_c2_g2	bdi:100821880	39	7.1e-25	NA	NA	NA	NA	NA	NA	NA	NA	NA
TRINITY_DN14245_c3_g4	cvr:CHLNCDRAFT_57535	61.8	1.1e-150	-	hypothetical protein	K00819	ornithine--oxo-acid transaminase	EC:2.6.1.13	cvr00330	Arginine and proline metabolism	Metabolism	Amino acid metabolism
TRINITY_DN14246_c0_g2	csl:COCSUDRAFT_24291	73.9	4.6e-176	-	cytoplasmic DExD/H-box RNA helicase	K12614	ATP-dependent RNA helicase DDX6/DHH1	EC:3.6.4.13	csl03018	RNA degradation	Genetic Information Processing	Folding, sorting and degradation
TRINITY_DN14249_c2_g5	cvr:CHLNCDRAFT_36106	64.3	7.1e-08	-	hypothetical protein	K03015	DNA-directed RNA polymerase II subunit RPB7	-	cvr00230	Purine metabolism	Metabolism	Nucleotide metabolism
TRINITY_DN14249_c2_g5	cvr:CHLNCDRAFT_36106	64.3	7.1e-08	-	hypothetical protein	K03015	DNA-directed RNA polymerase II subunit RPB7	-	cvr00240	Pyrimidine metabolism	Metabolism	Nucleotide metabolism
TRINITY_DN14249_c2_g5	cvr:CHLNCDRAFT_36106	64.3	7.1e-08	-	hypothetical protein	K03015	DNA-directed RNA polymerase II subunit RPB7	-	cvr03020	RNA polymerase	Genetic Information Processing	Transcription
TRINITY_DN14249_c2_g9	nnu:104586825	54.2	2.8e-38	-	DNA-directed RNA polymerase II subunit RPB7	K03015	DNA-directed RNA polymerase II subunit RPB7	-	nnu00230	Purine metabolism	Metabolism	Nucleotide metabolism
TRINITY_DN14249_c2_g9	nnu:104586825	54.2	2.8e-38	-	DNA-directed RNA polymerase II subunit RPB7	K03015	DNA-directed RNA polymerase II subunit RPB7	-	nnu00240	Pyrimidine metabolism	Metabolism	Nucleotide metabolism
TRINITY_DN14249_c2_g9	nnu:104586825	54.2	2.8e-38	-	DNA-directed RNA polymerase II subunit RPB7	K03015	DNA-directed RNA polymerase II subunit RPB7	-	nnu03020	RNA polymerase	Genetic Information Processing	Transcription
TRINITY_DN14251_c0_g1	csl:COCSUDRAFT_18250	33.3	7.3e-52	NA	NA	NA	NA	NA	NA	NA	NA	NA
TRINITY_DN14251_c0_g4	mis:MICPUN_107831	50	4.8e-113	-	predicted protein	K00222	Delta14-sterol reductase	EC:1.3.1.70	mis00100	Steroid biosynthesis	Metabolism	Lipid metabolism
TRINITY_DN14253_c1_g1	atr:18447270	24.7	6.5e-27	NA	NA	NA	NA	NA	NA	NA	NA	NA
TRINITY_DN14254_c2_g1	gsl:Gasu_29090	41.4	3.4e-10	-	hypothetical protein	K14405	pre-mRNA 3'-end-processing factor FIP1	-	gsl03015	mRNA surveillance pathway	Genetic Information Processing	Translation
TRINITY_DN14254_c2_g4	cmo:107992092	42.9	7e-10	-	30S ribosomal protein S17-like	K02961	small subunit ribosomal protein S17	-	cmo03010	Ribosome	Genetic Information Processing	Translation
TRINITY_DN14264_c1_g1	jcu:105642726	41.9	5.5e-22	NA	NA	NA	NA	NA	NA	NA	NA	NA
TRINITY_DN14265_c0_g3	spen:107029732	53.7	3e-48	-	60S acidic ribosomal protein P0-like	K02941	large subunit ribosomal protein LP0	-	spen03010	Ribosome	Genetic Information Processing	Translation
TRINITY_DN14268_c1_g4	lang:109344923	38.3	1.8e-36	NA	NA	NA	NA	NA	NA	NA	NA	NA
TRINITY_DN14271_c3_g1	aip:107622984	58.8	5.9e-50	-	eukaryotic translation initiation factor NCBP	K03259	translation initiation factor 4E	-	aip03013	RNA transport	Genetic Information Processing	Translation
TRINITY_DN14273_c2_g1	ghi:107897889	59.7	3.4e-44	-	probable ribosome biogenesis protein RLP24	K02896	large subunit ribosomal protein L24e	-	ghi03010	Ribosome	Genetic Information Processing	Translation
TRINITY_DN14274_c1_g1	ota:OT_ostta13g01520	35.7	2e-41	NA	NA	NA	NA	NA	NA	NA	NA	NA
TRINITY_DN14274_c1_g2	bdi:104582887	87.1	5e-53	-	ADP-ribosylation factor 2	K07937	ADP-ribosylation factor 1	-	bdi04144	Endocytosis	Cellular Processes	Transport and catabolism
TRINITY_DN14274_c1_g3	bdi:100841651	49.7	3.8e-33	-	alpha-mannosidase isoform X1	K01191	alpha-mannosidase	EC:3.2.1.24	bdi00511	Other glycan degradation	Metabolism	Glycan biosynthesis and metabolism
TRINITY_DN14274_c1_g5	ccaj:109808604	34.2	9.9e-80	-	alpha-mannosidase-like	K01191	alpha-mannosidase	EC:3.2.1.24	ccaj00511	Other glycan degradation	Metabolism	Glycan biosynthesis and metabolism
TRINITY_DN14274_c1_g7	mtr:MTR_5g016540	67.9	9.1e-17	-	ADP-ribosylation factor-like protein A1D	K07937	ADP-ribosylation factor 1	-	mtr04144	Endocytosis	Cellular Processes	Transport and catabolism
TRINITY_DN14275_c0_g2	atr:18437611	51.7	1.7e-09	-	probable splicing factor 3A subunit 1	K12825	splicing factor 3A subunit 1	-	atr03040	Spliceosome	Genetic Information Processing	Transcription
TRINITY_DN14277_c4_g1	gsl:Gasu_13570	44.5	1.2e-67	NA	NA	NA	NA	NA	NA	NA	NA	NA
TRINITY_DN14278_c3_g10	vcn:VOLCADRAFT_81425	35.3	1.8e-39	NA	NA	NA	NA	NA	NA	NA	NA	NA
TRINITY_DN14278_c3_g2	gsl:Gasu_60520	68.5	8.3e-47	-	ubiquitin-conjugating enzyme E2	K06689	ubiquitin-conjugating enzyme E2 D	EC:2.3.2.23	gsl04141	Protein processing in endoplasmic reticulum	Genetic Information Processing	Folding, sorting and degradation
TRINITY_DN14278_c3_g2	gsl:Gasu_60520	68.5	8.3e-47	-	ubiquitin-conjugating enzyme E2	K06689	ubiquitin-conjugating enzyme E2 D	EC:2.3.2.23	gsl04120	Ubiquitin mediated proteolysis	Genetic Information Processing	Folding, sorting and degradation
TRINITY_DN14278_c3_g9	mus:103990486	53.8	2.8e-93	-	THO complex subunit 3	K12880	THO complex subunit 3	-	mus03040	Spliceosome	Genetic Information Processing	Transcription
TRINITY_DN14278_c3_g9	mus:103990486	53.8	2.8e-93	-	THO complex subunit 3	K12880	THO complex subunit 3	-	mus03013	RNA transport	Genetic Information Processing	Translation
TRINITY_DN14280_c0_g1	sbi:8080405	30.9	4.9e-09	NA	NA	NA	NA	NA	NA	NA	NA	NA
TRINITY_DN14280_c0_g5	mdm:103424731	35.5	8.5e-21	NA	NA	NA	NA	NA	NA	NA	NA	NA
TRINITY_DN14280_c0_g6	ccp:CHC_T00010007001	45.5	1.3e-74	-	ubiquitin-activating enzyme E1	K03178	ubiquitin-activating enzyme E1	EC:6.2.1.45	ccp04120	Ubiquitin mediated proteolysis	Genetic Information Processing	Folding, sorting and degradation
TRINITY_DN14281_c0_g3	cann:107838888	33.1	1.7e-23	NA	NA	NA	NA	NA	NA	NA	NA	NA
TRINITY_DN14281_c0_g4	atr:18428828	27	9.9e-54	-	CCR4-NOT transcription complex subunit 1 isoform X2	K12604	CCR4-NOT transcription complex subunit 1	-	atr03018	RNA degradation	Genetic Information Processing	Folding, sorting and degradation
TRINITY_DN14281_c0_g5	atr:18428828	34.7	2.9e-270	-	CCR4-NOT transcription complex subunit 1 isoform X2	K12604	CCR4-NOT transcription complex subunit 1	-	atr03018	RNA degradation	Genetic Information Processing	Folding, sorting and degradation
TRINITY_DN14281_c1_g4	mng:MNEG_11361	37.4	2e-56	NA	NA	NA	NA	NA	NA	NA	NA	NA
TRINITY_DN14283_c3_g1	gmx:100815231	42.9	2.2e-47	NA	NA	NA	NA	NA	NA	NA	NA	NA
TRINITY_DN14283_c4_g1	mdm:108173100	42.5	2.6e-20	NA	NA	NA	NA	NA	NA	NA	NA	NA
TRINITY_DN14285_c0_g1	aip:107605504	35.1	8.2e-25	NA	NA	NA	NA	NA	NA	NA	NA	NA
TRINITY_DN14286_c0_g2	pxb:103929399	46.9	1.4e-96	NA	NA	NA	NA	NA	NA	NA	NA	NA
TRINITY_DN14293_c0_g1	mis:MICPUN_71983	44	7.2e-21	-	predicted protein	K01082	3'(2'), 5'-bisphosphate nucleotidase	EC:3.1.3.7	mis00920	Sulfur metabolism	Metabolism	Energy metabolism
TRINITY_DN14294_c0_g1	smo:SELMODRAFT_179800	37.9	1.7e-87	NA	NA	NA	NA	NA	NA	NA	NA	NA
TRINITY_DN14295_c0_g4	ccp:CHC_T00009138001	50	4.3e-28	NA	NA	NA	NA	NA	NA	NA	NA	NA
TRINITY_DN14295_c0_g6	ats:109779787	45.5	1.8e-101	NA	NA	NA	NA	NA	NA	NA	NA	NA
TRINITY_DN14299_c2_g1	egu:105041044	37.2	3.9e-120	-	DNA mismatch repair protein MSH2 isoform X1	K08735	DNA mismatch repair protein MSH2	-	egu03430	Mismatch repair	Genetic Information Processing	Replication and repair
TRINITY_DN14300_c1_g1	spen:107002322	36.4	4.3e-30	-	serine/threonine-protein kinase CTR1-like	K14510	serine/threonine-protein kinase CTR1	EC:2.7.11.1	spen04016	MAPK signaling pathway - plant	Environmental Information Processing	Signal transduction
TRINITY_DN14300_c1_g1	spen:107002322	36.4	4.3e-30	-	serine/threonine-protein kinase CTR1-like	K14510	serine/threonine-protein kinase CTR1	EC:2.7.11.1	spen04075	Plant hormone signal transduction	Environmental Information Processing	Signal transduction
TRINITY_DN14301_c1_g1	ath:AT5G08415	63.8	1.2e-116	-	Radical SAM superfamily protein	K03644	lipoyl synthase	EC:2.8.1.8	ath00785	Lipoic acid metabolism	Metabolism	Metabolism of cofactors and vitamins
TRINITY_DN14302_c2_g2	cre:CHLREDRAFT_141763	58.7	7e-28	DAD1	predicted protein	K12668	oligosaccharyltransferase complex subunit epsilon	-	cre00510	N-Glycan biosynthesis	Metabolism	Glycan biosynthesis and metabolism
TRINITY_DN14302_c2_g2	cre:CHLREDRAFT_141763	58.7	7e-28	DAD1	predicted protein	K12668	oligosaccharyltransferase complex subunit epsilon	-	cre04141	Protein processing in endoplasmic reticulum	Genetic Information Processing	Folding, sorting and degradation
TRINITY_DN14306_c0_g1	vcn:VOLCADRAFT_56293	52.9	1.5e-11	-	hypothetical protein	K13024	inositol-hexakisphosphate/diphosphoinositol-pentakisphosphate 1-kinase	EC:2.7.4.24	vcn04070	Phosphatidylinositol signaling system	Environmental Information Processing	Signal transduction
TRINITY_DN14306_c0_g2	var:108345984	29.2	3.9e-45	-	inositol hexakisphosphate and diphosphoinositol-pentakisphosphate kinase 2-like	K13024	inositol-hexakisphosphate/diphosphoinositol-pentakisphosphate 1-kinase	EC:2.7.4.24	var04070	Phosphatidylinositol signaling system	Environmental Information Processing	Signal transduction
TRINITY_DN14306_c0_g5	smo:SELMODRAFT_444048	33.6	3.5e-47	-	hypothetical protein	K13024	inositol-hexakisphosphate/diphosphoinositol-pentakisphosphate 1-kinase	EC:2.7.4.24	smo04070	Phosphatidylinositol signaling system	Environmental Information Processing	Signal transduction
TRINITY_DN14310_c1_g2	apro:F751_6247	37	3e-22	NA	NA	NA	NA	NA	NA	NA	NA	NA
TRINITY_DN14310_c2_g1	smo:SELMODRAFT_230903	25.4	1.6e-13	NA	NA	NA	NA	NA	NA	NA	NA	NA
TRINITY_DN14319_c2_g1	ini:109182841	38.7	1.7e-62	NA	NA	NA	NA	NA	NA	NA	NA	NA
TRINITY_DN14319_c3_g6	gsl:Gasu_25030	51.9	6.9e-42	NA	NA	NA	NA	NA	NA	NA	NA	NA
TRINITY_DN14322_c0_g1	atr:18432832	42.5	3.1e-75	-	xanthine dehydrogenase/oxidase	K00106	xanthine dehydrogenase/oxidase	EC:1.17.1.4 1.17.3.2	atr00230	Purine metabolism	Metabolism	Nucleotide metabolism
TRINITY_DN14322_c0_g1	atr:18432832	42.5	3.1e-75	-	xanthine dehydrogenase/oxidase	K00106	xanthine dehydrogenase/oxidase	EC:1.17.1.4 1.17.3.2	atr00232	Caffeine metabolism	Metabolism	Biosynthesis of other secondary metabolites
TRINITY_DN14322_c0_g1	atr:18432832	42.5	3.1e-75	-	xanthine dehydrogenase/oxidase	K00106	xanthine dehydrogenase/oxidase	EC:1.17.1.4 1.17.3.2	atr04146	Peroxisome	Cellular Processes	Transport and catabolism
TRINITY_DN14322_c0_g2	nnu:104602208	42.4	2.6e-42	-	probable methionine--tRNA ligase	K01874	methionyl-tRNA synthetase	EC:6.1.1.10	nnu00450	Selenocompound metabolism	Metabolism	Metabolism of other amino acids
TRINITY_DN14322_c0_g2	nnu:104602208	42.4	2.6e-42	-	probable methionine--tRNA ligase	K01874	methionyl-tRNA synthetase	EC:6.1.1.10	nnu00970	Aminoacyl-tRNA biosynthesis	Genetic Information Processing	Translation
TRINITY_DN14325_c2_g1	ccaj:109814158	31.5	2.8e-18	-	pre-mRNA splicing factor SR-like 1 isoform X1	K12850	pre-mRNA-splicing factor 38B	-	ccaj03040	Spliceosome	Genetic Information Processing	Transcription
TRINITY_DN14325_c2_g2	gsl:Gasu_07620	68.9	1.5e-35	-	60S ribosomal protein L35	K02918	large subunit ribosomal protein L35e	-	gsl03010	Ribosome	Genetic Information Processing	Translation
TRINITY_DN14326_c0_g1	han:110937672	67.8	3.7e-29	-	phosphomannomutase-like	K17497	phosphomannomutase	EC:5.4.2.8	han00051	Fructose and mannose metabolism	Metabolism	Carbohydrate metabolism
TRINITY_DN14326_c0_g1	han:110937672	67.8	3.7e-29	-	phosphomannomutase-like	K17497	phosphomannomutase	EC:5.4.2.8	han00520	Amino sugar and nucleotide sugar metabolism	Metabolism	Carbohydrate metabolism
TRINITY_DN14328_c6_g1	atr:18439586	32.5	2.4e-27	-	dynamin-related protein 1C	K01528	dynamin GTPase	EC:3.6.5.5	atr04144	Endocytosis	Cellular Processes	Transport and catabolism
TRINITY_DN14328_c8_g1	lang:109347523	33.8	2.5e-32	-	serine/threonine-protein kinase CTR1-like	K14510	serine/threonine-protein kinase CTR1	EC:2.7.11.1	lang04016	MAPK signaling pathway - plant	Environmental Information Processing	Signal transduction
TRINITY_DN14328_c8_g1	lang:109347523	33.8	2.5e-32	-	serine/threonine-protein kinase CTR1-like	K14510	serine/threonine-protein kinase CTR1	EC:2.7.11.1	lang04075	Plant hormone signal transduction	Environmental Information Processing	Signal transduction
TRINITY_DN14330_c1_g3	cvr:CHLNCDRAFT_36776	59	2.2e-59	-	hypothetical protein	K02149	V-type H+-transporting ATPase subunit D	-	cvr00190	Oxidative phosphorylation	Metabolism	Energy metabolism
TRINITY_DN14330_c1_g3	cvr:CHLNCDRAFT_36776	59	2.2e-59	-	hypothetical protein	K02149	V-type H+-transporting ATPase subunit D	-	cvr04145	Phagosome	Cellular Processes	Transport and catabolism
TRINITY_DN14331_c3_g2	eus:EUTSA_v10004026mg	40.1	3e-65	NA	NA	NA	NA	NA	NA	NA	NA	NA
TRINITY_DN14332_c1_g6	lang:109349146	29.8	8.9e-30	NA	NA	NA	NA	NA	NA	NA	NA	NA
TRINITY_DN14333_c2_g4	mis:MICPUN_93773	39	4.7e-134	NA	NA	NA	NA	NA	NA	NA	NA	NA
TRINITY_DN14333_c2_g6	cme:CYME_CMN287C	44.8	2.7e-07	NA	NA	NA	NA	NA	NA	NA	NA	NA
TRINITY_DN14334_c1_g1	cvr:CHLNCDRAFT_8322	42.9	5.6e-50	NA	NA	NA	NA	NA	NA	NA	NA	NA
TRINITY_DN14340_c1_g1	mng:MNEG_0277	35.4	8.7e-22	-	hypothetical protein	K12948	signal peptidase complex subunit 3	EC:3.4.-.-	mng03060	Protein export	Genetic Information Processing	Folding, sorting and degradation
TRINITY_DN14340_c1_g2	smo:SELMODRAFT_438411	54.7	3.4e-74	NA	NA	NA	NA	NA	NA	NA	NA	NA
TRINITY_DN14341_c0_g2	nta:107793682	35.8	2.7e-36	NA	NA	NA	NA	NA	NA	NA	NA	NA
TRINITY_DN14344_c1_g4	ats:109775453	51.2	4.4e-85	LOC109775453	protein PELOTA 1	K06965	protein pelota	-	ats03015	mRNA surveillance pathway	Genetic Information Processing	Translation
TRINITY_DN14346_c0_g1	egu:105033224	32.9	3.1e-28	-	syntaxin-41-like	K08489	syntaxin 16	-	egu04130	SNARE interactions in vesicular transport	Genetic Information Processing	Folding, sorting and degradation
TRINITY_DN14349_c1_g1	thj:104826409	74.5	4.6e-15	-	protein BUD31 homolog 1	K12873	bud site selection protein 31	-	thj03040	Spliceosome	Genetic Information Processing	Transcription
TRINITY_DN14349_c2_g7	gmx:100794078	43.8	1.5e-49	-	probable 6-phosphogluconolactonase 4	K01057	6-phosphogluconolactonase	EC:3.1.1.31	gmx00030	Pentose phosphate pathway	Metabolism	Carbohydrate metabolism
TRINITY_DN14350_c2_g1	atr:18443797	30.9	2.5e-43	NA	NA	NA	NA	NA	NA	NA	NA	NA
TRINITY_DN14351_c1_g10	bpg:Bathy04g03750	25	1.8e-07	-	hypothetical protein	K13126	polyadenylate-binding protein	-	bpg03013	RNA transport	Genetic Information Processing	Translation
TRINITY_DN14351_c1_g10	bpg:Bathy04g03750	25	1.8e-07	-	hypothetical protein	K13126	polyadenylate-binding protein	-	bpg03015	mRNA surveillance pathway	Genetic Information Processing	Translation
TRINITY_DN14351_c1_g10	bpg:Bathy04g03750	25	1.8e-07	-	hypothetical protein	K13126	polyadenylate-binding protein	-	bpg03018	RNA degradation	Genetic Information Processing	Folding, sorting and degradation
TRINITY_DN14351_c1_g3	mus:104000957	39.8	2.8e-10	NA	NA	NA	NA	NA	NA	NA	NA	NA
TRINITY_DN14351_c1_g5	gra:105783848	47.5	3e-72	NA	NA	NA	NA	NA	NA	NA	NA	NA
TRINITY_DN14352_c0_g1	obr:102716444	37.6	4.2e-21	NA	NA	NA	NA	NA	NA	NA	NA	NA
TRINITY_DN14353_c1_g1	csl:COCSUDRAFT_23313	47.5	1.5e-98	-	alanine-glyoxylate transaminase	K00830	alanine-glyoxylate transaminase / serine-glyoxylate transaminase / serine-pyruvate transaminase	EC:2.6.1.44 2.6.1.45 2.6.1.51	csl00630	Glyoxylate and dicarboxylate metabolism	Metabolism	Carbohydrate metabolism
TRINITY_DN14353_c1_g1	csl:COCSUDRAFT_23313	47.5	1.5e-98	-	alanine-glyoxylate transaminase	K00830	alanine-glyoxylate transaminase / serine-glyoxylate transaminase / serine-pyruvate transaminase	EC:2.6.1.44 2.6.1.45 2.6.1.51	csl00250	Alanine, aspartate and glutamate metabolism	Metabolism	Amino acid metabolism
TRINITY_DN14353_c1_g1	csl:COCSUDRAFT_23313	47.5	1.5e-98	-	alanine-glyoxylate transaminase	K00830	alanine-glyoxylate transaminase / serine-glyoxylate transaminase / serine-pyruvate transaminase	EC:2.6.1.44 2.6.1.45 2.6.1.51	csl00260	Glycine, serine and threonine metabolism	Metabolism	Amino acid metabolism
TRINITY_DN14353_c1_g1	csl:COCSUDRAFT_23313	47.5	1.5e-98	-	alanine-glyoxylate transaminase	K00830	alanine-glyoxylate transaminase / serine-glyoxylate transaminase / serine-pyruvate transaminase	EC:2.6.1.44 2.6.1.45 2.6.1.51	csl04146	Peroxisome	Cellular Processes	Transport and catabolism
TRINITY_DN14355_c1_g1	gmx:100789734	40.3	2.3e-46	-	mitogen-activated protein kinase kinase 2	K20603	mitogen-activated protein kinase kinase 2	EC:2.7.12.2	gmx04016	MAPK signaling pathway - plant	Environmental Information Processing	Signal transduction
TRINITY_DN14357_c0_g1	cme:CYME_CMH107C	43.6	3e-42	-	ubiquinone biosynthesis protein COQ7	K06134	3-demethoxyubiquinol 3-hydroxylase	EC:1.14.99.60	cme00130	Ubiquinone and other terpenoid-quinone biosynthesis	Metabolism	Metabolism of cofactors and vitamins
TRINITY_DN14357_c2_g1	cvr:CHLNCDRAFT_35098	59.2	5.9e-29	-	hypothetical protein	K01052	lysosomal acid lipase/cholesteryl ester hydrolase	EC:3.1.1.13	cvr00100	Steroid biosynthesis	Metabolism	Lipid metabolism
TRINITY_DN14358_c1_g3	dct:110111236	27.5	2.4e-37	NA	NA	NA	NA	NA	NA	NA	NA	NA
TRINITY_DN14358_c1_g7	smo:SELMODRAFT_442906	28.1	7.2e-30	NA	NA	NA	NA	NA	NA	NA	NA	NA
TRINITY_DN14361_c3_g2	ghi:107927943	41.3	1.6e-69	NA	NA	NA	NA	NA	NA	NA	NA	NA
TRINITY_DN14364_c0_g2	gsl:Gasu_02440	42.3	1e-14	-	DNA-directed RNA polymerase II subunit D	K03012	DNA-directed RNA polymerase II subunit RPB4	-	gsl00230	Purine metabolism	Metabolism	Nucleotide metabolism
TRINITY_DN14364_c0_g2	gsl:Gasu_02440	42.3	1e-14	-	DNA-directed RNA polymerase II subunit D	K03012	DNA-directed RNA polymerase II subunit RPB4	-	gsl00240	Pyrimidine metabolism	Metabolism	Nucleotide metabolism
TRINITY_DN14364_c0_g2	gsl:Gasu_02440	42.3	1e-14	-	DNA-directed RNA polymerase II subunit D	K03012	DNA-directed RNA polymerase II subunit RPB4	-	gsl03020	RNA polymerase	Genetic Information Processing	Transcription
TRINITY_DN14364_c0_g5	nnu:104604572	47.4	6.4e-81	-	WD repeat-containing protein 3	K14556	U3 small nucleolar RNA-associated protein 12	-	nnu03008	Ribosome biogenesis in eukaryotes	Genetic Information Processing	Translation
TRINITY_DN14364_c1_g1	smo:SELMODRAFT_269263	38.4	2.6e-33	NA	NA	NA	NA	NA	NA	NA	NA	NA
TRINITY_DN14367_c1_g2	obr:102709407	31.4	4.3e-13	NA	NA	NA	NA	NA	NA	NA	NA	NA
TRINITY_DN14369_c0_g1	ghi:107931677	50.5	4e-120	NA	NA	NA	NA	NA	NA	NA	NA	NA
TRINITY_DN14373_c1_g2	csl:COCSUDRAFT_24580	57.4	5.6e-62	-	N-terminal nucleophile aminohydrolase	K02735	20S proteasome subunit beta 3	EC:3.4.25.1	csl03050	Proteasome	Genetic Information Processing	Folding, sorting and degradation
TRINITY_DN14379_c2_g1	cmo:103496845	45.1	7.6e-32	-	pyridoxal kinase	K00868	pyridoxine kinase	EC:2.7.1.35	cmo00750	Vitamin B6 metabolism	Metabolism	Metabolism of cofactors and vitamins
TRINITY_DN14385_c1_g2	cvr:CHLNCDRAFT_137564	38.3	5e-27	-	hypothetical protein	K10703	very-long-chain (3R)-3-hydroxyacyl-CoA dehydratase	EC:4.2.1.134	cvr00062	Fatty acid elongation	Metabolism	Lipid metabolism
TRINITY_DN14385_c1_g2	cvr:CHLNCDRAFT_137564	38.3	5e-27	-	hypothetical protein	K10703	very-long-chain (3R)-3-hydroxyacyl-CoA dehydratase	EC:4.2.1.134	cvr01040	Biosynthesis of unsaturated fatty acids	Metabolism	Lipid metabolism
TRINITY_DN14385_c2_g3	han:110936844	31.1	1.9e-09	NA	NA	NA	NA	NA	NA	NA	NA	NA
TRINITY_DN14385_c2_g4	egu:105054969	54.9	3e-23	-	protein CWC15 homolog	K12863	protein CWC15	-	egu03040	Spliceosome	Genetic Information Processing	Transcription
TRINITY_DN14385_c2_g5	cam:101497052	46.9	6.9e-16	-	ras-related protein RABE1a-like	K07901	Ras-related protein Rab-8A	-	cam04144	Endocytosis	Cellular Processes	Transport and catabolism
TRINITY_DN14387_c0_g1	adu:107479756	57.3	4.3e-23	-	30S ribosomal protein S16-2	K02959	small subunit ribosomal protein S16	-	adu03010	Ribosome	Genetic Information Processing	Translation
TRINITY_DN14388_c2_g4	jcu:105629910	38.8	2.6e-26	NA	NA	NA	NA	NA	NA	NA	NA	NA
TRINITY_DN14392_c0_g2	csat:104723353	28.4	2.2e-16	-	palmitoyl-protein thioesterase 1-like isoform X1	K01074	palmitoyl-protein thioesterase	EC:3.1.2.22	csat00062	Fatty acid elongation	Metabolism	Lipid metabolism
TRINITY_DN14394_c0_g4	ath:AT2G31955	57.2	2.6e-95	CNX2	cofactor of nitrate reductase and xanthine dehydrogenase 2	K03639	GTP 3',8-cyclase	EC:4.1.99.22	ath00790	Folate biosynthesis	Metabolism	Metabolism of cofactors and vitamins
TRINITY_DN14394_c0_g4	ath:AT2G31955	57.2	2.6e-95	CNX2	cofactor of nitrate reductase and xanthine dehydrogenase 2	K03639	GTP 3',8-cyclase	EC:4.1.99.22	ath04122	Sulfur relay system	Genetic Information Processing	Folding, sorting and degradation
TRINITY_DN14394_c0_g7	osa:4352298	59.7	9.8e-17	-	cyclic pyranopterin monophosphate synthase	K03639	GTP 3',8-cyclase	EC:4.1.99.22	osa00790	Folate biosynthesis	Metabolism	Metabolism of cofactors and vitamins
TRINITY_DN14394_c0_g7	osa:4352298	59.7	9.8e-17	-	cyclic pyranopterin monophosphate synthase	K03639	GTP 3',8-cyclase	EC:4.1.99.22	osa04122	Sulfur relay system	Genetic Information Processing	Folding, sorting and degradation
TRINITY_DN14396_c0_g2	csl:COCSUDRAFT_48914	43.2	8e-94	NA	NA	NA	NA	NA	NA	NA	NA	NA
TRINITY_DN14397_c0_g1	mis:MICPUN_84881	41.1	4.7e-11	NA	NA	NA	NA	NA	NA	NA	NA	NA
TRINITY_DN14397_c2_g2	cme:CYME_CMM237C	38.6	3.2e-74	-	actin	K05692	actin beta/gamma 1	-	cme04145	Phagosome	Cellular Processes	Transport and catabolism
TRINITY_DN14397_c2_g4	mus:103987114	46.6	1.5e-99	-	sphingosine-1-phosphate lyase	K01634	sphinganine-1-phosphate aldolase	EC:4.1.2.27	mus00600	Sphingolipid metabolism	Metabolism	Lipid metabolism
TRINITY_DN14397_c2_g9	nta:107821860	34.8	2.9e-35	NA	NA	NA	NA	NA	NA	NA	NA	NA
TRINITY_DN14402_c1_g2	cann:107863516	51.9	2.5e-103	NA	NA	NA	NA	NA	NA	NA	NA	NA
TRINITY_DN14402_c2_g2	ini:109186939	47.5	1.6e-127	NA	NA	NA	NA	NA	NA	NA	NA	NA
TRINITY_DN14405_c2_g4	nnu:104609936	35.3	6.2e-62	NA	NA	NA	NA	NA	NA	NA	NA	NA
TRINITY_DN14407_c0_g1	mis:MICPUN_60002	46.8	9.4e-99	AGT2.2	alanine-glyoxylate aminotransferase	K13524	4-aminobutyrate aminotransferase / (S)-3-amino-2-methylpropionate transaminase	EC:2.6.1.19 2.6.1.22	mis00640	Propanoate metabolism	Metabolism	Carbohydrate metabolism
TRINITY_DN14407_c0_g1	mis:MICPUN_60002	46.8	9.4e-99	AGT2.2	alanine-glyoxylate aminotransferase	K13524	4-aminobutyrate aminotransferase / (S)-3-amino-2-methylpropionate transaminase	EC:2.6.1.19 2.6.1.22	mis00650	Butanoate metabolism	Metabolism	Carbohydrate metabolism
TRINITY_DN14407_c0_g1	mis:MICPUN_60002	46.8	9.4e-99	AGT2.2	alanine-glyoxylate aminotransferase	K13524	4-aminobutyrate aminotransferase / (S)-3-amino-2-methylpropionate transaminase	EC:2.6.1.19 2.6.1.22	mis00250	Alanine, aspartate and glutamate metabolism	Metabolism	Amino acid metabolism
TRINITY_DN14407_c0_g1	mis:MICPUN_60002	46.8	9.4e-99	AGT2.2	alanine-glyoxylate aminotransferase	K13524	4-aminobutyrate aminotransferase / (S)-3-amino-2-methylpropionate transaminase	EC:2.6.1.19 2.6.1.22	mis00280	Valine, leucine and isoleucine degradation	Metabolism	Amino acid metabolism
TRINITY_DN14407_c0_g1	mis:MICPUN_60002	46.8	9.4e-99	AGT2.2	alanine-glyoxylate aminotransferase	K13524	4-aminobutyrate aminotransferase / (S)-3-amino-2-methylpropionate transaminase	EC:2.6.1.19 2.6.1.22	mis00410	beta-Alanine metabolism	Metabolism	Metabolism of other amino acids
TRINITY_DN14407_c0_g2	nnu:104600472	35.4	1.9e-41	NA	NA	NA	NA	NA	NA	NA	NA	NA
TRINITY_DN14408_c0_g1	osa:4348891	37.5	1.9e-15	-	vacuolar protein sorting-associated protein 2 homolog 3	K12192	charged multivesicular body protein 2B	-	osa04144	Endocytosis	Cellular Processes	Transport and catabolism
TRINITY_DN14408_c0_g4	jcu:105638344	47.1	2.8e-43	-	ubiquinone biosynthesis O-methyltransferase	K00591	polyprenyldihydroxybenzoate methyltransferase / 3-demethylubiquinol 3-O-methyltransferase	EC:2.1.1.114 2.1.1.64	jcu00130	Ubiquinone and other terpenoid-quinone biosynthesis	Metabolism	Metabolism of cofactors and vitamins
TRINITY_DN14411_c1_g1	osa:4324379	77.7	2.4e-124	-	26S proteasome non-ATPase regulatory subunit 14 homolog	K03030	26S proteasome regulatory subunit N11	-	osa03050	Proteasome	Genetic Information Processing	Folding, sorting and degradation
TRINITY_DN14412_c1_g1	pxb:103952381	49	1.3e-18	-	DNA-damage-repair/toleration protein DRT111	K12840	splicing factor 45	-	pxb03040	Spliceosome	Genetic Information Processing	Transcription
TRINITY_DN14412_c1_g3	cvr:CHLNCDRAFT_30901	32.8	4.8e-57	-	hypothetical protein	K01176	alpha-amylase	EC:3.2.1.1	cvr00500	Starch and sucrose metabolism	Metabolism	Carbohydrate metabolism
TRINITY_DN14412_c1_g4	mus:104000653	41.9	2.2e-11	NA	NA	NA	NA	NA	NA	NA	NA	NA
TRINITY_DN14413_c0_g2	smo:SELMODRAFT_23730	31.4	1.1e-14	NA	NA	NA	NA	NA	NA	NA	NA	NA
TRINITY_DN14419_c1_g1	mis:MICPUN_58760	36.2	5.2e-08	NA	NA	NA	NA	NA	NA	NA	NA	NA
TRINITY_DN14419_c1_g6	smo:SELMODRAFT_119546	35.6	1.1e-09	NA	NA	NA	NA	NA	NA	NA	NA	NA
TRINITY_DN14419_c2_g1	mis:MICPUN_60675	31.1	3.5e-32	NA	NA	NA	NA	NA	NA	NA	NA	NA
TRINITY_DN14420_c1_g7	ccp:CHC_T00007173001	42.6	1.7e-110	-	hypothetical protein	K03033	26S proteasome regulatory subunit N3	-	ccp03050	Proteasome	Genetic Information Processing	Folding, sorting and degradation
TRINITY_DN14427_c0_g2	csl:COCSUDRAFT_53188	54.6	1.3e-151	-	aspartyl-tRNA synthetase	K22503	aspartyl-tRNA synthetase	EC:6.1.1.12	csl00970	Aminoacyl-tRNA biosynthesis	Genetic Information Processing	Translation
TRINITY_DN14427_c0_g4	smo:SELMODRAFT_100906	32.7	1.7e-54	NA	NA	NA	NA	NA	NA	NA	NA	NA
TRINITY_DN14427_c0_g5	zju:107423036	32.4	3.5e-45	NA	NA	NA	NA	NA	NA	NA	NA	NA
TRINITY_DN14429_c2_g1	mtr:MTR_4g030930	44.2	3.2e-84	-	molybdenum cofactor sulfurase	K15631	molybdenum cofactor sulfurtransferase	EC:2.8.1.9	mtr00790	Folate biosynthesis	Metabolism	Metabolism of cofactors and vitamins
TRINITY_DN14429_c2_g6	fve:101314664	43.8	9.1e-22	NA	NA	NA	NA	NA	NA	NA	NA	NA
TRINITY_DN14430_c2_g6	vvi:100255768	52.2	1.4e-20	NA	NA	NA	NA	NA	NA	NA	NA	NA
TRINITY_DN14433_c2_g12	cann:107870876	36.5	3.7e-90	-	probable splicing factor 3A subunit 1	K12825	splicing factor 3A subunit 1	-	cann03040	Spliceosome	Genetic Information Processing	Transcription
TRINITY_DN14437_c0_g1	tcc:18586488	46.1	4e-06	NA	NA	NA	NA	NA	NA	NA	NA	NA
TRINITY_DN14442_c0_g1	cam:101502827	25.9	5.2e-11	NA	NA	NA	NA	NA	NA	NA	NA	NA
TRINITY_DN14444_c3_g4	ccp:CHC_T00006269001	40	1.9e-76	-	hypothetical protein	K00486	kynurenine 3-monooxygenase	EC:1.14.13.9	ccp00380	Tryptophan metabolism	Metabolism	Amino acid metabolism
TRINITY_DN14446_c1_g10	eus:EUTSA_v10017564mg	30.7	2.6e-21	NA	NA	NA	NA	NA	NA	NA	NA	NA
TRINITY_DN14446_c1_g6	mtr:MTR_1g105460	31.5	2.3e-21	NA	NA	NA	NA	NA	NA	NA	NA	NA
TRINITY_DN14449_c0_g10	pda:103708800	79.8	7.7e-141	-	26S protease regulatory subunit 8 homolog A-like	K03066	26S proteasome regulatory subunit T6	-	pda03050	Proteasome	Genetic Information Processing	Folding, sorting and degradation
TRINITY_DN14449_c0_g6	bna:106358541	46.5	8.4e-42	-	vacuolar protein sorting-associated protein 60.2	K12198	charged multivesicular body protein 5	-	bna04144	Endocytosis	Cellular Processes	Transport and catabolism
TRINITY_DN14450_c0_g1	mpp:MICPUCDRAFT_17581	33.9	2.9e-28	NA	NA	NA	NA	NA	NA	NA	NA	NA
TRINITY_DN14451_c1_g2	csl:COCSUDRAFT_53991	42.6	1.1e-73	NA	NA	NA	NA	NA	NA	NA	NA	NA
TRINITY_DN14451_c1_g7	obr:102718510	61.8	1.2e-80	NA	NA	NA	NA	NA	NA	NA	NA	NA
TRINITY_DN14453_c0_g1	csv:101222495	27.9	3.1e-72	-	respiratory burst oxidase homolog protein A-like	K13447	respiratory burst oxidase	EC:1.6.3.- 1.11.1.-	csv04016	MAPK signaling pathway - plant	Environmental Information Processing	Signal transduction
TRINITY_DN14453_c0_g1	csv:101222495	27.9	3.1e-72	-	respiratory burst oxidase homolog protein A-like	K13447	respiratory burst oxidase	EC:1.6.3.- 1.11.1.-	csv04626	Plant-pathogen interaction	Organismal Systems	Environmental adaptation
TRINITY_DN14455_c0_g1	dct:110095483	30.3	1e-31	-	dolichol kinase EVAN	K00902	dolichol kinase	EC:2.7.1.108	dct00510	N-Glycan biosynthesis	Metabolism	Glycan biosynthesis and metabolism
TRINITY_DN14455_c0_g2	ccp:CHC_T00008899001	45.3	4.8e-11	-	Nitrate reductase	K10534	nitrate reductase (NAD(P)H)	EC:1.7.1.1 1.7.1.2 1.7.1.3	ccp00910	Nitrogen metabolism	Metabolism	Energy metabolism
TRINITY_DN14455_c0_g5	mpp:MICPUCDRAFT_23376	62.1	2.7e-28	NA	NA	NA	NA	NA	NA	NA	NA	NA
TRINITY_DN14456_c1_g1	mdm:103445363	44.9	1.9e-25	NA	NA	NA	NA	NA	NA	NA	NA	NA
TRINITY_DN14460_c0_g3	cam:101495256	47.9	1.4e-44	NA	NA	NA	NA	NA	NA	NA	NA	NA
TRINITY_DN14461_c0_g8	mis:MICPUN_113602	59.2	4.6e-116	NA	NA	NA	NA	NA	NA	NA	NA	NA
TRINITY_DN14464_c0_g1	ini:109183439	36.9	5.1e-58	-	splicing factor SF3a60 homolog	K12827	splicing factor 3A subunit 3	-	ini03040	Spliceosome	Genetic Information Processing	Transcription
TRINITY_DN14464_c1_g7	bna:106397661	54.4	5.1e-184	-	LOW QUALITY PROTEIN: eukaryotic translation initiation factor 5B-like	K03243	translation initiation factor 5B	-	bna03013	RNA transport	Genetic Information Processing	Translation
TRINITY_DN14465_c0_g1	mdm:103428590	34.5	1.2e-40	-	prostaglandin E synthase 2-like	K05309	microsomal prostaglandin-E synthase 2	EC:5.3.99.3	mdm00590	Arachidonic acid metabolism	Metabolism	Lipid metabolism
TRINITY_DN14465_c0_g6	sita:101759078	43.4	2.1e-112	-	sphingosine-1-phosphate lyase	K01634	sphinganine-1-phosphate aldolase	EC:4.1.2.27	sita00600	Sphingolipid metabolism	Metabolism	Lipid metabolism
TRINITY_DN14467_c3_g2	osa:4333571	67.2	0	-	DNA-directed RNA polymerase II subunit RPB2	K03010	DNA-directed RNA polymerase II subunit RPB2	EC:2.7.7.6	osa00230	Purine metabolism	Metabolism	Nucleotide metabolism
TRINITY_DN14467_c3_g2	osa:4333571	67.2	0	-	DNA-directed RNA polymerase II subunit RPB2	K03010	DNA-directed RNA polymerase II subunit RPB2	EC:2.7.7.6	osa00240	Pyrimidine metabolism	Metabolism	Nucleotide metabolism
TRINITY_DN14467_c3_g2	osa:4333571	67.2	0	-	DNA-directed RNA polymerase II subunit RPB2	K03010	DNA-directed RNA polymerase II subunit RPB2	EC:2.7.7.6	osa03020	RNA polymerase	Genetic Information Processing	Transcription
TRINITY_DN14468_c0_g1	dct:110114970	46.6	3e-24	NA	NA	NA	NA	NA	NA	NA	NA	NA
TRINITY_DN14469_c4_g1	bvg:104904371	50.7	8.6e-143	-	2-oxoglutarate dehydrogenase	K00164	2-oxoglutarate dehydrogenase E1 component	EC:1.2.4.2	bvg00020	Citrate cycle (TCA cycle)	Metabolism	Carbohydrate metabolism
TRINITY_DN14469_c4_g1	bvg:104904371	50.7	8.6e-143	-	2-oxoglutarate dehydrogenase	K00164	2-oxoglutarate dehydrogenase E1 component	EC:1.2.4.2	bvg00310	Lysine degradation	Metabolism	Amino acid metabolism
TRINITY_DN14469_c4_g1	bvg:104904371	50.7	8.6e-143	-	2-oxoglutarate dehydrogenase	K00164	2-oxoglutarate dehydrogenase E1 component	EC:1.2.4.2	bvg00380	Tryptophan metabolism	Metabolism	Amino acid metabolism
TRINITY_DN14469_c4_g2	sbi:110432899	41.3	3.8e-52	NA	NA	NA	NA	NA	NA	NA	NA	NA
TRINITY_DN1446_c0_g1	cit:102614735	33.1	2.3e-12	NA	NA	NA	NA	NA	NA	NA	NA	NA
TRINITY_DN14471_c1_g2	ath:AT5G06680	36.1	7.5e-126	NA	NA	NA	NA	NA	NA	NA	NA	NA
TRINITY_DN14481_c1_g1	smo:SELMODRAFT_439526	36.6	5.6e-30	NA	NA	NA	NA	NA	NA	NA	NA	NA
TRINITY_DN14481_c1_g2	vcn:VOLCADRAFT_108270	36.9	2.3e-31	NA	NA	NA	NA	NA	NA	NA	NA	NA
TRINITY_DN14485_c0_g1	gra:105800749	49.6	1.3e-93	NA	NA	NA	NA	NA	NA	NA	NA	NA
TRINITY_DN14485_c1_g1	bdi:100846442	40.9	1.5e-34	-	U4/U6 small nuclear ribonucleoprotein PRP4-like protein	K12662	U4/U6 small nuclear ribonucleoprotein PRP4	-	bdi03040	Spliceosome	Genetic Information Processing	Transcription
TRINITY_DN14487_c2_g1	smo:SELMODRAFT_235430	24.4	1e-55	NA	NA	NA	NA	NA	NA	NA	NA	NA
TRINITY_DN14489_c1_g2	dct:110114094	62.8	6.5e-48	-	40S ribosomal protein S19-1-like	K02966	small subunit ribosomal protein S19e	-	dct03010	Ribosome	Genetic Information Processing	Translation
TRINITY_DN14490_c0_g1	bpg:Bathy07g03530	35.4	2.7e-14	-	hypothetical protein	K14510	serine/threonine-protein kinase CTR1	EC:2.7.11.1	bpg04016	MAPK signaling pathway - plant	Environmental Information Processing	Signal transduction
TRINITY_DN14490_c0_g1	bpg:Bathy07g03530	35.4	2.7e-14	-	hypothetical protein	K14510	serine/threonine-protein kinase CTR1	EC:2.7.11.1	bpg04075	Plant hormone signal transduction	Environmental Information Processing	Signal transduction
TRINITY_DN14490_c0_g6	cre:CHLREDRAFT_205587	32.4	1.8e-13	NA	NA	NA	NA	NA	NA	NA	NA	NA
TRINITY_DN14494_c2_g2	sita:101776881	30.7	1e-28	-	3beta-hydroxysteroid- dehydrogenase/decarboxylase	K07748	sterol-4alpha-carboxylate 3-dehydrogenase (decarboxylating)	EC:1.1.1.170	sita00100	Steroid biosynthesis	Metabolism	Lipid metabolism
TRINITY_DN14494_c2_g3	sita:101759142	94.4	5.8e-66	NA	NA	NA	NA	NA	NA	NA	NA	NA
TRINITY_DN14494_c2_g7	csat:104777665	33.1	1.5e-28	-	3beta-hydroxysteroid-dehydrogenase/decarboxylase isoform X1	K07748	sterol-4alpha-carboxylate 3-dehydrogenase (decarboxylating)	EC:1.1.1.170	csat00100	Steroid biosynthesis	Metabolism	Lipid metabolism
TRINITY_DN14494_c3_g3	csl:COCSUDRAFT_7993	52.7	3.2e-44	-	ribosomal protein L15	K02876	large subunit ribosomal protein L15	-	csl03010	Ribosome	Genetic Information Processing	Translation
TRINITY_DN14496_c0_g1	mis:MICPUN_61543	48	7.4e-33	-	predicted protein	K13758	retinal rod rhodopsin-sensitive cGMP 3',5'-cyclic phosphodiesterase subunit delta	-	mis00230	Purine metabolism	Metabolism	Nucleotide metabolism
TRINITY_DN14496_c0_g2	cre:CHLREDRAFT_158244	44.6	4.3e-68	LCI28	low CO2-induced aldose reductase	K00002	alcohol dehydrogenase (NADP+)	EC:1.1.1.2	cre00010	Glycolysis / Gluconeogenesis	Metabolism	Carbohydrate metabolism
TRINITY_DN14496_c0_g2	cre:CHLREDRAFT_158244	44.6	4.3e-68	LCI28	low CO2-induced aldose reductase	K00002	alcohol dehydrogenase (NADP+)	EC:1.1.1.2	cre00040	Pentose and glucuronate interconversions	Metabolism	Carbohydrate metabolism
TRINITY_DN14496_c0_g2	cre:CHLREDRAFT_158244	44.6	4.3e-68	LCI28	low CO2-induced aldose reductase	K00002	alcohol dehydrogenase (NADP+)	EC:1.1.1.2	cre00561	Glycerolipid metabolism	Metabolism	Lipid metabolism
TRINITY_DN14496_c0_g3	bvg:104890984	29.2	2.8e-43	-	protein disulfide-isomerase	K09580	protein disulfide-isomerase A1	EC:5.3.4.1	bvg04141	Protein processing in endoplasmic reticulum	Genetic Information Processing	Folding, sorting and degradation
TRINITY_DN14497_c0_g1	gsl:Gasu_19580	55	1.7e-22	NA	NA	NA	NA	NA	NA	NA	NA	NA
TRINITY_DN14497_c1_g2	mus:103978705	32.9	6.7e-16	-	IST1-like protein isoform X2	K19476	vacuolar protein sorting-associated protein IST1	-	mus04144	Endocytosis	Cellular Processes	Transport and catabolism
TRINITY_DN14497_c2_g3	smo:SELMODRAFT_87617	38.6	3.8e-78	-	hypothetical protein	K01578	malonyl-CoA decarboxylase	EC:4.1.1.9	smo00640	Propanoate metabolism	Metabolism	Carbohydrate metabolism
TRINITY_DN14497_c2_g3	smo:SELMODRAFT_87617	38.6	3.8e-78	-	hypothetical protein	K01578	malonyl-CoA decarboxylase	EC:4.1.1.9	smo00410	beta-Alanine metabolism	Metabolism	Metabolism of other amino acids
TRINITY_DN14497_c2_g3	smo:SELMODRAFT_87617	38.6	3.8e-78	-	hypothetical protein	K01578	malonyl-CoA decarboxylase	EC:4.1.1.9	smo04146	Peroxisome	Cellular Processes	Transport and catabolism
TRINITY_DN14497_c2_g9	vra:106760803	42.3	3e-17	NA	NA	NA	NA	NA	NA	NA	NA	NA
TRINITY_DN14500_c0_g1	lang:109344923	50	6.3e-19	NA	NA	NA	NA	NA	NA	NA	NA	NA
TRINITY_DN14501_c0_g3	mpp:MICPUCDRAFT_57104	33	3.6e-21	-	hypothetical protein	K08493	vesicle transport through interaction with t-SNAREs 1	-	mpp04130	SNARE interactions in vesicular transport	Genetic Information Processing	Folding, sorting and degradation
TRINITY_DN14505_c3_g1	fve:101297777	29.7	9.9e-11	NA	NA	NA	NA	NA	NA	NA	NA	NA
TRINITY_DN14508_c0_g6	cmo:103486998	29.2	9.7e-34	NA	NA	NA	NA	NA	NA	NA	NA	NA
TRINITY_DN14509_c5_g1	osa:4343971	50.2	4.3e-81	NA	NA	NA	NA	NA	NA	NA	NA	NA
TRINITY_DN14510_c0_g1	mng:MNEG_2452	34.9	3e-16	NA	NA	NA	NA	NA	NA	NA	NA	NA
TRINITY_DN14512_c0_g1	pvu:PHAVU_011G170000g	37.6	1.1e-31	NA	NA	NA	NA	NA	NA	NA	NA	NA
TRINITY_DN14512_c0_g2	boe:106304266	29.3	6.9e-12	-	polyadenylate-binding protein 2	K13126	polyadenylate-binding protein	-	boe03013	RNA transport	Genetic Information Processing	Translation
TRINITY_DN14512_c0_g2	boe:106304266	29.3	6.9e-12	-	polyadenylate-binding protein 2	K13126	polyadenylate-binding protein	-	boe03015	mRNA surveillance pathway	Genetic Information Processing	Translation
TRINITY_DN14512_c0_g2	boe:106304266	29.3	6.9e-12	-	polyadenylate-binding protein 2	K13126	polyadenylate-binding protein	-	boe03018	RNA degradation	Genetic Information Processing	Folding, sorting and degradation
TRINITY_DN14514_c0_g1	han:110891513	48.4	8.8e-152	-	DEAD-box ATP-dependent RNA helicase 56-like isoform X1	K12812	ATP-dependent RNA helicase UAP56/SUB2	EC:3.6.4.13	han03040	Spliceosome	Genetic Information Processing	Transcription
TRINITY_DN14514_c0_g1	han:110891513	48.4	8.8e-152	-	DEAD-box ATP-dependent RNA helicase 56-like isoform X1	K12812	ATP-dependent RNA helicase UAP56/SUB2	EC:3.6.4.13	han03013	RNA transport	Genetic Information Processing	Translation
TRINITY_DN14514_c0_g1	han:110891513	48.4	8.8e-152	-	DEAD-box ATP-dependent RNA helicase 56-like isoform X1	K12812	ATP-dependent RNA helicase UAP56/SUB2	EC:3.6.4.13	han03015	mRNA surveillance pathway	Genetic Information Processing	Translation
TRINITY_DN14516_c0_g2	olu:OSTLU_48985	42.4	1.3e-22	NA	NA	NA	NA	NA	NA	NA	NA	NA
TRINITY_DN14516_c0_g3	mtr:MTR_4g021350	41.4	1.5e-22	-	aldo/keto reductase family oxidoreductase	K00002	alcohol dehydrogenase (NADP+)	EC:1.1.1.2	mtr00010	Glycolysis / Gluconeogenesis	Metabolism	Carbohydrate metabolism
TRINITY_DN14516_c0_g3	mtr:MTR_4g021350	41.4	1.5e-22	-	aldo/keto reductase family oxidoreductase	K00002	alcohol dehydrogenase (NADP+)	EC:1.1.1.2	mtr00040	Pentose and glucuronate interconversions	Metabolism	Carbohydrate metabolism
TRINITY_DN14516_c0_g3	mtr:MTR_4g021350	41.4	1.5e-22	-	aldo/keto reductase family oxidoreductase	K00002	alcohol dehydrogenase (NADP+)	EC:1.1.1.2	mtr00561	Glycerolipid metabolism	Metabolism	Lipid metabolism
TRINITY_DN14517_c0_g4	ats:109771387	26.7	2.4e-31	NA	NA	NA	NA	NA	NA	NA	NA	NA
TRINITY_DN14517_c0_g6	csl:COCSUDRAFT_45999	43.4	6.7e-19	NA	NA	NA	NA	NA	NA	NA	NA	NA
TRINITY_DN14519_c0_g5	ccp:CHC_T00001610001	34.9	1.1e-119	NA	NA	NA	NA	NA	NA	NA	NA	NA
TRINITY_DN14523_c0_g1	ini:109156479	24.9	8.3e-28	NA	NA	NA	NA	NA	NA	NA	NA	NA
TRINITY_DN14524_c1_g3	sot:102591862	44.9	1.5e-22	-	probable ADP-ribosylation factor GTPase-activating protein AGD5	K12486	stromal membrane-associated protein	-	sot04144	Endocytosis	Cellular Processes	Transport and catabolism
TRINITY_DN14524_c1_g8	cam:101494145	40.2	2.6e-69	-	histone-lysine N-methyltransferase EZA1-like	K11430	histone-lysine N-methyltransferase EZH2	EC:2.1.1.43	cam00310	Lysine degradation	Metabolism	Amino acid metabolism
TRINITY_DN14526_c7_g1	smo:SELMODRAFT_423905	43.3	9.3e-29	-	hypothetical protein	K12199	vacuolar protein sorting-associated protein VTA1	-	smo04144	Endocytosis	Cellular Processes	Transport and catabolism
TRINITY_DN14528_c0_g1	csl:COCSUDRAFT_23770	41.6	9.1e-86	NA	NA	NA	NA	NA	NA	NA	NA	NA
TRINITY_DN14530_c3_g2	csl:COCSUDRAFT_48005	33.5	1.2e-24	-	beta-ketoacyl reductase	K10251	17beta-estradiol 17-dehydrogenase / very-long-chain 3-oxoacyl-CoA reductase	EC:1.1.1.62 1.1.1.330	csl00062	Fatty acid elongation	Metabolism	Lipid metabolism
TRINITY_DN14530_c3_g2	csl:COCSUDRAFT_48005	33.5	1.2e-24	-	beta-ketoacyl reductase	K10251	17beta-estradiol 17-dehydrogenase / very-long-chain 3-oxoacyl-CoA reductase	EC:1.1.1.62 1.1.1.330	csl01040	Biosynthesis of unsaturated fatty acids	Metabolism	Lipid metabolism
TRINITY_DN14533_c0_g2	tcc:18597604	45.1	2.3e-18	-	mRNA-capping enzyme	K13917	mRNA-capping enzyme	EC:2.7.7.50 3.6.1.-	tcc03015	mRNA surveillance pathway	Genetic Information Processing	Translation
TRINITY_DN14533_c0_g9	mpp:MICPUCDRAFT_46438	39.3	3.3e-10	-	hypothetical protein	K03258	translation initiation factor 4B	-	mpp03013	RNA transport	Genetic Information Processing	Translation
TRINITY_DN14535_c2_g2	ota:OT_ostta01g00890	54.1	3.5e-41	NA	NA	NA	NA	NA	NA	NA	NA	NA
TRINITY_DN14536_c1_g2	mus:103983682	26.8	1.1e-08	NA	NA	NA	NA	NA	NA	NA	NA	NA
TRINITY_DN14536_c1_g6	ccaj:109788539	83.1	7.6e-71	-	thioredoxin-like protein YLS8	K12859	U5 snRNP protein, DIM1 family	-	ccaj03040	Spliceosome	Genetic Information Processing	Transcription
TRINITY_DN14537_c1_g5	pper:18766584	53.8	8.9e-167	-	DEAD-box ATP-dependent RNA helicase 21	K12858	ATP-dependent RNA helicase DDX23/PRP28	EC:3.6.4.13	pper03040	Spliceosome	Genetic Information Processing	Transcription
TRINITY_DN14537_c1_g7	ccp:CHC_T00008873001	37	1.6e-65	NA	NA	NA	NA	NA	NA	NA	NA	NA
TRINITY_DN14542_c1_g2	mis:MICPUN_65751	64.9	1.2e-160	NA	NA	NA	NA	NA	NA	NA	NA	NA
TRINITY_DN14542_c1_g7	mis:MICPUN_65751	82	1.2e-17	NA	NA	NA	NA	NA	NA	NA	NA	NA
TRINITY_DN14543_c0_g1	csl:COCSUDRAFT_65707	51.9	3.9e-24	-	hypothetical protein	K10586	baculoviral IAP repeat-containing protein 6 (apollon)	EC:2.3.2.23	csl04120	Ubiquitin mediated proteolysis	Genetic Information Processing	Folding, sorting and degradation
TRINITY_DN14544_c2_g7	ats:109740404	44.5	2.8e-34	NA	NA	NA	NA	NA	NA	NA	NA	NA
TRINITY_DN14549_c1_g1	apro:F751_1005	29.7	4.3e-25	NA	NA	NA	NA	NA	NA	NA	NA	NA
TRINITY_DN14550_c2_g2	mdm:103428968	77.7	1.3e-56	NA	NA	NA	NA	NA	NA	NA	NA	NA
TRINITY_DN14550_c2_g4	smo:SELMODRAFT_270661	33.6	1.6e-111	-	hypothetical protein	K14408	cleavage stimulation factor subunit 3	-	smo03015	mRNA surveillance pathway	Genetic Information Processing	Translation
TRINITY_DN14553_c0_g1	csat:104723180	48.5	8.4e-48	-	ras-related protein RABA1d-like	K07904	Ras-related protein Rab-11A	-	csat04144	Endocytosis	Cellular Processes	Transport and catabolism
TRINITY_DN14554_c0_g1	cam:101494817	21	2e-09	-	phosphoethanolamine N-methyltransferase-like	K05929	phosphoethanolamine N-methyltransferase	EC:2.1.1.103	cam00564	Glycerophospholipid metabolism	Metabolism	Lipid metabolism
TRINITY_DN14557_c1_g3	lang:109324995	48.6	4.5e-11	NA	NA	NA	NA	NA	NA	NA	NA	NA
TRINITY_DN14557_c2_g3	atr:18443313	31.5	4e-21	NA	NA	NA	NA	NA	NA	NA	NA	NA
TRINITY_DN14558_c1_g2	bdi:100837259	38.8	7.3e-10	-	E3 ubiquitin-protein ligase CHIP	K09561	STIP1 homology and U-box containing protein 1	EC:2.3.2.27	bdi04141	Protein processing in endoplasmic reticulum	Genetic Information Processing	Folding, sorting and degradation
TRINITY_DN14558_c1_g2	bdi:100837259	38.8	7.3e-10	-	E3 ubiquitin-protein ligase CHIP	K09561	STIP1 homology and U-box containing protein 1	EC:2.3.2.27	bdi04120	Ubiquitin mediated proteolysis	Genetic Information Processing	Folding, sorting and degradation
TRINITY_DN14559_c0_g3	ccp:CHC_T00008818001	37.5	2.8e-43	NA	NA	NA	NA	NA	NA	NA	NA	NA
TRINITY_DN14560_c0_g4	smo:SELMODRAFT_447169	22.2	3.5e-25	NA	NA	NA	NA	NA	NA	NA	NA	NA
TRINITY_DN14561_c0_g1	smo:SELMODRAFT_168165	26	6.6e-09	NA	NA	NA	NA	NA	NA	NA	NA	NA
TRINITY_DN14563_c1_g1	mpp:MICPUCDRAFT_13559	33.2	1.4e-13	NA	NA	NA	NA	NA	NA	NA	NA	NA
TRINITY_DN14563_c2_g1	dct:110113682	33.9	2.3e-27	NA	NA	NA	NA	NA	NA	NA	NA	NA
TRINITY_DN14563_c2_g3	apro:F751_0367	41.7	5.6e-39	NA	NA	NA	NA	NA	NA	NA	NA	NA
TRINITY_DN14565_c3_g1	nnu:104593799	27	5.5e-30	NA	NA	NA	NA	NA	NA	NA	NA	NA
TRINITY_DN14565_c3_g3	ghi:107938202	39.7	4.2e-43	-	ras-related protein RABE1c-like isoform X1	K07901	Ras-related protein Rab-8A	-	ghi04144	Endocytosis	Cellular Processes	Transport and catabolism
TRINITY_DN14568_c0_g1	ats:109748562	52.7	1.7e-49	LOC109748562	acetyl-CoA acetyltransferase, cytosolic 1-like	K00626	acetyl-CoA C-acetyltransferase	EC:2.3.1.9	ats00620	Pyruvate metabolism	Metabolism	Carbohydrate metabolism
TRINITY_DN14568_c0_g1	ats:109748562	52.7	1.7e-49	LOC109748562	acetyl-CoA acetyltransferase, cytosolic 1-like	K00626	acetyl-CoA C-acetyltransferase	EC:2.3.1.9	ats00630	Glyoxylate and dicarboxylate metabolism	Metabolism	Carbohydrate metabolism
TRINITY_DN14568_c0_g1	ats:109748562	52.7	1.7e-49	LOC109748562	acetyl-CoA acetyltransferase, cytosolic 1-like	K00626	acetyl-CoA C-acetyltransferase	EC:2.3.1.9	ats00640	Propanoate metabolism	Metabolism	Carbohydrate metabolism
TRINITY_DN14568_c0_g1	ats:109748562	52.7	1.7e-49	LOC109748562	acetyl-CoA acetyltransferase, cytosolic 1-like	K00626	acetyl-CoA C-acetyltransferase	EC:2.3.1.9	ats00650	Butanoate metabolism	Metabolism	Carbohydrate metabolism
TRINITY_DN14568_c0_g1	ats:109748562	52.7	1.7e-49	LOC109748562	acetyl-CoA acetyltransferase, cytosolic 1-like	K00626	acetyl-CoA C-acetyltransferase	EC:2.3.1.9	ats00071	Fatty acid degradation	Metabolism	Lipid metabolism
TRINITY_DN14568_c0_g1	ats:109748562	52.7	1.7e-49	LOC109748562	acetyl-CoA acetyltransferase, cytosolic 1-like	K00626	acetyl-CoA C-acetyltransferase	EC:2.3.1.9	ats00072	Synthesis and degradation of ketone bodies	Metabolism	Lipid metabolism
TRINITY_DN14568_c0_g1	ats:109748562	52.7	1.7e-49	LOC109748562	acetyl-CoA acetyltransferase, cytosolic 1-like	K00626	acetyl-CoA C-acetyltransferase	EC:2.3.1.9	ats00280	Valine, leucine and isoleucine degradation	Metabolism	Amino acid metabolism
TRINITY_DN14568_c0_g1	ats:109748562	52.7	1.7e-49	LOC109748562	acetyl-CoA acetyltransferase, cytosolic 1-like	K00626	acetyl-CoA C-acetyltransferase	EC:2.3.1.9	ats00310	Lysine degradation	Metabolism	Amino acid metabolism
TRINITY_DN14568_c0_g1	ats:109748562	52.7	1.7e-49	LOC109748562	acetyl-CoA acetyltransferase, cytosolic 1-like	K00626	acetyl-CoA C-acetyltransferase	EC:2.3.1.9	ats00380	Tryptophan metabolism	Metabolism	Amino acid metabolism
TRINITY_DN14568_c0_g1	ats:109748562	52.7	1.7e-49	LOC109748562	acetyl-CoA acetyltransferase, cytosolic 1-like	K00626	acetyl-CoA C-acetyltransferase	EC:2.3.1.9	ats00900	Terpenoid backbone biosynthesis	Metabolism	Metabolism of terpenoids and polyketides
TRINITY_DN14569_c0_g1	soe:110801981	28	4.4e-21	NA	NA	NA	NA	NA	NA	NA	NA	NA
TRINITY_DN14573_c1_g2	gsl:Gasu_06240	38.1	9.4e-27	-	pentafunctional 3-hydroxyacyl-CoA dehydrogenase / enoyl-CoA hydratase /3-hydroxyacyl-CoA epimerase / enoyl-CoA isomerase / 3-ketoacyl-CoA thiolase	K13239	Delta3-Delta2-enoyl-CoA isomerase	EC:5.3.3.8	gsl00071	Fatty acid degradation	Metabolism	Lipid metabolism
TRINITY_DN14573_c1_g2	gsl:Gasu_06240	38.1	9.4e-27	-	pentafunctional 3-hydroxyacyl-CoA dehydrogenase / enoyl-CoA hydratase /3-hydroxyacyl-CoA epimerase / enoyl-CoA isomerase / 3-ketoacyl-CoA thiolase	K13239	Delta3-Delta2-enoyl-CoA isomerase	EC:5.3.3.8	gsl04146	Peroxisome	Cellular Processes	Transport and catabolism
TRINITY_DN14577_c0_g3	cvr:CHLNCDRAFT_33302	69.4	8.4e-51	-	hypothetical protein	K07904	Ras-related protein Rab-11A	-	cvr04144	Endocytosis	Cellular Processes	Transport and catabolism
TRINITY_DN14578_c1_g1	nnu:104608010	45	5.7e-78	NA	NA	NA	NA	NA	NA	NA	NA	NA
TRINITY_DN14583_c1_g1	lang:109331853	48.3	4.7e-112	-	AP-2 complex subunit mu-like	K11826	AP-2 complex subunit mu-1	-	lang04144	Endocytosis	Cellular Processes	Transport and catabolism
TRINITY_DN14583_c1_g6	egu:105060111	38.8	4.7e-57	NA	NA	NA	NA	NA	NA	NA	NA	NA
TRINITY_DN14585_c3_g2	apro:F751_2727	68.9	8.9e-26	NA	NA	NA	NA	NA	NA	NA	NA	NA
TRINITY_DN14585_c3_g3	mtr:MTR_5g008010	47.6	3.9e-102	-	anaphase-promoting complex subunit cdc20-like protein	K03363	cell division cycle 20, cofactor of APC complex	-	mtr04120	Ubiquitin mediated proteolysis	Genetic Information Processing	Folding, sorting and degradation
TRINITY_DN14589_c0_g2	cre:CHLREDRAFT_196676	38.8	1e-13	NA	NA	NA	NA	NA	NA	NA	NA	NA
TRINITY_DN14591_c0_g1	adu:107493416	27.3	3.9e-07	-	adenylate kinase 1	K00939	adenylate kinase	EC:2.7.4.3	adu00230	Purine metabolism	Metabolism	Nucleotide metabolism
TRINITY_DN14591_c0_g1	adu:107493416	27.3	3.9e-07	-	adenylate kinase 1	K00939	adenylate kinase	EC:2.7.4.3	adu00730	Thiamine metabolism	Metabolism	Metabolism of cofactors and vitamins
TRINITY_DN14592_c0_g1	soe:110774858	57.4	2.7e-10	NA	NA	NA	NA	NA	NA	NA	NA	NA
TRINITY_DN14593_c3_g2	atr:18422813	52.1	6e-07	-	transcription initiation factor IIA large subunit	K03122	transcription initiation factor TFIIA large subunit	-	atr03022	Basal transcription factors	Genetic Information Processing	Transcription
TRINITY_DN14593_c3_g4	sind:105172419	36.5	2.8e-37	-	protein disulfide-isomerase like 2-1	K09584	protein disulfide-isomerase A6	EC:5.3.4.1	sind04141	Protein processing in endoplasmic reticulum	Genetic Information Processing	Folding, sorting and degradation
TRINITY_DN14597_c4_g1	gmx:100785814	52.8	3.7e-66	-	peptidyl-prolyl cis-trans isomerase CYP65-like	K10598	peptidyl-prolyl cis-trans isomerase-like 2	EC:5.2.1.8	gmx04120	Ubiquitin mediated proteolysis	Genetic Information Processing	Folding, sorting and degradation
TRINITY_DN14602_c1_g3	cre:CHLREDRAFT_115639	42.8	1.1e-33	FAP160	acid phosphatase	K13024	inositol-hexakisphosphate/diphosphoinositol-pentakisphosphate 1-kinase	EC:2.7.4.24	cre04070	Phosphatidylinositol signaling system	Environmental Information Processing	Signal transduction
TRINITY_DN14608_c5_g1	obr:102699610	56.1	3.5e-120	-	serine/threonine protein phosphatase 2A 57 kDa regulatory subunit B' theta isoform-like	K11584	serine/threonine-protein phosphatase 2A regulatory subunit B'	-	obr03015	mRNA surveillance pathway	Genetic Information Processing	Translation
TRINITY_DN14610_c3_g1	cre:CHLREDRAFT_116267	47.3	7.5e-52	PYR5	uridine 5'- monophosphate synthase	K13421	uridine monophosphate synthetase	EC:2.4.2.10 4.1.1.23	cre00240	Pyrimidine metabolism	Metabolism	Nucleotide metabolism
TRINITY_DN14610_c3_g3	mtr:MTR_3g017580	50.5	1.1e-24	-	uridine 5-monophosphate synthase-like protein	K13421	uridine monophosphate synthetase	EC:2.4.2.10 4.1.1.23	mtr00240	Pyrimidine metabolism	Metabolism	Nucleotide metabolism
TRINITY_DN14610_c4_g2	cre:CHLREDRAFT_196567	68.8	1.6e-113	IDH3	isocitrate dehydrogenase, NADP-dependent	K00031	isocitrate dehydrogenase	EC:1.1.1.42	cre00020	Citrate cycle (TCA cycle)	Metabolism	Carbohydrate metabolism
TRINITY_DN14610_c4_g2	cre:CHLREDRAFT_196567	68.8	1.6e-113	IDH3	isocitrate dehydrogenase, NADP-dependent	K00031	isocitrate dehydrogenase	EC:1.1.1.42	cre00480	Glutathione metabolism	Metabolism	Metabolism of other amino acids
TRINITY_DN14610_c4_g2	cre:CHLREDRAFT_196567	68.8	1.6e-113	IDH3	isocitrate dehydrogenase, NADP-dependent	K00031	isocitrate dehydrogenase	EC:1.1.1.42	cre04146	Peroxisome	Cellular Processes	Transport and catabolism
TRINITY_DN14611_c1_g7	csat:104773116	35.8	9.8e-09	NA	NA	NA	NA	NA	NA	NA	NA	NA
TRINITY_DN14612_c1_g1	cam:101499912	39.6	1.8e-108	-	eukaryotic translation initiation factor 3 subunit C	K03252	translation initiation factor 3 subunit C	-	cam03013	RNA transport	Genetic Information Processing	Translation
TRINITY_DN14612_c1_g4	adu:107488548	41.2	8.5e-11	-	eukaryotic translation initiation factor 3 subunit C	K03252	translation initiation factor 3 subunit C	-	adu03013	RNA transport	Genetic Information Processing	Translation
TRINITY_DN14615_c0_g1	cre:CHLREDRAFT_130324	36.4	1.9e-168	NA	NA	NA	NA	NA	NA	NA	NA	NA
TRINITY_DN14619_c0_g1	bpg:Bathy01g03700	55.1	2.2e-162	-	hypothetical protein	K22182	thioredoxin reductase (NADPH)	EC:1.8.1.9	bpg00450	Selenocompound metabolism	Metabolism	Metabolism of other amino acids
TRINITY_DN14619_c0_g6	sind:105170469	71.8	1.3e-268	-	heat shock cognate protein 80	K04079	molecular chaperone HtpG	-	sind04141	Protein processing in endoplasmic reticulum	Genetic Information Processing	Folding, sorting and degradation
TRINITY_DN14619_c0_g6	sind:105170469	71.8	1.3e-268	-	heat shock cognate protein 80	K04079	molecular chaperone HtpG	-	sind04626	Plant-pathogen interaction	Organismal Systems	Environmental adaptation
TRINITY_DN14623_c3_g1	smo:SELMODRAFT_140315	58.9	3e-298	-	hypothetical protein	K14521	N-acetyltransferase 10	EC:2.3.1.-	smo03008	Ribosome biogenesis in eukaryotes	Genetic Information Processing	Translation
TRINITY_DN14623_c4_g1	lja:Lj6g3v0802280.1	24.1	3.1e-07	Lj6g3v0802280.1	-	K14411	RNA-binding protein Musashi	-	lja03015	mRNA surveillance pathway	Genetic Information Processing	Translation
TRINITY_DN14623_c4_g5	gsl:Gasu_30930	41.5	1.4e-18	NA	NA	NA	NA	NA	NA	NA	NA	NA
TRINITY_DN14625_c3_g2	gsl:Gasu_02300	42.9	1.2e-63	NA	NA	NA	NA	NA	NA	NA	NA	NA
TRINITY_DN14629_c1_g1	smo:SELMODRAFT_453384	49.6	6.8e-30	NA	NA	NA	NA	NA	NA	NA	NA	NA
TRINITY_DN14629_c1_g10	cvr:CHLNCDRAFT_58681	29.3	3.2e-08	NA	NA	NA	NA	NA	NA	NA	NA	NA
TRINITY_DN14631_c0_g1	apro:F751_0394	42.8	1.4e-32	NA	NA	NA	NA	NA	NA	NA	NA	NA
TRINITY_DN14631_c0_g10	ccp:CHC_T00004925001	37.3	1.8e-29	-	hypothetical protein	K19199	histone-lysine N-methyltransferase SETD3	EC:2.1.1.43	ccp00310	Lysine degradation	Metabolism	Amino acid metabolism
TRINITY_DN14631_c0_g14	ini:109180691	39.8	6e-16	NA	NA	NA	NA	NA	NA	NA	NA	NA
TRINITY_DN14631_c0_g8	thj:104826715	32.9	1.8e-26	NA	NA	NA	NA	NA	NA	NA	NA	NA
TRINITY_DN14637_c1_g1	smo:SELMODRAFT_431654	27.1	7.5e-10	NA	NA	NA	NA	NA	NA	NA	NA	NA
TRINITY_DN14637_c3_g3	smo:SELMODRAFT_148807	60.5	4.9e-79	-	hypothetical protein	K11188	peroxiredoxin 6, 1-Cys peroxiredoxin	EC:1.11.1.7 1.11.1.15 3.1.1.-	smo00940	Phenylpropanoid biosynthesis	Metabolism	Biosynthesis of other secondary metabolites
TRINITY_DN14638_c0_g4	cme:CYME_CMN051C	40.1	1.1e-20	-	similar to 6-pyruvoyltetrahydropterin synthase	K01737	6-pyruvoyltetrahydropterin/6-carboxytetrahydropterin synthase	EC:4.2.3.12 4.1.2.50	cme00790	Folate biosynthesis	Metabolism	Metabolism of cofactors and vitamins
TRINITY_DN14641_c0_g1	ccp:CHC_T00004428001	35.5	6.3e-21	-	hypothetical protein	K00760	hypoxanthine phosphoribosyltransferase	EC:2.4.2.8	ccp00230	Purine metabolism	Metabolism	Nucleotide metabolism
TRINITY_DN14642_c0_g1	mdm:103432582	34.5	5.8e-127	-	ABC transporter C family member 14-like	K05666	ATP-binding cassette, subfamily C (CFTR/MRP), member 2	-	mdm02010	ABC transporters	Environmental Information Processing	Membrane transport
TRINITY_DN14644_c0_g3	apro:F751_0758	31.6	7.5e-11	NA	NA	NA	NA	NA	NA	NA	NA	NA
TRINITY_DN14644_c0_g4	mng:MNEG_11821	58.2	6.8e-31	-	inositolhexakisphosphate/diphosphoinositol- pentakisphosphatekinase	K13024	inositol-hexakisphosphate/diphosphoinositol-pentakisphosphate 1-kinase	EC:2.7.4.24	mng04070	Phosphatidylinositol signaling system	Environmental Information Processing	Signal transduction
TRINITY_DN14644_c0_g5	osa:4329409	53.9	1.6e-63	-	DNA repair protein RAD50 isoform X1	K10866	DNA repair protein RAD50	EC:3.6.-.-	osa03440	Homologous recombination	Genetic Information Processing	Replication and repair
TRINITY_DN14644_c0_g5	osa:4329409	53.9	1.6e-63	-	DNA repair protein RAD50 isoform X1	K10866	DNA repair protein RAD50	EC:3.6.-.-	osa03450	Non-homologous end-joining	Genetic Information Processing	Replication and repair
TRINITY_DN14645_c0_g1	gra:105765242	43.8	2.7e-07	-	serine/arginine-rich splicing factor SR45a-like	K12897	transformer-2 protein	-	gra03040	Spliceosome	Genetic Information Processing	Transcription
TRINITY_DN14646_c1_g2	cme:CYME_CMI015C	74.5	6.8e-13	NA	NA	NA	NA	NA	NA	NA	NA	NA
TRINITY_DN14646_c4_g2	vra:106762438	31.7	6.5e-09	NA	NA	NA	NA	NA	NA	NA	NA	NA
TRINITY_DN14646_c4_g6	rcu:8265515	45.7	2.3e-71	-	probable 3-hydroxyisobutyrate dehydrogenase	K00020	3-hydroxyisobutyrate dehydrogenase	EC:1.1.1.31	rcu00280	Valine, leucine and isoleucine degradation	Metabolism	Amino acid metabolism
TRINITY_DN14647_c1_g1	gsl:Gasu_38670	56.3	3.4e-123	-	cystathionine gamma-lyase	K01758	cystathionine gamma-lyase	EC:4.4.1.1	gsl00260	Glycine, serine and threonine metabolism	Metabolism	Amino acid metabolism
TRINITY_DN14647_c1_g1	gsl:Gasu_38670	56.3	3.4e-123	-	cystathionine gamma-lyase	K01758	cystathionine gamma-lyase	EC:4.4.1.1	gsl00270	Cysteine and methionine metabolism	Metabolism	Amino acid metabolism
TRINITY_DN14647_c1_g1	gsl:Gasu_38670	56.3	3.4e-123	-	cystathionine gamma-lyase	K01758	cystathionine gamma-lyase	EC:4.4.1.1	gsl00450	Selenocompound metabolism	Metabolism	Metabolism of other amino acids
TRINITY_DN14650_c1_g1	pxb:103944303	31.5	3.8e-26	-	serine/threonine-protein kinase CTR1-like isoform X1	K14510	serine/threonine-protein kinase CTR1	EC:2.7.11.1	pxb04016	MAPK signaling pathway - plant	Environmental Information Processing	Signal transduction
TRINITY_DN14650_c1_g1	pxb:103944303	31.5	3.8e-26	-	serine/threonine-protein kinase CTR1-like isoform X1	K14510	serine/threonine-protein kinase CTR1	EC:2.7.11.1	pxb04075	Plant hormone signal transduction	Environmental Information Processing	Signal transduction
TRINITY_DN14650_c1_g2	ccaj:109801209	26.8	1.7e-10	-	palmitoyl-protein thioesterase 1-like	K01074	palmitoyl-protein thioesterase	EC:3.1.2.22	ccaj00062	Fatty acid elongation	Metabolism	Lipid metabolism
TRINITY_DN14653_c2_g1	gsl:Gasu_02670	52.3	1.3e-44	NA	NA	NA	NA	NA	NA	NA	NA	NA
TRINITY_DN14653_c2_g2	mus:103991217	85.2	1e-119	-	V-type proton ATPase subunit B2	K02147	V-type H+-transporting ATPase subunit B	-	mus00190	Oxidative phosphorylation	Metabolism	Energy metabolism
TRINITY_DN14653_c2_g2	mus:103991217	85.2	1e-119	-	V-type proton ATPase subunit B2	K02147	V-type H+-transporting ATPase subunit B	-	mus04145	Phagosome	Cellular Processes	Transport and catabolism
TRINITY_DN14654_c2_g1	sot:102594730	30.3	1.7e-16	-	mitogen-activated protein kinase kinase kinase A	K20716	mitogen-activated protein kinase kinase kinase 17/18	-	sot04016	MAPK signaling pathway - plant	Environmental Information Processing	Signal transduction
TRINITY_DN14654_c2_g2	ccp:ChcroMp11	70.4	6.9e-19	atp9	ATP synthase F0 subunit 9	K02128	F-type H+-transporting ATPase subunit c	-	ccp00190	Oxidative phosphorylation	Metabolism	Energy metabolism
TRINITY_DN14655_c2_g1	thj:104820330	46.8	7.5e-105	NA	NA	NA	NA	NA	NA	NA	NA	NA
TRINITY_DN14657_c0_g1	han:110908530	29.9	1.8e-60	NA	NA	NA	NA	NA	NA	NA	NA	NA
TRINITY_DN14660_c1_g4	zma:100282166	46.5	9.9e-28	NA	NA	NA	NA	NA	NA	NA	NA	NA
TRINITY_DN14660_c1_g7	zma:100283703	47.2	2e-63	NA	NA	NA	NA	NA	NA	NA	NA	NA
TRINITY_DN14661_c1_g1	brp:103853487	61	6.1e-108	NA	NA	NA	NA	NA	NA	NA	NA	NA
TRINITY_DN14661_c1_g3	smo:SELMODRAFT_80851	69.2	1.5e-10	NA	NA	NA	NA	NA	NA	NA	NA	NA
TRINITY_DN14663_c2_g1	ini:109189183	49	2.7e-305	-	protein EXPORTIN 1A-like	K14290	exportin-1	-	ini03013	RNA transport	Genetic Information Processing	Translation
TRINITY_DN14663_c2_g1	ini:109189183	49	2.7e-305	-	protein EXPORTIN 1A-like	K14290	exportin-1	-	ini03008	Ribosome biogenesis in eukaryotes	Genetic Information Processing	Translation
TRINITY_DN14664_c2_g2	mpp:MICPUCDRAFT_48127	44.3	2e-85	-	major facilitator superfamily	K03372	MFS transporter, PAT family, solute carrier family 33 (acetyl-CoA transportor), member 1	EC:2.3.1.-	mpp00604	Glycosphingolipid biosynthesis - ganglio series	Metabolism	Glycan biosynthesis and metabolism
TRINITY_DN14666_c0_g4	ota:OT_ostta09g03780	53.2	3.4e-28	NA	NA	NA	NA	NA	NA	NA	NA	NA
TRINITY_DN14667_c2_g1	cann:107871247	58.7	8.2e-178	-	chaperonin CPN60-2	K04077	chaperonin GroEL	-	cann03018	RNA degradation	Genetic Information Processing	Folding, sorting and degradation
TRINITY_DN14673_c0_g1	han:110865830	34.3	9.1e-32	-	serine/threonine-protein kinase CTR1-like	K14510	serine/threonine-protein kinase CTR1	EC:2.7.11.1	han04016	MAPK signaling pathway - plant	Environmental Information Processing	Signal transduction
TRINITY_DN14673_c0_g1	han:110865830	34.3	9.1e-32	-	serine/threonine-protein kinase CTR1-like	K14510	serine/threonine-protein kinase CTR1	EC:2.7.11.1	han04075	Plant hormone signal transduction	Environmental Information Processing	Signal transduction
TRINITY_DN14681_c0_g2	ccaj:109817543	33	1.3e-25	NA	NA	NA	NA	NA	NA	NA	NA	NA
TRINITY_DN14693_c1_g3	smo:SELMODRAFT_75337	35.1	4.7e-26	-	hypothetical protein	K03011	DNA-directed RNA polymerase II subunit RPB3	-	smo00230	Purine metabolism	Metabolism	Nucleotide metabolism
TRINITY_DN14693_c1_g3	smo:SELMODRAFT_75337	35.1	4.7e-26	-	hypothetical protein	K03011	DNA-directed RNA polymerase II subunit RPB3	-	smo00240	Pyrimidine metabolism	Metabolism	Nucleotide metabolism
TRINITY_DN14693_c1_g3	smo:SELMODRAFT_75337	35.1	4.7e-26	-	hypothetical protein	K03011	DNA-directed RNA polymerase II subunit RPB3	-	smo03020	RNA polymerase	Genetic Information Processing	Transcription
TRINITY_DN14693_c3_g1	gsl:Gasu_51560	36.4	2.4e-78	-	GMP synthase (glutamine-hydrolysing)	K01951	GMP synthase (glutamine-hydrolysing)	EC:6.3.5.2	gsl00230	Purine metabolism	Metabolism	Nucleotide metabolism
TRINITY_DN14694_c1_g3	han:110914163	28.8	1.3e-21	NA	NA	NA	NA	NA	NA	NA	NA	NA
TRINITY_DN14694_c1_g4	apro:F751_5780	31.9	6.9e-36	NA	NA	NA	NA	NA	NA	NA	NA	NA
TRINITY_DN14695_c2_g1	cmo:103487881	28.1	6.4e-19	NA	NA	NA	NA	NA	NA	NA	NA	NA
TRINITY_DN14697_c5_g1	han:110865634	36.2	5.4e-15	-	signal recognition particle receptor subunit alpha homolog	K13431	signal recognition particle receptor subunit alpha	-	han03060	Protein export	Genetic Information Processing	Folding, sorting and degradation
TRINITY_DN14697_c5_g2	bvg:104895378	52.4	2.3e-90	-	signal recognition particle receptor subunit alpha	K13431	signal recognition particle receptor subunit alpha	-	bvg03060	Protein export	Genetic Information Processing	Folding, sorting and degradation
TRINITY_DN14703_c0_g4	cre:CHLREDRAFT_78954	69.7	2.7e-46	CRT2	calreticulin 2, calcium-binding protein	K08057	calreticulin	-	cre04141	Protein processing in endoplasmic reticulum	Genetic Information Processing	Folding, sorting and degradation
TRINITY_DN14703_c0_g4	cre:CHLREDRAFT_78954	69.7	2.7e-46	CRT2	calreticulin 2, calcium-binding protein	K08057	calreticulin	-	cre04145	Phagosome	Cellular Processes	Transport and catabolism
TRINITY_DN14705_c0_g4	nta:107780675	54.3	4.4e-06	-	protein transport protein Sec61 subunit beta-like	K09481	protein transport protein SEC61 subunit beta	-	nta03060	Protein export	Genetic Information Processing	Folding, sorting and degradation
TRINITY_DN14705_c0_g4	nta:107780675	54.3	4.4e-06	-	protein transport protein Sec61 subunit beta-like	K09481	protein transport protein SEC61 subunit beta	-	nta04141	Protein processing in endoplasmic reticulum	Genetic Information Processing	Folding, sorting and degradation
TRINITY_DN14705_c0_g4	nta:107780675	54.3	4.4e-06	-	protein transport protein Sec61 subunit beta-like	K09481	protein transport protein SEC61 subunit beta	-	nta04145	Phagosome	Cellular Processes	Transport and catabolism
TRINITY_DN14706_c1_g2	cre:CHLREDRAFT_101935	36.8	9.4e-47	PDE1	3',5'-cyclic-nucleotide phosphodiesterase	K18437	high affinity cAMP-specific and IBMX-insensitive 3',5'-cyclic phosphodiesterase 8	EC:3.1.4.53	cre00230	Purine metabolism	Metabolism	Nucleotide metabolism
TRINITY_DN14706_c1_g5	ath:AT1G09630	34.3	1.5e-09	RAB11c	RAB GTPase 11C	K07904	Ras-related protein Rab-11A	-	ath04144	Endocytosis	Cellular Processes	Transport and catabolism
TRINITY_DN14707_c0_g10	vvi:100257947	31	6.5e-38	NA	NA	NA	NA	NA	NA	NA	NA	NA
TRINITY_DN14709_c0_g1	obr:102709407	35.4	7.2e-27	NA	NA	NA	NA	NA	NA	NA	NA	NA
TRINITY_DN14715_c3_g1	nta:107783778	53.8	2.8e-23	-	DNA-repair protein XRCC1-like	K10803	DNA-repair protein XRCC1	-	nta03410	Base excision repair	Genetic Information Processing	Replication and repair
TRINITY_DN14717_c3_g2	dct:110113682	31.2	8.7e-19	NA	NA	NA	NA	NA	NA	NA	NA	NA
TRINITY_DN14718_c1_g1	spen:107008325	47.4	5.1e-85	-	mitogen-activated protein kinase homolog MMK2	K20600	mitogen-activated protein kinase 4	EC:2.7.11.24	spen04016	MAPK signaling pathway - plant	Environmental Information Processing	Signal transduction
TRINITY_DN14718_c1_g5	ats:109771574	44.7	3.3e-99	LOC109771574	alpha-aminoadipic semialdehyde synthase isoform X1	K14157	alpha-aminoadipic semialdehyde synthase	EC:1.5.1.8 1.5.1.9	ats00310	Lysine degradation	Metabolism	Amino acid metabolism
TRINITY_DN14718_c1_g6	cre:CHLREDRAFT_188195	55.7	1.4e-15	NA	NA	NA	NA	NA	NA	NA	NA	NA
TRINITY_DN14727_c0_g2	gsl:Gasu_32740	27.8	4.6e-15	-	phosphatidylinositol-bisphosphatase	K01099	inositol polyphosphate 5-phosphatase INPP5B/F	EC:3.1.3.36	gsl00562	Inositol phosphate metabolism	Metabolism	Carbohydrate metabolism
TRINITY_DN14727_c0_g2	gsl:Gasu_32740	27.8	4.6e-15	-	phosphatidylinositol-bisphosphatase	K01099	inositol polyphosphate 5-phosphatase INPP5B/F	EC:3.1.3.36	gsl04070	Phosphatidylinositol signaling system	Environmental Information Processing	Signal transduction
TRINITY_DN14727_c0_g3	mis:MICPUN_95598	32.2	1.9e-11	-	predicted protein	K12611	mRNA-decapping enzyme 1B	EC:3.-.-.-	mis03018	RNA degradation	Genetic Information Processing	Folding, sorting and degradation
TRINITY_DN14731_c0_g1	mng:MNEG_3544	60.3	2e-13	-	putative AAA domain-containing protein	K14571	ribosome biogenesis ATPase	-	mng03008	Ribosome biogenesis in eukaryotes	Genetic Information Processing	Translation
TRINITY_DN14732_c1_g1	cme:CYME_CMP217C	31.7	3.2e-21	-	probable NAD(P) dependent 3-beta-hydroxysteroid dehydrogenase	K07748	sterol-4alpha-carboxylate 3-dehydrogenase (decarboxylating)	EC:1.1.1.170	cme00100	Steroid biosynthesis	Metabolism	Lipid metabolism
TRINITY_DN14734_c1_g1	sind:105167757	51.1	5.3e-07	NA	NA	NA	NA	NA	NA	NA	NA	NA
TRINITY_DN14734_c4_g4	ats:109779224	30.1	6.3e-34	LOC109779224	choline/ethanolaminephosphotransferase 1-like	K00993	ethanolaminephosphotransferase	EC:2.7.8.1	ats00564	Glycerophospholipid metabolism	Metabolism	Lipid metabolism
TRINITY_DN14734_c4_g4	ats:109779224	30.1	6.3e-34	LOC109779224	choline/ethanolaminephosphotransferase 1-like	K00993	ethanolaminephosphotransferase	EC:2.7.8.1	ats00565	Ether lipid metabolism	Metabolism	Lipid metabolism
TRINITY_DN14734_c4_g4	ats:109779224	30.1	6.3e-34	LOC109779224	choline/ethanolaminephosphotransferase 1-like	K00993	ethanolaminephosphotransferase	EC:2.7.8.1	ats00440	Phosphonate and phosphinate metabolism	Metabolism	Metabolism of other amino acids
TRINITY_DN14735_c0_g1	mis:MICPUN_61426	46.3	6.4e-57	NA	NA	NA	NA	NA	NA	NA	NA	NA
TRINITY_DN14737_c0_g14	mus:103991349	71.6	5.4e-142	NA	NA	NA	NA	NA	NA	NA	NA	NA
TRINITY_DN14737_c0_g3	soe:110802181	56.9	2.3e-93	-	26S proteasome non-ATPase regulatory subunit 7 homolog A-like	K03038	26S proteasome regulatory subunit N8	-	soe03050	Proteasome	Genetic Information Processing	Folding, sorting and degradation
TRINITY_DN14739_c0_g1	mis:MICPUN_92955	59.2	6e-220	NA	NA	NA	NA	NA	NA	NA	NA	NA
TRINITY_DN14739_c1_g1	egu:105051092	40.9	5.9e-06	NA	NA	NA	NA	NA	NA	NA	NA	NA
TRINITY_DN14740_c2_g6	ini:109165075	40	7.8e-48	-	exonuclease 1	K10746	exonuclease 1	EC:3.1.-.-	ini03430	Mismatch repair	Genetic Information Processing	Replication and repair
TRINITY_DN14745_c0_g10	pxb:103942639	38.9	1e-17	NA	NA	NA	NA	NA	NA	NA	NA	NA
TRINITY_DN14747_c0_g2	fve:101311565	28.9	3.1e-49	NA	NA	NA	NA	NA	NA	NA	NA	NA
TRINITY_DN14750_c0_g1	smo:SELMODRAFT_270274	83.3	6.8e-33	Rab8b-1	rab family GTPase	K07901	Ras-related protein Rab-8A	-	smo04144	Endocytosis	Cellular Processes	Transport and catabolism
TRINITY_DN14754_c0_g2	egr:108958286	31.4	1.1e-28	NA	NA	NA	NA	NA	NA	NA	NA	NA
TRINITY_DN14757_c1_g3	pda:103715747	36.8	7.7e-51	-	pre-mRNA-splicing factor 18-like	K12817	pre-mRNA-splicing factor 18	-	pda03040	Spliceosome	Genetic Information Processing	Transcription
TRINITY_DN14762_c1_g2	obr:102706264	68.9	7.5e-92	-	40S ribosomal protein S3a-like	K02984	small subunit ribosomal protein S3Ae	-	obr03010	Ribosome	Genetic Information Processing	Translation
TRINITY_DN14762_c3_g1	sind:105177978	54.5	1.4e-27	-	LOW QUALITY PROTEIN: U1 small nuclear ribonucleoprotein 70 kDa	K11093	U1 small nuclear ribonucleoprotein 70kDa	-	sind03040	Spliceosome	Genetic Information Processing	Transcription
TRINITY_DN14762_c3_g2	zju:107424843	53.3	2.7e-15	-	U1 small nuclear ribonucleoprotein 70 kDa isoform X1	K11093	U1 small nuclear ribonucleoprotein 70kDa	-	zju03040	Spliceosome	Genetic Information Processing	Transcription
TRINITY_DN14766_c0_g2	smo:SELMODRAFT_233387	32.2	1.1e-29	NA	NA	NA	NA	NA	NA	NA	NA	NA
TRINITY_DN14768_c2_g2	cme:CYME_CMF097C	43.9	7.9e-25	-	D-ribulokinase	K00875	D-ribulokinase	EC:2.7.1.47	cme00040	Pentose and glucuronate interconversions	Metabolism	Carbohydrate metabolism
TRINITY_DN14770_c0_g3	sbi:110430546	50.8	3e-45	-	serine/arginine-rich-splicing factor SR34-like isoform X1	K12890	splicing factor, arginine/serine-rich 1	-	sbi03040	Spliceosome	Genetic Information Processing	Transcription
TRINITY_DN14770_c1_g5	mus:103999996	30.3	3.1e-10	-	vesicle-associated membrane protein 714-like isoform X1	K08515	vesicle-associated membrane protein 7	-	mus04130	SNARE interactions in vesicular transport	Genetic Information Processing	Folding, sorting and degradation
TRINITY_DN14775_c0_g2	mcha:111010571	37.1	6e-25	-	GDP-L-galactose phosphorylase 2	K14190	GDP-L-galactose phosphorylase	EC:2.7.7.69	mcha00053	Ascorbate and aldarate metabolism	Metabolism	Carbohydrate metabolism
TRINITY_DN14775_c0_g3	ccp:CHC_T00009559001	55.6	4.9e-24	-	glyoxylate reductase/hydroxypyruvate reductase	K00049	glyoxylate/hydroxypyruvate reductase	EC:1.1.1.79 1.1.1.81	ccp00620	Pyruvate metabolism	Metabolism	Carbohydrate metabolism
TRINITY_DN14775_c0_g3	ccp:CHC_T00009559001	55.6	4.9e-24	-	glyoxylate reductase/hydroxypyruvate reductase	K00049	glyoxylate/hydroxypyruvate reductase	EC:1.1.1.79 1.1.1.81	ccp00630	Glyoxylate and dicarboxylate metabolism	Metabolism	Carbohydrate metabolism
TRINITY_DN14775_c0_g3	ccp:CHC_T00009559001	55.6	4.9e-24	-	glyoxylate reductase/hydroxypyruvate reductase	K00049	glyoxylate/hydroxypyruvate reductase	EC:1.1.1.79 1.1.1.81	ccp00260	Glycine, serine and threonine metabolism	Metabolism	Amino acid metabolism
TRINITY_DN14775_c0_g4	lja:Lj3g3v2720150.1	34	9.3e-26	Lj3g3v2720150.1	-	K15919	hydroxypyruvate reductase 2	-	lja00630	Glyoxylate and dicarboxylate metabolism	Metabolism	Carbohydrate metabolism
TRINITY_DN14775_c0_g4	lja:Lj3g3v2720150.1	34	9.3e-26	Lj3g3v2720150.1	-	K15919	hydroxypyruvate reductase 2	-	lja00260	Glycine, serine and threonine metabolism	Metabolism	Amino acid metabolism
TRINITY_DN14776_c0_g1	thj:104818795	29.8	8.8e-14	-	dual specificity protein phosphatase 1B	K20551	dual specificity protein phosphatase 1B	EC:3.1.3.16 3.1.3.48	thj04016	MAPK signaling pathway - plant	Environmental Information Processing	Signal transduction
TRINITY_DN14777_c4_g1	csl:COCSUDRAFT_37936	36.1	5.8e-11	NA	NA	NA	NA	NA	NA	NA	NA	NA
TRINITY_DN14778_c0_g2	gra:105789392	42.8	1.8e-56	-	26S proteasome non-ATPase regulatory subunit 13 homolog A	K03039	26S proteasome regulatory subunit N9	-	gra03050	Proteasome	Genetic Information Processing	Folding, sorting and degradation
TRINITY_DN14778_c0_g4	mis:MICPUN_87774	40.9	9.2e-07	-	predicted protein	K03039	26S proteasome regulatory subunit N9	-	mis03050	Proteasome	Genetic Information Processing	Folding, sorting and degradation
TRINITY_DN14781_c2_g2	cre:CHLREDRAFT_136002	51.4	1.5e-24	VPS46	subunit of the ESCRT-III complex	K12197	charged multivesicular body protein 1	-	cre04144	Endocytosis	Cellular Processes	Transport and catabolism
TRINITY_DN14784_c4_g1	bna:106399954	38	3.6e-51	NA	NA	NA	NA	NA	NA	NA	NA	NA
TRINITY_DN14785_c3_g4	soe:110775499	32.3	2.9e-13	NA	NA	NA	NA	NA	NA	NA	NA	NA
TRINITY_DN14786_c2_g1	thj:104804106	49.1	1.7e-33	NA	NA	NA	NA	NA	NA	NA	NA	NA
TRINITY_DN14786_c2_g2	mis:MICPUN_100793	52.3	9.7e-187	NA	NA	NA	NA	NA	NA	NA	NA	NA
TRINITY_DN14786_c2_g3	smo:SELMODRAFT_179250	38	2.1e-18	NA	NA	NA	NA	NA	NA	NA	NA	NA
TRINITY_DN14786_c2_g6	zma:100282854	55.3	1.2e-72	-	dehydrogenase/reductase SDR family member 2	K11147	dehydrogenase/reductase SDR family member 4	EC:1.1.-.-	zma04146	Peroxisome	Cellular Processes	Transport and catabolism
TRINITY_DN14787_c3_g4	mus:103974256	48.5	4.4e-24	NA	NA	NA	NA	NA	NA	NA	NA	NA
TRINITY_DN14791_c4_g2	csv:101219268	30.5	5.3e-06	NA	NA	NA	NA	NA	NA	NA	NA	NA
TRINITY_DN14795_c1_g4	sly:101261558	28.4	3.8e-35	NA	NA	NA	NA	NA	NA	NA	NA	NA
TRINITY_DN14798_c2_g1	cre:CHLREDRAFT_144460	33.5	2e-34	NA	NA	NA	NA	NA	NA	NA	NA	NA
TRINITY_DN14802_c1_g1	gra:105777322	38.7	1.2e-84	NA	NA	NA	NA	NA	NA	NA	NA	NA
TRINITY_DN14804_c1_g4	sbi:110437660	44.9	1.2e-31	-	ras-related protein RABF2a-like	K07889	Ras-related protein Rab-5C	-	sbi04144	Endocytosis	Cellular Processes	Transport and catabolism
TRINITY_DN14804_c1_g4	sbi:110437660	44.9	1.2e-31	-	ras-related protein RABF2a-like	K07889	Ras-related protein Rab-5C	-	sbi04145	Phagosome	Cellular Processes	Transport and catabolism
TRINITY_DN14808_c0_g4	aly:ARALYDRAFT_480986	36.9	1.3e-45	NA	NA	NA	NA	NA	NA	NA	NA	NA
TRINITY_DN14810_c0_g1	mtr:MTR_6g027580	37.3	1.1e-22	NA	NA	NA	NA	NA	NA	NA	NA	NA
TRINITY_DN14812_c5_g5	cre:CHLREDRAFT_113296	49.2	6e-97	CNX1E	molybdenum cofactor biosynthesis protein	K15376	gephyrin	EC:2.10.1.1 2.7.7.75	cre00790	Folate biosynthesis	Metabolism	Metabolism of cofactors and vitamins
TRINITY_DN14812_c5_g7	bpg:Bathy08g04250	41.2	1.9e-70	-	hypothetical protein	K03363	cell division cycle 20, cofactor of APC complex	-	bpg04120	Ubiquitin mediated proteolysis	Genetic Information Processing	Folding, sorting and degradation
TRINITY_DN14812_c5_g9	ccaj:109798978	60.9	2.2e-85	-	proteasome subunit alpha type-6-like	K02730	20S proteasome subunit alpha 1	EC:3.4.25.1	ccaj03050	Proteasome	Genetic Information Processing	Folding, sorting and degradation
TRINITY_DN14813_c0_g3	apro:F751_4082	43.9	4.8e-22	-	ATP-binding cassette sub-family G member 2	K05681	ATP-binding cassette, subfamily G (WHITE), member 2	-	apro02010	ABC transporters	Environmental Information Processing	Membrane transport
TRINITY_DN14813_c0_g4	apro:F751_4569	62.8	3.5e-35	NA	NA	NA	NA	NA	NA	NA	NA	NA
TRINITY_DN14814_c0_g1	adu:107477212	71.8	2.2e-64	NA	NA	NA	NA	NA	NA	NA	NA	NA
TRINITY_DN14814_c1_g1	han:110877168	37.9	4.3e-63	-	probable UDP-N-acetylglucosamine--peptide N-acetylglucosaminyltransferase SEC	K09667	protein O-GlcNAc transferase	EC:2.4.1.255	han00514	Other types of O-glycan biosynthesis	Metabolism	Glycan biosynthesis and metabolism
TRINITY_DN14814_c1_g2	gsl:Gasu_13570	44.9	1.5e-32	NA	NA	NA	NA	NA	NA	NA	NA	NA
TRINITY_DN14817_c1_g3	sot:102584129	24.4	6.3e-36	-	ALG-2 interacting protein X-like	K12200	programmed cell death 6-interacting protein	-	sot04144	Endocytosis	Cellular Processes	Transport and catabolism
TRINITY_DN14817_c1_g4	sly:101259647	33	8.3e-54	NA	NA	NA	NA	NA	NA	NA	NA	NA
TRINITY_DN14817_c1_g5	csl:COCSUDRAFT_20684	44.7	7.8e-68	NA	NA	NA	NA	NA	NA	NA	NA	NA
TRINITY_DN14818_c0_g1	sly:101252329	64.8	2.3e-12	-	ras-related protein RABA1f-like	K07904	Ras-related protein Rab-11A	-	sly04144	Endocytosis	Cellular Processes	Transport and catabolism
TRINITY_DN14818_c0_g3	cann:107859185	61.2	3.9e-34	-	ras-related protein RABA1c	K07904	Ras-related protein Rab-11A	-	cann04144	Endocytosis	Cellular Processes	Transport and catabolism
TRINITY_DN14818_c1_g1	mis:MICPUN_90789	47.7	3.4e-41	-	ras-related gtp-binding protein	K07901	Ras-related protein Rab-8A	-	mis04144	Endocytosis	Cellular Processes	Transport and catabolism
TRINITY_DN14821_c1_g7	ghi:107898799	39.3	9e-29	NA	NA	NA	NA	NA	NA	NA	NA	NA
TRINITY_DN14824_c1_g1	cam:101490197	34.3	1.2e-06	NA	NA	NA	NA	NA	NA	NA	NA	NA
TRINITY_DN14826_c4_g2	gsl:Gasu_30280	46.2	5.4e-29	NA	NA	NA	NA	NA	NA	NA	NA	NA
TRINITY_DN14826_c6_g1	bvg:104890070	58.8	1.6e-161	-	citrate synthase	K01647	citrate synthase	EC:2.3.3.1	bvg00020	Citrate cycle (TCA cycle)	Metabolism	Carbohydrate metabolism
TRINITY_DN14826_c6_g1	bvg:104890070	58.8	1.6e-161	-	citrate synthase	K01647	citrate synthase	EC:2.3.3.1	bvg00630	Glyoxylate and dicarboxylate metabolism	Metabolism	Carbohydrate metabolism
TRINITY_DN14828_c0_g1	eus:EUTSA_v10008031mg	42.9	6.6e-47	NA	NA	NA	NA	NA	NA	NA	NA	NA
TRINITY_DN1482_c0_g1	ccp:CHC_T00006661001	74.7	3.4e-25	-	hypothetical protein	K02885	large subunit ribosomal protein L19e	-	ccp03010	Ribosome	Genetic Information Processing	Translation
TRINITY_DN14830_c0_g3	thj:104826545	30.6	1.4e-29	NA	NA	NA	NA	NA	NA	NA	NA	NA
TRINITY_DN14835_c0_g2	ghi:107944111	34.8	9.6e-22	NA	NA	NA	NA	NA	NA	NA	NA	NA
TRINITY_DN14835_c1_g1	smo:SELMODRAFT_146060	31	5.6e-63	NA	NA	NA	NA	NA	NA	NA	NA	NA
TRINITY_DN14838_c0_g1	lang:109341944	80.8	6.7e-46	NA	NA	NA	NA	NA	NA	NA	NA	NA
TRINITY_DN14838_c0_g2	nsy:104241338	83.9	1.9e-48	NA	NA	NA	NA	NA	NA	NA	NA	NA
TRINITY_DN1483_c0_g1	egu:105048757	65.3	1.6e-47	-	60S ribosomal protein L26-2-like	K02898	large subunit ribosomal protein L26e	-	egu03010	Ribosome	Genetic Information Processing	Translation
TRINITY_DN14840_c2_g1	mus:103987470	45.6	1.1e-74	NA	NA	NA	NA	NA	NA	NA	NA	NA
TRINITY_DN14842_c3_g1	mpp:MICPUCDRAFT_25749	28.9	3.6e-06	NA	NA	NA	NA	NA	NA	NA	NA	NA
TRINITY_DN14843_c0_g2	apro:F751_3701	49.4	5.3e-166	-	Propionyl-CoA carboxylase alpha chain	K01965	propionyl-CoA carboxylase alpha chain	EC:6.4.1.3	apro00630	Glyoxylate and dicarboxylate metabolism	Metabolism	Carbohydrate metabolism
TRINITY_DN14843_c0_g2	apro:F751_3701	49.4	5.3e-166	-	Propionyl-CoA carboxylase alpha chain	K01965	propionyl-CoA carboxylase alpha chain	EC:6.4.1.3	apro00640	Propanoate metabolism	Metabolism	Carbohydrate metabolism
TRINITY_DN14843_c0_g2	apro:F751_3701	49.4	5.3e-166	-	Propionyl-CoA carboxylase alpha chain	K01965	propionyl-CoA carboxylase alpha chain	EC:6.4.1.3	apro00280	Valine, leucine and isoleucine degradation	Metabolism	Amino acid metabolism
TRINITY_DN14846_c0_g1	eus:EUTSA_v10001613mg	44.9	3.9e-38	-	hypothetical protein	K04392	Ras-related C3 botulinum toxin substrate 1	-	eus04145	Phagosome	Cellular Processes	Transport and catabolism
TRINITY_DN14846_c0_g1	eus:EUTSA_v10001613mg	44.9	3.9e-38	-	hypothetical protein	K04392	Ras-related C3 botulinum toxin substrate 1	-	eus04933	AGE-RAGE signaling pathway in diabetic complications	Human Diseases	Endocrine and metabolic diseases
TRINITY_DN14847_c1_g1	csl:COCSUDRAFT_68114	28.8	1.8e-07	-	RNA-binding domain-containing protein	K14398	cleavage and polyadenylation specificity factor subunit 6/7	-	csl03015	mRNA surveillance pathway	Genetic Information Processing	Translation
TRINITY_DN14849_c0_g7	mng:MNEG_13544	47.2	5.4e-42	NA	NA	NA	NA	NA	NA	NA	NA	NA
TRINITY_DN14851_c0_g3	fve:101302883	26.3	1.6e-57	-	phospholipase A-2-activating protein	K14018	phospholipase A-2-activating protein	-	fve04141	Protein processing in endoplasmic reticulum	Genetic Information Processing	Folding, sorting and degradation
TRINITY_DN14852_c0_g2	brp:103871402	32.5	6e-18	-	polyadenylate-binding protein 8	K13126	polyadenylate-binding protein	-	brp03013	RNA transport	Genetic Information Processing	Translation
TRINITY_DN14852_c0_g2	brp:103871402	32.5	6e-18	-	polyadenylate-binding protein 8	K13126	polyadenylate-binding protein	-	brp03015	mRNA surveillance pathway	Genetic Information Processing	Translation
TRINITY_DN14852_c0_g2	brp:103871402	32.5	6e-18	-	polyadenylate-binding protein 8	K13126	polyadenylate-binding protein	-	brp03018	RNA degradation	Genetic Information Processing	Folding, sorting and degradation
TRINITY_DN14863_c0_g1	mdm:103426352	46.1	5.6e-22	-	ras-related protein RABF1	K07889	Ras-related protein Rab-5C	-	mdm04144	Endocytosis	Cellular Processes	Transport and catabolism
TRINITY_DN14863_c0_g1	mdm:103426352	46.1	5.6e-22	-	ras-related protein RABF1	K07889	Ras-related protein Rab-5C	-	mdm04145	Phagosome	Cellular Processes	Transport and catabolism
TRINITY_DN14863_c1_g1	lang:109330310	68.9	3e-63	-	ras-related protein RHN1-like	K07889	Ras-related protein Rab-5C	-	lang04144	Endocytosis	Cellular Processes	Transport and catabolism
TRINITY_DN14863_c1_g1	lang:109330310	68.9	3e-63	-	ras-related protein RHN1-like	K07889	Ras-related protein Rab-5C	-	lang04145	Phagosome	Cellular Processes	Transport and catabolism
TRINITY_DN14864_c0_g4	cre:CHLREDRAFT_77543	71.4	6.4e-38	NA	NA	NA	NA	NA	NA	NA	NA	NA
TRINITY_DN14864_c1_g1	cre:CHLREDRAFT_108251	35.4	8.9e-35	-	predicted protein	K11839	ubiquitin carboxyl-terminal hydrolase 8	EC:3.4.19.12	cre04144	Endocytosis	Cellular Processes	Transport and catabolism
TRINITY_DN14869_c1_g1	lang:109357798	44.9	1.3e-14	-	autophagy-related protein 16-like	K17890	autophagy-related protein 16-1	-	lang04136	Autophagy - other eukaryotes	Cellular Processes	Transport and catabolism
TRINITY_DN14869_c2_g2	csv:101212780	40	4.8e-11	NA	NA	NA	NA	NA	NA	NA	NA	NA
TRINITY_DN14871_c5_g2	obr:102703241	48.5	5.2e-10	-	transcription initiation factor TFIID subunit 15	K14651	transcription initiation factor TFIID subunit 15	-	obr03022	Basal transcription factors	Genetic Information Processing	Transcription
TRINITY_DN14871_c5_g8	apro:F751_5642	36	4.1e-07	NA	NA	NA	NA	NA	NA	NA	NA	NA
TRINITY_DN14873_c0_g1	cme:CYME_CMP237C	28.1	1.8e-11	NA	NA	NA	NA	NA	NA	NA	NA	NA
TRINITY_DN14874_c1_g1	pda:103702825	52.8	1.9e-91	-	glucuronokinase 1-like	K16190	glucuronokinase	EC:2.7.1.43	pda00040	Pentose and glucuronate interconversions	Metabolism	Carbohydrate metabolism
TRINITY_DN14874_c1_g1	pda:103702825	52.8	1.9e-91	-	glucuronokinase 1-like	K16190	glucuronokinase	EC:2.7.1.43	pda00053	Ascorbate and aldarate metabolism	Metabolism	Carbohydrate metabolism
TRINITY_DN14874_c1_g1	pda:103702825	52.8	1.9e-91	-	glucuronokinase 1-like	K16190	glucuronokinase	EC:2.7.1.43	pda00520	Amino sugar and nucleotide sugar metabolism	Metabolism	Carbohydrate metabolism
TRINITY_DN14878_c2_g1	csat:104729758	46.5	1.1e-25	-	bifunctional dihydrofolate reductase-thymidylate synthase 2-like isoform X1	K13998	dihydrofolate reductase / thymidylate synthase	EC:1.5.1.3 2.1.1.45	csat00240	Pyrimidine metabolism	Metabolism	Nucleotide metabolism
TRINITY_DN14878_c2_g1	csat:104729758	46.5	1.1e-25	-	bifunctional dihydrofolate reductase-thymidylate synthase 2-like isoform X1	K13998	dihydrofolate reductase / thymidylate synthase	EC:1.5.1.3 2.1.1.45	csat00790	Folate biosynthesis	Metabolism	Metabolism of cofactors and vitamins
TRINITY_DN14878_c2_g1	csat:104729758	46.5	1.1e-25	-	bifunctional dihydrofolate reductase-thymidylate synthase 2-like isoform X1	K13998	dihydrofolate reductase / thymidylate synthase	EC:1.5.1.3 2.1.1.45	csat00670	One carbon pool by folate	Metabolism	Metabolism of cofactors and vitamins
TRINITY_DN14878_c3_g1	pxb:103937522	41.9	7.8e-59	NA	NA	NA	NA	NA	NA	NA	NA	NA
TRINITY_DN14878_c3_g2	atr:18441094	38.8	8.4e-87	NA	NA	NA	NA	NA	NA	NA	NA	NA
TRINITY_DN14878_c3_g3	csl:COCSUDRAFT_54775	57	1.6e-76	-	60S ribosomal protein L5	K02932	large subunit ribosomal protein L5e	-	csl03010	Ribosome	Genetic Information Processing	Translation
TRINITY_DN14878_c3_g5	mdm:103407786	43.5	1.3e-59	NA	NA	NA	NA	NA	NA	NA	NA	NA
TRINITY_DN14878_c3_g7	olu:OSTLU_37985	69.4	1.1e-64	NA	NA	NA	NA	NA	NA	NA	NA	NA
TRINITY_DN14879_c1_g3	mng:MNEG_7358	28.3	1.4e-32	NA	NA	NA	NA	NA	NA	NA	NA	NA
TRINITY_DN14880_c2_g1	bvg:104888022	44.2	5e-10	-	ERAD-associated E3 ubiquitin-protein ligase HRD1A	K10601	E3 ubiquitin-protein ligase synoviolin	EC:2.3.2.27	bvg04141	Protein processing in endoplasmic reticulum	Genetic Information Processing	Folding, sorting and degradation
TRINITY_DN14880_c2_g1	bvg:104888022	44.2	5e-10	-	ERAD-associated E3 ubiquitin-protein ligase HRD1A	K10601	E3 ubiquitin-protein ligase synoviolin	EC:2.3.2.27	bvg04120	Ubiquitin mediated proteolysis	Genetic Information Processing	Folding, sorting and degradation
TRINITY_DN14882_c0_g1	mcha:111019139	48.1	9.1e-61	-	U4/U6 small nuclear ribonucleoprotein Prp31 homolog isoform X1	K12844	U4/U6 small nuclear ribonucleoprotein PRP31	-	mcha03040	Spliceosome	Genetic Information Processing	Transcription
TRINITY_DN14882_c0_g10	bdi:100821958	64.9	3.9e-243	-	formate--tetrahydrofolate ligase	K01938	formate--tetrahydrofolate ligase	EC:6.3.4.3	bdi00670	One carbon pool by folate	Metabolism	Metabolism of cofactors and vitamins
TRINITY_DN14883_c0_g1	mtr:MTR_8g031660	41	1e-27	NA	NA	NA	NA	NA	NA	NA	NA	NA
TRINITY_DN14884_c0_g3	sbi:8082158	31	6e-57	NA	NA	NA	NA	NA	NA	NA	NA	NA
TRINITY_DN14884_c0_g4	soe:110784207	40.1	3e-30	-	poly [ADP-ribose] polymerase 1	K10798	poly [ADP-ribose] polymerase	EC:2.4.2.30	soe03410	Base excision repair	Genetic Information Processing	Replication and repair
TRINITY_DN14884_c0_g6	egr:104426598	41.1	1.1e-156	-	poly [ADP-ribose] polymerase 1	K10798	poly [ADP-ribose] polymerase	EC:2.4.2.30	egr03410	Base excision repair	Genetic Information Processing	Replication and repair
TRINITY_DN14890_c0_g1	fve:101308806	72.3	3.4e-294	-	probable pre-mRNA-splicing factor ATP-dependent RNA helicase	K12820	pre-mRNA-splicing factor ATP-dependent RNA helicase DHX15/PRP43	EC:3.6.4.13	fve03040	Spliceosome	Genetic Information Processing	Transcription
TRINITY_DN14891_c0_g3	dct:110093905	37.6	3.4e-39	NA	NA	NA	NA	NA	NA	NA	NA	NA
TRINITY_DN14892_c1_g2	gsl:Gasu_56640	44.3	2.4e-66	-	tyrosine aminotransferase isoform 1	K00815	tyrosine aminotransferase	EC:2.6.1.5	gsl00270	Cysteine and methionine metabolism	Metabolism	Amino acid metabolism
TRINITY_DN14892_c1_g2	gsl:Gasu_56640	44.3	2.4e-66	-	tyrosine aminotransferase isoform 1	K00815	tyrosine aminotransferase	EC:2.6.1.5	gsl00350	Tyrosine metabolism	Metabolism	Amino acid metabolism
TRINITY_DN14892_c1_g2	gsl:Gasu_56640	44.3	2.4e-66	-	tyrosine aminotransferase isoform 1	K00815	tyrosine aminotransferase	EC:2.6.1.5	gsl00360	Phenylalanine metabolism	Metabolism	Amino acid metabolism
TRINITY_DN14892_c1_g2	gsl:Gasu_56640	44.3	2.4e-66	-	tyrosine aminotransferase isoform 1	K00815	tyrosine aminotransferase	EC:2.6.1.5	gsl00400	Phenylalanine, tyrosine and tryptophan biosynthesis	Metabolism	Amino acid metabolism
TRINITY_DN14892_c1_g2	gsl:Gasu_56640	44.3	2.4e-66	-	tyrosine aminotransferase isoform 1	K00815	tyrosine aminotransferase	EC:2.6.1.5	gsl00130	Ubiquinone and other terpenoid-quinone biosynthesis	Metabolism	Metabolism of cofactors and vitamins
TRINITY_DN14892_c1_g2	gsl:Gasu_56640	44.3	2.4e-66	-	tyrosine aminotransferase isoform 1	K00815	tyrosine aminotransferase	EC:2.6.1.5	gsl00950	Isoquinoline alkaloid biosynthesis	Metabolism	Biosynthesis of other secondary metabolites
TRINITY_DN14892_c1_g2	gsl:Gasu_56640	44.3	2.4e-66	-	tyrosine aminotransferase isoform 1	K00815	tyrosine aminotransferase	EC:2.6.1.5	gsl00960	Tropane, piperidine and pyridine alkaloid biosynthesis	Metabolism	Biosynthesis of other secondary metabolites
TRINITY_DN14895_c0_g2	ath:AT5G39440	41.8	7.3e-59	NA	NA	NA	NA	NA	NA	NA	NA	NA
TRINITY_DN14895_c0_g3	cvr:CHLNCDRAFT_16802	50	7.6e-06	-	hypothetical protein	K10901	bloom syndrome protein	EC:3.6.4.12	cvr03440	Homologous recombination	Genetic Information Processing	Replication and repair
TRINITY_DN14897_c1_g2	gsl:Gasu_20540	34	6e-33	NA	NA	NA	NA	NA	NA	NA	NA	NA
TRINITY_DN14899_c1_g1	cann:107850396	62.6	7.6e-132	-	DEAD-box ATP-dependent RNA helicase 20	K12823	ATP-dependent RNA helicase DDX5/DBP2	EC:3.6.4.13	cann03040	Spliceosome	Genetic Information Processing	Transcription
TRINITY_DN14906_c0_g1	olu:OSTLU_48492	46.5	1.4e-74	NA	NA	NA	NA	NA	NA	NA	NA	NA
TRINITY_DN14907_c0_g1	ccaj:109800848	29.8	1.5e-19	NA	NA	NA	NA	NA	NA	NA	NA	NA
TRINITY_DN14911_c1_g5	obr:102713552	42.9	8.9e-63	-	putative 1-phosphatidylinositol-3-phosphate 5-kinase FAB1C	K00921	1-phosphatidylinositol-3-phosphate 5-kinase	EC:2.7.1.150	obr00562	Inositol phosphate metabolism	Metabolism	Carbohydrate metabolism
TRINITY_DN14911_c1_g5	obr:102713552	42.9	8.9e-63	-	putative 1-phosphatidylinositol-3-phosphate 5-kinase FAB1C	K00921	1-phosphatidylinositol-3-phosphate 5-kinase	EC:2.7.1.150	obr04070	Phosphatidylinositol signaling system	Environmental Information Processing	Signal transduction
TRINITY_DN14911_c1_g5	obr:102713552	42.9	8.9e-63	-	putative 1-phosphatidylinositol-3-phosphate 5-kinase FAB1C	K00921	1-phosphatidylinositol-3-phosphate 5-kinase	EC:2.7.1.150	obr04145	Phagosome	Cellular Processes	Transport and catabolism
TRINITY_DN14912_c1_g2	gsl:Gasu_04130	31.2	4.8e-16	NA	NA	NA	NA	NA	NA	NA	NA	NA
TRINITY_DN14912_c1_g3	smo:SELMODRAFT_137032	35.3	3.2e-38	NA	NA	NA	NA	NA	NA	NA	NA	NA
TRINITY_DN14912_c1_g4	cvr:CHLNCDRAFT_133695	27.3	2.3e-12	-	hypothetical protein	K20718	LRR receptor-like serine/threonine-protein kinase ERECTA	EC:2.7.11.1	cvr04016	MAPK signaling pathway - plant	Environmental Information Processing	Signal transduction
TRINITY_DN14912_c1_g5	ats:109751364	47.4	2.6e-33	NA	NA	NA	NA	NA	NA	NA	NA	NA
TRINITY_DN14913_c0_g1	gra:105804245	33.1	9.3e-77	-	acyl-coenzyme A oxidase 2	K00232	acyl-CoA oxidase	EC:1.3.3.6	gra00071	Fatty acid degradation	Metabolism	Lipid metabolism
TRINITY_DN14913_c0_g1	gra:105804245	33.1	9.3e-77	-	acyl-coenzyme A oxidase 2	K00232	acyl-CoA oxidase	EC:1.3.3.6	gra00592	alpha-Linolenic acid metabolism	Metabolism	Lipid metabolism
TRINITY_DN14913_c0_g1	gra:105804245	33.1	9.3e-77	-	acyl-coenzyme A oxidase 2	K00232	acyl-CoA oxidase	EC:1.3.3.6	gra01040	Biosynthesis of unsaturated fatty acids	Metabolism	Lipid metabolism
TRINITY_DN14913_c0_g1	gra:105804245	33.1	9.3e-77	-	acyl-coenzyme A oxidase 2	K00232	acyl-CoA oxidase	EC:1.3.3.6	gra04146	Peroxisome	Cellular Processes	Transport and catabolism
TRINITY_DN14914_c0_g1	vcn:VOLCADRAFT_33453	52.3	6.1e-46	NA	NA	NA	NA	NA	NA	NA	NA	NA
TRINITY_DN14914_c0_g3	vcn:VOLCADRAFT_33453	57.1	1.2e-07	NA	NA	NA	NA	NA	NA	NA	NA	NA
TRINITY_DN14917_c3_g3	bvg:104901177	50.2	0	-	leucine--tRNA ligase	K01869	leucyl-tRNA synthetase	EC:6.1.1.4	bvg00970	Aminoacyl-tRNA biosynthesis	Genetic Information Processing	Translation
TRINITY_DN14919_c3_g2	gsl:Gasu_42740	75.2	3e-138	-	DNA repair protein	K04482	DNA repair protein RAD51	-	gsl03440	Homologous recombination	Genetic Information Processing	Replication and repair
TRINITY_DN14919_c3_g3	ccp:CHC_T00010165001	45.1	1.7e-58	NA	NA	NA	NA	NA	NA	NA	NA	NA
TRINITY_DN14919_c3_g4	ccp:CHC_T00010165001	48.8	1.2e-54	NA	NA	NA	NA	NA	NA	NA	NA	NA
TRINITY_DN14919_c3_g5	ccp:CHC_T00010165001	47.7	2.3e-59	NA	NA	NA	NA	NA	NA	NA	NA	NA
TRINITY_DN14920_c1_g3	cme:CYME_CMR221C	36.3	1.6e-39	-	similar to dolichyl-phosphate-mannose--protein mannosyltransferase	K00728	dolichyl-phosphate-mannose-protein mannosyltransferase	EC:2.4.1.109	cme00515	Mannose type O-glycan biosyntheis	Metabolism	Glycan biosynthesis and metabolism
TRINITY_DN14920_c1_g3	cme:CYME_CMR221C	36.3	1.6e-39	-	similar to dolichyl-phosphate-mannose--protein mannosyltransferase	K00728	dolichyl-phosphate-mannose-protein mannosyltransferase	EC:2.4.1.109	cme00514	Other types of O-glycan biosynthesis	Metabolism	Glycan biosynthesis and metabolism
TRINITY_DN14922_c0_g2	mtr:MTR_8g016270	55.6	3.7e-124	NA	NA	NA	NA	NA	NA	NA	NA	NA
TRINITY_DN14923_c1_g2	csl:COCSUDRAFT_48787	36.4	1.6e-38	NA	NA	NA	NA	NA	NA	NA	NA	NA
TRINITY_DN14925_c0_g1	mis:MICPUN_100192	32.3	6.7e-105	NA	NA	NA	NA	NA	NA	NA	NA	NA
TRINITY_DN14926_c5_g2	mpp:MICPUCDRAFT_7953	42.3	9.2e-18	NA	NA	NA	NA	NA	NA	NA	NA	NA
TRINITY_DN14926_c5_g6	ini:109151381	31.8	2e-53	NA	NA	NA	NA	NA	NA	NA	NA	NA
TRINITY_DN14927_c0_g1	cre:CHLREDRAFT_174677	31.2	3.2e-09	NA	NA	NA	NA	NA	NA	NA	NA	NA
TRINITY_DN14927_c1_g1	smo:SELMODRAFT_80923	48.8	2.9e-40	NA	NA	NA	NA	NA	NA	NA	NA	NA
TRINITY_DN14928_c0_g4	bdi:100838957	42.2	3.4e-191	-	2-oxoglutarate dehydrogenase	K00164	2-oxoglutarate dehydrogenase E1 component	EC:1.2.4.2	bdi00020	Citrate cycle (TCA cycle)	Metabolism	Carbohydrate metabolism
TRINITY_DN14928_c0_g4	bdi:100838957	42.2	3.4e-191	-	2-oxoglutarate dehydrogenase	K00164	2-oxoglutarate dehydrogenase E1 component	EC:1.2.4.2	bdi00310	Lysine degradation	Metabolism	Amino acid metabolism
TRINITY_DN14928_c0_g4	bdi:100838957	42.2	3.4e-191	-	2-oxoglutarate dehydrogenase	K00164	2-oxoglutarate dehydrogenase E1 component	EC:1.2.4.2	bdi00380	Tryptophan metabolism	Metabolism	Amino acid metabolism
TRINITY_DN14930_c0_g1	vcn:VOLCADRAFT_61378	34.1	1.1e-27	NA	NA	NA	NA	NA	NA	NA	NA	NA
TRINITY_DN14932_c1_g1	smo:SELMODRAFT_126511	20.9	2.9e-08	-	hypothetical protein	K08498	syntaxin 6	-	smo04130	SNARE interactions in vesicular transport	Genetic Information Processing	Folding, sorting and degradation
TRINITY_DN14932_c1_g3	han:110865097	40.9	9.6e-23	-	riboflavin biosynthesis protein PYRR	K11752	diaminohydroxyphosphoribosylaminopyrimidine deaminase / 5-amino-6-(5-phosphoribosylamino)uracil reductase	EC:3.5.4.26 1.1.1.193	han00740	Riboflavin metabolism	Metabolism	Metabolism of cofactors and vitamins
TRINITY_DN14935_c1_g2	gsl:Gasu_49420	33.5	2e-31	NA	NA	NA	NA	NA	NA	NA	NA	NA
TRINITY_DN14939_c1_g2	zju:107414080	22.5	6.3e-21	NA	NA	NA	NA	NA	NA	NA	NA	NA
TRINITY_DN14940_c1_g3	soe:110775499	35.5	9.9e-36	NA	NA	NA	NA	NA	NA	NA	NA	NA
TRINITY_DN14945_c1_g2	smo:SELMODRAFT_439730	51.8	1.6e-50	-	hypothetical protein	K00261	glutamate dehydrogenase (NAD(P)+)	EC:1.4.1.3	smo00910	Nitrogen metabolism	Metabolism	Energy metabolism
TRINITY_DN14945_c1_g2	smo:SELMODRAFT_439730	51.8	1.6e-50	-	hypothetical protein	K00261	glutamate dehydrogenase (NAD(P)+)	EC:1.4.1.3	smo00250	Alanine, aspartate and glutamate metabolism	Metabolism	Amino acid metabolism
TRINITY_DN14945_c1_g2	smo:SELMODRAFT_439730	51.8	1.6e-50	-	hypothetical protein	K00261	glutamate dehydrogenase (NAD(P)+)	EC:1.4.1.3	smo00220	Arginine biosynthesis	Metabolism	Amino acid metabolism
TRINITY_DN14945_c1_g2	smo:SELMODRAFT_439730	51.8	1.6e-50	-	hypothetical protein	K00261	glutamate dehydrogenase (NAD(P)+)	EC:1.4.1.3	smo00471	D-Glutamine and D-glutamate metabolism	Metabolism	Metabolism of other amino acids
TRINITY_DN14947_c0_g6	gsl:Gasu_45100	36.8	1.8e-64	NA	NA	NA	NA	NA	NA	NA	NA	NA
TRINITY_DN14954_c0_g2	lang:109349945	37.8	4e-54	-	serine/threonine-protein phosphatase PP1	K06269	serine/threonine-protein phosphatase PP1 catalytic subunit	EC:3.1.3.16	lang03015	mRNA surveillance pathway	Genetic Information Processing	Translation
TRINITY_DN14954_c0_g8	gmx:100815231	30.9	3.7e-28	NA	NA	NA	NA	NA	NA	NA	NA	NA
TRINITY_DN14955_c1_g1	hbr:110649607	28.1	2.6e-38	NA	NA	NA	NA	NA	NA	NA	NA	NA
TRINITY_DN14955_c1_g2	mis:MICPUN_107365	40.8	2.1e-06	NA	NA	NA	NA	NA	NA	NA	NA	NA
TRINITY_DN14957_c2_g4	csv:101219308	40	5.4e-28	-	protein tipD	K17890	autophagy-related protein 16-1	-	csv04136	Autophagy - other eukaryotes	Cellular Processes	Transport and catabolism
TRINITY_DN14958_c1_g1	sind:105172753	34.5	6.4e-102	-	replication protein A 70 kDa DNA-binding subunit A	K07466	replication factor A1	-	sind03030	DNA replication	Genetic Information Processing	Replication and repair
TRINITY_DN14958_c1_g1	sind:105172753	34.5	6.4e-102	-	replication protein A 70 kDa DNA-binding subunit A	K07466	replication factor A1	-	sind03420	Nucleotide excision repair	Genetic Information Processing	Replication and repair
TRINITY_DN14958_c1_g1	sind:105172753	34.5	6.4e-102	-	replication protein A 70 kDa DNA-binding subunit A	K07466	replication factor A1	-	sind03430	Mismatch repair	Genetic Information Processing	Replication and repair
TRINITY_DN14958_c1_g1	sind:105172753	34.5	6.4e-102	-	replication protein A 70 kDa DNA-binding subunit A	K07466	replication factor A1	-	sind03440	Homologous recombination	Genetic Information Processing	Replication and repair
TRINITY_DN14962_c0_g2	fve:101306151	38	6.9e-06	-	cell division control protein 48 homolog C	K14571	ribosome biogenesis ATPase	-	fve03008	Ribosome biogenesis in eukaryotes	Genetic Information Processing	Translation
TRINITY_DN14962_c0_g3	cann:107862272	39.6	5.5e-35	NA	NA	NA	NA	NA	NA	NA	NA	NA
TRINITY_DN14963_c2_g1	cme:CYME_CML061C	28.1	1.4e-87	NA	NA	NA	NA	NA	NA	NA	NA	NA
TRINITY_DN14963_c2_g2	vcn:VOLCADRAFT_107955	49.4	1.2e-37	NA	NA	NA	NA	NA	NA	NA	NA	NA
TRINITY_DN14966_c5_g3	mpp:MICPUCDRAFT_21861	55.2	2.8e-19	NA	NA	NA	NA	NA	NA	NA	NA	NA
TRINITY_DN14967_c1_g1	rcu:8265663	49.2	9.2e-12	NA	NA	NA	NA	NA	NA	NA	NA	NA
TRINITY_DN14968_c1_g2	sita:101759799	25.9	3.5e-06	-	R3H domain-containing protein 1	K02865	large subunit ribosomal protein L10Ae	-	sita03010	Ribosome	Genetic Information Processing	Translation
TRINITY_DN14971_c0_g2	soe:110791261	42	1.3e-27	-	phosphatidylinositol-3-phosphatase myotubularin-1	K18081	myotubularin-related protein 1/2	EC:3.1.3.64 3.1.3.95	soe00562	Inositol phosphate metabolism	Metabolism	Carbohydrate metabolism
TRINITY_DN14971_c0_g2	soe:110791261	42	1.3e-27	-	phosphatidylinositol-3-phosphatase myotubularin-1	K18081	myotubularin-related protein 1/2	EC:3.1.3.64 3.1.3.95	soe04070	Phosphatidylinositol signaling system	Environmental Information Processing	Signal transduction
TRINITY_DN14975_c1_g1	ini:109152922	28.6	2.2e-07	NA	NA	NA	NA	NA	NA	NA	NA	NA
TRINITY_DN14975_c1_g2	mcha:111005219	38.2	1.1e-91	-	protein RRC1 isoform X1	K12842	U2-associated protein SR140	-	mcha03040	Spliceosome	Genetic Information Processing	Transcription
TRINITY_DN14976_c3_g2	osa:4330486	36	3.7e-47	NA	NA	NA	NA	NA	NA	NA	NA	NA
TRINITY_DN14976_c4_g1	pxb:103958547	33.2	8.7e-12	NA	NA	NA	NA	NA	NA	NA	NA	NA
TRINITY_DN14979_c0_g1	bdi:100839066	29.2	1.9e-36	-	protein HOTHEAD	K00108	choline dehydrogenase	EC:1.1.99.1	bdi00260	Glycine, serine and threonine metabolism	Metabolism	Amino acid metabolism
TRINITY_DN14979_c1_g1	gmx:100783104	24.1	9e-14	-	4-coumarate--CoA ligase-like 5	K10526	OPC-8:0 CoA ligase 1	EC:6.2.1.-	gmx00592	alpha-Linolenic acid metabolism	Metabolism	Lipid metabolism
TRINITY_DN14984_c1_g2	smo:SELMODRAFT_100761	36.2	1.4e-29	ARPC2-2	hypothetical protein	K05758	actin related protein 2/3 complex, subunit 2	-	smo04144	Endocytosis	Cellular Processes	Transport and catabolism
TRINITY_DN14984_c2_g1	gsl:Gasu_59920	39.1	7.8e-99	NA	NA	NA	NA	NA	NA	NA	NA	NA
TRINITY_DN14984_c2_g5	lang:109341961	57.1	2.2e-12	NA	NA	NA	NA	NA	NA	NA	NA	NA
TRINITY_DN14985_c2_g1	nta:107801043	24.1	9.9e-08	-	protein disulfide-isomerase-like	K09580	protein disulfide-isomerase A1	EC:5.3.4.1	nta04141	Protein processing in endoplasmic reticulum	Genetic Information Processing	Folding, sorting and degradation
TRINITY_DN14985_c2_g6	vcn:VOLCADRAFT_88920	29.6	3.3e-19	NA	NA	NA	NA	NA	NA	NA	NA	NA
TRINITY_DN14986_c1_g3	pxb:103942604	39.6	3.6e-106	NA	NA	NA	NA	NA	NA	NA	NA	NA
TRINITY_DN14988_c1_g2	ota:OT_ostta12g01250	34.7	5.3e-19	-	Armadillo repeat-containing protein 3 and Serine/threonine-protein kinase CTR1	K14510	serine/threonine-protein kinase CTR1	EC:2.7.11.1	ota04016	MAPK signaling pathway - plant	Environmental Information Processing	Signal transduction
TRINITY_DN14988_c1_g2	ota:OT_ostta12g01250	34.7	5.3e-19	-	Armadillo repeat-containing protein 3 and Serine/threonine-protein kinase CTR1	K14510	serine/threonine-protein kinase CTR1	EC:2.7.11.1	ota04075	Plant hormone signal transduction	Environmental Information Processing	Signal transduction
TRINITY_DN14990_c2_g10	csl:COCSUDRAFT_64616	41.2	1.3e-12	NA	NA	NA	NA	NA	NA	NA	NA	NA
TRINITY_DN14990_c2_g2	ccp:CHC_T00006817001	54.7	4.4e-35	-	hypothetical protein	K03635	molybdopterin synthase catalytic subunit	EC:2.8.1.12	ccp00790	Folate biosynthesis	Metabolism	Metabolism of cofactors and vitamins
TRINITY_DN14990_c2_g2	ccp:CHC_T00006817001	54.7	4.4e-35	-	hypothetical protein	K03635	molybdopterin synthase catalytic subunit	EC:2.8.1.12	ccp04122	Sulfur relay system	Genetic Information Processing	Folding, sorting and degradation
TRINITY_DN14990_c2_g3	mpp:MICPUCDRAFT_28137	38.6	3.9e-124	-	hypothetical protein	K15013	long-chain-fatty-acid--CoA ligase ACSBG	EC:6.2.1.3	mpp00061	Fatty acid biosynthesis	Metabolism	Lipid metabolism
TRINITY_DN14990_c2_g3	mpp:MICPUCDRAFT_28137	38.6	3.9e-124	-	hypothetical protein	K15013	long-chain-fatty-acid--CoA ligase ACSBG	EC:6.2.1.3	mpp00071	Fatty acid degradation	Metabolism	Lipid metabolism
TRINITY_DN14991_c0_g1	zju:107423825	33	5.6e-113	NA	NA	NA	NA	NA	NA	NA	NA	NA
TRINITY_DN14991_c0_g6	sind:105179865	57.2	5.2e-65	-	uridine kinase-like protein 5	K00876	uridine kinase	EC:2.7.1.48	sind00240	Pyrimidine metabolism	Metabolism	Nucleotide metabolism
TRINITY_DN14994_c3_g10	apro:F751_4075	46.8	5.7e-18	-	Pyridoxal biosynthesis protein PDX2	K08681	5'-phosphate synthase pdxT subunit	EC:4.3.3.6	apro00750	Vitamin B6 metabolism	Metabolism	Metabolism of cofactors and vitamins
TRINITY_DN14994_c3_g6	sind:105170308	37.5	1.4e-15	-	probable pyridoxal 5'-phosphate synthase subunit PDX2	K08681	5'-phosphate synthase pdxT subunit	EC:4.3.3.6	sind00750	Vitamin B6 metabolism	Metabolism	Metabolism of cofactors and vitamins
TRINITY_DN14996_c0_g1	cvr:CHLNCDRAFT_144377	32.4	3.7e-45	NA	NA	NA	NA	NA	NA	NA	NA	NA
TRINITY_DN15000_c2_g3	smo:SELMODRAFT_169971	70.5	1.8e-10	NA	NA	NA	NA	NA	NA	NA	NA	NA
TRINITY_DN15005_c1_g4	tcc:18611652	40.8	3.2e-46	-	gamma-glutamyltranspeptidase 1	K18592	gamma-glutamyltranspeptidase / glutathione hydrolase / leukotriene-C4 hydrolase	EC:2.3.2.2 3.4.19.13 3.4.19.14	tcc00590	Arachidonic acid metabolism	Metabolism	Lipid metabolism
TRINITY_DN15005_c1_g4	tcc:18611652	40.8	3.2e-46	-	gamma-glutamyltranspeptidase 1	K18592	gamma-glutamyltranspeptidase / glutathione hydrolase / leukotriene-C4 hydrolase	EC:2.3.2.2 3.4.19.13 3.4.19.14	tcc00430	Taurine and hypotaurine metabolism	Metabolism	Metabolism of other amino acids
TRINITY_DN15005_c1_g4	tcc:18611652	40.8	3.2e-46	-	gamma-glutamyltranspeptidase 1	K18592	gamma-glutamyltranspeptidase / glutathione hydrolase / leukotriene-C4 hydrolase	EC:2.3.2.2 3.4.19.13 3.4.19.14	tcc00460	Cyanoamino acid metabolism	Metabolism	Metabolism of other amino acids
TRINITY_DN15005_c1_g4	tcc:18611652	40.8	3.2e-46	-	gamma-glutamyltranspeptidase 1	K18592	gamma-glutamyltranspeptidase / glutathione hydrolase / leukotriene-C4 hydrolase	EC:2.3.2.2 3.4.19.13 3.4.19.14	tcc00480	Glutathione metabolism	Metabolism	Metabolism of other amino acids
TRINITY_DN15005_c1_g7	mcha:111020748	43.9	4.4e-64	NA	NA	NA	NA	NA	NA	NA	NA	NA
TRINITY_DN15008_c2_g1	obr:102709407	36.5	6.1e-35	NA	NA	NA	NA	NA	NA	NA	NA	NA
TRINITY_DN15014_c0_g1	dct:110099696	69.4	7.7e-16	-	uncharacterized protein LOC110099696	K02948	small subunit ribosomal protein S11	-	dct03010	Ribosome	Genetic Information Processing	Translation
TRINITY_DN15016_c1_g2	nnu:104607792	60.2	5.1e-67	-	U5 small nuclear ribonucleoprotein 40 kDa protein	K12857	Prp8 binding protein	-	nnu03040	Spliceosome	Genetic Information Processing	Transcription
TRINITY_DN15016_c1_g5	csl:COCSUDRAFT_54894	52.1	1.9e-97	-	aldehyde dehydrogenase	K00128	aldehyde dehydrogenase (NAD+)	EC:1.2.1.3	csl00010	Glycolysis / Gluconeogenesis	Metabolism	Carbohydrate metabolism
TRINITY_DN15016_c1_g5	csl:COCSUDRAFT_54894	52.1	1.9e-97	-	aldehyde dehydrogenase	K00128	aldehyde dehydrogenase (NAD+)	EC:1.2.1.3	csl00053	Ascorbate and aldarate metabolism	Metabolism	Carbohydrate metabolism
TRINITY_DN15016_c1_g5	csl:COCSUDRAFT_54894	52.1	1.9e-97	-	aldehyde dehydrogenase	K00128	aldehyde dehydrogenase (NAD+)	EC:1.2.1.3	csl00620	Pyruvate metabolism	Metabolism	Carbohydrate metabolism
TRINITY_DN15016_c1_g5	csl:COCSUDRAFT_54894	52.1	1.9e-97	-	aldehyde dehydrogenase	K00128	aldehyde dehydrogenase (NAD+)	EC:1.2.1.3	csl00071	Fatty acid degradation	Metabolism	Lipid metabolism
TRINITY_DN15016_c1_g5	csl:COCSUDRAFT_54894	52.1	1.9e-97	-	aldehyde dehydrogenase	K00128	aldehyde dehydrogenase (NAD+)	EC:1.2.1.3	csl00561	Glycerolipid metabolism	Metabolism	Lipid metabolism
TRINITY_DN15016_c1_g5	csl:COCSUDRAFT_54894	52.1	1.9e-97	-	aldehyde dehydrogenase	K00128	aldehyde dehydrogenase (NAD+)	EC:1.2.1.3	csl00280	Valine, leucine and isoleucine degradation	Metabolism	Amino acid metabolism
TRINITY_DN15016_c1_g5	csl:COCSUDRAFT_54894	52.1	1.9e-97	-	aldehyde dehydrogenase	K00128	aldehyde dehydrogenase (NAD+)	EC:1.2.1.3	csl00310	Lysine degradation	Metabolism	Amino acid metabolism
TRINITY_DN15016_c1_g5	csl:COCSUDRAFT_54894	52.1	1.9e-97	-	aldehyde dehydrogenase	K00128	aldehyde dehydrogenase (NAD+)	EC:1.2.1.3	csl00330	Arginine and proline metabolism	Metabolism	Amino acid metabolism
TRINITY_DN15016_c1_g5	csl:COCSUDRAFT_54894	52.1	1.9e-97	-	aldehyde dehydrogenase	K00128	aldehyde dehydrogenase (NAD+)	EC:1.2.1.3	csl00340	Histidine metabolism	Metabolism	Amino acid metabolism
TRINITY_DN15016_c1_g5	csl:COCSUDRAFT_54894	52.1	1.9e-97	-	aldehyde dehydrogenase	K00128	aldehyde dehydrogenase (NAD+)	EC:1.2.1.3	csl00380	Tryptophan metabolism	Metabolism	Amino acid metabolism
TRINITY_DN15016_c1_g5	csl:COCSUDRAFT_54894	52.1	1.9e-97	-	aldehyde dehydrogenase	K00128	aldehyde dehydrogenase (NAD+)	EC:1.2.1.3	csl00410	beta-Alanine metabolism	Metabolism	Metabolism of other amino acids
TRINITY_DN15016_c1_g5	csl:COCSUDRAFT_54894	52.1	1.9e-97	-	aldehyde dehydrogenase	K00128	aldehyde dehydrogenase (NAD+)	EC:1.2.1.3	csl00903	Limonene and pinene degradation	Metabolism	Metabolism of terpenoids and polyketides
TRINITY_DN15017_c0_g2	ath:AT4G21130	40.5	2.5e-08	NA	NA	NA	NA	NA	NA	NA	NA	NA
TRINITY_DN15020_c1_g2	ccp:CHC_T00010165001	32.9	5.6e-17	NA	NA	NA	NA	NA	NA	NA	NA	NA
TRINITY_DN15020_c1_g3	mis:MICPUN_79584	40.4	7.7e-39	-	predicted protein	K17908	autophagy-related protein 18	-	mis04136	Autophagy - other eukaryotes	Cellular Processes	Transport and catabolism
TRINITY_DN15021_c0_g1	mng:MNEG_5586	41.3	7e-09	NA	NA	NA	NA	NA	NA	NA	NA	NA
TRINITY_DN15023_c0_g3	pavi:110774530	31.7	4.7e-54	NA	NA	NA	NA	NA	NA	NA	NA	NA
TRINITY_DN15028_c0_g4	han:110886368	47.6	3.1e-65	-	mitogen-activated protein kinase kinase kinase NPK1-like	K20606	mitogen-activated protein kinase kinase kinase ANP1	EC:2.7.11.25	han04016	MAPK signaling pathway - plant	Environmental Information Processing	Signal transduction
TRINITY_DN15029_c1_g9	ats:109786350	51.6	3.2e-34	NA	NA	NA	NA	NA	NA	NA	NA	NA
TRINITY_DN15030_c2_g2	ota:OT_ostta01g04270	52.4	2.1e-54	NA	NA	NA	NA	NA	NA	NA	NA	NA
TRINITY_DN15030_c2_g3	aly:ARALYDRAFT_485596	34.8	7.2e-14	-	hypothetical protein	K02138	F-type H+-transporting ATPase subunit d	-	aly00190	Oxidative phosphorylation	Metabolism	Energy metabolism
TRINITY_DN15030_c3_g1	csat:104707672	40.5	7.7e-37	-	vacuolar protein sorting-associated protein 28 homolog 2-like	K12184	ESCRT-I complex subunit VPS28	-	csat04144	Endocytosis	Cellular Processes	Transport and catabolism
TRINITY_DN15030_c3_g2	csat:104727136	40.6	5.2e-18	NA	NA	NA	NA	NA	NA	NA	NA	NA
TRINITY_DN15030_c3_g4	obr:102712024	47.7	2.5e-42	-	AMSH-like ubiquitin thioesterase 3	K11866	STAM-binding protein	EC:3.4.19.12	obr04144	Endocytosis	Cellular Processes	Transport and catabolism
TRINITY_DN15031_c3_g1	aip:110266878	75.5	7.5e-15	-	uncharacterized protein LOC110266878	K02108	F-type H+-transporting ATPase subunit a	-	aip00190	Oxidative phosphorylation	Metabolism	Energy metabolism
TRINITY_DN15031_c3_g1	aip:110266878	75.5	7.5e-15	-	uncharacterized protein LOC110266878	K02108	F-type H+-transporting ATPase subunit a	-	aip00195	Photosynthesis	Metabolism	Energy metabolism
TRINITY_DN15033_c2_g1	gsl:Gasu_14950	25.1	1e-17	-	hypothetical protein isoform 1	K10608	tripartite motif-containing protein 37	EC:2.3.2.27	gsl04120	Ubiquitin mediated proteolysis	Genetic Information Processing	Folding, sorting and degradation
TRINITY_DN15035_c1_g1	osa:9271389	41.7	2.7e-09	-	ADP-ribosylation factor GTPase-activating protein AGD12	K12486	stromal membrane-associated protein	-	osa04144	Endocytosis	Cellular Processes	Transport and catabolism
TRINITY_DN15035_c1_g7	osa:9271389	39.6	2e-09	-	ADP-ribosylation factor GTPase-activating protein AGD12	K12486	stromal membrane-associated protein	-	osa04144	Endocytosis	Cellular Processes	Transport and catabolism
TRINITY_DN15039_c1_g8	csl:COCSUDRAFT_54657	48.7	9e-85	-	NAD(P) dependent steroid dehydrogenase-like protein	K07748	sterol-4alpha-carboxylate 3-dehydrogenase (decarboxylating)	EC:1.1.1.170	csl00100	Steroid biosynthesis	Metabolism	Lipid metabolism
TRINITY_DN15041_c1_g2	mis:MICPUN_102575	32.7	2e-06	NA	NA	NA	NA	NA	NA	NA	NA	NA
TRINITY_DN15041_c1_g4	dct:110098611	37.6	3.5e-54	NA	NA	NA	NA	NA	NA	NA	NA	NA
TRINITY_DN15042_c0_g2	cre:CHLREDRAFT_1807	34.2	3.5e-16	NA	NA	NA	NA	NA	NA	NA	NA	NA
TRINITY_DN15044_c0_g1	pda:103719196	33.9	1.7e-07	NA	NA	NA	NA	NA	NA	NA	NA	NA
TRINITY_DN15044_c0_g4	sind:105164146	45.2	9.7e-216	NA	NA	NA	NA	NA	NA	NA	NA	NA
TRINITY_DN15044_c0_g5	csl:COCSUDRAFT_67911	46.5	4.9e-85	NA	NA	NA	NA	NA	NA	NA	NA	NA
TRINITY_DN15045_c3_g1	smo:SELMODRAFT_139753	29.6	1.6e-14	NA	NA	NA	NA	NA	NA	NA	NA	NA
TRINITY_DN15045_c3_g4	cme:CYME_CMO258C	25.9	4.2e-09	NA	NA	NA	NA	NA	NA	NA	NA	NA
TRINITY_DN15048_c3_g2	cme:CYME_CMR193C	41.6	6.6e-63	NA	NA	NA	NA	NA	NA	NA	NA	NA
TRINITY_DN15050_c3_g1	mus:103994044	55.9	7.3e-229	-	threonine--tRNA ligase	K01868	threonyl-tRNA synthetase	EC:6.1.1.3	mus00970	Aminoacyl-tRNA biosynthesis	Genetic Information Processing	Translation
TRINITY_DN15050_c3_g2	hbr:110669381	42.1	4.2e-75	NA	NA	NA	NA	NA	NA	NA	NA	NA
TRINITY_DN15051_c3_g3	gra:105777997	53.3	1.3e-11	NA	NA	NA	NA	NA	NA	NA	NA	NA
TRINITY_DN15053_c2_g1	mis:MICPUN_101616	51.1	6.6e-89	-	predicted protein	K14512	mitogen-activated protein kinase 6	EC:2.7.11.24	mis04016	MAPK signaling pathway - plant	Environmental Information Processing	Signal transduction
TRINITY_DN15053_c2_g1	mis:MICPUN_101616	51.1	6.6e-89	-	predicted protein	K14512	mitogen-activated protein kinase 6	EC:2.7.11.24	mis04075	Plant hormone signal transduction	Environmental Information Processing	Signal transduction
TRINITY_DN15054_c0_g3	cit:102607307	32.4	1.3e-21	-	probable serine/threonine-protein kinase PBL7	K13430	serine/threonine-protein kinase PBS1	EC:2.7.11.1	cit04626	Plant-pathogen interaction	Organismal Systems	Environmental adaptation
TRINITY_DN15055_c1_g2	mdm:103444978	30.9	1.6e-26	NA	NA	NA	NA	NA	NA	NA	NA	NA
TRINITY_DN15055_c1_g5	cit:102610073	41.2	2.9e-06	NA	NA	NA	NA	NA	NA	NA	NA	NA
TRINITY_DN15055_c2_g1	nnu:104608324	25.1	1.8e-23	NA	NA	NA	NA	NA	NA	NA	NA	NA
TRINITY_DN15060_c0_g1	soe:110799002	34.9	3.5e-10	NA	NA	NA	NA	NA	NA	NA	NA	NA
TRINITY_DN15060_c0_g3	ccp:CHC_T00002352001	35.6	1.6e-25	NA	NA	NA	NA	NA	NA	NA	NA	NA
TRINITY_DN15061_c0_g4	cre:CHLREDRAFT_99147	65.8	3.4e-37	NA	NA	NA	NA	NA	NA	NA	NA	NA
TRINITY_DN15066_c1_g3	cme:CYME_CMT371C	37.9	2.3e-14	NA	NA	NA	NA	NA	NA	NA	NA	NA
TRINITY_DN15066_c1_g7	osa:4329527	29.7	2.8e-12	-	serine/threonine-protein kinase CTR1 isoform X1	K14510	serine/threonine-protein kinase CTR1	EC:2.7.11.1	osa04016	MAPK signaling pathway - plant	Environmental Information Processing	Signal transduction
TRINITY_DN15066_c1_g7	osa:4329527	29.7	2.8e-12	-	serine/threonine-protein kinase CTR1 isoform X1	K14510	serine/threonine-protein kinase CTR1	EC:2.7.11.1	osa04075	Plant hormone signal transduction	Environmental Information Processing	Signal transduction
TRINITY_DN15066_c1_g9	atr:18441414	31.2	4.4e-23	-	serine/threonine-protein kinase CTR1 isoform X1	K14510	serine/threonine-protein kinase CTR1	EC:2.7.11.1	atr04016	MAPK signaling pathway - plant	Environmental Information Processing	Signal transduction
TRINITY_DN15066_c1_g9	atr:18441414	31.2	4.4e-23	-	serine/threonine-protein kinase CTR1 isoform X1	K14510	serine/threonine-protein kinase CTR1	EC:2.7.11.1	atr04075	Plant hormone signal transduction	Environmental Information Processing	Signal transduction
TRINITY_DN15069_c0_g1	pvu:PHAVU_002G036200g	55.2	1.3e-20	NA	NA	NA	NA	NA	NA	NA	NA	NA
TRINITY_DN15069_c1_g1	osa:4346475	30.8	2.6e-52	NA	NA	NA	NA	NA	NA	NA	NA	NA
TRINITY_DN15073_c2_g1	dct:110105640	36.2	8.5e-20	NA	NA	NA	NA	NA	NA	NA	NA	NA
TRINITY_DN15073_c3_g7	nnu:104613256	62.2	5.9e-60	NA	NA	NA	NA	NA	NA	NA	NA	NA
TRINITY_DN15075_c0_g1	sot:102606334	41.1	5.7e-133	-	eukaryotic translation initiation factor 3 subunit B	K03253	translation initiation factor 3 subunit B	-	sot03013	RNA transport	Genetic Information Processing	Translation
TRINITY_DN15077_c3_g6	cmo:103497742	33.9	1.2e-16	-	ARF guanine-nucleotide exchange factor GNL2	K18443	golgi-specific brefeldin A-resistance guanine nucleotide exchange factor 1	-	cmo04144	Endocytosis	Cellular Processes	Transport and catabolism
TRINITY_DN15079_c4_g3	thj:104821697	69.8	3.6e-43	-	probable nucleolar protein 5-2	K14565	nucleolar protein 58	-	thj03008	Ribosome biogenesis in eukaryotes	Genetic Information Processing	Translation
TRINITY_DN15079_c4_g7	atr:18429454	62.8	2e-87	-	probable nucleolar protein 5-2	K14565	nucleolar protein 58	-	atr03008	Ribosome biogenesis in eukaryotes	Genetic Information Processing	Translation
TRINITY_DN15081_c0_g1	osa:4343750	38.2	5.7e-64	-	SUMO-activating enzyme subunit 2 isoform X1	K10685	ubiquitin-like 1-activating enzyme E1 B	EC:6.2.1.45	osa04120	Ubiquitin mediated proteolysis	Genetic Information Processing	Folding, sorting and degradation
TRINITY_DN15082_c0_g3	csl:COCSUDRAFT_35050	44.7	1.3e-06	NA	NA	NA	NA	NA	NA	NA	NA	NA
TRINITY_DN15084_c1_g7	cit:102610503	33.3	6.1e-07	NA	NA	NA	NA	NA	NA	NA	NA	NA
TRINITY_DN15087_c0_g1	gmx:100818300	39.4	6.8e-09	-	glycine-rich RNA-binding protein 4	K12741	heterogeneous nuclear ribonucleoprotein A1/A3	-	gmx03040	Spliceosome	Genetic Information Processing	Transcription
TRINITY_DN15095_c1_g7	tcc:18598062	64.5	4.8e-77	-	splicing factor 3A subunit 2	K12826	splicing factor 3A subunit 2	-	tcc03040	Spliceosome	Genetic Information Processing	Transcription
TRINITY_DN15095_c1_g8	csl:COCSUDRAFT_65132	36.8	3.3e-51	NA	NA	NA	NA	NA	NA	NA	NA	NA
TRINITY_DN15097_c0_g1	csl:COCSUDRAFT_31379	36.8	2.2e-63	NA	NA	NA	NA	NA	NA	NA	NA	NA
TRINITY_DN15098_c0_g1	ini:109182597	35.7	1.5e-06	-	dihydrolipoyllysine-residue succinyltransferase component of 2-oxoglutarate dehydrogenase complex 1	K00658	2-oxoglutarate dehydrogenase E2 component (dihydrolipoamide succinyltransferase)	EC:2.3.1.61	ini00020	Citrate cycle (TCA cycle)	Metabolism	Carbohydrate metabolism
TRINITY_DN15098_c0_g1	ini:109182597	35.7	1.5e-06	-	dihydrolipoyllysine-residue succinyltransferase component of 2-oxoglutarate dehydrogenase complex 1	K00658	2-oxoglutarate dehydrogenase E2 component (dihydrolipoamide succinyltransferase)	EC:2.3.1.61	ini00310	Lysine degradation	Metabolism	Amino acid metabolism
TRINITY_DN15099_c0_g2	obr:102700578	44.9	1.9e-47	-	ectonucleotide pyrophosphatase/phosphodiesterase family member 3-like	K01513	ectonucleotide pyrophosphatase/phosphodiesterase family member 1/3	EC:3.1.4.1 3.6.1.9	obr00500	Starch and sucrose metabolism	Metabolism	Carbohydrate metabolism
TRINITY_DN15099_c0_g2	obr:102700578	44.9	1.9e-47	-	ectonucleotide pyrophosphatase/phosphodiesterase family member 3-like	K01513	ectonucleotide pyrophosphatase/phosphodiesterase family member 1/3	EC:3.1.4.1 3.6.1.9	obr00230	Purine metabolism	Metabolism	Nucleotide metabolism
TRINITY_DN15099_c0_g2	obr:102700578	44.9	1.9e-47	-	ectonucleotide pyrophosphatase/phosphodiesterase family member 3-like	K01513	ectonucleotide pyrophosphatase/phosphodiesterase family member 1/3	EC:3.1.4.1 3.6.1.9	obr00240	Pyrimidine metabolism	Metabolism	Nucleotide metabolism
TRINITY_DN15099_c0_g2	obr:102700578	44.9	1.9e-47	-	ectonucleotide pyrophosphatase/phosphodiesterase family member 3-like	K01513	ectonucleotide pyrophosphatase/phosphodiesterase family member 1/3	EC:3.1.4.1 3.6.1.9	obr00740	Riboflavin metabolism	Metabolism	Metabolism of cofactors and vitamins
TRINITY_DN15099_c0_g2	obr:102700578	44.9	1.9e-47	-	ectonucleotide pyrophosphatase/phosphodiesterase family member 3-like	K01513	ectonucleotide pyrophosphatase/phosphodiesterase family member 1/3	EC:3.1.4.1 3.6.1.9	obr00760	Nicotinate and nicotinamide metabolism	Metabolism	Metabolism of cofactors and vitamins
TRINITY_DN15099_c0_g2	obr:102700578	44.9	1.9e-47	-	ectonucleotide pyrophosphatase/phosphodiesterase family member 3-like	K01513	ectonucleotide pyrophosphatase/phosphodiesterase family member 1/3	EC:3.1.4.1 3.6.1.9	obr00770	Pantothenate and CoA biosynthesis	Metabolism	Metabolism of cofactors and vitamins
TRINITY_DN15102_c1_g1	pxb:103942743	45.1	8.7e-81	NA	NA	NA	NA	NA	NA	NA	NA	NA
TRINITY_DN15102_c1_g5	atr:18442431	70.4	1.3e-68	NA	NA	NA	NA	NA	NA	NA	NA	NA
TRINITY_DN15103_c0_g1	mpp:MICPUCDRAFT_3609	30.2	3.9e-43	NA	NA	NA	NA	NA	NA	NA	NA	NA
TRINITY_DN15104_c0_g3	ath:AT2G01650	27.7	1.2e-12	PUX2	plant UBX domain-containing protein 2	K14011	UBX domain-containing protein 6	-	ath04141	Protein processing in endoplasmic reticulum	Genetic Information Processing	Folding, sorting and degradation
TRINITY_DN15105_c1_g4	adu:107480749	41.1	4.4e-21	-	rac-like GTP-binding protein RAC13	K04392	Ras-related C3 botulinum toxin substrate 1	-	adu04145	Phagosome	Cellular Processes	Transport and catabolism
TRINITY_DN15105_c1_g4	adu:107480749	41.1	4.4e-21	-	rac-like GTP-binding protein RAC13	K04392	Ras-related C3 botulinum toxin substrate 1	-	adu04933	AGE-RAGE signaling pathway in diabetic complications	Human Diseases	Endocrine and metabolic diseases
TRINITY_DN15106_c2_g3	mdm:103405390	39.7	6.7e-38	NA	NA	NA	NA	NA	NA	NA	NA	NA
TRINITY_DN15106_c2_g4	thj:104808728	64.3	8.1e-65	-	inosine triphosphate pyrophosphatase	K01519	inosine triphosphate pyrophosphatase	EC:3.6.1.-	thj00230	Purine metabolism	Metabolism	Nucleotide metabolism
TRINITY_DN15109_c4_g3	ini:109150600	35.3	1.9e-54	NA	NA	NA	NA	NA	NA	NA	NA	NA
TRINITY_DN15110_c3_g1	nnu:104604269	53	4.6e-13	-	SKP1-like protein 1B	K03094	S-phase kinase-associated protein 1	-	nnu04141	Protein processing in endoplasmic reticulum	Genetic Information Processing	Folding, sorting and degradation
TRINITY_DN15110_c3_g1	nnu:104604269	53	4.6e-13	-	SKP1-like protein 1B	K03094	S-phase kinase-associated protein 1	-	nnu04120	Ubiquitin mediated proteolysis	Genetic Information Processing	Folding, sorting and degradation
TRINITY_DN15110_c3_g4	thj:104808788	47.1	1e-07	-	SKP1-like protein 14	K03094	S-phase kinase-associated protein 1	-	thj04141	Protein processing in endoplasmic reticulum	Genetic Information Processing	Folding, sorting and degradation
TRINITY_DN15110_c3_g4	thj:104808788	47.1	1e-07	-	SKP1-like protein 14	K03094	S-phase kinase-associated protein 1	-	thj04120	Ubiquitin mediated proteolysis	Genetic Information Processing	Folding, sorting and degradation
TRINITY_DN15113_c0_g4	ghi:107929219	25.8	1.4e-24	-	O-glucosyltransferase rumi homolog	K13667	protein glucosyltransferase	EC:2.4.1.-	ghi00514	Other types of O-glycan biosynthesis	Metabolism	Glycan biosynthesis and metabolism
TRINITY_DN15114_c0_g1	cvr:CHLNCDRAFT_31601	65.1	3.5e-18	-	hypothetical protein	K03946	NADH dehydrogenase (ubiquinone) 1 alpha subcomplex subunit 2	-	cvr00190	Oxidative phosphorylation	Metabolism	Energy metabolism
TRINITY_DN15114_c1_g2	lja:Lj3g3v0339040.1	48.1	1.6e-74	NA	NA	NA	NA	NA	NA	NA	NA	NA
TRINITY_DN15116_c1_g4	cre:CHLREDRAFT_186680	41.9	3.3e-28	NA	NA	NA	NA	NA	NA	NA	NA	NA
TRINITY_DN15116_c1_g5	vcn:VOLCADRAFT_108270	39.1	2.2e-11	NA	NA	NA	NA	NA	NA	NA	NA	NA
TRINITY_DN15117_c2_g1	nnu:104608226	39.3	1.9e-106	NA	NA	NA	NA	NA	NA	NA	NA	NA
TRINITY_DN15117_c2_g2	osa:4340881	38.4	3.1e-29	NA	NA	NA	NA	NA	NA	NA	NA	NA
TRINITY_DN15117_c2_g4	jcu:105649151	53.8	4.5e-76	-	hydroxyacylglutathione hydrolase cytoplasmic	K01069	hydroxyacylglutathione hydrolase	EC:3.1.2.6	jcu00620	Pyruvate metabolism	Metabolism	Carbohydrate metabolism
TRINITY_DN15117_c2_g5	fve:101311565	25.6	2.8e-28	NA	NA	NA	NA	NA	NA	NA	NA	NA
TRINITY_DN15119_c0_g12	pmum:103325546	49.6	3.2e-30	-	pre-mRNA-splicing factor ATP-dependent RNA helicase DEAH7-like	K12815	pre-mRNA-splicing factor ATP-dependent RNA helicase DHX38/PRP16	EC:3.6.4.13	pmum03040	Spliceosome	Genetic Information Processing	Transcription
TRINITY_DN15119_c0_g2	atr:18439651	62.9	1.2e-295	-	pre-mRNA-splicing factor ATP-dependent RNA helicase DEAH7 isoform X1	K12815	pre-mRNA-splicing factor ATP-dependent RNA helicase DHX38/PRP16	EC:3.6.4.13	atr03040	Spliceosome	Genetic Information Processing	Transcription
TRINITY_DN15119_c0_g3	mis:MICPUN_90789	50	3.4e-17	-	ras-related gtp-binding protein	K07901	Ras-related protein Rab-8A	-	mis04144	Endocytosis	Cellular Processes	Transport and catabolism
TRINITY_DN15122_c1_g1	lang:109356186	37.2	1.5e-42	-	mitogen-activated protein kinase kinase 2-like	K20603	mitogen-activated protein kinase kinase 2	EC:2.7.12.2	lang04016	MAPK signaling pathway - plant	Environmental Information Processing	Signal transduction
TRINITY_DN15125_c0_g1	eus:EUTSA_v10019770mg	66.2	1e-136	NA	NA	NA	NA	NA	NA	NA	NA	NA
TRINITY_DN15125_c0_g2	lang:109344923	31.5	1.9e-10	NA	NA	NA	NA	NA	NA	NA	NA	NA
TRINITY_DN15127_c0_g1	bpg:Bathy14g00030	47.6	1.4e-29	-	ABC transporter C family protein	K05665	ATP-binding cassette, subfamily C (CFTR/MRP), member 1	-	bpg02010	ABC transporters	Environmental Information Processing	Membrane transport
TRINITY_DN15127_c0_g2	cvr:CHLNCDRAFT_138968	36.1	6.8e-17	NA	NA	NA	NA	NA	NA	NA	NA	NA
TRINITY_DN15127_c0_g4	brp:103848861	37.7	1.7e-32	-	phosphoinositide phospholipase C 2	K05857	phosphatidylinositol phospholipase C, delta	EC:3.1.4.11	brp00562	Inositol phosphate metabolism	Metabolism	Carbohydrate metabolism
TRINITY_DN15127_c0_g4	brp:103848861	37.7	1.7e-32	-	phosphoinositide phospholipase C 2	K05857	phosphatidylinositol phospholipase C, delta	EC:3.1.4.11	brp04070	Phosphatidylinositol signaling system	Environmental Information Processing	Signal transduction
TRINITY_DN15127_c0_g4	brp:103848861	37.7	1.7e-32	-	phosphoinositide phospholipase C 2	K05857	phosphatidylinositol phospholipase C, delta	EC:3.1.4.11	brp04933	AGE-RAGE signaling pathway in diabetic complications	Human Diseases	Endocrine and metabolic diseases
TRINITY_DN15128_c0_g2	cvr:CHLNCDRAFT_18894	37.1	1.1e-24	NA	NA	NA	NA	NA	NA	NA	NA	NA
TRINITY_DN15129_c1_g1	sbi:8061610	42.5	1.9e-40	NA	NA	NA	NA	NA	NA	NA	NA	NA
TRINITY_DN15129_c2_g1	csl:COCSUDRAFT_16765	33.1	2.5e-35	NA	NA	NA	NA	NA	NA	NA	NA	NA
TRINITY_DN15129_c3_g1	smo:SELMODRAFT_119112	32.3	1.2e-17	NA	NA	NA	NA	NA	NA	NA	NA	NA
TRINITY_DN15130_c0_g1	pxb:103958594	50	4.7e-48	NA	NA	NA	NA	NA	NA	NA	NA	NA
TRINITY_DN15130_c0_g2	ccaj:109798503	60.5	1.8e-23	NA	NA	NA	NA	NA	NA	NA	NA	NA
TRINITY_DN15133_c0_g5	cam:101495600	39.3	1.4e-25	NA	NA	NA	NA	NA	NA	NA	NA	NA
TRINITY_DN15134_c1_g1	bvg:104895619	28.9	6.3e-26	NA	NA	NA	NA	NA	NA	NA	NA	NA
TRINITY_DN15134_c1_g3	adu:107460320	43.2	2.1e-08	-	E3 ubiquitin-protein ligase RNF185	K10666	E3 ubiquitin-protein ligase RNF5	EC:2.3.2.27	adu04141	Protein processing in endoplasmic reticulum	Genetic Information Processing	Folding, sorting and degradation
TRINITY_DN15138_c1_g1	smo:SELMODRAFT_2653	49.3	1.9e-62	NA	NA	NA	NA	NA	NA	NA	NA	NA
TRINITY_DN15138_c1_g3	nto:104103554	35.9	4.4e-35	NA	NA	NA	NA	NA	NA	NA	NA	NA
TRINITY_DN15140_c0_g1	cvr:CHLNCDRAFT_34065	64	1.1e-135	-	hypothetical protein	K01431	beta-ureidopropionase	EC:3.5.1.6	cvr00240	Pyrimidine metabolism	Metabolism	Nucleotide metabolism
TRINITY_DN15140_c0_g1	cvr:CHLNCDRAFT_34065	64	1.1e-135	-	hypothetical protein	K01431	beta-ureidopropionase	EC:3.5.1.6	cvr00410	beta-Alanine metabolism	Metabolism	Metabolism of other amino acids
TRINITY_DN15140_c0_g1	cvr:CHLNCDRAFT_34065	64	1.1e-135	-	hypothetical protein	K01431	beta-ureidopropionase	EC:3.5.1.6	cvr00770	Pantothenate and CoA biosynthesis	Metabolism	Metabolism of cofactors and vitamins
TRINITY_DN15141_c0_g3	gsl:Gasu_13500	51.7	2.9e-100	-	minichromosome maintenance family (MCM)	K02542	DNA replication licensing factor MCM6	EC:3.6.4.12	gsl03030	DNA replication	Genetic Information Processing	Replication and repair
TRINITY_DN15145_c0_g1	obr:102709407	31.6	1.5e-27	NA	NA	NA	NA	NA	NA	NA	NA	NA
TRINITY_DN15147_c3_g1	smo:SELMODRAFT_168332	20.7	2.9e-08	-	hypothetical protein	K17917	sorting nexin-1/2	-	smo04144	Endocytosis	Cellular Processes	Transport and catabolism
TRINITY_DN15147_c3_g4	zju:107421570	42.9	4.8e-06	-	polyadenylate-binding protein 3	K13126	polyadenylate-binding protein	-	zju03013	RNA transport	Genetic Information Processing	Translation
TRINITY_DN15147_c3_g4	zju:107421570	42.9	4.8e-06	-	polyadenylate-binding protein 3	K13126	polyadenylate-binding protein	-	zju03015	mRNA surveillance pathway	Genetic Information Processing	Translation
TRINITY_DN15147_c3_g4	zju:107421570	42.9	4.8e-06	-	polyadenylate-binding protein 3	K13126	polyadenylate-binding protein	-	zju03018	RNA degradation	Genetic Information Processing	Folding, sorting and degradation
TRINITY_DN15149_c0_g1	eus:EUTSA_v10004083mg	30.2	2e-43	-	hypothetical protein	K13412	calcium-dependent protein kinase	EC:2.7.11.1	eus04626	Plant-pathogen interaction	Organismal Systems	Environmental adaptation
TRINITY_DN15153_c5_g3	csv:101208630	43.4	3.2e-104	NA	NA	NA	NA	NA	NA	NA	NA	NA
TRINITY_DN15156_c0_g2	ccp:CHC_T00006854001	24.6	1.3e-11	NA	NA	NA	NA	NA	NA	NA	NA	NA
TRINITY_DN15158_c4_g1	mng:MNEG_9048	30	1.7e-17	-	hypothetical protein	K13519	lysophospholipid acyltransferase	EC:2.3.1.51 2.3.1.23 2.3.1.-	mng00561	Glycerolipid metabolism	Metabolism	Lipid metabolism
TRINITY_DN15158_c4_g1	mng:MNEG_9048	30	1.7e-17	-	hypothetical protein	K13519	lysophospholipid acyltransferase	EC:2.3.1.51 2.3.1.23 2.3.1.-	mng00564	Glycerophospholipid metabolism	Metabolism	Lipid metabolism
TRINITY_DN15158_c4_g1	mng:MNEG_9048	30	1.7e-17	-	hypothetical protein	K13519	lysophospholipid acyltransferase	EC:2.3.1.51 2.3.1.23 2.3.1.-	mng00565	Ether lipid metabolism	Metabolism	Lipid metabolism
TRINITY_DN15159_c0_g4	aly:ARALYDRAFT_478844	25.1	2e-20	-	phosphatidylinositol-4-phosphate 5-kinase family protein	K00921	1-phosphatidylinositol-3-phosphate 5-kinase	EC:2.7.1.150	aly00562	Inositol phosphate metabolism	Metabolism	Carbohydrate metabolism
TRINITY_DN15159_c0_g4	aly:ARALYDRAFT_478844	25.1	2e-20	-	phosphatidylinositol-4-phosphate 5-kinase family protein	K00921	1-phosphatidylinositol-3-phosphate 5-kinase	EC:2.7.1.150	aly04070	Phosphatidylinositol signaling system	Environmental Information Processing	Signal transduction
TRINITY_DN15159_c0_g4	aly:ARALYDRAFT_478844	25.1	2e-20	-	phosphatidylinositol-4-phosphate 5-kinase family protein	K00921	1-phosphatidylinositol-3-phosphate 5-kinase	EC:2.7.1.150	aly04145	Phagosome	Cellular Processes	Transport and catabolism
TRINITY_DN15161_c1_g3	cmo:103490860	41.3	1.3e-25	-	probable enoyl-CoA hydratase 2	K05607	methylglutaconyl-CoA hydratase	EC:4.2.1.18	cmo00280	Valine, leucine and isoleucine degradation	Metabolism	Amino acid metabolism
TRINITY_DN15162_c0_g1	vcn:VOLCADRAFT_30475	29.4	7.1e-10	NA	NA	NA	NA	NA	NA	NA	NA	NA
TRINITY_DN15163_c0_g1	mcha:111007669	31.5	1.4e-35	-	alpha-1	K00726	alpha-1,3-mannosyl-glycoprotein beta-1,2-N-acetylglucosaminyltransferase	EC:2.4.1.101	mcha00510	N-Glycan biosynthesis	Metabolism	Glycan biosynthesis and metabolism
TRINITY_DN15167_c0_g5	gra:105789873	35	7.1e-11	NA	NA	NA	NA	NA	NA	NA	NA	NA
TRINITY_DN15167_c0_g6	cit:107178362	34.8	9.8e-08	NA	NA	NA	NA	NA	NA	NA	NA	NA
TRINITY_DN15168_c2_g2	csl:COCSUDRAFT_66269	33.8	1.1e-09	-	hypothetical protein	K12831	splicing factor 3B subunit 4	-	csl03040	Spliceosome	Genetic Information Processing	Transcription
TRINITY_DN15169_c2_g3	egu:105039919	46.2	6.5e-78	-	dnaJ protein ERDJ3B	K09517	DnaJ homolog subfamily B member 11	-	egu04141	Protein processing in endoplasmic reticulum	Genetic Information Processing	Folding, sorting and degradation
TRINITY_DN15171_c2_g3	gsl:Gasu_50230	30.8	2e-26	-	Rab family	K07897	Ras-related protein Rab-7A	-	gsl04144	Endocytosis	Cellular Processes	Transport and catabolism
TRINITY_DN15171_c2_g3	gsl:Gasu_50230	30.8	2e-26	-	Rab family	K07897	Ras-related protein Rab-7A	-	gsl04145	Phagosome	Cellular Processes	Transport and catabolism
TRINITY_DN15171_c3_g3	gsl:Gasu_51900	52.2	5.2e-60	NA	NA	NA	NA	NA	NA	NA	NA	NA
TRINITY_DN15174_c0_g2	vcn:VOLCADRAFT_62343	30.3	4.6e-15	NA	NA	NA	NA	NA	NA	NA	NA	NA
TRINITY_DN15175_c0_g2	sot:102584781	35.1	2.9e-154	NA	NA	NA	NA	NA	NA	NA	NA	NA
TRINITY_DN15178_c0_g3	csl:COCSUDRAFT_36427	49.5	2.3e-79	-	putative beta-N-acetylhexosaminidase	K12373	hexosaminidase	EC:3.2.1.52	csl00520	Amino sugar and nucleotide sugar metabolism	Metabolism	Carbohydrate metabolism
TRINITY_DN15178_c0_g3	csl:COCSUDRAFT_36427	49.5	2.3e-79	-	putative beta-N-acetylhexosaminidase	K12373	hexosaminidase	EC:3.2.1.52	csl00531	Glycosaminoglycan degradation	Metabolism	Glycan biosynthesis and metabolism
TRINITY_DN15178_c0_g3	csl:COCSUDRAFT_36427	49.5	2.3e-79	-	putative beta-N-acetylhexosaminidase	K12373	hexosaminidase	EC:3.2.1.52	csl00603	Glycosphingolipid biosynthesis - globo and isoglobo series	Metabolism	Glycan biosynthesis and metabolism
TRINITY_DN15178_c0_g3	csl:COCSUDRAFT_36427	49.5	2.3e-79	-	putative beta-N-acetylhexosaminidase	K12373	hexosaminidase	EC:3.2.1.52	csl00604	Glycosphingolipid biosynthesis - ganglio series	Metabolism	Glycan biosynthesis and metabolism
TRINITY_DN15178_c0_g3	csl:COCSUDRAFT_36427	49.5	2.3e-79	-	putative beta-N-acetylhexosaminidase	K12373	hexosaminidase	EC:3.2.1.52	csl00511	Other glycan degradation	Metabolism	Glycan biosynthesis and metabolism
TRINITY_DN15178_c0_g6	ini:109170650	55.3	2.4e-104	-	serine/threonine-protein kinase rio2	K07179	RIO kinase 2	EC:2.7.11.1	ini03008	Ribosome biogenesis in eukaryotes	Genetic Information Processing	Translation
TRINITY_DN15179_c0_g1	gsl:Gasu_60230	35.5	4.8e-16	-	5' nucleotidase family protein	K01081	5'-nucleotidase	EC:3.1.3.5	gsl00230	Purine metabolism	Metabolism	Nucleotide metabolism
TRINITY_DN15179_c0_g1	gsl:Gasu_60230	35.5	4.8e-16	-	5' nucleotidase family protein	K01081	5'-nucleotidase	EC:3.1.3.5	gsl00240	Pyrimidine metabolism	Metabolism	Nucleotide metabolism
TRINITY_DN15179_c0_g1	gsl:Gasu_60230	35.5	4.8e-16	-	5' nucleotidase family protein	K01081	5'-nucleotidase	EC:3.1.3.5	gsl00760	Nicotinate and nicotinamide metabolism	Metabolism	Metabolism of cofactors and vitamins
TRINITY_DN15179_c0_g2	csl:COCSUDRAFT_11877	47.4	8.6e-123	-	O-phosphoseryl-tRNA selenium transferase	K03341	O-phospho-L-seryl-tRNASec:L-selenocysteinyl-tRNA synthase	EC:2.9.1.2	csl00450	Selenocompound metabolism	Metabolism	Metabolism of other amino acids
TRINITY_DN15179_c0_g2	csl:COCSUDRAFT_11877	47.4	8.6e-123	-	O-phosphoseryl-tRNA selenium transferase	K03341	O-phospho-L-seryl-tRNASec:L-selenocysteinyl-tRNA synthase	EC:2.9.1.2	csl00970	Aminoacyl-tRNA biosynthesis	Genetic Information Processing	Translation
TRINITY_DN15180_c0_g4	ats:109739233	37.1	1.7e-09	LOC109739233	syntaxin-32	K08490	syntaxin 5	-	ats04130	SNARE interactions in vesicular transport	Genetic Information Processing	Folding, sorting and degradation
TRINITY_DN15182_c1_g4	cvr:CHLNCDRAFT_58922	52.4	1.6e-13	-	hypothetical protein	K12827	splicing factor 3A subunit 3	-	cvr03040	Spliceosome	Genetic Information Processing	Transcription
TRINITY_DN15185_c0_g3	ccp:CHC_T00008685001	49.2	7.3e-31	NA	NA	NA	NA	NA	NA	NA	NA	NA
TRINITY_DN15186_c0_g1	vcn:VOLCADRAFT_61364	46.2	5.6e-37	cyc2	guanylyl and adenylyl cyclase family member	K12319	guanylate cyclase soluble subunit beta	EC:4.6.1.2	vcn00230	Purine metabolism	Metabolism	Nucleotide metabolism
TRINITY_DN15187_c1_g2	gsl:Gasu_08370	65.7	8.7e-06	-	NAD+ kinase	K00858	NAD+ kinase	EC:2.7.1.23	gsl00760	Nicotinate and nicotinamide metabolism	Metabolism	Metabolism of cofactors and vitamins
TRINITY_DN15188_c1_g1	brp:103842418	29.2	9.2e-14	-	polyadenylate-binding protein 4-like	K13126	polyadenylate-binding protein	-	brp03013	RNA transport	Genetic Information Processing	Translation
TRINITY_DN15188_c1_g1	brp:103842418	29.2	9.2e-14	-	polyadenylate-binding protein 4-like	K13126	polyadenylate-binding protein	-	brp03015	mRNA surveillance pathway	Genetic Information Processing	Translation
TRINITY_DN15188_c1_g1	brp:103842418	29.2	9.2e-14	-	polyadenylate-binding protein 4-like	K13126	polyadenylate-binding protein	-	brp03018	RNA degradation	Genetic Information Processing	Folding, sorting and degradation
TRINITY_DN15190_c0_g5	soe:110775899	48.1	2.2e-18	NA	NA	NA	NA	NA	NA	NA	NA	NA
TRINITY_DN15190_c0_g8	ghi:107951313	41.2	3.2e-103	-	probable trehalase	K01194	alpha,alpha-trehalase	EC:3.2.1.28	ghi00500	Starch and sucrose metabolism	Metabolism	Carbohydrate metabolism
TRINITY_DN15194_c0_g1	cre:CHLREDRAFT_144460	58.3	7.4e-29	NA	NA	NA	NA	NA	NA	NA	NA	NA
TRINITY_DN15195_c3_g3	ini:109167665	33.8	1.4e-17	NA	NA	NA	NA	NA	NA	NA	NA	NA
TRINITY_DN15196_c1_g1	dct:110098611	40.8	7.5e-23	NA	NA	NA	NA	NA	NA	NA	NA	NA
TRINITY_DN15200_c1_g2	cre:CHLREDRAFT_24355	51.2	5.6e-65	STD1	serine/threonine dehydratase	K12235	serine racemase	EC:5.1.1.18	cre00260	Glycine, serine and threonine metabolism	Metabolism	Amino acid metabolism
TRINITY_DN15201_c0_g1	han:110894392	27	1.2e-91	-	nuclear pore complex protein NUP155-like	K14312	nuclear pore complex protein Nup155	-	han03013	RNA transport	Genetic Information Processing	Translation
TRINITY_DN15202_c5_g1	adu:107461365	43.8	1.6e-54	NA	NA	NA	NA	NA	NA	NA	NA	NA
TRINITY_DN15202_c5_g2	vcn:VOLCADRAFT_77509	52.6	3.2e-34	NA	NA	NA	NA	NA	NA	NA	NA	NA
TRINITY_DN15202_c5_g7	csl:COCSUDRAFT_33822	80	2.8e-32	-	ribosomal protein S1	K02969	small subunit ribosomal protein S20e	-	csl03010	Ribosome	Genetic Information Processing	Translation
TRINITY_DN15203_c0_g1	spen:107028302	32.7	2.4e-59	-	ABC transporter C family member 2-like	K05666	ATP-binding cassette, subfamily C (CFTR/MRP), member 2	-	spen02010	ABC transporters	Environmental Information Processing	Membrane transport
TRINITY_DN15206_c6_g1	mng:MNEG_15869	40.2	9.5e-13	NA	NA	NA	NA	NA	NA	NA	NA	NA
TRINITY_DN15209_c1_g3	mng:MNEG_10366	70.2	2.7e-48	NA	NA	NA	NA	NA	NA	NA	NA	NA
TRINITY_DN15213_c0_g3	smo:SELMODRAFT_438556	56.1	2e-06	NA	NA	NA	NA	NA	NA	NA	NA	NA
TRINITY_DN15215_c4_g1	ath:AT4G05420	45.3	2.3e-282	DDB1A	damaged DNA binding protein 1A	K10610	DNA damage-binding protein 1	-	ath04120	Ubiquitin mediated proteolysis	Genetic Information Processing	Folding, sorting and degradation
TRINITY_DN15215_c4_g1	ath:AT4G05420	45.3	2.3e-282	DDB1A	damaged DNA binding protein 1A	K10610	DNA damage-binding protein 1	-	ath03420	Nucleotide excision repair	Genetic Information Processing	Replication and repair
TRINITY_DN15215_c5_g2	smo:SELMODRAFT_162334	35.4	1.6e-47	NA	NA	NA	NA	NA	NA	NA	NA	NA
TRINITY_DN15216_c2_g1	gsl:Gasu_56740	39.5	2e-15	-	1-alkyl-2-acetylglycerophosphocholine esterase	K01062	platelet-activating factor acetylhydrolase	EC:3.1.1.47	gsl00565	Ether lipid metabolism	Metabolism	Lipid metabolism
TRINITY_DN15221_c0_g1	smo:SELMODRAFT_90697	43.6	3.2e-54	-	hypothetical protein	K10950	ERO1-like protein alpha	EC:1.8.4.-	smo04141	Protein processing in endoplasmic reticulum	Genetic Information Processing	Folding, sorting and degradation
TRINITY_DN15222_c2_g2	dct:110092410	45.4	2.3e-67	-	alpha-mannosidase I MNS5 isoform X1	K10084	ER degradation enhancer, mannosidase alpha-like 1	-	dct04141	Protein processing in endoplasmic reticulum	Genetic Information Processing	Folding, sorting and degradation
TRINITY_DN15223_c2_g1	mtr:MTR_1g044720	24.8	4e-06	-	Pre-mRNA-processing factor	K10599	pre-mRNA-processing factor 19	EC:2.3.2.27	mtr03040	Spliceosome	Genetic Information Processing	Transcription
TRINITY_DN15223_c2_g1	mtr:MTR_1g044720	24.8	4e-06	-	Pre-mRNA-processing factor	K10599	pre-mRNA-processing factor 19	EC:2.3.2.27	mtr04120	Ubiquitin mediated proteolysis	Genetic Information Processing	Folding, sorting and degradation
TRINITY_DN15230_c0_g1	obr:102716627	36.9	2.5e-85	-	pre-mRNA-processing factor 19	K10599	pre-mRNA-processing factor 19	EC:2.3.2.27	obr03040	Spliceosome	Genetic Information Processing	Transcription
TRINITY_DN15230_c0_g1	obr:102716627	36.9	2.5e-85	-	pre-mRNA-processing factor 19	K10599	pre-mRNA-processing factor 19	EC:2.3.2.27	obr04120	Ubiquitin mediated proteolysis	Genetic Information Processing	Folding, sorting and degradation
TRINITY_DN15232_c2_g3	csl:COCSUDRAFT_38065	54.3	9e-77	NA	NA	NA	NA	NA	NA	NA	NA	NA
TRINITY_DN15232_c2_g4	ini:109178501	32.7	1e-78	-	acyl-coenzyme A oxidase 2	K00232	acyl-CoA oxidase	EC:1.3.3.6	ini00071	Fatty acid degradation	Metabolism	Lipid metabolism
TRINITY_DN15232_c2_g4	ini:109178501	32.7	1e-78	-	acyl-coenzyme A oxidase 2	K00232	acyl-CoA oxidase	EC:1.3.3.6	ini00592	alpha-Linolenic acid metabolism	Metabolism	Lipid metabolism
TRINITY_DN15232_c2_g4	ini:109178501	32.7	1e-78	-	acyl-coenzyme A oxidase 2	K00232	acyl-CoA oxidase	EC:1.3.3.6	ini01040	Biosynthesis of unsaturated fatty acids	Metabolism	Lipid metabolism
TRINITY_DN15232_c2_g4	ini:109178501	32.7	1e-78	-	acyl-coenzyme A oxidase 2	K00232	acyl-CoA oxidase	EC:1.3.3.6	ini04146	Peroxisome	Cellular Processes	Transport and catabolism
TRINITY_DN15233_c4_g5	han:110883990	41.7	8.3e-35	NA	NA	NA	NA	NA	NA	NA	NA	NA
TRINITY_DN15236_c0_g1	mcha:111012494	38.8	1.9e-09	-	vesicle-associated membrane protein 711	K08515	vesicle-associated membrane protein 7	-	mcha04130	SNARE interactions in vesicular transport	Genetic Information Processing	Folding, sorting and degradation
TRINITY_DN15236_c1_g1	vcn:VOLCADRAFT_78158	35.8	4.7e-12	NA	NA	NA	NA	NA	NA	NA	NA	NA
TRINITY_DN15236_c1_g3	vcn:VOLCADRAFT_78158	51	4.2e-06	NA	NA	NA	NA	NA	NA	NA	NA	NA
TRINITY_DN15236_c2_g2	bdi:100833737	60.5	3.1e-60	NA	NA	NA	NA	NA	NA	NA	NA	NA
TRINITY_DN15237_c0_g4	soe:110774973	33.3	3.6e-12	NA	NA	NA	NA	NA	NA	NA	NA	NA
TRINITY_DN15242_c1_g2	atr:18432438	56.8	3.9e-184	-	ABC transporter B family member 25	K05663	mitochondrial ABC transporter ATM	-	atr02010	ABC transporters	Environmental Information Processing	Membrane transport
TRINITY_DN15243_c0_g2	thj:104814475	36.9	9.6e-73	-	heat shock 70 kDa protein 17-like	K09486	hypoxia up-regulated 1	-	thj04141	Protein processing in endoplasmic reticulum	Genetic Information Processing	Folding, sorting and degradation
TRINITY_DN15246_c0_g1	csv:101222000	25.7	2.5e-43	-	ceramide kinase	K04715	ceramide kinase	EC:2.7.1.138	csv00600	Sphingolipid metabolism	Metabolism	Lipid metabolism
TRINITY_DN15248_c1_g2	vcn:VOLCADRAFT_93520	37.4	3.9e-15	NA	NA	NA	NA	NA	NA	NA	NA	NA
TRINITY_DN15248_c2_g1	mdm:103444978	34.9	3.1e-41	NA	NA	NA	NA	NA	NA	NA	NA	NA
TRINITY_DN15250_c3_g1	csl:COCSUDRAFT_68001	28	4.7e-20	NA	NA	NA	NA	NA	NA	NA	NA	NA
TRINITY_DN15251_c0_g4	ini:109152367	30.2	3e-32	NA	NA	NA	NA	NA	NA	NA	NA	NA
TRINITY_DN15251_c0_g8	pmum:103327811	35.4	5e-13	-	polyadenylate-binding protein 4-like	K13126	polyadenylate-binding protein	-	pmum03013	RNA transport	Genetic Information Processing	Translation
TRINITY_DN15251_c0_g8	pmum:103327811	35.4	5e-13	-	polyadenylate-binding protein 4-like	K13126	polyadenylate-binding protein	-	pmum03015	mRNA surveillance pathway	Genetic Information Processing	Translation
TRINITY_DN15251_c0_g8	pmum:103327811	35.4	5e-13	-	polyadenylate-binding protein 4-like	K13126	polyadenylate-binding protein	-	pmum03018	RNA degradation	Genetic Information Processing	Folding, sorting and degradation
TRINITY_DN15254_c1_g1	vcn:VOLCADRAFT_88920	60	3.3e-10	NA	NA	NA	NA	NA	NA	NA	NA	NA
TRINITY_DN15254_c1_g2	mng:MNEG_0822	31.4	2.1e-39	NA	NA	NA	NA	NA	NA	NA	NA	NA
TRINITY_DN15258_c0_g3	smo:SELMODRAFT_271856	42.2	6.6e-58	NA	NA	NA	NA	NA	NA	NA	NA	NA
TRINITY_DN15258_c0_g4	thj:104807892	59.3	3.5e-16	NA	NA	NA	NA	NA	NA	NA	NA	NA
TRINITY_DN15259_c1_g3	ini:109151989	33.4	1.1e-44	-	probable ethanolamine kinase	K00894	ethanolamine kinase	EC:2.7.1.82	ini00564	Glycerophospholipid metabolism	Metabolism	Lipid metabolism
TRINITY_DN15259_c2_g1	jcu:105642293	41.7	4.2e-17	NA	NA	NA	NA	NA	NA	NA	NA	NA
TRINITY_DN15259_c2_g4	gsl:Gasu_44350	46.3	6.8e-30	NA	NA	NA	NA	NA	NA	NA	NA	NA
TRINITY_DN15260_c0_g1	gmx:102664257	44.4	4.7e-59	NA	NA	NA	NA	NA	NA	NA	NA	NA
TRINITY_DN15260_c0_g3	cmo:103492568	50.7	8.8e-31	NA	NA	NA	NA	NA	NA	NA	NA	NA
TRINITY_DN15262_c0_g2	cann:107864527	30.9	8.7e-18	NA	NA	NA	NA	NA	NA	NA	NA	NA
TRINITY_DN15263_c1_g1	smo:SELMODRAFT_97360	40.9	1.2e-18	-	hypothetical protein	K00914	phosphatidylinositol 3-kinase	EC:2.7.1.137	smo00562	Inositol phosphate metabolism	Metabolism	Carbohydrate metabolism
TRINITY_DN15263_c1_g1	smo:SELMODRAFT_97360	40.9	1.2e-18	-	hypothetical protein	K00914	phosphatidylinositol 3-kinase	EC:2.7.1.137	smo04070	Phosphatidylinositol signaling system	Environmental Information Processing	Signal transduction
TRINITY_DN15263_c1_g1	smo:SELMODRAFT_97360	40.9	1.2e-18	-	hypothetical protein	K00914	phosphatidylinositol 3-kinase	EC:2.7.1.137	smo04145	Phagosome	Cellular Processes	Transport and catabolism
TRINITY_DN15263_c1_g1	smo:SELMODRAFT_97360	40.9	1.2e-18	-	hypothetical protein	K00914	phosphatidylinositol 3-kinase	EC:2.7.1.137	smo04136	Autophagy - other eukaryotes	Cellular Processes	Transport and catabolism
TRINITY_DN15263_c1_g2	osa:4339369	29.6	1.8e-16	-	ATP-dependent 6-phosphofructokinase 6	K00850	6-phosphofructokinase 1	EC:2.7.1.11	osa00010	Glycolysis / Gluconeogenesis	Metabolism	Carbohydrate metabolism
TRINITY_DN15263_c1_g2	osa:4339369	29.6	1.8e-16	-	ATP-dependent 6-phosphofructokinase 6	K00850	6-phosphofructokinase 1	EC:2.7.1.11	osa00030	Pentose phosphate pathway	Metabolism	Carbohydrate metabolism
TRINITY_DN15263_c1_g2	osa:4339369	29.6	1.8e-16	-	ATP-dependent 6-phosphofructokinase 6	K00850	6-phosphofructokinase 1	EC:2.7.1.11	osa00051	Fructose and mannose metabolism	Metabolism	Carbohydrate metabolism
TRINITY_DN15263_c1_g2	osa:4339369	29.6	1.8e-16	-	ATP-dependent 6-phosphofructokinase 6	K00850	6-phosphofructokinase 1	EC:2.7.1.11	osa00052	Galactose metabolism	Metabolism	Carbohydrate metabolism
TRINITY_DN15263_c1_g2	osa:4339369	29.6	1.8e-16	-	ATP-dependent 6-phosphofructokinase 6	K00850	6-phosphofructokinase 1	EC:2.7.1.11	osa03018	RNA degradation	Genetic Information Processing	Folding, sorting and degradation
TRINITY_DN15263_c1_g3	bdi:100821809	29.3	3e-16	-	ATP-dependent 6-phosphofructokinase 6	K00850	6-phosphofructokinase 1	EC:2.7.1.11	bdi00010	Glycolysis / Gluconeogenesis	Metabolism	Carbohydrate metabolism
TRINITY_DN15263_c1_g3	bdi:100821809	29.3	3e-16	-	ATP-dependent 6-phosphofructokinase 6	K00850	6-phosphofructokinase 1	EC:2.7.1.11	bdi00030	Pentose phosphate pathway	Metabolism	Carbohydrate metabolism
TRINITY_DN15263_c1_g3	bdi:100821809	29.3	3e-16	-	ATP-dependent 6-phosphofructokinase 6	K00850	6-phosphofructokinase 1	EC:2.7.1.11	bdi00051	Fructose and mannose metabolism	Metabolism	Carbohydrate metabolism
TRINITY_DN15263_c1_g3	bdi:100821809	29.3	3e-16	-	ATP-dependent 6-phosphofructokinase 6	K00850	6-phosphofructokinase 1	EC:2.7.1.11	bdi00052	Galactose metabolism	Metabolism	Carbohydrate metabolism
TRINITY_DN15263_c1_g3	bdi:100821809	29.3	3e-16	-	ATP-dependent 6-phosphofructokinase 6	K00850	6-phosphofructokinase 1	EC:2.7.1.11	bdi03018	RNA degradation	Genetic Information Processing	Folding, sorting and degradation
TRINITY_DN15271_c3_g2	smo:SELMODRAFT_450749	36.9	1.1e-31	NA	NA	NA	NA	NA	NA	NA	NA	NA
TRINITY_DN15271_c3_g3	smo:SELMODRAFT_450747	47.1	9.1e-238	NA	NA	NA	NA	NA	NA	NA	NA	NA
TRINITY_DN15273_c0_g1	csat:104792573	52.5	1.1e-06	NA	NA	NA	NA	NA	NA	NA	NA	NA
TRINITY_DN15273_c2_g2	cit:102608159	34.6	1.5e-10	NA	NA	NA	NA	NA	NA	NA	NA	NA
TRINITY_DN15275_c0_g1	cme:CYME_CMH036C	53.4	7.7e-93	-	O-acetylserine (thiol)-lyase 2	K01738	cysteine synthase	EC:2.5.1.47	cme00920	Sulfur metabolism	Metabolism	Energy metabolism
TRINITY_DN15275_c0_g1	cme:CYME_CMH036C	53.4	7.7e-93	-	O-acetylserine (thiol)-lyase 2	K01738	cysteine synthase	EC:2.5.1.47	cme00270	Cysteine and methionine metabolism	Metabolism	Amino acid metabolism
TRINITY_DN15275_c2_g1	obr:102709407	35.7	4.8e-36	NA	NA	NA	NA	NA	NA	NA	NA	NA
TRINITY_DN15276_c0_g1	mng:MNEG_10073	38.2	3.4e-15	-	Exosome complex exonuclease RRP46	K12590	exosome complex component RRP46	-	mng03018	RNA degradation	Genetic Information Processing	Folding, sorting and degradation
TRINITY_DN15276_c0_g2	gsl:Gasu_13570	44	1.4e-79	NA	NA	NA	NA	NA	NA	NA	NA	NA
TRINITY_DN15276_c0_g5	mus:103982223	39.4	2e-95	NA	NA	NA	NA	NA	NA	NA	NA	NA
TRINITY_DN15277_c0_g1	vcn:VOLCADRAFT_118613	45.4	1e-128	NA	NA	NA	NA	NA	NA	NA	NA	NA
TRINITY_DN15281_c0_g2	mtr:MTR_0147s0060	60.4	2.5e-11	NA	NA	NA	NA	NA	NA	NA	NA	NA
TRINITY_DN15282_c0_g1	bdi:100832572	30.7	2.8e-15	NA	NA	NA	NA	NA	NA	NA	NA	NA
TRINITY_DN15283_c2_g1	mis:MICPUN_86515	64	5.1e-64	-	predicted protein	K10575	ubiquitin-conjugating enzyme E2 G1	EC:2.3.2.23	mis04141	Protein processing in endoplasmic reticulum	Genetic Information Processing	Folding, sorting and degradation
TRINITY_DN15283_c2_g1	mis:MICPUN_86515	64	5.1e-64	-	predicted protein	K10575	ubiquitin-conjugating enzyme E2 G1	EC:2.3.2.23	mis04120	Ubiquitin mediated proteolysis	Genetic Information Processing	Folding, sorting and degradation
TRINITY_DN15285_c1_g8	nta:107762617	42.5	7.4e-15	NA	NA	NA	NA	NA	NA	NA	NA	NA
TRINITY_DN15285_c1_g9	csl:COCSUDRAFT_83706	26.1	1.3e-08	NA	NA	NA	NA	NA	NA	NA	NA	NA
TRINITY_DN15288_c0_g1	csv:101222809	29.3	2.6e-43	NA	NA	NA	NA	NA	NA	NA	NA	NA
TRINITY_DN15294_c2_g1	sind:105163497	51.1	1.8e-170	NA	NA	NA	NA	NA	NA	NA	NA	NA
TRINITY_DN15298_c3_g2	osa:4352851	66.6	1.1e-149	NA	NA	NA	NA	NA	NA	NA	NA	NA
TRINITY_DN15300_c1_g2	gra:105785547	32.1	2.9e-08	-	DNA polymerase beta	K03512	DNA polymerase lambda	EC:2.7.7.7 4.2.99.-	gra03410	Base excision repair	Genetic Information Processing	Replication and repair
TRINITY_DN15300_c1_g2	gra:105785547	32.1	2.9e-08	-	DNA polymerase beta	K03512	DNA polymerase lambda	EC:2.7.7.7 4.2.99.-	gra03450	Non-homologous end-joining	Genetic Information Processing	Replication and repair
TRINITY_DN15301_c2_g3	lja:Lj1g3v4591220.1	59.4	2e-41	Lj1g3v4591220.1	-	K05658	ATP-binding cassette, subfamily B (MDR/TAP), member 1	EC:3.6.3.44	lja02010	ABC transporters	Environmental Information Processing	Membrane transport
TRINITY_DN15301_c2_g4	gsl:Gasu_53410	36.8	5.2e-79	NA	NA	NA	NA	NA	NA	NA	NA	NA
TRINITY_DN15302_c1_g1	pvu:PHAVU_008G047400g	35.8	1.9e-23	NA	NA	NA	NA	NA	NA	NA	NA	NA
TRINITY_DN15302_c4_g1	nsy:104230654	62.4	4e-184	-	methylmalonate-semialdehyde dehydrogenase [acylating]	K00140	malonate-semialdehyde dehydrogenase (acetylating) / methylmalonate-semialdehyde dehydrogenase	EC:1.2.1.18 1.2.1.27	nsy00640	Propanoate metabolism	Metabolism	Carbohydrate metabolism
TRINITY_DN15302_c4_g1	nsy:104230654	62.4	4e-184	-	methylmalonate-semialdehyde dehydrogenase [acylating]	K00140	malonate-semialdehyde dehydrogenase (acetylating) / methylmalonate-semialdehyde dehydrogenase	EC:1.2.1.18 1.2.1.27	nsy00562	Inositol phosphate metabolism	Metabolism	Carbohydrate metabolism
TRINITY_DN15302_c4_g1	nsy:104230654	62.4	4e-184	-	methylmalonate-semialdehyde dehydrogenase [acylating]	K00140	malonate-semialdehyde dehydrogenase (acetylating) / methylmalonate-semialdehyde dehydrogenase	EC:1.2.1.18 1.2.1.27	nsy00280	Valine, leucine and isoleucine degradation	Metabolism	Amino acid metabolism
TRINITY_DN15302_c4_g1	nsy:104230654	62.4	4e-184	-	methylmalonate-semialdehyde dehydrogenase [acylating]	K00140	malonate-semialdehyde dehydrogenase (acetylating) / methylmalonate-semialdehyde dehydrogenase	EC:1.2.1.18 1.2.1.27	nsy00410	beta-Alanine metabolism	Metabolism	Metabolism of other amino acids
TRINITY_DN15305_c1_g2	bvg:104894170	47.4	4.2e-60	NA	NA	NA	NA	NA	NA	NA	NA	NA
TRINITY_DN15307_c3_g2	ota:OT_ostta03g01470	68.9	4.2e-221	NA	NA	NA	NA	NA	NA	NA	NA	NA
TRINITY_DN15309_c1_g2	osa:4333075	32.7	8.3e-16	NA	NA	NA	NA	NA	NA	NA	NA	NA
TRINITY_DN15309_c1_g6	lang:109331942	50.2	4.1e-67	-	L-galactose dehydrogenase	K17744	L-galactose dehydrogenase	EC:1.1.1.316	lang00053	Ascorbate and aldarate metabolism	Metabolism	Carbohydrate metabolism
TRINITY_DN15310_c0_g3	gsl:Gasu_11930	44.5	1.6e-144	NA	NA	NA	NA	NA	NA	NA	NA	NA
TRINITY_DN15311_c2_g1	brp:103863146	47.7	7.5e-18	NA	NA	NA	NA	NA	NA	NA	NA	NA
TRINITY_DN15311_c2_g2	vcn:VOLCADRAFT_59590	65.1	7.7e-108	NA	NA	NA	NA	NA	NA	NA	NA	NA
TRINITY_DN15314_c3_g2	apro:F751_6172	29.6	8.9e-39	-	ABC transporter G family member 2	K05681	ATP-binding cassette, subfamily G (WHITE), member 2	-	apro02010	ABC transporters	Environmental Information Processing	Membrane transport
TRINITY_DN15314_c3_g3	ccp:CHC_T00009203001	39.7	9.5e-19	NA	NA	NA	NA	NA	NA	NA	NA	NA
TRINITY_DN15314_c3_g4	mcha:111004801	46.6	2.2e-105	-	squalene monooxygenase-like	K00511	squalene monooxygenase	EC:1.14.14.17	mcha00100	Steroid biosynthesis	Metabolism	Lipid metabolism
TRINITY_DN15314_c3_g4	mcha:111004801	46.6	2.2e-105	-	squalene monooxygenase-like	K00511	squalene monooxygenase	EC:1.14.14.17	mcha00909	Sesquiterpenoid and triterpenoid biosynthesis	Metabolism	Metabolism of terpenoids and polyketides
TRINITY_DN15325_c0_g4	sita:101772181	30.6	8.8e-26	NA	NA	NA	NA	NA	NA	NA	NA	NA
TRINITY_DN15327_c0_g6	cvr:CHLNCDRAFT_36764	43	6.3e-55	NA	NA	NA	NA	NA	NA	NA	NA	NA
TRINITY_DN15328_c0_g1	smo:SELMODRAFT_166276	29.2	2.4e-29	NA	NA	NA	NA	NA	NA	NA	NA	NA
TRINITY_DN15329_c0_g1	ota:OT_ostta05g02280	66.5	4.7e-59	-	Small GTPase superfamily	K07901	Ras-related protein Rab-8A	-	ota04144	Endocytosis	Cellular Processes	Transport and catabolism
TRINITY_DN15329_c0_g4	smo:SELMODRAFT_439569	49.2	2.5e-199	-	hypothetical protein	K02212	DNA replication licensing factor MCM4	EC:3.6.4.12	smo03030	DNA replication	Genetic Information Processing	Replication and repair
TRINITY_DN15331_c0_g1	vcn:VOLCADRAFT_108270	37.4	1.4e-44	NA	NA	NA	NA	NA	NA	NA	NA	NA
TRINITY_DN15331_c0_g2	vcn:VOLCADRAFT_108270	34.1	2.2e-94	NA	NA	NA	NA	NA	NA	NA	NA	NA
TRINITY_DN15332_c0_g1	cpap:110820972	26.9	1.4e-09	NA	NA	NA	NA	NA	NA	NA	NA	NA
TRINITY_DN15335_c0_g1	cme:CYME_CMS125C	68.4	1.2e-154	-	alcohol dehydrogenase class III	K00121	S-(hydroxymethyl)glutathione dehydrogenase / alcohol dehydrogenase	EC:1.1.1.284 1.1.1.1	cme00010	Glycolysis / Gluconeogenesis	Metabolism	Carbohydrate metabolism
TRINITY_DN15335_c0_g1	cme:CYME_CMS125C	68.4	1.2e-154	-	alcohol dehydrogenase class III	K00121	S-(hydroxymethyl)glutathione dehydrogenase / alcohol dehydrogenase	EC:1.1.1.284 1.1.1.1	cme00071	Fatty acid degradation	Metabolism	Lipid metabolism
TRINITY_DN15335_c0_g1	cme:CYME_CMS125C	68.4	1.2e-154	-	alcohol dehydrogenase class III	K00121	S-(hydroxymethyl)glutathione dehydrogenase / alcohol dehydrogenase	EC:1.1.1.284 1.1.1.1	cme00350	Tyrosine metabolism	Metabolism	Amino acid metabolism
TRINITY_DN15336_c2_g2	bvg:104900648	43.3	7.1e-117	-	peroxisome biogenesis protein 6	K13339	peroxin-6	-	bvg04146	Peroxisome	Cellular Processes	Transport and catabolism
TRINITY_DN15337_c2_g1	ccp:CHC_T00008907001	48.1	1.8e-56	-	Ethanolamine-phosphate cytidylyltransferase	K00967	ethanolamine-phosphate cytidylyltransferase	EC:2.7.7.14	ccp00564	Glycerophospholipid metabolism	Metabolism	Lipid metabolism
TRINITY_DN15337_c2_g1	ccp:CHC_T00008907001	48.1	1.8e-56	-	Ethanolamine-phosphate cytidylyltransferase	K00967	ethanolamine-phosphate cytidylyltransferase	EC:2.7.7.14	ccp00440	Phosphonate and phosphinate metabolism	Metabolism	Metabolism of other amino acids
TRINITY_DN15339_c0_g2	ccp:CHC_T00009537001	45	1e-51	NA	NA	NA	NA	NA	NA	NA	NA	NA
[truncated: 3,726 more rows]
