# Supplementary material for: Freshwater sponge hosts and their green algae symbionts: a tractable model to understand intracellular symbiosis
Source: PeerJ. 2021 Feb 11;9:e10654. doi: 10.7717/peerj.10654 (PMC7882143; doi:10.7717/peerj.10654)
Supplement: Supplemental Information 16 [file peerj-09-10654-s016.xlsx]

## Sheet: Sheet1
Query	Pfam_hit	Pfam_description	Pfam_identity	Pfam_evalue
TRINITY_DN10001_c0_g1	W4Y9Q7_STRPU/368-689	W4Y9Q7.1 PF02137.16;A_deamin;	34.8	3.4e-42
TRINITY_DN10007_c0_g1	F6GSQ2_VITVI/17-97	F6GSQ2.1 PF03951.17;Gln-synt_N;	88.5	4e-26
TRINITY_DN10028_c0_g1	I1FRI7_AMPQE/5-178	I1FRI7.1 PF00071.20;Ras;	83.3	2.2e-84
TRINITY_DN10034_c0_g1	G8A187_MEDTR/17-119	G8A187.1 PF00318.18;Ribosomal_S2;	97.4	2e-36
TRINITY_DN10047_c0_g1	W4XHB2_STRPU/438-532	W4XHB2.1 PF04800.10;ETC_C1_NDUFA4;	63	1e-28
TRINITY_DN10049_c0_g1	M7BCG7_CHEMY/100-245	M7BCG7.1 PF00005.25;ABC_tran;	77.4	1.4e-61
TRINITY_DN10051_c0_g1	A7RN57_NEMVE/2-76	A7RN57.1 PF03671.12;Ufm1;	93.3	1.7e-32
TRINITY_DN10058_c0_g1	I1FXD5_AMPQE/290-453	I1FXD5.1 PF13489.4;Methyltransf_23;	45.6	2.7e-31
TRINITY_DN10059_c0_g1	ADE_VIBPA/7-326	Q87GM3.1 PF00962.20;A_deaminase;	56.4	2.7e-30
TRINITY_DN10059_c0_g2	V2VYC4_9GAMM/9-328	V2VYC4.1 PF00962.20;A_deaminase;	54.5	4.9e-57
TRINITY_DN10081_c0_g2	H5WVF0_9BURK/484-604	H5WVF0.1 PF03764.16;EFG_IV;	95.5	2.5e-29
TRINITY_DN10087_c0_g1	K1QDD8_CRAGI/80-197	K1QDD8.1 PF13815.4;Dzip-like_N;	64.6	6.9e-11
TRINITY_DN10098_c0_g1	H5UT86_9MICO/7-351	H5UT86.1 PF01494.17;FAD_binding_3;	37	2.6e-58
TRINITY_DN10109_c0_g1	A0A0N1LK65_9CAUL/9-190	A0A0N1LK65.1 PF13410.4;GST_C_2;	49.5	6.6e-35
TRINITY_DN10122_c0_g1	K1QZW0_CRAGI/103-172	K1QZW0.1 PF00076.20;RRM_1;	84.3	8.1e-29
TRINITY_DN10136_c0_g1	I1G695_AMPQE/27-217	I1G695.1 PF01145.23;Band_7;	80.6	5e-83
TRINITY_DN10141_c0_g1	E9HVP5_DAPPU/1-130	E9HVP5.1 PF00334.17;NDK;	76.9	2.3e-55
TRINITY_DN10144_c0_g1	I1FMZ6_AMPQE/78-200	I1FMZ6.1 PF00329.17;Complex1_30kDa;	78.9	7.3e-55
TRINITY_DN10145_c0_g1	V3ZZH9_LOTGI/9-440	V3ZZH9.1 PF05577.10;Peptidase_S28;	47.8	6.2e-107
TRINITY_DN10188_c0_g1	I1G5E4_AMPQE/4-74	I1G5E4.1 PF00076.20;RRM_1;	78.9	2e-27
TRINITY_DN10200_c0_g1	H0ZN12_TAEGU/75-139	H0ZN12.1 PF00462.22;Glutaredoxin;	70.8	2.1e-22
TRINITY_DN10201_c0_g1	I1EJW6_AMPQE/34-308	I1EJW6.1 PF01459.20;Porin_3;	51.6	4.2e-79
TRINITY_DN10201_c0_g2	I1FWU6_AMPQE/88-184	I1FWU6.1 PF01196.17;Ribosomal_L17;	59.8	6.5e-27
TRINITY_DN10204_c0_g1	A0A0J7KXK7_LASNI/59-118	A0A0J7KXK7.1 PF00013.27;KH_1;	82.1	1.4e-18
TRINITY_DN10208_c0_g1	W4XJ06_STRPU/39-163	W4XJ06.1 PF10218.7;DUF2054;	41.3	5e-23
TRINITY_DN10209_c0_g1	I1FNA5_AMPQE/68-202	I1FNA5.1 PF00043.23;GST_C;	51.5	8.2e-35
TRINITY_DN10214_c0_g2	I1GAX2_AMPQE/130-276	I1GAX2.1 PF03564.13;DUF1759;	55.1	2.6e-35
TRINITY_DN10222_c0_g1	I1FQ42_AMPQE/107-322	I1FQ42.1 PF13672.4;PP2C_2;	51.8	6.7e-47
TRINITY_DN10230_c0_g1	LCLT1_DANRE/65-224	Q6NYV8.1 PF01553.19;Acyltransferase;	49.7	4.1e-40
TRINITY_DN10241_c0_g1	I1FXS5_AMPQE/31-232	I1FXS5.1 PF01712.17;dNK;	60.4	1.9e-72
TRINITY_DN10252_c0_g1	EST3A_MOUSE/35-547	Q63880.2 PF00135.26;COesterase;	100	1e-37
TRINITY_DN10253_c0_g1	I1FCC9_AMPQE/34-71	I1FCC9.1 PF09337.8;zf-H2C2;	60.5	1.2e-06
TRINITY_DN10275_c0_g1	Q1AL73_CHLSB/14-460	Q1AL73.1 PF00115.18;COX1;	85.5	7.3e-215
TRINITY_DN10275_c1_g1	Q1AL73_CHLSB/14-460	Q1AL73.1 PF00115.18;COX1;	85.1	4.5e-61
TRINITY_DN10289_c0_g1	I1FUS8_AMPQE/105-254	I1FUS8.1 PF02544.14;Steroid_dh;	62.4	2.9e-52
TRINITY_DN10341_c0_g4	W4ZAU7_STRPU/11-81	W4ZAU7.1 PF06645.11;SPC12;	66.2	4.7e-24
TRINITY_DN10347_c0_g1	I1M396_SOYBN/28-74	I1M396.1 PF00304.18;Gamma-thionin;	95.7	5.7e-23
TRINITY_DN10352_c0_g1	I1FPF2_AMPQE/99-204	I1FPF2.1 PF12456.6;hSac2;	55.1	1.3e-23
TRINITY_DN10369_c0_g1	V4CRM0_LOTGI/9-292	V4CRM0.1 PF00069.23;Pkinase;	61.5	1.4e-21
TRINITY_DN10371_c0_g1	H2QD29_PANTR/4-215	H2QD29.1 PF00091.23;Tubulin;	84.4	1.9e-102
TRINITY_DN10380_c0_g1	I1EX92_AMPQE/5-173	I1EX92.1 PF01965.22;DJ-1_PfpI;	73.4	2.4e-60
TRINITY_DN10387_c0_g1	I1FDJ0_AMPQE/81-228	I1FDJ0.1 PF14240.4;YHYH;	56.8	3.9e-07
TRINITY_DN10394_c0_g1	I1G9L9_AMPQE/89-208	I1G9L9.1 PF11712.6;Vma12;	44.2	2.5e-18
TRINITY_DN10396_c0_g4	J0DZR7_LOALO/272-600	J0DZR7.1 PF00225.21;Kinesin;	89.4	1.6e-16
TRINITY_DN10398_c0_g1	A0A067L5S7_JATCU/85-314	A0A067L5S7.1 PF00182.17;Glyco_hydro_19;	81.1	1e-10
TRINITY_DN10413_c0_g1	I1GIS9_AMPQE/34-286	I1GIS9.1 PF00069.23;Pkinase;	74.3	6.8e-112
TRINITY_DN10420_c0_g1	A0A0D9X8D6_9ORYZ/65-577	A0A0D9X8D6.1 PF00176.21;SNF2_N;	61	6.8e-22
TRINITY_DN10448_c0_g1	W5N808_LEPOC/6-199	W5N808.1 PF00106.23;adh_short;	54.5	2.7e-09
TRINITY_DN10458_c0_g1	Q1D3T2_MYXXD/57-348	Q1D3T2.1 PF01547.23;SBP_bac_1;	30.3	4.2e-23
TRINITY_DN10475_c0_g1	A0A0E0BVG0_9ORYZ/2-57	A0A0E0BVG0.1 PF08267.10;Meth_synt_1;	86.8	7.8e-08
TRINITY_DN10475_c0_g4	A0A058ZRH7_EUCGR/2-318	A0A058ZRH7.1 PF08267.10;Meth_synt_1;	91.4	4.8e-24
TRINITY_DN10487_c0_g2	I1FTQ7_AMPQE/10-169	I1FTQ7.1 PF05404.10;TRAP-delta;	40.9	1.5e-32
TRINITY_DN10493_c0_g1	C3Z127_BRAFL/108-378	C3Z127.1 PF03629.16;SASA;	46.2	2.3e-73
TRINITY_DN10502_c0_g1	I1G432_AMPQE/22-118	I1G432.1 PF02174.15;IRS;	51.6	3e-22
TRINITY_DN10512_c0_g1	I1G160_AMPQE/5-130	I1G160.1 PF00410.17;Ribosomal_S8;	82	1.2e-54
TRINITY_DN10519_c0_g1	I1FM88_AMPQE/66-158	I1FM88.1 PF00428.17;Ribosomal_60s;	74.4	2.7e-10
TRINITY_DN10522_c0_g1	F2U967_SALR5/6-187	F2U967.1 PF02737.16;3HCDH_N;	58.3	1.5e-50
TRINITY_DN10524_c0_g2	I1GDT2_AMPQE/52-506	I1GDT2.1 PF00225.21;Kinesin;	59.2	6e-45
TRINITY_DN10524_c0_g3	V3ZE20_LOTGI/39-452	V3ZE20.1 PF00225.21;Kinesin;	33.8	4.2e-37
TRINITY_DN10549_c0_g1	W5J5M8_ANODA/2-515	W5J5M8.1 PF10268.7;Tmemb_161AB;	50	4.7e-06
TRINITY_DN10579_c0_g1	H8KTJ7_SOLCM/17-152	H8KTJ7.1 PF01565.21;FAD_binding_4;	45.5	5.5e-25
TRINITY_DN10579_c0_g2	S2KCX0_MUCC1/193-451	S2KCX0.1 PF04030.12;ALO;	35.4	3.6e-19
TRINITY_DN10582_c0_g4	LT_SV40/136-229	P03070.2 PF02217.14;T_Ag_DNA_bind;	100	5.2e-13
TRINITY_DN10583_c0_g1	A0A096M7W1_POEFO/11-174	A0A096M7W1.1 PF00929.22;RNase_T;	62.8	6.5e-59
TRINITY_DN10586_c0_g1	A7SFI9_NEMVE/1-175	A7SFI9.1 PF03657.11;UPF0113;	76	7.9e-76
TRINITY_DN1059_c0_g1	G3H5I7_CRIGR/174-428	G3H5I7.1 PF00147.16;Fibrinogen_C;	95.8	1.7e-06
TRINITY_DN10609_c0_g1	I1FIM8_AMPQE/257-377	I1FIM8.1 PF00380.17;Ribosomal_S9;	64.5	1e-36
TRINITY_DN10615_c0_g1	I1MEL3_SOYBN/7-117	I1MEL3.1 PF05564.10;Auxin_repressed;	88.2	6e-21
TRINITY_DN10620_c0_g1	B0M1A1_SOYBN/21-552	B0M1A1.1 PF00463.19;ICL;	97.5	8.5e-108
TRINITY_DN10623_c0_g1	C3XWK4_BRAFL/8-214	C3XWK4.1 PF01088.19;Peptidase_C12;	54.1	1e-60
TRINITY_DN10631_c0_g1	V4AYK3_LOTGI/26-123	V4AYK3.1 PF03645.11;Tctex-1;	63.3	8.7e-31
TRINITY_DN10637_c0_g1	I1GH06_AMPQE/34-113	I1GH06.1 PF04505.10;CD225;	48.5	1.7e-10
TRINITY_DN10640_c0_g1	M7BTT3_CHEMY/237-493	M7BTT3.1 PF07992.12;Pyr_redox_2;	38.9	2.8e-36
TRINITY_DN10645_c0_g1	A7SK73_NEMVE/110-251	A7SK73.1 PF08294.9;TIM21;	48.5	1.2e-11
TRINITY_DN10646_c0_g1	I1G5H1_AMPQE/5-124	I1G5H1.1 PF06212.10;GRIM-19;	64.4	9.6e-36
TRINITY_DN10656_c0_g1	V3ZVB1_LOTGI/29-235	V3ZVB1.1 PF01680.15;SOR_SNZ;	81.2	3e-87
TRINITY_DN10657_c0_g1	I1FSA4_AMPQE/330-410	I1FSA4.1 PF00178.20;Ets;	91.4	7.8e-38
TRINITY_DN10658_c0_g1	A0A0D2VNN6_CAPO3/150-248	A0A0D2VNN6.1 PF01248.24;Ribosomal_L7Ae;	78.8	1.3e-30
TRINITY_DN10661_c0_g2	A7SD29_NEMVE/4-1032	A7SD29.1 PF02463.17;SMC_N;	64.4	4.6e-57
TRINITY_DN10669_c0_g1	I1GAS4_AMPQE/87-562	I1GAS4.1 PF01055.24;Glyco_hydro_31;	53.2	2.1e-160
TRINITY_DN1066_c0_g1	B1A9Y7_AMPQE/67-135	B1A9Y7.1 PF00505.17;HMG_box;	88.4	2.8e-29
TRINITY_DN10671_c0_g1	A0A0A0LUC5_CUCSA/27-558	A0A0A0LUC5.1 PF01274.20;Malate_synthase;	100	2.5e-36
TRINITY_DN10671_c0_g2	I1MUM7_SOYBN/26-557	I1MUM7.1 PF01274.20;Malate_synthase;	92.3	9.7e-83
TRINITY_DN10672_c0_g1	H2YGR1_CIOSA/13-78	H2YGR1.1 PF00076.20;RRM_1;	62.5	2.1e-14
TRINITY_DN10674_c0_g1	I1FGM6_AMPQE/710-889	I1FGM6.1 PF00270.27;DEAD;	77.2	2.4e-76
TRINITY_DN10697_c0_g2	V7CZL3_PHAVU/4-139	V7CZL3.1 PF03952.14;Enolase_N;	95.2	2e-25
TRINITY_DN10711_c0_g1	I1GLJ7_BRADI/10-571	I1GLJ7.1 PF00012.18;HSP70;	100	1.6e-26
TRINITY_DN10711_c0_g3	A0A078IS30_BRANA/9-618	A0A078IS30.1 PF00012.18;HSP70;	95.5	1.3e-28
TRINITY_DN10718_c0_g1	H3G9F8_PHYRM/463-692	H3G9F8.1 PF05843.12;Suf;	51.6	3.5e-56
TRINITY_DN10724_c0_g2	I1FUT2_AMPQE/47-217	I1FUT2.1 PF01145.23;Band_7;	83.8	9.4e-70
TRINITY_DN10726_c0_g1	V4B592_LOTGI/146-235	V4B592.1 PF00153.25;Mito_carr;	73.3	8.2e-30
TRINITY_DN10729_c0_g1	A7SNL5_NEMVE/101-228	A7SNL5.1 PF01569.19;PAP2;	60.2	3.5e-34
TRINITY_DN10730_c0_g2	C3ZYN9_BRAFL/140-318	C3ZYN9.1 PF06918.12;DUF1280;	55.7	2.1e-16
TRINITY_DN10734_c0_g1	G7IMZ3_MEDTR/1-154	G7IMZ3.1 PF00407.17;Bet_v_1;	61	4e-48
TRINITY_DN1073_c0_g1	W7TT65_9STRA/41-307	W7TT65.1 PF00685.25;Sulfotransfer_1;	33	3.3e-28
TRINITY_DN10741_c0_g1	A7SJ21_NEMVE/231-327	A7SJ21.1 PF13864.4;Enkurin;	65.9	1.4e-25
TRINITY_DN10755_c0_g1	I1FY46_AMPQE/10-46	I1FY46.1 PF06842.10;DUF1242;	81.1	1e-08
TRINITY_DN10759_c0_g2	I1GIT8_AMPQE/5-93	I1GIT8.1 PF00125.22;Histone;	98.9	7.8e-40
TRINITY_DN10762_c0_g1	W4XT50_STRPU/7-127	W4XT50.1 PF07542.9;ATP12;	51.2	5.7e-31
TRINITY_DN10768_c0_g1	J9JYY0_ACYPI/27-195	J9JYY0.1 PF00043.23;GST_C;	53.9	3.7e-46
TRINITY_DN10794_c0_g1	H3FXV4_PRIPA/12-281	H3FXV4.1 PF02263.17;GBP;	39.1	1.1e-06
TRINITY_DN10795_c0_g1	D8LU94_ECTSI/82-277	D8LU94.1 PF11715.6;Nup160;	33	4.9e-32
TRINITY_DN10804_c0_g1	I1GHF4_AMPQE/67-534	I1GHF4.1 PF11957.6;efThoc1;	54.3	3.7e-138
TRINITY_DN10810_c0_g1	I1FM81_AMPQE/30-204	I1FM81.1 PF00753.25;Lactamase_B;	58.6	1.4e-51
TRINITY_DN10820_c0_g1	H3AC43_LATCH/61-324	H3AC43.1 PF01940.14;DUF92;	52.8	7.4e-46
TRINITY_DN10829_c0_g1	J2LEW4_9BURK/9-72	J2LEW4.1 PF00137.19;ATP-synt_C;	100	1.4e-25
TRINITY_DN10830_c0_g2	I1G903_AMPQE/1-374	I1G903.1 PF05631.12;MFS_5;	49.6	5.8e-70
TRINITY_DN10833_c0_g1	Q4PM81_IXOSC/18-93	Q4PM81.1 PF00935.17;Ribosomal_L44;	86.8	4.6e-30
TRINITY_DN10852_c0_g3	A7S6P8_NEMVE/1-81	A7S6P8.1 PF02823.14;ATP-synt_DE_N;	67.9	1.2e-24
TRINITY_DN10859_c0_g1	I1GHX8_AMPQE/39-191	I1GHX8.1 PF01509.16;TruB_N;	85.2	7.2e-06
TRINITY_DN10862_c0_g2	B0W5N9_CULQU/44-489	B0W5N9.1 PF05602.10;CLPTM1;	64.1	9.9e-65
TRINITY_DN10862_c0_g3	I1FU91_AMPQE/34-328	I1FU91.1 PF05602.10;CLPTM1;	46.3	9.5e-64
TRINITY_DN10864_c0_g1	H3DJY4_TETNG/159-339	H3DJY4.1 PF04194.11;PDCD2_C;	44.6	2.9e-33
TRINITY_DN10868_c0_g1	A0A087SN85_AUXPR/58-122	A0A087SN85.1 PF00333.18;Ribosomal_S5;	97.6	2e-13
TRINITY_DN10876_c0_g2	CCMC_ARATH/1-175	P92527.4 PF01578.18;Cytochrom_C_asm;	96.9	2.3e-29
TRINITY_DN10884_c0_g1	A7T131_NEMVE/187-525	A7T131.1 PF03372.21;Exo_endo_phos;	58.4	8.1e-108
TRINITY_DN10895_c0_g1	I1FZW0_AMPQE/34-126	I1FZW0.1 PF02174.15;IRS;	35.8	5.9e-06
TRINITY_DN108_c0_g1	B4HJW4_DROSE/599-663	B4HJW4.1 PF00536.28;SAM_1;	43.8	1.7e-07
TRINITY_DN10912_c0_g3	B3S5U2_TRIAD/16-77	B3S5U2.1 PF00226.29;DnaJ;	66.1	2e-15
TRINITY_DN10921_c0_g1	UBE2S_BRAFL/17-154	C3Z724.1 PF00179.24;UQ_con;	77.5	5e-61
TRINITY_DN10945_c0_g1	E9HM72_DAPPU/23-156	E9HM72.1 PF04145.13;Ctr;	35.3	8.7e-09
TRINITY_DN10961_c0_g2	I1G770_AMPQE/8-319	I1G770.1 PF02423.13;OCD_Mu_crystall;	51.3	9.9e-80
TRINITY_DN10969_c0_g2	I1ESM0_AMPQE/27-292	I1ESM0.1 PF12017.6;Tnp_P_element;	51.9	6.5e-08
TRINITY_DN10972_c0_g1	T1IPK6_STRMM/24-217	T1IPK6.1 PF02545.12;Maf;	54.7	1.1e-22
TRINITY_DN10973_c0_g2	H5WNY5_9BURK/38-230	H5WNY5.1 PF06764.9;DUF1223;	39.3	3.8e-21
TRINITY_DN10975_c1_g1	A7RN38_NEMVE/5-105	A7RN38.1 PF00153.25;Mito_carr;	81.2	3e-40
TRINITY_DN10977_c0_g1	I1NFS4_SOYBN/90-156	I1NFS4.1 PF02874.21;ATP-synt_ab_N;	94.4	3.5e-21
TRINITY_DN10978_c0_g1	I1FMX3_AMPQE/35-161	I1FMX3.1 PF02221.13;E1_DerP2_DerF2;	42.5	2.4e-20
TRINITY_DN1097_c0_g1	I1FZI0_AMPQE/86-337	I1FZI0.1 PF00561.18;Abhydrolase_1;	39.7	2.8e-54
TRINITY_DN10982_c0_g1	V7BFF7_PHAVU/72-305	V7BFF7.1 PF01946.15;Thi4;	98	8.5e-51
TRINITY_DN10987_c0_g1	I1FLW1_AMPQE/70-149	I1FLW1.1 PF00312.20;Ribosomal_S15;	87.5	1.3e-30
TRINITY_DN11019_c0_g1	A0A0D2T6A5_GOSRA/46-177	A0A0D2T6A5.1 PF00125.22;Histone;	93.9	2e-61
TRINITY_DN11026_c0_g1	G3PMB7_GASAC/9-181	G3PMB7.1 PF00025.19;Arf;	52.4	7.9e-47
TRINITY_DN11031_c0_g2	I1F6Z4_AMPQE/1-101	I1F6Z4.1 PF09799.7;Transmemb_17;	63	2.6e-25
TRINITY_DN11059_c0_g1	M0U714_MUSAM/33-185	M0U714.1 PF00071.20;Ras;	90.7	7.7e-14
TRINITY_DN1105_c0_g2	I1GJI4_AMPQE/7-180	I1GJI4.1 PF00025.19;Arf;	60	1.6e-32
TRINITY_DN11071_c0_g1	I1FA40_AMPQE/117-401	I1FA40.1 PF03283.11;PAE;	37	2.7e-30
TRINITY_DN11073_c1_g1	I1G6N3_AMPQE/12-122	I1G6N3.1 PF02064.13;MAS20;	55	4e-27
TRINITY_DN11092_c0_g1	I1F8F0_AMPQE/59-240	I1F8F0.1 PF05527.9;DUF758;	57.7	1.9e-54
TRINITY_DN11101_c0_g1	B7PB60_IXOSC/10-136	B7PB60.1 PF00583.23;Acetyltransf_1;	72	3.7e-48
TRINITY_DN11108_c0_g1	I1G5S1_AMPQE/12-171	I1G5S1.1 PF00071.20;Ras;	37	6.4e-20
TRINITY_DN11112_c0_g1	I1JQZ6_SOYBN/101-336	I1JQZ6.1 PF00112.21;Peptidase_C1;	96.9	5.2e-31
TRINITY_DN11114_c0_g2	A0A084QFF1_9HYPO/8-64	A0A084QFF1.1 PF00043.23;GST_C;	53.7	6.3e-07
TRINITY_DN11114_c0_g3	T1ERY4_HELRO/137-221	T1ERY4.1 PF00736.17;EF1_GNE;	82.4	2.6e-33
TRINITY_DN11114_c0_g5	I3IZX1_ORENI/161-264	I3IZX1.1 PF01739.16;CheR;	51.2	1.9e-15
TRINITY_DN11155_c0_g1	G3I2X1_CRIGR/18-189	G3I2X1.1 PF05018.11;DUF667;	99.2	4e-70
TRINITY_DN11161_c0_g1	I1FAX9_AMPQE/82-243	I1FAX9.1 PF08645.9;PNK3P;	66.7	7.5e-61
TRINITY_DN11164_c0_g3	I1GJ76_AMPQE/2-191	I1GJ76.1 PF00827.15;Ribosomal_L15e;	76.3	1.4e-83
TRINITY_DN11164_c0_g4	H2Z2B0_CIOSA/209-307	H2Z2B0.1 PF06237.10;DUF1011;	41.3	9.2e-10
TRINITY_DN11169_c0_g1	H5WIQ3_9BURK/557-616	H5WIQ3.1 PF00013.27;KH_1;	97.5	2.5e-14
TRINITY_DN11171_c0_g1	F6UJI4_XENTR/5-81	F6UJI4.1 PF07297.10;DPM2;	48.7	5.5e-12
TRINITY_DN11206_c0_g1	I1EHV6_AMPQE/407-586	I1EHV6.1 PF07731.12;Cu-oxidase_2;	42.1	5.3e-29
TRINITY_DN11207_c0_g1	E9GUW1_DAPPU/10-175	E9GUW1.1 PF00071.20;Ras;	61.8	1.1e-30
TRINITY_DN11224_c0_g1	E4XSJ7_OIKDI/57-230	E4XSJ7.1 PF01145.23;Band_7;	32.3	5e-18
TRINITY_DN11232_c0_g1	H3D6D1_TETNG/21-51	H3D6D1.1 PF00397.24;WW;	71	6.2e-06
TRINITY_DN11250_c0_g1	W4XK40_STRPU/5-125	W4XK40.1 PF06110.9;DUF953;	50	1.4e-30
TRINITY_DN11251_c0_g1	I1FUJ0_AMPQE/257-381	I1FUJ0.1 PF04855.10;SNF5;	81.7	2.3e-53
TRINITY_DN11283_c0_g1	I1G1V0_AMPQE/12-104	I1G1V0.1 PF02214.20;BTB_2;	63.3	1.8e-28
TRINITY_DN11287_c0_g1	A7RSJ0_NEMVE/14-108	A7RSJ0.1 PF01900.17;RNase_P_Rpp14;	39.2	1e-11
TRINITY_DN11289_c0_g1	I1FKP7_AMPQE/8-103	I1FKP7.1 PF06294.9;CH_2;	66.7	1.7e-33
TRINITY_DN11296_c0_g1	W4XWW8_STRPU/30-273	W4XWW8.1 PF03372.21;Exo_endo_phos;	38.9	1.4e-10
TRINITY_DN11307_c0_g2	A0A0N1ADP1_9PROT/24-97	A0A0N1ADP1.1 PF02874.21;ATP-synt_ab_N;	98.5	8.7e-30
TRINITY_DN11309_c0_g1	V7ART1_PHAVU/12-89	V7ART1.1 PF00347.21;Ribosomal_L6;	95.1	3.3e-26
TRINITY_DN11311_c0_g2	I1G7R9_AMPQE/53-103	I1G7R9.1 PF00415.16;RCC1;	61.2	5.4e-11
TRINITY_DN11338_c2_g1	I1G460_AMPQE/72-153	I1G460.1 PF04969.14;CS;	47.9	8.3e-10
TRINITY_DN11344_c0_g1	A9JTJ5_XENTR/7-613	A9JTJ5.1 PF00012.18;HSP70;	51.7	2.1e-146
TRINITY_DN11353_c1_g1	A0A0D2NVK0_GOSRA/5-110	A0A0D2NVK0.1 PF00179.24;UQ_con;	98.3	2.4e-28
TRINITY_DN11353_c1_g2	A0A0A0K9B9_CUCSA/45-182	A0A0A0K9B9.1 PF00179.24;UQ_con;	92.9	8.2e-24
TRINITY_DN11354_c1_g1	F1PFU6_CANLF/66-274	F1PFU6.2 PF13621.4;Cupin_8;	58.8	7.9e-45
TRINITY_DN11369_c0_g1	I1FBP9_AMPQE/19-161	I1FBP9.1 PF08718.9;GLTP;	59.4	1.4e-45
TRINITY_DN11370_c0_g1	I1FK23_AMPQE/225-355	I1FK23.1 PF01082.18;Cu2_monooxygen;	41.1	4.7e-19
TRINITY_DN11373_c0_g1	I1GF31_AMPQE/193-324	I1GF31.1 PF00782.18;DSPc;	49.6	8e-33
TRINITY_DN11376_c0_g1	C3YWT2_BRAFL/215-414	C3YWT2.1 PF10469.7;AKAP7_NLS;	34.7	2.1e-28
TRINITY_DN11379_c0_g1	A0A0M3AGZ8_9SPHN/9-370	A0A0M3AGZ8.1 PF01494.17;FAD_binding_3;	33.6	2.3e-48
TRINITY_DN11379_c0_g2	U3INN6_ANAPL/170-316	U3INN6.1 PF13602.4;ADH_zinc_N_2;	38.4	2.2e-13
TRINITY_DN1137_c0_g1	D6W7Y2_TRICA/37-365	D6W7Y2.1 PF03016.13;Exostosin;	47.5	6.1e-34
TRINITY_DN11385_c0_g1	I1GC85_AMPQE/121-336	I1GC85.1 PF00112.21;Peptidase_C1;	57.5	2.3e-69
TRINITY_DN11391_c0_g1	T1FNS5_HELRO/106-322	T1FNS5.1 PF01027.18;Bax1-I;	50.9	7.4e-49
TRINITY_DN11394_c0_g1	A0A088ADS7_APIME/2-50	A0A088ADS7.1 PF04627.11;ATP-synt_Eps;	61.7	1.5e-09
TRINITY_DN11394_c0_g2	I1GBV1_AMPQE/20-92	I1GBV1.1 PF16093.3;PAC4;	43.1	2.8e-12
TRINITY_DN11396_c0_g1	I1E7E9_AMPQE/1-67	I1E7E9.1 PF01248.24;Ribosomal_L7Ae;	85.1	3.1e-27
TRINITY_DN11399_c0_g2	I1FUN7_AMPQE/528-960	I1FUN7.1 PF03378.13;CAS_CSE1;	63.4	2.2e-151
TRINITY_DN11404_c0_g1	I1G7S0_AMPQE/66-163	I1G7S0.1 PF00338.20;Ribosomal_S10;	69.4	2.1e-32
TRINITY_DN11406_c1_g1	C3ZN22_BRAFL/1-56	C3ZN22.1 PF10262.7;Rdx;	54.9	9.5e-09
TRINITY_DN11424_c0_g1	I1G7R7_AMPQE/1246-1294	I1G7R7.1 PF00628.27;PHD;	85.7	2.1e-21
TRINITY_DN11429_c0_g1	T1HID7_RHOPR/481-697	T1HID7.1 PF00233.17;PDEase_I;	53.5	1.8e-15
TRINITY_DN11429_c1_g1	I1FFW2_AMPQE/84-192	I1FFW2.1 PF00578.19;AhpC-TSA;	35.1	4.3e-10
TRINITY_DN11442_c0_g1	I1FB00_AMPQE/54-150	I1FB00.1 PF07978.11;NIPSNAP;	59.8	5.6e-32
TRINITY_DN11450_c0_g1	I1FUE3_AMPQE/15-259	I1FUE3.1 PF02267.15;Rib_hydrolayse;	32.4	2e-25
TRINITY_DN11454_c0_g1	A0A0D2X1Y7_CAPO3/255-323	A0A0D2X1Y7.1 PF13517.4;VCBS;	58.3	2.4e-14
TRINITY_DN11461_c0_g1	A7RMB0_NEMVE/14-129	A7RMB0.1 PF03874.14;RNA_pol_Rpb4;	50.6	7.2e-14
TRINITY_DN11468_c0_g1	I1EU73_AMPQE/16-216	I1EU73.1 PF10277.7;Frag1;	41.9	4.3e-27
TRINITY_DN11468_c0_g2	W5KWS5_ASTMX/135-353	W5KWS5.1 PF10469.7;AKAP7_NLS;	39.5	2.2e-33
TRINITY_DN11474_c0_g2	F6ZVW0_MONDO/20-209	F6ZVW0.1 PF02330.14;MAM33;	27.5	2e-06
TRINITY_DN11478_c0_g2	I1GIX4_AMPQE/658-720	I1GIX4.1 PF00536.28;SAM_1;	37.1	7.6e-06
TRINITY_DN11484_c0_g1	C3ZKV5_BRAFL/2-209	C3ZKV5.1 PF12767.5;SAGA-Tad1;	31.1	1.3e-21
TRINITY_DN11487_c0_g3	I1F6P3_AMPQE/307-479	I1F6P3.1 PF03483.15;B3_4;	50.3	2.3e-38
TRINITY_DN11491_c0_g1	A7SD56_NEMVE/31-335	A7SD56.1 PF00291.23;PALP;	43.9	2.3e-73
TRINITY_DN11505_c0_g1	Q1AL73_CHLSB/14-460	Q1AL73.1 PF00115.18;COX1;	87.1	1.5e-27
TRINITY_DN11506_c0_g1	I1FZU2_AMPQE/13-215	I1FZU2.1 PF00106.23;adh_short;	74.4	6.1e-78
TRINITY_DN11521_c0_g1	I1GJE6_AMPQE/39-235	I1GJE6.1 PF02146.15;SIR2;	51.4	4.6e-71
TRINITY_DN11527_c0_g3	A0A0D2WT94_CAPO3/8-212	A0A0D2WT94.1 PF10277.7;Frag1;	43.6	1e-22
TRINITY_DN11540_c0_g1	I1N918_SOYBN/60-317	I1N918.2 PF05691.10;Raffinose_syn;	61.8	1.2e-08
TRINITY_DN11551_c0_g1	F7B859_MONDO/11-129	F7B859.1 PF01042.19;Ribonuc_L-PSP;	66.4	2e-37
TRINITY_DN11554_c0_g1	I1ET94_AMPQE/5-61	I1ET94.1 PF16699.3;CSTF1_dimer;	75	3e-14
TRINITY_DN11555_c0_g3	NU5M_PANTR/422-602	Q35648.1 PF06455.9;NADH5_C;	90.1	1e-24
TRINITY_DN11555_c0_g5	NU6M_PANTR/15-170	Q9T9V6.1 PF00499.18;Oxidored_q3;	94	1.9e-62
TRINITY_DN11555_c0_g6	CYB_MOUSE/18-204	P00158.1 PF00033.17;Cytochrome_B;	90.9	2.8e-88
TRINITY_DN11561_c0_g2	I1FJY2_AMPQE/94-281	I1FJY2.1 PF00907.20;T-box;	53.3	1.1e-15
TRINITY_DN11583_c0_g1	B7PRG9_IXOSC/18-60	B7PRG9.1 PF02150.14;RNA_POL_M_15KD;	79.1	2.9e-14
TRINITY_DN11591_c0_g2	C3Y261_BRAFL/14-142	C3Y261.1 PF00416.20;Ribosomal_S13;	82.2	8.6e-58
TRINITY_DN11592_c0_g1	H2QSV7_PANTR/18-212	H2QSV7.1 PF00687.19;Ribosomal_L1;	52.4	4e-71
TRINITY_DN11593_c0_g1	I3J3Y2_ORENI/5-241	I3J3Y2.1 PF05477.9;SURF2;	45	3.8e-21
TRINITY_DN1160_c0_g1	S9WFR9_9CETA/1-120	S9WFR9.1 PF00992.18;Troponin;	92.7	1.4e-19
TRINITY_DN11626_c0_g1	I1FAE3_AMPQE/116-219	I1FAE3.1 PF02777.16;Sod_Fe_C;	75	1.4e-44
TRINITY_DN11628_c0_g2	I1FBX7_AMPQE/19-151	I1FBX7.1 PF00237.17;Ribosomal_L22;	80	5.2e-54
TRINITY_DN11630_c0_g1	I1F355_AMPQE/1-66	I1F355.1 PF01246.18;Ribosomal_L24e;	48.3	6e-17
TRINITY_DN11630_c0_g2	I1G9H2_AMPQE/194-232	I1G9H2.1 PF00400.30;WD40;	94.9	9.4e-15
TRINITY_DN11631_c0_g1	K1R0R3_CRAGI/1-118	K1R0R3.1 PF01398.19;JAB;	68.4	9.7e-39
TRINITY_DN11632_c0_g1	U3JHD4_FICAL/77-252	U3JHD4.1 PF04427.16;Brix;	71.1	1.6e-55
TRINITY_DN11648_c0_g1	E4XFM6_OIKDI/11-81	E4XFM6.1 PF11976.6;Rad60-SLD;	76.1	1.2e-22
TRINITY_DN11648_c0_g2	H2RLE5_TAKRU/68-170	H2RLE5.1 PF00237.17;Ribosomal_L22;	51.5	5.7e-20
TRINITY_DN11651_c0_g1	I1G1T9_AMPQE/1-218	I1G1T9.1 PF01265.15;Cyto_heme_lyase;	82.4	2.7e-39
TRINITY_DN11652_c0_g2	D6WRL1_TRICA/80-211	D6WRL1.1 PF00080.18;Sod_Cu;	45.2	1.9e-26
TRINITY_DN11660_c0_g1	I1G7I0_AMPQE/3-299	I1G7I0.1 PF11945.6;WASH_WAHD;	62.4	3.1e-38
TRINITY_DN11660_c0_g3	I1G7I0_AMPQE/3-299	I1G7I0.1 PF11945.6;WASH_WAHD;	63	4.5e-33
TRINITY_DN11662_c0_g2	I1FMX6_AMPQE/26-257	I1FMX6.1 PF02854.17;MIF4G;	46.2	3.5e-39
TRINITY_DN11670_c0_g1	B9S1A9_RICCO/1-103	B9S1A9.1 PF00177.19;Ribosomal_S7;	91.7	3.7e-29
TRINITY_DN11670_c0_g2	RR12B_POPTR/2-135	A4GYN8.1 PF00164.23;Ribosom_S12_S23;	93.2	1.4e-31
TRINITY_DN11670_c0_g3	G7JFY2_MEDTR/14-186	G7JFY2.1 PF00146.19;NADHdh;	85.9	1.2e-28
TRINITY_DN11690_c0_g1	I1GBM5_AMPQE/6-134	I1GBM5.1 PF03311.12;Cornichon;	68.2	2.2e-44
TRINITY_DN11690_c0_g2	I1GBM7_AMPQE/14-142	I1GBM7.1 PF00241.18;Cofilin_ADF;	65.4	4.9e-41
TRINITY_DN11703_c0_g1	A0A088ABL2_APIME/97-233	A0A088ABL2.1 PF03947.16;Ribosomal_L2_C;	80.6	1.8e-45
TRINITY_DN11713_c0_g1	B3S6K3_TRIAD/20-232	B3S6K3.1 PF00710.18;Asparaginase;	53.6	2.7e-53
TRINITY_DN11727_c0_g1	H2ZNA5_CIOSA/10-111	H2ZNA5.1 PF01990.15;ATP-synt_F;	71.1	9.2e-07
TRINITY_DN11736_c0_g1	APOA2_MOUSE/24-98	P09813.2 PF04711.11;ApoA-II;	100	1.5e-34
TRINITY_DN11736_c0_g2	A0A0G2JSH5_RAT/414-592	A0A0G2JSH5.1 PF00273.18;Serum_albumin;	93.3	1.5e-93
TRINITY_DN11744_c0_g1	C7QCA9_CATAD/1-350	C7QCA9.1 PF00224.19;PK;	38.6	6.3e-50
TRINITY_DN11745_c0_g1	I1G2W7_AMPQE/18-129	I1G2W7.1 PF00169.27;PH;	34.8	7e-10
TRINITY_DN11748_c0_g1	W4Z603_STRPU/128-311	W4Z603.1 PF00078.25;RVT_1;	51.7	5.7e-11
TRINITY_DN11751_c0_g1	I1GBJ5_AMPQE/358-521	I1GBJ5.1 PF08648.10;DUF1777;	77.6	1e-13
TRINITY_DN11755_c0_g1	A0A0D9VG49_9ORYZ/1351-1495	A0A0D9VG49.1 PF00730.23;HhH-GPD;	47.7	2.9e-19
TRINITY_DN11759_c0_g1	H0VQ41_CAVPO/181-619	H0VQ41.1 PF05185.14;PRMT5;	58.6	9.1e-150
TRINITY_DN11763_c0_g1	G3PQ64_GASAC/10-280	G3PQ64.1 PF01073.17;3Beta_HSD;	56.4	6e-26
TRINITY_DN11765_c0_g2	RPOB_GLUOX/547-615	Q5FTX7.2 PF04565.14;RNA_pol_Rpb2_3;	93.8	4.8e-21
TRINITY_DN11769_c1_g2	C1KRI7_MICSR/128-398	C1KRI7.1 PF00346.17;Complex1_49kDa;	80.7	1.3e-77
TRINITY_DN11772_c0_g2	I1GG64_AMPQE/18-326	I1GG64.1 PF02274.15;Amidinotransf;	44.2	4.6e-72
TRINITY_DN11782_c0_g1	I1G793_AMPQE/246-343	I1G793.1 PF00530.16;SRCR;	46.7	4.9e-13
TRINITY_DN1178_c0_g1	I1FZT5_AMPQE/74-142	I1FZT5.1 PF00505.17;HMG_box;	92.8	5.9e-29
TRINITY_DN11797_c0_g1	H0ZEQ3_TAEGU/2-100	H0ZEQ3.1 PF11027.6;DUF2615;	43.8	9.2e-09
TRINITY_DN11803_c0_g2	T1IMN2_STRMM/101-289	T1IMN2.1 PF09756.7;DDRGK;	73.3	2.6e-30
TRINITY_DN11810_c0_g1	B3S2V7_TRIAD/46-97	B3S2V7.1 PF01084.18;Ribosomal_S18;	62.7	3.8e-09
TRINITY_DN11812_c0_g1	I1GHH3_AMPQE/2-69	I1GHH3.1 PF01781.16;Ribosomal_L38e;	81.2	2.2e-13
TRINITY_DN11816_c0_g2	A0A0D2VY71_CAPO3/75-389	A0A0D2VY71.1 PF01156.17;IU_nuc_hydro;	28.3	3.8e-17
TRINITY_DN11825_c0_g1	W6NGP0_HAECO/41-136	W6NGP0.1 PF03953.15;Tubulin_C;	67.4	2e-09
TRINITY_DN11833_c0_g1	I1G2V0_AMPQE/97-323	I1G2V0.1 PF02666.13;PS_Dcarbxylase;	38	3e-45
TRINITY_DN11840_c1_g1	E9GR88_DAPPU/35-170	E9GR88.1 PF00179.24;UQ_con;	77.2	2.3e-58
TRINITY_DN11843_c0_g1	V7B6Z4_PHAVU/11-358	V7B6Z4.1 PF00274.17;Glycolytic;	95.3	1.2e-42
TRINITY_DN11843_c0_g2	A0A0D2QBC2_GOSRA/11-358	A0A0D2QBC2.1 PF00274.17;Glycolytic;	92.6	3.9e-28
TRINITY_DN11844_c0_g1	F7B073_CIOIN/246-352	F7B073.2 PF14874.4;PapD-like;	36.5	5.4e-08
TRINITY_DN11855_c0_g3	W4YJC0_STRPU/13-69	W4YJC0.1 PF00076.20;RRM_1;	60.7	1.2e-14
TRINITY_DN11875_c0_g1	A7RP44_NEMVE/96-233	A7RP44.1 PF14811.4;TPD;	67.2	1.2e-53
TRINITY_DN11879_c0_g1	A0A0N4UQ43_DRAME/15-107	A0A0N4UQ43.1 PF00254.26;FKBP_C;	73.9	1.3e-33
TRINITY_DN11883_c0_g2	H2N0T9_ORYLA/42-185	H2N0T9.1 PF01553.19;Acyltransferase;	51.4	2.6e-38
TRINITY_DN11885_c0_g1	A7RF79_NEMVE/1-353	A7RF79.1 PF04502.11;DUF572;	70.3	2.1e-55
TRINITY_DN11893_c0_g1	A0A061FNF4_THECC/4-359	A0A061FNF4.1 PF00022.17;Actin;	100	1.4e-36
TRINITY_DN11893_c0_g2	M3XIJ4_LATCH/4-132	M3XIJ4.1 PF00022.17;Actin;	95.8	3.3e-49
TRINITY_DN11903_c0_g1	I1G309_AMPQE/65-166	I1G309.1 PF00168.28;C2;	56	4.4e-33
TRINITY_DN11916_c0_g1	I1GBD8_AMPQE/45-603	I1GBD8.1 PF00995.21;Sec1;	43.8	4.7e-128
TRINITY_DN11918_c0_g1	I1FC10_AMPQE/43-538	I1FC10.1 PF00118.22;Cpn60_TCP1;	77.5	1.6e-218
TRINITY_DN11920_c0_g1	I1EXP3_AMPQE/472-653	I1EXP3.1 PF06017.11;Myosin_TH1;	49.1	1.3e-40
TRINITY_DN11924_c0_g1	H2Z321_CIOSA/8-546	H2Z321.1 PF03098.13;An_peroxidase;	61	6.4e-24
TRINITY_DN11930_c0_g1	B3SAA6_TRIAD/8-60	B3SAA6.1 PF11717.6;Tudor-knot;	50.9	1.8e-07
TRINITY_DN1193_c0_g1	L9KLA3_TUPCH/13337-13424	L9KLA3.1 PF00041.19;fn3;	97.4	5.3e-15
TRINITY_DN11951_c0_g1	A0A075AV78_9FUNG/154-274	A0A075AV78.1 PF01841.17;Transglut_core;	62.2	5.1e-23
TRINITY_DN11954_c0_g1	M0SSN9_MUSAM/273-371	M0SSN9.1 PF00153.25;Mito_carr;	100	2.7e-16
TRINITY_DN11956_c0_g1	I1FKI0_AMPQE/11-166	I1FKI0.1 PF00179.24;UQ_con;	82.6	2.2e-47
TRINITY_DN11963_c0_g2	I3J145_ORENI/11-262	I3J145.1 PF02517.14;Abi;	38.5	3.4e-43
TRINITY_DN11964_c0_g1	H2LJS9_ORYLA/16-322	H2LJS9.1 PF01556.16;DnaJ_C;	53.1	3.2e-23
TRINITY_DN11966_c0_g1	B9RFB8_RICCO/1-164	B9RFB8.1 PF00838.15;TCTP;	93.2	1.9e-38
TRINITY_DN11970_c0_g1	I1FPE8_AMPQE/159-317	I1FPE8.1 PF02800.18;Gp_dh_C;	81.8	2.3e-66
TRINITY_DN11971_c0_g3	Q1XGA8_PHYPA/7-264	Q1XGA8.1 PF00510.16;COX3;	87.6	4.5e-130
TRINITY_DN11985_c0_g1	B3RU43_TRIAD/26-155	B3RU43.1 PF00692.17;dUTPase;	73.8	1.7e-49
TRINITY_DN11991_c0_g1	I1FEQ0_AMPQE/80-372	I1FEQ0.1 PF00579.23;tRNA-synt_1b;	82.7	7.4e-141
TRINITY_DN11992_c0_g1	A7S760_NEMVE/14-415	A7S760.1 PF06068.11;TIP49;	87.1	2e-201
TRINITY_DN11997_c0_g1	I1FVZ9_AMPQE/84-195	I1FVZ9.1 PF01245.18;Ribosomal_L19;	61.3	2.1e-31
TRINITY_DN11998_c0_g1	E7FCS1_DANRE/58-274	E7FCS1.1 PF05721.11;PhyH;	74.7	2.2e-98
TRINITY_DN11_c0_g1	H3B2R2_LATCH/25-132	H3B2R2.1 PF01392.20;Fz;	46.7	5.2e-09
TRINITY_DN12001_c0_g1	I1F9T1_AMPQE/9-300	I1F9T1.1 PF13350.4;Y_phosphatase3;	36.1	3.8e-49
TRINITY_DN12012_c0_g1	A0A0L0C6D3_LUCCU/1-59	A0A0L0C6D3.1 PF01194.15;RNA_pol_N;	98.2	2.3e-26
TRINITY_DN12012_c0_g3	V4TVT0_9ROSI/84-377	V4TVT0.1 PF05185.14;PRMT5;	59.5	1.4e-101
TRINITY_DN12028_c0_g1	A0A068Y1D0_ECHMU/75-127	A0A068Y1D0.1 PF00014.21;Kunitz_BPTI;	60.4	1.1e-13
TRINITY_DN12033_c0_g1	V4AQK2_LOTGI/15-85	V4AQK2.1 PF00076.20;RRM_1;	88.7	9.7e-32
TRINITY_DN12042_c0_g1	T1K4E8_TETUR/18-317	T1K4E8.1 PF00557.22;Peptidase_M24;	66	2.2e-116
TRINITY_DN12046_c0_g1	I1G9A6_AMPQE/31-354	I1G9A6.1 PF01120.15;Alpha_L_fucos;	59.5	3.8e-117
TRINITY_DN12051_c0_g1	W9VNA1_9EURO/9-629	W9VNA1.1 PF00012.18;HSP70;	33.3	4.6e-43
TRINITY_DN12062_c0_g1	F7B4M1_CIOIN/31-139	F7B4M1.2 PF01392.20;Fz;	33.3	2.1e-10
TRINITY_DN12068_c0_g1	F6VGK3_XENTR/234-317	F6VGK3.1 PF10258.7;RNA_GG_bind;	42.7	2.9e-10
TRINITY_DN12079_c0_g1	V4AHM5_LOTGI/9-104	V4AHM5.1 PF10270.7;MMgT;	42.7	4.8e-16
TRINITY_DN1207_c0_g1	I1FJ78_AMPQE/12-257	I1FJ78.1 PF05721.11;PhyH;	53.7	6.1e-73
TRINITY_DN12083_c0_g1	I1FIR7_AMPQE/23-110	I1FIR7.1 PF14712.4;Snapin_Pallidin;	65	1.5e-19
TRINITY_DN12084_c0_g1	I1F248_AMPQE/26-207	I1F248.1 PF01105.22;EMP24_GP25L;	74.2	1.2e-69
TRINITY_DN12086_c0_g1	I1FEW8_AMPQE/61-307	I1FEW8.1 PF03009.15;GDPD;	45.2	4.5e-57
TRINITY_DN12106_c1_g1	I1GEC8_AMPQE/159-301	I1GEC8.1 PF10607.7;CLTH;	62	4.5e-43
TRINITY_DN12108_c0_g1	I1FYU0_AMPQE/52-85	I1FYU0.1 PF10215.7;Ost4;	88.2	4.7e-08
TRINITY_DN12110_c0_g1	S2JAJ1_MUCC1/108-169	S2JAJ1.1 PF04117.10;Mpv17_PMP22;	50.8	6e-12
TRINITY_DN12114_c0_g1	A0A0A0KMT9_CUCSA/54-326	A0A0A0KMT9.1 PF01650.16;Peptidase_C13;	87.3	3.7e-22
TRINITY_DN12119_c0_g1	A0A087YMY5_POEFO/75-203	A0A087YMY5.2 PF01467.24;CTP_transf_like;	73.6	4.9e-52
TRINITY_DN12119_c0_g2	H2Y233_CIOIN/47-117	H2Y233.1 PF00076.20;RRM_1;	73.2	1.4e-26
TRINITY_DN12121_c0_g1	I1FFF2_AMPQE/20-123	I1FFF2.1 PF14886.4;FAM183;	67.3	1.1e-36
TRINITY_DN12122_c0_g1	G1PKZ6_MYOLU/1-241	G1PKZ6.1 PF00590.18;TP_methylase;	70.2	5.3e-92
TRINITY_DN12124_c0_g1	I1E7R5_AMPQE/4-82	I1E7R5.1 PF03227.14;GILT;	62.2	1.4e-22
TRINITY_DN12125_c0_g1	I3KB12_ORENI/58-159	I3KB12.1 PF14497.4;GST_C_3;	42.2	1.8e-16
TRINITY_DN12142_c0_g1	D2VHB8_NAEGR/132-318	D2VHB8.1 PF00092.26;VWA;	50.5	1.1e-45
TRINITY_DN12148_c0_g1	I1GFK4_AMPQE/145-274	I1GFK4.1 PF00107.24;ADH_zinc_N;	73.8	1e-51
TRINITY_DN12156_c0_g2	I1G133_AMPQE/4-73	I1G133.1 PF02935.14;COX7C;	62.5	1.7e-12
TRINITY_DN12161_c0_g1	I1F8B1_AMPQE/63-343	I1F8B1.1 PF00520.29;Ion_trans;	46.7	1.4e-56
TRINITY_DN12163_c0_g1	A0A0D2WME3_CAPO3/65-361	A0A0D2WME3.1 PF00676.18;E1_dh;	65.6	5.1e-111
TRINITY_DN12166_c0_g1	I1G9P7_AMPQE/17-82	I1G9P7.1 PF12352.6;V-SNARE_C;	73.5	3.2e-11
TRINITY_DN12171_c0_g1	A7SRR4_NEMVE/6-144	A7SRR4.1 PF00179.24;UQ_con;	80.6	1.1e-62
TRINITY_DN12190_c0_g1	I1G1Z7_AMPQE/13-293	I1G1Z7.1 PF05462.9;Dicty_CAR;	30.3	7.2e-09
TRINITY_DN12192_c0_g1	I1FNE0_AMPQE/79-570	I1FNE0.1 PF01039.20;Carboxyl_trans;	81.7	1.7e-244
TRINITY_DN12197_c0_g1	I1F4X9_AMPQE/205-383	I1F4X9.1 PF05063.12;MT-A70;	78.7	1.2e-85
TRINITY_DN12204_c0_g1	A1VIH4_POLNA/240-345	A1VIH4.1 PF10503.7;Esterase_phd;	49.5	4e-24
TRINITY_DN12206_c0_g1	B8M1Y9_TALSN/10-85	B8M1Y9.1 PF00173.26;Cyt-b5;	46.1	4.7e-15
TRINITY_DN12206_c0_g2	A0A0D2WVZ5_CAPO3/440-580	A0A0D2WVZ5.1 PF04116.11;FA_hydroxylase;	64.3	3.6e-47
TRINITY_DN12213_c0_g1	W4XN61_STRPU/99-169	W4XN61.1 PF00076.20;RRM_1;	50.7	1.1e-11
TRINITY_DN12214_c0_g1	F1QSB3_DANRE/58-237	F1QSB3.1 PF09439.8;SRPRB;	44.3	1.6e-33
TRINITY_DN12221_c0_g1	C3Z2C9_BRAFL/418-660	C3Z2C9.1 PF00406.20;ADK;	61	9.3e-41
TRINITY_DN12224_c0_g2	I1G735_AMPQE/38-145	I1G735.1 PF00651.29;BTB;	61.1	7e-29
TRINITY_DN12225_c0_g1	A0A0D2UGE6_CAPO3/10-171	A0A0D2UGE6.1 PF00071.20;Ras;	60	9.2e-51
TRINITY_DN12234_c0_g3	I1FZL3_AMPQE/12-138	I1FZL3.1 PF00179.24;UQ_con;	70.2	2.6e-29
TRINITY_DN12247_c0_g1	A0A087XZX2_POEFO/159-287	A0A087XZX2.2 PF02338.17;OTU;	50	3e-32
TRINITY_DN12258_c0_g1	I1FQ42_AMPQE/107-322	I1FQ42.1 PF13672.4;PP2C_2;	53.5	3.8e-52
TRINITY_DN12266_c0_g2	T1FXX9_HELRO/48-118	T1FXX9.1 PF10601.7;zf-LITAF-like;	51.7	1.1e-06
TRINITY_DN12269_c0_g1	W4X9Y7_STRPU/39-219	W4X9Y7.1 PF00445.16;Ribonuclease_T2;	37.9	3.5e-12
TRINITY_DN12271_c0_g1	I1FZ14_AMPQE/13-100	I1FZ14.1 PF10044.7;LIN52;	51.6	4.5e-20
TRINITY_DN12277_c0_g1	F6EHD2_AMYSD/16-242	F6EHD2.1 PF08450.10;SGL;	33.9	9e-29
TRINITY_DN12284_c0_g1	W4X9K4_STRPU/63-192	W4X9K4.1 PF04145.13;Ctr;	38.9	2.8e-15
TRINITY_DN12285_c0_g1	A4HU11_LEIIN/209-280	A4HU11.2 PF00240.21;ubiquitin;	95.8	1.2e-30
TRINITY_DN12290_c0_g1	B4JIF3_DROGR/31-165	B4JIF3.1 PF14955.4;MRP-S24;	50.7	8e-31
TRINITY_DN12290_c0_g2	I1GF56_AMPQE/62-165	I1GF56.1 PF04930.13;FUN14;	41.5	4.7e-13
TRINITY_DN12292_c0_g2	I1F9F1_AMPQE/659-773	I1F9F1.1 PF00665.24;rve;	69.4	1.9e-18
TRINITY_DN12292_c0_g3	I1EBF7_AMPQE/1-159	I1EBF7.1 PF00078.25;RVT_1;	67.3	1.2e-16
TRINITY_DN12297_c0_g1	T1FXC7_HELRO/1-115	T1FXC7.1 PF09771.7;Tmemb_18A;	43.5	1.8e-19
TRINITY_DN12297_c0_g2	H2RDW9_PANTR/18-81	H2RDW9.1 PF00076.20;RRM_1;	45.6	2.1e-07
TRINITY_DN12301_c0_g1	R1DSV0_EMIHU/23-79	R1DSV0.1 PF08207.10;EFP_N;	75.4	9e-20
TRINITY_DN12302_c0_g1	A0A0A0MXY9_RAT/47-355	A0A0A0MXY9.1 PF00248.19;Aldo_ket_red;	58.5	6.1e-99
TRINITY_DN12310_c0_g1	V3ZVV2_LOTGI/2-150	V3ZVV2.1 PF10185.7;Mesd;	37.7	4.1e-25
TRINITY_DN12313_c0_g1	A7S3W8_NEMVE/115-390	A7S3W8.1 PF03629.16;SASA;	59.8	1.3e-95
TRINITY_DN12315_c0_g1	I1G2T3_AMPQE/824-900	I1G2T3.1 PF13424.4;TPR_12;	50	6e-13
TRINITY_DN12319_c0_g1	W4Z754_STRPU/1164-1205	W4Z754.1 PF00396.16;Granulin;	76.2	1.5e-13
TRINITY_DN12325_c0_g1	A0A0K0D283_ANGCA/60-130	A0A0K0D283.1 PF00076.20;RRM_1;	71.4	1.3e-22
TRINITY_DN12327_c0_g1	V4AKS7_LOTGI/52-230	V4AKS7.1 PF01227.20;GTP_cyclohydroI;	65.5	8.2e-58
TRINITY_DN12330_c0_g2	A7S3V2_NEMVE/1-178	A7S3V2.1 PF10520.7;TMEM189_B_dmain;	70.9	4.3e-74
TRINITY_DN12333_c0_g1	C3YUT2_BRAFL/68-387	C3YUT2.1 PF00026.21;Asp;	63.4	5.7e-120
TRINITY_DN12339_c0_g1	I1GJ15_AMPQE/49-385	I1GJ15.1 PF10744.7;Med1;	39.3	1.5e-44
TRINITY_DN12343_c0_g1	G0QUH8_ICHMG/22-323	G0QUH8.1 PF00248.19;Aldo_ket_red;	68.1	3.7e-115
TRINITY_DN12354_c0_g1	I1GGA9_AMPQE/221-458	I1GGA9.1 PF12146.6;Hydrolase_4;	44.3	2.1e-49
TRINITY_DN12354_c0_g2	C3ZFS3_BRAFL/44-281	C3ZFS3.1 PF12146.6;Hydrolase_4;	41.8	1.7e-50
TRINITY_DN12363_c0_g1	H2NLR0_PONAB/28-141	H2NLR0.1 PF14580.4;LRR_9;	42.7	8.1e-14
TRINITY_DN12367_c0_g1	I1FPY1_AMPQE/347-503	I1FPY1.1 PF10152.7;DUF2360;	72.5	9.2e-09
TRINITY_DN12367_c0_g2	I1FPY1_AMPQE/347-503	I1FPY1.1 PF10152.7;DUF2360;	64.3	9.8e-19
TRINITY_DN12368_c0_g1	I1G124_AMPQE/396-655	I1G124.1 PF00069.23;Pkinase;	64.3	4.3e-25
TRINITY_DN12382_c0_g1	I1F1F4_AMPQE/4107-4238	I1F1F4.1 PF05168.12;HEPN;	36	2.5e-11
TRINITY_DN12383_c0_g1	F1NIB9_CHICK/1-163	F1NIB9.2 PF05706.10;CDKN3;	46.8	7.4e-25
TRINITY_DN12383_c0_g4	T1GR12_MEGSC/5-70	T1GR12.1 PF00536.28;SAM_1;	59.7	1.3e-13
TRINITY_DN12383_c0_g6	I1FL85_AMPQE/4-73	I1FL85.1 PF05486.10;SRP9-21;	70	3.4e-24
TRINITY_DN12386_c0_g2	I1FAH6_AMPQE/406-617	I1FAH6.1 PF12251.6;zf-SNAP50_C;	45.1	1.8e-40
TRINITY_DN12388_c0_g1	I1G0A0_AMPQE/118-213	I1G0A0.1 PF13640.4;2OG-FeII_Oxy_3;	53.5	3.3e-23
TRINITY_DN12393_c0_g1	T1JB12_STRMM/34-534	T1JB12.1 PF00118.22;Cpn60_TCP1;	80.9	2e-66
TRINITY_DN12393_c0_g2	I1G6N6_AMPQE/31-527	I1G6N6.1 PF00118.22;Cpn60_TCP1;	83.9	2.7e-155
TRINITY_DN12394_c0_g1	T1HGP4_RHOPR/1-188	T1HGP4.1 PF05806.10;Noggin;	37.8	5.5e-11
TRINITY_DN12411_c0_g1	I1FZW7_AMPQE/136-261	I1FZW7.1 PF00134.21;Cyclin_N;	74.8	8.8e-43
TRINITY_DN12413_c0_g2	I1FX49_AMPQE/27-106	I1FX49.1 PF07019.10;Rab5ip;	63.8	1.3e-20
TRINITY_DN12414_c0_g1	I1G1V2_AMPQE/59-510	I1G1V2.1 PF00083.22;Sugar_tr;	45.1	1.5e-99
TRINITY_DN12420_c0_g1	A7RPH4_NEMVE/83-237	A7RPH4.1 PF17098.3;Wtap;	76.6	1.9e-51
TRINITY_DN12424_c0_g1	J0XEF5_LOALO/26-168	J0XEF5.1 PF01161.18;PBP;	61	2.8e-46
TRINITY_DN12425_c0_g1	I1F6V6_AMPQE/135-222	I1F6V6.1 PF03088.14;Str_synth;	50	5.2e-16
TRINITY_DN12436_c0_g1	I1FLG2_AMPQE/160-249	I1FLG2.1 PF00250.16;Forkhead;	74.3	1.5e-25
TRINITY_DN12439_c0_g1	C3Z8J3_BRAFL/9-187	C3Z8J3.1 PF02441.17;Flavoprotein;	68	1.9e-37
TRINITY_DN12440_c0_g1	I1FWQ4_AMPQE/39-320	I1FWQ4.1 PF06098.9;Radial_spoke_3;	72.9	1.4e-79
TRINITY_DN12443_c0_g1	A0A0D2VXK5_CAPO3/9-337	A0A0D2VXK5.1 PF00225.21;Kinesin;	51.7	6e-51
TRINITY_DN12452_c0_g1	K1QUC2_CRAGI/58-155	K1QUC2.1 PF05071.14;NDUFA12;	62.2	4.5e-30
TRINITY_DN12453_c0_g1	C3Z6T5_BRAFL/540-594	C3Z6T5.1 PF00084.18;Sushi;	49.1	1.8e-07
TRINITY_DN12463_c0_g1	A0A0G4H4N9_9ALVE/11-150	A0A0G4H4N9.1 PF14580.4;LRR_9;	51.2	3.1e-27
TRINITY_DN12463_c0_g2	I1F7I1_AMPQE/18-67	I1F7I1.1 PF05154.14;TM2;	88	1.1e-17
TRINITY_DN12466_c0_g1	I1FJM0_AMPQE/719-902	I1FJM0.1 PF07744.11;SPOC;	70.2	2.6e-67
TRINITY_DN12470_c0_g1	H2Z7N3_CIOSA/64-137	H2Z7N3.1 PF00276.18;Ribosomal_L23;	90.5	6.5e-32
TRINITY_DN12470_c0_g3	I2GLK0_9BACT/14-249	I2GLK0.1 PF13561.4;adh_short_C2;	39.4	6.1e-24
TRINITY_DN12470_c0_g4	A9UPE4_MONBE/13-247	A9UPE4.1 PF13561.4;adh_short_C2;	71.9	6e-18
TRINITY_DN12483_c0_g1	I1GHC2_AMPQE/1-369	I1GHC2.1 PF00297.20;Ribosomal_L3;	67.1	1e-168
TRINITY_DN12487_c0_g1	E5SKJ5_TRISP/169-263	E5SKJ5.1 PF00153.25;Mito_carr;	57.5	2.4e-22
TRINITY_DN12488_c0_g1	B7Q2A2_IXOSC/121-150	B7Q2A2.1 PF04438.14;zf-HIT;	75.9	4.8e-07
TRINITY_DN12491_c0_g2	I1G1Y2_AMPQE/71-227	I1G1Y2.1 PF05729.10;NACHT;	37.2	7.6e-18
TRINITY_DN12492_c0_g1	B7PF78_IXOSC/36-182	B7PF78.1 PF13091.4;PLDc_2;	55.4	4.9e-41
TRINITY_DN12493_c0_g1	W5CAT7_WHEAT/103-327	W5CAT7.1 PF00006.23;ATP-synt_ab;	98.2	1.3e-118
TRINITY_DN12494_c0_g2	A0A0N0J7V3_9PROT/1-37	A0A0N0J7V3.1 PF00444.16;Ribosomal_L36;	94.6	2.4e-12
TRINITY_DN12504_c0_g1	A8XZA8_CAEBR/23-201	A8XZA8.1 PF02779.22;Transket_pyr;	77.1	1.2e-76
TRINITY_DN1250_c0_g1	F7AUW2_HORSE/7-613	F7AUW2.1 PF00012.18;HSP70;	98.8	6.9e-38
TRINITY_DN12517_c0_g1	FA76B_XENTR/5-326	Q566M1.1 PF16046.3;FAM76;	56.6	2.2e-24
TRINITY_DN12520_c0_g1	I1F253_AMPQE/4-205	I1F253.1 PF10574.7;UPF0552;	48.2	7.7e-39
TRINITY_DN12520_c0_g3	C3YXD4_BRAFL/223-262	C3YXD4.1 PF00400.30;WD40;	77.8	2.8e-09
TRINITY_DN12529_c0_g2	I1FUC2_AMPQE/19-127	I1FUC2.1 PF00169.27;PH;	73.2	1.8e-08
TRINITY_DN12529_c0_g3	I1FVI6_AMPQE/271-511	I1FVI6.1 PF01151.16;ELO;	43.2	2.2e-50
TRINITY_DN12532_c0_g1	W9QUF2_9ROSA/130-194	W9QUF2.1 PF14559.4;TPR_19;	67.7	1.4e-17
TRINITY_DN12539_c0_g1	A0A0N5AWI9_9BILA/185-281	A0A0N5AWI9.1 PF12763.5;EF-hand_4;	52.2	1.7e-19
TRINITY_DN1253_c0_g1	A0A0G4MZ74_9PEZI/2-58	A0A0G4MZ74.1 PF08207.10;EFP_N;	84.2	4.4e-21
TRINITY_DN12541_c0_g1	K7J500_NASVI/204-251	K7J500.1 PF00628.27;PHD;	75	5.3e-19
TRINITY_DN12541_c0_g2	I1GE81_AMPQE/318-479	I1GE81.1 PF05063.12;MT-A70;	90.1	5.5e-87
TRINITY_DN12543_c0_g1	A0A0D3DRI8_BRAOL/6-185	A0A0D3DRI8.1 PF01294.16;Ribosomal_L13e;	91.8	2.1e-43
TRINITY_DN12547_c0_g1	Q7Q9H3_ANOGA/125-211	Q7Q9H3.3 PF03083.14;MtN3_slv;	50	4.4e-14
TRINITY_DN12550_c0_g1	I1GDA7_AMPQE/32-214	I1GDA7.1 PF00227.24;Proteasome;	72.7	1.6e-77
TRINITY_DN12552_c0_g1	I1FMC5_AMPQE/261-480	I1FMC5.1 PF00149.26;Metallophos;	50.2	1.9e-60
TRINITY_DN12552_c0_g2	F2UK05_SALR5/155-257	F2UK05.1 PF16656.3;Pur_ac_phosph_N;	49.4	7.5e-18
TRINITY_DN12553_c0_g1	I1GDK6_AMPQE/544-643	I1GDK6.1 PF13640.4;2OG-FeII_Oxy_3;	78	5.1e-43
TRINITY_DN12555_c0_g1	I1G9J2_AMPQE/12-201	I1G9J2.1 PF04511.13;DER1;	44.7	4.1e-57
TRINITY_DN12558_c0_g1	C3ZV31_BRAFL/60-188	C3ZV31.1 PF00293.26;NUDIX;	48.8	4.5e-32
TRINITY_DN12560_c0_g1	Q7QFK7_ANOGA/14-154	Q7QFK7.3 PF07884.12;VKOR;	41.8	1.4e-21
TRINITY_DN12570_c0_g1	W5NM29_LEPOC/176-281	W5NM29.1 PF03370.11;CBM_21;	30.1	4.1e-07
TRINITY_DN12573_c0_g1	A0A0D2WIK7_CAPO3/205-318	A0A0D2WIK7.1 PF00373.16;FERM_M;	46.5	1.9e-21
TRINITY_DN12574_c0_g1	I1FFU6_AMPQE/72-128	I1FFU6.1 PF01849.16;NAC;	74.4	9.4e-10
TRINITY_DN12574_c0_g2	F1RWS8_PIG/1-175	F1RWS8.1 PF14580.4;LRR_9;	66.9	2.1e-48
TRINITY_DN12577_c0_g1	I1GJ95_AMPQE/14-236	I1GJ95.1 PF00335.18;Tetraspannin;	33.7	6.7e-15
TRINITY_DN12581_c0_g1	T1KZR4_TETUR/12-476	T1KZR4.1 PF00221.17;Lyase_aromatic;	58.8	8.3e-145
TRINITY_DN12584_c1_g1	W5LYL6_LEPOC/225-424	W5LYL6.1 PF13851.4;GAS;	64.1	4.6e-19
TRINITY_DN12584_c1_g3	I1G5P9_AMPQE/231-430	I1G5P9.1 PF13851.4;GAS;	73.7	2.4e-29
TRINITY_DN12587_c0_g1	I1FY48_AMPQE/343-624	I1FY48.1 PF04869.12;Uso1_p115_head;	56.8	1.3e-84
TRINITY_DN12590_c0_g1	I1G9Y8_AMPQE/17-259	I1G9Y8.1 PF13561.4;adh_short_C2;	61.3	8.8e-77
TRINITY_DN12591_c0_g1	W4Z397_STRPU/2-146	W4Z397.1 PF15473.4;PCNP;	57.1	4e-14
TRINITY_DN12604_c0_g1	I1FU17_AMPQE/338-538	I1FU17.1 PF03441.12;FAD_binding_7;	62.2	5.4e-78
TRINITY_DN12605_c1_g1	A0A067QWE4_ZOONE/10-71	A0A067QWE4.1 PF05030.10;SSXT;	61.7	4.7e-13
TRINITY_DN12607_c0_g2	I1FYH8_AMPQE/43-366	I1FYH8.1 PF00443.27;UCH;	39	1.9e-12
TRINITY_DN12611_c0_g1	I1FPR4_AMPQE/82-140	I1FPR4.1 PF00076.20;RRM_1;	84	2.8e-19
TRINITY_DN12611_c0_g2	I1G899_AMPQE/1-80	I1G899.1 PF01249.16;Ribosomal_S21e;	73.4	2.2e-27
TRINITY_DN12618_c0_g1	K7IZS7_NASVI/97-269	K7IZS7.1 PF00953.19;Glycos_transf_4;	67.6	5.5e-67
TRINITY_DN12619_c0_g1	I1EV83_AMPQE/367-564	I1EV83.1 PF04389.15;Peptidase_M28;	55.6	3.5e-14
TRINITY_DN12625_c0_g1	S2J520_MUCC1/81-362	S2J520.1 PF01546.26;Peptidase_M20;	60	1.3e-07
TRINITY_DN12625_c0_g2	I1EIZ3_AMPQE/82-349	I1EIZ3.1 PF01546.26;Peptidase_M20;	62	3.5e-87
TRINITY_DN12628_c0_g1	A0A077ZZT2_STYLE/47-281	A0A077ZZT2.1 PF00722.19;Glyco_hydro_16;	55.5	1.9e-73
TRINITY_DN12628_c0_g2	A0A077ZZT2_STYLE/47-281	A0A077ZZT2.1 PF00722.19;Glyco_hydro_16;	53.4	1.8e-70
TRINITY_DN12631_c0_g2	I3LVN1_PIG/41-451	I3LVN1.1 PF07767.9;Nop53;	31.4	5.3e-27
TRINITY_DN12632_c0_g1	E0VIW1_PEDHC/51-340	E0VIW1.1 PF00069.23;Pkinase;	51.7	3e-85
TRINITY_DN12640_c0_g1	H3B9Z9_LATCH/4-181	H3B9Z9.1 PF00025.19;Arf;	27.7	6.3e-11
TRINITY_DN12649_c0_g1	E1C028_CHICK/938-995	E1C028.2 PF00090.17;TSP_1;	51.7	8.1e-07
TRINITY_DN12650_c0_g1	I1G7A3_AMPQE/27-137	I1G7A3.1 PF15123.4;DUF4562;	53.4	4.3e-28
TRINITY_DN12652_c0_g1	C3ZMW1_BRAFL/23-85	C3ZMW1.1 PF00076.20;RRM_1;	36.7	7.8e-07
TRINITY_DN12657_c0_g1	I1FM80_AMPQE/36-143	I1FM80.1 PF00651.29;BTB;	71.4	1.7e-29
TRINITY_DN12658_c0_g1	I1EV83_AMPQE/617-732	I1EV83.1 PF04253.13;TFR_dimer;	58.5	9.5e-12
TRINITY_DN12661_c0_g2	A0A015NCP2_9GLOM/64-162	A0A015NCP2.1 PF03091.13;CutA1;	59.2	1.4e-26
TRINITY_DN12665_c0_g3	I1F6W2_AMPQE/32-223	I1F6W2.1 PF08190.10;PIH1;	59.6	3.2e-09
TRINITY_DN12666_c0_g1	W4X6P6_ATTCE/15-102	W4X6P6.1 PF01172.16;SBDS;	85.1	4.9e-35
TRINITY_DN12673_c0_g1	D8Q4D5_SCHCM/30-168	D8Q4D5.1 PF01522.19;Polysacc_deac_1;	49.3	6.9e-33
TRINITY_DN12676_c0_g1	F6UA18_CIOIN/71-221	F6UA18.1 PF13429.4;TPR_15;	54.2	9.9e-37
TRINITY_DN12680_c0_g1	I1FXC3_AMPQE/392-736	I1FXC3.1 PF03124.12;EXS;	38.4	2.8e-57
TRINITY_DN12689_c0_g2	I1FAA9_AMPQE/1-154	I1FAA9.1 PF00025.19;Arf;	36	8.9e-30
TRINITY_DN12691_c0_g2	I1GCV7_AMPQE/15-82	I1GCV7.1 PF15454.4;LAMTOR;	54.8	4.2e-12
TRINITY_DN12693_c0_g1	I1FPL8_AMPQE/22-130	I1FPL8.1 PF00581.18;Rhodanese;	50.5	7e-21
TRINITY_DN12706_c0_g2	A0A0N1BS65_9SPHN/255-432	A0A0N1BS65.1 PF13360.4;PQQ_2;	46.2	4.9e-11
TRINITY_DN12709_c0_g1	W4Z6R9_STRPU/60-354	W4Z6R9.1 PF08423.9;Rad51;	45.8	3e-56
TRINITY_DN12709_c0_g2	I1G6N8_AMPQE/143-267	I1G6N8.1 PF01569.19;PAP2;	54	3e-31
TRINITY_DN12714_c0_g1	I1G0Q4_AMPQE/16-194	I1G0Q4.1 PF02816.16;Alpha_kinase;	55	1.2e-29
TRINITY_DN12720_c0_g1	G3HQ17_CRIGR/94-202	G3HQ17.1 PF13911.4;AhpC-TSA_2;	50	3.1e-23
TRINITY_DN12721_c0_g1	V4A567_LOTGI/48-246	V4A567.1 PF00106.23;adh_short;	56.8	1.4e-54
TRINITY_DN12726_c0_g2	T1FNG6_HELRO/136-178	T1FNG6.1 PF00400.30;WD40;	90.7	2.3e-18
TRINITY_DN12726_c0_g4	I1GIT7_AMPQE/7-137	I1GIT7.1 PF04628.11;Sedlin_N;	63.3	4.1e-21
TRINITY_DN12727_c0_g1	G7IH33_MEDTR/605-722	G7IH33.1 PF03764.16;EFG_IV;	96.4	1.2e-24
TRINITY_DN12727_c0_g2	I0YUW3_9CHLO/599-727	I0YUW3.1 PF03764.16;EFG_IV;	84.3	3.1e-21
TRINITY_DN12728_c0_g1	W4XRK1_STRPU/5-270	W4XRK1.1 PF02077.13;SURF4;	63.4	5.7e-90
TRINITY_DN12730_c0_g1	I1G164_AMPQE/65-163	I1G164.1 PF00169.27;PH;	49.2	6.5e-09
TRINITY_DN12732_c0_g1	K1QIQ6_CRAGI/15-414	K1QIQ6.1 PF03148.12;Tektin;	46.9	8.5e-88
TRINITY_DN12736_c0_g1	A7RNB3_NEMVE/23-378	A7RNB3.1 PF01094.26;ANF_receptor;	28.7	1.6e-06
TRINITY_DN12736_c0_g2	B3RTG3_TRIAD/1-359	B3RTG3.1 PF01094.26;ANF_receptor;	27.7	3.7e-09
TRINITY_DN12743_c0_g1	I1N5I8_SOYBN/56-173	I1N5I8.1 PF01277.15;Oleosin;	68.1	5.8e-09
TRINITY_DN12744_c0_g1	I1GF81_AMPQE/83-139	I1GF81.1 PF00046.27;Homeobox;	89.5	4.5e-22
TRINITY_DN12746_c0_g2	A0A0D2WQE8_CAPO3/255-406	A0A0D2WQE8.1 PF12422.6;Condensin2nSMC;	51.7	4.1e-38
TRINITY_DN12748_c0_g1	G7IS29_MEDTR/183-846	G7IS29.1 PF00305.17;Lipoxygenase;	89.7	4.4e-56
TRINITY_DN12748_c0_g2	G7IS29_MEDTR/183-846	G7IS29.1 PF00305.17;Lipoxygenase;	86.1	1.3e-29
TRINITY_DN12748_c0_g3	G7IS29_MEDTR/66-170	G7IS29.1 PF01477.21;PLAT;	85.7	1.7e-47
TRINITY_DN12748_c0_g4	G7LIZ6_MEDTR/276-817	G7LIZ6.2 PF00305.17;Lipoxygenase;	83.3	6.7e-38
TRINITY_DN12748_c0_g5	LOX2_SOYBN/187-849	P09439.1 PF00305.17;Lipoxygenase;	83.4	5.5e-134
TRINITY_DN12749_c0_g1	C3YQ61_BRAFL/2-262	C3YQ61.1 PF00483.21;NTP_transferase;	49.4	2.9e-38
TRINITY_DN12750_c0_g2	S8DB49_9LAMI/76-295	S8DB49.1 PF00119.18;ATP-synt_A;	85	6.2e-94
TRINITY_DN12750_c0_g5	H8Y6Q3_SOYBN/21-209	H8Y6Q3.1 PF00033.17;Cytochrome_B;	96.3	4e-101
TRINITY_DN12750_c0_g9	S8EC20_9LAMI/150-367	S8EC20.1 PF00006.23;ATP-synt_ab;	94.6	8e-42
TRINITY_DN12752_c0_g1	G3RJW1_GORGO/24-140	G3RJW1.1 PF00383.21;dCMP_cyt_deam_1;	44.4	9.2e-22
TRINITY_DN12755_c1_g4	B3RJD9_TRIAD/18-200	B3RJD9.1 PF01171.18;ATP_bind_3;	63.3	1.1e-07
TRINITY_DN12755_c1_g5	I1FY69_AMPQE/72-135	I1FY69.1 PF05180.10;zf-DNL;	68.8	1.2e-14
TRINITY_DN12756_c0_g1	A5UWG7_ROSS1/38-475	A5UWG7.1 PF01593.22;Amino_oxidase;	44.9	1.9e-15
TRINITY_DN12766_c0_g1	V4CCF8_LOTGI/124-189	V4CCF8.1 PF12352.6;V-SNARE_C;	57.8	4.6e-06
TRINITY_DN12767_c0_g1	V9FDA4_PHYPR/18-99	V9FDA4.1 PF15511.4;CENP-T_C;	97.6	6e-37
TRINITY_DN12768_c0_g1	K1PTQ4_CRAGI/1-306	K1PTQ4.1 PF06113.10;BRE;	44.8	6.1e-47
TRINITY_DN12771_c0_g1	I1FU22_AMPQE/32-333	I1FU22.1 PF09755.7;DUF2046;	66.1	9.1e-26
TRINITY_DN12774_c0_g1	B1Y6J5_LEPCP/7-292	B1Y6J5.1 PF13609.4;Porin_4;	45.6	9.3e-08
TRINITY_DN12774_c0_g3	A0A0G3BY50_9BURK/7-336	A0A0G3BY50.1 PF13609.4;Porin_4;	58.6	5.9e-16
TRINITY_DN12776_c0_g1	G1L8E2_AILME/11-116	G1L8E2.1 PF00383.21;dCMP_cyt_deam_1;	61.9	2.4e-27
TRINITY_DN12778_c0_g1	I1G434_AMPQE/28-426	I1G434.1 PF03985.11;Paf1;	67.9	8.4e-108
TRINITY_DN12778_c0_g2	V3ZY31_LOTGI/3-412	V3ZY31.1 PF03985.11;Paf1;	76.9	1.7e-10
TRINITY_DN12783_c0_g2	C4ZLV1_THASP/8-258	C4ZLV1.1 PF00463.19;ICL;	88.9	4.5e-40
TRINITY_DN12783_c0_g3	C4ZLV1_THASP/8-258	C4ZLV1.1 PF00463.19;ICL;	95.6	2e-68
TRINITY_DN12786_c0_g1	A0A067QZC6_ZOONE/254-304	A0A067QZC6.1 PF10058.7;zinc_ribbon_10;	80	1.1e-17
TRINITY_DN12792_c0_g1	H2RSB9_TAKRU/334-457	H2RSB9.1 PF14815.4;NUDIX_4;	35	1.1e-07
TRINITY_DN12794_c0_g1	I1G1E5_AMPQE/8-174	I1G1E5.1 PF15169.4;DUF4564;	44.4	3.5e-37
TRINITY_DN12794_c0_g2	I1G1J6_AMPQE/25-334	I1G1J6.1 PF01207.15;Dus;	67.3	6.3e-121
TRINITY_DN12797_c0_g1	A0A089YTG2_9PSED/28-269	A0A089YTG2.1 PF00561.18;Abhydrolase_1;	36.7	2.2e-36
TRINITY_DN12799_c0_g3	I1FYZ8_AMPQE/385-689	I1FYZ8.1 PF00928.19;Adap_comp_sub;	57.7	2.4e-99
TRINITY_DN12800_c0_g1	M3X6J6_FELCA/122-276	M3X6J6.1 PF01529.18;zf-DHHC;	45.2	6.7e-26
TRINITY_DN12806_c1_g2	I1GCQ5_AMPQE/197-268	I1GCQ5.1 PF13921.4;Myb_DNA-bind_6;	52.8	6.5e-08
TRINITY_DN12806_c2_g1	C3ZWY4_BRAFL/8-73	C3ZWY4.1 PF00808.21;CBFD_NFYB_HMF;	77.3	1.3e-19
TRINITY_DN12811_c0_g1	A7RHV4_NEMVE/8-159	A7RHV4.1 PF00179.24;UQ_con;	83.9	1e-55
TRINITY_DN12815_c0_g1	I1FTS0_AMPQE/5-92	I1FTS0.1 PF00564.22;PB1;	54.1	5.9e-18
TRINITY_DN12816_c0_g1	A7RYJ3_NEMVE/486-597	A7RYJ3.1 PF00431.18;CUB;	34.3	2.2e-12
TRINITY_DN12817_c0_g1	H2UPY4_TAKRU/3-273	H2UPY4.1 PF14617.4;CMS1;	32.7	1.2e-17
TRINITY_DN12818_c0_g2	A7SLD5_NEMVE/17-227	A7SLD5.1 PF00856.26;SET;	37.1	3.6e-37
TRINITY_DN12825_c0_g1	I1GIC7_AMPQE/65-176	I1GIC7.1 PF15256.4;SPATIAL;	57.8	1.2e-26
TRINITY_DN12828_c0_g1	I1EPR7_AMPQE/436-533	I1EPR7.1 PF00530.16;SRCR;	54.5	8.4e-11
TRINITY_DN12832_c0_g1	I1G2K4_AMPQE/86-148	I1G2K4.1 PF00010.24;HLH;	64.9	1.8e-12
TRINITY_DN12834_c0_g1	I1G4Y8_AMPQE/144-381	I1G4Y8.1 PF10225.7;NEMP;	33.5	1.3e-29
TRINITY_DN12838_c0_g1	I1FUC5_AMPQE/300-358	I1FUC5.1 PF00628.27;PHD;	81.4	2.2e-23
TRINITY_DN12843_c0_g1	A7RLY5_NEMVE/30-528	A7RLY5.1 PF00118.22;Cpn60_TCP1;	76	3.4e-221
TRINITY_DN12845_c1_g1	I1GCB3_AMPQE/16-352	I1GCB3.1 PF02126.16;PTE;	51.2	2.1e-100
TRINITY_DN12846_c0_g1	I1FRI7_AMPQE/5-178	I1FRI7.1 PF00071.20;Ras;	57.4	2.7e-48
TRINITY_DN12847_c0_g1	U6PNQ6_HAECO/18-130	U6PNQ6.1 PF00318.18;Ribosomal_S2;	65.5	1.2e-37
TRINITY_DN12850_c0_g1	I1EZE1_AMPQE/2-198	I1EZE1.1 PF01323.18;DSBA;	52.3	6.2e-51
TRINITY_DN12851_c0_g1	C3YCA1_BRAFL/102-139	C3YCA1.1 PF00400.30;WD40;	81.6	2.9e-11
TRINITY_DN12851_c0_g2	C3ZJI8_BRAFL/1-86	C3ZJI8.1 PF04110.11;APG12;	42.7	2.3e-15
TRINITY_DN12856_c0_g1	F7BI71_XENTR/50-220	F7BI71.1 PF00149.26;Metallophos;	95.1	2.4e-78
TRINITY_DN12857_c0_g1	F6TCI4_HORSE/29-213	F6TCI4.1 PF00227.24;Proteasome;	80	1e-81
TRINITY_DN12859_c0_g1	I1G9V8_AMPQE/98-252	I1G9V8.1 PF02338.17;OTU;	53.5	2.9e-40
TRINITY_DN12862_c0_g1	B3RJU9_TRIAD/1-123	B3RJU9.1 PF10484.7;MRP-S23;	37	3.7e-10
TRINITY_DN12864_c1_g1	A0A0R4IVF7_DANRE/4-78	A0A0R4IVF7.1 PF10262.7;Rdx;	54.7	3.2e-15
TRINITY_DN12866_c0_g1	U3J090_ANAPL/1-329	U3J090.1 PF13393.4;tRNA-synt_His;	71.4	2.6e-135
TRINITY_DN12866_c0_g2	B0JZ73_XENTR/16-135	B0JZ73.1 PF02136.18;NTF2;	39.3	1.1e-21
TRINITY_DN12867_c0_g1	H0VLE7_CAVPO/178-496	H0VLE7.1 PF06664.10;MIG-14_Wnt-bd;	35.6	6.3e-20
TRINITY_DN12869_c0_g1	I1GB92_AMPQE/21-203	I1GB92.1 PF00069.23;Pkinase;	97.8	4.9e-74
TRINITY_DN12871_c0_g2	I1GBD9_AMPQE/285-393	I1GBD9.1 PF06859.10;Bin3;	56	3.6e-32
TRINITY_DN12874_c0_g1	F4S2W7_MELLP/15-313	F4S2W7.1 PF00491.19;Arginase;	37.2	2.5e-42
TRINITY_DN12875_c0_g1	I1F1T6_AMPQE/3-288	I1F1T6.1 PF10240.7;DUF2464;	41.5	4.3e-20
TRINITY_DN12882_c0_g1	I1FW37_AMPQE/71-138	I1FW37.1 PF01302.23;CAP_GLY;	55.9	6.5e-18
TRINITY_DN12886_c0_g1	Q894Q7_CLOTE/262-479	Q894Q7.1 PF00282.17;Pyridoxal_deC;	48.7	5.5e-37
TRINITY_DN12886_c0_g2	A0A0M8SK79_9ACTN/39-435	A0A0M8SK79.1 PF00282.17;Pyridoxal_deC;	47.1	1.4e-52
TRINITY_DN12889_c0_g1	R4FNP1_RHOPR/76-343	R4FNP1.1 PF00268.19;Ribonuc_red_sm;	47.4	1.6e-72
TRINITY_DN12890_c0_g2	A0A0M0J8Q3_9EUKA/851-1028	A0A0M0J8Q3.1 PF13360.4;PQQ_2;	32.5	1.4e-09
TRINITY_DN12891_c0_g2	C3Y3K5_BRAFL/1-302	C3Y3K5.1 PF01869.18;BcrAD_BadFG;	48.7	1.2e-80
TRINITY_DN12892_c0_g1	B0WGB3_CULQU/93-266	B0WGB3.1 PF01512.15;Complex1_51K;	91.9	1.3e-91
TRINITY_DN12892_c0_g2	I1FXP7_AMPQE/200-331	I1FXP7.1 PF00622.26;SPRY;	59.5	9.9e-43
TRINITY_DN12901_c0_g1	A0A0N4ZCD2_PARTI/22-157	A0A0N4ZCD2.1 PF07801.9;DUF1647;	50	5.3e-16
TRINITY_DN12907_c0_g1	A7SCF2_NEMVE/31-158	A7SCF2.1 PF04178.10;Got1;	33.3	2.2e-12
TRINITY_DN12908_c0_g1	H2Q7D4_PANTR/244-380	H2Q7D4.1 PF00004.27;AAA;	87.6	4.5e-61
TRINITY_DN12912_c0_g1	G3VK59_SARHA/62-208	G3VK59.1 PF01257.17;2Fe-2S_thioredx;	80.1	3.1e-63
TRINITY_DN12912_c1_g1	I3KE18_ORENI/10-224	I3KE18.1 PF00702.24;Hydrolase;	57	8.2e-21
TRINITY_DN12915_c0_g3	A7RKI3_NEMVE/24-186	A7RKI3.1 PF00071.20;Ras;	47.9	6.7e-36
TRINITY_DN12916_c0_g1	I1FLH2_AMPQE/178-336	I1FLH2.1 PF01556.16;DnaJ_C;	56	4.6e-48
TRINITY_DN12920_c0_g1	J9IDP4_9SPIT/197-326	J9IDP4.1 PF00004.27;AAA;	83.3	9.1e-35
TRINITY_DN12922_c3_g1	W4XYA9_STRPU/115-307	W4XYA9.1 PF00078.25;RVT_1;	44.8	2.4e-09
TRINITY_DN12922_c3_g3	I1FKS6_AMPQE/332-415	I1FKS6.1 PF13975.4;gag-asp_proteas;	56.5	1.7e-17
TRINITY_DN12923_c0_g1	I1G590_AMPQE/206-291	I1G590.1 PF12796.5;Ank_2;	50	8.8e-14
TRINITY_DN12924_c0_g1	W5MJF1_LEPOC/278-435	W5MJF1.1 PF01507.17;PAPS_reduct;	41	2e-36
TRINITY_DN12925_c0_g1	V4A6A8_LOTGI/2-81	V4A6A8.1 PF02798.18;GST_N;	73.7	2.7e-27
TRINITY_DN12928_c0_g1	SRGEF_MOUSE/283-348	Q80YD6.2 PF00415.16;RCC1;	47.7	5.7e-06
TRINITY_DN12932_c0_g1	C3ZA46_BRAFL/145-216	C3ZA46.1 PF07258.12;COMM_domain;	58.6	6.7e-16
TRINITY_DN12933_c0_g1	A0A068X773_HYMMI/2062-2199	A0A068X773.1 PF00179.24;UQ_con;	62.3	2.5e-50
TRINITY_DN12934_c0_g1	W4XY12_STRPU/605-765	W4XY12.1 PF00078.25;RVT_1;	62.7	3.3e-10
TRINITY_DN12938_c0_g1	T1KM83_TETUR/1-142	T1KM83.1 PF01217.18;Clat_adaptor_s;	84.4	5.2e-63
TRINITY_DN12939_c0_g1	A0A0P7TU33_9TELE/273-521	A0A0P7TU33.1 PF00928.19;Adap_comp_sub;	61.2	7.8e-86
TRINITY_DN12939_c0_g2	I1FVL8_AMPQE/252-308	I1FVL8.1 PF00046.27;Homeobox;	94.7	5.6e-22
TRINITY_DN12939_c0_g3	C3XZB0_BRAFL/3-161	C3XZB0.1 PF01217.18;Clat_adaptor_s;	79.2	1.6e-64
TRINITY_DN12940_c0_g1	I1G157_AMPQE/75-177	I1G157.1 PF07707.13;BACK;	68	8.4e-35
TRINITY_DN12953_c0_g1	V8P061_OPHHA/641-724	V8P061.1 PF00531.20;Death;	34.2	3.8e-07
TRINITY_DN12957_c0_g1	I1FZJ2_AMPQE/90-169	I1FZJ2.1 PF12796.5;Ank_2;	68	1.9e-11
TRINITY_DN12958_c0_g1	I1FNR7_AMPQE/301-392	I1FNR7.1 PF02319.18;E2F_TDP;	68.5	1.5e-27
TRINITY_DN12963_c0_g2	I1F817_AMPQE/118-539	I1F817.1 PF01425.19;Amidase;	47.9	3.5e-102
TRINITY_DN12971_c0_g1	M0RUX9_MUSAM/32-133	M0RUX9.1 PF01453.22;B_lectin;	57.7	3e-11
TRINITY_DN12972_c0_g4	A7SPQ4_NEMVE/1-119	A7SPQ4.1 PF00833.16;Ribosomal_S17e;	84	3.6e-48
TRINITY_DN12973_c0_g1	A0A087X518_POEFO/145-277	A0A087X518.2 PF03464.13;eRF1_2;	89.5	7e-63
TRINITY_DN12990_c0_g1	I1G2V2_AMPQE/6-122	I1G2V2.1 PF13806.4;Rieske_2;	70.9	9.5e-45
TRINITY_DN13003_c0_g3	M4AQB3_XIPMA/216-262	M4AQB3.1 PF00400.30;WD40;	87.2	3.6e-18
TRINITY_DN13005_c0_g1	D8LH47_ECTSI/38-272	D8LH47.1 PF00328.20;His_Phos_2;	35.2	4.5e-13
TRINITY_DN13009_c1_g1	I1FQ54_AMPQE/264-402	I1FQ54.1 PF00917.24;MATH;	52.5	3.3e-37
TRINITY_DN1300_c0_g1	C6SWG4_SOYBN/1-78	C6SWG4.1 PF01249.16;Ribosomal_S21e;	93.4	6.6e-35
TRINITY_DN13016_c0_g1	H9GJK7_ANOCA/78-542	H9GJK7.2 PF06762.12;LMF1;	51.8	1.3e-111
TRINITY_DN13017_c0_g3	G0QXZ0_ICHMG/131-749	G0QXZ0.1 PF00443.27;UCH;	34.4	2e-07
TRINITY_DN13019_c0_g1	A0A0D2WPC6_CAPO3/86-199	A0A0D2WPC6.1 PF08240.10;ADH_N;	66.4	2.3e-41
TRINITY_DN13020_c0_g1	I1GED5_AMPQE/59-551	I1GED5.1 PF00118.22;Cpn60_TCP1;	80	4.6e-229
TRINITY_DN13023_c0_g1	I1FX73_AMPQE/141-388	I1FX73.1 PF00481.19;PP2C;	59.1	1.2e-48
TRINITY_DN13024_c0_g1	B5DYG7_DROPS/78-293	B5DYG7.1 PF08450.10;SGL;	41.7	2.4e-28
TRINITY_DN13025_c0_g1	A0A068YAD1_ECHMU/193-313	A0A068YAD1.1 PF09405.8;Btz;	43.1	8.1e-06
TRINITY_DN13026_c0_g1	D6X254_TRICA/15-105	D6X254.1 PF02214.20;BTB_2;	78.8	5.7e-31
TRINITY_DN13026_c0_g3	I1FJ80_AMPQE/10-128	I1FJ80.1 PF14931.4;IFT20;	70.6	1.1e-38
TRINITY_DN13027_c1_g1	H9G8A4_ANOCA/68-303	H9G8A4.2 PF03878.13;YIF1;	54.9	3.5e-59
TRINITY_DN13032_c0_g1	I1FRI8_AMPQE/3-80	I1FRI8.1 PF07189.9;SF3b10;	82.1	4.6e-35
TRINITY_DN13033_c0_g1	F6Y4X7_CANLF/152-289	F6Y4X7.1 PF10568.7;Tom37;	37.5	1.1e-18
TRINITY_DN13034_c0_g1	I1FY70_AMPQE/4-73	I1FY70.1 PF08523.8;MBF1;	41.1	3.6e-09
TRINITY_DN13035_c0_g1	A0A075KGI2_9FIRM/23-159	A0A075KGI2.1 PF13580.4;SIS_2;	30.3	2.2e-08
TRINITY_DN13038_c0_g1	A0A0N4UHI6_DRAME/13-157	A0A0N4UHI6.1 PF00702.24;Hydrolase;	63.3	7.7e-24
TRINITY_DN13040_c0_g1	I1FMW4_AMPQE/158-234	I1FMW4.1 PF08511.9;COQ9;	60.5	7.9e-22
TRINITY_DN13042_c1_g3	C3YZV0_BRAFL/69-195	C3YZV0.1 PF00134.21;Cyclin_N;	61.9	6e-40
TRINITY_DN13043_c0_g3	I1F9C7_AMPQE/379-446	I1F9C7.1 PF00076.20;RRM_1;	91.2	2.5e-30
TRINITY_DN13044_c0_g1	B7KET0_CYAP7/9-251	B7KET0.1 PF09925.7;DUF2157;	40.8	7.7e-37
TRINITY_DN13045_c0_g1	T1EGA1_HELRO/9-299	T1EGA1.1 PF00069.23;Pkinase;	80.3	2.6e-145
TRINITY_DN13045_c0_g2	I3KRS9_ORENI/6-194	I3KRS9.1 PF04722.11;Ssu72;	66.1	6.3e-69
TRINITY_DN13048_c0_g1	I1G1V1_AMPQE/72-136	I1G1V1.1 PF02319.18;E2F_TDP;	89.2	4.4e-25
TRINITY_DN13049_c0_g1	M4AVP7_XIPMA/1315-1863	M4AVP7.1 PF08337.10;Plexin_cytopl;	43.3	1.8e-25
TRINITY_DN13051_c0_g1	I1GH81_AMPQE/184-261	I1GH81.1 PF12796.5;Ank_2;	55.2	2.6e-12
TRINITY_DN13054_c0_g1	A0A087ZUK9_APIME/28-171	A0A087ZUK9.1 PF00056.21;Ldh_1_N;	75	1.9e-28
TRINITY_DN13055_c0_g1	A0A067RDK5_ZOONE/223-365	A0A067RDK5.1 PF00069.23;Pkinase;	54.9	5.7e-42
TRINITY_DN13056_c0_g1	W4YS31_STRPU/119-259	W4YS31.1 PF05020.13;zf-NPL4;	67.3	5.1e-43
TRINITY_DN13056_c0_g2	C3YJD0_BRAFL/167-477	C3YJD0.1 PF05021.13;NPL4;	55.4	4.2e-63
TRINITY_DN13061_c0_g1	C3YBU2_BRAFL/44-321	C3YBU2.1 PF03098.13;An_peroxidase;	50.2	7.5e-69
TRINITY_DN13064_c0_g1	L8H952_ACACA/194-301	L8H952.1 PF14497.4;GST_C_3;	37.1	4.6e-09
TRINITY_DN13065_c0_g1	I1GG57_AMPQE/87-309	I1GG57.1 PF00089.24;Trypsin;	55.8	6.1e-73
TRINITY_DN13066_c0_g1	I1GGA9_AMPQE/221-458	I1GGA9.1 PF12146.6;Hydrolase_4;	45	1.5e-53
TRINITY_DN13070_c0_g1	I3JI31_ORENI/144-243	I3JI31.1 PF02174.15;IRS;	32.6	2.4e-07
TRINITY_DN13074_c0_g1	I1GER4_AMPQE/297-418	I1GER4.1 PF15073.4;DUF4540;	42.1	1.3e-12
TRINITY_DN13076_c0_g1	H2V275_TAKRU/405-475	H2V275.1 PF00076.20;RRM_1;	80.3	1.7e-25
TRINITY_DN13077_c0_g2	I1GJ59_AMPQE/268-417	I1GJ59.1 PF05118.13;Asp_Arg_Hydrox;	77.8	6.2e-06
TRINITY_DN13077_c0_g3	I1GJ59_AMPQE/268-417	I1GJ59.1 PF05118.13;Asp_Arg_Hydrox;	65.6	4.8e-45
TRINITY_DN13080_c0_g1	F2UB69_SALR5/1-150	F2UB69.1 PF06052.10;3-HAO;	67.3	5.6e-56
TRINITY_DN13084_c0_g1	I1FXQ8_AMPQE/29-172	I1FXQ8.1 PF01280.18;Ribosomal_L19e;	87.5	4.9e-65
TRINITY_DN13086_c0_g1	I1G6B8_AMPQE/1-50	I1G6B8.1 PF14813.4;NADH_B2;	47.1	1.8e-11
TRINITY_DN13095_c0_g1	G3Q471_GASAC/210-262	G3Q471.1 PF13639.4;zf-RING_2;	73.1	2.4e-17
TRINITY_DN13096_c0_g15	NU5M_ARATH/130-430	P29388.3 PF00361.18;Proton_antipo_M;	100	1.4e-37
TRINITY_DN13096_c0_g7	Q8HCR3_ORYSJ/433-640	Q8HCR3.3 PF06455.9;NADH5_C;	97.9	1.5e-46
TRINITY_DN13097_c0_g1	B3RLA6_TRIAD/16-145	B3RLA6.1 PF00828.17;Ribosomal_L27A;	66.4	2.3e-43
TRINITY_DN13099_c0_g1	I1FUY0_AMPQE/89-292	I1FUY0.1 PF04678.11;MCU;	35.5	1.1e-42
TRINITY_DN1309_c0_g1	E1Z2W6_CHLVA/91-143	E1Z2W6.1 PF01907.17;Ribosomal_L37e;	100	1.5e-23
TRINITY_DN13100_c0_g1	I1GIX4_AMPQE/187-441	I1GIX4.1 PF12736.5;CABIT;	22.6	3.7e-09
TRINITY_DN13103_c0_g2	E1ZKB2_CHLVA/30-493	E1ZKB2.1 PF00083.22;Sugar_tr;	58.4	3.8e-53
TRINITY_DN13103_c0_g3	A0A059LM10_9CHLO/29-492	A0A059LM10.1 PF00083.22;Sugar_tr;	58.1	4.4e-47
TRINITY_DN13104_c0_g1	I1FZK9_AMPQE/35-253	I1FZK9.1 PF00149.26;Metallophos;	57.5	4e-73
TRINITY_DN13105_c0_g1	I1GEA0_AMPQE/10-77	I1GEA0.1 PF03847.11;TFIID_20kDa;	73.1	7.5e-20
TRINITY_DN13105_c0_g2	A7RRT7_NEMVE/240-343	A7RRT7.1 PF08777.9;RRM_3;	50	5.9e-16
TRINITY_DN13111_c0_g2	I1FWV5_AMPQE/49-541	I1FWV5.1 PF03600.14;CitMHS;	46.2	6.8e-102
TRINITY_DN13115_c0_g2	I1F3T8_AMPQE/7-122	I1F3T8.1 PF08477.11;Roc;	75	4.3e-06
TRINITY_DN13118_c0_g2	U3JF50_FICAL/1-271	U3JF50.1 PF07773.9;DUF1619;	30.2	7.7e-15
TRINITY_DN13120_c0_g1	A0A0J7Z2W6_STRVR/7-199	A0A0J7Z2W6.1 PF13460.4;NAD_binding_10;	40.5	1.1e-25
TRINITY_DN13122_c0_g2	W5MII4_LEPOC/49-205	W5MII4.1 PF03801.11;Ndc80_HEC;	46.3	6.3e-29
TRINITY_DN13127_c0_g1	I1G6N7_AMPQE/3-104	I1G6N7.1 PF12998.5;ING;	57.8	1.1e-25
TRINITY_DN13129_c0_g1	T1FUF8_HELRO/1718-1779	T1FUF8.1 PF04117.10;Mpv17_PMP22;	45.8	7.6e-08
TRINITY_DN13130_c0_g1	I1EW82_AMPQE/74-285	I1EW82.1 PF00147.16;Fibrinogen_C;	45.8	3e-39
TRINITY_DN13132_c0_g2	I1FWF5_AMPQE/42-213	I1FWF5.1 PF00270.27;DEAD;	88.4	6.3e-82
TRINITY_DN13133_c0_g2	I1G5C9_AMPQE/1-375	I1G5C9.1 PF09404.8;DUF2003;	40.4	1.4e-52
TRINITY_DN13134_c0_g1	T1JFN1_STRMM/36-294	T1JFN1.1 PF01650.16;Peptidase_C13;	64.3	2.7e-91
TRINITY_DN13135_c0_g1	I1FDE8_AMPQE/6-195	I1FDE8.1 PF06682.10;SARAF;	70.2	4.3e-38
TRINITY_DN13144_c0_g2	I1GCR7_AMPQE/122-250	I1GCR7.1 PF01529.18;zf-DHHC;	59.1	2.1e-20
TRINITY_DN13145_c0_g1	I1FML6_AMPQE/25-155	I1FML6.1 PF00134.21;Cyclin_N;	59.5	1.2e-42
TRINITY_DN13145_c0_g2	V4AEG7_LOTGI/5-169	V4AEG7.1 PF01965.22;DJ-1_PfpI;	76.9	4.6e-44
TRINITY_DN13147_c0_g1	V4BCS2_LOTGI/5-209	V4BCS2.1 PF01852.17;START;	37.3	4.2e-27
TRINITY_DN13150_c0_g1	I1FJW8_AMPQE/8-72	I1FJW8.1 PF02953.13;zf-Tim10_DDP;	79.3	2e-20
TRINITY_DN13150_c1_g1	I1GA54_AMPQE/92-325	I1GA54.1 PF03006.18;HlyIII;	62.2	7.9e-79
TRINITY_DN13151_c0_g1	E2AT34_CAMFO/9-246	E2AT34.1 PF14291.4;DUF4371;	59.1	1.3e-40
TRINITY_DN13152_c0_g1	I1EYL2_AMPQE/28-131	I1EYL2.1 PF00169.27;PH;	47.6	4e-22
TRINITY_DN13155_c0_g1	K1QCP6_CRAGI/1-281	K1QCP6.1 PF03142.13;Chitin_synth_2;	31.8	3.8e-10
TRINITY_DN13157_c1_g1	I1FPM9_AMPQE/61-183	I1FPM9.1 PF00173.26;Cyt-b5;	62.2	3.3e-38
TRINITY_DN13159_c0_g2	J9EG44_WUCBA/1-132	J9EG44.1 PF00179.24;UQ_con;	71.2	9.1e-54
TRINITY_DN13161_c0_g1	I1EPW8_AMPQE/11-320	I1EPW8.1 PF00225.21;Kinesin;	33	2.6e-38
TRINITY_DN13166_c0_g1	I1FNA2_AMPQE/89-200	I1FNA2.1 PF00043.23;GST_C;	46.4	4.5e-25
TRINITY_DN13166_c0_g2	G3H5C9_CRIGR/28-82	G3H5C9.1 PF01667.15;Ribosomal_S27e;	94.5	4.8e-24
TRINITY_DN13166_c0_g3	A7RY17_NEMVE/8-181	A7RY17.1 PF09302.9;XLF;	35.8	5.4e-20
TRINITY_DN13167_c0_g1	F6PY07_XENTR/49-609	F6PY07.1 PF10243.7;MIP-T3;	56.5	3.3e-19
TRINITY_DN13169_c0_g1	I1FZF0_AMPQE/39-152	I1FZF0.1 PF06417.10;DUF1077;	63.3	8.9e-32
TRINITY_DN13169_c0_g2	I1FZM7_AMPQE/65-321	I1FZM7.1 PF09804.7;DUF2347;	58.8	1.8e-86
TRINITY_DN13171_c1_g1	I1EIP2_AMPQE/56-154	I1EIP2.1 PF02466.17;Tim17;	63.5	9.1e-29
TRINITY_DN13175_c0_g1	C3XWE6_BRAFL/90-232	C3XWE6.1 PF16565.3;MIT_C;	54.9	3.4e-38
TRINITY_DN13176_c0_g1	H3AH74_LATCH/154-299	H3AH74.1 PF14186.4;Aida_C2;	56.2	8.2e-37
TRINITY_DN13177_c0_g1	W5P165_SHEEP/117-169	W5P165.1 PF13833.4;EF-hand_8;	93	6.4e-13
TRINITY_DN13179_c0_g1	A7T0C1_NEMVE/1-190	A7T0C1.1 PF01201.20;Ribosomal_S8e;	73.3	2e-78
TRINITY_DN1317_c0_g1	A7STG6_NEMVE/24-74	A7STG6.1 PF00327.18;Ribosomal_L30;	74.5	5.8e-15
TRINITY_DN13180_c0_g1	Q17AX7_AEDAE/111-333	Q17AX7.1 PF01556.16;DnaJ_C;	60.5	9.7e-81
TRINITY_DN13185_c0_g3	I1GA53_AMPQE/1-172	I1GA53.1 PF04062.12;P21-Arc;	70.9	1.4e-68
TRINITY_DN13187_c0_g1	I1GH21_AMPQE/382-486	I1GH21.1 PF00085.18;Thioredoxin;	69.5	7.6e-38
TRINITY_DN13188_c0_g1	I1G3Y2_AMPQE/46-374	I1G3Y2.1 PF08627.8;CRT-like;	59.5	8.2e-50
TRINITY_DN13189_c0_g1	I1GC95_AMPQE/436-921	I1GC95.1 PF08441.10;Integrin_alpha2;	38.9	4.5e-07
TRINITY_DN13192_c0_g1	I1F8Q2_AMPQE/318-485	I1F8Q2.1 PF00071.20;Ras;	45.5	3.5e-31
TRINITY_DN13197_c0_g1	I1FL27_AMPQE/791-1064	I1FL27.1 PF15787.3;DUF4704;	42.1	8.3e-12
TRINITY_DN13198_c0_g1	I3K4H1_ORENI/6-186	I3K4H1.1 PF01470.15;Peptidase_C15;	49.2	1.9e-45
TRINITY_DN13199_c0_g1	F7FE75_MONDO/70-325	F7FE75.1 PF03009.15;GDPD;	42	1.5e-39
TRINITY_DN13203_c0_g1	I1FPF0_AMPQE/81-258	I1FPF0.1 PF08892.9;YqcI_YcgG;	73.6	1.7e-79
TRINITY_DN13205_c0_g1	E0VLV7_PEDHC/186-332	E0VLV7.1 PF16566.3;CREPT;	41.4	3.2e-23
TRINITY_DN13207_c0_g1	V4M9R3_EUTSA/42-120	V4M9R3.1 PF01439.16;Metallothio_2;	72.1	3.1e-08
TRINITY_DN13209_c0_g1	I1G4R3_AMPQE/43-296	I1G4R3.1 PF01571.19;GCV_T;	65.7	9.2e-91
TRINITY_DN1320_c0_g1	K7L1G3_SOYBN/1-78	K7L1G3.1 PF01439.16;Metallothio_2;	86.4	4.2e-23
TRINITY_DN13211_c0_g1	I1G6J6_AMPQE/66-105	I1G6J6.1 PF05920.9;Homeobox_KN;	90	4e-14
TRINITY_DN13215_c0_g1	I1EKW8_AMPQE/20-248	I1EKW8.1 PF04981.11;NMD3;	74.8	2e-88
TRINITY_DN13216_c0_g1	I1GI97_AMPQE/244-305	I1GI97.1 PF00170.19;bZIP_1;	88.7	6.9e-22
TRINITY_DN13217_c0_g2	I1FRT0_AMPQE/167-396	I1FRT0.1 PF00566.16;RabGAP-TBC;	55	1.4e-66
TRINITY_DN13217_c0_g3	W5LFZ2_ASTMX/147-257	W5LFZ2.1 PF07500.12;TFIIS_M;	58.9	1.8e-26
TRINITY_DN13219_c0_g2	I1GJG1_AMPQE/13-79	I1GJG1.1 PF13499.4;EF-hand_7;	84.4	2.8e-26
TRINITY_DN13225_c0_g1	E9GNE8_DAPPU/9-146	E9GNE8.1 PF00080.18;Sod_Cu;	66.7	1.4e-22
TRINITY_DN13225_c0_g2	I1FBW7_AMPQE/2-625	I1FBW7.1 PF09726.7;Macoilin;	37.8	4.6e-85
TRINITY_DN13225_c0_g3	W9RSS6_9ROSA/9-147	W9RSS6.1 PF00080.18;Sod_Cu;	67.1	2.5e-21
TRINITY_DN13225_c0_g4	C3ZM91_BRAFL/9-150	C3ZM91.1 PF00080.18;Sod_Cu;	74.5	7.2e-15
TRINITY_DN13228_c0_g1	A7RWL7_NEMVE/44-277	A7RWL7.1 PF02784.14;Orn_Arg_deC_N;	57.6	3.5e-45
TRINITY_DN13231_c0_g1	E9HWB6_DAPPU/16-153	E9HWB6.1 PF01951.14;Archease;	71	1e-52
TRINITY_DN13233_c0_g2	F1N4X0_BOVIN/169-348	F1N4X0.1 PF13429.4;TPR_15;	58.4	4e-51
TRINITY_DN13236_c0_g1	K1R314_CRAGI/10-76	K1R314.1 PF00076.20;RRM_1;	64.2	5.2e-18
TRINITY_DN13236_c0_g6	E9IN49_SOLIN/1912-2120	E9IN49.1 PF00373.16;FERM_M;	51.4	8e-54
TRINITY_DN13239_c0_g2	D5MMH8_9BACT/13-332	D5MMH8.1 PF00962.20;A_deaminase;	31.3	4.6e-28
TRINITY_DN13239_c0_g3	D6WYX5_TRICA/580-707	D6WYX5.1 PF12796.5;Ank_2;	38.9	6.1e-06
TRINITY_DN13243_c0_g2	A0A087Y7B1_POEFO/64-151	A0A087Y7B1.2 PF02214.20;BTB_2;	37	5e-09
TRINITY_DN13246_c0_g2	G7JVL4_MEDTR/150-196	G7JVL4.1 PF10839.6;DUF2647;	91.5	5.9e-16
TRINITY_DN13247_c0_g1	I1EJI8_AMPQE/284-502	I1EJI8.1 PF02167.13;Cytochrom_C1;	74.4	2.6e-97
TRINITY_DN13248_c0_g2	I1GH87_AMPQE/142-249	I1GH87.1 PF00651.29;BTB;	52.8	5.3e-27
TRINITY_DN13249_c2_g9	I1FIZ2_AMPQE/4-88	I1FIZ2.1 PF01780.17;Ribosomal_L37ae;	82.4	1e-34
TRINITY_DN13251_c0_g1	A7RUF4_NEMVE/23-312	A7RUF4.1 PF00206.18;Lyase_1;	48.2	1.7e-85
TRINITY_DN13258_c0_g1	T1J7H6_STRMM/30-356	T1J7H6.1 PF03265.13;DNase_II;	31.9	4.3e-25
TRINITY_DN13260_c0_g1	I1G2X5_AMPQE/47-242	I1G2X5.1 PF00149.26;Metallophos;	92.4	1.9e-68
TRINITY_DN13261_c0_g1	C3XZY1_BRAFL/43-345	C3XZY1.1 PF00561.18;Abhydrolase_1;	53.8	6.9e-54
TRINITY_DN13263_c0_g1	I1FLA5_AMPQE/71-164	I1FLA5.1 PF00254.26;FKBP_C;	78.7	7.2e-40
TRINITY_DN13266_c0_g1	I1G7S5_AMPQE/7-129	I1G7S5.1 PF01873.15;eIF-5_eIF-2B;	81.9	6.4e-46
TRINITY_DN13271_c0_g1	I1GD31_AMPQE/21-229	I1GD31.1 PF01712.17;dNK;	66.5	8e-86
TRINITY_DN13273_c0_g1	W5N5D0_LEPOC/33-381	W5N5D0.1 PF00009.25;GTP_EFTU;	64.5	2.5e-19
TRINITY_DN13274_c0_g1	M7C764_CHEMY/633-676	M7C764.1 PF13639.4;zf-RING_2;	55.8	8.9e-10
TRINITY_DN13278_c0_g1	I1GHU0_AMPQE/3-121	I1GHU0.1 PF08923.8;MAPKK1_Int;	63	8.3e-35
TRINITY_DN13278_c0_g4	A8MCJ0_CALMQ/1-120	A8MCJ0.1 PF01408.20;GFO_IDH_MocA;	34.7	1e-10
TRINITY_DN13282_c0_g2	A7RT58_NEMVE/2-235	A7RT58.1 PF00483.21;NTP_transferase;	75.5	1.4e-99
TRINITY_DN13287_c0_g1	A0A0B2W5R0_TOXCA/8-169	A0A0B2W5R0.1 PF00071.20;Ras;	91.9	2.9e-80
TRINITY_DN13290_c0_g1	D3B222_POLPA/175-242	D3B222.1 PF13802.4;Gal_mutarotas_2;	64.2	3.5e-14
TRINITY_DN13296_c0_g3	D6WZ08_TRICA/178-282	D6WZ08.1 PF13646.4;HEAT_2;	57.1	3.4e-27
TRINITY_DN13303_c1_g1	F6X686_XENTR/39-232	F6X686.1 PF00149.26;Metallophos;	83.5	6.1e-107
TRINITY_DN13303_c1_g3	M3ZZ68_XIPMA/33-343	M3ZZ68.1 PF07992.12;Pyr_redox_2;	56.9	1.3e-101
TRINITY_DN13307_c0_g1	A7S6J5_NEMVE/240-399	A7S6J5.1 PF03367.11;zf-ZPR1;	59.4	5.5e-52
TRINITY_DN13316_c0_g4	L5M6A1_MYODS/335-433	L5M6A1.1 PF06565.10;DUF1126;	41.8	3.1e-14
TRINITY_DN13316_c0_g8	H2XT62_CIOIN/25-135	H2XT62.1 PF00651.29;BTB;	54	3.6e-07
TRINITY_DN13319_c0_g1	W5NBM7_LEPOC/758-954	W5NBM7.1 PF04548.14;AIG1;	51.3	2.4e-49
TRINITY_DN13324_c0_g1	O01591_CAEEL/29-274	O01591.1 PF00702.24;Hydrolase;	36.1	1.6e-39
TRINITY_DN13325_c0_g1	H3B0B0_LATCH/82-329	H3B0B0.1 PF13532.4;2OG-FeII_Oxy_2;	37.4	1.9e-53
TRINITY_DN13327_c0_g1	I1FV51_AMPQE/22-61	I1FV51.1 PF13923.4;zf-C3HC4_2;	55	4.2e-08
TRINITY_DN13328_c0_g2	I1GIW8_AMPQE/33-272	I1GIW8.1 PF01151.16;ELO;	57.8	1.8e-80
TRINITY_DN13330_c3_g3	I1FAC8_AMPQE/9-194	I1FAC8.1 PF06918.12;DUF1280;	63.1	3.7e-18
TRINITY_DN13333_c1_g1	I1FUN0_AMPQE/619-708	I1FUN0.1 PF00595.22;PDZ;	71.1	1.7e-30
TRINITY_DN13333_c2_g2	I1FUN1_AMPQE/133-280	I1FUN1.1 PF03031.16;NIF;	60.1	3.9e-49
TRINITY_DN13333_c3_g2	V4AKW9_LOTGI/9-168	V4AKW9.1 PF02099.15;Josephin;	75	4.3e-18
TRINITY_DN13336_c0_g1	K1P2N0_CRAGI/65-141	K1P2N0.1 PF03134.17;TB2_DP1_HVA22;	67.1	3.1e-24
TRINITY_DN13337_c0_g1	A7SHU0_NEMVE/92-174	A7SHU0.1 PF01868.14;UPF0086;	57.3	9.5e-22
TRINITY_DN13337_c0_g2	T1IJ71_STRMM/439-703	T1IJ71.1 PF07714.15;Pkinase_Tyr;	37.5	7.6e-44
TRINITY_DN13338_c0_g1	F8KYU9_PARAV/10-440	F8KYU9.1 PF01222.15;ERG4_ERG24;	48.3	3.2e-142
TRINITY_DN13339_c0_g1	I1FUE2_AMPQE/1475-1611	I1FUE2.1 PF02210.22;Laminin_G_2;	44.4	7.1e-10
TRINITY_DN13347_c0_g1	I3KB36_ORENI/57-287	I3KB36.1 PF00378.18;ECH_1;	64.1	2.5e-51
TRINITY_DN13348_c0_g1	G1PCF9_MYOLU/183-241	G1PCF9.1 PF02176.16;zf-TRAF;	43.9	5.4e-07
TRINITY_DN13350_c0_g1	I1F8S4_AMPQE/910-1008	I1F8S4.1 PF00530.16;SRCR;	50	4.9e-19
TRINITY_DN13354_c0_g1	Q16QR9_AEDAE/157-295	Q16QR9.1 PF01161.18;PBP;	46.3	1.1e-07
TRINITY_DN13354_c0_g2	T1KMJ8_TETUR/13-116	T1KMJ8.1 PF02991.14;Atg8;	35.5	3.4e-10
TRINITY_DN13354_c0_g6	B7PTS0_IXOSC/9-345	B7PTS0.1 PF00478.23;IMPDH;	77.6	1.8e-149
TRINITY_DN13354_c0_g7	H3BH67_LATCH/80-264	H3BH67.1 PF01762.19;Galactosyl_T;	55.9	3e-52
TRINITY_DN13358_c0_g1	RING1_HUMAN/48-87	Q06587.2 PF00097.23;zf-C3HC4;	87.5	5.7e-15
TRINITY_DN13360_c0_g1	A7RZ65_NEMVE/344-383	A7RZ65.1 PF00400.30;WD40;	60	1.5e-07
TRINITY_DN13361_c0_g1	A0A067K4A7_JATCU/4-107	A0A067K4A7.1 PF00044.22;Gp_dh_N;	93.3	3.1e-51
TRINITY_DN13362_c0_g1	A7RIM0_NEMVE/13-195	A7RIM0.1 PF01467.24;CTP_transf_like;	47.3	1.2e-17
TRINITY_DN13363_c0_g1	A7SRW1_NEMVE/12-252	A7SRW1.1 PF03998.11;Utp11;	42.1	1.2e-40
TRINITY_DN13364_c0_g1	Q17EB8_AEDAE/11-143	Q17EB8.1 PF00337.20;Gal-bind_lectin;	37.4	2.4e-07
TRINITY_DN13365_c0_g2	I1FZZ2_AMPQE/344-625	I1FZZ2.1 PF03034.13;PSS;	63.5	6.5e-114
TRINITY_DN13366_c0_g1	I1G9I7_AMPQE/418-525	I1G9I7.1 PF00651.29;BTB;	59.6	7.8e-28
TRINITY_DN13369_c1_g1	E7EN44_HUMAN/12-323	E7EN44.1 PF02190.14;LON_substr_bdg;	36.5	8.1e-49
TRINITY_DN13369_c1_g5	A7RPZ4_NEMVE/1-133	A7RPZ4.1 PF01625.19;PMSR;	64.9	1.6e-45
TRINITY_DN13369_c1_g6	A7S3U4_NEMVE/3-52	A7S3U4.1 PF04135.10;Nop10p;	84	3.4e-17
TRINITY_DN13371_c0_g1	U9SW55_RHIID/233-302	U9SW55.1 PF00013.27;KH_1;	55.1	2.2e-14
TRINITY_DN13375_c0_g1	I1G452_AMPQE/281-634	I1G452.1 PF00773.17;RNB;	51.2	8.2e-29
TRINITY_DN13375_c0_g4	V4B8T0_LOTGI/446-796	V4B8T0.1 PF00773.17;RNB;	61.3	3.8e-59
TRINITY_DN13376_c0_g2	B7PE56_IXOSC/636-766	B7PE56.1 PF00168.28;C2;	34.1	2.2e-11
TRINITY_DN13377_c0_g3	I1G4W7_AMPQE/43-364	I1G4W7.1 PF01301.17;Glyco_hydro_35;	72	5.7e-140
TRINITY_DN13378_c0_g2	A7E986_SCLS1/260-304	A7E986.1 PF13639.4;zf-RING_2;	46.5	9e-07
TRINITY_DN13378_c0_g3	I1G2G3_AMPQE/49-215	I1G2G3.1 PF15093.4;DUF4555;	48.9	6.2e-15
TRINITY_DN13379_c0_g2	V3ZH47_LOTGI/13-189	V3ZH47.1 PF00702.24;Hydrolase;	55	5.7e-33
TRINITY_DN13380_c0_g2	I1F2R4_AMPQE/153-248	I1F2R4.1 PF05495.10;zf-CHY;	71.6	8.3e-38
TRINITY_DN13380_c0_g3	I1G1Y7_AMPQE/22-300	I1G1Y7.1 PF00067.20;p450;	54.5	7.1e-33
TRINITY_DN13381_c0_g1	I1E5N8_AMPQE/60-168	I1E5N8.1 PF00665.24;rve;	59.2	1e-27
TRINITY_DN13382_c0_g1	I1FUA3_AMPQE/644-751	I1FUA3.1 PF02204.16;VPS9;	66.3	6.6e-34
TRINITY_DN13382_c0_g2	I1FUA3_AMPQE/73-150	I1FUA3.1 PF00017.22;SH2;	44.9	3e-13
TRINITY_DN13388_c0_g2	G4ZLA7_PHYSP/90-151	G4ZLA7.1 PF13843.4;DDE_Tnp_1_7;	41.5	3.3e-06
TRINITY_DN13389_c0_g1	W5L5A0_ASTMX/138-377	W5L5A0.1 PF00656.20;Peptidase_C14;	33.3	2.9e-17
TRINITY_DN13392_c0_g1	M3ZU18_XIPMA/42-214	M3ZU18.1 PF00270.27;DEAD;	62	9.6e-55
TRINITY_DN13394_c0_g1	I3IXY7_ORENI/59-233	I3IXY7.1 PF08598.9;Sds3;	43.9	7.5e-27
TRINITY_DN13394_c0_g2	C3XZ01_BRAFL/2-89	C3XZ01.1 PF02961.12;BAF;	81.8	2.5e-37
TRINITY_DN13397_c0_g1	H5WLR1_9BURK/5-104	H5WLR1.1 PF09361.8;Phasin_2;	82.1	2.5e-31
TRINITY_DN13401_c0_g5	A0A067QY87_ZOONE/218-312	A0A067QY87.1 PF03129.18;HGTP_anticodon;	47.9	6.1e-16
TRINITY_DN13402_c0_g1	V4AJ81_LOTGI/234-705	V4AJ81.1 PF07779.10;Cas1_AcylT;	24.6	5.8e-24
TRINITY_DN13403_c0_g1	I1GJF2_AMPQE/134-238	I1GJF2.1 PF02174.15;IRS;	73.5	1.2e-36
TRINITY_DN13405_c0_g1	I1G3Y8_AMPQE/366-838	I1G3Y8.1 PF03200.14;Glyco_hydro_63;	60.5	3.5e-107
TRINITY_DN13406_c0_g1	G4VEK3_SCHMA/27-88	G4VEK3.1 PF00226.29;DnaJ;	69.4	3e-17
TRINITY_DN13413_c0_g1	I1EYZ4_AMPQE/239-283	I1EYZ4.1 PF13639.4;zf-RING_2;	75	4e-15
TRINITY_DN13415_c0_g1	A7RV43_NEMVE/36-209	A7RV43.1 PF00213.16;OSCP;	48.3	6e-32
TRINITY_DN13416_c0_g1	I1G7P9_AMPQE/176-344	I1G7P9.1 PF02182.15;SAD_SRA;	81.7	6.7e-79
TRINITY_DN13418_c0_g2	I1G699_AMPQE/156-262	I1G699.1 PF08616.8;SPA;	62.6	3.6e-28
TRINITY_DN13425_c2_g3	RK14_SOLLC/1-122	Q2MI64.1 PF00238.17;Ribosomal_L14;	89.9	1e-32
TRINITY_DN13426_c1_g1	A7SQ05_NEMVE/103-198	A7SQ05.1 PF07540.9;NOC3p;	51	1.7e-19
TRINITY_DN13427_c0_g1	A0A0B0MYQ4_GOSAR/54-110	A0A0B0MYQ4.1 PF01849.16;NAC;	86	1.3e-15
TRINITY_DN13428_c0_g1	A7SXY8_NEMVE/409-612	A7SXY8.1 PF01434.16;Peptidase_M41;	57.8	1.3e-63
TRINITY_DN13429_c0_g2	I1F5V0_AMPQE/78-273	I1F5V0.1 PF00112.21;Peptidase_C1;	44.1	1.9e-28
TRINITY_DN13432_c0_g5	I1FTL5_AMPQE/47-291	I1FTL5.1 PF00194.19;Carb_anhydrase;	35	7.7e-35
TRINITY_DN13434_c0_g1	C3ZNR9_BRAFL/14-62	C3ZNR9.1 PF14604.4;SH3_9;	58.7	4.2e-09
TRINITY_DN13438_c1_g7	I1EDT9_AMPQE/13-130	I1EDT9.1 PF09748.7;Med10;	51.9	1e-31
TRINITY_DN13439_c0_g1	I1EJB7_AMPQE/31-214	I1EJB7.1 PF13462.4;Thioredoxin_4;	50.5	7e-16
TRINITY_DN13439_c0_g3	I1FBN4_AMPQE/21-296	I1FBN4.1 PF00735.16;Septin;	79.9	5.2e-128
TRINITY_DN13439_c0_g4	B2DCZ7_PIG/13-127	B2DCZ7.1 PF01412.16;ArfGap;	81.5	7.2e-27
TRINITY_DN13443_c0_g1	MUP6_MOUSE/34-173	P02762.2 PF00061.21;Lipocalin;	99.3	2.1e-75
TRINITY_DN13444_c2_g1	C3Z870_BRAFL/20-465	C3Z870.1 PF05761.12;5_nucleotid;	46.4	1.1e-121
TRINITY_DN13445_c2_g1	I1GHE0_AMPQE/17-318	I1GHE0.1 PF05462.9;Dicty_CAR;	32.5	7.3e-32
TRINITY_DN13449_c0_g3	W4XDF4_STRPU/546-643	W4XDF4.1 PF00530.16;SRCR;	52.8	2.2e-16
TRINITY_DN13449_c0_g8	K1QYJ1_CRAGI/212-307	K1QYJ1.1 PF00530.16;SRCR;	51.6	3.7e-18
TRINITY_DN13450_c0_g1	B7GKB3_ANOFW/132-196	B7GKB3.1 PF12836.5;HHH_3;	43.1	3.1e-07
TRINITY_DN13451_c3_g1	W5KAK4_ASTMX/25-276	W5KAK4.1 PF00069.23;Pkinase;	87.4	4.4e-38
TRINITY_DN13451_c3_g5	A0A087YGB1_POEFO/20-271	A0A087YGB1.2 PF00069.23;Pkinase;	68.5	5.8e-33
TRINITY_DN13452_c0_g1	I1FV89_AMPQE/630-683	I1FV89.1 PF00130.20;C1_1;	59.3	1e-12
TRINITY_DN13452_c0_g4	I1GK95_AMPQE/9-279	I1GK95.1 PF01263.18;Aldose_epim;	51.6	8.3e-38
TRINITY_DN13452_c0_g5	I1FKQ5_AMPQE/49-116	I1FKQ5.1 PF00462.22;Glutaredoxin;	55.9	7.3e-14
TRINITY_DN13452_c0_g9	I1GK95_AMPQE/9-279	I1GK95.1 PF01263.18;Aldose_epim;	59.8	1.8e-30
TRINITY_DN13452_c1_g1	T2GA88_DESGI/300-467	T2GA88.1 PF03441.12;FAD_binding_7;	60.8	3.2e-57
TRINITY_DN13453_c0_g17	Q8S6Z2_ORYSJ/980-1121	Q8S6Z2.1 PF00078.25;RVT_1;	40.6	1.2e-06
TRINITY_DN13453_c0_g6	I1FUV9_AMPQE/36-232	I1FUV9.1 PF00106.23;adh_short;	51.8	1.2e-38
TRINITY_DN13454_c0_g1	H3CY29_TETNG/7-132	H3CY29.1 PF00091.23;Tubulin;	86.3	6e-49
TRINITY_DN13454_c2_g1	F2U5D6_SALR5/3-214	F2U5D6.1 PF00091.23;Tubulin;	94.8	1.3e-105
TRINITY_DN13454_c2_g2	V3ZLQ5_LOTGI/6-218	V3ZLQ5.1 PF00091.23;Tubulin;	100	4.6e-09
TRINITY_DN13455_c0_g1	D8M1W7_BLAHO/168-334	D8M1W7.1 PF02421.16;FeoB_N;	60.6	2.4e-53
TRINITY_DN13459_c0_g1	I1FCQ1_AMPQE/157-302	I1FCQ1.1 PF00917.24;MATH;	39.9	1.7e-22
TRINITY_DN13463_c0_g2	I1G6B6_AMPQE/95-530	I1G6B6.1 PF15902.3;Sortilin-Vps10;	39.6	1.2e-77
TRINITY_DN13467_c0_g1	H3CD51_TETNG/14-247	H3CD51.1 PF13561.4;adh_short_C2;	57.4	1.3e-64
TRINITY_DN13471_c0_g5	G1K976_ANOCA/94-516	G1K976.2 PF05602.10;CLPTM1;	57.2	1.5e-60
TRINITY_DN13471_c1_g1	I1GH64_AMPQE/78-282	I1GH64.1 PF03798.14;TRAM_LAG1_CLN8;	47.3	5.7e-47
TRINITY_DN13472_c1_g1	A0A0D2W094_CAPO3/47-174	A0A0D2W094.1 PF00583.23;Acetyltransf_1;	51.5	5.2e-31
TRINITY_DN13474_c0_g1	A7T1D5_NEMVE/112-176	A7T1D5.1 PF13499.4;EF-hand_7;	66.2	2.5e-17
TRINITY_DN13475_c0_g3	M3XKS9_LATCH/198-449	M3XKS9.1 PF00009.25;GTP_EFTU;	63.9	2.2e-85
TRINITY_DN13480_c3_g3	I1EBF7_AMPQE/1-159	I1EBF7.1 PF00078.25;RVT_1;	73.3	3.7e-31
TRINITY_DN13486_c0_g1	M7BWU7_CHEMY/3-221	M7BWU7.1 PF01501.18;Glyco_transf_8;	60.2	2.8e-74
TRINITY_DN13487_c0_g1	T1HE96_RHOPR/6-151	T1HE96.1 PF00339.27;Arrestin_N;	31.6	1.3e-10
TRINITY_DN13488_c0_g1	D8LKX8_ECTSI/231-443	D8LKX8.1 PF00149.26;Metallophos;	43.3	2e-55
TRINITY_DN13489_c3_g1	V3Z7A0_LOTGI/470-621	V3Z7A0.1 PF00160.19;Pro_isomerase;	79.3	2.2e-64
TRINITY_DN13489_c4_g3	A7SV15_NEMVE/818-906	A7SV15.1 PF08512.10;Rtt106;	77.3	6e-35
TRINITY_DN13489_c4_g4	I1G5P6_AMPQE/180-412	I1G5P6.1 PF00557.22;Peptidase_M24;	68.2	6.2e-91
TRINITY_DN13491_c2_g2	I1ESP2_AMPQE/184-277	I1ESP2.1 PF05699.12;Dimer_Tnp_hAT;	52.1	8.9e-19
TRINITY_DN13492_c0_g1	I1FZK9_AMPQE/35-253	I1FZK9.1 PF00149.26;Metallophos;	54.3	1.2e-67
TRINITY_DN13492_c0_g2	I1FZL1_AMPQE/1-215	I1FZL1.1 PF00149.26;Metallophos;	63.1	1.9e-78
TRINITY_DN13492_c0_g4	I1FZL1_AMPQE/1-215	I1FZL1.1 PF00149.26;Metallophos;	69.3	2.4e-27
TRINITY_DN13492_c0_g5	I1GJF7_AMPQE/48-303	I1GJF7.1 PF01048.18;PNP_UDP_1;	62.4	7.6e-92
TRINITY_DN13494_c0_g1	I1FLA9_AMPQE/4-390	I1FLA9.1 PF00022.17;Actin;	57.2	1.2e-129
TRINITY_DN13495_c0_g1	I1FYP3_AMPQE/176-423	I1FYP3.1 PF00520.29;Ion_trans;	58.1	2.3e-78
TRINITY_DN13502_c0_g1	I1FIQ7_AMPQE/25-167	I1FIQ7.1 PF01926.21;MMR_HSR1;	78.7	2.3e-62
TRINITY_DN13503_c1_g14	A7SY84_NEMVE/35-165	A7SY84.1 PF08755.9;YccV-like;	53.1	5.8e-32
TRINITY_DN13503_c1_g3	T1FY02_HELRO/16-155	T1FY02.1 PF08397.9;IMD;	37.2	2.1e-16
TRINITY_DN13504_c0_g1	I1GC55_AMPQE/13-135	I1GC55.1 PF00241.18;Cofilin_ADF;	65.2	2.1e-08
TRINITY_DN13508_c0_g1	V4AEK5_LOTGI/1-213	V4AEK5.1 PF04845.11;PurA;	39.2	3.2e-23
TRINITY_DN13508_c0_g2	A7RL26_NEMVE/47-481	A7RL26.1 PF01704.16;UDPGP;	59.5	1.1e-103
TRINITY_DN13510_c0_g2	CK070_XENTR/15-260	Q5I0R4.1 PF14926.4;DUF4498;	51.7	9.5e-50
TRINITY_DN13512_c1_g1	M3Z1E9_MUSPF/509-740	M3Z1E9.1 PF09402.8;MSC;	71.4	1.4e-06
TRINITY_DN13512_c1_g3	D6WCA3_TRICA/686-732	D6WCA3.1 PF01585.21;G-patch;	72.7	1.9e-06
TRINITY_DN13512_c1_g8	I1FJM6_AMPQE/132-377	I1FJM6.1 PF09402.8;MSC;	33.5	1.9e-26
TRINITY_DN13513_c0_g1	I1G5H3_AMPQE/31-387	I1G5H3.1 PF07690.14;MFS_1;	33.6	7.5e-48
TRINITY_DN13518_c0_g1	B3RVG6_TRIAD/60-398	B3RVG6.1 PF03062.17;MBOAT;	58.8	3.4e-80
TRINITY_DN13520_c1_g7	W4YR97_STRPU/113-183	W4YR97.1 PF07258.12;COMM_domain;	56.3	1.8e-14
TRINITY_DN13521_c0_g1	A0A0L1KUX5_9EUGL/8-169	A0A0L1KUX5.1 PF00071.20;Ras;	39.1	6.8e-19
TRINITY_DN13523_c0_g1	A0A0R4J0X5_MOUSE/46-410	A0A0R4J0X5.1 PF00079.18;Serpin;	90.7	4.5e-71
TRINITY_DN13523_c0_g2	A0A0R4J0X5_MOUSE/46-410	A0A0R4J0X5.1 PF00079.18;Serpin;	99.3	2.4e-72
TRINITY_DN13526_c0_g1	A7S2B3_NEMVE/7-120	A7S2B3.1 PF01412.16;ArfGap;	61.1	1.9e-37
TRINITY_DN13528_c0_g1	I1G7K8_AMPQE/253-304	I1G7K8.1 PF00415.16;RCC1;	58.8	2.6e-09
TRINITY_DN13533_c0_g1	Q2NAP9_ERYLH/32-285	Q2NAP9.1 PF01636.21;APH;	34.4	2.3e-35
TRINITY_DN13537_c0_g1	I1FQ42_AMPQE/107-322	I1FQ42.1 PF13672.4;PP2C_2;	44.4	4e-34
TRINITY_DN13540_c2_g6	I1FN67_AMPQE/51-139	I1FN67.1 PF00957.19;Synaptobrevin;	69	1.1e-19
TRINITY_DN13540_c3_g1	H2UCF6_TAKRU/163-281	H2UCF6.1 PF08514.9;STAG;	54.6	1.2e-26
TRINITY_DN13542_c0_g2	F6ZYI9_ORNAN/5-57	F6ZYI9.1 PF00514.21;Arm;	58.5	4.8e-10
TRINITY_DN13549_c1_g1	L7UCS0_MYXSD/263-354	L7UCS0.1 PF03815.17;LCCL;	49.4	1.4e-16
TRINITY_DN13550_c1_g5	K1QHU4_CRAGI/271-490	K1QHU4.1 PF00667.18;FAD_binding_1;	67.6	1.1e-85
TRINITY_DN13555_c0_g5	I1G1W9_AMPQE/9-220	I1G1W9.1 PF01323.18;DSBA;	40.8	2e-40
TRINITY_DN13557_c0_g1	K1Q4C3_CRAGI/123-413	K1Q4C3.1 PF01557.16;FAA_hydrolase;	67.6	5e-130
TRINITY_DN13559_c0_g1	I1EUG7_AMPQE/1-66	I1EUG7.1 PF02689.12;Herpes_Helicase;	70.7	2.4e-14
TRINITY_DN13561_c1_g1	I1FEE8_AMPQE/2196-2382	I1FEE8.1 PF00644.18;PARP;	50	1.8e-10
TRINITY_DN13561_c1_g2	D8ST96_SELML/56-491	D8ST96.1 PF01593.22;Amino_oxidase;	35.3	9.3e-67
TRINITY_DN13561_c1_g6	F6PTL6_MONDO/1637-1822	F6PTL6.2 PF00644.18;PARP;	56.3	2.8e-48
TRINITY_DN13561_c1_g7	H3A3P0_LATCH/245-422	H3A3P0.1 PF00174.17;Oxidored_molyb;	57.5	1.8e-53
TRINITY_DN13561_c2_g1	A7RIT1_NEMVE/314-645	A7RIT1.1 PF00493.21;MCM;	84.6	1.1e-158
TRINITY_DN13564_c0_g2	K7J9P7_NASVI/25-120	K7J9P7.1 PF02100.15;ODC_AZ;	33	4.3e-06
TRINITY_DN13565_c2_g3	R0JBU7_ANAPL/8-303	R0JBU7.1 PF04321.15;RmlD_sub_bind;	50.7	3.4e-75
TRINITY_DN13567_c3_g2	A7SK00_NEMVE/44-366	A7SK00.1 PF01244.19;Peptidase_M19;	57.1	9.8e-106
TRINITY_DN13569_c0_g1	I1GH23_AMPQE/335-498	I1GH23.1 PF13870.4;DUF4201;	65.3	6.5e-46
TRINITY_DN13571_c1_g1	I1EVW9_AMPQE/3-717	I1EVW9.1 PF00012.18;HSP70;	52.5	5.7e-194
TRINITY_DN13572_c0_g1	H9GA06_ANOCA/29-303	H9GA06.1 PF00682.17;HMGL-like;	74.1	2e-114
TRINITY_DN13578_c0_g1	G6DM72_DANPL/272-362	G6DM72.1 PF00153.25;Mito_carr;	49.5	3.6e-18
TRINITY_DN13578_c0_g3	B7PGP7_IXOSC/29-119	B7PGP7.1 PF00153.25;Mito_carr;	62.4	6.8e-22
TRINITY_DN13579_c1_g3	I1FT60_AMPQE/545-623	I1FT60.1 PF05699.12;Dimer_Tnp_hAT;	51.8	4.5e-08
TRINITY_DN13585_c1_g1	I1GJ21_AMPQE/157-235	I1GJ21.1 PF00017.22;SH2;	79.5	3.8e-31
TRINITY_DN13585_c1_g2	H2USL9_TAKRU/76-592	H2USL9.1 PF10433.7;MMS1_N;	82.2	5.3e-259
TRINITY_DN13586_c0_g1	K1R3N3_CRAGI/47-274	K1R3N3.1 PF01223.21;Endonuclease_NS;	49.4	3.4e-43
TRINITY_DN13588_c0_g1	B8HZC0_CYAP4/152-400	B8HZC0.1 PF00201.16;UDPGT;	29.1	2.5e-19
TRINITY_DN13590_c0_g1	W5N7C8_LEPOC/33-178	W5N7C8.1 PF10208.7;Armet;	56.6	7.1e-41
TRINITY_DN13590_c1_g1	I1F6M4_AMPQE/866-979	I1F6M4.1 PF00856.26;SET;	64	6.5e-34
TRINITY_DN13591_c0_g1	A0A072V2I7_MEDTR/18-116	A0A072V2I7.1 PF00407.17;Bet_v_1;	71.6	2e-19
TRINITY_DN13592_c0_g1	A7SXA0_NEMVE/230-450	A7SXA0.1 PF00149.26;Metallophos;	62.5	3.6e-16
TRINITY_DN13592_c0_g2	I1FD44_AMPQE/125-292	I1FD44.1 PF04427.16;Brix;	66.5	8.9e-63
TRINITY_DN13592_c0_g4	A7SZW4_NEMVE/283-502	A7SZW4.1 PF00149.26;Metallophos;	66	4.3e-55
TRINITY_DN13593_c0_g1	I1G5S4_AMPQE/821-867	I1G5S4.1 PF00400.30;WD40;	58.7	1.6e-09
TRINITY_DN13594_c0_g1	I1FWB0_AMPQE/43-134	I1FWB0.1 PF12796.5;Ank_2;	74.6	2.1e-17
TRINITY_DN13594_c0_g2	RBBP4_DANRE/19-88	Q6P3H7.3 PF12265.6;CAF1C_H4-bd;	92.9	1e-32
TRINITY_DN13595_c0_g1	K9X7X6_9NOST/24-485	K9X7X6.1 PF00171.20;Aldedh;	65.7	2.1e-86
TRINITY_DN13595_c0_g2	A7RLS5_NEMVE/51-514	A7RLS5.1 PF00171.20;Aldedh;	76.7	1.3e-103
TRINITY_DN13597_c5_g1	A0A0N5DF24_TRIMR/12-173	A0A0N5DF24.1 PF00071.20;Ras;	67.9	9e-24
TRINITY_DN13597_c5_g3	W5KDF1_ASTMX/28-386	W5KDF1.1 PF14778.4;ODR4-like;	36.6	1.3e-16
TRINITY_DN13597_c6_g1	I1G678_AMPQE/403-514	I1G678.1 PF14792.4;DNA_pol_B_palm;	64.3	2.3e-39
TRINITY_DN13597_c6_g3	I1G678_AMPQE/15-95	I1G678.1 PF00533.24;BRCT;	48.6	8.2e-09
TRINITY_DN13598_c0_g1	I1FWH0_AMPQE/44-135	I1FWH0.1 PF00041.19;fn3;	35.1	1.3e-08
TRINITY_DN13599_c0_g1	T1JFU8_STRMM/497-572	T1JFU8.1 PF00017.22;SH2;	46.8	2.9e-15
TRINITY_DN13600_c3_g2	V4AJ48_LOTGI/590-862	V4AJ48.1 PF04685.11;DUF608;	46.8	3.3e-28
TRINITY_DN13603_c0_g1	I1GBF3_AMPQE/241-626	I1GBF3.1 PF07714.15;Pkinase_Tyr;	57.6	5.2e-52
TRINITY_DN13605_c5_g1	I1GIT0_AMPQE/12-234	I1GIT0.1 PF03803.13;Scramblase;	75.3	3.8e-96
TRINITY_DN13609_c2_g1	I1GE20_AMPQE/99-291	I1GE20.1 PF14378.4;PAP2_3;	56.2	1.2e-61
TRINITY_DN13609_c3_g2	K1PCG4_CRAGI/145-224	K1PCG4.1 PF07524.11;Bromo_TP;	42	5.4e-07
TRINITY_DN13610_c1_g5	V4AJF7_LOTGI/1-245	V4AJF7.1 PF04849.11;HAP1_N;	33.7	8e-13
TRINITY_DN13611_c0_g1	I1GJI4_AMPQE/7-180	I1GJI4.1 PF00025.19;Arf;	63.6	1.1e-61
TRINITY_DN13614_c1_g1	K1QAE8_CRAGI/1419-1624	K1QAE8.1 PF14644.4;DUF4456;	34.6	7.7e-23
TRINITY_DN13614_c1_g5	A0A0N5AAC5_9BILA/1415-1471	A0A0N5AAC5.1 PF06701.11;MIB_HERC2;	50.9	4.4e-09
TRINITY_DN13616_c0_g1	F4CC27_SPHS2/24-228	F4CC27.1 PF01965.22;DJ-1_PfpI;	40.2	7.3e-36
TRINITY_DN13618_c0_g12	I1F3F9_AMPQE/863-1011	I1F3F9.1 PF02902.17;Peptidase_C48;	38.3	2.2e-11
TRINITY_DN13618_c0_g4	I1E641_AMPQE/154-314	I1E641.1 PF00078.25;RVT_1;	70	3.1e-64
TRINITY_DN13625_c1_g2	C3YJX6_BRAFL/17-59	C3YJX6.1 PF13445.4;zf-RING_UBOX;	51.2	1.1e-06
TRINITY_DN13625_c1_g8	I1G1Y5_AMPQE/21-223	I1G1Y5.1 PF05721.11;PhyH;	71.2	1.5e-63
TRINITY_DN13625_c1_g9	I1F8E4_AMPQE/25-227	I1F8E4.1 PF05721.11;PhyH;	76	4.4e-15
TRINITY_DN13627_c0_g1	W5LQJ5_ASTMX/5-206	W5LQJ5.1 PF01186.15;Lysyl_oxidase;	57.1	1.1e-35
TRINITY_DN13627_c0_g3	I1FQ37_AMPQE/527-734	I1FQ37.1 PF01186.15;Lysyl_oxidase;	50	7.5e-56
TRINITY_DN13631_c0_g1	V4B4A1_LOTGI/11-171	V4B4A1.1 PF00071.20;Ras;	77.5	1.2e-65
TRINITY_DN13631_c1_g1	G3VQU5_SARHA/8-125	G3VQU5.1 PF09822.7;ABC_transp_aux;	53.5	2.9e-30
TRINITY_DN13631_c1_g2	U4UAF9_DENPD/124-307	U4UAF9.1 PF01251.16;Ribosomal_S7e;	68.3	1.6e-65
TRINITY_DN13633_c1_g3	S9X887_9CETA/361-478	S9X887.1 PF01909.21;NTP_transf_2;	57.1	2.6e-07
TRINITY_DN13634_c3_g1	A0A0D2WM95_CAPO3/73-125	A0A0D2WM95.1 PF02238.13;COX7a;	50	6.8e-06
TRINITY_DN13634_c6_g2	B3RNM2_TRIAD/6-243	B3RNM2.1 PF00106.23;adh_short;	46.7	2.3e-32
TRINITY_DN13636_c0_g1	I1FTB3_AMPQE/279-386	I1FTB3.1 PF14598.4;PAS_11;	65.4	7.4e-37
TRINITY_DN13637_c0_g2	F6YM31_CIOIN/45-180	F6YM31.2 PF00782.18;DSPc;	44.4	1.6e-29
TRINITY_DN13638_c3_g5	I1GB69_AMPQE/95-306	I1GB69.1 PF13017.4;Maelstrom;	41.2	9.6e-43
TRINITY_DN13641_c0_g2	G1KPC3_ANOCA/381-566	G1KPC3.2 PF05241.10;EBP;	44.7	6.6e-15
TRINITY_DN13643_c3_g2	C3ZKK1_BRAFL/34-324	C3ZKK1.1 PF00069.23;Pkinase;	45.2	1.6e-75
TRINITY_DN13643_c3_g3	A7SE49_NEMVE/34-550	A7SE49.1 PF01019.19;G_glu_transpept;	61.5	1.9e-187
TRINITY_DN13643_c3_g4	I1FSX0_AMPQE/1106-1167	I1FSX0.1 PF00013.27;KH_1;	68.9	1.3e-16
TRINITY_DN13644_c0_g13	H2TIZ8_TAKRU/9-145	H2TIZ8.1 PF00179.24;UQ_con;	91.9	5.1e-70
TRINITY_DN13644_c0_g2	A7S1L5_NEMVE/71-266	A7S1L5.1 PF01171.18;ATP_bind_3;	51.1	2e-16
TRINITY_DN13649_c1_g1	A0A074W9Y4_9PEZI/15-105	A0A074W9Y4.1 PF14737.4;DUF4470;	40.6	8.4e-08
TRINITY_DN13650_c0_g1	A7RHN4_NEMVE/38-216	A7RHN4.1 PF02902.17;Peptidase_C48;	58.4	1.7e-59
TRINITY_DN13654_c0_g3	I1FVM6_AMPQE/96-417	I1FVM6.1 PF00069.23;Pkinase;	82.6	1.3e-154
TRINITY_DN13657_c0_g1	I1GEN8_AMPQE/596-851	I1GEN8.1 PF07714.15;Pkinase_Tyr;	55.8	4.1e-25
TRINITY_DN13659_c0_g1	E5S0B3_TRISP/944-1057	E5S0B3.1 PF00665.24;rve;	76.8	5.2e-19
TRINITY_DN13660_c0_g1	I1EJ41_AMPQE/6-122	I1EJ41.1 PF04263.14;TPK_catalytic;	46.4	7.7e-14
TRINITY_DN13661_c0_g2	I1FGU5_AMPQE/76-129	I1FGU5.1 PF00628.27;PHD;	77.4	2.7e-19
TRINITY_DN13662_c3_g2	H2SVU5_TAKRU/16-410	H2SVU5.1 PF03062.17;MBOAT;	39.5	1.7e-62
TRINITY_DN13662_c4_g1	A0A068XFV1_HYMMI/184-407	A0A068XFV1.1 PF00006.23;ATP-synt_ab;	94.2	9.6e-115
TRINITY_DN13663_c0_g2	I1EM12_AMPQE/54-215	I1EM12.1 PF04548.14;AIG1;	64	3e-43
TRINITY_DN13664_c0_g6	I1GFJ0_AMPQE/28-143	I1GFJ0.1 PF00665.24;rve;	62.2	4.5e-09
TRINITY_DN13665_c0_g1	I1G7Q8_AMPQE/157-210	I1G7Q8.1 PF01826.15;TIL;	51.9	8.4e-12
TRINITY_DN13666_c2_g2	W4ZHB7_STRPU/4-379	W4ZHB7.1 PF05914.10;RIB43A;	47.3	1.2e-70
TRINITY_DN13666_c2_g4	C3ZSI1_BRAFL/6-281	C3ZSI1.1 PF03643.13;Vps26;	58.6	1e-83
TRINITY_DN13667_c0_g2	A0A0D2U8Y2_CAPO3/228-513	A0A0D2U8Y2.1 PF00928.19;Adap_comp_sub;	44.1	2.8e-64
TRINITY_DN13669_c0_g2	H2ZZE9_LATCH/504-752	H2ZZE9.1 PF00078.25;RVT_1;	34.7	2.9e-16
TRINITY_DN13671_c2_g1	C3Z9P1_BRAFL/148-192	C3Z9P1.1 PF13639.4;zf-RING_2;	73.3	2.6e-13
TRINITY_DN13671_c2_g5	B3S8H3_TRIAD/300-496	B3S8H3.1 PF01434.16;Peptidase_M41;	65.8	3.5e-67
TRINITY_DN13671_c2_g8	I1FUC4_AMPQE/442-700	I1FUC4.1 PF01193.22;RNA_pol_L;	61.8	7.3e-33
TRINITY_DN13676_c1_g1	I1FBZ2_AMPQE/125-165	I1FBZ2.1 PF00514.21;Arm;	68.3	4.5e-06
TRINITY_DN13676_c1_g2	H2MFV1_ORYLA/276-354	H2MFV1.1 PF00595.22;PDZ;	50	1.1e-13
TRINITY_DN13676_c1_g6	I1G472_AMPQE/566-646	I1G472.1 PF00595.22;PDZ;	60.8	9.9e-20
TRINITY_DN13677_c0_g1	I1GIE6_AMPQE/46-513	I1GIE6.1 PF07690.14;MFS_1;	38.4	6.4e-76
TRINITY_DN13679_c0_g1	V8P2W5_OPHHA/13-60	V8P2W5.1 PF09360.8;zf-CDGSH;	62.8	6.8e-09
TRINITY_DN13679_c0_g2	C3Z502_BRAFL/282-346	C3Z502.1 PF01485.19;IBR;	69.2	3.4e-20
TRINITY_DN13680_c1_g5	I1GBF4_AMPQE/10-123	I1GBF4.1 PF10256.7;Erf4;	59	4.3e-20
TRINITY_DN13680_c2_g1	Q16NN6_AEDAE/432-567	Q16NN6.1 PF12796.5;Ank_2;	50	7.3e-27
TRINITY_DN13681_c0_g1	J9K8R9_ACYPI/231-295	J9K8R9.2 PF00035.24;dsrm;	44.4	1.1e-06
TRINITY_DN13682_c0_g1	V4B6A9_LOTGI/322-377	V4B6A9.1 PF00415.16;RCC1;	59	1.1e-12
TRINITY_DN13686_c0_g2	I1GIY5_AMPQE/10-335	I1GIY5.1 PF00225.21;Kinesin;	76.4	4e-90
TRINITY_DN13686_c0_g4	A7S8G2_NEMVE/64-293	A7S8G2.1 PF01269.15;Fibrillarin;	86	8.1e-70
TRINITY_DN13686_c0_g6	B3S5V8_TRIAD/76-308	B3S5V8.1 PF01269.15;Fibrillarin;	81.8	1.1e-36
TRINITY_DN13687_c0_g1	I1FRP1_AMPQE/324-486	I1FRP1.1 PF00078.25;RVT_1;	51.9	1.2e-44
TRINITY_DN13689_c0_g1	I1EFX1_AMPQE/5-166	I1EFX1.1 PF00071.20;Ras;	59.3	1.1e-50
TRINITY_DN13689_c0_g3	I1G7K1_AMPQE/17-72	I1G7K1.1 PF00412.20;LIM;	58.9	4.2e-15
TRINITY_DN13692_c0_g3	I3M8M5_ICTTR/236-273	I3M8M5.1 PF00400.30;WD40;	68.4	2.7e-07
TRINITY_DN13692_c1_g3	W6US08_ECHGR/3-212	W6US08.1 PF00091.23;Tubulin;	90.7	5.5e-104
TRINITY_DN13692_c1_g4	A7S524_NEMVE/31-224	A7S524.1 PF03587.12;EMG1;	73.7	1.8e-78
TRINITY_DN13694_c2_g2	I1FV72_AMPQE/958-1158	I1FV72.1 PF03360.14;Glyco_transf_43;	43.1	4.2e-37
TRINITY_DN13694_c3_g1	I1G146_AMPQE/6-123	I1G146.1 PF01412.16;ArfGap;	61.3	9.7e-35
TRINITY_DN13695_c3_g3	H3AMH8_LATCH/6-412	H3AMH8.1 PF01266.22;DAO;	57.4	1.2e-86
TRINITY_DN13695_c3_g4	H2LFH7_ORYLA/383-450	H2LFH7.1 PF00226.29;DnaJ;	66.2	1.3e-17
TRINITY_DN13695_c3_g6	T1JGP4_STRMM/121-186	T1JGP4.1 PF01066.19;CDP-OH_P_transf;	65.2	6.7e-15
TRINITY_DN13695_c3_g8	C3ZZU7_BRAFL/103-314	C3ZZU7.1 PF01266.22;DAO;	62.5	2.4e-44
TRINITY_DN13697_c3_g1	I1G745_AMPQE/91-208	I1G745.1 PF00615.17;RGS;	48.3	2e-20
TRINITY_DN13697_c3_g5	I1G7B4_AMPQE/139-377	I1G7B4.1 PF07528.12;DZF;	49.6	5.2e-62
TRINITY_DN13697_c3_g9	I1FU28_AMPQE/88-193	I1FU28.1 PF00168.28;C2;	45	2.9e-14
TRINITY_DN13700_c0_g2	A7SNI7_NEMVE/312-502	A7SNI7.1 PF13087.4;AAA_12;	35	3.8e-24
TRINITY_DN13701_c3_g5	W4Z6Q2_STRPU/116-246	W4Z6Q2.1 PF17207.1;MCM_OB;	78.6	4.8e-57
TRINITY_DN13702_c0_g1	I1G4W7_AMPQE/43-364	I1G4W7.1 PF01301.17;Glyco_hydro_35;	66	1.9e-124
TRINITY_DN13703_c0_g1	I1G6M7_AMPQE/57-252	I1G6M7.1 PF00149.26;Metallophos;	92.9	3e-112
TRINITY_DN13705_c0_g1	A7SHF5_NEMVE/92-191	A7SHF5.1 PF14769.4;CLAMP;	39.4	6.5e-13
TRINITY_DN13705_c1_g2	H2KNK8_CLOSI/141-343	H2KNK8.1 PF00596.19;Aldolase_II;	38.9	2.3e-34
TRINITY_DN13709_c3_g4	A7RHY6_NEMVE/729-1115	A7RHY6.1 PF05029.11;TIMELESS_C;	38.1	3.2e-25
TRINITY_DN13709_c3_g7	I1FIZ1_AMPQE/35-202	I1FIZ1.1 PF13621.4;Cupin_8;	51.9	2.2e-37
TRINITY_DN13710_c4_g3	A7RH38_NEMVE/23-306	A7RH38.1 PF00303.17;Thymidylat_synt;	78.8	1.9e-132
TRINITY_DN13710_c4_g4	I1F9S3_AMPQE/472-733	I1F9S3.1 PF01167.16;Tub;	48.9	9.1e-50
TRINITY_DN13711_c1_g1	H2ZTQ0_LATCH/546-623	H2ZTQ0.1 PF05699.12;Dimer_Tnp_hAT;	57.7	4.2e-16
TRINITY_DN13713_c2_g2	I1FN48_AMPQE/219-272	I1FN48.1 PF00097.23;zf-C3HC4;	72.2	1.7e-16
TRINITY_DN13716_c2_g1	S8A7Z2_DACHA/354-433	S8A7Z2.1 PF00789.18;UBX;	62	4.8e-19
TRINITY_DN13716_c2_g2	I1FT55_AMPQE/1-70	I1FT55.1 PF00589.20;Phage_integrase;	69	3e-07
TRINITY_DN13716_c2_g3	F2UDN1_SALR5/61-178	F2UDN1.1 PF02759.17;RUN;	47.9	4.8e-22
TRINITY_DN13722_c0_g10	W4XSF2_STRPU/412-614	W4XSF2.1 PF13901.4;zf-RING_9;	43.8	7.7e-43
TRINITY_DN13722_c0_g8	K2ALX7_9BACT/1-89	K2ALX7.1 PF00081.20;Sod_Fe_N;	77.5	1.5e-10
TRINITY_DN13723_c0_g1	M4AMR0_XIPMA/13-91	M4AMR0.1 PF00240.21;ubiquitin;	46.1	1.5e-06
TRINITY_DN13723_c0_g3	V5WCE8_9SPIO/7-127	V5WCE8.1 PF01597.17;GCV_H;	52.5	1.9e-33
TRINITY_DN13724_c3_g3	I1FZ18_AMPQE/32-210	I1FZ18.1 PF05241.10;EBP;	32.6	4.9e-26
TRINITY_DN13728_c0_g1	A0A0D2WJ91_CAPO3/8-125	A0A0D2WJ91.1 PF00787.22;PX;	50	7e-19
TRINITY_DN13728_c0_g4	I1GBW9_AMPQE/71-201	I1GBW9.1 PF06979.10;TMEM70;	49.2	4.5e-26
TRINITY_DN13729_c1_g2	I1G2J6_AMPQE/207-353	I1G2J6.1 PF00864.17;P2X_receptor;	56.2	8.2e-39
TRINITY_DN13730_c0_g1	H2YPF9_CIOSA/146-194	H2YPF9.1 PF14604.4;SH3_9;	44.9	2.9e-06
TRINITY_DN13731_c2_g1	I1G093_AMPQE/935-1149	I1G093.1 PF00069.23;Pkinase;	46.3	2.3e-49
TRINITY_DN13731_c3_g1	V3YVS7_LOTGI/11-172	V3YVS7.1 PF00071.20;Ras;	73.8	2e-54
TRINITY_DN13737_c0_g1	K1Q4U7_CRAGI/1084-1296	K1Q4U7.1 PF01602.18;Adaptin_N;	50	3.6e-06
TRINITY_DN13741_c0_g1	L5M608_MYODS/33-161	L5M608.1 PF00188.24;CAP;	47.4	6.7e-32
TRINITY_DN13742_c0_g2	F7BGY7_CIOIN/215-287	F7BGY7.2 PF00611.21;FCH;	43.7	3.6e-07
TRINITY_DN13743_c0_g1	G3NJ78_GASAC/9-341	G3NJ78.1 PF04921.12;XAP5;	51.5	3.9e-89
TRINITY_DN13746_c3_g2	T1EM67_HELRO/11-172	T1EM67.1 PF00071.20;Ras;	61.2	1.9e-53
TRINITY_DN13747_c0_g4	I1G2V7_AMPQE/8-168	I1G2V7.1 PF07177.10;Neuralized;	73.9	1.2e-69
TRINITY_DN13748_c0_g1	I1F2V5_AMPQE/492-732	I1F2V5.1 PF00069.23;Pkinase;	64.3	1.1e-20
TRINITY_DN13748_c0_g3	I1FZA6_AMPQE/100-400	I1FZA6.1 PF00676.18;E1_dh;	64.6	6.7e-111
TRINITY_DN1374_c0_g1	A0A0P7W1M4_9TELE/1-78	A0A0P7W1M4.1 PF01576.17;Myosin_tail_1;	74.1	4.7e-13
TRINITY_DN13750_c0_g1	I1FZW0_AMPQE/34-126	I1FZW0.1 PF02174.15;IRS;	39.3	3.9e-08
TRINITY_DN13750_c1_g1	I1FX10_AMPQE/137-470	I1FX10.1 PF03062.17;MBOAT;	40.4	2.7e-71
TRINITY_DN13750_c1_g4	I1F1G1_AMPQE/476-633	I1F1G1.1 PF07035.10;Mic1;	77.4	4e-62
TRINITY_DN13759_c0_g1	B3RJ24_TRIAD/140-352	B3RJ24.1 PF03417.14;AAT;	41.3	5.4e-39
TRINITY_DN13761_c0_g2	F6T7T1_XENTR/456-890	F6T7T1.1 PF13086.4;AAA_11;	48	3.6e-13
TRINITY_DN13762_c0_g1	I1FUA2_AMPQE/71-252	I1FUA2.1 PF00621.18;RhoGEF;	42.9	1e-32
TRINITY_DN13762_c0_g2	R4FL32_RHOPR/12-80	R4FL32.1 PF01423.20;LSM;	78.3	5e-24
TRINITY_DN13764_c0_g2	K9UCD6_9CHRO/15-154	K9UCD6.1 PF08719.9;DUF1768;	57.3	7.4e-34
TRINITY_DN13767_c1_g2	D0D5Y9_9RHOB/28-253	D0D5Y9.1 PF02332.16;Phenol_Hydrox;	86	1.4e-14
TRINITY_DN13767_c1_g3	D0D5Y9_9RHOB/28-253	D0D5Y9.1 PF02332.16;Phenol_Hydrox;	97.2	1.4e-120
TRINITY_DN13768_c2_g10	I1G7R8_AMPQE/204-287	I1G7R8.1 PF00352.19;TBP;	94	1.1e-37
TRINITY_DN13771_c5_g1	D6WIQ6_TRICA/665-704	D6WIQ6.1 PF07645.13;EGF_CA;	57.5	3.7e-06
TRINITY_DN13773_c1_g5	E7EZE3_DANRE/466-563	E7EZE3.2 PF13675.4;PilJ;	33	3.8e-07
TRINITY_DN13776_c4_g2	I1G0Q3_AMPQE/128-501	I1G0Q3.1 PF07992.12;Pyr_redox_2;	56.1	3e-109
TRINITY_DN13777_c0_g1	I1G590_AMPQE/206-291	I1G590.1 PF12796.5;Ank_2;	42.2	4.4e-11
TRINITY_DN13780_c0_g1	I1GIC9_AMPQE/29-207	I1GIC9.1 PF00753.25;Lactamase_B;	70.4	7.6e-74
TRINITY_DN13781_c0_g1	I1FMS9_AMPQE/6-94	I1FMS9.1 PF12733.5;Cadherin-like;	51.7	1.4e-18
TRINITY_DN13782_c1_g1	I1FCJ0_AMPQE/1-80	I1FCJ0.1 PF12796.5;Ank_2;	39.8	4.7e-11
TRINITY_DN13783_c0_g1	I1FVA7_AMPQE/22-357	I1FVA7.1 PF04143.12;Sulf_transp;	39.1	6e-63
TRINITY_DN13784_c0_g1	I1FUE0_AMPQE/58-253	I1FUE0.1 PF02146.15;SIR2;	69.7	1.4e-50
TRINITY_DN13785_c0_g1	V3ZJ30_LOTGI/5-66	V3ZJ30.1 PF04968.10;CHORD;	75.8	2.4e-24
TRINITY_DN13786_c0_g3	I1GIK3_AMPQE/316-365	I1GIK3.1 PF14604.4;SH3_9;	46	7e-06
TRINITY_DN13787_c0_g1	I1GFT8_AMPQE/233-533	I1GFT8.1 PF00749.19;tRNA-synt_1c;	81.7	1.7e-154
TRINITY_DN13788_c0_g1	K1QVD7_CRAGI/190-745	K1QVD7.1 PF02932.14;Neur_chan_memb;	42.4	1.2e-12
TRINITY_DN13788_c0_g3	G4VT56_SCHMA/28-133	G4VT56.1 PF13499.4;EF-hand_7;	44.1	7.9e-16
TRINITY_DN13789_c0_g2	I1G8D9_AMPQE/10-267	I1G8D9.1 PF09412.8;XendoU;	64	3.1e-91
TRINITY_DN13792_c0_g1	I1GC33_AMPQE/2-332	I1GC33.1 PF08569.9;Mo25;	69.3	2.6e-127
TRINITY_DN13794_c1_g1	B0X187_CULQU/50-343	B0X187.1 PF00850.17;Hist_deacetyl;	42.4	2.4e-14
TRINITY_DN13795_c0_g1	I1FFN3_AMPQE/65-295	I1FFN3.1 PF00487.22;FA_desaturase;	78.8	1.2e-106
TRINITY_DN13795_c0_g2	I1GBJ3_AMPQE/66-171	I1GBJ3.1 PF01521.18;Fe-S_biosyn;	61	2.1e-33
TRINITY_DN13798_c2_g2	C3YIH5_BRAFL/29-313	C3YIH5.1 PF01207.15;Dus;	50.3	8.4e-90
TRINITY_DN13800_c0_g1	A0A0D2VKA4_CAPO3/21-246	A0A0D2VKA4.1 PF00108.21;Thiolase_N;	76	1.7e-78
TRINITY_DN13800_c0_g11	F0ZAK3_DICPU/104-358	F0ZAK3.1 PF00149.26;Metallophos;	35.8	2.1e-40
TRINITY_DN13800_c0_g3	B3RYU8_TRIAD/341-547	B3RYU8.1 PF04042.14;DNA_pol_E_B;	40.8	5.9e-41
TRINITY_DN13800_c0_g4	I1G3V9_AMPQE/45-208	I1G3V9.1 PF00071.20;Ras;	48.3	1.8e-49
TRINITY_DN13800_c0_g6	W7TUK8_9STRA/110-184	W7TUK8.1 PF01929.15;Ribosomal_L14e;	49.3	1e-13
TRINITY_DN13800_c0_g8	H3B4S5_LATCH/54-315	H3B4S5.1 PF05219.10;DREV;	45.1	5.5e-53
TRINITY_DN13802_c2_g7	I1GAR9_AMPQE/21-196	I1GAR9.1 PF00270.27;DEAD;	44.8	1.3e-38
TRINITY_DN13805_c0_g1	K1RGE4_CRAGI/1010-1265	K1RGE4.1 PF14678.4;FANCI_S4;	67.8	1.1e-11
TRINITY_DN13808_c3_g2	A0A0P8XJC3_DROAN/109-299	A0A0P8XJC3.1 PF00270.27;DEAD;	58.2	1.7e-62
TRINITY_DN13808_c4_g2	I1ELZ6_AMPQE/4-66	I1ELZ6.1 PF04145.13;Ctr;	53.1	8.6e-07
TRINITY_DN13811_c0_g1	I1FTP0_AMPQE/419-580	I1FTP0.1 PF01369.18;Sec7;	59	8.4e-21
TRINITY_DN13811_c0_g4	C3YDL0_BRAFL/284-323	C3YDL0.1 PF13923.4;zf-C3HC4_2;	70	9.7e-12
TRINITY_DN13811_c0_g5	G4V7R7_SCHMA/467-705	G4V7R7.1 PF00656.20;Peptidase_C14;	26.1	5.6e-13
TRINITY_DN13811_c0_g6	W4XPL6_STRPU/4-57	W4XPL6.1 PF07491.9;PPI_Ypi1;	59.6	7.2e-12
TRINITY_DN13812_c0_g2	I1FRL1_AMPQE/28-326	I1FRL1.1 PF00481.19;PP2C;	55.2	1.3e-11
TRINITY_DN13814_c1_g3	I1FIG7_AMPQE/811-1073	I1FIG7.1 PF10350.7;DUF2428;	44.3	8.4e-54
TRINITY_DN13818_c0_g1	A1ZK49_9BACT/6-145	A1ZK49.1 PF08719.9;DUF1768;	53.9	3.5e-38
TRINITY_DN13819_c5_g2	I3JC77_ORENI/73-206	I3JC77.1 PF00578.19;AhpC-TSA;	77.6	2.8e-56
TRINITY_DN13822_c0_g1	I1GB21_AMPQE/593-975	I1GB21.1 PF07714.15;Pkinase_Tyr;	42.7	4.9e-73
TRINITY_DN13828_c1_g1	I1E9Q2_AMPQE/1-233	I1E9Q2.1 PF12269.6;zf-CpG_bind_C;	61.6	7.6e-44
TRINITY_DN13828_c1_g2	I1FIZ8_AMPQE/217-575	I1FIZ8.1 PF13598.4;DUF4139;	48.9	2.4e-44
TRINITY_DN13828_c1_g3	I1GFY6_AMPQE/51-338	I1GFY6.1 PF06472.13;ABC_membrane_2;	68.1	3.8e-108
TRINITY_DN13828_c1_g4	W5X059_BDEBC/17-272	W5X059.1 PF01040.16;UbiA;	39.4	2.7e-25
TRINITY_DN13832_c0_g1	A9G0Q5_SORC5/53-346	A9G0Q5.1 PF14388.4;DUF4419;	55.5	5e-33
TRINITY_DN13832_c0_g2	A9G0Q5_SORC5/53-346	A9G0Q5.1 PF14388.4;DUF4419;	53.4	4.1e-82
TRINITY_DN13833_c1_g1	A0A067M4E2_9HOMO/322-406	A0A067M4E2.1 PF12894.5;ANAPC4_WD40;	73.2	2.6e-11
TRINITY_DN13834_c4_g2	I1GE90_AMPQE/552-608	I1GE90.1 PF07653.15;SH3_2;	54.4	8.9e-10
TRINITY_DN13834_c4_g4	A7RX99_NEMVE/226-287	A7RX99.1 PF00226.29;DnaJ;	70	2.1e-15
TRINITY_DN13835_c2_g1	G5E6T9_LOXAF/3-292	G5E6T9.1 PF03194.13;LUC7;	30.8	7.5e-30
TRINITY_DN13836_c2_g2	I1GCS1_AMPQE/100-169	I1GCS1.1 PF02186.13;TFIIE_beta;	44.9	3.3e-10
TRINITY_DN13836_c3_g1	I1FE42_AMPQE/235-404	I1FE42.1 PF00566.16;RabGAP-TBC;	69.2	2e-29
TRINITY_DN13837_c0_g1	I1FP44_AMPQE/798-1104	I1FP44.1 PF12770.5;CHAT;	36.5	2.1e-46
TRINITY_DN13839_c2_g2	I1FZX1_AMPQE/61-298	I1FZX1.1 PF07690.14;MFS_1;	45	6e-55
TRINITY_DN13840_c0_g2	A7SHG6_NEMVE/2-217	A7SHG6.1 PF05250.9;UPF0193;	45.5	2.9e-19
TRINITY_DN13841_c0_g1	I1G4Z6_AMPQE/150-393	I1G4Z6.1 PF00082.20;Peptidase_S8;	47.2	1.5e-17
TRINITY_DN13843_c1_g12	I1GH53_AMPQE/407-548	I1GH53.1 PF11875.6;DUF3395;	60.6	4.5e-42
TRINITY_DN13843_c1_g3	I1FU33_AMPQE/385-514	I1FU33.1 PF01380.20;SIS;	91.5	2.6e-59
TRINITY_DN13846_c4_g3	A0A0D2UKQ3_CAPO3/490-594	A0A0D2UKQ3.1 PF04003.10;Utp12;	45.2	1e-20
TRINITY_DN13846_c4_g9	I1FVI6_AMPQE/271-511	I1FVI6.1 PF01151.16;ELO;	48.9	3.9e-61
TRINITY_DN13847_c0_g1	A7SUI7_NEMVE/373-479	A7SUI7.1 PF02204.16;VPS9;	38.2	2.5e-13
TRINITY_DN13847_c0_g3	H3ATR1_LATCH/5-174	H3ATR1.1 PF01210.21;NAD_Gly3P_dh_N;	59.8	5.3e-53
TRINITY_DN13848_c1_g4	B3S0Y6_TRIAD/5-102	B3S0Y6.1 PF06294.9;CH_2;	53.8	5.2e-22
TRINITY_DN13848_c1_g5	I1FYD8_AMPQE/534-840	I1FYD8.1 PF01180.19;DHO_dh;	81.7	7.9e-101
TRINITY_DN13848_c1_g8	C3YCJ1_BRAFL/192-501	C3YCJ1.1 PF07992.12;Pyr_redox_2;	74.1	7.2e-132
TRINITY_DN13852_c0_g1	I1FMP8_AMPQE/565-859	I1FMP8.1 PF09311.9;Rab5-bind;	34	6.1e-13
TRINITY_DN13852_c1_g2	I1G1I1_AMPQE/2-329	I1G1I1.1 PF13738.4;Pyr_redox_3;	54.6	3.9e-97
TRINITY_DN13854_c2_g3	H2M2U2_ORYLA/9-109	H2M2U2.1 PF03650.11;MPC;	70.4	7.8e-32
TRINITY_DN13854_c2_g5	B3S9Y3_TRIAD/1-429	B3S9Y3.1 PF10300.7;DUF3808;	39.4	1.7e-17
TRINITY_DN13857_c0_g1	V3ZDM0_LOTGI/70-134	V3ZDM0.1 PF13499.4;EF-hand_7;	61.5	1.4e-17
TRINITY_DN13857_c0_g2	V3ZDM0_LOTGI/70-134	V3ZDM0.1 PF13499.4;EF-hand_7;	58.5	7.6e-17
TRINITY_DN13859_c0_g3	I1F9Y9_AMPQE/223-371	I1F9Y9.1 PF07200.11;Mod_r;	43	2e-23
TRINITY_DN13860_c0_g5	I1GHM5_AMPQE/1025-1139	I1GHM5.1 PF00168.28;C2;	33.9	9e-11
TRINITY_DN13860_c1_g3	I1G9L7_AMPQE/37-221	I1G9L7.1 PF07847.10;PCO_ADO;	47.4	7.7e-48
TRINITY_DN13860_c1_g4	I1GEZ9_AMPQE/6-226	I1GEZ9.1 PF04157.14;EAP30;	71.2	6.1e-77
TRINITY_DN13861_c2_g4	I1FTI4_AMPQE/15-62	I1FTI4.1 PF00018.26;SH3_1;	84.8	3.4e-17
TRINITY_DN13861_c3_g1	H2SEE9_TAKRU/21-277	H2SEE9.1 PF00069.23;Pkinase;	71.4	3.2e-101
TRINITY_DN13863_c0_g1	M3W8W2_FELCA/16-260	M3W8W2.1 PF07714.15;Pkinase_Tyr;	38.6	3.8e-43
TRINITY_DN13864_c0_g2	C3YH61_BRAFL/34-473	C3YH61.1 PF00450.20;Peptidase_S10;	53.4	2.3e-130
TRINITY_DN13865_c0_g1	I1GD65_AMPQE/170-320	I1GD65.1 PF14580.4;LRR_9;	57.5	2.7e-18
TRINITY_DN13867_c1_g1	I1G4V0_AMPQE/167-292	I1G4V0.1 PF01545.19;Cation_efflux;	76.9	4.3e-41
TRINITY_DN13875_c0_g2	B0XE73_CULQU/84-148	B0XE73.1 PF13499.4;EF-hand_7;	50	1.8e-07
TRINITY_DN13877_c0_g1	I1F9Y1_AMPQE/40-206	I1F9Y1.1 PF03637.15;Mob1_phocein;	80.7	2.4e-73
TRINITY_DN13877_c1_g6	V3ZXQ6_LOTGI/41-224	V3ZXQ6.1 PF10274.7;ParcG;	91	1.5e-79
TRINITY_DN13878_c1_g1	I1FZF4_AMPQE/44-281	I1FZF4.1 PF00112.21;Peptidase_C1;	58	7.2e-78
TRINITY_DN13878_c1_g2	D6W6C6_TRICA/71-345	D6W6C6.1 PF00122.18;E1-E2_ATPase;	68.1	2.7e-95
TRINITY_DN13879_c2_g1	I1GJ95_AMPQE/14-236	I1GJ95.1 PF00335.18;Tetraspannin;	40.7	8e-07
TRINITY_DN13879_c2_g6	A7S8Y7_NEMVE/283-762	A7S8Y7.1 PF03200.14;Glyco_hydro_63;	61.7	7.5e-179
TRINITY_DN13881_c1_g1	I1E641_AMPQE/154-314	I1E641.1 PF00078.25;RVT_1;	71.3	7.6e-66
TRINITY_DN13883_c3_g12	A0A015LGW7_9GLOM/51-94	A0A015LGW7.1 PF00468.15;Ribosomal_L34;	68.2	2.8e-09
TRINITY_DN13883_c3_g3	I1GA12_AMPQE/575-718	I1GA12.1 PF01694.20;Rhomboid;	50.7	3.1e-31
TRINITY_DN13884_c4_g4	A0A0E9NMM6_9ASCO/23-173	A0A0E9NMM6.1 PF04051.14;TRAPP;	57.1	1.6e-08
TRINITY_DN13891_c3_g1	EIF3L_NEMVE/117-515	A7SDW5.1 PF10255.7;Paf67;	58.2	3.2e-134
TRINITY_DN13893_c2_g1	I1G6V2_AMPQE/21-126	I1G6V2.1 PF00085.18;Thioredoxin;	71.7	1.3e-40
TRINITY_DN13893_c2_g2	I1G5I2_AMPQE/365-471	I1G5I2.1 PF00085.18;Thioredoxin;	81	6e-47
TRINITY_DN13893_c2_g3	I1GDD9_AMPQE/85-648	I1GDD9.1 PF00305.17;Lipoxygenase;	47.8	1.3e-145
TRINITY_DN13893_c3_g4	I1GDD4_AMPQE/31-130	I1GDD4.1 PF14523.4;Syntaxin_2;	35.7	9.4e-08
TRINITY_DN13894_c0_g1	A0A084WUD4_ANOSI/95-154	A0A084WUD4.1 PF00137.19;ATP-synt_C;	95	1.7e-19
TRINITY_DN13896_c2_g2	I1FPP7_AMPQE/6-110	I1FPP7.1 PF00169.27;PH;	43.8	1.2e-21
TRINITY_DN13896_c2_g4	V4AT40_LOTGI/14-178	V4AT40.1 PF00071.20;Ras;	66.5	4.3e-59
TRINITY_DN13897_c0_g2	T1KHG3_TETUR/27-103	T1KHG3.1 PF01253.20;SUI1;	83.1	6.3e-32
TRINITY_DN13898_c3_g2	I1EBH5_AMPQE/2-184	I1EBH5.1 PF03770.14;IPK;	67.9	6.3e-14
TRINITY_DN13905_c3_g1	I1FN33_AMPQE/809-1053	I1FN33.1 PF00102.25;Y_phosphatase;	56.9	1.9e-26
TRINITY_DN13907_c0_g2	I1GIT0_AMPQE/12-234	I1GIT0.1 PF03803.13;Scramblase;	35.4	1.4e-30
TRINITY_DN13910_c0_g1	I1FV41_AMPQE/196-397	I1FV41.1 PF00852.17;Glyco_transf_10;	59.8	1.6e-64
TRINITY_DN13911_c0_g1	I1GER0_AMPQE/18-124	I1GER0.1 PF00169.27;PH;	67.3	1.7e-35
TRINITY_DN13911_c1_g1	I1GER1_AMPQE/100-284	I1GER1.1 PF00225.21;Kinesin;	77.1	9.3e-67
TRINITY_DN13911_c1_g3	T1I6D8_RHOPR/534-619	T1I6D8.1 PF00788.21;RA;	47.1	1.3e-09
TRINITY_DN13911_c1_g5	I1G262_AMPQE/27-181	I1G262.1 PF10504.7;DUF2452;	63.2	7.9e-49
TRINITY_DN13912_c0_g1	I1FRI7_AMPQE/5-178	I1FRI7.1 PF00071.20;Ras;	77.5	7.7e-31
TRINITY_DN13912_c1_g1	I1FRI7_AMPQE/5-178	I1FRI7.1 PF00071.20;Ras;	77	9.1e-80
TRINITY_DN13914_c0_g1	W4XM60_STRPU/18-230	W4XM60.1 PF08397.9;IMD;	24.5	7.4e-09
TRINITY_DN13916_c0_g3	A0A0D2WLJ1_CAPO3/310-782	A0A0D2WLJ1.1 PF07690.14;MFS_1;	22.1	3.8e-24
TRINITY_DN13917_c0_g1	I1GDI9_AMPQE/11-134	I1GDI9.1 PF02136.18;NTF2;	58.9	1.2e-32
TRINITY_DN13917_c0_g3	I1EBF2_AMPQE/39-187	I1EBF2.1 PF12762.5;DDE_Tnp_IS1595;	84.8	2.4e-09
TRINITY_DN13919_c0_g1	I1FF19_AMPQE/75-620	I1FF19.1 PF03137.18;OATP;	40	4.1e-120
TRINITY_DN13920_c0_g1	I1G7S3_AMPQE/45-365	I1G7S3.1 PF10186.7;Atg14;	31.4	2.6e-21
TRINITY_DN13920_c0_g2	C3Y0B8_BRAFL/31-217	C3Y0B8.1 PF00227.24;Proteasome;	61.5	3.2e-66
TRINITY_DN13921_c1_g1	G8TLH3_NIAKG/46-277	G8TLH3.1 PF11790.6;Glyco_hydro_cc;	36	5e-28
TRINITY_DN13923_c0_g7	W9WAK1_9EURO/306-565	W9WAK1.1 PF13360.4;PQQ_2;	43.2	5.4e-60
TRINITY_DN13928_c1_g4	I1EHD8_AMPQE/4-95	I1EHD8.1 PF00630.17;Filamin;	57.1	8.7e-22
TRINITY_DN13929_c0_g1	I1FR29_AMPQE/322-492	I1FR29.1 PF01734.20;Patatin;	58.2	4.5e-45
TRINITY_DN13930_c3_g6	I1GIQ5_AMPQE/58-527	I1GIQ5.1 PF02535.20;Zip;	36.4	1e-40
TRINITY_DN13930_c4_g3	T1JFI8_STRMM/267-439	T1JFI8.1 PF03166.12;MH2;	87.3	8.2e-91
TRINITY_DN13931_c3_g3	U6MQ09_9EIME/294-361	U6MQ09.1 PF00013.27;KH_1;	56.1	7.3e-13
TRINITY_DN13933_c0_g2	I1GHE0_AMPQE/17-318	I1GHE0.1 PF05462.9;Dicty_CAR;	32.8	9e-31
TRINITY_DN13936_c1_g1	I1FLI4_AMPQE/664-734	I1FLI4.1 PF12796.5;Ank_2;	70.4	8.1e-21
TRINITY_DN13936_c1_g2	A0A0D9RK24_CHLSB/769-838	A0A0D9RK24.1 PF01480.15;PWI;	71	8.3e-23
TRINITY_DN13936_c1_g3	I1G6M4_AMPQE/85-154	I1G6M4.1 PF00076.20;RRM_1;	82.9	3.9e-26
TRINITY_DN13937_c0_g3	B3RJ28_TRIAD/6-72	B3RJ28.1 PF04212.16;MIT;	70.7	3.2e-07
TRINITY_DN13937_c0_g4	A0A098VMS5_9MICR/47-174	A0A098VMS5.1 PF00004.27;AAA;	77.4	7.4e-06
TRINITY_DN13938_c0_g2	I1G0S3_AMPQE/8-130	I1G0S3.1 PF00581.18;Rhodanese;	54.8	2.9e-36
TRINITY_DN13941_c1_g3	I1FL29_AMPQE/12-284	I1FL29.1 PF08217.9;DUF1712;	61.5	2.7e-76
TRINITY_DN13941_c1_g5	I1GF28_AMPQE/94-277	I1GF28.1 PF10229.7;MMADHC;	63.6	4.3e-54
TRINITY_DN13942_c0_g3	STRAP_DICDI/58-221	Q54LT8.1 PF08662.9;eIF2A;	34.1	2.2e-20
TRINITY_DN13942_c0_g4	K1QN09_CRAGI/2-161	K1QN09.1 PF00160.19;Pro_isomerase;	68.2	4.2e-58
TRINITY_DN13944_c0_g1	I1G5S9_AMPQE/20-237	I1G5S9.1 PF00147.16;Fibrinogen_C;	45.7	2.8e-41
TRINITY_DN13945_c0_g3	A0A015KHZ9_9GLOM/47-132	A0A015KHZ9.1 PF00203.19;Ribosomal_S19;	85.2	2.2e-33
TRINITY_DN13945_c1_g2	T1IPR4_STRMM/197-502	T1IPR4.1 PF00749.19;tRNA-synt_1c;	75.2	8.9e-138
TRINITY_DN13945_c1_g3	A0A0N5DJ00_TRIMR/2-286	A0A0N5DJ00.1 PF00587.23;tRNA-synt_2b;	56.5	2.7e-96
TRINITY_DN13946_c0_g1	I1GF99_AMPQE/66-260	I1GF99.1 PF00106.23;adh_short;	58.2	3.7e-58
TRINITY_DN13947_c0_g1	B3SCU9_TRIAD/1227-1324	B3SCU9.1 PF00530.16;SRCR;	39.8	3.8e-12
TRINITY_DN13948_c2_g1	I1FDP3_AMPQE/742-929	I1FDP3.1 PF02141.19;DENN;	57.6	2.5e-35
TRINITY_DN13948_c2_g3	F6SP82_XENTR/255-419	F6SP82.1 PF08839.9;CDT1;	51.2	1.9e-39
TRINITY_DN13949_c1_g3	I1FXB5_AMPQE/198-468	I1FXB5.1 PF00346.17;Complex1_49kDa;	76.2	1.1e-119
TRINITY_DN13949_c1_g5	I1GGR2_AMPQE/7-116	I1GGR2.1 PF00307.29;CH;	39.6	7.1e-19
TRINITY_DN13949_c1_g9	NUOD_GEOBB/44-155	B5EFG0.1 PF00374.17;NiFeSe_Hases;	53.8	8.5e-22
TRINITY_DN13950_c0_g6	Q1XGA7_PHYPA/10-318	Q1XGA7.1 PF00146.19;NADHdh;	94.3	1.3e-19
TRINITY_DN13950_c0_g8	W5FA53_WHEAT/1-258	W5FA53.1 PF00115.18;COX1;	99	2.9e-48
TRINITY_DN13953_c0_g5	A0A0K8P3Z3_9BURK/3-109	A0A0K8P3Z3.1 PF00453.16;Ribosomal_L20;	88.8	1.5e-45
TRINITY_DN13953_c1_g2	C3YCB2_BRAFL/637-771	C3YCB2.1 PF08625.9;Utp13;	56.3	2.2e-36
TRINITY_DN13953_c2_g1	G1Q444_MYOLU/233-464	G1Q444.1 PF00233.17;PDEase_I;	69.7	7.3e-70
TRINITY_DN13954_c2_g1	I1FIR1_AMPQE/38-182	I1FIR1.1 PF00179.24;UQ_con;	88.1	3.9e-27
TRINITY_DN13954_c3_g2	A7RXW7_NEMVE/26-182	A7RXW7.1 PF00071.20;Ras;	77.4	3.8e-56
TRINITY_DN13955_c1_g2	B3S466_TRIAD/278-360	B3S466.1 PF00789.18;UBX;	42.7	4e-12
TRINITY_DN13957_c0_g1	B3RK52_TRIAD/1-42	B3RK52.1 PF13639.4;zf-RING_2;	52.4	3.7e-07
TRINITY_DN13962_c2_g7	I1G9I1_AMPQE/55-328	I1G9I1.1 PF00246.22;Peptidase_M14;	65.2	6e-104
TRINITY_DN13963_c0_g3	C3ZJ54_BRAFL/64-290	C3ZJ54.1 PF06159.11;DUF974;	41.5	1.1e-41
TRINITY_DN13964_c0_g1	M4A1A3_XIPMA/61-423	M4A1A3.1 PF07287.9;DUF1446;	57.9	1e-118
TRINITY_DN13965_c1_g10	I1FR43_AMPQE/81-181	I1FR43.1 PF00077.18;RVP;	45.6	5.7e-10
TRINITY_DN13966_c0_g2	I1G081_AMPQE/6-509	I1G081.1 PF05833.9;FbpA;	58.7	3.3e-134
TRINITY_DN13969_c0_g1	W5K037_ASTMX/606-920	W5K037.1 PF16653.3;Sacchrp_dh_C;	50.2	9.9e-87
TRINITY_DN13969_c0_g2	K1Q7P7_CRAGI/1-101	K1Q7P7.1 PF14892.4;DUF4490;	56	4.4e-25
TRINITY_DN13969_c1_g2	I1GG38_AMPQE/110-179	I1GG38.1 PF07258.12;COMM_domain;	80	1.6e-24
TRINITY_DN1396_c0_g1	K1PEY6_CRAGI/12-540	K1PEY6.1 PF07888.9;CALCOCO1;	42.2	1.5e-18
TRINITY_DN13971_c3_g3	V8P6X5_OPHHA/4-94	V8P6X5.1 PF02290.13;SRP14;	63.6	1.8e-22
TRINITY_DN13971_c4_g11	A0A0D2WRD8_CAPO3/108-323	A0A0D2WRD8.1 PF00112.21;Peptidase_C1;	73.1	1.3e-90
TRINITY_DN13971_c4_g3	I1GCC4_AMPQE/80-366	I1GCC4.1 PF00069.23;Pkinase;	63.7	3.1e-109
TRINITY_DN13971_c4_g5	I1G166_AMPQE/65-133	I1G166.1 PF00550.23;PP-binding;	76.5	8.3e-23
TRINITY_DN13971_c4_g7	I1G165_AMPQE/218-296	I1G165.1 PF04969.14;CS;	66.1	4.6e-14
TRINITY_DN13973_c4_g2	I1GJE1_AMPQE/216-800	I1GJE1.1 PF04097.12;Nic96;	53.7	1.3e-181
TRINITY_DN13973_c6_g1	I1F9D5_AMPQE/254-356	I1F9D5.1 PF02174.15;IRS;	58.3	7.5e-29
TRINITY_DN13975_c0_g1	I1EYR1_AMPQE/12-217	I1EYR1.1 PF04721.15;PAW;	44.2	1.5e-27
TRINITY_DN13977_c0_g2	I1EMP8_AMPQE/1-51	I1EMP8.1 PF00441.22;Acyl-CoA_dh_1;	90.2	4.9e-18
TRINITY_DN13978_c2_g2	I1FIS3_AMPQE/27-266	I1FIS3.1 PF03114.16;BAR;	48.6	5.3e-11
TRINITY_DN13978_c2_g3	F6TG15_XENTR/63-237	F6TG15.1 PF06026.12;Rib_5-P_isom_A;	64.4	1.6e-60
TRINITY_DN13979_c1_g6	W4Z9D5_STRPU/520-630	W4Z9D5.1 PF00665.24;rve;	72.1	2.6e-43
TRINITY_DN13980_c0_g1	I1F7Z4_AMPQE/95-249	I1F7Z4.1 PF05729.10;NACHT;	33.3	2.5e-13
TRINITY_DN13982_c0_g1	T1EE28_HELRO/106-232	T1EE28.1 PF00134.21;Cyclin_N;	66.1	1.6e-40
TRINITY_DN13983_c2_g1	I1FUP9_AMPQE/29-145	I1FUP9.1 PF00472.18;RF-1;	36.8	1.5e-13
TRINITY_DN13983_c3_g2	I1GF89_AMPQE/20-390	I1GF89.1 PF10498.7;IFT57;	49.1	3.2e-79
TRINITY_DN13983_c3_g5	E1Z763_CHLVA/180-418	E1Z763.1 PF03372.21;Exo_endo_phos;	27.4	6.3e-12
TRINITY_DN13984_c0_g1	I1FZT2_AMPQE/12-82	I1FZT2.1 PF00076.20;RRM_1;	60.6	4.3e-18
TRINITY_DN13986_c0_g1	A7RQZ1_NEMVE/26-147	A7RQZ1.1 PF04471.10;Mrr_cat;	37	9.3e-10
TRINITY_DN13986_c0_g2	A0A0G0THF5_9BACT/8-128	A0A0G0THF5.1 PF01641.16;SelR;	55.6	7.3e-28
TRINITY_DN13986_c0_g6	I1FAR7_AMPQE/330-655	I1FAR7.1 PF00493.21;MCM;	80.8	1.4e-150
TRINITY_DN13987_c2_g1	A7S8S8_NEMVE/97-456	A7S8S8.1 PF09766.7;FimP;	42.3	6.9e-64
TRINITY_DN13987_c2_g16	W4XPR5_STRPU/151-260	W4XPR5.1 PF00411.17;Ribosomal_S11;	68.6	1.6e-13
TRINITY_DN13987_c2_g3	I1GGS6_AMPQE/47-341	I1GGS6.1 PF00291.23;PALP;	65.8	8.2e-104
TRINITY_DN13987_c2_g9	A0A0F3GHV8_9BACT/19-128	A0A0F3GHV8.1 PF00411.17;Ribosomal_S11;	56.8	9.1e-07
TRINITY_DN13990_c1_g1	A9YRX3_AMPQE/45-343	A9YRX3.1 PF00110.17;wnt;	46.7	6e-34
TRINITY_DN13990_c3_g3	I1GB39_AMPQE/3-137	I1GB39.1 PF01553.19;Acyltransferase;	70.1	3.1e-47
TRINITY_DN13992_c0_g3	M3WSB2_FELCA/101-296	M3WSB2.1 PF00448.20;SRP54;	89.2	8.6e-96
TRINITY_DN13994_c4_g1	N6TU53_DENPD/2-117	N6TU53.1 PF03656.11;Pam16;	50.5	5.7e-19
TRINITY_DN13994_c4_g2	C3Y9P4_BRAFL/96-391	C3Y9P4.1 PF00082.20;Peptidase_S8;	37.9	1e-44
TRINITY_DN13994_c6_g3	T1IKD2_STRMM/4312-4443	T1IKD2.1 PF00054.21;Laminin_G_1;	38.6	1.1e-16
TRINITY_DN13994_c6_g4	PGBM_MOUSE/3551-3681	Q05793.1 PF00054.21;Laminin_G_1;	37.5	4.3e-13
TRINITY_DN13996_c1_g4	I1FLA3_AMPQE/632-716	I1FLA3.1 PF00630.17;Filamin;	62.2	1.2e-21
TRINITY_DN13997_c0_g1	W5K7S1_ASTMX/2-146	W5K7S1.1 PF03031.16;NIF;	85.1	2.2e-51
TRINITY_DN13999_c1_g1	B3RLA0_TRIAD/115-163	B3RLA0.1 PF00628.27;PHD;	67.4	1.5e-13
TRINITY_DN13999_c1_g2	A7RXF0_NEMVE/75-165	A7RXF0.1 PF08236.9;SRI;	57.5	1.3e-18
TRINITY_DN13999_c2_g1	A0A067QJH6_ZOONE/112-221	A0A067QJH6.1 PF00307.29;CH;	52.7	9.1e-24
TRINITY_DN13999_c2_g4	I1FMF0_AMPQE/111-273	I1FMF0.1 PF04727.11;ELMO_CED12;	46.3	2.2e-39
TRINITY_DN14000_c0_g1	G8ARJ6_AZOBR/12-259	G8ARJ6.1 PF13561.4;adh_short_C2;	55.5	3.5e-68
TRINITY_DN14003_c0_g1	I1FAL5_AMPQE/335-522	I1FAL5.1 PF00617.17;RasGEF;	66.7	2.4e-38
TRINITY_DN14003_c0_g10	I1FAL5_AMPQE/335-522	I1FAL5.1 PF00617.17;RasGEF;	49.3	2.2e-10
TRINITY_DN14003_c0_g5	I1FMX8_AMPQE/154-250	I1FMX8.1 PF13864.4;Enkurin;	56.6	4.8e-22
TRINITY_DN14008_c0_g3	G1NWE5_MYOLU/47-207	G1NWE5.1 PF01554.16;MatE;	48.4	2.2e-28
TRINITY_DN14008_c0_g5	C3XU71_BRAFL/8-367	C3XU71.1 PF01266.22;DAO;	57.5	1.5e-122
TRINITY_DN14008_c0_g6	E0VJD2_PEDHC/98-220	E0VJD2.1 PF00293.26;NUDIX;	47.9	5e-26
TRINITY_DN14008_c0_g7	I1FSA5_AMPQE/498-557	I1FSA5.1 PF13432.4;TPR_16;	55	5.6e-10
TRINITY_DN14009_c2_g1	I1FJG3_AMPQE/87-132	I1FJG3.1 PF12937.5;F-box-like;	77.3	2.8e-11
TRINITY_DN14009_c2_g2	I1FVH4_AMPQE/220-534	I1FVH4.1 PF00883.19;Peptidase_M17;	66.2	4.9e-117
TRINITY_DN14010_c1_g1	I1F957_AMPQE/1328-1532	I1F957.1 PF13087.4;AAA_12;	43.5	3.2e-39
TRINITY_DN14010_c2_g1	I3K6A3_ORENI/7-278	I3K6A3.1 PF03850.12;Tfb4;	46.9	2.7e-63
TRINITY_DN14010_c2_g4	A7SM03_NEMVE/42-346	A7SM03.1 PF00454.25;PI3_PI4_kinase;	51.4	6.6e-98
TRINITY_DN14012_c1_g2	V4CKN6_LOTGI/24-239	V4CKN6.1 PF12348.6;CLASP_N;	47.5	7e-45
TRINITY_DN14012_c1_g4	G3SUB7_LOXAF/30-158	G3SUB7.1 PF00188.24;CAP;	44	1.7e-27
TRINITY_DN14012_c1_g7	I1G088_AMPQE/65-266	I1G088.1 PF12348.6;CLASP_N;	40.6	9.7e-28
TRINITY_DN14013_c1_g1	W4YF99_STRPU/221-334	W4YF99.1 PF01661.19;Macro;	47	3.9e-23
TRINITY_DN14014_c1_g1	I1G4L1_AMPQE/37-245	I1G4L1.1 PF01284.21;MARVEL;	34.8	1.4e-07
TRINITY_DN14016_c2_g3	B4MUL8_DROWI/14-112	B4MUL8.1 PF00153.25;Mito_carr;	63.6	1.1e-33
TRINITY_DN14017_c1_g3	B4I751_DROSE/44-615	B4I751.1 PF12569.6;NARP1;	46.6	6.1e-132
TRINITY_DN14017_c1_g4	L8H880_ACACA/463-645	L8H880.1 PF01183.18;Glyco_hydro_25;	53.8	7.8e-51
TRINITY_DN14019_c4_g1	I1F7J3_AMPQE/33-140	I1F7J3.1 PF00651.29;BTB;	81.5	1.5e-39
TRINITY_DN14020_c0_g2	A7SAK1_NEMVE/16-398	A7SAK1.1 PF03148.12;Tektin;	44	7.1e-76
TRINITY_DN14020_c1_g2	W4Y515_STRPU/178-446	W4Y515.1 PF01457.14;Peptidase_M8;	36.9	7.1e-30
TRINITY_DN14020_c1_g4	Q501K6_XENTR/40-491	Q501K6.1 PF00067.20;p450;	30	5.1e-57
TRINITY_DN14023_c3_g1	I1FNB2_AMPQE/449-575	I1FNB2.1 PF00754.23;F5_F8_type_C;	74.6	9.7e-54
TRINITY_DN14028_c0_g1	V3ZYV1_LOTGI/193-350	V3ZYV1.1 PF00179.24;UQ_con;	61.1	2.2e-51
TRINITY_DN14028_c0_g2	A7RRF4_NEMVE/12-140	A7RRF4.1 PF02936.12;COX4;	25	6.6e-06
TRINITY_DN14028_c1_g1	K1R849_CRAGI/601-941	K1R849.1 PF00225.21;Kinesin;	61.3	5.8e-114
TRINITY_DN14028_c1_g6	B1MI91_MYCA9/6-251	B1MI91.1 PF00795.20;CN_hydrolase;	35.3	3.9e-08
TRINITY_DN1402_c0_g1	C3Z4N6_BRAFL/4-150	C3Z4N6.1 PF00483.21;NTP_transferase;	51.1	1.8e-13
TRINITY_DN14030_c4_g1	I1G2P5_AMPQE/6-66	I1G2P5.1 PF08154.10;NLE;	59	1.2e-13
TRINITY_DN14030_c6_g3	A0A022S2K4_ERYGU/284-359	A0A022S2K4.1 PF00400.30;WD40;	62.2	5.1e-20
TRINITY_DN14031_c0_g1	A7SWE1_NEMVE/443-646	A7SWE1.1 PF16095.3;COR;	47.4	5.4e-46
TRINITY_DN14031_c0_g3	I1FS20_AMPQE/1322-1647	I1FS20.1 PF00069.23;Pkinase;	54.5	3.6e-94
TRINITY_DN14032_c0_g1	I1GFM9_AMPQE/33-162	I1GFM9.1 PF12619.6;MCM2_N;	72.2	1.1e-21
TRINITY_DN14032_c0_g5	B3RUX5_TRIAD/190-295	B3RUX5.1 PF14551.4;MCM_N;	74.5	2.2e-38
TRINITY_DN14034_c0_g3	B3S0H0_TRIAD/69-251	B3S0H0.1 PF00535.24;Glycos_transf_2;	60.2	6.4e-55
TRINITY_DN14036_c3_g1	I1FRK7_AMPQE/1-453	I1FRK7.1 PF16969.3;SRP68;	54.5	5.6e-137
TRINITY_DN14040_c0_g1	A7SX44_NEMVE/1-413	A7SX44.1 PF00450.20;Peptidase_S10;	67.6	1.1e-68
TRINITY_DN14045_c0_g1	A9T8D8_PHYPA/88-233	A9T8D8.1 PF01565.21;FAD_binding_4;	47.3	2.6e-31
TRINITY_DN14045_c1_g11	A9T8D8_PHYPA/88-233	A9T8D8.1 PF01565.21;FAD_binding_4;	51.2	2e-19
TRINITY_DN14045_c1_g4	A0A067M8N5_9HOMO/123-291	A0A067M8N5.1 PF01565.21;FAD_binding_4;	60.8	2.7e-16
TRINITY_DN14046_c4_g5	W5KDC8_ASTMX/1554-1702	W5KDC8.1 PF05843.12;Suf;	53.3	1.3e-37
TRINITY_DN14048_c0_g1	A7RHN2_NEMVE/84-370	A7RHN2.1 PF07139.9;DUF1387;	30.8	3.1e-12
TRINITY_DN14051_c1_g1	I1GEC9_AMPQE/41-116	I1GEC9.1 PF00595.22;PDZ;	52	3e-13
TRINITY_DN14051_c1_g2	E9HM72_DAPPU/23-156	E9HM72.1 PF04145.13;Ctr;	31.7	9.1e-08
TRINITY_DN14051_c2_g3	I1FL41_AMPQE/29-204	I1FL41.1 PF03357.19;Snf7;	66.3	1.4e-50
TRINITY_DN14052_c0_g4	C3ZEC2_BRAFL/11-187	C3ZEC2.1 PF02223.15;Thymidylate_kin;	58.1	2.4e-54
TRINITY_DN14054_c0_g4	A0A058ZBP2_9EUKA/271-490	A0A058ZBP2.1 PF04389.15;Peptidase_M28;	54.1	3.7e-54
TRINITY_DN14054_c0_g7	I1EYB4_AMPQE/14-91	I1EYB4.1 PF14542.4;Acetyltransf_CG;	61.8	3.3e-19
TRINITY_DN14055_c2_g3	W4ZA29_STRPU/104-189	W4ZA29.1 PF00078.25;RVT_1;	66.7	2e-09
TRINITY_DN14055_c3_g1	I1F9C1_AMPQE/66-232	I1F9C1.1 PF04750.12;Far-17a_AIG1;	40.4	6.6e-28
TRINITY_DN14055_c3_g3	A7S9E6_NEMVE/98-223	A7S9E6.1 PF01529.18;zf-DHHC;	61.6	4e-40
TRINITY_DN14057_c1_g1	I1GHA8_AMPQE/17-165	I1GHA8.1 PF00857.18;Isochorismatase;	77.2	1.8e-59
TRINITY_DN14057_c2_g1	A0A067QZL0_ZOONE/57-175	A0A067QZL0.1 PF07986.10;TBCC;	55.5	1.6e-33
TRINITY_DN14057_c2_g5	I1G2H4_AMPQE/359-452	I1G2H4.1 PF03131.15;bZIP_Maf;	54.5	4.9e-17
TRINITY_DN14058_c0_g2	C3Y8C9_BRAFL/90-537	C3Y8C9.1 PF02516.12;STT3;	87	1.8e-120
TRINITY_DN14060_c1_g1	K1RH95_CRAGI/9-672	K1RH95.1 PF00063.19;Myosin_head;	53.3	5.1e-73
TRINITY_DN14060_c2_g2	L5M1Z5_MYODS/1-266	L5M1Z5.1 PF02515.15;CoA_transf_3;	54.8	5.2e-35
TRINITY_DN14060_c2_g3	I1GEB2_AMPQE/101-274	I1GEB2.1 PF00929.22;RNase_T;	64.7	4.4e-63
TRINITY_DN14060_c2_g4	A0A0D2X080_CAPO3/58-407	A0A0D2X080.1 PF02515.15;CoA_transf_3;	67.5	8.7e-62
TRINITY_DN14060_c2_g8	I1GEB2_AMPQE/101-274	I1GEB2.1 PF00929.22;RNase_T;	59.3	4.3e-23
TRINITY_DN14062_c0_g12	A0A085N576_9BILA/25-83	A0A085N576.1 PF13683.4;rve_3;	57.6	6.1e-12
TRINITY_DN14062_c0_g14	A0A085N2U0_9BILA/2037-2197	A0A085N2U0.1 PF00078.25;RVT_1;	70.2	1.9e-62
TRINITY_DN14062_c0_g2	A0A085N2U0_9BILA/2037-2197	A0A085N2U0.1 PF00078.25;RVT_1;	70.8	1e-62
TRINITY_DN14062_c0_g6	W4ZHQ4_STRPU/140-255	W4ZHQ4.1 PF00665.24;rve;	71.7	4.4e-35
TRINITY_DN14063_c2_g11	I1FIU3_AMPQE/1142-1342	I1FIU3.1 PF01410.16;COLFI;	50.2	8.9e-58
TRINITY_DN14063_c2_g6	V4AF69_LOTGI/26-390	V4AF69.1 PF16499.3;Melibiase_2;	55.6	2.7e-115
TRINITY_DN14065_c1_g1	I1G0C6_AMPQE/10-341	I1G0C6.1 PF00225.21;Kinesin;	74.2	1e-131
TRINITY_DN14065_c2_g8	HACD1_HUMAN/119-280	B0YJ81.1 PF04387.12;PTPLA;	50.6	9.6e-40
TRINITY_DN14066_c1_g7	W7N0F7_GIBM7/514-693	W7N0F7.1 PF02816.16;Alpha_kinase;	39.2	2e-19
TRINITY_DN14067_c0_g1	I1FKS6_AMPQE/169-257	I1FKS6.1 PF02023.15;SCAN;	65.2	3.4e-24
TRINITY_DN14071_c0_g3	H3CGY6_TETNG/275-488	H3CGY6.1 PF12348.6;CLASP_N;	51.2	1.1e-59
TRINITY_DN14073_c4_g1	M3YPM6_MUSPF/86-164	M3YPM6.1 PF00595.22;PDZ;	43.6	4.2e-13
TRINITY_DN14075_c0_g1	F1PXY4_CANLF/62-151	F1PXY4.2 PF00153.25;Mito_carr;	80	5.3e-37
TRINITY_DN14076_c3_g1	I1F8W1_AMPQE/22-399	I1F8W1.1 PF10142.7;PhoPQ_related;	54.7	1.9e-54
TRINITY_DN14076_c3_g5	I1FE39_AMPQE/10-171	I1FE39.3 PF00071.20;Ras;	54.6	6.5e-34
TRINITY_DN14077_c0_g1	C3YS62_BRAFL/1-301	C3YS62.1 PF15014.4;CLN5;	56.9	4.6e-91
TRINITY_DN14077_c0_g2	M5WT69_PRUPE/136-299	M5WT69.1 PF00156.25;Pribosyltran;	57.1	2.6e-43
TRINITY_DN14077_c0_g7	W5MGC2_LEPOC/33-335	W5MGC2.1 PF15014.4;CLN5;	65.9	1.3e-07
TRINITY_DN14078_c1_g2	J3LDS1_ORYBR/1229-1496	J3LDS1.1 PF00856.26;SET;	43.2	1.2e-37
TRINITY_DN14081_c2_g3	I1FA42_AMPQE/1-118	I1FA42.1 PF05361.10;PP1_inhibitor;	48.3	1.7e-06
TRINITY_DN14082_c0_g1	F6WAJ0_CIOIN/70-202	F6WAJ0.2 PF00004.27;AAA;	67.7	7.7e-48
TRINITY_DN14082_c0_g2	RS14_CAEEL/30-148	P48150.1 PF00411.17;Ribosomal_S11;	92.4	6.7e-55
TRINITY_DN14082_c1_g3	I1G531_AMPQE/589-656	I1G531.1 PF12796.5;Ank_2;	65	6.1e-06
TRINITY_DN14084_c0_g1	E9HNJ1_DAPPU/10-211	E9HNJ1.1 PF00106.23;adh_short;	78.6	2.1e-88
TRINITY_DN14085_c0_g3	G3TG84_LOXAF/4-92	G3TG84.1 PF00031.19;Cystatin;	47.1	1.5e-16
TRINITY_DN14088_c1_g1	T1ISR9_STRMM/272-336	T1ISR9.1 PF00013.27;KH_1;	52.4	5.6e-06
TRINITY_DN14091_c0_g9	A0A0P7WR53_9TELE/316-385	A0A0P7WR53.1 PF00076.20;RRM_1;	45.1	2.1e-10
TRINITY_DN14092_c2_g1	W4XKR2_STRPU/112-462	W4XKR2.1 PF05060.12;MGAT2;	45.3	8.1e-98
TRINITY_DN14092_c2_g2	I1GH02_AMPQE/777-904	I1GH02.1 PF04153.16;NOT2_3_5;	79.7	1.2e-55
TRINITY_DN14094_c1_g11	I1FNC1_AMPQE/197-555	I1FNC1.1 PF01504.16;PIP5K;	50.4	2.4e-87
TRINITY_DN14097_c0_g3	G7PIZ9_MACFA/566-906	G7PIZ9.1 PF00493.21;MCM;	72.1	4.7e-62
TRINITY_DN14098_c0_g1	I1G2V0_AMPQE/97-323	I1G2V0.1 PF02666.13;PS_Dcarbxylase;	54.4	1.1e-58
TRINITY_DN14098_c0_g2	I1FBT3_AMPQE/25-194	I1FBT3.1 PF00621.18;RhoGEF;	58.5	6.6e-47
TRINITY_DN14098_c0_g4	I1G2R3_AMPQE/35-113	I1G2R3.1 PF11326.6;DUF3128;	46.6	2.3e-10
TRINITY_DN14099_c1_g2	H2LFK8_ORYLA/15-155	H2LFK8.1 PF05175.12;MTS;	49	6.9e-26
TRINITY_DN14099_c2_g1	A0A0Q9XFD3_DROMO/14-272	A0A0Q9XFD3.1 PF00069.23;Pkinase;	48.9	8.3e-11
TRINITY_DN14101_c0_g2	I1G1Z7_AMPQE/13-293	I1G1Z7.1 PF05462.9;Dicty_CAR;	21.6	1.6e-09
TRINITY_DN14102_c5_g1	I1G992_AMPQE/1-173	I1G992.1 PF00025.19;Arf;	93	1.8e-32
TRINITY_DN14102_c5_g2	I1F5T8_AMPQE/140-254	I1F5T8.1 PF00373.16;FERM_M;	52.6	1.2e-14
TRINITY_DN14102_c5_g3	W4XMP1_STRPU/144-185	W4XMP1.1 PF00400.30;WD40;	57.5	1.2e-07
TRINITY_DN14102_c5_g5	A7SAK2_NEMVE/123-268	A7SAK2.1 PF00075.22;RNase_H;	64.6	5.1e-48
TRINITY_DN14104_c4_g1	I1EXX7_AMPQE/5-102	I1EXX7.1 PF00169.27;PH;	35.5	5.7e-10
TRINITY_DN14104_c5_g2	D6WCM1_TRICA/94-245	D6WCM1.1 PF00787.22;PX;	50.3	1.4e-33
TRINITY_DN14106_c0_g1	I1FXF7_AMPQE/5-162	I1FXF7.1 PF04658.11;TAFII55_N;	66.5	3.8e-51
TRINITY_DN14108_c0_g3	I1FYB2_AMPQE/282-539	I1FYB2.1 PF07714.15;Pkinase_Tyr;	82	2.4e-78
TRINITY_DN14109_c2_g3	V4C8S5_LOTGI/304-525	V4C8S5.1 PF00149.26;Metallophos;	59.7	1.7e-78
TRINITY_DN14110_c0_g1	K1QDS3_CRAGI/11-80	K1QDS3.1 PF03735.12;ENT;	68.8	1e-14
TRINITY_DN14111_c3_g1	F0Z8M3_DICPU/222-344	F0Z8M3.1 PF05721.11;PhyH;	49.6	1.8e-26
TRINITY_DN14111_c3_g2	D3BAP5_POLPA/64-360	D3BAP5.1 PF05721.11;PhyH;	38	1.1e-51
TRINITY_DN14114_c3_g3	I1G8N8_AMPQE/1-256	I1G8N8.1 PF00899.19;ThiF;	74	1.1e-78
TRINITY_DN14114_c4_g1	I1G6D4_AMPQE/11-113	I1G6D4.1 PF00169.27;PH;	46.1	1.8e-16
TRINITY_DN14116_c0_g1	G3SVA6_LOXAF/284-503	G3SVA6.1 PF07724.12;AAA_2;	81.2	1.2e-24
TRINITY_DN14116_c0_g3	A0A0P8XX13_DROAN/4-151	A0A0P8XX13.1 PF00849.20;PseudoU_synth_2;	50.3	9.2e-31
TRINITY_DN14118_c0_g1	I1GHE0_AMPQE/17-318	I1GHE0.1 PF05462.9;Dicty_CAR;	38.4	6.7e-40
TRINITY_DN14119_c0_g2	C3Z3V2_BRAFL/15-361	C3Z3V2.1 PF01070.16;FMN_dh;	61.8	1.2e-119
TRINITY_DN14120_c3_g2	J9JN11_ACYPI/165-350	J9JN11.1 PF14572.4;Pribosyl_synth;	54.6	6.8e-34
TRINITY_DN14120_c3_g6	I1FMH2_AMPQE/31-124	I1FMH2.1 PF12796.5;Ank_2;	58.9	5e-13
TRINITY_DN14121_c1_g1	C3YWT2_BRAFL/215-414	C3YWT2.1 PF10469.7;AKAP7_NLS;	32.5	7.5e-19
TRINITY_DN14121_c1_g5	C3Z0K9_BRAFL/21-178	C3Z0K9.1 PF14580.4;LRR_9;	50.6	6.4e-38
TRINITY_DN14121_c3_g10	T1ILV8_STRMM/85-222	T1ILV8.1 PF00258.23;Flavodoxin_1;	66.4	6.1e-43
TRINITY_DN14121_c3_g2	I1FX52_AMPQE/21-535	I1FX52.1 PF04916.11;Phospholip_B;	53.6	9.9e-160
TRINITY_DN14127_c2_g1	I1FBP7_AMPQE/13-280	I1FBP7.1 PF01008.15;IF-2B;	64.6	2.7e-89
TRINITY_DN14127_c3_g1	L8GQA0_ACACA/498-564	L8GQA0.1 PF01363.19;FYVE;	65.6	2.6e-22
TRINITY_DN14127_c3_g6	I1F9U0_AMPQE/1431-1677	I1F9U0.1 PF00002.22;7tm_2;	39.2	1.3e-31
TRINITY_DN14128_c3_g1	C3YDR7_BRAFL/29-399	C3YDR7.1 PF01979.18;Amidohydro_1;	53.5	1.6e-112
TRINITY_DN14128_c3_g6	T1G7A7_HELRO/1-66	T1G7A7.1 PF10224.7;DUF2205;	67.2	1.9e-13
TRINITY_DN14128_c3_g9	A0A0D9RHR4_CHLSB/118-291	A0A0D9RHR4.1 PF10602.7;RPN7;	68.7	9.6e-61
TRINITY_DN1412_c0_g1	I1GCB2_AMPQE/397-501	I1GCB2.1 PF00085.18;Thioredoxin;	65.4	8.7e-35
TRINITY_DN14131_c0_g1	I1G727_AMPQE/53-204	I1G727.1 PF14538.4;Raptor_N;	78.9	4.9e-70
TRINITY_DN14131_c0_g4	W4XG34_STRPU/20-192	W4XG34.1 PF12717.5;Cnd1;	50.6	1.8e-34
TRINITY_DN14134_c3_g3	W4YSH5_STRPU/32-524	W4YSH5.1 PF00083.22;Sugar_tr;	29.9	1.8e-47
TRINITY_DN14137_c0_g1	I1FBM8_AMPQE/22-310	I1FBM8.1 PF00069.23;Pkinase;	83.1	1.4e-22
TRINITY_DN14137_c2_g4	T1FN38_HELRO/30-318	T1FN38.1 PF00069.23;Pkinase;	72.1	7.1e-59
TRINITY_DN14137_c2_g6	M4AC49_XIPMA/60-348	M4AC49.1 PF00069.23;Pkinase;	83.3	5e-08
TRINITY_DN14140_c0_g1	I1G5M7_AMPQE/39-108	I1G5M7.1 PF01302.23;CAP_GLY;	47.2	1.8e-10
TRINITY_DN14140_c0_g2	I1G7M6_AMPQE/13-116	I1G7M6.1 PF02991.14;Atg8;	57.3	5e-18
TRINITY_DN14140_c0_g3	B3RVQ8_TRIAD/34-153	B3RVQ8.1 PF04410.12;Gar1;	65.5	1.4e-35
TRINITY_DN14141_c0_g1	I3KAV3_ORENI/17-52	I3KAV3.1 PF02197.15;RIIa;	82.9	1.2e-07
TRINITY_DN14141_c0_g2	I1G7C6_AMPQE/388-521	I1G7C6.1 PF01764.23;Lipase_3;	56.7	3.1e-38
TRINITY_DN14141_c1_g1	I1G7C3_AMPQE/26-164	I1G7C3.1 PF10033.7;ATG13;	41	3.1e-22
TRINITY_DN14142_c0_g1	E9HEX6_DAPPU/8-339	E9HEX6.1 PF16363.3;GDP_Man_Dehyd;	70.3	7.8e-108
TRINITY_DN14142_c0_g3	B3RSP1_TRIAD/5-330	B3RSP1.1 PF00009.25;GTP_EFTU;	79.1	6.1e-144
TRINITY_DN14142_c0_g6	H2YMS6_CIOSA/571-688	H2YMS6.1 PF03764.16;EFG_IV;	79.7	6.2e-55
TRINITY_DN14142_c0_g7	I1FLB9_AMPQE/493-934	I1FLB9.1 PF13086.4;AAA_11;	43.3	2.1e-80
TRINITY_DN14143_c1_g1	I1F0E5_AMPQE/19-279	I1F0E5.1 PF03619.14;Solute_trans_a;	63.1	1.3e-93
TRINITY_DN14143_c1_g4	I1FAM3_AMPQE/34-320	I1FAM3.1 PF05004.11;IFRD;	35.9	8.2e-34
TRINITY_DN14143_c1_g7	I1FX50_AMPQE/184-318	I1FX50.1 PF07039.9;DUF1325;	77.8	1.3e-53
TRINITY_DN14148_c0_g1	A7RZE5_NEMVE/152-294	A7RZE5.1 PF10607.7;CLTH;	53.5	1.4e-36
TRINITY_DN14149_c0_g1	D2VPT3_NAEGR/220-433	D2VPT3.1 PF07002.14;Copine;	56.5	1.6e-19
TRINITY_DN14149_c0_g5	L8H0H7_ACACA/409-628	L8H0H7.1 PF07002.14;Copine;	61.3	1.3e-19
TRINITY_DN14151_c3_g1	I1GJ77_AMPQE/15-210	I1GJ77.1 PF01852.17;START;	52.6	4.5e-59
TRINITY_DN14151_c4_g1	I1FMZ5_AMPQE/93-242	I1FMZ5.1 PF03031.16;NIF;	70.7	4.1e-57
TRINITY_DN14152_c0_g3	I1FF15_AMPQE/1208-1623	I1FF15.1 PF12698.5;ABC2_membrane_3;	49.6	4.8e-65
TRINITY_DN14154_c0_g1	I1GFA5_AMPQE/917-1173	I1GFA5.1 PF07993.10;NAD_binding_4;	45.6	7.9e-48
TRINITY_DN14155_c0_g2	M4ANG0_XIPMA/229-304	M4ANG0.1 PF05093.11;CIAPIN1;	66.7	1.4e-20
TRINITY_DN14156_c0_g1	I1GC85_AMPQE/121-336	I1GC85.1 PF00112.21;Peptidase_C1;	59.3	5.1e-71
TRINITY_DN14156_c0_g2	I1GFJ7_AMPQE/124-339	I1GFJ7.1 PF00112.21;Peptidase_C1;	62	5e-79
TRINITY_DN14158_c2_g3	H2U4Y4_TAKRU/464-572	H2U4Y4.1 PF03143.15;GTP_EFTU_D3;	71.6	4.5e-38
TRINITY_DN14158_c2_g4	I1FBZ6_AMPQE/86-336	I1FBZ6.1 PF00112.21;Peptidase_C1;	62.5	5e-101
TRINITY_DN14158_c2_g6	I1FL07_AMPQE/253-532	I1FL07.1 PF00009.25;GTP_EFTU;	76.2	6.6e-124
TRINITY_DN14158_c3_g1	H2MGR0_ORYLA/98-140	H2MGR0.1 PF13639.4;zf-RING_2;	68.3	8.9e-11
TRINITY_DN14159_c0_g2	G2FVV3_9FIRM/138-229	G2FVV3.1 PF17170.2;DUF5128;	37	1.2e-06
TRINITY_DN14161_c3_g1	A7RMV6_NEMVE/41-145	A7RMV6.1 PF00085.18;Thioredoxin;	49	5.9e-23
TRINITY_DN14161_c4_g1	I1G0P6_AMPQE/238-303	I1G0P6.1 PF00191.18;Annexin;	56.9	6.1e-11
TRINITY_DN14162_c2_g1	I1EKP5_AMPQE/32-110	I1EKP5.1 PF00533.24;BRCT;	48.7	1.2e-12
TRINITY_DN14162_c3_g4	B3RP02_TRIAD/46-390	B3RP02.1 PF00069.23;Pkinase;	37.4	3e-79
TRINITY_DN14163_c3_g5	I1G3B9_AMPQE/37-605	I1G3B9.1 PF00995.21;Sec1;	49.1	4.3e-162
TRINITY_DN14164_c3_g1	W5K2N1_ASTMX/17-189	W5K2N1.1 PF10188.7;Oscp1;	48.6	5.4e-38
TRINITY_DN14164_c3_g2	K8GQZ5_9CYAN/7-825	K8GQZ5.1 PF00723.19;Glyco_hydro_15;	58.2	2.6e-92
TRINITY_DN14165_c0_g1	I1G6J9_AMPQE/375-525	I1G6J9.1 PF13925.4;Katanin_con80;	52.9	3.3e-31
TRINITY_DN14168_c0_g2	B9HKA4_POPTR/14-168	B9HKA4.1 PF03079.12;ARD;	66.5	1.1e-59
TRINITY_DN14170_c0_g2	I1G298_AMPQE/363-657	I1G298.1 PF00850.17;Hist_deacetyl;	89.5	3.2e-160
TRINITY_DN14171_c1_g3	I1FWM3_AMPQE/559-832	I1FWM3.1 PF02434.14;Fringe;	35.6	1.7e-29
TRINITY_DN14171_c1_g5	I1FWM3_AMPQE/153-415	I1FWM3.1 PF02434.14;Fringe;	33.8	1.1e-33
TRINITY_DN14172_c3_g1	U3K1L5_FICAL/17-83	U3K1L5.1 PF03931.13;Skp1_POZ;	54.7	1.9e-20
TRINITY_DN14172_c3_g2	F6TI28_CIOIN/13-306	F6TI28.2 PF00069.23;Pkinase;	63	1.4e-69
TRINITY_DN14173_c0_g1	I1GJG9_AMPQE/123-598	I1GJG9.1 PF04114.12;Gaa1;	37.1	1.3e-73
TRINITY_DN14173_c1_g1	I1FHA2_AMPQE/135-363	I1FHA2.1 PF00557.22;Peptidase_M24;	56.2	9.2e-81
TRINITY_DN14173_c3_g1	H9GKZ2_ANOCA/19-413	H9GKZ2.2 PF09507.8;CDC27;	51.3	7.7e-23
TRINITY_DN14174_c0_g4	A7S2A2_NEMVE/4-133	A7S2A2.1 PF15305.4;IFT43;	57.6	1.4e-26
TRINITY_DN14175_c0_g1	I1G0V7_AMPQE/34-506	I1G0V7.1 PF00067.20;p450;	43	3.1e-102
TRINITY_DN14181_c2_g2	I1FTR2_AMPQE/331-498	I1FTR2.1 PF04727.11;ELMO_CED12;	60	2e-51
TRINITY_DN14182_c1_g1	L5LHY6_MYODS/86-343	L5LHY6.1 PF01369.18;Sec7;	41.6	2.2e-58
TRINITY_DN14183_c0_g2	I1GBT2_AMPQE/221-541	I1GBT2.1 PF05679.14;CHGN;	60.4	4.5e-37
TRINITY_DN14184_c0_g2	I1GEW8_AMPQE/137-452	I1GEW8.1 PF00009.25;GTP_EFTU;	76.3	2.1e-141
TRINITY_DN14188_c0_g4	W5K587_ASTMX/1123-1185	W5K587.1 PF07653.15;SH3_2;	46	4.7e-08
TRINITY_DN14191_c0_g1	I1FZX2_AMPQE/68-323	I1FZX2.1 PF00069.23;Pkinase;	76.3	1.1e-112
TRINITY_DN14191_c0_g2	I1FAS4_AMPQE/210-348	I1FAS4.1 PF06565.10;DUF1126;	73.4	1.6e-58
TRINITY_DN14193_c0_g1	M4AKG1_XIPMA/171-242	M4AKG1.1 PF03719.13;Ribosomal_S5_C;	77.8	2e-26
TRINITY_DN14193_c0_g2	I1GHG0_AMPQE/40-275	I1GHG0.1 PF06966.10;DUF1295;	57.3	2.3e-78
TRINITY_DN14194_c0_g1	K1QHI2_CRAGI/92-214	K1QHI2.1 PF13893.4;RRM_5;	55.4	8.7e-34
TRINITY_DN14196_c0_g3	F7ELL7_XENTR/1700-1941	F7ELL7.1 PF00102.25;Y_phosphatase;	49.3	1.2e-52
TRINITY_DN14200_c0_g2	I1FF25_AMPQE/95-389	I1FF25.1 PF01213.17;CAP_N;	59	1.1e-18
TRINITY_DN14200_c0_g3	A7SP47_NEMVE/231-369	A7SP47.1 PF00334.17;NDK;	60.7	3.1e-43
TRINITY_DN14200_c0_g5	I1FF25_AMPQE/410-566	I1FF25.1 PF08603.9;CAP_C;	59.3	9.9e-21
TRINITY_DN14201_c1_g1	I1G5H0_AMPQE/45-316	I1G5H0.1 PF00069.23;Pkinase;	100	1.4e-13
TRINITY_DN14201_c1_g3	I1G5H0_AMPQE/45-316	I1G5H0.1 PF00069.23;Pkinase;	92.3	4e-96
TRINITY_DN14202_c2_g1	K1RK98_CRAGI/12-349	K1RK98.1 PF03747.12;ADP_ribosyl_GH;	38.9	2e-53
TRINITY_DN14203_c0_g1	G1KPC3_ANOCA/381-566	G1KPC3.2 PF05241.10;EBP;	53.9	1.4e-16
TRINITY_DN14204_c2_g1	I1FS22_AMPQE/429-667	I1FS22.1 PF00102.25;Y_phosphatase;	67.9	1.2e-26
TRINITY_DN14204_c2_g2	F6SDL3_ORNAN/38-401	F6SDL3.1 PF07000.9;DUF1308;	47.8	2.5e-36
TRINITY_DN14205_c5_g1	I1FMN2_AMPQE/56-219	I1FMN2.1 PF00071.20;Ras;	44.6	1.5e-23
TRINITY_DN14206_c1_g1	I1GCN5_AMPQE/5-178	I1GCN5.1 PF06229.10;FRG1;	59.2	1.6e-48
TRINITY_DN14206_c3_g1	H3F7Z0_PRIPA/109-149	H3F7Z0.1 PF00400.30;WD40;	75	1e-09
TRINITY_DN14206_c3_g4	A7S8G1_NEMVE/21-113	A7S8G1.1 PF04718.13;ATP-synt_G;	50	4.3e-18
TRINITY_DN14206_c3_g6	T1EEB1_HELRO/138-399	T1EEB1.1 PF00009.25;GTP_EFTU;	76.4	9.6e-111
TRINITY_DN14207_c0_g2	W4Z1R9_STRPU/1-235	W4Z1R9.1 PF15397.4;DUF4618;	28.7	2.3e-15
TRINITY_DN14210_c0_g2	I1E6R6_AMPQE/4-164	I1E6R6.1 PF05729.10;NACHT;	39.5	9.1e-20
TRINITY_DN14211_c0_g1	I1FYU3_AMPQE/793-988	I1FYU3.1 PF01852.17;START;	50.3	6.6e-54
TRINITY_DN14211_c1_g1	I1G1S2_AMPQE/24-275	I1G1S2.1 PF00069.23;Pkinase;	92.1	2.6e-60
TRINITY_DN14211_c2_g1	I1F7I0_AMPQE/102-163	I1F7I0.1 PF00226.29;DnaJ;	79.1	2.2e-12
TRINITY_DN14211_c2_g2	V4BE20_LOTGI/379-602	V4BE20.1 PF01747.15;ATP-sulfurylase;	74.1	8.3e-100
TRINITY_DN14213_c3_g4	I1EY60_AMPQE/267-498	I1EY60.1 PF00078.25;RVT_1;	57.4	4e-13
TRINITY_DN14215_c0_g1	I1GCB8_AMPQE/77-400	I1GCB8.1 PF01301.17;Glyco_hydro_35;	56.8	2.2e-107
TRINITY_DN14216_c0_g1	E7FF53_DANRE/963-1014	E7FF53.1 PF14604.4;SH3_9;	56.9	9.3e-11
TRINITY_DN14216_c0_g2	W5ML23_LEPOC/16-260	W5ML23.1 PF07714.15;Pkinase_Tyr;	33.5	4.5e-19
TRINITY_DN14219_c1_g5	G3UD35_LOXAF/40-200	G3UD35.1 PF01554.16;MatE;	46.4	9.4e-23
TRINITY_DN14222_c0_g1	I1FB07_AMPQE/69-438	I1FB07.1 PF07857.10;TMEM144;	55.8	5.9e-115
TRINITY_DN14223_c1_g1	I1G9L1_AMPQE/29-126	I1G9L1.1 PF13905.4;Thioredoxin_8;	67.6	5.8e-23
TRINITY_DN14224_c0_g2	H2Y8X0_CIOSA/290-489	H2Y8X0.1 PF01144.21;CoA_trans;	70.1	3.8e-76
TRINITY_DN14224_c0_g3	A9UVE4_MONBE/30-261	A9UVE4.1 PF01144.21;CoA_trans;	72.3	3.8e-92
TRINITY_DN14224_c0_g5	F2TYA4_SALR5/43-274	F2TYA4.1 PF01144.21;CoA_trans;	67.9	5.3e-39
TRINITY_DN14226_c0_g1	I1GHW6_AMPQE/54-169	I1GHW6.1 PF10018.7;Med4;	59.3	1.1e-26
TRINITY_DN14226_c0_g3	I1GHW4_AMPQE/25-338	I1GHW4.1 PF00248.19;Aldo_ket_red;	70.2	1e-129
TRINITY_DN14226_c0_g5	T1JTJ3_TETUR/137-186	T1JTJ3.1 PF03540.11;TFIID_30kDa;	78	1.4e-13
TRINITY_DN14228_c0_g1	V8NYI9_OPHHA/1-194	V8NYI9.1 PF00067.20;p450;	44.4	1.5e-22
TRINITY_DN14228_c0_g4	U3IAU6_ANAPL/40-497	U3IAU6.1 PF00067.20;p450;	42.5	2.1e-38
TRINITY_DN14230_c0_g2	K1QRR1_CRAGI/6-78	K1QRR1.1 PF13499.4;EF-hand_7;	50.7	3.5e-10
TRINITY_DN14232_c0_g1	C3ZH16_BRAFL/19-57	C3ZH16.1 PF13923.4;zf-C3HC4_2;	61.5	6.8e-08
TRINITY_DN14234_c1_g3	I1FS42_AMPQE/166-272	I1FS42.1 PF10199.7;Adaptin_binding;	38.3	8.4e-11
TRINITY_DN14234_c1_g4	V3Z9K9_LOTGI/11-123	V3Z9K9.1 PF04275.12;P-mevalo_kinase;	50.9	1.2e-25
TRINITY_DN14235_c1_g3	G8ZYD8_TORDC/323-472	G8ZYD8.1 PF00929.22;RNase_T;	53.3	9.2e-38
TRINITY_DN14235_c1_g6	F7B9P4_HORSE/16-177	F7B9P4.1 PF00071.20;Ras;	89.2	4.4e-45
TRINITY_DN14236_c0_g1	R4GB01_ANOCA/16-322	R4GB01.1 PF03820.15;Mtc;	63.3	1.1e-111
TRINITY_DN14237_c0_g2	I1GBA6_AMPQE/1390-1488	I1GBA6.1 PF00530.16;SRCR;	54.3	1.1e-20
TRINITY_DN14238_c0_g1	A0A0J7KK54_LASNI/23-247	A0A0J7KK54.1 PF09753.7;Use1;	43.7	9.1e-11
TRINITY_DN14239_c1_g3	B7QH15_IXOSC/257-523	B7QH15.1 PF00324.19;AA_permease;	67.9	1.7e-63
TRINITY_DN14239_c1_g6	A7SLX0_NEMVE/124-317	A7SLX0.1 PF00617.17;RasGEF;	50.9	1.1e-40
TRINITY_DN14239_c1_g7	I3J3N0_ORENI/832-1100	I3J3N0.1 PF03522.13;SLC12;	44.6	6.1e-67
TRINITY_DN14242_c2_g2	I1GAQ8_AMPQE/16-157	I1GAQ8.1 PF12762.5;DDE_Tnp_IS1595;	45.6	5.5e-07
TRINITY_DN14243_c1_g1	T1IR20_STRMM/1147-1298	T1IR20.1 PF00270.27;DEAD;	90.1	1e-73
TRINITY_DN14243_c1_g12	I1GF87_AMPQE/293-497	I1GF87.1 PF14681.4;UPRTase;	68.8	1.8e-76
TRINITY_DN14243_c1_g2	A7SV47_NEMVE/32-94	A7SV47.1 PF01176.17;eIF-1a;	85.7	8.8e-26
TRINITY_DN14243_c1_g6	F1PPH7_CANLF/212-345	F1PPH7.2 PF00004.27;AAA;	91.8	3.2e-65
TRINITY_DN14245_c2_g2	I1G416_AMPQE/1-284	I1G416.1 PF16050.3;CDC73_N;	57.8	4.3e-78
TRINITY_DN14245_c3_g4	W5MN94_LEPOC/53-439	W5MN94.1 PF00202.19;Aminotran_3;	69	1.9e-161
TRINITY_DN14245_c3_g7	I1GBF5_AMPQE/298-401	I1GBF5.1 PF00169.27;PH;	60.8	1.3e-30
TRINITY_DN14246_c0_g2	I1FXE3_AMPQE/69-234	I1FXE3.1 PF00270.27;DEAD;	78.2	6e-67
TRINITY_DN14248_c0_g1	F2US54_SALR5/65-132	F2US54.1 PF12796.5;Ank_2;	46.6	5e-07
TRINITY_DN14248_c0_g2	F2US54_SALR5/65-132	F2US54.1 PF12796.5;Ank_2;	46.7	6.3e-07
TRINITY_DN14249_c2_g1	C3Z790_BRAFL/57-480	C3Z790.1 PF11864.6;DUF3384;	42.6	1.6e-90
TRINITY_DN14249_c2_g9	RPB7_BOVIN/8-77	Q5E9B8.1 PF03876.15;SHS2_Rpb7-N;	88.6	6.3e-30
TRINITY_DN14251_c0_g1	I1FSF5_AMPQE/695-932	I1FSF5.1 PF07717.14;OB_NTP_bind;	48.5	1e-48
TRINITY_DN14251_c0_g3	F7BXJ7_XENTR/93-191	F7BXJ7.1 PF00452.17;Bcl-2;	34.1	1.7e-10
TRINITY_DN14251_c0_g4	I1GGB5_AMPQE/11-426	I1GGB5.1 PF01222.15;ERG4_ERG24;	64.1	1.5e-167
TRINITY_DN14252_c1_g2	I1FFG6_AMPQE/772-996	I1FFG6.1 PF16095.3;COR;	26.2	1.8e-09
TRINITY_DN14253_c1_g1	C3ZKT2_BRAFL/185-363	C3ZKT2.1 PF05712.11;MRG;	58.3	2.8e-41
TRINITY_DN14254_c2_g1	I1FM15_AMPQE/194-235	I1FM15.1 PF05182.11;Fip1;	76.2	6.3e-12
TRINITY_DN14254_c2_g4	F7HAG1_CALJA/15-83	F7HAG1.1 PF00366.18;Ribosomal_S17;	54.7	1.9e-07
TRINITY_DN14255_c0_g3	I1FRP1_AMPQE/324-486	I1FRP1.1 PF00078.25;RVT_1;	59.8	1.5e-36
TRINITY_DN14264_c1_g1	A0A087YNR3_POEFO/127-290	A0A087YNR3.2 PF00160.19;Pro_isomerase;	60	1.5e-30
TRINITY_DN14264_c1_g2	I1G048_AMPQE/1856-2108	I1G048.1 PF00001.19;7tm_1;	50.8	1.3e-64
TRINITY_DN14265_c0_g2	W5MW83_LEPOC/227-338	W5MW83.1 PF07757.11;AdoMet_MTase;	46.2	1.8e-33
TRINITY_DN14265_c0_g3	I1G5D2_AMPQE/5-107	I1G5D2.1 PF00466.18;Ribosomal_L10;	69.6	4.4e-15
TRINITY_DN14268_c1_g13	I1FJY2_AMPQE/94-281	I1FJY2.1 PF00907.20;T-box;	84.1	3.7e-89
TRINITY_DN14268_c1_g4	K1PVT3_CRAGI/85-288	K1PVT3.1 PF01966.20;HD;	41.8	6.9e-36
TRINITY_DN14268_c1_g6	I1GIX0_AMPQE/183-277	I1GIX0.1 PF00169.27;PH;	53.6	1.3e-21
TRINITY_DN14269_c3_g3	H2VCU8_TAKRU/302-380	H2VCU8.1 PF00400.30;WD40;	43.4	1.7e-11
TRINITY_DN14271_c3_g1	I1GF70_AMPQE/33-193	I1GF70.1 PF01652.16;IF4E;	66.4	2e-53
TRINITY_DN14273_c2_g1	A9UTB8_MONBE/1-66	A9UTB8.1 PF01246.18;Ribosomal_L24e;	87.9	4.6e-28
TRINITY_DN14274_c1_g1	I1FP38_AMPQE/5-48	I1FP38.1 PF00569.15;ZZ;	75	3e-13
TRINITY_DN14274_c1_g2	A0A0D2U3B7_CAPO3/5-177	A0A0D2U3B7.1 PF00025.19;Arf;	91.6	2.4e-50
TRINITY_DN14274_c1_g3	I1F9P5_AMPQE/465-970	I1F9P5.1 PF07748.11;Glyco_hydro_38C;	61.2	1.4e-46
TRINITY_DN14274_c1_g5	I1G918_AMPQE/1205-1715	I1G918.1 PF07748.11;Glyco_hydro_38C;	41.4	3.8e-111
TRINITY_DN14274_c1_g7	A7RJD9_NEMVE/5-177	A7RJD9.1 PF00025.19;Arf;	77.4	3.2e-17
TRINITY_DN14275_c0_g2	M4A3M4_XIPMA/1-121	M4A3M4.1 PF09750.7;DRY_EERY;	67.5	3.3e-08
TRINITY_DN14275_c0_g4	I1GBP5_AMPQE/352-388	I1GBP5.1 PF00400.30;WD40;	64.9	5.8e-07
TRINITY_DN14277_c0_g1	BLML2_DICDI/48-382	Q54VJ1.1 PF00144.22;Beta-lactamase;	37.6	4.6e-52
TRINITY_DN14277_c4_g1	I1GH74_AMPQE/342-601	I1GH74.1 PF00069.23;Pkinase;	76.2	3.3e-118
TRINITY_DN14277_c5_g1	V2XXA4_MONRO/1233-1416	V2XXA4.1 PF00689.19;Cation_ATPase_C;	38.5	3.8e-14
TRINITY_DN14278_c3_g10	W5K8P5_ASTMX/609-668	W5K8P5.1 PF14775.4;NYD-SP28_assoc;	53.3	7.4e-09
TRINITY_DN14278_c3_g2	T1G4R6_HELRO/5-142	T1G4R6.1 PF00179.24;UQ_con;	72	3.8e-47
TRINITY_DN14278_c3_g9	G1PYV1_MYOLU/109-255	G1PYV1.1 PF08662.9;eIF2A;	66.7	7.7e-54
TRINITY_DN14280_c0_g1	J9K0T7_ACYPI/17-290	J9K0T7.2 PF00069.23;Pkinase;	54	6.9e-27
TRINITY_DN14280_c0_g5	I1FAS0_AMPQE/25-298	I1FAS0.1 PF00069.23;Pkinase;	63.4	2.1e-51
TRINITY_DN14280_c0_g6	I1FZU0_AMPQE/1045-1568	I1FZU0.1 PF00899.19;ThiF;	62.6	2.3e-63
TRINITY_DN14281_c0_g2	I1FJK4_AMPQE/207-302	I1FJK4.1 PF13895.4;Ig_2;	41.7	1.1e-06
TRINITY_DN14281_c0_g3	I1FPY6_AMPQE/554-836	I1FPY6.1 PF07714.15;Pkinase_Tyr;	52.6	3.4e-67
TRINITY_DN14281_c0_g4	T1ISW7_STRMM/497-652	T1ISW7.1 PF16418.3;CNOT1_HEAT;	55.9	2.3e-34
TRINITY_DN14281_c0_g5	I1GJC7_AMPQE/1136-1495	I1GJC7.1 PF04054.13;Not1;	85	1.6e-183
TRINITY_DN14281_c1_g4	I1F4T0_AMPQE/237-336	I1F4T0.1 PF00153.25;Mito_carr;	72	1.3e-34
TRINITY_DN14281_c1_g5	I1F354_AMPQE/643-907	I1F354.1 PF12031.6;BAF250_C;	52.1	8.3e-69
TRINITY_DN14282_c1_g1	M7BJ27_CHEMY/162-220	M7BJ27.1 PF00640.21;PID;	43.5	1.7e-06
TRINITY_DN14283_c3_g1	I1GJQ6_AMPQE/229-285	I1GJQ6.1 PF00046.27;Homeobox;	84.2	4.4e-19
TRINITY_DN14283_c4_g1	I1G9B7_AMPQE/188-444	I1G9B7.1 PF00069.23;Pkinase;	65.5	8.6e-48
TRINITY_DN14283_c4_g2	I1FPQ4_AMPQE/116-248	I1FPQ4.1 PF14738.4;PaaSYMP;	72.1	6.4e-42
TRINITY_DN14285_c0_g1	I1EZ60_AMPQE/187-446	I1EZ60.1 PF07714.15;Pkinase_Tyr;	64.6	1e-78
TRINITY_DN14285_c0_g2	I1EZ60_AMPQE/105-164	I1EZ60.1 PF07653.15;SH3_2;	70	6.1e-09
TRINITY_DN14286_c0_g2	K3X4B6_PYTUL/46-413	K3X4B6.1 PF07992.12;Pyr_redox_2;	48.6	2.4e-88
TRINITY_DN14289_c0_g2	I1GIZ5_AMPQE/67-394	I1GIZ5.1 PF00443.27;UCH;	47.9	1.7e-87
TRINITY_DN14293_c0_g1	D6WQP1_TRICA/9-302	D6WQP1.1 PF00459.23;Inositol_P;	30.5	3.2e-32
TRINITY_DN14294_c0_g1	I1F4V8_AMPQE/52-482	I1F4V8.1 PF07690.14;MFS_1;	41.4	2.1e-88
TRINITY_DN14295_c0_g1	W4ZBE8_STRPU/175-263	W4ZBE8.1 PF06119.12;NIDO;	54.1	4.1e-13
TRINITY_DN14295_c0_g4	I1GB25_AMPQE/24-357	I1GB25.1 PF00225.21;Kinesin;	66.7	1e-37
TRINITY_DN14295_c0_g6	A0A067QVV8_ZOONE/9-339	A0A067QVV8.1 PF00225.21;Kinesin;	80.3	4.1e-96
TRINITY_DN14295_c0_g7	I1G1E4_AMPQE/444-690	I1G1E4.1 PF00002.22;7tm_2;	59.7	2.3e-11
TRINITY_DN14296_c0_g1	I1FQ42_AMPQE/107-322	I1FQ42.1 PF13672.4;PP2C_2;	52.7	5e-56
TRINITY_DN14299_c1_g1	V4BAP9_LOTGI/11-86	V4BAP9.1 PF15163.4;Meiosis_expr;	64.4	1.3e-22
TRINITY_DN14299_c2_g1	A7SD83_NEMVE/163-466	A7SD83.1 PF05192.16;MutS_III;	52.9	3.1e-80
TRINITY_DN14299_c2_g3	I1G3H1_AMPQE/51-186	I1G3H1.1 PF00640.21;PID;	87.3	1.1e-24
TRINITY_DN14300_c1_g1	I1G9C9_AMPQE/939-1216	I1G9C9.1 PF07714.15;Pkinase_Tyr;	53.2	5.7e-62
TRINITY_DN14301_c1_g1	I1FG68_AMPQE/133-308	I1FG68.1 PF04055.19;Radical_SAM;	80.7	6.1e-79
TRINITY_DN14302_c2_g2	D6WP97_TRICA/4-112	D6WP97.1 PF02109.14;DAD;	73.8	2e-38
TRINITY_DN14302_c2_g3	I1FHS7_AMPQE/470-998	I1FHS7.1 PF00955.19;HCO3_cotransp;	36.5	4.6e-61
TRINITY_DN14303_c0_g1	I1GFA7_AMPQE/88-490	I1GFA7.1 PF00854.19;PTR2;	34.8	2.8e-39
TRINITY_DN14305_c1_g2	I1G2L0_AMPQE/87-156	I1G2L0.1 PF00505.17;HMG_box;	63.2	1.9e-09
TRINITY_DN14306_c0_g1	I1FSA6_AMPQE/386-882	I1FSA6.1 PF00328.20;His_Phos_2;	42	1e-31
TRINITY_DN14306_c0_g2	W5L2A0_ASTMX/343-858	W5L2A0.1 PF00328.20;His_Phos_2;	45	1.5e-73
TRINITY_DN14306_c0_g5	I1FSA6_AMPQE/386-882	I1FSA6.1 PF00328.20;His_Phos_2;	53.3	2.2e-81
TRINITY_DN14310_c1_g2	C3Z1Y4_BRAFL/74-195	C3Z1Y4.1 PF09335.9;SNARE_assoc;	64.8	9.5e-40
TRINITY_DN14310_c2_g1	T1HA72_RHOPR/125-419	T1HA72.1 PF06027.10;SLC35F;	39.2	4.3e-38
TRINITY_DN14312_c5_g1	I1GHG4_AMPQE/39-326	I1GHG4.1 PF04190.11;DUF410;	43.9	2.3e-29
TRINITY_DN14312_c6_g1	I1GF45_AMPQE/827-940	I1GF45.1 PF16553.3;PUFD;	37.4	1.2e-11
TRINITY_DN14315_c3_g1	E4XF62_OIKDI/51-877	E4XF62.1 PF05478.9;Prominin;	26.7	4.7e-08
TRINITY_DN14319_c2_g1	I1FMA5_AMPQE/49-434	I1FMA5.1 PF07690.14;MFS_1;	53.1	1.4e-93
TRINITY_DN14319_c3_g1	C3ZVR8_BRAFL/16-170	C3ZVR8.1 PF02301.16;HORMA;	50.4	1.5e-23
TRINITY_DN14319_c3_g5	I1EDY8_AMPQE/38-241	I1EDY8.1 PF00106.23;adh_short;	43	1.1e-31
TRINITY_DN14319_c3_g6	W4ZGU8_STRPU/4-208	W4ZGU8.1 PF04622.10;ERG2_Sigma1R;	56.3	1.4e-66
TRINITY_DN14320_c0_g12	H0VL28_CAVPO/26-133	H0VL28.1 PF01392.20;Fz;	33.7	8.7e-07
TRINITY_DN14320_c0_g5	I1GCH0_AMPQE/1-303	I1GCH0.1 PF04641.10;Rtf2;	61.5	1.3e-61
TRINITY_DN14321_c0_g3	I1FX85_AMPQE/120-404	I1FX85.1 PF00246.22;Peptidase_M14;	64.2	7.1e-104
TRINITY_DN14322_c0_g1	I1G7S9_AMPQE/663-1195	I1G7S9.1 PF02738.16;Ald_Xan_dh_C2;	61.8	1.8e-94
TRINITY_DN14322_c0_g2	G1N0K5_MELGA/30-321	G1N0K5.2 PF00579.23;tRNA-synt_1b;	74.5	6.5e-126
TRINITY_DN14322_c0_g3	A0A0G4IGI5_PLABS/360-474	A0A0G4IGI5.1 PF03385.15;DUF288;	54.5	1.5e-26
TRINITY_DN14324_c0_g2	I1GHN5_AMPQE/5-95	I1GHN5.1 PF03259.15;Robl_LC7;	68.1	7.5e-24
TRINITY_DN14325_c2_g1	A7RN21_NEMVE/18-202	A7RN21.1 PF03371.13;PRP38;	48.8	1.5e-38
TRINITY_DN14325_c2_g2	A7SQT2_NEMVE/7-63	A7SQT2.1 PF00831.21;Ribosomal_L29;	84.2	2.7e-16
TRINITY_DN14325_c3_g3	I1F9H9_AMPQE/39-138	I1F9H9.1 PF06918.12;DUF1280;	71.2	9.1e-22
TRINITY_DN14326_c0_g1	I1GEI5_AMPQE/27-247	I1GEI5.1 PF03332.11;PMM;	77.8	5e-37
TRINITY_DN14328_c6_g1	H0ZFT8_TAEGU/298-476	H0ZFT8.1 PF00350.21;Dynamin_N;	74.3	6e-66
TRINITY_DN14328_c8_g1	I1GEH5_AMPQE/248-521	I1GEH5.1 PF07714.15;Pkinase_Tyr;	48.5	1.2e-74
TRINITY_DN14330_c1_g2	I1G9C1_AMPQE/718-772	I1G9C1.1 PF00010.24;HLH;	70.9	4.1e-14
TRINITY_DN14330_c1_g3	V4A575_LOTGI/13-205	V4A575.1 PF01813.15;ATP-synt_D;	74	4.2e-74
TRINITY_DN14331_c0_g1	I1GIX3_AMPQE/252-501	I1GIX3.1 PF12736.5;CABIT;	24.2	4.8e-10
TRINITY_DN14331_c3_g2	I1FLJ1_AMPQE/85-336	I1FLJ1.1 PF00069.23;Pkinase;	80.3	4.1e-102
TRINITY_DN14332_c1_g6	I1GE10_AMPQE/119-411	I1GE10.1 PF00996.16;GDI;	47.8	5.4e-75
TRINITY_DN14332_c1_g8	I1GC50_AMPQE/36-207	I1GC50.1 PF04832.10;SOUL;	52.5	2.6e-49
TRINITY_DN14333_c2_g4	A0A0P7TRP2_9TELE/314-437	A0A0P7TRP2.1 PF12894.5;ANAPC4_WD40;	61	7.6e-39
TRINITY_DN14333_c2_g6	C3Z4Y0_BRAFL/64-180	C3Z4Y0.1 PF04784.12;DUF547;	65.8	2.2e-41
TRINITY_DN14334_c0_g1	I1FY80_AMPQE/50-151	I1FY80.1 PF08551.8;DUF1751;	51	1.2e-22
TRINITY_DN14334_c1_g1	I1FX18_AMPQE/50-353	I1FX18.1 PF00814.23;Peptidase_M22;	56.6	2.5e-69
TRINITY_DN14334_c1_g4	V3ZM47_LOTGI/4-358	V3ZM47.1 PF03036.14;Perilipin;	22.8	5.4e-10
TRINITY_DN14334_c2_g2	A0A096M9J4_POEFO/121-375	A0A096M9J4.1 PF07787.10;TMEM43;	42.4	2.6e-43
TRINITY_DN14335_c0_g3	I1FE73_AMPQE/40-233	I1FE73.1 PF00149.26;Metallophos;	44.3	2.1e-57
TRINITY_DN14335_c0_g7	I1FXM5_AMPQE/41-192	I1FXM5.1 PF00078.25;RVT_1;	73	1e-06
TRINITY_DN14340_c1_g1	H2M5W8_ORYLA/4-173	H2M5W8.1 PF04573.10;SPC22;	49.1	5.2e-38
TRINITY_DN14340_c1_g2	C3XXJ4_BRAFL/24-343	C3XXJ4.1 PF00443.27;UCH;	74.7	1.2e-103
TRINITY_DN14340_c1_g3	V8PAH4_OPHHA/1469-1581	V8PAH4.1 PF12325.6;TMF_TATA_bd;	43.9	2.9e-16
TRINITY_DN14341_c0_g2	I1FM03_AMPQE/47-350	I1FM03.1 PF08449.9;UAA;	59	7.1e-93
TRINITY_DN14344_c0_g1	W4Z205_STRPU/597-694	W4Z205.1 PF00530.16;SRCR;	46.4	2.9e-18
TRINITY_DN14344_c1_g4	I1F702_AMPQE/136-268	I1F702.1 PF03464.13;eRF1_2;	73.7	3.6e-50
TRINITY_DN14346_c0_g1	A7S3U3_NEMVE/57-252	A7S3U3.1 PF00804.23;Syntaxin;	46	2.2e-42
TRINITY_DN14346_c0_g8	A7S374_NEMVE/5-154	A7S374.1 PF14933.4;CEP19;	35.4	6.5e-08
TRINITY_DN14348_c0_g11	I1GIG4_AMPQE/59-179	I1GIG4.1 PF04819.10;DUF716;	44.2	9.4e-11
TRINITY_DN14349_c1_g1	W4XDT5_STRPU/1-144	W4XDT5.1 PF01125.15;G10;	92.2	1.1e-19
TRINITY_DN14349_c2_g1	B7QIB5_IXOSC/34-192	B7QIB5.1 PF00804.23;Syntaxin;	38	1.8e-15
TRINITY_DN14349_c2_g7	I1G6T5_AMPQE/13-234	I1G6T5.1 PF01182.18;Glucosamine_iso;	56.5	1.7e-64
TRINITY_DN14350_c2_g1	I1GBS8_AMPQE/276-337	I1GBS8.1 PF01485.19;IBR;	57.4	8.4e-15
TRINITY_DN14350_c2_g6	I1FHT3_AMPQE/26-151	I1FHT3.1 PF08613.9;Cyclin;	47.9	1.7e-24
TRINITY_DN14351_c1_g3	H2PGV7_PONAB/6-96	H2PGV7.1 PF00153.25;Mito_carr;	52.9	3.4e-19
TRINITY_DN14351_c1_g5	I1GIW9_AMPQE/100-199	I1GIW9.1 PF00153.25;Mito_carr;	72	7.7e-36
TRINITY_DN14352_c0_g1	V4A2L8_LOTGI/8-201	V4A2L8.1 PF00071.20;Ras;	50	2.3e-43
TRINITY_DN14353_c1_g1	K1RNG6_CRAGI/20-373	K1RNG6.1 PF00266.17;Aminotran_5;	51.7	6.1e-111
TRINITY_DN14354_c0_g3	J9MAS1_ACYPI/238-354	J9MAS1.2 PF00665.24;rve;	51.6	1.4e-12
TRINITY_DN14355_c1_g1	I1FV88_AMPQE/71-328	I1FV88.1 PF00069.23;Pkinase;	64.3	2.5e-80
TRINITY_DN14357_c0_g1	I1GHI7_AMPQE/294-463	I1GHI7.1 PF03232.11;COQ7;	60.9	3.4e-54
TRINITY_DN14357_c2_g1	C3XZY1_BRAFL/43-345	C3XZY1.1 PF00561.18;Abhydrolase_1;	33.7	2.2e-39
TRINITY_DN14357_c3_g3	W5LA70_ASTMX/739-846	W5LA70.1 PF01843.17;DIL;	45.2	2.3e-16
TRINITY_DN14358_c1_g3	H2SIV2_TAKRU/583-755	H2SIV2.1 PF00637.18;Clathrin;	49.4	4.8e-41
TRINITY_DN14358_c1_g7	I1FVB4_AMPQE/37-283	I1FVB4.1 PF00780.20;CNH;	50.4	3.2e-57
TRINITY_DN14361_c3_g2	I1GBT5_AMPQE/295-365	I1GBT5.1 PF00076.20;RRM_1;	64.8	2e-19
TRINITY_DN14362_c0_g1	A0A0J8BBG3_BETVU/22-191	A0A0J8BBG3.1 PF13419.4;HAD_2;	38.8	2.2e-26
TRINITY_DN14363_c0_g3	A7SUI4_NEMVE/4-124	A7SUI4.1 PF00787.22;PX;	50.5	2.8e-16
TRINITY_DN14364_c0_g11	I1G9T3_AMPQE/189-505	I1G9T3.1 PF01534.15;Frizzled;	51.6	6.8e-92
TRINITY_DN14364_c0_g2	I1FQJ4_AMPQE/28-135	I1FQJ4.1 PF03874.14;RNA_pol_Rpb4;	84.3	1.6e-44
TRINITY_DN14364_c0_g3	I1G1U8_AMPQE/47-99	I1G1U8.1 PF00130.20;C1_1;	56.6	3.8e-12
TRINITY_DN14364_c0_g5	W5KEA0_ASTMX/774-877	W5KEA0.1 PF04003.10;Utp12;	61.9	2.3e-25
TRINITY_DN14364_c1_g1	F1KXE3_ASCSU/395-465	F1KXE3.1 PF00076.20;RRM_1;	74.6	2.9e-24
TRINITY_DN14365_c4_g2	A7RTF3_NEMVE/273-427	A7RTF3.1 PF13768.4;VWA_3;	52	2.1e-35
TRINITY_DN14365_c7_g4	I1FL27_AMPQE/1392-1646	I1FL27.1 PF16057.3;DUF4800;	34.1	5.4e-18
TRINITY_DN14367_c0_g2	I1FJL5_AMPQE/1216-1472	I1FJL5.1 PF05454.9;DAG1;	27.6	1.1e-14
TRINITY_DN14367_c1_g2	U3JEP6_FICAL/162-395	U3JEP6.1 PF00102.25;Y_phosphatase;	39.3	3.3e-21
TRINITY_DN14367_c1_g3	I1F4D5_AMPQE/2217-2454	I1F4D5.1 PF00102.25;Y_phosphatase;	55.2	5.8e-11
TRINITY_DN14369_c0_g1	I1G5T1_AMPQE/89-460	I1G5T1.1 PF01566.16;Nramp;	69.7	2.6e-143
TRINITY_DN14372_c0_g2	I1FN73_AMPQE/189-419	I1FN73.1 PF00561.18;Abhydrolase_1;	55.2	7.7e-71
TRINITY_DN14373_c1_g2	A7S085_NEMVE/5-190	A7S085.1 PF00227.24;Proteasome;	76.9	9.3e-81
TRINITY_DN14376_c3_g4	I1FHH5_AMPQE/185-360	I1FHH5.1 PF00092.26;VWA;	47.2	1.3e-32
TRINITY_DN14377_c0_g1	I1FUX6_AMPQE/327-479	I1FUX6.1 PF00620.25;RhoGAP;	69.4	8.5e-25
TRINITY_DN14379_c2_g1	I1GA06_AMPQE/60-272	I1GA06.1 PF08543.10;Phos_pyr_kin;	55.4	4.5e-40
TRINITY_DN14379_c2_g3	H2LQJ3_ORYLA/397-463	H2LQJ3.1 PF00412.20;LIM;	45.6	3.2e-12
TRINITY_DN14382_c0_g2	K1Q5N4_CRAGI/6-672	K1Q5N4.1 PF05622.10;HOOK;	29.8	1.3e-43
TRINITY_DN14382_c0_g3	I1FDE6_AMPQE/57-223	I1FDE6.1 PF05622.10;HOOK;	63	5.6e-08
TRINITY_DN14385_c1_g1	I1GJ73_AMPQE/4-301	I1GJ73.1 PF01044.17;Vinculin;	57.8	2.1e-82
TRINITY_DN14385_c1_g2	T1EDI8_HELRO/231-392	T1EDI8.1 PF04387.12;PTPLA;	49.4	9e-40
TRINITY_DN14385_c2_g3	R4G8M2_RHOPR/11-172	R4G8M2.1 PF00071.20;Ras;	32.4	8.6e-10
TRINITY_DN14385_c2_g4	I1FQQ7_AMPQE/1-231	I1FQQ7.1 PF04889.10;Cwf_Cwc_15;	70.5	3.3e-38
TRINITY_DN14385_c2_g5	G0VKK5_NAUCC/28-188	G0VKK5.1 PF00071.20;Ras;	51.4	1e-14
TRINITY_DN14387_c0_g1	I1FTE0_AMPQE/14-74	I1FTE0.1 PF00886.17;Ribosomal_S16;	73.8	4.8e-22
TRINITY_DN14388_c2_g4	A7RY04_NEMVE/7-234	A7RY04.1 PF01545.19;Cation_efflux;	68.2	4.2e-16
TRINITY_DN14389_c3_g1	C3ZMS1_BRAFL/3-399	C3ZMS1.1 PF01490.16;Aa_trans;	28.4	3e-29
TRINITY_DN14392_c0_g2	I1GE79_AMPQE/19-284	I1GE79.1 PF02089.13;Palm_thioest;	47.9	1.2e-83
TRINITY_DN14394_c0_g4	T1J5S9_STRMM/154-281	T1J5S9.1 PF06463.11;Mob_synth_C;	72.7	8.9e-51
TRINITY_DN14394_c0_g7	A0A0D2QXC4_GOSRA/53-198	A0A0D2QXC4.1 PF13353.4;Fer4_12;	87.8	3.9e-13
TRINITY_DN14396_c0_g2	C3YUT2_BRAFL/68-387	C3YUT2.1 PF00026.21;Asp;	61.7	2.5e-111
TRINITY_DN14396_c0_g3	V4A539_LOTGI/178-218	V4A539.1 PF01428.14;zf-AN1;	65.9	1.9e-11
TRINITY_DN14397_c0_g1	I1GBC5_AMPQE/146-179	I1GBC5.1 PF00515.26;TPR_1;	61.8	9.3e-07
TRINITY_DN14397_c2_g2	I1GBC4_AMPQE/6-375	I1GBC4.1 PF00022.17;Actin;	51.6	2.3e-104
TRINITY_DN14397_c2_g3	I1GHK6_AMPQE/140-211	I1GHK6.1 PF00250.16;Forkhead;	92.8	3.3e-33
TRINITY_DN14397_c2_g4	K1P6P8_CRAGI/120-438	K1P6P8.1 PF00282.17;Pyridoxal_deC;	59.1	1.8e-105
TRINITY_DN14397_c2_g9	I1FZZ3_AMPQE/52-342	I1FZZ3.1 PF00956.16;NAP;	48.6	1.8e-69
TRINITY_DN14398_c1_g1	I1FKG1_AMPQE/156-357	I1FKG1.1 PF00300.20;His_Phos_1;	64.6	5.8e-63
TRINITY_DN14400_c1_g6	E9FA25_METRA/161-334	E9FA25.2 PF03184.17;DDE_1;	53.2	2.3e-07
TRINITY_DN14402_c1_g2	A0A0P7VQZ2_9TELE/5-685	A0A0P7VQZ2.1 PF02463.17;SMC_N;	63.9	1.6e-126
TRINITY_DN14402_c2_g2	I1G1P9_AMPQE/2-1180	I1G1P9.1 PF02463.17;SMC_N;	63.6	5.1e-158
TRINITY_DN14405_c2_g4	I1GF10_AMPQE/63-480	I1GF10.1 PF00450.20;Peptidase_S10;	57.2	9.2e-138
TRINITY_DN14406_c0_g1	C3YSL3_BRAFL/195-372	C3YSL3.1 PF00617.17;RasGEF;	40.9	4.8e-37
TRINITY_DN14407_c0_g1	I3K3X9_ORENI/129-560	I3K3X9.1 PF00202.19;Aminotran_3;	53.1	5.4e-110
TRINITY_DN14407_c0_g2	F4P536_BATDJ/84-360	F4P536.1 PF00069.23;Pkinase;	40.5	5.8e-51
TRINITY_DN14408_c0_g1	I1FJU0_AMPQE/14-200	I1FJU0.1 PF03357.19;Snf7;	60.2	6.1e-33
TRINITY_DN14408_c0_g4	G1NLE3_MELGA/29-237	G1NLE3.1 PF13489.4;Methyltransf_23;	49.2	1.2e-44
TRINITY_DN14410_c0_g1	A4FUL9_DANRE/55-339	A4FUL9.1 PF10343.7;Q_salvage;	51.5	1.9e-09
TRINITY_DN14410_c0_g3	I1GFV9_AMPQE/2-279	I1GFV9.1 PF10343.7;Q_salvage;	52.4	5e-53
TRINITY_DN14411_c1_g1	A0A0N5ASR4_9BILA/30-143	A0A0N5ASR4.1 PF01398.19;JAB;	96.5	1.2e-57
TRINITY_DN14412_c1_g1	I1EPU8_AMPQE/70-140	I1EPU8.1 PF00076.20;RRM_1;	83.1	7.6e-27
TRINITY_DN14412_c1_g3	I1FVZ8_AMPQE/56-345	I1FVZ8.1 PF00128.22;Alpha-amylase;	73.8	4.3e-130
TRINITY_DN14412_c1_g4	J9K1D1_ACYPI/179-451	J9K1D1.2 PF00069.23;Pkinase;	52.7	1.5e-20
TRINITY_DN14413_c0_g2	I1FQH1_AMPQE/249-498	I1FQH1.1 PF07714.15;Pkinase_Tyr;	66.7	2.4e-60
TRINITY_DN14416_c0_g1	I1GCJ1_AMPQE/1844-1941	I1GCJ1.1 PF00028.15;Cadherin;	34.4	2.6e-08
TRINITY_DN14419_c0_g1	I1G9U4_AMPQE/85-288	I1G9U4.1 PF09992.7;NAGPA;	50	8e-40
TRINITY_DN14419_c1_g1	N6TV53_DENPD/113-583	N6TV53.1 PF06209.11;COBRA1;	40.2	6.5e-75
TRINITY_DN14419_c1_g4	C3YTM2_BRAFL/15-270	C3YTM2.1 PF02274.15;Amidinotransf;	46.4	1.5e-34
TRINITY_DN14419_c1_g6	B3RNY6_TRIAD/11-248	B3RNY6.1 PF02274.15;Amidinotransf;	51.4	2e-19
TRINITY_DN14420_c1_g7	K1R4I2_CRAGI/95-237	K1R4I2.1 PF01399.25;PCI;	60.4	4.9e-44
TRINITY_DN14422_c0_g1	I1GH07_AMPQE/71-148	I1GH07.1 PF04505.10;CD225;	41.1	3e-06
TRINITY_DN14424_c0_g1	V4ATG3_LOTGI/1399-1518	V4ATG3.1 PF00567.22;TUDOR;	34.4	1.6e-08
TRINITY_DN14426_c0_g1	I1FJC9_AMPQE/301-661	I1FJC9.1 PF03359.11;GKAP;	51.2	4.7e-27
TRINITY_DN14426_c0_g4	I1GDG3_AMPQE/100-210	I1GDG3.1 PF00452.17;Bcl-2;	50.8	6.8e-13
TRINITY_DN14427_c0_g2	B3RYB0_TRIAD/209-530	B3RYB0.1 PF00152.18;tRNA-synt_2;	76.7	2.3e-148
TRINITY_DN14427_c0_g4	W4YDC4_STRPU/46-464	W4YDC4.1 PF00654.18;Voltage_CLC;	44.2	3.8e-99
TRINITY_DN14427_c0_g5	H9GEA8_ANOCA/109-543	H9GEA8.2 PF00654.18;Voltage_CLC;	45.5	2.1e-66
TRINITY_DN14429_c2_g1	H0VKP3_CAVPO/50-482	H0VKP3.1 PF00266.17;Aminotran_5;	50.7	5e-101
TRINITY_DN14429_c2_g6	F0VL04_NEOCL/10-171	F0VL04.1 PF00071.20;Ras;	47.1	2.2e-23
TRINITY_DN14430_c2_g6	I1GBP2_AMPQE/10-74	I1GBP2.1 PF00808.21;CBFD_NFYB_HMF;	78.5	1.1e-20
TRINITY_DN14431_c1_g2	E2ANR9_CAMFO/316-368	E2ANR9.1 PF13833.4;EF-hand_8;	52	5.9e-09
TRINITY_DN14432_c0_g1	I1G2V5_AMPQE/58-217	I1G2V5.1 PF13091.4;PLDc_2;	50.6	1.6e-45
TRINITY_DN14433_c2_g12	I1FL76_AMPQE/216-429	I1FL76.1 PF12230.6;PRP21_like_P;	53.2	2.1e-45
TRINITY_DN14437_c0_g1	D2AR14_STRRD/51-488	D2AR14.1 PF01593.22;Amino_oxidase;	32.4	5.9e-37
TRINITY_DN14442_c0_g1	I1FNM8_AMPQE/16-362	I1FNM8.1 PF00225.21;Kinesin;	28	9.6e-21
TRINITY_DN14443_c0_g1	I1FV18_AMPQE/574-688	I1FV18.1 PF03351.15;DOMON;	43.9	2e-16
TRINITY_DN14444_c3_g4	I1FCP2_AMPQE/11-360	I1FCP2.1 PF01494.17;FAD_binding_3;	61.8	8.7e-117
TRINITY_DN14446_c1_g10	I1FMA0_AMPQE/242-308	I1FMA0.1 PF01485.19;IBR;	59.4	9.4e-19
TRINITY_DN14446_c1_g5	E9HHF5_DAPPU/209-394	E9HHF5.1 PF03184.17;DDE_1;	47.8	2.4e-50
TRINITY_DN14446_c1_g6	I1FMA0_AMPQE/242-308	I1FMA0.1 PF01485.19;IBR;	59.4	1.1e-18
TRINITY_DN14449_c0_g10	G0NTT2_CAEBE/191-324	G0NTT2.1 PF00004.27;AAA;	92.5	3.9e-63
TRINITY_DN14449_c0_g6	I1FJH6_AMPQE/12-169	I1FJH6.1 PF03357.19;Snf7;	76	7.2e-57
TRINITY_DN14449_c0_g8	I1FB02_AMPQE/6-105	I1FB02.1 PF00169.27;PH;	50	1.7e-23
TRINITY_DN14450_c0_g1	A0A0L0CQI4_LUCCU/166-290	A0A0L0CQI4.1 PF04641.10;Rtf2;	59.5	4.7e-34
TRINITY_DN14451_c1_g2	K1PSA1_CRAGI/347-836	K1PSA1.1 PF02990.14;EMP70;	60.5	3e-98
TRINITY_DN14451_c1_g7	W4Y7L9_STRPU/50-539	W4Y7L9.1 PF02990.14;EMP70;	78.5	3.6e-80
TRINITY_DN14452_c0_g1	I1EXH3_AMPQE/43-148	I1EXH3.1 PF15663.3;zf-CCCH_3;	50.7	2.5e-34
TRINITY_DN14453_c0_g1	I1G9S3_AMPQE/1461-1615	I1G9S3.1 PF08030.10;NAD_binding_6;	74.2	2.4e-67
TRINITY_DN14455_c0_g2	M2Y577_GALSU/8-80	M2Y577.1 PF00173.26;Cyt-b5;	63.4	1.7e-19
TRINITY_DN14455_c0_g5	I1G6W8_AMPQE/66-156	I1G6W8.1 PF03259.15;Robl_LC7;	78	1.6e-33
TRINITY_DN14456_c1_g1	C3ZY27_BRAFL/36-129	C3ZY27.1 PF00254.26;FKBP_C;	56.4	1.1e-23
TRINITY_DN14460_c0_g3	W5MKV1_LEPOC/229-287	W5MKV1.1 PF00076.20;RRM_1;	77.6	1.6e-19
TRINITY_DN14461_c0_g7	V4AVB5_LOTGI/41-200	V4AVB5.1 PF11721.6;Malectin;	58.8	8.4e-51
TRINITY_DN14461_c0_g8	C3ZV93_BRAFL/9-259	C3ZV93.1 PF00069.23;Pkinase;	82.1	2.7e-119
TRINITY_DN14463_c0_g1	C3YUH9_BRAFL/60-249	C3YUH9.1 PF03798.14;TRAM_LAG1_CLN8;	47.4	7.4e-44
TRINITY_DN14464_c0_g1	A7T279_NEMVE/129-207	A7T279.1 PF16837.3;SF3A3;	73.7	8.1e-27
TRINITY_DN14464_c1_g7	A0A090L8Y6_STRRB/482-834	A0A090L8Y6.1 PF00009.25;GTP_EFTU;	57.5	6.5e-110
TRINITY_DN14465_c0_g1	A6NHH0_HUMAN/57-174	A6NHH0.2 PF13410.4;GST_C_2;	46.2	3.5e-24
TRINITY_DN14465_c0_g6	I3JVT8_ORENI/115-455	I3JVT8.1 PF00282.17;Pyridoxal_deC;	58.7	1.8e-119
TRINITY_DN14467_c3_g2	H2Y4I3_CIOSA/26-621	H2Y4I3.1 PF04563.13;RNA_pol_Rpb2_1;	77.4	1.8e-285
TRINITY_DN14468_c0_g1	A0A0N5A7Q8_9BILA/6-160	A0A0N5A7Q8.1 PF14580.4;LRR_9;	52.6	2.3e-32
TRINITY_DN14469_c4_g1	T1JTB2_TETUR/238-563	T1JTB2.1 PF00676.18;E1_dh;	77.5	2e-118
TRINITY_DN14469_c4_g2	B7QLS5_IXOSC/66-330	B7QLS5.1 PF00069.23;Pkinase;	57.5	7.1e-86
TRINITY_DN14469_c4_g4	F1KSJ2_ASCSU/656-875	F1KSJ2.1 PF02779.22;Transket_pyr;	73.3	7.5e-06
TRINITY_DN14470_c2_g1	I1GHI1_AMPQE/1-244	I1GHI1.1 PF02121.16;IP_trans;	67.8	6.5e-101
TRINITY_DN14470_c4_g11	T1JDW5_STRMM/315-788	T1JDW5.1 PF10165.7;Ric8;	31.3	8.1e-46
TRINITY_DN14470_c4_g5	V3ZHY8_LOTGI/12-476	V3ZHY8.1 PF05783.9;DLIC;	44.4	1.1e-97
TRINITY_DN14471_c1_g2	I1GC49_AMPQE/19-525	I1GC49.1 PF04130.11;Spc97_Spc98;	53.6	7.1e-164
TRINITY_DN14472_c0_g1	I1FJM2_AMPQE/120-204	I1FJM2.1 PF06297.12;PET;	55.3	1e-18
TRINITY_DN14481_c1_g1	A5DGS8_PICGU/1165-1342	A5DGS8.2 PF00689.19;Cation_ATPase_C;	34.3	8.9e-15
TRINITY_DN14481_c1_g2	N1QLK6_SPHMS/1132-1311	N1QLK6.1 PF00689.19;Cation_ATPase_C;	32.8	5.4e-20
TRINITY_DN14483_c1_g2	D6WKD8_TRICA/687-723	D6WKD8.1 PF00057.16;Ldl_recept_a;	71	7.7e-06
TRINITY_DN14484_c0_g1	F2LKZ2_BURGS/80-340	F2LKZ2.1 PF00704.26;Glyco_hydro_18;	42.6	9.3e-50
TRINITY_DN14485_c0_g1	J9K582_ACYPI/132-446	J9K582.2 PF05185.14;PRMT5;	67.2	9.9e-121
TRINITY_DN14485_c1_g1	V4ACK7_LOTGI/203-250	V4ACK7.1 PF00400.30;WD40;	72.9	1.6e-15
TRINITY_DN14487_c2_g1	I1GIL9_AMPQE/572-866	I1GIL9.1 PF02171.15;Piwi;	71.5	6.1e-125
TRINITY_DN14488_c0_g3	W4XDB0_STRPU/52-230	W4XDB0.1 PF05076.11;SUFU;	65.9	5.7e-67
TRINITY_DN14489_c1_g1	I1FCW2_AMPQE/427-623	I1FCW2.1 PF00300.20;His_Phos_1;	67.2	3.3e-75
TRINITY_DN14489_c1_g2	I1FK31_AMPQE/7-143	I1FK31.1 PF01090.17;Ribosomal_S19e;	63.2	4.3e-47
TRINITY_DN14490_c0_g1	I1G784_AMPQE/1944-2205	I1G784.1 PF07714.15;Pkinase_Tyr;	55.8	2.6e-44
TRINITY_DN14490_c0_g6	H0ZT04_TAEGU/347-480	H0ZT04.1 PF13716.4;CRAL_TRIO_2;	52.3	2.3e-35
TRINITY_DN14492_c0_g4	B8A4M3_DANRE/10-125	B8A4M3.1 PF10639.7;TMEM234;	67.5	1.6e-23
TRINITY_DN14492_c1_g1	I1GG78_AMPQE/14-342	I1GG78.1 PF01326.17;PPDK_N;	49.4	2.4e-78
TRINITY_DN14494_c2_g2	A0A0E0NWB8_ORYRU/15-290	A0A0E0NWB8.1 PF01073.17;3Beta_HSD;	37.1	1.4e-25
TRINITY_DN14494_c2_g3	A0A0D2T6A5_GOSRA/46-177	A0A0D2T6A5.1 PF00125.22;Histone;	97	5.2e-62
TRINITY_DN14494_c2_g7	I1GGB3_AMPQE/85-318	I1GGB3.1 PF01073.17;3Beta_HSD;	45	5.3e-34
TRINITY_DN14494_c3_g3	I1GD13_AMPQE/46-172	I1GD13.1 PF00828.17;Ribosomal_L27A;	68.5	3.5e-46
TRINITY_DN14494_c3_g5	I1GD14_AMPQE/36-227	I1GD14.1 PF03299.12;TF_AP-2;	74.8	1.2e-60
TRINITY_DN14495_c0_g2	I1FZJ4_AMPQE/62-329	I1FZJ4.1 PF13324.4;GCIP;	37.2	2.9e-36
TRINITY_DN14495_c0_g5	F6YL99_CIOIN/16-134	F6YL99.1 PF14945.4;LLC1;	38.7	1.9e-16
TRINITY_DN14496_c0_g1	H0XZK9_OTOGA/9-149	H0XZK9.1 PF05351.9;GMP_PDE_delta;	79.9	2.5e-60
TRINITY_DN14496_c0_g2	I1FWC8_AMPQE/13-288	I1FWC8.1 PF00248.19;Aldo_ket_red;	64.6	3.2e-103
TRINITY_DN14496_c0_g3	I1GEW0_AMPQE/282-477	I1GEW0.1 PF13848.4;Thioredoxin_6;	50	3e-48
TRINITY_DN14496_c1_g1	V4A3Q9_LOTGI/64-489	V4A3Q9.1 PF13520.4;AA_permease_2;	42.7	1.7e-58
TRINITY_DN14497_c0_g1	C3Y4D8_BRAFL/142-226	C3Y4D8.1 PF00736.17;EF1_GNE;	77.4	4.9e-30
TRINITY_DN14497_c1_g2	I1G6P2_AMPQE/10-174	I1G6P2.1 PF03398.12;Ist1;	68	1.9e-42
TRINITY_DN14497_c2_g3	A0A0P7VTE7_9TELE/106-473	A0A0P7VTE7.1 PF05292.9;MCD;	49.9	2.1e-92
TRINITY_DN14497_c2_g9	I1G7A8_AMPQE/114-257	I1G7A8.1 PF06201.11;PITH;	58.3	5.2e-41
TRINITY_DN14500_c0_g1	K1PVT3_CRAGI/85-288	K1PVT3.1 PF01966.20;HD;	33.8	1.5e-15
TRINITY_DN14501_c0_g1	I1E8Q7_AMPQE/102-231	I1E8Q7.1 PF12130.6;DUF3585;	47.4	2.6e-21
TRINITY_DN14501_c0_g3	I1GIU3_AMPQE/12-90	I1GIU3.1 PF05008.13;V-SNARE;	69.6	2e-22
TRINITY_DN14501_c0_g8	I1GET3_AMPQE/34-205	I1GET3.1 PF03637.15;Mob1_phocein;	85.5	1.4e-86
TRINITY_DN14503_c4_g2	A7SBH6_NEMVE/588-701	A7SBH6.1 PF02204.16;VPS9;	37.6	1.7e-10
TRINITY_DN14505_c3_g1	B4Q8E6_DROSI/144-250	B4Q8E6.1 PF00651.29;BTB;	50.5	1.4e-23
TRINITY_DN14508_c0_g6	U3IAU6_ANAPL/40-497	U3IAU6.1 PF00067.20;p450;	38.2	2.6e-82
TRINITY_DN14509_c2_g1	A0A067QVS9_ZOONE/452-508	A0A067QVS9.1 PF16186.3;Arm_3;	58.6	1.6e-10
TRINITY_DN14509_c2_g3	G3I568_CRIGR/10-123	G3I568.1 PF01749.18;IBB;	36	1.5e-14
TRINITY_DN14509_c5_g1	T1G2M4_HELRO/239-417	T1G2M4.1 PF01853.16;MOZ_SAS;	72.8	1.7e-72
TRINITY_DN14510_c0_g1	C3ZG84_BRAFL/145-389	C3ZG84.1 PF00082.20;Peptidase_S8;	45.4	1.8e-53
TRINITY_DN14512_c0_g1	I1GI77_AMPQE/60-178	I1GI77.1 PF13832.4;zf-HC5HC2H_2;	75.6	2.5e-52
TRINITY_DN14512_c0_g2	I1GI78_AMPQE/440-498	I1GI78.1 PF00076.20;RRM_1;	78	1.4e-20
TRINITY_DN14513_c0_g1	W5K665_ASTMX/146-245	W5K665.1 PF02174.15;IRS;	31.9	3.1e-06
TRINITY_DN14514_c0_g1	DX39B_RAT/69-238	Q63413.3 PF00270.27;DEAD;	85.9	4.1e-80
TRINITY_DN14514_c0_g9	H2M2X3_ORYLA/257-627	H2M2X3.1 PF12309.6;KBP_C;	46.5	2.4e-08
TRINITY_DN14516_c0_g1	G3NWL1_GASAC/360-411	G3NWL1.1 PF00415.16;RCC1;	58.8	9e-11
TRINITY_DN14516_c0_g2	B3S0X4_TRIAD/89-141	B3S0X4.1 PF00415.16;RCC1;	71.2	6.4e-14
TRINITY_DN14516_c0_g3	I1F981_AMPQE/18-297	I1F981.1 PF00248.19;Aldo_ket_red;	63	9.7e-38
TRINITY_DN14517_c0_g1	I1GIX8_AMPQE/751-812	I1GIX8.1 PF07647.15;SAM_2;	51.6	1.2e-09
TRINITY_DN14517_c0_g4	I1FMS4_AMPQE/123-705	I1FMS4.1 PF06419.9;COG6;	39.7	9.6e-76
TRINITY_DN14517_c0_g6	A7SZM3_NEMVE/35-452	A7SZM3.1 PF06419.9;COG6;	54.7	1.4e-27
TRINITY_DN14519_c0_g5	A7SSG7_NEMVE/145-550	A7SSG7.1 PF00654.18;Voltage_CLC;	61.9	2.6e-134
TRINITY_DN14522_c1_g1	I1FGA0_AMPQE/250-305	I1FGA0.1 PF00412.20;LIM;	62.5	2.2e-08
TRINITY_DN14522_c1_g2	I1FGA0_AMPQE/250-305	I1FGA0.1 PF00412.20;LIM;	51.8	3.7e-12
TRINITY_DN14523_c0_g1	I1GE54_AMPQE/15-180	I1GE54.1 PF00270.27;DEAD;	48.8	2.7e-34
TRINITY_DN14524_c1_g1	G3R939_GORGO/322-668	G3R939.1 PF00995.21;Sec1;	35.4	1.7e-31
TRINITY_DN14524_c1_g10	T0MH03_9CETA/202-625	T0MH03.1 PF00856.26;SET;	51.6	5.2e-10
TRINITY_DN14524_c1_g2	A0A0D2X3E9_CAPO3/411-507	A0A0D2X3E9.1 PF00169.27;PH;	40.6	4.9e-12
TRINITY_DN14524_c1_g3	A7AV83_BABBO/4-121	A7AV83.1 PF01412.16;ArfGap;	57.8	4.3e-25
TRINITY_DN14524_c1_g8	T0MH03_9CETA/202-625	T0MH03.1 PF00856.26;SET;	44.6	3e-60
TRINITY_DN14526_c7_g1	A7RV00_NEMVE/11-153	A7RV00.1 PF04652.14;Vta1;	51.8	4e-35
TRINITY_DN14528_c0_g1	F6YIL9_CIOIN/1-432	F6YIL9.2 PF00996.16;GDI;	48.1	3.8e-103
TRINITY_DN14529_c0_g1	I1G9F8_AMPQE/506-582	I1G9F8.1 PF00498.24;FHA;	83.1	1.4e-30
TRINITY_DN14530_c3_g1	A7TCG6_NEMVE/1-152	A7TCG6.1 PF15489.4;CTC1;	41.7	1.3e-12
TRINITY_DN14530_c3_g2	B7PCL8_IXOSC/70-267	B7PCL8.1 PF00106.23;adh_short;	39.7	5.8e-27
TRINITY_DN14532_c0_g2	T0RYI8_9STRA/278-371	T0RYI8.1 PF12796.5;Ank_2;	43.6	3.7e-06
TRINITY_DN14533_c0_g2	K7IPT8_NASVI/54-186	K7IPT8.1 PF00782.18;DSPc;	53.4	3.1e-23
TRINITY_DN14533_c0_g9	C3Z6D8_BRAFL/75-143	C3Z6D8.1 PF00076.20;RRM_1;	70.6	1.2e-20
TRINITY_DN14533_c1_g1	I1F1V0_AMPQE/723-841	I1F1V0.1 PF08477.11;Roc;	35.6	2.7e-16
TRINITY_DN14535_c2_g2	I3LT88_PIG/421-627	I3LT88.1 PF00702.24;Hydrolase;	59.2	1.8e-45
TRINITY_DN14536_c1_g1	I1G2U5_AMPQE/5-144	I1G2U5.1 PF08939.8;DUF1917;	45.6	7.6e-16
TRINITY_DN14536_c1_g2	Q1IP99_KORVE/226-651	Q1IP99.1 PF13598.4;DUF4139;	23.8	4.4e-21
TRINITY_DN14536_c1_g6	I1F875_AMPQE/4-136	I1F875.1 PF02966.14;DIM1;	90.2	8.6e-70
TRINITY_DN14537_c1_g5	I1FX11_AMPQE/444-645	I1FX11.1 PF00270.27;DEAD;	83.7	3.3e-92
TRINITY_DN14537_c1_g7	I1FLA6_AMPQE/89-277	I1FLA6.1 PF00535.24;Glycos_transf_2;	69.8	5.3e-72
TRINITY_DN14538_c0_g1	W4Y8P2_STRPU/167-324	W4Y8P2.1 PF00078.25;RVT_1;	61.3	1.6e-30
TRINITY_DN14539_c1_g1	T1IQ34_STRMM/22-421	T1IQ34.1 PF06602.12;Myotub-related;	45.9	2.2e-95
TRINITY_DN14542_c1_g1	I1FML1_AMPQE/304-525	I1FML1.1 PF16692.3;Folliculin_C;	50.9	1.5e-56
TRINITY_DN14542_c1_g2	V4CIC0_LOTGI/152-335	V4CIC0.1 PF02854.17;MIF4G;	79.3	8.7e-79
TRINITY_DN14543_c0_g1	I1GBL8_AMPQE/4280-4434	I1GBL8.1 PF00179.24;UQ_con;	67.3	1.3e-30
TRINITY_DN14544_c2_g3	I1FWQ3_AMPQE/145-350	I1FWQ3.1 PF08941.8;USP8_interact;	69.7	1.1e-44
TRINITY_DN14544_c2_g7	W5KVL8_ASTMX/42-161	W5KVL8.1 PF01641.16;SelR;	66.7	2.6e-40
TRINITY_DN14546_c2_g2	B3RZU7_TRIAD/567-770	B3RZU7.1 PF01431.19;Peptidase_M13;	49.5	1e-52
TRINITY_DN14549_c1_g1	K7IDI6_CAEJA/271-482	K7IDI6.1 PF02862.15;DDHD;	38.1	1.4e-18
TRINITY_DN14550_c2_g2	L5KPS1_PTEAL/10-147	L5KPS1.1 PF00071.20;Ras;	78.1	1.4e-50
TRINITY_DN14550_c2_g4	C3ZXR7_BRAFL/363-633	C3ZXR7.1 PF05843.12;Suf;	55.8	1.6e-77
TRINITY_DN14553_c0_g1	K6UYC1_9APIC/13-175	K6UYC1.1 PF00071.20;Ras;	55.8	1.2e-46
TRINITY_DN14554_c0_g1	I1FXD5_AMPQE/290-453	I1FXD5.1 PF13489.4;Methyltransf_23;	25.8	1.3e-11
TRINITY_DN14555_c0_g1	I1EH78_AMPQE/9-241	I1EH78.1 PF04548.14;AIG1;	37.5	1.8e-36
TRINITY_DN14555_c0_g2	I1EH78_AMPQE/9-241	I1EH78.1 PF04548.14;AIG1;	41.5	1.9e-22
TRINITY_DN14557_c1_g3	T1EPC4_HELRO/122-198	T1EPC4.1 PF00025.19;Arf;	64.4	4.4e-14
TRINITY_DN14557_c2_g3	I1G436_AMPQE/280-382	I1G436.1 PF03126.16;Plus-3;	69.9	2.1e-38
TRINITY_DN14558_c1_g2	A7SYL2_NEMVE/219-281	A7SYL2.1 PF13432.4;TPR_16;	57.1	1.2e-12
TRINITY_DN14559_c0_g1	I1EPR8_AMPQE/1-448	I1EPR8.1 PF01130.19;CD36;	36.1	1.2e-77
TRINITY_DN14559_c0_g3	I1FWT7_AMPQE/13-138	I1FWT7.1 PF00153.25;Mito_carr;	59.1	1.8e-34
TRINITY_DN14560_c0_g4	D7FW97_ECTSI/184-665	D7FW97.1 PF04547.10;Anoctamin;	34.9	1.4e-69
TRINITY_DN14561_c0_g1	H3B3B8_LATCH/245-472	H3B3B8.1 PF04577.12;DUF563;	60.8	4.2e-75
TRINITY_DN14562_c3_g3	V8NVF6_OPHHA/224-350	V8NVF6.1 PF00293.26;NUDIX;	60.7	1.4e-11
TRINITY_DN14563_c1_g1	C3Y8R7_BRAFL/23-254	C3Y8R7.1 PF00089.24;Trypsin;	41.9	3.7e-43
TRINITY_DN14563_c2_g1	I1FE42_AMPQE/235-404	I1FE42.1 PF00566.16;RabGAP-TBC;	58.6	1.1e-48
TRINITY_DN14563_c2_g3	A0A087SBA5_AUXPR/11-172	A0A087SBA5.1 PF00071.20;Ras;	47.3	1.2e-36
TRINITY_DN14565_c3_g1	I1GIV4_AMPQE/12-369	I1GIV4.1 PF00069.23;Pkinase;	53.1	3.8e-111
TRINITY_DN14565_c3_g3	R4X8K9_TAPDE/13-174	R4X8K9.1 PF00071.20;Ras;	50.3	1.5e-43
TRINITY_DN14567_c4_g4	A0A085NA79_9BILA/211-337	A0A085NA79.1 PF09668.8;Asp_protease;	39.8	3.3e-10
TRINITY_DN14568_c0_g1	K2QJJ6_9RHIZ/6-263	K2QJJ6.1 PF00108.21;Thiolase_N;	65.9	3.4e-69
TRINITY_DN14569_c0_g1	I1FBP8_AMPQE/171-417	I1FBP8.1 PF13621.4;Cupin_8;	58.1	1.4e-86
TRINITY_DN14570_c0_g1	A7RYE3_NEMVE/14-115	A7RYE3.1 PF00168.28;C2;	52.4	1e-17
TRINITY_DN14573_c1_g2	A7SWU2_NEMVE/144-393	A7SWU2.1 PF00378.18;ECH_1;	58.1	7.5e-80
TRINITY_DN14573_c2_g7	I1ESG9_AMPQE/101-209	I1ESG9.1 PF00078.25;RVT_1;	48.4	1.2e-09
TRINITY_DN14574_c4_g1	I1FP41_AMPQE/285-363	I1FP41.1 PF00595.22;PDZ;	73.4	3.5e-24
TRINITY_DN14574_c4_g3	G1KSN3_ANOCA/20-146	G1KSN3.1 PF02221.13;E1_DerP2_DerF2;	42.7	5.2e-22
TRINITY_DN14574_c4_g4	B7P6R0_IXOSC/783-958	B7P6R0.1 PF01426.16;BAH;	41.1	4.4e-24
TRINITY_DN14575_c1_g5	V3YXL6_LOTGI/59-267	V3YXL6.1 PF10261.7;Scs3p;	47.5	1.4e-13
TRINITY_DN14576_c1_g1	KIFA3_STRPU/13-720	Q26626.1 PF05804.10;KAP;	53.7	1.2e-114
TRINITY_DN14577_c0_g10	E9FUS3_DAPPU/87-215	E9FUS3.1 PF12146.6;Hydrolase_4;	76.4	8.5e-54
TRINITY_DN14577_c0_g3	F7AX64_CALJA/58-219	F7AX64.1 PF00071.20;Ras;	89.7	6.8e-48
TRINITY_DN14577_c0_g4	I1GH15_AMPQE/149-196	I1GH15.1 PF00646.31;F-box;	70.8	5.3e-12
TRINITY_DN14578_c1_g1	I1FPL4_AMPQE/74-336	I1FPL4.1 PF00069.23;Pkinase;	76.4	7.7e-115
TRINITY_DN14578_c1_g3	I1F906_AMPQE/233-388	I1F906.1 PF00179.24;UQ_con;	77.6	8.2e-68
TRINITY_DN14578_c1_g5	H2LZ89_ORYLA/155-438	H2LZ89.1 PF00082.20;Peptidase_S8;	60.6	5.6e-99
TRINITY_DN14581_c0_g1	G8AI59_AZOBR/53-176	G8AI59.1 PF01124.16;MAPEG;	33.1	1.4e-07
TRINITY_DN14583_c1_g1	A7S370_NEMVE/157-429	A7S370.1 PF00928.19;Adap_comp_sub;	73.4	1.2e-118
TRINITY_DN14583_c1_g6	I1FGQ2_AMPQE/364-402	I1FGQ2.1 PF00400.30;WD40;	97.4	5.9e-15
TRINITY_DN14585_c3_g2	A0A044V7N3_ONCVO/246-398	A0A044V7N3.1 PF00160.19;Pro_isomerase;	77	1.3e-24
TRINITY_DN14585_c3_g3	A0A072V956_MEDTR/297-460	A0A072V956.1 PF08662.9;eIF2A;	53.8	1.4e-46
TRINITY_DN14586_c1_g1	C3YP09_BRAFL/2150-2247	C3YP09.1 PF00530.16;SRCR;	55.9	3.2e-23
TRINITY_DN14587_c3_g1	I1G6W1_AMPQE/552-737	I1G6W1.1 PF00104.28;Hormone_recep;	72.6	1.4e-65
TRINITY_DN14589_c0_g2	G1K8Y1_ANOCA/38-131	G1K8Y1.1 PF00254.26;FKBP_C;	38.3	2.8e-14
TRINITY_DN14591_c0_g1	I1G4R2_AMPQE/1224-1386	I1G4R2.1 PF00406.20;ADK;	62.7	1.3e-42
TRINITY_DN14592_c0_g1	A7T0Y6_NEMVE/7-72	A7T0Y6.1 PF00653.19;BIR;	50	5.8e-13
TRINITY_DN14593_c2_g1	I1G9E6_AMPQE/646-827	I1G9E6.1 PF12063.6;DUF3543;	35.3	4e-17
TRINITY_DN14593_c3_g2	I1EXH4_AMPQE/14-441	I1EXH4.1 PF03153.11;TFIIA;	68.6	2e-13
TRINITY_DN14593_c3_g4	B7PHA0_IXOSC/285-388	B7PHA0.1 PF00085.18;Thioredoxin;	55.1	2.3e-26
TRINITY_DN14597_c4_g1	A7T106_NEMVE/7-254	A7T106.1 PF04641.10;Rtf2;	62.3	3e-79
TRINITY_DN14599_c2_g8	I1GE18_AMPQE/3-266	I1GE18.1 PF05462.9;Dicty_CAR;	27.6	1.1e-11
TRINITY_DN14600_c3_g1	V4AD92_LOTGI/24-140	V4AD92.1 PF00307.29;CH;	53.5	1.9e-26
TRINITY_DN14600_c3_g5	DCTN4_PONAB/137-375	Q5R7U7.1 PF05502.11;Dynactin_p62;	34.5	9.7e-28
TRINITY_DN14601_c0_g1	A0A0P7ULC1_9TELE/547-629	A0A0P7ULC1.1 PF12796.5;Ank_2;	48.5	8.5e-07
TRINITY_DN14602_c0_g2	B4NK15_DROWI/27-164	B4NK15.1 PF01562.17;Pep_M12B_propep;	34.8	4e-17
TRINITY_DN14602_c1_g3	H3ASV2_LATCH/393-909	H3ASV2.1 PF00328.20;His_Phos_2;	55.6	4.4e-33
TRINITY_DN14602_c1_g4	I1FSV6_AMPQE/304-495	I1FSV6.1 PF01852.17;START;	44.1	2.8e-41
TRINITY_DN14603_c2_g2	E2BCV0_HARSA/63-172	E2BCV0.1 PF07992.12;Pyr_redox_2;	59.3	3.6e-29
TRINITY_DN14603_c3_g1	G3NDT6_GASAC/140-474	G3NDT6.1 PF02010.13;REJ;	32.1	1.5e-32
TRINITY_DN14604_c1_g8	E2BF51_HARSA/33-259	E2BF51.1 PF14291.4;DUF4371;	44	4.7e-12
TRINITY_DN14605_c1_g1	L1I5Q1_GUITH/48-197	L1I5Q1.1 PF13173.4;AAA_14;	33.1	2.9e-16
TRINITY_DN14606_c0_g1	T1IUZ6_STRMM/320-522	T1IUZ6.1 PF13574.4;Reprolysin_2;	52.5	8.7e-22
TRINITY_DN14608_c4_g1	U4U068_DENPD/85-174	U4U068.1 PF15409.4;PH_8;	43.7	3.5e-10
TRINITY_DN14608_c5_g1	T1G2I4_HELRO/43-432	T1G2I4.1 PF01603.18;B56;	57.5	1.1e-153
TRINITY_DN14610_c3_g1	K1QGQ4_CRAGI/48-178	K1QGQ4.1 PF00156.25;Pribosyltran;	57.3	4.5e-36
TRINITY_DN14610_c3_g2	I3IZP1_ORENI/106-290	I3IZP1.1 PF01255.17;Prenyltransf;	37.7	2.2e-27
TRINITY_DN14610_c3_g3	V3ZKD1_LOTGI/250-464	V3ZKD1.1 PF00215.22;OMPdecase;	58.3	3.9e-25
TRINITY_DN14610_c4_g2	I1G130_AMPQE/52-393	I1G130.1 PF00180.18;Iso_dh;	75.7	4.6e-124
TRINITY_DN14611_c1_g3	I1FLH8_AMPQE/13-310	I1FLH8.1 PF05462.9;Dicty_CAR;	39.5	3.6e-47
TRINITY_DN14611_c1_g7	B3RYG2_TRIAD/121-452	B3RYG2.1 PF00176.21;SNF2_N;	47.9	5.1e-13
TRINITY_DN14612_c1_g1	I1FYI7_AMPQE/28-715	I1FYI7.1 PF05470.10;eIF-3c_N;	56.6	5e-130
TRINITY_DN14612_c1_g4	I1FYI7_AMPQE/28-715	I1FYI7.1 PF05470.10;eIF-3c_N;	51	1.2e-17
TRINITY_DN14614_c0_g1	A0A0D2VWJ9_CAPO3/152-241	A0A0D2VWJ9.1 PF06736.9;DUF1211;	48.4	1.2e-15
TRINITY_DN14615_c0_g1	I1FA46_AMPQE/498-889	I1FA46.1 PF08393.11;DHC_N2;	76.3	5.7e-120
TRINITY_DN14617_c0_g1	D2V5F0_NAEGR/143-242	D2V5F0.1 PF13640.4;2OG-FeII_Oxy_3;	42.6	2.4e-18
TRINITY_DN14619_c0_g1	U3IX24_ANAPL/115-452	U3IX24.1 PF07992.12;Pyr_redox_2;	66	1.3e-125
TRINITY_DN14619_c0_g6	H2U398_TAKRU/192-714	H2U398.1 PF00183.16;HSP90;	78.1	1.5e-214
TRINITY_DN14623_c3_g1	K1RFK2_CRAGI/533-757	K1RFK2.1 PF13718.4;GNAT_acetyltr_2;	69.4	3.2e-85
TRINITY_DN14623_c4_g1	W4YI49_STRPU/455-547	W4YI49.1 PF16367.3;RRM_7;	67.7	3.4e-33
TRINITY_DN14623_c4_g5	I1GJL4_AMPQE/76-153	I1GJL4.1 PF03134.17;TB2_DP1_HVA22;	78.2	8.5e-32
TRINITY_DN14624_c0_g2	SRRT_DROAN/751-921	B3MJ69.1 PF04959.11;ARS2;	51.7	7e-24
TRINITY_DN14625_c3_g2	I1G7I3_AMPQE/20-320	I1G7I3.1 PF03151.14;TPT;	62.3	5.1e-99
TRINITY_DN14627_c1_g6	I1GFS6_AMPQE/19-94	I1GFS6.1 PF13417.4;GST_N_3;	52.3	1.8e-12
TRINITY_DN14629_c1_g1	W5JB18_ANODA/36-294	W5JB18.1 PF01545.19;Cation_efflux;	70.6	1.9e-56
TRINITY_DN14629_c1_g10	F6U8A6_XENTR/11-328	F6U8A6.1 PF10239.7;DUF2465;	40	1.6e-52
TRINITY_DN14631_c0_g1	J9L9X3_ACYPI/16-269	J9L9X3.2 PF00069.23;Pkinase;	55.3	1.2e-50
TRINITY_DN14631_c0_g10	V4AGI2_LOTGI/69-279	V4AGI2.1 PF00856.26;SET;	48.3	2.2e-54
TRINITY_DN14631_c0_g14	A0A0N8K0U3_9TELE/432-810	A0A0N8K0U3.1 PF00443.27;UCH;	56.2	2.5e-33
TRINITY_DN14631_c0_g2	A7SSQ9_NEMVE/15-96	A7SSQ9.1 PF05046.12;Img2;	48.2	1.3e-14
TRINITY_DN14631_c0_g7	I1G5N5_AMPQE/98-204	I1G5N5.1 PF00373.16;FERM_M;	56.4	2.8e-19
TRINITY_DN14631_c0_g8	U3KMP5_RABIT/428-787	U3KMP5.1 PF00443.27;UCH;	43	6.5e-48
TRINITY_DN14632_c0_g4	F1S9J9_PIG/767-1367	F1S9J9.1 PF14656.4;RAB3GAP2_C;	21.9	1.6e-08
TRINITY_DN14633_c1_g1	I1FIJ8_AMPQE/143-503	I1FIJ8.1 PF01490.16;Aa_trans;	49.9	1.5e-86
TRINITY_DN14633_c1_g2	V4ACW1_LOTGI/14-132	V4ACW1.1 PF01575.17;MaoC_dehydratas;	45.9	1.2e-20
TRINITY_DN14635_c3_g4	I1FJL8_AMPQE/18-114	I1FJL8.1 PF00169.27;PH;	57.7	2.5e-27
TRINITY_DN14636_c0_g1	DPP3_NEMVE/150-709	A7RZW4.1 PF03571.13;Peptidase_M49;	61.7	8.8e-196
TRINITY_DN14637_c1_g1	W4Y1L4_STRPU/746-902	W4Y1L4.1 PF01529.18;zf-DHHC;	34.1	5e-09
TRINITY_DN14637_c3_g3	I1FDW4_AMPQE/5-142	I1FDW4.1 PF00578.19;AhpC-TSA;	70.1	6e-56
TRINITY_DN14638_c0_g2	I1G3F4_AMPQE/2-83	I1G3F4.1 PF00564.22;PB1;	39	6e-06
TRINITY_DN14638_c0_g4	I1F9L2_AMPQE/8-144	I1F9L2.1 PF01242.17;PTPS;	57.7	3.7e-43
TRINITY_DN14638_c0_g5	I1G3F2_AMPQE/2-83	I1G3F2.1 PF00564.22;PB1;	37.5	3.2e-07
TRINITY_DN14638_c0_g9	I1G3F2_AMPQE/2-83	I1G3F2.1 PF00564.22;PB1;	43.1	1.6e-07
TRINITY_DN14639_c0_g3	I1EY01_AMPQE/22-136	I1EY01.1 PF00665.24;rve;	60.6	1.7e-15
TRINITY_DN14639_c0_g8	H2V578_TAKRU/3-77	H2V578.1 PF00665.24;rve;	57.9	2.4e-09
TRINITY_DN14641_c0_g1	I1GCC2_AMPQE/51-211	I1GCC2.1 PF00156.25;Pribosyltran;	66.7	9.5e-57
TRINITY_DN14642_c0_g1	I1GDW7_AMPQE/447-723	I1GDW7.1 PF00664.21;ABC_membrane;	42.5	5.8e-58
TRINITY_DN14644_c0_g3	I1GBB0_AMPQE/456-602	I1GBB0.1 PF02338.17;OTU;	70.7	4.1e-57
TRINITY_DN14644_c0_g4	A0A0C4EUJ2_PUCT1/180-352	A0A0C4EUJ2.1 PF08443.9;RimK;	53	9.4e-20
TRINITY_DN14644_c0_g5	G0WD57_NAUDC/962-1293	G0WD57.1 PF02463.17;SMC_N;	51.2	4.4e-56
TRINITY_DN14645_c0_g1	T1J3R7_STRMM/648-718	T1J3R7.1 PF00076.20;RRM_1;	52.1	5e-09
TRINITY_DN14646_c1_g2	W5KQI7_ASTMX/3-298	W5KQI7.1 PF01112.16;Asparaginase_2;	67.3	9e-13
TRINITY_DN14646_c4_g2	B7P0R7_IXOSC/285-331	B7P0R7.1 PF00628.27;PHD;	57.4	8.3e-12
TRINITY_DN14646_c4_g6	B3S8J7_TRIAD/154-281	B3S8J7.1 PF14833.4;NAD_binding_11;	73.4	7.7e-51
TRINITY_DN14647_c0_g1	Q16UA7_AEDAE/20-487	Q16UA7.1 PF04791.14;LMBR1;	40.1	3.6e-71
TRINITY_DN14647_c1_g1	A7S143_NEMVE/16-393	A7S143.1 PF01053.18;Cys_Met_Meta_PP;	62.9	4.7e-136
TRINITY_DN14650_c1_g1	I1GDI7_AMPQE/99-386	I1GDI7.1 PF00069.23;Pkinase;	67.3	9.6e-118
TRINITY_DN14650_c1_g2	I1FYF9_AMPQE/64-341	I1FYF9.1 PF02089.13;Palm_thioest;	51.6	1.5e-30
TRINITY_DN14653_c2_g1	B7PLW8_IXOSC/11-330	B7PLW8.1 PF13621.4;Cupin_8;	62.2	8.6e-49
TRINITY_DN14653_c2_g2	W5NCK6_LEPOC/200-398	W5NCK6.1 PF00006.23;ATP-synt_ab;	99.2	6.4e-69
TRINITY_DN14654_c1_g1	C3ZNN3_BRAFL/127-162	C3ZNN3.1 PF14670.4;FXa_inhibition;	63.9	2.5e-06
TRINITY_DN14654_c2_g1	I1G936_AMPQE/255-514	I1G936.1 PF00069.23;Pkinase;	39.7	1.7e-51
TRINITY_DN14654_c2_g2	B3RIQ7_TRIAD/50-112	B3RIQ7.1 PF00137.19;ATP-synt_C;	88.9	2.3e-22
TRINITY_DN14655_c2_g1	I1FXQ6_AMPQE/592-893	I1FXQ6.1 PF02171.15;Piwi;	87.7	5e-157
TRINITY_DN14657_c0_g1	A7RUT3_NEMVE/252-401	A7RUT3.1 PF00271.29;Helicase_C;	65.1	2.7e-51
TRINITY_DN14660_c1_g4	A7T0J8_NEMVE/9-147	A7T0J8.1 PF00334.17;NDK;	58.7	1.9e-42
TRINITY_DN14660_c1_g5	I1FEZ1_AMPQE/193-383	I1FEZ1.1 PF01545.19;Cation_efflux;	60.2	2e-33
TRINITY_DN14660_c1_g7	H2VAE1_TAKRU/12-319	H2VAE1.1 PF01556.16;DnaJ_C;	39.9	9.7e-45
TRINITY_DN14661_c1_g1	I1G5Q6_AMPQE/625-891	I1G5Q6.1 PF00557.22;Peptidase_M24;	70	8.4e-113
TRINITY_DN14661_c1_g10	I1G052_AMPQE/6-224	I1G052.1 PF11265.6;Med25_VWA;	41.2	5.8e-37
TRINITY_DN14661_c1_g3	A0A0G2KZA4_DANRE/198-462	A0A0G2KZA4.1 PF00557.22;Peptidase_M24;	81.1	3.2e-11
TRINITY_DN14662_c0_g1	W4Y1I0_STRPU/34-95	W4Y1I0.1 PF05605.10;zf-Di19;	39	1.1e-09
TRINITY_DN14663_c2_g1	K1RK33_CRAGI/705-1025	K1RK33.1 PF08767.9;CRM1_C;	63.7	4.5e-114
TRINITY_DN14663_c2_g5	E4WVA2_OIKDI/49-223	E4WVA2.1 PF10607.7;CLTH;	35.2	2.8e-22
TRINITY_DN14663_c2_g6	I1FZL2_AMPQE/34-160	I1FZL2.1 PF02221.13;E1_DerP2_DerF2;	28.1	1.3e-06
TRINITY_DN14664_c2_g2	W5LLY2_ASTMX/56-532	W5LLY2.1 PF13000.5;Acatn;	58.5	5.3e-134
TRINITY_DN14666_c0_g1	I1FGG4_AMPQE/277-502	I1FGG4.1 PF14075.4;UBN_AB;	36.4	7.4e-32
TRINITY_DN14666_c0_g4	T1IP45_STRMM/22-271	T1IP45.1 PF00481.19;PP2C;	65.6	8.1e-30
TRINITY_DN14667_c0_g1	V4AF14_LOTGI/15-124	V4AF14.1 PF02893.18;GRAM;	57.3	1.9e-23
TRINITY_DN14667_c2_g1	Q803B0_DANRE/47-550	Q803B0.1 PF00118.22;Cpn60_TCP1;	70.9	4e-204
TRINITY_DN14673_c0_g1	C1E3J2_MICSR/113-370	C1E3J2.1 PF07714.15;Pkinase_Tyr;	33.8	8.7e-30
TRINITY_DN14679_c1_g1	I1GEJ1_AMPQE/130-179	I1GEJ1.1 PF00010.24;HLH;	92	4.4e-16
TRINITY_DN14679_c2_g4	I1M396_SOYBN/28-74	I1M396.1 PF00304.18;Gamma-thionin;	61.7	1.7e-13
TRINITY_DN14681_c0_g1	I1ET63_AMPQE/63-147	I1ET63.1 PF08743.8;Nse4_C;	51.2	6.5e-17
TRINITY_DN14681_c0_g2	I1GF37_AMPQE/86-822	I1GF37.1 PF00443.27;UCH;	36.7	1.5e-127
TRINITY_DN14684_c2_g1	G3W651_SARHA/44-280	G3W651.1 PF00656.20;Peptidase_C14;	31.8	3.2e-12
TRINITY_DN14685_c0_g1	I1GE13_AMPQE/4454-4493	I1GE13.1 PF07645.13;EGF_CA;	65	3.9e-08
TRINITY_DN14685_c0_g2	I1FEY2_AMPQE/303-341	I1FEY2.1 PF07645.13;EGF_CA;	70.6	2.2e-06
TRINITY_DN14692_c0_g1	H0VG03_CAVPO/62-401	H0VG03.1 PF01979.18;Amidohydro_1;	55.7	2.3e-99
TRINITY_DN14693_c1_g3	I1G6S9_AMPQE/20-256	I1G6S9.1 PF01193.22;RNA_pol_L;	72.7	2.2e-71
TRINITY_DN14693_c3_g1	A0A0Q9XH36_DROMO/37-219	A0A0Q9XH36.1 PF00117.26;GATase;	62.6	7.5e-59
TRINITY_DN14694_c0_g1	B3S1K5_TRIAD/178-303	B3S1K5.1 PF09335.9;SNARE_assoc;	73	1.9e-48
TRINITY_DN14694_c1_g3	W4YXK7_STRPU/115-373	W4YXK7.1 PF00566.16;RabGAP-TBC;	49.6	1.6e-56
TRINITY_DN14694_c1_g4	I1FIZ3_AMPQE/19-114	I1FIZ3.1 PF00153.25;Mito_carr;	84	1.8e-39
TRINITY_DN14695_c2_g1	I1FA95_AMPQE/38-138	I1FA95.1 PF00447.15;HSF_DNA-bind;	66.7	2e-31
TRINITY_DN14697_c4_g1	G3MY32_BOVIN/23-217	G3MY32.1 PF02366.16;PMT;	35.6	5.5e-27
TRINITY_DN14697_c5_g1	A7RR36_NEMVE/27-282	A7RR36.1 PF04086.11;SRP-alpha_N;	59.5	1.8e-29
TRINITY_DN14697_c5_g2	I1FV92_AMPQE/300-521	I1FV92.1 PF00448.20;SRP54;	81.5	4e-98
TRINITY_DN14700_c0_g7	I1F5L5_AMPQE/51-173	I1F5L5.1 PF01347.20;Vitellogenin_N;	40	8.7e-12
TRINITY_DN14703_c0_g4	I1FI58_AMPQE/22-257	I1FI58.1 PF00262.16;Calreticulin;	78.4	2.7e-46
TRINITY_DN14705_c0_g3	I1G3W1_AMPQE/477-656	I1G3W1.1 PF01734.20;Patatin;	43.1	9e-32
TRINITY_DN14705_c0_g4	T1KDH7_TETUR/50-90	T1KDH7.1 PF03911.14;Sec61_beta;	78.6	2.7e-11
TRINITY_DN14706_c1_g1	H3ADU3_LATCH/9-149	H3ADU3.1 PF04603.10;Mog1;	49.7	6.6e-31
TRINITY_DN14706_c1_g2	I1GDS1_AMPQE/684-944	I1GDS1.1 PF00233.17;PDEase_I;	71.6	1.3e-104
TRINITY_DN14706_c1_g4	T1J0V6_STRMM/27-204	T1J0V6.1 PF10248.7;Mlf1IP;	45.3	3.7e-23
TRINITY_DN14706_c1_g5	Q5M8K1_XENTR/24-192	Q5M8K1.1 PF00071.20;Ras;	37.5	4.1e-34
TRINITY_DN14707_c0_g1	I1FCZ9_AMPQE/7-68	I1FCZ9.1 PF07647.15;SAM_2;	50	2.4e-07
TRINITY_DN14707_c0_g10	PK1IP_DANRE/175-262	Q6TNS2.1 PF12894.5;ANAPC4_WD40;	35.4	3.4e-10
TRINITY_DN14709_c0_g1	I1FUV3_AMPQE/1103-1339	I1FUV3.1 PF00102.25;Y_phosphatase;	50.5	1.3e-55
TRINITY_DN14710_c0_g2	A0A096LVP3_POEFO/157-337	A0A096LVP3.1 PF05783.9;DLIC;	49.4	1.8e-41
TRINITY_DN14710_c1_g1	I1F246_AMPQE/133-298	I1F246.1 PF02453.15;Reticulon;	48.3	4.6e-16
TRINITY_DN14714_c1_g1	I1F149_AMPQE/36-172	I1F149.3 PF08477.11;Roc;	70.3	5.7e-09
TRINITY_DN14715_c3_g1	I1FXC1_AMPQE/1-146	I1FXC1.1 PF01834.14;XRCC1_N;	69.7	3.1e-54
TRINITY_DN14717_c3_g1	C3ZU99_BRAFL/983-1127	C3ZU99.1 PF07534.14;TLD;	49.2	1e-07
TRINITY_DN14717_c3_g2	I1FE42_AMPQE/235-404	I1FE42.1 PF00566.16;RabGAP-TBC;	53.2	6.8e-27
TRINITY_DN14718_c1_g1	I1GAT2_AMPQE/28-313	I1GAT2.1 PF00069.23;Pkinase;	65	1.8e-109
TRINITY_DN14718_c1_g5	E9HUV5_DAPPU/43-173	E9HUV5.1 PF05222.13;AlaDh_PNT_N;	67.9	2.5e-41
TRINITY_DN14718_c1_g6	B3S296_TRIAD/301-420	B3S296.1 PF03953.15;Tubulin_C;	76.5	7e-18
TRINITY_DN14727_c0_g2	A7RYV8_NEMVE/25-305	A7RYV8.1 PF03372.21;Exo_endo_phos;	51.9	8.4e-49
TRINITY_DN14727_c0_g3	D6X0J0_TRICA/6-122	D6X0J0.1 PF06058.11;DCP1;	32.5	4.1e-14
TRINITY_DN14729_c0_g1	I1EE52_AMPQE/22-61	I1EE52.1 PF13923.4;zf-C3HC4_2;	55	3.2e-07
TRINITY_DN14731_c0_g1	E0W0U5_PEDHC/1-69	E0W0U5.1 PF16725.3;Nucleolin_bd;	49.2	1.5e-08
TRINITY_DN14732_c1_g1	I1G1B9_AMPQE/78-217	I1G1B9.1 PF01073.17;3Beta_HSD;	68.8	4.9e-38
TRINITY_DN14734_c4_g4	E9GAX7_DAPPU/50-131	E9GAX7.1 PF01066.19;CDP-OH_P_transf;	71.1	1.5e-27
TRINITY_DN14735_c0_g1	C3ZT81_BRAFL/330-582	C3ZT81.1 PF00069.23;Pkinase;	66.7	8.4e-89
TRINITY_DN14737_c0_g1	I1GHP1_AMPQE/126-267	I1GHP1.3 PF01936.16;NYN;	70.5	2.7e-18
TRINITY_DN14737_c0_g14	I1G5V8_AMPQE/23-301	I1G5V8.1 PF00814.23;Peptidase_M22;	81.4	1.2e-133
TRINITY_DN14737_c0_g3	I1GBW1_AMPQE/5-120	I1GBW1.1 PF01398.19;JAB;	78.4	3.8e-48
TRINITY_DN14737_c0_g9	I1GHP1_AMPQE/126-267	I1GHP1.3 PF01936.16;NYN;	75	1.2e-17
TRINITY_DN14739_c0_g1	I1FQH4_AMPQE/319-763	I1FQH4.1 PF04053.12;Coatomer_WDAD;	70.8	1.5e-189
TRINITY_DN14739_c0_g5	A0A087Y407_POEFO/48-423	A0A087Y407.2 PF14964.4;DUF4507;	26.7	1.9e-23
TRINITY_DN14739_c1_g1	A7RMQ5_NEMVE/23-98	A7RMQ5.1 PF15630.4;CENP-S;	56.6	2.6e-17
TRINITY_DN14740_c2_g6	H2ZPN4_CIOSA/138-224	H2ZPN4.1 PF00867.16;XPG_I;	62.5	2.1e-24
TRINITY_DN14744_c1_g2	I1EVP0_AMPQE/170-238	I1EVP0.1 PF06428.9;Sec2p;	65.5	1.1e-12
TRINITY_DN14745_c0_g10	C5DFJ8_LACTC/125-161	C5DFJ8.1 PF06747.11;CHCH;	73	1e-09
[truncated: 6,080 more rows]
