# Supplementary material for: Freshwater sponge hosts and their green algae symbionts: a tractable model to understand intracellular symbiosis
Source: PeerJ. 2021 Feb 11;9:e10654. doi: 10.7717/peerj.10654 (PMC7882143; doi:10.7717/peerj.10654)
Supplement: Supplemental Information 17 [file peerj-09-10654-s017.xlsx]

## Sheet: Sheet1
Query	swissprot_hit	swissprot_gene_name	swissprot_description	swissprot_identity	swissprot_evalue
TRINITY_DN10001_c0_g1	sp|Q91ZS8|RED1_MOUSE	Adarb1	Double-stranded RNA-specific editase 1 OS=Mus musculus GN=Adarb1 PE=1 SV=1	33.5	3.4e-44
TRINITY_DN10007_c0_g1	sp|P12424|GLNA_NICPL	-	Glutamine synthetase OS=Nicotiana plumbaginifolia PE=2 SV=1	91	6.4e-34
TRINITY_DN10027_c0_g1	sp|Q9UR07|TF211_SCHPO	Tf2-11	Transposon Tf2-11 polyprotein OS=Schizosaccharomyces pombe (strain 972 / ATCC 24843) GN=Tf2-11 PE=3 SV=1	43.3	5e-07
TRINITY_DN10028_c0_g1	sp|P40792|RAC1_DROME	Rac1	Ras-related protein Rac1 OS=Drosophila melanogaster GN=Rac1 PE=1 SV=2	79.7	4.7e-89
TRINITY_DN10034_c0_g1	sp|O22518|RSSA_SOYBN	-	40S ribosomal protein SA OS=Glycine max PE=2 SV=1	96.1	6.3e-37
TRINITY_DN10047_c0_g1	sp|Q02375|NDUS4_BOVIN	NDUFS4	NADH dehydrogenase [ubiquinone] iron-sulfur protein 4, mitochondrial OS=Bos taurus GN=NDUFS4 PE=1 SV=1	56.8	2.5e-34
TRINITY_DN10049_c0_g1	sp|P61221|ABCE1_HUMAN	ABCE1	ATP-binding cassette sub-family E member 1 OS=Homo sapiens GN=ABCE1 PE=1 SV=1	78.4	6.2e-282
TRINITY_DN10051_c0_g1	sp|Q5RJW4|UFM1_XENLA	ufm1	Ubiquitin-fold modifier 1 OS=Xenopus laevis GN=ufm1 PE=3 SV=1	93.9	9.8e-38
TRINITY_DN10058_c0_g1	sp|Q9C6B9|PEAM3_ARATH	NMT3	Phosphoethanolamine N-methyltransferase 3 OS=Arabidopsis thaliana GN=NMT3 PE=2 SV=2	34.7	1.9e-79
TRINITY_DN10059_c0_g1	sp|Q87GM3|ADE_VIBPA	VPA1292	Adenine deaminase OS=Vibrio parahaemolyticus serotype O3:K6 (strain RIMD 2210633) GN=VPA1292 PE=3 SV=1	55.3	3.1e-33
TRINITY_DN10059_c0_g2	sp|Q1LQ00|ADE_CUPMC	Rmet_0890	Adenine deaminase OS=Cupriavidus metallidurans (strain ATCC 43123 / DSM 2839 / NBRC 102507 / CH34) GN=Rmet_0890 PE=3 SV=1	53.6	2.2e-59
TRINITY_DN10081_c0_g2	sp|B1Y7G9|EFG_LEPCP	fusA	Elongation factor G OS=Leptothrix cholodnii (strain ATCC 51168 / LMG 8142 / SP-6) GN=fusA PE=3 SV=1	96.3	3.6e-38
TRINITY_DN10087_c0_g1	sp|Q8IYY4|DZI1L_HUMAN	DZIP1L	Zinc finger protein DZIP1L OS=Homo sapiens GN=DZIP1L PE=1 SV=2	45.3	1.4e-08
TRINITY_DN10109_c0_g1	sp|Q9VHD3|MAAI1_DROME	GstZ1	Probable maleylacetoacetate isomerase 1 OS=Drosophila melanogaster GN=GstZ1 PE=1 SV=1	53.3	5.4e-63
TRINITY_DN10122_c0_g1	sp|Q6NVP7|PABP2_XENTR	pabpn1	Polyadenylate-binding protein 2 OS=Xenopus tropicalis GN=pabpn1 PE=2 SV=1	65	3.7e-44
TRINITY_DN10136_c0_g1	sp|P84173|PHB_CHICK	PHB	Prohibitin OS=Gallus gallus GN=PHB PE=1 SV=1	69.8	8.7e-98
TRINITY_DN10141_c0_g1	sp|Q3T0Q4|NDKB_BOVIN	NME2	Nucleoside diphosphate kinase B OS=Bos taurus GN=NME2 PE=1 SV=1	74.3	4.1e-62
TRINITY_DN10144_c0_g1	sp|P23709|NDUS3_BOVIN	NDUFS3	NADH dehydrogenase [ubiquinone] iron-sulfur protein 3, mitochondrial OS=Bos taurus GN=NDUFS3 PE=1 SV=1	70.9	7.5e-86
TRINITY_DN10145_c0_g1	sp|P34528|YM67_CAEEL	K12H4.7	Putative serine protease K12H4.7 OS=Caenorhabditis elegans GN=K12H4.7 PE=3 SV=2	38.8	4.8e-77
TRINITY_DN10165_c0_g1	sp|Q6INV3|LRC57_XENLA	lrrc57	Leucine-rich repeat-containing protein 57 OS=Xenopus laevis GN=lrrc57 PE=2 SV=1	67.5	4.7e-26
TRINITY_DN10188_c0_g1	sp|P30352|SRSF2_CHICK	SRSF2	Serine/arginine-rich splicing factor 2 OS=Gallus gallus GN=SRSF2 PE=2 SV=1	68.2	2.9e-33
TRINITY_DN10200_c0_g1	sp|Q28ID3|GLRX3_XENTR	glrx3	Glutaredoxin-3 OS=Xenopus tropicalis GN=glrx3 PE=2 SV=2	58.8	3.4e-107
TRINITY_DN10201_c0_g1	sp|Q7ZTM6|TOM40_XENLA	tomm40	Mitochondrial import receptor subunit TOM40 homolog OS=Xenopus laevis GN=tomm40 PE=2 SV=1	38.6	1e-55
TRINITY_DN10201_c0_g2	sp|Q0BUM5|RL17_GRABC	rplQ	50S ribosomal protein L17 OS=Granulibacter bethesdensis (strain ATCC BAA-1260 / CGDNIH1) GN=rplQ PE=3 SV=1	51.7	2.7e-27
TRINITY_DN10204_c0_g1	sp|Q6DDB9|PNO1_XENTR	pno1	RNA-binding protein PNO1 OS=Xenopus tropicalis GN=pno1 PE=2 SV=1	79.4	9.4e-86
TRINITY_DN10209_c0_g1	sp|P20135|GSTT1_CHICK	GSTT1	Glutathione S-transferase theta-1 OS=Gallus gallus GN=GSTT1 PE=1 SV=3	37.2	1.8e-39
TRINITY_DN10222_c0_g1	sp|Q0KIA2|Y9801_DROME	CG9801	PP2C-like domain-containing protein CG9801 OS=Drosophila melanogaster GN=CG9801 PE=2 SV=1	30.4	2e-37
TRINITY_DN10230_c0_g1	sp|Q3UN02|LCLT1_MOUSE	Lclat1	Lysocardiolipin acyltransferase 1 OS=Mus musculus GN=Lclat1 PE=1 SV=2	37.2	2.7e-70
TRINITY_DN10241_c0_g1	sp|Q54UT2|DGK_DICDI	dgk	Deoxyguanosine kinase OS=Dictyostelium discoideum GN=dgk PE=1 SV=2	45.2	5.9e-47
TRINITY_DN10252_c0_g1	sp|Q63880|EST3A_MOUSE	Ces3a	Carboxylesterase 3A OS=Mus musculus GN=Ces3a PE=1 SV=2	100	8.8e-39
TRINITY_DN10275_c0_g1	sp|P00397|COX1_MOUSE	Mtco1	Cytochrome c oxidase subunit 1 OS=Mus musculus GN=Mtco1 PE=1 SV=2	91.7	8.2e-261
TRINITY_DN10275_c1_g1	sp|P00395|COX1_HUMAN	MT-CO1	Cytochrome c oxidase subunit 1 OS=Homo sapiens GN=MT-CO1 PE=1 SV=1	90.5	2.1e-65
TRINITY_DN10289_c0_g1	sp|P24008|S5A1_RAT	Srd5a1	3-oxo-5-alpha-steroid 4-dehydrogenase 1 OS=Rattus norvegicus GN=Srd5a1 PE=1 SV=2	48.2	1.3e-62
TRINITY_DN102_c0_g2	sp|Q8C552|FA78A_MOUSE	Fam78a	Protein FAM78A OS=Mus musculus GN=Fam78a PE=1 SV=1	41.6	8.6e-32
TRINITY_DN10330_c0_g2	sp|Q24K03|THUM1_BOVIN	THUMPD1	THUMP domain-containing protein 1 OS=Bos taurus GN=THUMPD1 PE=2 SV=1	39.8	1.4e-12
TRINITY_DN10341_c0_g4	sp|Q3T134|SPCS1_BOVIN	SPCS1	Signal peptidase complex subunit 1 OS=Bos taurus GN=SPCS1 PE=3 SV=1	42.6	6.2e-18
TRINITY_DN10347_c0_g1	sp|P18646|DEF_VIGUN	-	Defensin-like protein OS=Vigna unguiculata PE=3 SV=1	82.7	8.7e-34
TRINITY_DN10352_c0_g1	sp|Q5T0D9|TPRGL_HUMAN	TPRG1L	Tumor protein p63-regulated gene 1-like protein OS=Homo sapiens GN=TPRG1L PE=1 SV=1	30.7	1.8e-27
TRINITY_DN10369_c0_g1	sp|P50613|CDK7_HUMAN	CDK7	Cyclin-dependent kinase 7 OS=Homo sapiens GN=CDK7 PE=1 SV=1	57.7	2.2e-21
TRINITY_DN10371_c0_g1	sp|P23258|TBG1_HUMAN	TUBG1	Tubulin gamma-1 chain OS=Homo sapiens GN=TUBG1 PE=1 SV=2	82.7	8.9e-219
TRINITY_DN10380_c0_g1	sp|Q5XJ36|PARK7_DANRE	park7	Protein deglycase DJ-1zDJ-1 OS=Danio rerio GN=park7 PE=2 SV=1	62.5	2.5e-56
TRINITY_DN10396_c0_g4	sp|O00139|KIF2A_HUMAN	KIF2A	Kinesin-like protein KIF2A OS=Homo sapiens GN=KIF2A PE=1 SV=3	40	2.1e-31
TRINITY_DN10398_c0_g1	sp|P36907|CHIX_PEA	-	Endochitinase OS=Pisum sativum PE=2 SV=1	52.2	3.8e-12
TRINITY_DN10413_c0_g1	sp|Q2TA25|PLK1_BOVIN	PLK1	Serine/threonine-protein kinase PLK1 OS=Bos taurus GN=PLK1 PE=2 SV=2	62.1	1.7e-210
TRINITY_DN10420_c0_g1	sp|Q9ASR1|EF2_ARATH	LOS1	Elongation factor 2 OS=Arabidopsis thaliana GN=LOS1 PE=1 SV=1	87.1	3.5e-36
TRINITY_DN10448_c0_g1	sp|Q3T0C2|PGDH_BOVIN	HPGD	15-hydroxyprostaglandin dehydrogenase [NAD(+)] OS=Bos taurus GN=HPGD PE=2 SV=1	47	5.8e-06
TRINITY_DN10475_c0_g1	sp|Q2QLY5|METE1_ORYSJ	Os12g0623900	5-methyltetrahydropteroyltriglutamate--homocysteine methyltransferase 1 OS=Oryza sativa subsp. japonica GN=Os12g0623900 PE=2 SV=1	94.1	2e-26
TRINITY_DN10475_c0_g4	sp|Q42699|METE_CATRO	METE	5-methyltetrahydropteroyltriglutamate--homocysteine methyltransferase OS=Catharanthus roseus GN=METE PE=2 SV=1	89	7.6e-32
TRINITY_DN10493_c0_g1	sp|P70665|SIAE_MOUSE	Siae	Sialate O-acetylesterase OS=Mus musculus GN=Siae PE=1 SV=3	37.1	1.8e-91
TRINITY_DN10512_c0_g1	sp|P48149|RS15A_DROME	RpS15Aa	40S ribosomal protein S15Aa OS=Drosophila melanogaster GN=RpS15Aa PE=1 SV=2	79.4	1.5e-54
TRINITY_DN10519_c0_g1	sp|P02402|RLA1_ARTSA	-	60S acidic ribosomal protein P1 OS=Artemia salina PE=1 SV=2	58.7	3.7e-14
TRINITY_DN10522_c0_g1	sp|P14755|CRYL1_RABIT	CRYL1	Lambda-crystallin OS=Oryctolagus cuniculus GN=CRYL1 PE=1 SV=3	48.2	7.6e-81
TRINITY_DN10524_c0_g2	sp|Q80WE4|KI20B_MOUSE	Kif20b	Kinesin-like protein KIF20B OS=Mus musculus GN=Kif20b PE=1 SV=3	48.2	9.9e-34
TRINITY_DN10524_c0_g3	sp|O95235|KI20A_HUMAN	KIF20A	Kinesin-like protein KIF20A OS=Homo sapiens GN=KIF20A PE=1 SV=1	33.3	2.3e-29
TRINITY_DN10579_c0_g1	sp|P10867|GGLO_RAT	Gulo	L-gulonolactone oxidase OS=Rattus norvegicus GN=Gulo PE=1 SV=3	34.4	5e-28
TRINITY_DN10582_c0_g1	sp|P03076|MT_POVM3	-	Middle T antigen OS=Murine polyomavirus (strain 3) PE=1 SV=2	100	7.7e-35
TRINITY_DN10582_c0_g2	sp|P03076|MT_POVM3	-	Middle T antigen OS=Murine polyomavirus (strain 3) PE=1 SV=2	100	3.7e-104
TRINITY_DN10582_c0_g3	sp|P03070|LT_SV40	-	Large T antigen OS=Simian virus 40 PE=1 SV=2	98.3	2.9e-28
TRINITY_DN10582_c0_g4	sp|P03070|LT_SV40	-	Large T antigen OS=Simian virus 40 PE=1 SV=2	100	4.4e-14
TRINITY_DN10583_c0_g1	sp|Q9Y3B8|ORN_HUMAN	REXO2	Oligoribonuclease, mitochondrial OS=Homo sapiens GN=REXO2 PE=1 SV=3	61	1.2e-62
TRINITY_DN10584_c0_g1	sp|Q5F3V3|PDS5A_CHICK	PDS5A	Sister chromatid cohesion protein PDS5 homolog A OS=Gallus gallus GN=PDS5A PE=2 SV=2	37.4	2.9e-56
TRINITY_DN10586_c0_g1	sp|A4QND5|NIP7_XENTR	nip7	60S ribosome subunit biogenesis protein NIP7 homolog OS=Xenopus tropicalis GN=nip7 PE=2 SV=1	73.7	1.1e-76
TRINITY_DN1059_c0_g1	sp|Q8VCM7|FIBG_MOUSE	Fgg	Fibrinogen gamma chain OS=Mus musculus GN=Fgg PE=1 SV=1	100	1e-21
TRINITY_DN10609_c0_g1	sp|Q58DQ5|RT09_BOVIN	MRPS9	28S ribosomal protein S9, mitochondrial OS=Bos taurus GN=MRPS9 PE=1 SV=3	36.9	1.2e-53
TRINITY_DN10615_c0_g1	sp|O22611|DRM1_PEA	DRM1	Dormancy-associated protein 1 OS=Pisum sativum GN=DRM1 PE=2 SV=1	82	1.1e-19
TRINITY_DN10620_c0_g1	sp|P45456|ACEA1_SOYBN	ICL1	Isocitrate lyase 1 (Fragment) OS=Glycine max GN=ICL1 PE=2 SV=1	97.5	7.2e-109
TRINITY_DN10623_c0_g1	sp|Q06AB3|UCHL3_PIG	UCHL3	Ubiquitin carboxyl-terminal hydrolase isozyme L3 OS=Sus scrofa GN=UCHL3 PE=2 SV=1	51.6	1.4e-64
TRINITY_DN10631_c0_g1	sp|Q9CQ66|TC1D2_MOUSE	Tctex1d2	Tctex1 domain-containing protein 2 OS=Mus musculus GN=Tctex1d2 PE=1 SV=1	60.3	1e-33
TRINITY_DN10640_c0_g1	sp|Q9UJX0|OSGI1_HUMAN	OSGIN1	Oxidative stress-induced growth inhibitor 1 OS=Homo sapiens GN=OSGIN1 PE=1 SV=3	35	5.8e-76
TRINITY_DN10646_c0_g1	sp|Q9ERS2|NDUAD_MOUSE	Ndufa13	NADH dehydrogenase [ubiquinone] 1 alpha subcomplex subunit 13 OS=Mus musculus GN=Ndufa13 PE=1 SV=3	53.2	6.3e-29
TRINITY_DN10656_c0_g1	sp|Q8WPW2|PDX1_SUBDO	SNZERR	Pyridoxal 5'-phosphate synthase subunit SNZERR OS=Suberites domuncula GN=SNZERR PE=2 SV=2	83.2	4.2e-136
TRINITY_DN10657_c0_g1	sp|P13474|ETS1A_CHICK	ETS1	Transforming protein p54/c-ets-1 OS=Gallus gallus GN=ETS1 PE=2 SV=1	69.1	2.6e-35
TRINITY_DN10658_c0_g1	sp|P32429|RL7A_CHICK	RPL7A	60S ribosomal protein L7a OS=Gallus gallus GN=RPL7A PE=2 SV=2	64.4	1e-90
TRINITY_DN10661_c0_g2	sp|Q924W5|SMC6_MOUSE	Smc6	Structural maintenance of chromosomes protein 6 OS=Mus musculus GN=Smc6 PE=1 SV=1	58.8	1.7e-53
TRINITY_DN10669_c0_g1	sp|P32138|SQASE_ECOLI	yihQ	Sulfoquinovosidase OS=Escherichia coli (strain K12) GN=yihQ PE=1 SV=3	34.6	8.1e-98
TRINITY_DN1066_c0_g1	sp|Q04886|SOX8_MOUSE	Sox8	Transcription factor SOX-8 OS=Mus musculus GN=Sox8 PE=2 SV=2	58.9	1.4e-27
TRINITY_DN10671_c0_g1	sp|Q9LZC3|MASY_ARATH	MLS	Malate synthase OS=Arabidopsis thaliana GN=MLS PE=1 SV=1	100	2.1e-37
TRINITY_DN10671_c0_g2	sp|P45458|MASY_SOYBN	-	Malate synthase, glyoxysomal (Fragment) OS=Glycine max PE=2 SV=1	92.3	8.3e-84
TRINITY_DN10672_c0_g1	sp|Q3SZR8|SRSF3_BOVIN	SRSF3	Serine/arginine-rich splicing factor 3 OS=Bos taurus GN=SRSF3 PE=2 SV=1	51.7	8e-16
TRINITY_DN10674_c0_g1	sp|Q5W5U4|DDX4_BOVIN	DDX4	Probable ATP-dependent RNA helicase DDX4 OS=Bos taurus GN=DDX4 PE=2 SV=1	56.2	6.8e-145
TRINITY_DN10697_c0_g2	sp|Q42971|ENO_ORYSJ	ENO1	Enolase OS=Oryza sativa subsp. japonica GN=ENO1 PE=1 SV=2	90.6	1e-26
TRINITY_DN10711_c0_g1	sp|P09189|HSP7C_PETHY	HSP70	Heat shock cognate 70 kDa protein OS=Petunia hybrida GN=HSP70 PE=2 SV=1	98.5	1.4e-32
TRINITY_DN10711_c0_g3	sp|P27322|HSP72_SOLLC	HSC-2	Heat shock cognate 70 kDa protein 2 OS=Solanum lycopersicum GN=HSC-2 PE=2 SV=1	100	1e-30
TRINITY_DN10718_c0_g1	sp|P63154|CRNL1_MOUSE	Crnkl1	Crooked neck-like protein 1 OS=Mus musculus GN=Crnkl1 PE=1 SV=1	73.4	8.7e-174
TRINITY_DN10724_c0_g2	sp|Q99JB2|STML2_MOUSE	Stoml2	Stomatin-like protein 2, mitochondrial OS=Mus musculus GN=Stoml2 PE=1 SV=1	59.2	2.4e-75
TRINITY_DN10726_c0_g1	sp|Q54W11|MCFL_DICDI	mcfL	Mitochondrial substrate carrier family protein L OS=Dictyostelium discoideum GN=mcfL PE=3 SV=1	24.1	5.8e-17
TRINITY_DN10729_c0_g1	sp|P47013|DS1P1_YEAST	LCB3	Dihydrosphingosine 1-phosphate phosphatase LCB3 OS=Saccharomyces cerevisiae (strain ATCC 204508 / S288c) GN=LCB3 PE=1 SV=1	23	3.4e-07
TRINITY_DN10734_c0_g1	sp|Q06931|ABR17_PEA	-	ABA-responsive protein ABR17 OS=Pisum sativum PE=2 SV=1	56.5	1.7e-45
TRINITY_DN1073_c0_g1	sp|P22789|ST2A2_RAT	St2a2	Alcohol sulfotransferase A OS=Rattus norvegicus GN=St2a2 PE=1 SV=2	24.5	4.1e-12
TRINITY_DN10741_c0_g1	sp|Q7TSV9|ENKD1_MOUSE	Enkd1	Enkurin domain-containing protein 1 OS=Mus musculus GN=Enkd1 PE=1 SV=1	55	7.3e-24
TRINITY_DN10755_c0_g1	sp|Q9NRX6|KISHB_HUMAN	TMEM167B	Protein kish-B OS=Homo sapiens GN=TMEM167B PE=3 SV=1	73	4.8e-24
TRINITY_DN10759_c0_g2	sp|P08985|H2AV_DROME	His2Av	Histone H2A.v OS=Drosophila melanogaster GN=His2Av PE=1 SV=2	95.3	8.1e-47
TRINITY_DN10762_c0_g1	sp|Q8N5M1|ATPF2_HUMAN	ATPAF2	ATP synthase mitochondrial F1 complex assembly factor 2 OS=Homo sapiens GN=ATPAF2 PE=1 SV=1	44.6	2.6e-54
TRINITY_DN10768_c0_g1	sp|P26642|EF1GA_XENLA	eef1g-a	Elongation factor 1-gamma-A OS=Xenopus laevis GN=eef1g-a PE=1 SV=1	62.3	9.3e-132
TRINITY_DN10795_c0_g1	sp|Q92828|COR2A_HUMAN	CORO2A	Coronin-2A OS=Homo sapiens GN=CORO2A PE=2 SV=2	49.3	4.7e-61
TRINITY_DN10804_c0_g1	sp|Q8R3N6|THOC1_MOUSE	Thoc1	THO complex subunit 1 OS=Mus musculus GN=Thoc1 PE=1 SV=1	48.6	8e-135
TRINITY_DN10810_c0_g1	sp|Q5XGR8|LACB2_XENLA	lactb2	Endoribonuclease LACTB2 OS=Xenopus laevis GN=lactb2 PE=2 SV=1	48.8	1e-75
TRINITY_DN10820_c0_g1	sp|Q96HH6|TMM19_HUMAN	TMEM19	Transmembrane protein 19 OS=Homo sapiens GN=TMEM19 PE=1 SV=1	50.7	1.4e-46
TRINITY_DN10829_c0_g1	sp|Q12GQ5|ATPL_POLSJ	atpE	ATP synthase subunit c OS=Polaromonas sp. (strain JS666 / ATCC BAA-500) GN=atpE PE=3 SV=1	88.3	1.6e-28
TRINITY_DN10830_c0_g2	sp|Q6N075|MFSD5_HUMAN	MFSD5	Molybdate-anion transporter OS=Homo sapiens GN=MFSD5 PE=1 SV=2	43.7	1.2e-53
TRINITY_DN10833_c0_g1	sp|P48166|RL44_CAEEL	rpl-41	Ribosomal protein rpl-41 OS=Caenorhabditis elegans GN=rpl-41 PE=3 SV=2	78.8	4.6e-40
TRINITY_DN10852_c0_g3	sp|P05630|ATPD_BOVIN	ATP5D	ATP synthase subunit delta, mitochondrial OS=Bos taurus GN=ATP5D PE=1 SV=2	53.4	3.5e-31
TRINITY_DN10859_c0_g1	sp|Q8C0D0|TRUB1_MOUSE	Trub1	Probable tRNA pseudouridine synthase 1 OS=Mus musculus GN=Trub1 PE=1 SV=1	52.8	3.3e-13
TRINITY_DN10862_c0_g2	sp|Q6DEL2|CLPT1_DANRE	clptm1	Cleft lip and palate transmembrane protein 1 homolog OS=Danio rerio GN=clptm1 PE=2 SV=1	60.8	1.4e-113
TRINITY_DN10862_c0_g3	sp|O96005|CLPT1_HUMAN	CLPTM1	Cleft lip and palate transmembrane protein 1 OS=Homo sapiens GN=CLPTM1 PE=1 SV=1	41.5	5.1e-59
TRINITY_DN10864_c0_g1	sp|Q16342|PDCD2_HUMAN	PDCD2	Programmed cell death protein 2 OS=Homo sapiens GN=PDCD2 PE=1 SV=2	36.3	5.7e-68
TRINITY_DN10868_c0_g1	sp|P49154|RS2_URECA	RPS2	40S ribosomal protein S2 OS=Urechis caupo GN=RPS2 PE=2 SV=1	84.7	6e-36
TRINITY_DN10876_c0_g2	sp|P92527|CCMC_ARATH	CCMC	Putative cytochrome c biosynthesis ccmC-like mitochondrial protein OS=Arabidopsis thaliana GN=CCMC PE=2 SV=4	97	1.1e-49
TRINITY_DN10884_c0_g1	sp|Q8VEG6|CNO6L_MOUSE	Cnot6l	CCR4-NOT transcription complex subunit 6-like OS=Mus musculus GN=Cnot6l PE=1 SV=2	58.4	6.6e-128
TRINITY_DN108_c0_g1	sp|Q9VHA0|SCM_DROME	Scm	Polycomb protein Scm OS=Drosophila melanogaster GN=Scm PE=1 SV=2	39.7	4.4e-10
TRINITY_DN10912_c0_g3	sp|A2ALW5|DJC25_MOUSE	Dnajc25	DnaJ homolog subfamily C member 25 OS=Mus musculus GN=Dnajc25 PE=1 SV=1	51.9	4.7e-38
TRINITY_DN10921_c0_g1	sp|C3Z724|UBE2S_BRAFL	BRAFLDRAFT_259979	Ubiquitin-conjugating enzyme E2 S OS=Branchiostoma floridae GN=BRAFLDRAFT_259979 PE=3 SV=1	78.3	5.3e-73
TRINITY_DN10945_c0_g1	sp|O15432|COPT2_HUMAN	SLC31A2	Probable low affinity copper uptake protein 2 OS=Homo sapiens GN=SLC31A2 PE=1 SV=1	33.6	6.5e-06
TRINITY_DN10954_c0_g1	sp|Q6IMH0|TEPP_MOUSE	Tepp	Testis, prostate and placenta-expressed protein OS=Mus musculus GN=Tepp PE=2 SV=1	29.4	3.4e-07
TRINITY_DN10961_c0_g1	sp|Q9JJ94|SSNA1_MOUSE	Ssna1	Sjoegren syndrome nuclear autoantigen 1 homolog OS=Mus musculus GN=Ssna1 PE=1 SV=1	44.4	3.3e-14
TRINITY_DN10961_c0_g2	sp|Q9QYU4|CRYM_RAT	Crym	Ketimine reductase mu-crystallin OS=Rattus norvegicus GN=Crym PE=1 SV=1	49.4	3.8e-73
TRINITY_DN10972_c0_g1	sp|B7HE87|MAF_BACC4	maf	Septum formation protein Maf OS=Bacillus cereus (strain B4264) GN=maf PE=3 SV=1	56.5	5.4e-21
TRINITY_DN10975_c1_g1	sp|P40941|ADT2_ARATH	AAC2	ADP,ATP carrier protein 2, mitochondrial OS=Arabidopsis thaliana GN=AAC2 PE=1 SV=2	67	3.4e-94
TRINITY_DN10977_c0_g1	sp|P19023|ATPBM_MAIZE	ATPB	ATP synthase subunit beta, mitochondrial OS=Zea mays GN=ATPB PE=2 SV=1	87.6	3e-38
TRINITY_DN1097_c0_g1	sp|P91143|CGI58_CAEEL	abhd-5.1	Abhydrolase domain-containing protein cgi-58 OS=Caenorhabditis elegans GN=abhd-5.1 PE=1 SV=2	32.8	7.1e-44
TRINITY_DN10982_c0_g1	sp|O23787|THI4_CITSI	THI1	Thiamine thiazole synthase, chloroplastic OS=Citrus sinensis GN=THI1 PE=2 SV=1	96.1	2.7e-51
TRINITY_DN10985_c0_g1	sp|Q21305|SOX2_CAEEL	sox-2	Transcription factor sox-2 OS=Caenorhabditis elegans GN=sox-2 PE=1 SV=2	46.9	4.6e-06
TRINITY_DN10987_c0_g1	sp|Q56JX8|RS13_BOVIN	RPS13	40S ribosomal protein S13 OS=Bos taurus GN=RPS13 PE=2 SV=3	82.1	3.1e-66
TRINITY_DN11019_c0_g1	sp|Q5E9F8|H33_BOVIN	H3F3A	Histone H3.3 OS=Bos taurus GN=H3F3A PE=1 SV=3	99.3	1e-67
TRINITY_DN11026_c0_g1	sp|Q10943|ARF12_CAEEL	arf-1.2	ADP-ribosylation factor 1-like 2 OS=Caenorhabditis elegans GN=arf-1.2 PE=2 SV=2	53	9.6e-47
TRINITY_DN11031_c0_g2	sp|A5D6V4|TM17B_DANRE	Tmem17b	Transmembrane protein 17B OS=Danio rerio GN=Tmem17b PE=2 SV=1	47.6	1.2e-27
TRINITY_DN11059_c0_g1	sp|P54765|RAN1A_LOTJA	RAN1A	GTP-binding nuclear protein Ran1A (Fragment) OS=Lotus japonicus GN=RAN1A PE=2 SV=1	95.5	7.2e-30
TRINITY_DN1105_c0_g2	sp|P61209|ARF1_DROME	Arf79F	ADP-ribosylation factor 1 OS=Drosophila melanogaster GN=Arf79F PE=2 SV=2	51.5	3.6e-26
TRINITY_DN11071_c0_g1	sp|Q9VUX3|NOTUM_DROME	Notum	Palmitoleoyl-protein carboxylesterase NOTUM OS=Drosophila melanogaster GN=Notum PE=1 SV=3	30.9	3.2e-17
TRINITY_DN11073_c1_g1	sp|Q6DFM9|TOM20_XENTR	tomm20	Mitochondrial import receptor subunit TOM20 homolog OS=Xenopus tropicalis GN=tomm20 PE=2 SV=1	41.5	1.3e-19
TRINITY_DN11092_c0_g1	sp|Q5ZI78|TFIP8_CHICK	TNFAIP8	Tumor necrosis factor alpha-induced protein 8 OS=Gallus gallus GN=TNFAIP8 PE=2 SV=1	46.4	2.5e-43
TRINITY_DN11101_c0_g1	sp|Q0IIJ0|NAA50_BOVIN	NAA50	N-alpha-acetyltransferase 50 OS=Bos taurus GN=NAA50 PE=2 SV=1	69.7	1.9e-62
TRINITY_DN11108_c0_g1	sp|Q29RR0|RAB26_BOVIN	RAB26	Ras-related protein Rab-26 OS=Bos taurus GN=RAB26 PE=2 SV=1	30.4	9e-16
TRINITY_DN11112_c0_g1	sp|P10605|CATB_MOUSE	Ctsb	Cathepsin B OS=Mus musculus GN=Ctsb PE=1 SV=2	63.2	3e-20
TRINITY_DN11114_c0_g2	sp|Q5E983|EF1B_BOVIN	EEF1B	Elongation factor 1-beta OS=Bos taurus GN=EEF1B PE=2 SV=3	57.9	3.2e-21
TRINITY_DN11114_c0_g3	sp|Q9YGQ1|EF1B_CHICK	EEF1B	Elongation factor 1-beta OS=Gallus gallus GN=EEF1B PE=2 SV=3	74	3.3e-38
TRINITY_DN11155_c0_g1	sp|Q6B857|CFA20_BOVIN	CFAP20	Cilia- and flagella-associated protein 20 OS=Bos taurus GN=CFAP20 PE=2 SV=1	99.3	2.5e-74
TRINITY_DN11161_c0_g1	sp|Q96T60|PNKP_HUMAN	PNKP	Bifunctional polynucleotide phosphatase/kinase OS=Homo sapiens GN=PNKP PE=1 SV=1	44	1.3e-78
TRINITY_DN11164_c0_g3	sp|Q5EAD6|RL15_BOVIN	RPL15	60S ribosomal protein L15 OS=Bos taurus GN=RPL15 PE=2 SV=3	77	8.5e-91
TRINITY_DN11164_c0_g4	sp|Q9D6X5|S52A3_MOUSE	Slc52a3	Solute carrier family 52, riboflavin transporter, member 3 OS=Mus musculus GN=Slc52a3 PE=1 SV=3	38.2	2e-59
TRINITY_DN11169_c0_g1	sp|A9BNB8|PNP_DELAS	pnp	Polyribonucleotide nucleotidyltransferase OS=Delftia acidovorans (strain DSM 14801 / SPH-1) GN=pnp PE=3 SV=1	87.8	1.3e-36
TRINITY_DN11171_c0_g1	sp|Q9USW6|DPM2_SCHPO	dpm2	Dolichol phosphate-mannose biosynthesis regulatory protein OS=Schizosaccharomyces pombe (strain 972 / ATCC 24843) GN=dpm2 PE=3 SV=1	37.7	1.4e-06
TRINITY_DN1118_c0_g1	sp|P01066|IBB1_ARAHY	-	Bowman-Birk type proteinase inhibitor A-II OS=Arachis hypogaea PE=1 SV=1	100	8.4e-18
TRINITY_DN11206_c0_g1	sp|Q2QUN2|LAC24_ORYSJ	LAC24	Laccase-24 OS=Oryza sativa subsp. japonica GN=LAC24 PE=2 SV=1	27.4	1.2e-38
TRINITY_DN11207_c0_g1	sp|P18067|RAB7A_CANLF	RAB7A	Ras-related protein Rab-7a OS=Canis lupus familiaris GN=RAB7A PE=2 SV=1	59.8	3.6e-31
TRINITY_DN11224_c0_g1	sp|Q16TM5|BND7A_AEDAE	AAEL010189	Band 7 protein AAEL010189 OS=Aedes aegypti GN=AAEL010189 PE=3 SV=1	31.1	5.4e-22
TRINITY_DN11232_c0_g1	sp|O95817|BAG3_HUMAN	BAG3	BAG family molecular chaperone regulator 3 OS=Homo sapiens GN=BAG3 PE=1 SV=3	72.7	9.6e-09
TRINITY_DN11250_c0_g1	sp|Q6DBT3|TXD17_DANRE	txndc17	Thioredoxin domain-containing protein 17 OS=Danio rerio GN=txndc17 PE=2 SV=1	51.6	3.6e-28
TRINITY_DN11251_c0_g1	sp|Q6DFM1|SNF5_XENTR	smarcb1	SWI/SNF-related matrix-associated actin-dependent regulator of chromatin subfamily B member 1 OS=Xenopus tropicalis GN=smarcb1 PE=2 SV=1	54.6	5e-114
TRINITY_DN11283_c0_g1	sp|A5PKG7|KCTD5_BOVIN	KCTD5	BTB/POZ domain-containing protein KCTD5 OS=Bos taurus GN=KCTD5 PE=2 SV=1	52.1	8.2e-55
TRINITY_DN11287_c0_g1	sp|Q9CQH8|RPP14_MOUSE	Rpp14	Ribonuclease P protein subunit p14 OS=Mus musculus GN=Rpp14 PE=1 SV=1	43.1	1.1e-12
TRINITY_DN11289_c0_g1	sp|Q6DMN8|SPAT4_PANTR	SPATA4	Spermatogenesis-associated protein 4 OS=Pan troglodytes GN=SPATA4 PE=2 SV=1	59.6	1.1e-34
TRINITY_DN11296_c0_g1	sp|O42446|DNAS1_OREMO	dnase1	Deoxyribonuclease-1 OS=Oreochromis mossambicus GN=dnase1 PE=1 SV=2	40.3	8.3e-10
TRINITY_DN11307_c0_g2	sp|A2SC68|ATPA_METPP	atpA	ATP synthase subunit alpha OS=Methylibium petroleiphilum (strain ATCC BAA-1232 / LMG 22953 / PM1) GN=atpA PE=3 SV=1	92.7	1.5e-36
TRINITY_DN11309_c0_g1	sp|P30707|RL9_PEA	RPL9	60S ribosomal protein L9 OS=Pisum sativum GN=RPL9 PE=2 SV=1	90.4	9.8e-49
TRINITY_DN11311_c0_g2	sp|Q9FN03|UVR8_ARATH	UVR8	Ultraviolet-B receptor UVR8 OS=Arabidopsis thaliana GN=UVR8 PE=1 SV=1	30.3	5e-27
TRINITY_DN11311_c0_g5	sp|Q15751|HERC1_HUMAN	HERC1	Probable E3 ubiquitin-protein ligase HERC1 OS=Homo sapiens GN=HERC1 PE=1 SV=2	34.6	3.4e-16
TRINITY_DN11338_c2_g1	sp|Q3T168|CYBP_BOVIN	CACYBP	Calcyclin-binding protein OS=Bos taurus GN=CACYBP PE=2 SV=1	43.4	1.1e-11
TRINITY_DN11344_c0_g1	sp|Q04967|HSP76_PIG	HSPA6	Heat shock 70 kDa protein 6 OS=Sus scrofa GN=HSPA6 PE=2 SV=1	50.4	6.9e-147
TRINITY_DN11353_c1_g1	sp|Q8S919|UBC5B_ORYSJ	UBC5B	Ubiquitin-conjugating enzyme E2 5B OS=Oryza sativa subsp. japonica GN=UBC5B PE=2 SV=1	96.8	4.9e-31
TRINITY_DN11353_c1_g2	sp|Q94F47|UBC28_ARATH	UBC28	Ubiquitin-conjugating enzyme E2 28 OS=Arabidopsis thaliana GN=UBC28 PE=2 SV=1	93.4	2.3e-28
TRINITY_DN11354_c1_g1	sp|Q3TA59|JMJD8_MOUSE	Jmjd8	JmjC domain-containing protein 8 OS=Mus musculus GN=Jmjd8 PE=2 SV=2	56.7	1.4e-46
TRINITY_DN11369_c0_g1	sp|B0BNM9|GLTP_RAT	GLTP	Glycolipid transfer protein OS=Rattus norvegicus GN=GLTP PE=2 SV=1	40.2	6.3e-37
TRINITY_DN11370_c0_g1	sp|Q5TZ24|MOXD1_DANRE	moxd1	DBH-like monooxygenase protein 1 homolog OS=Danio rerio GN=moxd1 PE=2 SV=2	30.8	2.8e-34
TRINITY_DN11373_c0_g1	sp|O09112|DUS8_MOUSE	Dusp8	Dual specificity protein phosphatase 8 OS=Mus musculus GN=Dusp8 PE=2 SV=1	26.7	4.9e-08
TRINITY_DN11376_c0_g1	sp|Q8BTN6|LENG9_MOUSE	Leng9	Leukocyte receptor cluster member 9 OS=Mus musculus GN=Leng9 PE=2 SV=1	36.8	1.6e-25
TRINITY_DN11379_c0_g1	sp|Q7T3C7|RT4I1_DANRE	rtn4ip1	Reticulon-4-interacting protein 1 homolog, mitochondrial OS=Danio rerio GN=rtn4ip1 PE=2 SV=2	45.3	1.4e-44
TRINITY_DN1137_c0_g1	sp|Q5IGR7|EXT1B_DANRE	ext1b	Exostosin-1b OS=Danio rerio GN=ext1b PE=2 SV=1	51.5	1.3e-33
TRINITY_DN11385_c0_g1	sp|Q6YD92|SILIC_PETFI	-	Silicatein OS=Petrosia ficiformis PE=1 SV=1	50.6	3.4e-83
TRINITY_DN11391_c0_g1	sp|Q9H3K2|GHITM_HUMAN	GHITM	Growth hormone-inducible transmembrane protein OS=Homo sapiens GN=GHITM PE=1 SV=2	49.8	7.7e-64
TRINITY_DN11394_c0_g1	sp|P05632|ATP5E_BOVIN	ATP5E	ATP synthase subunit epsilon, mitochondrial OS=Bos taurus GN=ATP5E PE=1 SV=4	55.1	3.4e-08
TRINITY_DN11396_c0_g1	sp|Q76I81|RS12_BOVIN	RPS12	40S ribosomal protein S12 OS=Bos taurus GN=RPS12 PE=2 SV=1	75.4	2.3e-24
TRINITY_DN11399_c0_g2	sp|Q8AY73|XPO2_ORENI	cse1l	Exportin-2 OS=Oreochromis niloticus GN=cse1l PE=2 SV=1	57.2	0
TRINITY_DN11404_c0_g1	sp|Q5SPH9|RT10_DANRE	mrps10	Probable 28S ribosomal protein S10, mitochondrial OS=Danio rerio GN=mrps10 PE=3 SV=1	41.6	3.3e-27
TRINITY_DN11424_c0_g1	sp|Q9NRL2|BAZ1A_HUMAN	BAZ1A	Bromodomain adjacent to zinc finger domain protein 1A OS=Homo sapiens GN=BAZ1A PE=1 SV=2	32.2	1.5e-56
TRINITY_DN11429_c0_g1	sp|Q8CA95|PDE10_MOUSE	Pde10a	cAMP and cAMP-inhibited cGMP 3',5'-cyclic phosphodiesterase 10A OS=Mus musculus GN=Pde10a PE=1 SV=2	49.3	2.2e-15
TRINITY_DN11432_c1_g1	sp|Q4VBF2|R3HD4_MOUSE	R3hdm4	R3H domain-containing protein 4 OS=Mus musculus GN=R3hdm4 PE=2 SV=1	44.1	1.5e-07
TRINITY_DN11442_c0_g1	sp|Q9PU58|NIPS2_DANRE	gbas	Protein NipSnap homolog 2 OS=Danio rerio GN=gbas PE=2 SV=2	41.8	4.8e-49
TRINITY_DN11468_c0_g2	sp|Q9D8Z1|ASCC1_MOUSE	Ascc1	Activating signal cointegrator 1 complex subunit 1 OS=Mus musculus GN=Ascc1 PE=1 SV=1	35.3	4.3e-44
TRINITY_DN11484_c0_g1	sp|Q5BJQ7|TADA1_RAT	Tada1	Transcriptional adapter 1 OS=Rattus norvegicus GN=Tada1 PE=2 SV=2	34.4	1.3e-42
TRINITY_DN11487_c0_g3	sp|Q8N1G4|LRC47_HUMAN	LRRC47	Leucine-rich repeat-containing protein 47 OS=Homo sapiens GN=LRRC47 PE=1 SV=1	36	9.8e-31
TRINITY_DN11491_c0_g1	sp|Q6ZHE5|DCYD1_ORYSJ	Os02g0773300	Putative D-cysteine desulfhydrase 1, mitochondrial OS=Oryza sativa subsp. japonica GN=Os02g0773300 PE=2 SV=2	40.7	7.8e-63
TRINITY_DN11505_c0_g1	sp|P00395|COX1_HUMAN	MT-CO1	Cytochrome c oxidase subunit 1 OS=Homo sapiens GN=MT-CO1 PE=1 SV=1	94.3	1.1e-30
TRINITY_DN11506_c0_g1	sp|O18404|HCD2_DROME	scu	3-hydroxyacyl-CoA dehydrogenase type-2 OS=Drosophila melanogaster GN=scu PE=1 SV=1	64.7	3.3e-86
TRINITY_DN11521_c0_g1	sp|E2RDZ6|SIR5_CANLF	SIRT5	NAD-dependent protein deacylase sirtuin-5, mitochondrial OS=Canis lupus familiaris GN=SIRT5 PE=3 SV=1	50.8	2.7e-97
TRINITY_DN11551_c0_g1	sp|P52758|UK114_HUMAN	HRSP12	Ribonuclease UK114 OS=Homo sapiens GN=HRSP12 PE=1 SV=1	64.1	3.3e-42
TRINITY_DN11554_c0_g1	sp|Q05048|CSTF1_HUMAN	CSTF1	Cleavage stimulation factor subunit 1 OS=Homo sapiens GN=CSTF1 PE=1 SV=1	44.2	2.7e-33
TRINITY_DN11555_c0_g3	sp|P03915|NU5M_HUMAN	MT-ND5	NADH-ubiquinone oxidoreductase chain 5 OS=Homo sapiens GN=MT-ND5 PE=1 SV=2	97.2	2.2e-29
TRINITY_DN11555_c0_g5	sp|P03923|NU6M_HUMAN	MT-ND6	NADH-ubiquinone oxidoreductase chain 6 OS=Homo sapiens GN=MT-ND6 PE=1 SV=2	98	8.5e-73
TRINITY_DN11555_c0_g6	sp|P00158|CYB_MOUSE	Mt-Cyb	Cytochrome b OS=Mus musculus GN=Mt-Cyb PE=1 SV=1	92.7	2.9e-188
TRINITY_DN11561_c0_g2	sp|Q9IAK8|TBX5A_DANRE	tbx5a	T-box transcription factor TBX5-A OS=Danio rerio GN=tbx5a PE=2 SV=2	43.8	3.7e-16
TRINITY_DN11583_c0_g1	sp|P36954|RPB9_HUMAN	POLR2I	DNA-directed RNA polymerase II subunit RPB9 OS=Homo sapiens GN=POLR2I PE=1 SV=1	72.1	5.6e-44
TRINITY_DN11591_c0_g2	sp|Q8ISP0|RS18_BRABE	RPS18	40S ribosomal protein S18 OS=Branchiostoma belcheri GN=RPS18 PE=2 SV=1	83.4	6.4e-71
TRINITY_DN11592_c0_g1	sp|Q7ZYS8|RL10A_XENLA	rpl10a	60S ribosomal protein L10a OS=Xenopus laevis GN=rpl10a PE=2 SV=1	53.8	1e-81
TRINITY_DN11593_c0_g1	sp|P09926|SURF2_MOUSE	Surf2	Surfeit locus protein 2 OS=Mus musculus GN=Surf2 PE=1 SV=1	37.5	6e-21
TRINITY_DN1160_c0_g1	sp|P48787|TNNI3_MOUSE	Tnni3	Troponin I, cardiac muscle OS=Mus musculus GN=Tnni3 PE=1 SV=2	100	1.2e-38
TRINITY_DN11620_c0_g1	sp|Q5BIM1|TRI45_BOVIN	TRIM45	Tripartite motif-containing protein 45 OS=Bos taurus GN=TRIM45 PE=2 SV=1	22.7	7.7e-21
TRINITY_DN11626_c0_g1	sp|P41976|SODM_BOVIN	SOD2	Superoxide dismutase [Mn], mitochondrial OS=Bos taurus GN=SOD2 PE=2 SV=1	68	1.1e-83
TRINITY_DN11628_c0_g2	sp|Q4KTG9|RL17_SUBDO	RPL17	60S ribosomal protein L17 OS=Suberites domuncula GN=RPL17 PE=2 SV=1	79.6	1.2e-65
TRINITY_DN11630_c0_g1	sp|Q8JGR4|RL24_DANRE	rpl24	60S ribosomal protein L24 OS=Danio rerio GN=rpl24 PE=2 SV=1	52	3.5e-27
TRINITY_DN11630_c0_g2	sp|Q922V4|PLRG1_MOUSE	Plrg1	Pleiotropic regulator 1 OS=Mus musculus GN=Plrg1 PE=1 SV=1	56.6	1e-50
TRINITY_DN11631_c0_g1	sp|B5X8M4|BRCC3_SALSA	brcc3	Lys-63-specific deubiquitinase BRCC36 OS=Salmo salar GN=brcc3 PE=2 SV=1	48.4	9.3e-60
TRINITY_DN11632_c0_g1	sp|Q3SZZ0|BRX1_BOVIN	BRIX1	Ribosome biogenesis protein BRX1 homolog OS=Bos taurus GN=BRIX1 PE=2 SV=1	68.5	1.9e-58
TRINITY_DN11648_c0_g1	sp|Q6DHL4|SUMO2_DANRE	sumo2	Small ubiquitin-related modifier 2 OS=Danio rerio GN=sumo2 PE=3 SV=1	58.8	1.4e-25
TRINITY_DN11648_c0_g2	sp|Q0VFH6|RM22_XENTR	mrpl22	39S ribosomal protein L22, mitochondrial OS=Xenopus tropicalis GN=mrpl22 PE=2 SV=1	51	3.7e-21
TRINITY_DN11651_c0_g1	sp|A5PJG7|CCHL_BOVIN	HCCS	Cytochrome c-type heme lyase OS=Bos taurus GN=HCCS PE=2 SV=1	71.6	6.7e-32
TRINITY_DN11652_c0_g2	sp|O14618|CCS_HUMAN	CCS	Copper chaperone for superoxide dismutase OS=Homo sapiens GN=CCS PE=1 SV=1	44.1	8.8e-34
TRINITY_DN11660_c0_g1	sp|A4IG59|WASH1_DANRE	Wash1	WAS protein family homolog 1 OS=Danio rerio GN=Wash1 PE=2 SV=2	42.3	1.3e-19
TRINITY_DN11660_c0_g3	sp|Q8VDD8|WASH1_MOUSE	Wash1	WAS protein family homolog 1 OS=Mus musculus GN=Wash1 PE=1 SV=1	55.9	2.6e-30
TRINITY_DN11670_c0_g1	sp|A4QJG0|RR7_AETCO	rps7-A	30S ribosomal protein S7, chloroplastic OS=Aethionema cordifolium GN=rps7-A PE=3 SV=1	100	4e-33
TRINITY_DN11670_c0_g2	sp|A4GYN8|RR12B_POPTR	rps12-B	30S ribosomal protein S12-B, chloroplastic OS=Populus trichocarpa GN=rps12-B PE=3 SV=1	93.2	1.2e-32
TRINITY_DN11670_c0_g3	sp|Q9BBN9|NU1C_LOTJA	ndhA	NAD(P)H-quinone oxidoreductase subunit 1, chloroplastic OS=Lotus japonicus GN=ndhA PE=3 SV=1	85.9	3.2e-28
TRINITY_DN11690_c0_g1	sp|P52159|CNI_DROVI	cni	Protein cornichon OS=Drosophila virilis GN=cni PE=3 SV=2	51.6	2.1e-33
TRINITY_DN11690_c0_g2	sp|P60984|GMFB_BOVIN	GMFB	Glia maturation factor beta OS=Bos taurus GN=GMFB PE=1 SV=2	61.5	1.1e-47
TRINITY_DN11703_c0_g1	sp|P41116|RL8_XENLA	rpl8	60S ribosomal protein L8 OS=Xenopus laevis GN=rpl8 PE=2 SV=3	80.5	4.6e-96
TRINITY_DN11713_c0_g1	sp|Q9U518|ASPG_DIRIM	-	L-asparaginase OS=Dirofilaria immitis PE=1 SV=1	46.2	3.2e-69
TRINITY_DN11727_c0_g1	sp|Q1HQK8|VATF_AEDAE	AAEL002464	V-type proton ATPase subunit F OS=Aedes aegypti GN=AAEL002464 PE=2 SV=1	52.7	3e-07
TRINITY_DN11736_c0_g1	sp|P09813|APOA2_MOUSE	Apoa2	Apolipoprotein A-II OS=Mus musculus GN=Apoa2 PE=1 SV=2	100	9.3e-50
TRINITY_DN11736_c0_g2	sp|P07724|ALBU_MOUSE	Alb	Serum albumin OS=Mus musculus GN=Alb PE=1 SV=3	100	2.9e-216
TRINITY_DN11744_c0_g1	sp|P51181|KPYK_BACLI	pyk	Pyruvate kinase OS=Bacillus licheniformis GN=pyk PE=3 SV=1	31.2	4.7e-47
TRINITY_DN11750_c0_g1	sp|Q5BJU7|WASF1_RAT	Wasf1	Wiskott-Aldrich syndrome protein family member 1 OS=Rattus norvegicus GN=Wasf1 PE=1 SV=1	46	3.3e-37
TRINITY_DN11751_c0_g1	sp|Q6DDA4|SNR27_XENTR	snrnp27	U4/U6.U5 small nuclear ribonucleoprotein 27 kDa protein OS=Xenopus tropicalis GN=snrnp27 PE=2 SV=1	68	7.9e-13
TRINITY_DN11755_c0_g1	sp|Q9SJQ6|ROS1_ARATH	ROS1	Protein ROS1 OS=Arabidopsis thaliana GN=ROS1 PE=1 SV=2	49.2	1.8e-23
TRINITY_DN11759_c0_g1	sp|Q5R698|ANM5_PONAB	PRMT5	Protein arginine N-methyltransferase 5 OS=Pongo abelii GN=PRMT5 PE=2 SV=3	53.4	1.1e-178
TRINITY_DN11763_c0_g1	sp|Q32L94|D42E1_BOVIN	SDR42E1	Short-chain dehydrogenase/reductase family 42E member 1 OS=Bos taurus GN=SDR42E1 PE=2 SV=2	52.8	4e-24
TRINITY_DN11765_c0_g2	sp|A2SLG5|RPOB_METPP	rpoB	DNA-directed RNA polymerase subunit beta OS=Methylibium petroleiphilum (strain ATCC BAA-1232 / LMG 22953 / PM1) GN=rpoB PE=3 SV=1	98.9	4.8e-47
TRINITY_DN11769_c1_g2	sp|P93306|NDUS2_ARATH	NAD7	NADH dehydrogenase [ubiquinone] iron-sulfur protein 2 OS=Arabidopsis thaliana GN=NAD7 PE=1 SV=2	99.4	3.8e-95
TRINITY_DN11782_c0_g1	sp|P30205|WC11_BOVIN	-	Antigen WC1.1 OS=Bos taurus PE=2 SV=1	43.2	4.8e-10
TRINITY_DN1178_c0_g1	sp|Q6DGL6|SOX1A_DANRE	sox1a	Transcription factor Sox-1a OS=Danio rerio GN=sox1a PE=2 SV=2	54.3	3.8e-30
TRINITY_DN11803_c0_g2	sp|C3Y431|DDRGK_BRAFL	BRAFLDRAFT_114851	DDRGK domain-containing protein 1 OS=Branchiostoma floridae GN=BRAFLDRAFT_114851 PE=3 SV=1	73.4	4.4e-32
TRINITY_DN11810_c0_g1	sp|Q73GZ6|RS18_WOLPM	rpsR	30S ribosomal protein S18 OS=Wolbachia pipientis wMel GN=rpsR PE=3 SV=1	51.5	6.1e-09
TRINITY_DN11812_c0_g1	sp|Q95V84|RL38_BRABE	RPL38	60S ribosomal protein L38 OS=Branchiostoma belcheri GN=RPL38 PE=3 SV=1	81.2	4.2e-14
TRINITY_DN11825_c0_g1	sp|P33623|TBA1_ANEPH	TUBA1	Tubulin alpha-1 chain OS=Anemia phyllitidis GN=TUBA1 PE=2 SV=1	100	5.3e-36
TRINITY_DN11833_c0_g1	sp|Q9UG56|PISD_HUMAN	PISD	Phosphatidylserine decarboxylase proenzyme, mitochondrial OS=Homo sapiens GN=PISD PE=2 SV=4	33.2	1.3e-42
TRINITY_DN11840_c1_g1	sp|P56616|UBE2C_XENLA	ube2c	Ubiquitin-conjugating enzyme E2 C OS=Xenopus laevis GN=ube2c PE=1 SV=1	66.5	1.2e-61
TRINITY_DN11843_c0_g1	sp|Q9SJQ9|ALFC6_ARATH	FAB6	Fructose-bisphosphate aldolase 6, cytosolic OS=Arabidopsis thaliana GN=FAB6 PE=1 SV=1	90.7	1.4e-40
TRINITY_DN11843_c0_g2	sp|O65735|ALF_CICAR	ALDC	Fructose-bisphosphate aldolase, cytoplasmic isozyme OS=Cicer arietinum GN=ALDC PE=2 SV=1	94.1	4.3e-29
TRINITY_DN11853_c0_g1	sp|Q9MZF4|DUOX1_CANLF	DUOX1	Dual oxidase 1 OS=Canis lupus familiaris GN=DUOX1 PE=1 SV=1	28.7	1e-09
TRINITY_DN11855_c0_g1	sp|O43719|HTSF1_HUMAN	HTATSF1	HIV Tat-specific factor 1 OS=Homo sapiens GN=HTATSF1 PE=1 SV=1	51.1	4.9e-07
TRINITY_DN11855_c0_g2	sp|Q8BGC0|HTSF1_MOUSE	Htatsf1	HIV Tat-specific factor 1 homolog OS=Mus musculus GN=Htatsf1 PE=1 SV=1	47.2	5.3e-11
TRINITY_DN11855_c0_g3	sp|O43719|HTSF1_HUMAN	HTATSF1	HIV Tat-specific factor 1 OS=Homo sapiens GN=HTATSF1 PE=1 SV=1	48.8	6.1e-34
TRINITY_DN11875_c0_g1	sp|Q5E9S8|CO041_BOVIN	-	Uncharacterized protein C15orf41 homolog OS=Bos taurus PE=2 SV=1	52.4	5.4e-69
TRINITY_DN11879_c0_g1	sp|Q9VL78|FKB59_DROME	FKBP59	FK506-binding protein 59 OS=Drosophila melanogaster GN=FKBP59 PE=1 SV=1	47.1	4.4e-97
TRINITY_DN11881_c0_g2	sp|Q6ZMV9|KIF6_HUMAN	KIF6	Kinesin-like protein KIF6 OS=Homo sapiens GN=KIF6 PE=1 SV=3	25.4	3.8e-15
TRINITY_DN11883_c0_g2	sp|Q6IV76|TAZ_ERYPA	TAZ	Tafazzin OS=Erythrocebus patas GN=TAZ PE=2 SV=1	44.8	1.2e-58
TRINITY_DN11885_c0_g1	sp|Q9BW85|CCD94_HUMAN	CCDC94	Coiled-coil domain-containing protein 94 OS=Homo sapiens GN=CCDC94 PE=1 SV=1	57.9	2.1e-52
TRINITY_DN11893_c0_g1	sp|P30170|ACT10_SOLTU	AC85C	Actin-85C (Fragment) OS=Solanum tuberosum GN=AC85C PE=3 SV=1	100	1.2e-37
TRINITY_DN11893_c0_g2	sp|P20399|ACT2_XENTR	-	Actin, alpha cardiac muscle 2 OS=Xenopus tropicalis PE=2 SV=1	100	3e-52
TRINITY_DN11903_c0_g1	sp|Q6DFR0|TOLIP_XENTR	tollip	Toll-interacting protein OS=Xenopus tropicalis GN=tollip PE=2 SV=1	35.9	4.9e-42
TRINITY_DN11916_c0_g1	sp|Q58EN8|VP33B_DANRE	vps33b	Vacuolar protein sorting-associated protein 33B OS=Danio rerio GN=vps33b PE=2 SV=1	36.2	1.6e-101
TRINITY_DN11918_c0_g1	sp|P50143|TCPG_XENLA	cct3	T-complex protein 1 subunit gamma OS=Xenopus laevis GN=cct3 PE=2 SV=2	74.2	1.9e-226
TRINITY_DN11930_c0_g1	sp|Q8CCJ9|P20L1_MOUSE	Phf20l1	PHD finger protein 20-like protein 1 OS=Mus musculus GN=Phf20l1 PE=1 SV=2	36	3.2e-11
TRINITY_DN1193_c0_g1	sp|A2ASS6|TITIN_MOUSE	Ttn	Titin OS=Mus musculus GN=Ttn PE=1 SV=1	100	2.3e-36
TRINITY_DN11951_c0_g1	sp|Q0V9S9|DRC7_XENTR	drc7	Dynein regulatory complex subunit 7 OS=Xenopus tropicalis GN=drc7 PE=2 SV=1	48.9	1.6e-42
TRINITY_DN11954_c0_g1	sp|P31167|ADT1_ARATH	AAC1	ADP,ATP carrier protein 1, mitochondrial OS=Arabidopsis thaliana GN=AAC1 PE=1 SV=2	100	3.6e-34
TRINITY_DN11956_c0_g1	sp|P49427|UB2R1_HUMAN	CDC34	Ubiquitin-conjugating enzyme E2 R1 OS=Homo sapiens GN=CDC34 PE=1 SV=2	64.2	3.4e-58
TRINITY_DN11963_c0_g2	sp|Q9Y256|FACE2_HUMAN	RCE1	CAAX prenyl protease 2 OS=Homo sapiens GN=RCE1 PE=1 SV=1	37.7	5.7e-48
TRINITY_DN11964_c0_g1	sp|Q9QYJ3|DNJB1_MOUSE	Dnajb1	DnaJ homolog subfamily B member 1 OS=Mus musculus GN=Dnajb1 PE=1 SV=3	67	7.5e-30
TRINITY_DN11966_c0_g1	sp|Q5J907|TCTP_ELAGV	TCTP	Translationally-controlled tumor protein homolog OS=Elaeis guineensis var. tenera GN=TCTP PE=2 SV=1	92	1.8e-38
TRINITY_DN11970_c0_g1	sp|P17244|G3P_CRIGR	GAPDH	Glyceraldehyde-3-phosphate dehydrogenase OS=Cricetulus griseus GN=GAPDH PE=2 SV=2	59.4	9.4e-131
TRINITY_DN11971_c0_g3	sp|P92514|COX3_ARATH	COX3	Cytochrome c oxidase subunit 3 OS=Arabidopsis thaliana GN=COX3 PE=2 SV=2	98.9	1.8e-152
TRINITY_DN11985_c0_g1	sp|P33316|DUT_HUMAN	DUT	Deoxyuridine 5'-triphosphate nucleotidohydrolase, mitochondrial OS=Homo sapiens GN=DUT PE=1 SV=4	70.7	1e-51
TRINITY_DN11991_c0_g1	sp|Q6P7B0|SYWC_RAT	Wars	Tryptophan--tRNA ligase, cytoplasmic OS=Rattus norvegicus GN=Wars PE=1 SV=2	70.8	6.9e-165
TRINITY_DN11992_c0_g1	sp|P60122|RUVB1_MOUSE	Ruvbl1	RuvB-like 1 OS=Mus musculus GN=Ruvbl1 PE=1 SV=1	83.6	2.2e-218
TRINITY_DN11997_c0_g1	sp|P49406|RM19_HUMAN	MRPL19	39S ribosomal protein L19, mitochondrial OS=Homo sapiens GN=MRPL19 PE=1 SV=2	46.5	1.7e-19
TRINITY_DN11998_c0_g1	sp|P57093|PAHX_RAT	Phyh	Phytanoyl-CoA dioxygenase, peroxisomal OS=Rattus norvegicus GN=Phyh PE=1 SV=2	61.3	9.5e-120
TRINITY_DN11_c0_g1	sp|P18537|FRIZ_DROME	fz	Frizzled OS=Drosophila melanogaster GN=fz PE=1 SV=1	27.5	7.8e-07
TRINITY_DN12012_c0_g1	sp|Q9VC49|RPAB5_DROME	Rpb10	DNA-directed RNA polymerases I, II, and III subunit RPABC5 OS=Drosophila melanogaster GN=Rpb10 PE=3 SV=1	98.4	2e-32
TRINITY_DN12012_c0_g3	sp|Q28F07|ANM1_XENTR	prmt1	Protein arginine N-methyltransferase 1 OS=Xenopus tropicalis GN=prmt1 PE=2 SV=1	64.9	1.9e-132
TRINITY_DN12028_c0_g1	sp|P84875|PCPI_SABMA	-	Carboxypeptidase inhibitor SmCI OS=Sabellastarte magnifica PE=1 SV=1	43.7	1.1e-39
TRINITY_DN12033_c0_g1	sp|Q15427|SF3B4_HUMAN	SF3B4	Splicing factor 3B subunit 4 OS=Homo sapiens GN=SF3B4 PE=1 SV=1	85.5	1.4e-104
TRINITY_DN12042_c0_g1	sp|Q6AYD3|PA2G4_RAT	Pa2g4	Proliferation-associated protein 2G4 OS=Rattus norvegicus GN=Pa2g4 PE=1 SV=1	61.1	2.1e-124
TRINITY_DN12051_c0_g1	sp|Q9HG01|GRP78_PICAN	BiP	78 kDa glucose-regulated protein homolog OS=Pichia angusta GN=BiP PE=3 SV=1	31.9	3.9e-44
TRINITY_DN12068_c0_g1	sp|Q63068|PHAX_RAT	Phax	Phosphorylated adapter RNA export protein OS=Rattus norvegicus GN=Phax PE=1 SV=2	31.2	7.7e-13
TRINITY_DN12079_c0_g1	sp|Q05AU4|MMG1B_XENLA	mmgt1-b	Membrane magnesium transporter 1-B OS=Xenopus laevis GN=mmgt1-b PE=2 SV=1	42.4	3.5e-16
TRINITY_DN1207_c0_g1	sp|Q5SRE7|PHYD1_HUMAN	PHYHD1	Phytanoyl-CoA dioxygenase domain-containing protein 1 OS=Homo sapiens GN=PHYHD1 PE=1 SV=2	51.9	2.5e-84
TRINITY_DN12083_c0_g1	sp|O95295|SNAPN_HUMAN	SNAPIN	SNARE-associated protein Snapin OS=Homo sapiens GN=SNAPIN PE=1 SV=1	50.6	7.9e-15
TRINITY_DN12084_c0_g1	sp|Q28735|TMEDA_RABIT	TMED10	Transmembrane emp24 domain-containing protein 10 OS=Oryctolagus cuniculus GN=TMED10 PE=1 SV=1	64.6	1.1e-66
TRINITY_DN12086_c0_g1	sp|Q9NZC3|GDE1_HUMAN	GDE1	Glycerophosphodiester phosphodiesterase 1 OS=Homo sapiens GN=GDE1 PE=1 SV=1	34	1.5e-43
TRINITY_DN12104_c0_g1	sp|P0CB38|PAB4L_HUMAN	PABPC4L	Polyadenylate-binding protein 4-like OS=Homo sapiens GN=PABPC4L PE=2 SV=1	26.5	2.6e-07
TRINITY_DN12106_c1_g1	sp|Q7SXR3|MAEA_DANRE	maea	Macrophage erythroblast attacher OS=Danio rerio GN=maea PE=2 SV=2	44.4	2.4e-99
TRINITY_DN12108_c0_g1	sp|P0C6T2|OST4_HUMAN	OST4	Dolichyl-diphosphooligosaccharide--protein glycosyltransferase subunit 4 OS=Homo sapiens GN=OST4 PE=1 SV=1	88.2	6.8e-09
TRINITY_DN12110_c0_g1	sp|P39210|MPV17_HUMAN	MPV17	Protein Mpv17 OS=Homo sapiens GN=MPV17 PE=1 SV=1	45.1	5.4e-39
TRINITY_DN12114_c0_g1	sp|Q39044|VPEB_ARATH	bVPE	Vacuolar-processing enzyme beta-isozyme OS=Arabidopsis thaliana GN=bVPE PE=2 SV=3	69	2.1e-27
TRINITY_DN12119_c0_g1	sp|P49585|PCY1A_HUMAN	PCYT1A	Choline-phosphate cytidylyltransferase A OS=Homo sapiens GN=PCYT1A PE=1 SV=2	68.6	6.2e-73
TRINITY_DN12119_c0_g2	sp|B7P877|NCBP2_IXOSC	Cbp20	Nuclear cap-binding protein subunit 2 OS=Ixodes scapularis GN=Cbp20 PE=3 SV=1	69.4	2.3e-47
TRINITY_DN12121_c0_g1	sp|A8QW39|F183A_BOVIN	FAM183A	Protein FAM183A OS=Bos taurus GN=FAM183A PE=2 SV=1	41.9	7.5e-19
TRINITY_DN12122_c0_g1	sp|Q9CWQ0|DPH5_MOUSE	Dph5	Diphthine methyl ester synthase OS=Mus musculus GN=Dph5 PE=1 SV=2	68.1	4.5e-101
TRINITY_DN12124_c0_g1	sp|B3SP85|GILT_PIG	IFI30	Gamma-interferon-inducible-lysosomal thiol reductase OS=Sus scrofa GN=IFI30 PE=2 SV=1	35.8	1.5e-23
TRINITY_DN12125_c0_g1	sp|P70102|MCA3_CRIGR	EEF1E1	Eukaryotic translation elongation factor 1 epsilon-1 OS=Cricetulus griseus GN=EEF1E1 PE=2 SV=1	38.9	6.7e-18
TRINITY_DN12127_c0_g1	sp|O75391|SPAG7_HUMAN	SPAG7	Sperm-associated antigen 7 OS=Homo sapiens GN=SPAG7 PE=1 SV=2	30.7	4.6e-25
TRINITY_DN12141_c0_g1	sp|Q8C5N5|PDD2L_MOUSE	Pdcd2l	Programmed cell death protein 2-like OS=Mus musculus GN=Pdcd2l PE=1 SV=1	53.4	1.5e-15
TRINITY_DN12148_c0_g1	sp|A0QXD8|ELTD_MYCS2	eltD	Erythritol/L-threitol dehydrogenase OS=Mycobacterium smegmatis (strain ATCC 700084 / mc(2)155) GN=eltD PE=1 SV=1	52.5	6.5e-117
TRINITY_DN12161_c0_g1	sp|Q8NHX9|TPC2_HUMAN	TPCN2	Two pore calcium channel protein 2 OS=Homo sapiens GN=TPCN2 PE=1 SV=2	38.5	7.7e-118
TRINITY_DN12163_c0_g1	sp|P52899|ODPA_CAEEL	T05H10.6	Probable pyruvate dehydrogenase E1 component subunit alpha, mitochondrial OS=Caenorhabditis elegans GN=T05H10.6 PE=3 SV=1	58.4	1e-121
TRINITY_DN12166_c0_g1	sp|Q2TBU3|GOSR1_BOVIN	GOSR1	Golgi SNAP receptor complex member 1 OS=Bos taurus GN=GOSR1 PE=2 SV=1	48.9	1.2e-15
TRINITY_DN12171_c0_g1	sp|Q3MHP1|UB2L3_BOVIN	UBE2L3	Ubiquitin-conjugating enzyme E2 L3 OS=Bos taurus GN=UBE2L3 PE=2 SV=1	75.7	4.2e-67
TRINITY_DN12192_c0_g1	sp|Q3ULD5|MCCB_MOUSE	Mccc2	Methylcrotonoyl-CoA carboxylase beta chain, mitochondrial OS=Mus musculus GN=Mccc2 PE=1 SV=1	68.4	2.7e-223
TRINITY_DN12197_c0_g1	sp|Q5ZK35|MET14_CHICK	METTL14	N6-adenosine-methyltransferase subunit METTL14 OS=Gallus gallus GN=METTL14 PE=2 SV=1	66	2.9e-102
TRINITY_DN12206_c0_g1	sp|Q03529|SCS7_YEAST	SCS7	Ceramide very long chain fatty acid hydroxylase SCS7 OS=Saccharomyces cerevisiae (strain ATCC 204508 / S288c) GN=SCS7 PE=1 SV=1	40.4	3.2e-13
TRINITY_DN12206_c0_g2	sp|Q2LAM0|FA2H_RAT	Fa2h	Fatty acid 2-hydroxylase OS=Rattus norvegicus GN=Fa2h PE=1 SV=2	44.1	1.4e-61
TRINITY_DN12213_c0_g1	sp|P23588|IF4B_HUMAN	EIF4B	Eukaryotic translation initiation factor 4B OS=Homo sapiens GN=EIF4B PE=1 SV=2	42.7	8.8e-22
TRINITY_DN12214_c0_g1	sp|P47758|SRPRB_MOUSE	Srprb	Signal recognition particle receptor subunit beta OS=Mus musculus GN=Srprb PE=1 SV=1	37.2	5.2e-39
TRINITY_DN12221_c0_g1	sp|Q9D2H2|KAD7_MOUSE	Ak7	Adenylate kinase 7 OS=Mus musculus GN=Ak7 PE=1 SV=1	46.8	2.5e-72
TRINITY_DN12224_c0_g2	sp|Q5U374|KLH12_DANRE	klhl12	Kelch-like protein 12 OS=Danio rerio GN=klhl12 PE=2 SV=2	40.2	2.4e-71
TRINITY_DN12225_c0_g1	sp|P61028|RAB8B_MOUSE	Rab8b	Ras-related protein Rab-8B OS=Mus musculus GN=Rab8b PE=1 SV=1	54.6	5.2e-56
TRINITY_DN12234_c0_g3	sp|Q9CZY3|UB2V1_MOUSE	Ube2v1	Ubiquitin-conjugating enzyme E2 variant 1 OS=Mus musculus GN=Ube2v1 PE=1 SV=1	69.7	2.1e-33
TRINITY_DN12246_c0_g1	sp|Q13887|KLF5_HUMAN	KLF5	Krueppel-like factor 5 OS=Homo sapiens GN=KLF5 PE=1 SV=2	52	3.2e-08
TRINITY_DN12247_c0_g1	sp|Q8N6M0|OTU6B_HUMAN	OTUD6B	OTU domain-containing protein 6B OS=Homo sapiens GN=OTUD6B PE=1 SV=1	40.4	2.4e-47
TRINITY_DN12258_c0_g1	sp|Q0KIA2|Y9801_DROME	CG9801	PP2C-like domain-containing protein CG9801 OS=Drosophila melanogaster GN=CG9801 PE=2 SV=1	27	1.8e-32
TRINITY_DN12269_c0_g1	sp|Q7M456|RNOY_CRAGI	-	Ribonuclease Oy OS=Crassostrea gigas PE=1 SV=1	36.3	3.5e-14
TRINITY_DN12271_c0_g1	sp|Q52LA3|LIN52_HUMAN	LIN52	Protein lin-52 homolog OS=Homo sapiens GN=LIN52 PE=1 SV=1	43.6	2.3e-18
TRINITY_DN12277_c0_g1	sp|Q9HDC9|APMAP_HUMAN	APMAP	Adipocyte plasma membrane-associated protein OS=Homo sapiens GN=APMAP PE=1 SV=2	35	3.3e-57
TRINITY_DN12284_c0_g1	sp|Q9JK41|COPT1_RAT	Slc31a1	High affinity copper uptake protein 1 OS=Rattus norvegicus GN=Slc31a1 PE=2 SV=1	40.6	8.5e-14
TRINITY_DN12285_c0_g1	sp|P15357|RS27A_DROME	RpS27A	Ubiquitin-40S ribosomal protein S27a OS=Drosophila melanogaster GN=RpS27A PE=1 SV=2	76.1	2e-61
TRINITY_DN12290_c0_g1	sp|Q9VCC3|RT24_DROME	mRpS24	28S ribosomal protein S24, mitochondrial OS=Drosophila melanogaster GN=mRpS24 PE=3 SV=1	50.3	3e-35
TRINITY_DN12292_c0_g3	sp|P10394|POL4_DROME	POL	Retrovirus-related Pol polyprotein from transposon 412 OS=Drosophila melanogaster GN=POL PE=3 SV=1	35.3	1.1e-16
TRINITY_DN12297_c0_g1	sp|Q561X0|NEPR1_DANRE	cnep1r1	Nuclear envelope phosphatase-regulatory subunit 1 OS=Danio rerio GN=cnep1r1 PE=2 SV=1	42.3	4.1e-18
TRINITY_DN12297_c0_g2	sp|O60812|HNRC1_HUMAN	HNRNPCL1	Heterogeneous nuclear ribonucleoprotein C-like 1 OS=Homo sapiens GN=HNRNPCL1 PE=1 SV=1	43.5	1.7e-11
TRINITY_DN12301_c0_g1	sp|Q9AXQ3|IF5A4_SOLLC	-	Eukaryotic translation initiation factor 5A-4 OS=Solanum lycopersicum PE=2 SV=1	98	4.4e-53
TRINITY_DN12302_c0_g1	sp|Q8CG45|ARK72_RAT	Akr7a2	Aflatoxin B1 aldehyde reductase member 2 OS=Rattus norvegicus GN=Akr7a2 PE=1 SV=2	57.3	1.3e-103
TRINITY_DN12310_c0_g1	sp|A1L243|MESD_DANRE	mesdc2	LDLR chaperone MESD OS=Danio rerio GN=mesdc2 PE=2 SV=2	36.9	2.7e-23
TRINITY_DN12313_c0_g1	sp|Q5RFU0|SIAE_PONAB	SIAE	Sialate O-acetylesterase OS=Pongo abelii GN=SIAE PE=2 SV=1	41	7.9e-106
TRINITY_DN12319_c0_g1	sp|P28799|GRN_HUMAN	GRN	Granulins OS=Homo sapiens GN=GRN PE=1 SV=2	45.9	3.7e-33
TRINITY_DN12325_c0_g1	sp|Q5D018|RBM8A_DANRE	rbm8a	RNA-binding protein 8A OS=Danio rerio GN=rbm8a PE=2 SV=1	54.9	1.2e-41
TRINITY_DN12327_c0_g1	sp|P48596|GCH1_DROME	Pu	GTP cyclohydrolase 1 OS=Drosophila melanogaster GN=Pu PE=1 SV=3	61.3	5.9e-58
TRINITY_DN12330_c0_g2	sp|Q99LQ7|TM189_MOUSE	Tmem189	Transmembrane protein 189 OS=Mus musculus GN=Tmem189 PE=1 SV=1	57.1	1.4e-82
TRINITY_DN12333_c0_g1	sp|Q03168|ASPP_AEDAE	AAEL006169	Lysosomal aspartic protease OS=Aedes aegypti GN=AAEL006169 PE=1 SV=2	54.8	2.2e-121
TRINITY_DN12343_c0_g1	sp|A2XRZ0|AKR2_ORYSI	OsI_15387	Probable aldo-keto reductase 2 OS=Oryza sativa subsp. indica GN=OsI_15387 PE=3 SV=1	51.3	1.7e-85
TRINITY_DN12354_c0_g1	sp|Q8R431|MGLL_RAT	Mgll	Monoglyceride lipase OS=Rattus norvegicus GN=Mgll PE=1 SV=1	33	6.8e-42
TRINITY_DN12354_c0_g2	sp|O35678|MGLL_MOUSE	Mgll	Monoglyceride lipase OS=Mus musculus GN=Mgll PE=1 SV=1	37.4	1e-41
TRINITY_DN12363_c0_g1	sp|Q4LDG9|DNAL1_HUMAN	DNAL1	Dynein light chain 1, axonemal OS=Homo sapiens GN=DNAL1 PE=1 SV=1	63.4	1.5e-25
TRINITY_DN12367_c0_g2	sp|Q9Y3C0|CCD53_HUMAN	CCDC53	WASH complex subunit CCDC53 OS=Homo sapiens GN=CCDC53 PE=1 SV=1	59.8	2.4e-27
TRINITY_DN12368_c0_g1	sp|P00516|KGP1_BOVIN	PRKG1	cGMP-dependent protein kinase 1 OS=Bos taurus GN=PRKG1 PE=1 SV=2	55.3	1.5e-24
TRINITY_DN12383_c0_g1	sp|Q16667|CDKN3_HUMAN	CDKN3	Cyclin-dependent kinase inhibitor 3 OS=Homo sapiens GN=CDKN3 PE=1 SV=1	38.9	8.7e-36
TRINITY_DN12383_c0_g4	sp|Q8N9M1|CS047_HUMAN	C19orf47	Uncharacterized protein C19orf47 OS=Homo sapiens GN=C19orf47 PE=1 SV=1	54.9	3.3e-16
TRINITY_DN12383_c0_g6	sp|P49962|SRP09_MOUSE	Srp9	Signal recognition particle 9 kDa protein OS=Mus musculus GN=Srp9 PE=1 SV=2	61.8	1.7e-20
TRINITY_DN12386_c0_g2	sp|Q9D2C9|SNPC3_MOUSE	Snapc3	snRNA-activating protein complex subunit 3 OS=Mus musculus GN=Snapc3 PE=1 SV=2	45.7	1e-37
TRINITY_DN12393_c0_g1	sp|P50991|TCPD_HUMAN	CCT4	T-complex protein 1 subunit delta OS=Homo sapiens GN=CCT4 PE=1 SV=4	78.6	9.8e-63
TRINITY_DN12393_c0_g2	sp|P53451|TCPD_TAKRU	cct4	T-complex protein 1 subunit delta OS=Takifugu rubripes GN=cct4 PE=2 SV=1	72.2	4.4e-144
TRINITY_DN12411_c0_g1	sp|P39963|CCNB3_CHICK	CCNB3	G2/mitotic-specific cyclin-B3 OS=Gallus gallus GN=CCNB3 PE=2 SV=1	47	2.8e-83
TRINITY_DN12413_c0_g2	sp|Q9BV81|EMC6_HUMAN	EMC6	ER membrane protein complex subunit 6 OS=Homo sapiens GN=EMC6 PE=1 SV=1	58.3	4.3e-29
TRINITY_DN12414_c0_g1	sp|Q17NV8|TRET1_AEDAE	Tret1	Facilitated trehalose transporter Tret1 OS=Aedes aegypti GN=Tret1 PE=3 SV=1	31.9	1.3e-63
TRINITY_DN12420_c0_g1	sp|Q7SXL7|FL2D_DANRE	wtap	Pre-mRNA-splicing regulator WTAP OS=Danio rerio GN=wtap PE=2 SV=1	66.7	9.4e-53
TRINITY_DN12424_c0_g1	sp|O16264|PEBPH_CAEEL	F40A3.3	Phosphatidylethanolamine-binding protein homolog F40A3.3 OS=Caenorhabditis elegans GN=F40A3.3 PE=3 SV=1	55.1	6.3e-56
TRINITY_DN12425_c0_g1	sp|Q9HDC9|APMAP_HUMAN	APMAP	Adipocyte plasma membrane-associated protein OS=Homo sapiens GN=APMAP PE=1 SV=2	41.7	6.8e-26
TRINITY_DN12436_c0_g1	sp|Q3BJS3|FOXN3_XENLA	foxn3	Forkhead box protein N3 OS=Xenopus laevis GN=foxn3 PE=2 SV=1	66.7	7e-22
TRINITY_DN12439_c0_g1	sp|Q8BZB2|COAC_MOUSE	Ppcdc	Phosphopantothenoylcysteine decarboxylase OS=Mus musculus GN=Ppcdc PE=1 SV=1	64.4	1.3e-35
TRINITY_DN12440_c0_g1	sp|Q86UC2|RSPH3_HUMAN	RSPH3	Radial spoke head protein 3 homolog OS=Homo sapiens GN=RSPH3 PE=1 SV=1	65.2	1.7e-71
TRINITY_DN12443_c0_g1	sp|B9G3M6|KN7I_ORYSJ	KIN7I	Kinesin-like protein KIN-7I OS=Oryza sativa subsp. japonica GN=KIN7I PE=2 SV=2	46.9	4.4e-48
TRINITY_DN12452_c0_g1	sp|Q0MQ86|NDUAC_GORGO	NDUFA12	NADH dehydrogenase [ubiquinone] 1 alpha subcomplex subunit 12 OS=Gorilla gorilla gorilla GN=NDUFA12 PE=2 SV=1	51.7	3e-28
TRINITY_DN12453_c0_g1	sp|P20023|CR2_HUMAN	CR2	Complement receptor type 2 OS=Homo sapiens GN=CR2 PE=1 SV=2	38.5	1.7e-07
TRINITY_DN12463_c0_g1	sp|P34390|YLS5_CAEEL	F09G8.5	Uncharacterized protein F09G8.5 OS=Caenorhabditis elegans GN=F09G8.5 PE=4 SV=2	40.5	5.6e-18
TRINITY_DN12463_c0_g2	sp|Q9BX74|TM2D1_HUMAN	TM2D1	TM2 domain-containing protein 1 OS=Homo sapiens GN=TM2D1 PE=1 SV=1	47.2	1.6e-34
TRINITY_DN12466_c0_g1	sp|Q96T37|RBM15_HUMAN	RBM15	Putative RNA-binding protein 15 OS=Homo sapiens GN=RBM15 PE=1 SV=2	28.7	8.3e-60
TRINITY_DN12470_c0_g1	sp|Q24JY1|RL23A_BOVIN	RPL23A	60S ribosomal protein L23a OS=Bos taurus GN=RPL23A PE=2 SV=1	89.3	8.2e-37
TRINITY_DN12470_c0_g3	sp|Q9WYG0|Y325_THEMA	TM_0325	Uncharacterized oxidoreductase TM_0325 OS=Thermotoga maritima (strain ATCC 43589 / MSB8 / DSM 3109 / JCM 10099) GN=TM_0325 PE=3 SV=1	33.5	7.3e-11
TRINITY_DN12483_c0_g1	sp|P39023|RL3_HUMAN	RPL3	60S ribosomal protein L3 OS=Homo sapiens GN=RPL3 PE=1 SV=2	60.2	1.1e-156
TRINITY_DN12485_c0_g1	sp|Q91687|ITA4_XENLA	itga4	Integrin alpha-4 OS=Xenopus laevis GN=itga4 PE=2 SV=1	47.1	2.8e-08
TRINITY_DN12487_c0_g1	sp|Q5HZI9|S2551_MOUSE	Slc25a51	Solute carrier family 25 member 51 OS=Mus musculus GN=Slc25a51 PE=1 SV=1	43	3.1e-64
TRINITY_DN12488_c0_g1	sp|Q24JY4|ZNHI1_BOVIN	ZNHIT1	Zinc finger HIT domain-containing protein 1 OS=Bos taurus GN=ZNHIT1 PE=2 SV=1	56.7	5.8e-39
TRINITY_DN12492_c0_g1	sp|O35405|PLD3_MOUSE	Pld3	Phospholipase D3 OS=Mus musculus GN=Pld3 PE=1 SV=1	37.1	1.7e-80
TRINITY_DN12493_c0_g1	sp|P05493|ATPAM_PEA	ATPA	ATP synthase subunit alpha, mitochondrial OS=Pisum sativum GN=ATPA PE=3 SV=2	98.3	6.9e-223
TRINITY_DN12494_c0_g2	sp|A2SLD5|RL36_METPP	rpmJ	50S ribosomal protein L36 OS=Methylibium petroleiphilum (strain ATCC BAA-1232 / LMG 22953 / PM1) GN=rpmJ PE=3 SV=1	97.3	1.5e-13
TRINITY_DN12504_c0_g1	sp|O44451|ODPB_CAEEL	pdhb-1	Pyruvate dehydrogenase E1 component subunit beta, mitochondrial OS=Caenorhabditis elegans GN=pdhb-1 PE=1 SV=2	68.2	3.3e-132
TRINITY_DN1250_c0_g1	sp|P19378|HSP7C_CRIGR	HSPA8	Heat shock cognate 71 kDa protein OS=Cricetulus griseus GN=HSPA8 PE=2 SV=1	98.2	1.6e-44
TRINITY_DN12517_c0_g1	sp|Q6DEE7|FA76B_XENLA	fam76b	Protein FAM76B OS=Xenopus laevis GN=fam76b PE=2 SV=1	56.6	1.8e-25
TRINITY_DN12520_c0_g1	sp|Q1LWJ6|ARPIN_DANRE	arpin	Arpin OS=Danio rerio GN=arpin PE=2 SV=1	38	2.1e-22
TRINITY_DN12520_c0_g3	sp|Q8UUP2|EEDA_XENLA	eed-a	Polycomb protein eed-A OS=Xenopus laevis GN=eed-a PE=1 SV=1	62.7	7.5e-33
TRINITY_DN12529_c0_g3	sp|Q6PC64|ELOV6_DANRE	elovl6	Elongation of very long chain fatty acids protein 6 OS=Danio rerio GN=elovl6 PE=2 SV=1	40.5	1.3e-47
TRINITY_DN12532_c0_g1	sp|Q5RF31|F10A1_PONAB	ST13	Hsc70-interacting protein OS=Pongo abelii GN=ST13 PE=2 SV=1	57.3	3.3e-40
TRINITY_DN12539_c0_g1	sp|Q9WVE9|ITSN1_RAT	Itsn1	Intersectin-1 OS=Rattus norvegicus GN=Itsn1 PE=1 SV=1	28.2	8.8e-18
TRINITY_DN1253_c0_g1	sp|P10160|IF5A1_RABIT	EIF5A	Eukaryotic translation initiation factor 5A-1 OS=Oryctolagus cuniculus GN=EIF5A PE=1 SV=2	71.1	1.8e-61
TRINITY_DN12541_c0_g1	sp|Q8WYH8|ING5_HUMAN	ING5	Inhibitor of growth protein 5 OS=Homo sapiens GN=ING5 PE=1 SV=1	73.8	4.5e-28
TRINITY_DN12541_c0_g2	sp|Q8C3P7|MTA70_MOUSE	Mettl3	N6-adenosine-methyltransferase subunit METTL3 OS=Mus musculus GN=Mettl3 PE=1 SV=2	64.5	8.4e-138
TRINITY_DN12543_c0_g1	sp|P41127|RL131_ARATH	RPL13B	60S ribosomal protein L13-1 OS=Arabidopsis thaliana GN=RPL13B PE=1 SV=1	92.8	1.4e-44
TRINITY_DN12547_c0_g1	sp|Q290X1|SWET1_DROPS	slv	Sugar transporter SWEET1 OS=Drosophila pseudoobscura pseudoobscura GN=slv PE=3 SV=1	39.3	1.4e-33
TRINITY_DN12550_c0_g1	sp|Q3MHN0|PSB6_BOVIN	PSMB6	Proteasome subunit beta type-6 OS=Bos taurus GN=PSMB6 PE=1 SV=1	65.6	1.5e-77
TRINITY_DN12552_c0_g1	sp|Q9LMX4|PPA1_ARATH	PAP1	Probable inactive purple acid phosphatase 1 OS=Arabidopsis thaliana GN=PAP1 PE=2 SV=1	42.9	8.7e-71
TRINITY_DN12553_c0_g1	sp|Q8IVL5|P3H2_HUMAN	P3H2	Prolyl 3-hydroxylase 2 OS=Homo sapiens GN=P3H2 PE=1 SV=1	54	3.5e-46
TRINITY_DN12553_c0_g2	sp|Q9CYD3|CRTAP_MOUSE	Crtap	Cartilage-associated protein OS=Mus musculus GN=Crtap PE=1 SV=3	25.6	2.1e-32
TRINITY_DN12555_c0_g1	sp|Q9GZP9|DERL2_HUMAN	DERL2	Derlin-2 OS=Homo sapiens GN=DERL2 PE=1 SV=1	36.2	2.6e-45
TRINITY_DN12558_c0_g1	sp|Q8L7W2|NUDT8_ARATH	NUDT8	Nudix hydrolase 8 OS=Arabidopsis thaliana GN=NUDT8 PE=2 SV=2	39.2	1.9e-48
TRINITY_DN12559_c0_g1	sp|Q920S3|GATD1_MOUSE	Gatad1	GATA zinc finger domain-containing protein 1 OS=Mus musculus GN=Gatad1 PE=2 SV=2	54.1	2.4e-27
TRINITY_DN12560_c0_g1	sp|Q9BQB6|VKOR1_HUMAN	VKORC1	Vitamin K epoxide reductase complex subunit 1 OS=Homo sapiens GN=VKORC1 PE=1 SV=1	40.4	1.9e-20
TRINITY_DN12571_c1_g2	sp|Q2KHW5|ACBG1_BOVIN	ACSBG1	Long-chain-fatty-acid--CoA ligase ACSBG1 OS=Bos taurus GN=ACSBG1 PE=2 SV=1	46.1	1.8e-24
TRINITY_DN12573_c0_g1	sp|Q9Y4G6|TLN2_HUMAN	TLN2	Talin-2 OS=Homo sapiens GN=TLN2 PE=1 SV=4	36	2.9e-67
TRINITY_DN12574_c0_g1	sp|Q4KLF5|BT3L4_XENLA	btf3l4	Transcription factor BTF3 homolog 4 OS=Xenopus laevis GN=btf3l4 PE=2 SV=1	39.2	4.8e-16
TRINITY_DN12574_c0_g2	sp|P09661|RU2A_HUMAN	SNRPA1	U2 small nuclear ribonucleoprotein A' OS=Homo sapiens GN=SNRPA1 PE=1 SV=2	57.3	3.3e-64
TRINITY_DN12581_c0_g1	sp|P35492|HUTH_MOUSE	Hal	Histidine ammonia-lyase OS=Mus musculus GN=Hal PE=1 SV=1	56.5	4.6e-153
TRINITY_DN12584_c1_g1	sp|Q499U4|GAS8_RAT	Gas8	Growth arrest-specific protein 8 OS=Rattus norvegicus GN=Gas8 PE=2 SV=1	53.8	2.2e-15
TRINITY_DN12584_c1_g3	sp|A5D7M3|GAS8_BOVIN	GAS8	Growth arrest-specific protein 8 OS=Bos taurus GN=GAS8 PE=2 SV=1	61.1	7.4e-49
TRINITY_DN12587_c0_g1	sp|O60763|USO1_HUMAN	USO1	General vesicular transport factor p115 OS=Homo sapiens GN=USO1 PE=1 SV=2	44.7	8.6e-168
TRINITY_DN12590_c0_g1	sp|D4A1J4|BDH2_RAT	Bdh2	3-hydroxybutyrate dehydrogenase type 2 OS=Rattus norvegicus GN=Bdh2 PE=3 SV=2	58.8	9.5e-73
TRINITY_DN12591_c0_g1	sp|Q6P8I4|PCNP_MOUSE	Pcnp	PEST proteolytic signal-containing nuclear protein OS=Mus musculus GN=Pcnp PE=1 SV=1	52.1	3.2e-13
TRINITY_DN12596_c0_g1	sp|A3KGZ2|OGFD2_DANRE	ogfod2	2-oxoglutarate and iron-dependent oxygenase domain-containing protein 2 OS=Danio rerio GN=ogfod2 PE=2 SV=1	44.6	8.1e-85
TRINITY_DN12604_c0_g1	sp|Q8QG60|CRY2_CHICK	CRY2	Cryptochrome-2 OS=Gallus gallus GN=CRY2 PE=2 SV=2	43.2	2.7e-119
TRINITY_DN12605_c1_g1	sp|O75177|CREST_HUMAN	SS18L1	Calcium-responsive transactivator OS=Homo sapiens GN=SS18L1 PE=1 SV=2	64.4	1.5e-13
TRINITY_DN12607_c0_g2	sp|A4QNN3|UBP30_XENTR	usp30	Ubiquitin carboxyl-terminal hydrolase 30 OS=Xenopus tropicalis GN=usp30 PE=2 SV=1	35	5.5e-09
TRINITY_DN12611_c0_g1	sp|A1A4K8|U2AF1_BOVIN	U2AF1	Splicing factor U2AF 35 kDa subunit OS=Bos taurus GN=U2AF1 PE=2 SV=1	76.1	7.4e-46
TRINITY_DN12611_c0_g2	sp|Q4KTC0|RS21_SUBDO	RPS21	40S ribosomal protein S21 OS=Suberites domuncula GN=RPS21 PE=3 SV=1	65.4	7e-28
TRINITY_DN12618_c0_g1	sp|P24140|GPT_CRIGR	DPAGT1	UDP-N-acetylglucosamine--dolichyl-phosphate N-acetylglucosaminephosphotransferase OS=Cricetulus griseus GN=DPAGT1 PE=2 SV=1	55.2	2.1e-121
TRINITY_DN12625_c0_g1	sp|A3KG59|P20D2_MOUSE	Pm20d2	Peptidase M20 domain-containing protein 2 OS=Mus musculus GN=Pm20d2 PE=1 SV=1	51.4	2.9e-12
TRINITY_DN12625_c0_g2	sp|A3KG59|P20D2_MOUSE	Pm20d2	Peptidase M20 domain-containing protein 2 OS=Mus musculus GN=Pm20d2 PE=1 SV=1	49.5	6.5e-91
TRINITY_DN12628_c0_g1	sp|Q8N0N3|BGBP_PENMO	-	Beta-1,3-glucan-binding protein OS=Penaeus monodon PE=2 SV=1	44.9	2.6e-80
TRINITY_DN12628_c0_g2	sp|Q8N0N3|BGBP_PENMO	-	Beta-1,3-glucan-binding protein OS=Penaeus monodon PE=2 SV=1	45.4	1.3e-78
TRINITY_DN12631_c0_g2	sp|Q9NZM5|GSCR2_HUMAN	GLTSCR2	Glioma tumor suppressor candidate region gene 2 protein OS=Homo sapiens GN=GLTSCR2 PE=1 SV=2	30.2	3.9e-32
TRINITY_DN12632_c0_g1	sp|E1BMN8|NLK_BOVIN	NLK	Serine/threonine-protein kinase NLK OS=Bos taurus GN=NLK PE=3 SV=2	46.1	1.4e-100
TRINITY_DN12640_c0_g1	sp|Q5M9P8|ARL6_DANRE	arl6	ADP-ribosylation factor-like protein 6 OS=Danio rerio GN=arl6 PE=2 SV=1	53.2	1.1e-09
TRINITY_DN12649_c0_g1	sp|O95428|PPN_HUMAN	PAPLN	Papilin OS=Homo sapiens GN=PAPLN PE=2 SV=4	27.1	1.8e-48
TRINITY_DN12657_c0_g1	sp|Q9NXS3|KLH28_HUMAN	KLHL28	Kelch-like protein 28 OS=Homo sapiens GN=KLHL28 PE=2 SV=2	30.9	1.2e-48
TRINITY_DN12661_c0_g2	sp|Q9CQ89|CUTA_MOUSE	Cuta	Protein CutA OS=Mus musculus GN=Cuta PE=1 SV=3	55.4	2.7e-27
TRINITY_DN12665_c0_g3	sp|Q7ZWY2|PIHD1_XENLA	pih1d1	PIH1 domain-containing protein 1 OS=Xenopus laevis GN=pih1d1 PE=2 SV=1	31.7	5.4e-06
TRINITY_DN12666_c0_g1	sp|Q3SWZ6|SBDS_BOVIN	SBDS	Ribosome maturation protein SBDS OS=Bos taurus GN=SBDS PE=2 SV=1	82.2	9.2e-68
TRINITY_DN12673_c0_g1	sp|D4B5F9|PGDA_ARTBC	ARB_03699	Probable peptidoglycan-N-acetylglucosamine deacetylase ARB_03699 OS=Arthroderma benhamiae (strain ATCC MYA-4681 / CBS 112371) GN=ARB_03699 PE=1 SV=2	39.6	4.6e-39
TRINITY_DN12676_c0_g1	sp|Q15006|EMC2_HUMAN	EMC2	ER membrane protein complex subunit 2 OS=Homo sapiens GN=EMC2 PE=1 SV=1	48.3	2.7e-68
TRINITY_DN12680_c0_g1	sp|Q651J5|PHO13_ORYSJ	PHO1-3	Phosphate transporter PHO1-3 OS=Oryza sativa subsp. japonica GN=PHO1-3 PE=2 SV=1	25.2	7.9e-30
TRINITY_DN12689_c0_g2	sp|Q3T0T7|SAR1B_BOVIN	SAR1B	GTP-binding protein SAR1b OS=Bos taurus GN=SAR1B PE=2 SV=1	71.1	4.6e-28
TRINITY_DN12693_c0_g1	sp|Q9Y6J8|STYL1_HUMAN	STYXL1	Serine/threonine/tyrosine-interacting-like protein 1 OS=Homo sapiens GN=STYXL1 PE=2 SV=1	32.7	6.1e-43
TRINITY_DN12709_c0_g1	sp|Q08DH8|XRCC3_BOVIN	XRCC3	DNA repair protein XRCC3 OS=Bos taurus GN=XRCC3 PE=2 SV=1	43.2	7.7e-54
TRINITY_DN12709_c0_g2	sp|Q9JI99|SGPP1_MOUSE	Sgpp1	Sphingosine-1-phosphate phosphatase 1 OS=Mus musculus GN=Sgpp1 PE=1 SV=1	36.6	3.5e-50
TRINITY_DN12714_c0_g1	sp|Q6B9X6|VWKA_DICDI	vwkA	Alpha-protein kinase vwkA OS=Dictyostelium discoideum GN=vwkA PE=1 SV=1	34.1	1.1e-16
TRINITY_DN12720_c0_g1	sp|Q9CYH2|F213A_MOUSE	Fam213a	Redox-regulatory protein FAM213A OS=Mus musculus GN=Fam213a PE=1 SV=2	45.3	3.4e-43
TRINITY_DN12721_c0_g1	sp|Q9Y394|DHRS7_HUMAN	DHRS7	Dehydrogenase/reductase SDR family member 7 OS=Homo sapiens GN=DHRS7 PE=1 SV=1	45.7	2e-52
TRINITY_DN12726_c0_g2	sp|Q93134|GBLP_BIOGL	-	Guanine nucleotide-binding protein subunit beta-2-like 1 OS=Biomphalaria glabrata PE=2 SV=1	80.6	2.3e-129
TRINITY_DN12726_c0_g4	sp|Q3T0F2|TPPC2_BOVIN	TRAPPC2	Trafficking protein particle complex subunit 2 OS=Bos taurus GN=TRAPPC2 PE=2 SV=1	51.2	1.4e-18
TRINITY_DN12727_c0_g1	sp|O23755|EF2_BETVU	-	Elongation factor 2 OS=Beta vulgaris PE=2 SV=1	97.2	1.2e-34
TRINITY_DN12727_c0_g2	sp|O23755|EF2_BETVU	-	Elongation factor 2 OS=Beta vulgaris PE=2 SV=1	90.9	6.4e-37
TRINITY_DN12728_c0_g1	sp|O57590|SURF4_TAKRU	surf4	Surfeit locus protein 4 OS=Takifugu rubripes GN=surf4 PE=3 SV=1	59.1	5.7e-84
TRINITY_DN12732_c0_g1	sp|Q4V7B5|CC105_RAT	Ccdc105	Coiled-coil domain-containing protein 105 OS=Rattus norvegicus GN=Ccdc105 PE=1 SV=1	29.2	2e-30
TRINITY_DN12736_c0_g2	sp|Q9WV18|GABR1_MOUSE	Gabbr1	Gamma-aminobutyric acid type B receptor subunit 1 OS=Mus musculus GN=Gabbr1 PE=1 SV=1	23.3	1.8e-13
TRINITY_DN12743_c0_g1	sp|Q9SS98|OLEO5_ARATH	At3g01570	Oleosin 5 OS=Arabidopsis thaliana GN=At3g01570 PE=2 SV=1	52.9	2.3e-15
TRINITY_DN12744_c0_g1	sp|Q96QS3|ARX_HUMAN	ARX	Homeobox protein ARX OS=Homo sapiens GN=ARX PE=1 SV=1	81.7	2.8e-26
TRINITY_DN12745_c0_g1	sp|P85172|IBB1_LUPAL	-	Bowman-Birk type proteinase inhibitor OS=Lupinus albus PE=1 SV=1	80.8	7.9e-07
TRINITY_DN12746_c0_g2	sp|Q2TAW0|CNDG2_XENLA	ncapg2	Condensin-2 complex subunit G2 OS=Xenopus laevis GN=ncapg2 PE=1 SV=1	35.6	7.5e-103
TRINITY_DN12748_c0_g1	sp|P09439|LOX2_SOYBN	LOX1.2	Seed linoleate 9S-lipoxygenase-2 OS=Glycine max GN=LOX1.2 PE=2 SV=1	88.8	8.4e-57
TRINITY_DN12748_c0_g2	sp|P14856|LOX2_PEA	LOX1.2	Seed linoleate 9S-lipoxygenase-2 OS=Pisum sativum GN=LOX1.2 PE=2 SV=1	90.3	1.7e-31
TRINITY_DN12748_c0_g3	sp|P14856|LOX2_PEA	LOX1.2	Seed linoleate 9S-lipoxygenase-2 OS=Pisum sativum GN=LOX1.2 PE=2 SV=1	85.4	5.4e-72
TRINITY_DN12748_c0_g4	sp|P14856|LOX2_PEA	LOX1.2	Seed linoleate 9S-lipoxygenase-2 OS=Pisum sativum GN=LOX1.2 PE=2 SV=1	83.3	1.5e-39
TRINITY_DN12748_c0_g5	sp|P09439|LOX2_SOYBN	LOX1.2	Seed linoleate 9S-lipoxygenase-2 OS=Glycine max GN=LOX1.2 PE=2 SV=1	83.4	4.7e-135
TRINITY_DN12750_c0_g2	sp|P05500|ATP6_OENBE	ATP6	ATP synthase subunit a OS=Oenothera berteroana GN=ATP6 PE=2 SV=2	90.4	4e-119
TRINITY_DN12750_c0_g5	sp|P29757|CYB_SOLTU	MT-CYB	Cytochrome b OS=Solanum tuberosum GN=MT-CYB PE=1 SV=4	98.4	7.5e-227
TRINITY_DN12750_c0_g9	sp|A4QJA0|ATPA_AETCO	atpA	ATP synthase subunit alpha, chloroplastic OS=Aethionema cordifolium GN=atpA PE=3 SV=1	100	9.2e-56
TRINITY_DN12752_c0_g1	sp|P32321|DCTD_HUMAN	DCTD	Deoxycytidylate deaminase OS=Homo sapiens GN=DCTD PE=1 SV=2	37.9	8.1e-28
TRINITY_DN12755_c1_g5	sp|Q0IH40|DNLZ_XENLA	dnlz	DNL-type zinc finger protein OS=Xenopus laevis GN=dnlz PE=2 SV=1	65.9	3.1e-12
TRINITY_DN12756_c0_g1	sp|Q4JHE1|OXLA_PSEAU	-	L-amino-acid oxidase OS=Pseudechis australis PE=1 SV=1	41.3	2.7e-19
TRINITY_DN12766_c0_g1	sp|Q2KIU0|VTI1B_BOVIN	VTI1B	Vesicle transport through interaction with t-SNAREs homolog 1B OS=Bos taurus GN=VTI1B PE=2 SV=1	30.6	3.4e-11
TRINITY_DN12767_c0_g1	sp|P84048|H4_ACRAS	His4	Histone H4 OS=Acrolepiopsis assectella GN=His4 PE=3 SV=2	100	5.3e-43
TRINITY_DN12768_c0_g1	sp|B6NXD5|BRE_BRAFL	BRE	BRCA1-A complex subunit BRE OS=Branchiostoma floridae GN=BRE PE=3 SV=1	35.8	4.4e-47
TRINITY_DN12771_c0_g1	sp|Q16204|CCDC6_HUMAN	CCDC6	Coiled-coil domain-containing protein 6 OS=Homo sapiens GN=CCDC6 PE=1 SV=2	67.1	7.7e-27
TRINITY_DN12774_c0_g3	sp|Q04064|OMP_BORPE	BP0840	Outer membrane porin protein BP0840 OS=Bordetella pertussis (strain Tohama I / ATCC BAA-589 / NCTC 13251) GN=BP0840 PE=1 SV=1	46.5	2.4e-11
TRINITY_DN12776_c0_g1	sp|P32320|CDD_HUMAN	CDA	Cytidine deaminase OS=Homo sapiens GN=CDA PE=1 SV=2	60.3	3.6e-33
TRINITY_DN12778_c0_g1	sp|Q8K2T8|PAF1_MOUSE	Paf1	RNA polymerase II-associated factor 1 homolog OS=Mus musculus GN=Paf1 PE=1 SV=1	60.1	1.8e-88
TRINITY_DN12778_c0_g2	sp|Q4U0S5|PAF1_DANRE	paf1	RNA polymerase II-associated factor 1 homolog OS=Danio rerio GN=paf1 PE=1 SV=1	58.5	3.2e-11
TRINITY_DN12783_c0_g2	sp|P0A9G7|ACEA_ECOL6	aceA	Isocitrate lyase OS=Escherichia coli O6:H1 (strain CFT073 / ATCC 700928 / UPEC) GN=aceA PE=3 SV=1	64.4	3.7e-28
TRINITY_DN12783_c0_g3	sp|P51066|ACEA_SALTY	aceA	Isocitrate lyase OS=Salmonella typhimurium (strain LT2 / SGSC1412 / ATCC 700720) GN=aceA PE=3 SV=2	77	9.2e-55
TRINITY_DN12786_c0_g1	sp|Q7TQ95|LNP_MOUSE	Lnp	Protein lunapark OS=Mus musculus GN=Lnp PE=1 SV=1	37.7	7.5e-40
TRINITY_DN12794_c0_g2	sp|Q6P1R4|DUS1L_HUMAN	DUS1L	tRNA-dihydrouridine(16/17) synthase [NAD(P)(+)]-like OS=Homo sapiens GN=DUS1L PE=1 SV=1	69.3	3.6e-126
TRINITY_DN12797_c0_g1	sp|A2BGU9|SERHL_DANRE	serhl	Serine hydrolase-like protein OS=Danio rerio GN=serhl PE=2 SV=1	36.5	2.4e-45
TRINITY_DN12799_c0_g3	sp|Q9SAC9|AP1M1_ARATH	AP1M1	AP-1 complex subunit mu-1 OS=Arabidopsis thaliana GN=AP1M1 PE=3 SV=1	27.6	1.1e-16
TRINITY_DN12800_c0_g1	sp|Q750R7|ERFB_ASHGO	ERF2	Palmitoyltransferase ERF2 OS=Ashbya gossypii (strain ATCC 10895 / CBS 109.51 / FGSC 9923 / NRRL Y-1056) GN=ERF2 PE=3 SV=1	33.1	1.4e-12
TRINITY_DN12806_c2_g1	sp|Q642A5|DPOE3_RAT	Pole3	DNA polymerase epsilon subunit 3 OS=Rattus norvegicus GN=Pole3 PE=1 SV=1	69.4	8.3e-32
TRINITY_DN12811_c0_g1	sp|P60604|UB2G2_HUMAN	UBE2G2	Ubiquitin-conjugating enzyme E2 G2 OS=Homo sapiens GN=UBE2G2 PE=1 SV=1	77.2	2.2e-52
TRINITY_DN12816_c0_g1	sp|Q7Z407|CSMD3_HUMAN	CSMD3	CUB and sushi domain-containing protein 3 OS=Homo sapiens GN=CSMD3 PE=2 SV=3	24.7	2.9e-14
TRINITY_DN12817_c0_g1	sp|Q68EV5|CMS1_XENLA	cmss1	Protein CMSS1 OS=Xenopus laevis GN=cmss1 PE=2 SV=1	34.4	2.3e-18
TRINITY_DN12818_c0_g2	sp|Q9CWR2|SMYD3_MOUSE	Smyd3	Histone-lysine N-methyltransferase SMYD3 OS=Mus musculus GN=Smyd3 PE=2 SV=1	28.4	4.9e-36
TRINITY_DN12828_c0_g1	sp|A1L1V4|LOL2B_DANRE	loxl2b	Lysyl oxidase homolog 2B OS=Danio rerio GN=loxl2b PE=2 SV=1	30.7	1.9e-09
TRINITY_DN12832_c0_g1	sp|Q9UH92|MLX_HUMAN	MLX	Max-like protein X OS=Homo sapiens GN=MLX PE=1 SV=2	62.3	2.2e-15
TRINITY_DN12834_c0_g1	sp|Q28EH9|NEMP1_XENTR	nemp1	Nuclear envelope integral membrane protein 1 OS=Xenopus tropicalis GN=nemp1 PE=2 SV=1	34	1e-28
TRINITY_DN12838_c0_g1	sp|Q61103|REQU_MOUSE	Dpf2	Zinc finger protein ubi-d4 OS=Mus musculus GN=Dpf2 PE=1 SV=1	47.2	4.4e-29
TRINITY_DN12840_c0_g1	sp|Q6ZS30|NBEL1_HUMAN	NBEAL1	Neurobeachin-like protein 1 OS=Homo sapiens GN=NBEAL1 PE=2 SV=3	30.1	2.7e-09
TRINITY_DN12843_c0_g1	sp|Q5ZJ54|TCPZ_CHICK	CCT6	T-complex protein 1 subunit zeta OS=Gallus gallus GN=CCT6 PE=1 SV=3	75.3	1.1e-229
TRINITY_DN12845_c1_g1	sp|A9JTS9|PTER_XENTR	pter	Phosphotriesterase-related protein OS=Xenopus tropicalis GN=pter PE=2 SV=1	44	2.2e-91
TRINITY_DN12846_c0_g1	sp|P62998|RAC1_BOVIN	RAC1	Ras-related C3 botulinum toxin substrate 1 OS=Bos taurus GN=RAC1 PE=1 SV=1	56.2	4.2e-51
TRINITY_DN12847_c0_g1	sp|Q4KTE2|RSSA_SUBDO	-	40S ribosomal protein SA OS=Suberites domuncula PE=2 SV=1	64.8	7e-112
TRINITY_DN12850_c0_g1	sp|Q9X9Q7|NSAD_SPHXE	nsaD	2-hydroxychromene-2-carboxylate isomerase OS=Sphingobium xenophagum GN=nsaD PE=1 SV=1	28.4	1.2e-11
TRINITY_DN12851_c0_g1	sp|Q5F201|CFA52_MOUSE	Cfap52	Cilia- and flagella-associated protein 52 OS=Mus musculus GN=Cfap52 PE=1 SV=1	56.1	1.8e-209
TRINITY_DN12851_c0_g2	sp|O94817|ATG12_HUMAN	ATG12	Ubiquitin-like protein ATG12 OS=Homo sapiens GN=ATG12 PE=1 SV=1	39.1	4.1e-14
TRINITY_DN12856_c0_g1	sp|P48463|PP2AA_CHICK	PPP2CA	Serine/threonine-protein phosphatase 2A catalytic subunit alpha isoform OS=Gallus gallus GN=PPP2CA PE=2 SV=1	93	2.3e-86
TRINITY_DN12857_c0_g1	sp|O73672|PSA2_CARAU	psma2	Proteasome subunit alpha type-2 OS=Carassius auratus GN=psma2 PE=2 SV=3	80.2	3e-104
TRINITY_DN12859_c0_g1	sp|Q8TE49|OTU7A_HUMAN	OTUD7A	OTU domain-containing protein 7A OS=Homo sapiens GN=OTUD7A PE=1 SV=1	39.6	2.1e-45
TRINITY_DN12862_c0_g1	sp|Q2NL27|RT23_BOVIN	MRPS23	28S ribosomal protein S23, mitochondrial OS=Bos taurus GN=MRPS23 PE=1 SV=1	29.9	9.4e-08
TRINITY_DN12863_c0_g1	sp|Q5ZLM8|F133_CHICK	FAM133	Protein FAM133 OS=Gallus gallus GN=FAM133 PE=2 SV=1	61.2	1.1e-14
TRINITY_DN12864_c1_g1	sp|Q568W0|SELW_DANRE	sepw1	Selenoprotein W OS=Danio rerio GN=sepw1 PE=3 SV=3	58.3	2.5e-22
TRINITY_DN12866_c0_g1	sp|Q61035|SYHC_MOUSE	Hars	Histidine--tRNA ligase, cytoplasmic OS=Mus musculus GN=Hars PE=1 SV=2	64.2	3.8e-173
TRINITY_DN12866_c0_g2	sp|Q9NPJ8|NXT2_HUMAN	NXT2	NTF2-related export protein 2 OS=Homo sapiens GN=NXT2 PE=1 SV=1	38.6	1.7e-24
TRINITY_DN12867_c0_g1	sp|Q5ZLR1|WLS_CHICK	WLS	Protein wntless homolog OS=Gallus gallus GN=WLS PE=2 SV=1	35	6.3e-22
TRINITY_DN12869_c0_g1	sp|P67827|KC1A_BOVIN	CSNK1A1	Casein kinase I isoform alpha OS=Bos taurus GN=CSNK1A1 PE=1 SV=1	90.1	1.3e-76
TRINITY_DN12871_c0_g2	sp|Q7L2J0|MEPCE_HUMAN	MEPCE	7SK snRNA methylphosphate capping enzyme OS=Homo sapiens GN=MEPCE PE=1 SV=1	43.2	2.1e-42
TRINITY_DN12874_c0_g1	sp|P78540|ARGI2_HUMAN	ARG2	Arginase-2, mitochondrial OS=Homo sapiens GN=ARG2 PE=1 SV=1	34.8	1.2e-38
TRINITY_DN12882_c0_g1	sp|Q5VT06|CE350_HUMAN	CEP350	Centrosome-associated protein 350 OS=Homo sapiens GN=CEP350 PE=1 SV=1	27.8	5.7e-08
TRINITY_DN12886_c0_g1	sp|Q98A07|DCHS_RHILO	hdc	Histidine decarboxylase OS=Rhizobium loti (strain MAFF303099) GN=hdc PE=3 SV=1	28.7	3.2e-15
TRINITY_DN12886_c0_g2	sp|Q98A07|DCHS_RHILO	hdc	Histidine decarboxylase OS=Rhizobium loti (strain MAFF303099) GN=hdc PE=3 SV=1	26	2.6e-08
TRINITY_DN12889_c0_g1	sp|Q4KLN6|RIR2_RAT	Rrm2	Ribonucleoside-diphosphate reductase subunit M2 OS=Rattus norvegicus GN=Rrm2 PE=2 SV=1	47.1	1.2e-98
TRINITY_DN12890_c0_g2	sp|F4IYM4|DEX1_ARATH	DEX1	Protein DEFECTIVE IN EXINE FORMATION 1 OS=Arabidopsis thaliana GN=DEX1 PE=2 SV=1	26.1	5.7e-37
TRINITY_DN12891_c0_g2	sp|Q9UJ70|NAGK_HUMAN	NAGK	N-acetyl-D-glucosamine kinase OS=Homo sapiens GN=NAGK PE=1 SV=4	48	7.5e-80
TRINITY_DN12892_c0_g1	sp|P25708|NDUV1_BOVIN	NDUFV1	NADH dehydrogenase [ubiquinone] flavoprotein 1, mitochondrial OS=Bos taurus GN=NDUFV1 PE=1 SV=2	83.4	4.8e-224
TRINITY_DN12907_c0_g1	sp|Q5U3Y5|SFT2A_RAT	Sft2d1	Vesicle transport protein SFT2A OS=Rattus norvegicus GN=Sft2d1 PE=2 SV=1	30	1.5e-13
TRINITY_DN12908_c0_g1	sp|Q5U3S1|KATL1_DANRE	katnal1	Katanin p60 ATPase-containing subunit A-like 1 OS=Danio rerio GN=katnal1 PE=2 SV=1	55.8	5.9e-148
TRINITY_DN12912_c0_g1	sp|P04394|NDUV2_BOVIN	NDUFV2	NADH dehydrogenase [ubiquinone] flavoprotein 2, mitochondrial OS=Bos taurus GN=NDUFV2 PE=1 SV=3	71.6	9.1e-97
TRINITY_DN12912_c1_g1	sp|C3XR70|ENOPH_BRAFL	BRAFLDRAFT_73099	Enolase-phosphatase E1 OS=Branchiostoma floridae GN=BRAFLDRAFT_73099 PE=3 SV=1	52.4	4.5e-29
TRINITY_DN12915_c0_g3	sp|P61007|RAB8A_CANLF	RAB8A	Ras-related protein Rab-8A OS=Canis lupus familiaris GN=RAB8A PE=2 SV=1	45.5	2.2e-41
TRINITY_DN12916_c0_g1	sp|Q9QYJ3|DNJB1_MOUSE	Dnajb1	DnaJ homolog subfamily B member 1 OS=Mus musculus GN=Dnajb1 PE=1 SV=3	46.8	2.1e-50
TRINITY_DN12920_c0_g1	sp|Q0VD48|VPS4B_BOVIN	VPS4B	Vacuolar protein sorting-associated protein 4B OS=Bos taurus GN=VPS4B PE=2 SV=1	84.5	1.2e-36
TRINITY_DN12924_c0_g1	sp|Q8R123|FAD1_MOUSE	Flad1	FAD synthase OS=Mus musculus GN=Flad1 PE=1 SV=1	39.3	9.6e-97
TRINITY_DN12925_c0_g1	sp|P46409|GSTMU_RABIT	-	Glutathione S-transferase Mu 1 OS=Oryctolagus cuniculus PE=1 SV=2	55.3	3.2e-46
TRINITY_DN12926_c0_g1	sp|Q568D2|CF161_DANRE	cfap161	Cilia- and flagella-associated protein 161 OS=Danio rerio GN=cfap161 PE=2 SV=1	39.1	2.3e-17
TRINITY_DN12928_c0_g1	sp|Q80YD6|SRGEF_MOUSE	Sergef	Secretion-regulating guanine nucleotide exchange factor OS=Mus musculus GN=Sergef PE=2 SV=2	32.1	9.3e-35
TRINITY_DN12932_c0_g1	sp|Q9Y6G5|COMDA_HUMAN	COMMD10	COMM domain-containing protein 10 OS=Homo sapiens GN=COMMD10 PE=1 SV=1	48.4	7.6e-46
TRINITY_DN12933_c0_g1	sp|Q2T9X7|UB2E3_BOVIN	UBE2E3	Ubiquitin-conjugating enzyme E2 E3 OS=Bos taurus GN=UBE2E3 PE=2 SV=1	63.6	8.6e-53
TRINITY_DN12934_c0_g1	sp|P20825|POL2_DROME	pol	Retrovirus-related Pol polyprotein from transposon 297 OS=Drosophila melanogaster GN=pol PE=3 SV=1	50.6	6.3e-19
TRINITY_DN12938_c0_g1	sp|Q17QC5|AP2S1_BOVIN	AP2S1	AP-2 complex subunit sigma OS=Bos taurus GN=AP2S1 PE=2 SV=1	84.4	2e-64
TRINITY_DN12939_c0_g1	sp|P53619|COPD_BOVIN	ARCN1	Coatomer subunit delta OS=Bos taurus GN=ARCN1 PE=1 SV=1	51.6	2.3e-92
TRINITY_DN12939_c0_g2	sp|Q810B3|BSH_MOUSE	Bsx	Brain-specific homeobox protein homolog OS=Mus musculus GN=Bsx PE=1 SV=1	60.3	2.1e-15
TRINITY_DN12939_c0_g3	sp|P53619|COPD_BOVIN	ARCN1	Coatomer subunit delta OS=Bos taurus GN=ARCN1 PE=1 SV=1	76.7	5.1e-68
TRINITY_DN12940_c0_g1	sp|F1MBP6|KLHL3_BOVIN	KLHL3	Kelch-like protein 3 OS=Bos taurus GN=KLHL3 PE=3 SV=3	38.1	1.7e-66
TRINITY_DN12958_c0_g1	sp|F1LMN3|E2F8_RAT	E2f8	Transcription factor E2F8 OS=Rattus norvegicus GN=E2f8 PE=1 SV=2	35.4	1.7e-33
TRINITY_DN12963_c0_g2	sp|Q7XJJ7|FAAH_ARATH	FAAH	Fatty acid amide hydrolase OS=Arabidopsis thaliana GN=FAAH PE=1 SV=1	33.9	8.4e-74
TRINITY_DN12971_c0_g1	sp|P30617|LEC_GALNI	-	Mannose-specific lectin OS=Galanthus nivalis PE=1 SV=1	61	4.2e-23
TRINITY_DN12972_c0_g2	sp|Q5U4U4|DONS_XENLA	donson	Protein downstream neighbor of son homolog OS=Xenopus laevis GN=donson PE=2 SV=1	36.8	1.1e-58
TRINITY_DN12972_c0_g4	sp|A5PK63|RS17_BOVIN	RPS17	40S ribosomal protein S17 OS=Bos taurus GN=RPS17 PE=2 SV=1	80.8	1.1e-51
TRINITY_DN12973_c0_g1	sp|Q9GR88|ERF1_POLMI	ERF1	Eukaryotic peptide chain release factor subunit 1 OS=Polyandrocarpa misakiensis GN=ERF1 PE=2 SV=1	82.4	1.1e-208
TRINITY_DN12990_c0_g1	sp|Q8TAC1|RFESD_HUMAN	RFESD	Rieske domain-containing protein OS=Homo sapiens GN=RFESD PE=1 SV=1	45.7	4.3e-31
TRINITY_DN13003_c0_g2	sp|Q8K3E5|AHI1_MOUSE	Ahi1	Jouberin OS=Mus musculus GN=Ahi1 PE=1 SV=2	30.9	8.1e-08
TRINITY_DN13003_c0_g3	sp|Q1JQB2|BUB3_BOVIN	BUB3	Mitotic checkpoint protein BUB3 OS=Bos taurus GN=BUB3 PE=2 SV=1	63.6	3.6e-121
TRINITY_DN13005_c0_g1	sp|Q0IHQ9|PXYP1_XENTR	pxylp1	2-phosphoxylose phosphatase 1 OS=Xenopus tropicalis GN=pxylp1 PE=2 SV=1	23	6.8e-19
TRINITY_DN13009_c1_g1	sp|Q12933|TRAF2_HUMAN	TRAF2	TNF receptor-associated factor 2 OS=Homo sapiens GN=TRAF2 PE=1 SV=2	33.1	2.3e-64
TRINITY_DN1300_c0_g1	sp|Q3E902|RS212_ARATH	RPS21C	40S ribosomal protein S21-2 OS=Arabidopsis thaliana GN=RPS21C PE=1 SV=2	84.2	2e-33
TRINITY_DN13016_c0_g1	sp|Q0P4Y8|LMF2_XENTR	lmf2	Lipase maturation factor 2 OS=Xenopus tropicalis GN=lmf2 PE=2 SV=1	49.7	2.7e-140
TRINITY_DN13019_c0_g1	sp|B6J2S1|TDH_COXB2	tdh	L-threonine 3-dehydrogenase OS=Coxiella burnetii (strain CbuG_Q212) GN=tdh PE=3 SV=1	38.1	1e-54
TRINITY_DN13020_c0_g1	sp|Q5ZJK8|TCPH_CHICK	CCT7	T-complex protein 1 subunit eta OS=Gallus gallus GN=CCT7 PE=1 SV=1	77.4	4.1e-240
TRINITY_DN13023_c0_g1	sp|Q8WY54|PPM1E_HUMAN	PPM1E	Protein phosphatase 1E OS=Homo sapiens GN=PPM1E PE=1 SV=2	52.4	7.5e-45
TRINITY_DN13024_c0_g1	sp|Q9HDC9|APMAP_HUMAN	APMAP	Adipocyte plasma membrane-associated protein OS=Homo sapiens GN=APMAP PE=1 SV=2	38	2.2e-47
TRINITY_DN13026_c0_g1	sp|Q13829|BACD2_HUMAN	TNFAIP1	BTB/POZ domain-containing adapter for CUL3-mediated RhoA degradation protein 2 OS=Homo sapiens GN=TNFAIP1 PE=1 SV=1	59.1	1.2e-54
TRINITY_DN13026_c0_g3	sp|Q58CS6|IFT20_BOVIN	IFT20	Intraflagellar transport protein 20 homolog OS=Bos taurus GN=IFT20 PE=2 SV=1	63.9	4.9e-36
TRINITY_DN13027_c1_g1	sp|Q4FZQ0|YF1BB_XENLA	yif1b-b	Protein YIF1B-B OS=Xenopus laevis GN=yif1b-b PE=2 SV=1	53.4	2.5e-62
TRINITY_DN13032_c0_g1	sp|Q9VHI4|SF3B5_DROME	CG11985	Probable splicing factor 3B subunit 5 OS=Drosophila melanogaster GN=CG11985 PE=1 SV=1	72.3	4.1e-33
TRINITY_DN13033_c0_g1	sp|Q4R3I0|MTX1_MACFA	MTX1	Metaxin-1 OS=Macaca fascicularis GN=MTX1 PE=2 SV=1	35.6	5.6e-33
TRINITY_DN13034_c0_g1	sp|Q9JMG1|EDF1_MOUSE	Edf1	Endothelial differentiation-related factor 1 OS=Mus musculus GN=Edf1 PE=1 SV=1	32.3	7.2e-20
TRINITY_DN13035_c0_g1	sp|Q91754|GCKR_XENLA	gckr	Glucokinase regulatory protein OS=Xenopus laevis GN=gckr PE=1 SV=1	33.3	2.1e-66
TRINITY_DN13037_c0_g1	sp|O60469|DSCAM_HUMAN	DSCAM	Down syndrome cell adhesion molecule OS=Homo sapiens GN=DSCAM PE=1 SV=2	26.4	6.5e-10
TRINITY_DN13038_c0_g1	sp|P98198|AT8B2_HUMAN	ATP8B2	Phospholipid-transporting ATPase ID OS=Homo sapiens GN=ATP8B2 PE=1 SV=2	54.4	5.7e-29
TRINITY_DN13040_c0_g1	sp|Q68FT1|COQ9_RAT	Coq9	Ubiquinone biosynthesis protein COQ9, mitochondrial OS=Rattus norvegicus GN=Coq9 PE=1 SV=2	40.3	3.6e-40
TRINITY_DN13042_c1_g3	sp|P24861|CCNA_PATVU	-	G2/mitotic-specific cyclin-A OS=Patella vulgata PE=2 SV=1	45.9	2.1e-71
TRINITY_DN13043_c0_g3	sp|Q9Y3B4|SF3B6_HUMAN	SF3B6	Splicing factor 3B subunit 6 OS=Homo sapiens GN=SF3B6 PE=1 SV=1	70	6e-47
TRINITY_DN13045_c0_g1	sp|Q5ZLL1|KC1E_CHICK	CSNK1E	Casein kinase I isoform epsilon OS=Gallus gallus GN=CSNK1E PE=2 SV=2	85.7	4.5e-160
TRINITY_DN13045_c0_g2	sp|Q17QI2|SSU72_BOVIN	SSU72	RNA polymerase II subunit A C-terminal domain phosphatase SSU72 OS=Bos taurus GN=SSU72 PE=2 SV=1	67.7	2.2e-71
TRINITY_DN13048_c0_g1	sp|P56931|E2F2_MOUSE	E2f2	Transcription factor E2F2 OS=Mus musculus GN=E2f2 PE=1 SV=2	33.9	5.6e-38
TRINITY_DN13049_c0_g1	sp|B0S5N4|PLXA3_DANRE	plxna3	Plexin A3 OS=Danio rerio GN=plxna3 PE=2 SV=2	37.4	1.1e-27
TRINITY_DN13054_c0_g1	sp|Q32LG3|MDHM_BOVIN	MDH2	Malate dehydrogenase, mitochondrial OS=Bos taurus GN=MDH2 PE=1 SV=1	71.2	2e-27
TRINITY_DN13055_c0_g1	sp|Q5ZMT7|ADCK1_CHICK	ADCK1	Uncharacterized aarF domain-containing protein kinase 1 OS=Gallus gallus GN=ADCK1 PE=2 SV=1	52.4	1.3e-128
TRINITY_DN13056_c0_g1	sp|Q8TAT6|NPL4_HUMAN	NPLOC4	Nuclear protein localization protein 4 homolog OS=Homo sapiens GN=NPLOC4 PE=1 SV=3	50.8	1.8e-50
TRINITY_DN13056_c0_g2	sp|P60670|NPL4_MOUSE	Nploc4	Nuclear protein localization protein 4 homolog OS=Mus musculus GN=Nploc4 PE=1 SV=3	48.7	1.2e-72
TRINITY_DN13061_c0_g1	sp|Q9VQH2|DUOX_DROME	Duox	Dual oxidase OS=Drosophila melanogaster GN=Duox PE=1 SV=2	40.2	4.6e-52
TRINITY_DN13065_c0_g1	sp|Q6AY61|PRS23_RAT	Prss23	Serine protease 23 OS=Rattus norvegicus GN=Prss23 PE=2 SV=1	31.8	1.3e-29
TRINITY_DN13066_c0_g1	sp|Q8R431|MGLL_RAT	Mgll	Monoglyceride lipase OS=Rattus norvegicus GN=Mgll PE=1 SV=1	35.1	8.8e-43
TRINITY_DN13076_c0_g1	sp|Q7TN33|CELF6_MOUSE	Celf6	CUGBP Elav-like family member 6 OS=Mus musculus GN=Celf6 PE=2 SV=1	45.7	8.6e-96
TRINITY_DN13080_c0_g1	sp|A7RIT9|3HAO_NEMVE	v1g178517	3-hydroxyanthranilate 3,4-dioxygenase OS=Nematostella vectensis GN=v1g178517 PE=3 SV=1	48.6	9e-72
TRINITY_DN13084_c0_g1	sp|Q3T0W9|RL19_BOVIN	RPL19	60S ribosomal protein L19 OS=Bos taurus GN=RPL19 PE=2 SV=1	78	6e-65
TRINITY_DN13095_c0_g1	sp|Q9H920|RN121_HUMAN	RNF121	RING finger protein 121 OS=Homo sapiens GN=RNF121 PE=1 SV=1	52.8	3.7e-92
TRINITY_DN13096_c0_g15	sp|P29388|NU5M_ARATH	ND5	NADH-ubiquinone oxidoreductase chain 5 OS=Arabidopsis thaliana GN=ND5 PE=2 SV=3	100	1.2e-38
TRINITY_DN13096_c0_g7	sp|P10330|NU5M_OENBE	ND5	NADH-ubiquinone oxidoreductase chain 5 OS=Oenothera berteroana GN=ND5 PE=2 SV=2	98.9	3.4e-48
TRINITY_DN13096_c0_g9	sp|P93318|M660_ARATH	AtMg00660	Uncharacterized mitochondrial protein AtMg00660 OS=Arabidopsis thaliana GN=AtMg00660 PE=4 SV=1	87.7	2e-21
TRINITY_DN13097_c0_g1	sp|P48160|RL27A_DICDI	rpl27a	60S ribosomal protein L27a OS=Dictyostelium discoideum GN=rpl27a PE=3 SV=1	59.6	3e-45
TRINITY_DN13099_c0_g1	sp|Q08BI9|MCU_DANRE	mcu	Calcium uniporter protein, mitochondrial OS=Danio rerio GN=mcu PE=2 SV=1	35.6	4.5e-62
TRINITY_DN1309_c0_g1	sp|Q9VXX8|RL371_DROME	RpL37a	Probable 60S ribosomal protein L37-A OS=Drosophila melanogaster GN=RpL37a PE=1 SV=1	78.6	2.7e-27
TRINITY_DN13103_c0_g2	sp|Q39524|HUP2_PARKE	HUP2	H(+)/hexose cotransporter 2 OS=Parachlorella kessleri GN=HUP2 PE=2 SV=1	59.2	1.4e-65
TRINITY_DN13103_c0_g3	sp|Q39524|HUP2_PARKE	HUP2	H(+)/hexose cotransporter 2 OS=Parachlorella kessleri GN=HUP2 PE=2 SV=1	61.9	3.6e-51
TRINITY_DN13104_c0_g1	sp|Q05117|PPA5_MOUSE	Acp5	Tartrate-resistant acid phosphatase type 5 OS=Mus musculus GN=Acp5 PE=1 SV=2	44.3	1.8e-75
TRINITY_DN13105_c0_g1	sp|Q8VE65|TAF12_MOUSE	Taf12	Transcription initiation factor TFIID subunit 12 OS=Mus musculus GN=Taf12 PE=1 SV=1	58.5	1.2e-32
TRINITY_DN13105_c0_g2	sp|P10881|LA_BOVIN	SSB	Lupus La protein homolog OS=Bos taurus GN=SSB PE=2 SV=2	35.3	3.7e-44
TRINITY_DN13111_c0_g2	sp|Q54GU0|ARSB_DICDI	arsB	Putative transporter arsB OS=Dictyostelium discoideum GN=arsB PE=2 SV=1	23.5	4.7e-28
TRINITY_DN13116_c0_g1	sp|Q9Z248|AEBP2_MOUSE	Aebp2	Zinc finger protein AEBP2 OS=Mus musculus GN=Aebp2 PE=1 SV=2	39.6	1.2e-16
TRINITY_DN13122_c0_g2	sp|Q6DRJ7|NDC80_DANRE	ndc80	Kinetochore protein NDC80 homolog OS=Danio rerio GN=ndc80 PE=2 SV=1	35.1	6.6e-28
TRINITY_DN13127_c0_g1	sp|Q5ZK36|ING3_CHICK	ING3	Inhibitor of growth protein 3 OS=Gallus gallus GN=ING3 PE=2 SV=1	70.9	6.6e-30
TRINITY_DN13129_c0_g1	sp|Q8VIK2|M17L2_MOUSE	Mpv17l2	Mpv17-like protein 2 OS=Mus musculus GN=Mpv17l2 PE=1 SV=1	36.2	9.6e-21
TRINITY_DN13130_c0_g1	sp|Q92752|TENR_HUMAN	TNR	Tenascin-R OS=Homo sapiens GN=TNR PE=1 SV=3	43.1	2e-32
TRINITY_DN13132_c0_g2	sp|Q8K363|DDX18_MOUSE	Ddx18	ATP-dependent RNA helicase DDX18 OS=Mus musculus GN=Ddx18 PE=1 SV=1	65	3e-195
TRINITY_DN13134_c0_g1	sp|Q4R4T8|LGMN_MACFA	LGMN	Legumain OS=Macaca fascicularis GN=LGMN PE=2 SV=1	51.2	2e-88
TRINITY_DN13135_c0_g1	sp|F1QPC3|SARAF_DANRE	saraf	Store-operated calcium entry-associated regulatory factor OS=Danio rerio GN=saraf PE=2 SV=1	54.9	6e-34
TRINITY_DN13144_c0_g2	sp|Q9UIJ5|ZDHC2_HUMAN	ZDHHC2	Palmitoyltransferase ZDHHC2 OS=Homo sapiens GN=ZDHHC2 PE=1 SV=1	40.5	1.3e-29
TRINITY_DN13145_c0_g1	sp|Q61458|CCNH_MOUSE	Ccnh	Cyclin-H OS=Mus musculus GN=Ccnh PE=1 SV=2	43.1	7.5e-60
TRINITY_DN13145_c0_g2	sp|O28987|Y1281_ARCFU	AF_1281	Uncharacterized protein AF_1281 OS=Archaeoglobus fulgidus (strain ATCC 49558 / VC-16 / DSM 4304 / JCM 9628 / NBRC 100126) GN=AF_1281 PE=3 SV=1	53.3	2.8e-27
TRINITY_DN13147_c0_g1	sp|A1A4M6|STAR5_BOVIN	STARD5	StAR-related lipid transfer protein 5 OS=Bos taurus GN=STARD5 PE=2 SV=1	35.4	1.9e-24
TRINITY_DN13150_c0_g1	sp|Q6GQ52|TI10B_XENLA	timm10-b	Mitochondrial import inner membrane translocase subunit Tim10-B OS=Xenopus laevis GN=timm10-b PE=3 SV=1	57.5	4.6e-22
TRINITY_DN13150_c1_g1	sp|Q9VCY8|ADRL_DROME	AdipoR	Adiponectin receptor protein OS=Drosophila melanogaster GN=AdipoR PE=1 SV=2	44.2	5.3e-69
TRINITY_DN13152_c0_g1	sp|P54644|KRAC_DICDI	pkbA	RAC family serine/threonine-protein kinase homolog OS=Dictyostelium discoideum GN=pkbA PE=1 SV=1	33.7	6.3e-09
TRINITY_DN13157_c1_g1	sp|A2CES0|NEUFC_DANRE	cyb5d2	Neuferricin OS=Danio rerio GN=cyb5d2 PE=3 SV=1	44.7	1.4e-49
TRINITY_DN13159_c0_g2	sp|Q9Y385|UB2J1_HUMAN	UBE2J1	Ubiquitin-conjugating enzyme E2 J1 OS=Homo sapiens GN=UBE2J1 PE=1 SV=2	44.8	4.7e-60
TRINITY_DN13161_c0_g1	sp|Q9LZU5|KN5D_ARATH	KIN5D	Kinesin-like protein KIN-5D OS=Arabidopsis thaliana GN=KIN5D PE=2 SV=1	26.2	5.6e-19
TRINITY_DN13166_c0_g1	sp|Q64471|GSTT1_MOUSE	Gstt1	Glutathione S-transferase theta-1 OS=Mus musculus GN=Gstt1 PE=1 SV=4	34.4	3.6e-32
TRINITY_DN13166_c0_g2	sp|Q2KHT7|RS27_BOVIN	RPS27	40S ribosomal protein S27 OS=Bos taurus GN=RPS27 PE=3 SV=3	91.5	8.4e-39
TRINITY_DN13167_c0_g1	sp|Q6PGZ3|MIPT3_DANRE	traf3ip1	TRAF3-interacting protein 1 OS=Danio rerio GN=traf3ip1 PE=2 SV=1	52.3	1.7e-38
TRINITY_DN13169_c0_g1	sp|Q6P011|EMC4_DANRE	emc4	ER membrane protein complex subunit 4 OS=Danio rerio GN=emc4 PE=2 SV=1	47.9	8.4e-32
TRINITY_DN13169_c0_g2	sp|A4D1U4|LCHN_HUMAN	LCHN	Protein LCHN OS=Homo sapiens GN=LCHN PE=1 SV=1	45.1	1.8e-88
TRINITY_DN13171_c1_g1	sp|Q9USM7|TIM23_SCHPO	tim23	Mitochondrial import inner membrane translocase subunit tim23 OS=Schizosaccharomyces pombe (strain 972 / ATCC 24843) GN=tim23 PE=3 SV=1	53.9	3.7e-24
TRINITY_DN13173_c0_g1	sp|Q2TA11|CA158_BOVIN	-	Uncharacterized protein C1orf158 homolog OS=Bos taurus PE=2 SV=1	38.7	5.3e-18
TRINITY_DN13175_c0_g1	sp|Q5I0J5|MITD1_RAT	Mitd1	MIT domain-containing protein 1 OS=Rattus norvegicus GN=Mitd1 PE=2 SV=1	47.4	3e-57
TRINITY_DN13176_c0_g1	sp|Q6PBN2|AIDA_DANRE	aida	Axin interactor, dorsalization-associated protein OS=Danio rerio GN=aida PE=1 SV=1	40.6	1.6e-47
TRINITY_DN13177_c0_g1	sp|Q32LE3|CETN1_BOVIN	CETN1	Centrin-1 OS=Bos taurus GN=CETN1 PE=2 SV=1	69.2	2e-37
TRINITY_DN13179_c0_g1	sp|P62247|RS8_DANRE	rps8	40S ribosomal protein S8 OS=Danio rerio GN=rps8 PE=2 SV=2	70.3	1.6e-82
TRINITY_DN1317_c0_g1	sp|Q5L8C7|RL30_BACFN	rpmD	50S ribosomal protein L30 OS=Bacteroides fragilis (strain ATCC 25285 / DSM 2151 / JCM 11019 / NCTC 9343) GN=rpmD PE=3 SV=1	54.2	4.2e-07
TRINITY_DN13180_c0_g1	sp|Q5E954|DNJA1_BOVIN	DNAJA1	DnaJ homolog subfamily A member 1 OS=Bos taurus GN=DNAJA1 PE=2 SV=2	56.6	3.1e-121
TRINITY_DN13185_c0_g3	sp|Q9JM76|ARPC3_MOUSE	Arpc3	Actin-related protein 2/3 complex subunit 3 OS=Mus musculus GN=Arpc3 PE=1 SV=3	62.1	3.8e-63
TRINITY_DN13187_c0_g1	sp|Q17770|PDI2_CAEEL	pdi-2	Protein disulfide-isomerase 2 OS=Caenorhabditis elegans GN=pdi-2 PE=1 SV=1	44.3	1.3e-103
TRINITY_DN13192_c0_g1	sp|Q9TVU5|RAB1_THEPA	rab1	Ras-related protein Rab-1 OS=Theileria parva GN=rab1 PE=1 SV=1	36.2	2.2e-19
TRINITY_DN13194_c0_g2	sp|Q06889|EGR3_HUMAN	EGR3	Early growth response protein 3 OS=Homo sapiens GN=EGR3 PE=2 SV=1	52.1	1.2e-10
TRINITY_DN13197_c0_g1	sp|E7FAW3|NBEL2_DANRE	nbeal2	Neurobeachin-like protein 2 OS=Danio rerio GN=nbeal2 PE=1 SV=1	30.4	7e-29
TRINITY_DN13198_c0_g1	sp|Q9ESW8|PGPI_MOUSE	Pgpep1	Pyroglutamyl-peptidase 1 OS=Mus musculus GN=Pgpep1 PE=1 SV=1	45	2.2e-43
TRINITY_DN13199_c0_g1	sp|Q9JL56|GDE1_MOUSE	Gde1	Glycerophosphodiester phosphodiesterase 1 OS=Mus musculus GN=Gde1 PE=1 SV=1	35.2	1.2e-38
TRINITY_DN13204_c0_g3	sp|Q6DFC2|CCD77_XENLA	ccdc77	Coiled-coil domain-containing protein 77 OS=Xenopus laevis GN=ccdc77 PE=2 SV=1	60	1.6e-11
TRINITY_DN13205_c0_g1	sp|Q9NQG5|RPR1B_HUMAN	RPRD1B	Regulation of nuclear pre-mRNA domain-containing protein 1B OS=Homo sapiens GN=RPRD1B PE=1 SV=1	44.5	3.9e-55
TRINITY_DN13207_c0_g1	sp|P43390|MT2_ACTDE	pKIWI504	Metallothionein-like protein type 2 OS=Actinidia deliciosa GN=pKIWI504 PE=2 SV=1	75.4	2e-09
TRINITY_DN13209_c0_g1	sp|O65396|GCST_ARATH	GDCST	Aminomethyltransferase, mitochondrial OS=Arabidopsis thaliana GN=GDCST PE=2 SV=1	51.7	4.6e-100
TRINITY_DN1320_c0_g1	sp|Q39459|MT2_CICAR	-	Metallothionein-like protein 2 OS=Cicer arietinum PE=3 SV=2	76.7	2.8e-21
TRINITY_DN13211_c0_g1	sp|Q6DCQ1|IRX2_XENLA	irx2	Iroquois-class homeodomain protein irx-2 OS=Xenopus laevis GN=irx2 PE=2 SV=1	61.8	4.2e-13
TRINITY_DN13215_c0_g1	sp|Q5BLF0|NMD3_DANRE	nmd3	60S ribosomal export protein NMD3 OS=Danio rerio GN=nmd3 PE=2 SV=1	67	2e-82
TRINITY_DN13216_c0_g1	sp|P27925|CREB1_BOVIN	CREB1	Cyclic AMP-responsive element-binding protein 1 OS=Bos taurus GN=CREB1 PE=1 SV=2	73.2	1.9e-18
TRINITY_DN13217_c0_g2	sp|Q3MII6|TBC25_HUMAN	TBC1D25	TBC1 domain family member 25 OS=Homo sapiens GN=TBC1D25 PE=1 SV=2	30	2.1e-24
TRINITY_DN13217_c0_g3	sp|P23193|TCEA1_HUMAN	TCEA1	Transcription elongation factor A protein 1 OS=Homo sapiens GN=TCEA1 PE=1 SV=2	41.9	7.5e-59
TRINITY_DN13219_c0_g2	sp|O75340|PDCD6_HUMAN	PDCD6	Programmed cell death protein 6 OS=Homo sapiens GN=PDCD6 PE=1 SV=1	64.6	4.9e-65
TRINITY_DN13225_c0_g1	sp|P11428|SODC2_MAIZE	SODCC.1	Superoxide dismutase [Cu-Zn] 2 OS=Zea mays GN=SODCC.1 PE=2 SV=2	63.1	3.6e-25
TRINITY_DN13225_c0_g2	sp|Q4V7D3|MACOI_RAT	Tmem57	Macoilin OS=Rattus norvegicus GN=Tmem57 PE=1 SV=1	29.5	2.1e-55
TRINITY_DN13225_c0_g3	sp|Q8L5E0|SODC2_OLEEU	OLE5	Superoxide dismutase [Cu-Zn] 2 OS=Olea europaea GN=OLE5 PE=1 SV=2	65.7	2.8e-22
TRINITY_DN13225_c0_g4	sp|O65768|SODC_CARPA	SODCC	Superoxide dismutase [Cu-Zn] OS=Carica papaya GN=SODCC PE=2 SV=1	73.6	1.2e-16
TRINITY_DN13228_c0_g1	sp|P27120|DCOR1_XENLA	odc1-a	Ornithine decarboxylase 1 OS=Xenopus laevis GN=odc1-a PE=2 SV=1	57.2	9.3e-48
TRINITY_DN13231_c0_g1	sp|Q566V0|ARCH_DANRE	zbtb8os	Protein archease OS=Danio rerio GN=zbtb8os PE=2 SV=2	60.7	1.9e-45
TRINITY_DN13233_c0_g2	sp|Q8VD72|TTC8_MOUSE	Ttc8	Tetratricopeptide repeat protein 8 OS=Mus musculus GN=Ttc8 PE=1 SV=1	62.8	3e-125
TRINITY_DN13236_c0_g1	sp|Q9NEW6|RSP3_CAEEL	rsp-3	Probable splicing factor, arginine/serine-rich 3 OS=Caenorhabditis elegans GN=rsp-3 PE=1 SV=2	47.3	1.9e-14
TRINITY_DN13236_c0_g6	sp|Q17LW0|MYO7A_AEDAE	ck	Myosin-VIIa OS=Aedes aegypti GN=ck PE=3 SV=1	68.2	1.6e-120
TRINITY_DN13239_c0_g2	sp|Q9P6J8|YHD2_SCHPO	SPBC1683.02	Uncharacterized deaminase C1683.02 OS=Schizosaccharomyces pombe (strain 972 / ATCC 24843) GN=SPBC1683.02 PE=3 SV=1	29.2	1e-29
TRINITY_DN13246_c0_g2	sp|Q6L3C9|YCF68_SACHY	ycf68-1	Uncharacterized protein ycf68 OS=Saccharum hybrid GN=ycf68-1 PE=3 SV=1	69	3.4e-34
TRINITY_DN13247_c0_g1	sp|P00125|CY1_BOVIN	CYC1	Cytochrome c1, heme protein, mitochondrial OS=Bos taurus GN=CYC1 PE=1 SV=2	61.5	1.3e-93
TRINITY_DN13248_c0_g2	sp|Q5XKL5|BTBD8_HUMAN	BTBD8	BTB/POZ domain-containing protein 8 OS=Homo sapiens GN=BTBD8 PE=2 SV=2	29.4	4.1e-13
TRINITY_DN13249_c2_g9	sp|O61462|RL37A_CRYST	RPL37A	60S ribosomal protein L37a OS=Cryptochiton stelleri GN=RPL37A PE=3 SV=3	80.4	3.4e-37
TRINITY_DN13251_c0_g1	sp|P21265|PUR8_CHICK	ADSL	Adenylosuccinate lyase OS=Gallus gallus GN=ADSL PE=2 SV=2	52.2	7e-126
TRINITY_DN13260_c0_g1	sp|Q6IP91|PP4C_XENLA	ppp4c	Serine/threonine-protein phosphatase 4 catalytic subunit OS=Xenopus laevis GN=ppp4c PE=2 SV=1	90.4	2.3e-92
TRINITY_DN13261_c0_g1	sp|J3SDX8|LICH_CROAD	-	Putative lysosomal acid lipase/cholesteryl ester hydrolase OS=Crotalus adamanteus PE=2 SV=1	48.3	1.4e-61
TRINITY_DN13263_c0_g1	sp|Q6CGG3|FKBP2_YARLI	FPR2	FK506-binding protein 2 OS=Yarrowia lipolytica (strain CLIB 122 / E 150) GN=FPR2 PE=3 SV=1	44	3.1e-24
TRINITY_DN13266_c0_g1	sp|P55010|IF5_HUMAN	EIF5	Eukaryotic translation initiation factor 5 OS=Homo sapiens GN=EIF5 PE=1 SV=2	76.6	2.3e-45
TRINITY_DN13271_c0_g1	sp|Q9R088|KITM_MOUSE	Tk2	Thymidine kinase 2, mitochondrial OS=Mus musculus GN=Tk2 PE=1 SV=2	42	7.3e-49
TRINITY_DN13273_c0_g1	sp|Q7Z2Z2|EFL1_HUMAN	EFL1	Elongation factor-like GTPase 1 OS=Homo sapiens GN=EFL1 PE=1 SV=2	45.5	4.1e-72
TRINITY_DN13278_c0_g1	sp|Q7T0T2|LTR3B_XENLA	lamtor3-b	Ragulator complex protein LAMTOR3-B OS=Xenopus laevis GN=lamtor3-b PE=2 SV=1	56.9	7.3e-33
TRINITY_DN13282_c0_g2	sp|Q6DBU5|GMPPB_DANRE	gmppb	Mannose-1-phosphate guanyltransferase beta OS=Danio rerio GN=gmppb PE=2 SV=1	69.7	3e-131
TRINITY_DN13287_c0_g1	sp|Q05975|RAB2_LYMST	RAB2	Ras-related protein Rab-2 OS=Lymnaea stagnalis GN=RAB2 PE=2 SV=1	91.3	2e-94
TRINITY_DN13290_c0_g1	sp|Q2M2H8|MGAL_HUMAN	MGAM2	Probable maltase-glucoamylase 2 OS=Homo sapiens GN=MGAM2 PE=2 SV=3	57.3	5.6e-22
TRINITY_DN13296_c0_g3	sp|Q9V9U4|DOHH_DROME	nero	Deoxyhypusine hydroxylase OS=Drosophila melanogaster GN=nero PE=2 SV=1	49.2	1.1e-75
TRINITY_DN13302_c0_g3	sp|Q5I047|F173B_XENLA	fam173b	Protein FAM173B OS=Xenopus laevis GN=fam173b PE=2 SV=1	53.9	1.9e-15
TRINITY_DN13303_c1_g1	sp|P36874|PP1GA_XENLA	ppp1cc-a	Serine/threonine-protein phosphatase PP1-gamma catalytic subunit A OS=Xenopus laevis GN=ppp1cc-a PE=1 SV=2	86	1.8e-132
TRINITY_DN13303_c1_g3	sp|Q9Y6N5|SQRD_HUMAN	SQRDL	Sulfide:quinone oxidoreductase, mitochondrial OS=Homo sapiens GN=SQRDL PE=1 SV=1	53.7	5.3e-134
TRINITY_DN13307_c0_g1	sp|O75312|ZPR1_HUMAN	ZPR1	Zinc finger protein ZPR1 OS=Homo sapiens GN=ZPR1 PE=1 SV=1	54.8	4.7e-130
TRINITY_DN13316_c0_g4	sp|Q8BUG5|CAYP2_MOUSE	Caps2	Calcyphosin-2 OS=Mus musculus GN=Caps2 PE=2 SV=2	33.4	9e-48
TRINITY_DN13316_c0_g6	sp|A4IFG2|BTBD9_BOVIN	BTBD9	BTB/POZ domain-containing protein 9 OS=Bos taurus GN=BTBD9 PE=2 SV=2	23.1	3e-16
TRINITY_DN13316_c0_g8	sp|A1L4W5|BPM6_ARATH	BPM6	BTB/POZ and MATH domain-containing protein 6 OS=Arabidopsis thaliana GN=BPM6 PE=1 SV=1	40	4.9e-06
TRINITY_DN13324_c0_g1	sp|A6NDG6|PGP_HUMAN	PGP	Glycerol-3-phosphate phosphatase OS=Homo sapiens GN=PGP PE=1 SV=1	43.1	1.3e-59
TRINITY_DN13325_c0_g1	sp|Q13686|ALKB1_HUMAN	ALKBH1	DNA demethylase ALKBH1 OS=Homo sapiens GN=ALKBH1 PE=1 SV=2	35.8	6.1e-62
TRINITY_DN13328_c0_g2	sp|Q6PC64|ELOV6_DANRE	elovl6	Elongation of very long chain fatty acids protein 6 OS=Danio rerio GN=elovl6 PE=2 SV=1	43.7	8.1e-51
TRINITY_DN13333_c1_g1	sp|Q8JZP3|KLHL2_MOUSE	Klhl2	Kelch-like protein 2 OS=Mus musculus GN=Klhl2 PE=1 SV=1	36.3	4.8e-43
TRINITY_DN13333_c2_g1	sp|P25490|TYY1_HUMAN	YY1	Transcriptional repressor protein YY1 OS=Homo sapiens GN=YY1 PE=1 SV=2	61.6	3.3e-53
TRINITY_DN13333_c2_g2	sp|Q6NWD4|TIM50_DANRE	timm50	Mitochondrial import inner membrane translocase subunit TIM50 OS=Danio rerio GN=timm50 PE=2 SV=2	41.3	6.5e-54
TRINITY_DN13333_c3_g2	sp|Q9W689|ATX3_CHICK	ATXN3	Ataxin-3 OS=Gallus gallus GN=ATXN3 PE=2 SV=1	62.2	1.5e-25
TRINITY_DN13336_c0_g1	sp|Q3ZCI8|REEP4_BOVIN	REEP4	Receptor expression-enhancing protein 4 OS=Bos taurus GN=REEP4 PE=2 SV=1	49.3	4.3e-36
TRINITY_DN13337_c0_g1	sp|Q2KIB9|RPP29_BOVIN	POP4	Ribonuclease P protein subunit p29 OS=Bos taurus GN=POP4 PE=2 SV=1	45	3.3e-40
TRINITY_DN13337_c0_g2	sp|Q3UFB7|NTRK1_MOUSE	Ntrk1	High affinity nerve growth factor receptor OS=Mus musculus GN=Ntrk1 PE=1 SV=2	35.8	8.2e-40
TRINITY_DN13338_c0_g1	sp|Q9LDU6|ST7R_ARATH	DWF5	7-dehydrocholesterol reductase OS=Arabidopsis thaliana GN=DWF5 PE=1 SV=1	43.6	1.6e-122
TRINITY_DN13347_c0_g1	sp|B4EY26|CAID_PROMH	caiD	Carnitinyl-CoA dehydratase OS=Proteus mirabilis (strain HI4320) GN=caiD PE=3 SV=1	37.3	8.4e-25
TRINITY_DN13350_c0_g1	sp|Q5G265|NETR_SAGLB	PRSS12	Neurotrypsin OS=Saguinus labiatus GN=PRSS12 PE=3 SV=1	40.8	2.1e-40
TRINITY_DN13354_c0_g1	sp|Q3ZBF3|RM38_BOVIN	MRPL38	39S ribosomal protein L38, mitochondrial OS=Bos taurus GN=MRPL38 PE=1 SV=2	34.8	2e-14
TRINITY_DN13354_c0_g2	sp|Q5RF21|GBRL1_PONAB	GABARAPL1	Gamma-aminobutyric acid receptor-associated protein-like 1 OS=Pongo abelii GN=GABARAPL1 PE=3 SV=1	35.7	3.4e-12
TRINITY_DN13354_c0_g6	sp|Q9P2T1|GMPR2_HUMAN	GMPR2	GMP reductase 2 OS=Homo sapiens GN=GMPR2 PE=1 SV=1	75.1	2.1e-152
TRINITY_DN13354_c0_g7	sp|Q96L58|B3GT6_HUMAN	B3GALT6	Beta-1,3-galactosyltransferase 6 OS=Homo sapiens GN=B3GALT6 PE=1 SV=2	48.5	1.2e-71
TRINITY_DN13358_c0_g1	sp|Q803I4|RING2_DANRE	rnf2	E3 ubiquitin-protein ligase RING2 OS=Danio rerio GN=rnf2 PE=2 SV=1	38.3	1.3e-48
TRINITY_DN13360_c0_g1	sp|Q24246|DYIN_DROME	sw	Cytoplasmic dynein 1 intermediate chain OS=Drosophila melanogaster GN=sw PE=1 SV=3	22.2	3.7e-16
TRINITY_DN13361_c0_g1	sp|P26518|G3PC_MAGLI	GAPC	Glyceraldehyde-3-phosphate dehydrogenase, cytosolic OS=Magnolia liliiflora GN=GAPC PE=2 SV=1	93.8	5.4e-66
TRINITY_DN13361_c0_g3	sp|P34921|G3PC_DIACA	GAPC	Glyceraldehyde-3-phosphate dehydrogenase, cytosolic OS=Dianthus caryophyllus GN=GAPC PE=3 SV=1	95.7	3.2e-32
TRINITY_DN13362_c0_g1	sp|Q9HAN9|NMNA1_HUMAN	NMNAT1	Nicotinamide/nicotinic acid mononucleotide adenylyltransferase 1 OS=Homo sapiens GN=NMNAT1 PE=1 SV=1	37.7	5.4e-12
TRINITY_DN13363_c0_g1	sp|Q9Y3A2|UTP11_HUMAN	UTP11	Probable U3 small nucleolar RNA-associated protein 11 OS=Homo sapiens GN=UTP11 PE=1 SV=2	44.8	2.7e-34
TRINITY_DN13365_c0_g2	sp|E7EY42|PTSS2_DANRE	ptdss2	Phosphatidylserine synthase 2 OS=Danio rerio GN=ptdss2 PE=3 SV=1	49	4.8e-119
TRINITY_DN13366_c0_g1	sp|P34147|RACA_DICDI	racA	Rho-related protein racA OS=Dictyostelium discoideum GN=racA PE=1 SV=2	48	1.6e-22
TRINITY_DN13369_c1_g1	sp|Q3SX23|LONP2_BOVIN	LONP2	Lon protease homolog 2, peroxisomal OS=Bos taurus GN=LONP2 PE=2 SV=1	46.6	4.6e-94
TRINITY_DN13369_c1_g5	sp|P08761|MSRA_DROME	Eip71CD	Peptide methionine sulfoxide reductase OS=Drosophila melanogaster GN=Eip71CD PE=2 SV=2	39.4	4.5e-37
TRINITY_DN13369_c1_g6	sp|Q6DRH5|NOP10_DANRE	nop10	H/ACA ribonucleoprotein complex subunit 3 OS=Danio rerio GN=nop10 PE=3 SV=1	71	4e-20
TRINITY_DN13371_c0_g1	sp|Q7Z7F0|K0907_HUMAN	KIAA0907	UPF0469 protein KIAA0907 OS=Homo sapiens GN=KIAA0907 PE=1 SV=1	57	8.2e-32
TRINITY_DN13375_c0_g1	sp|Q0V9R3|DI3L2_XENTR	dis3l2	DIS3-like exonuclease 2 OS=Xenopus tropicalis GN=dis3l2 PE=2 SV=2	45.9	6.1e-26
TRINITY_DN13375_c0_g4	sp|Q8CI75|DI3L2_MOUSE	Dis3l2	DIS3-like exonuclease 2 OS=Mus musculus GN=Dis3l2 PE=1 SV=1	46.1	4.7e-120
TRINITY_DN13376_c0_g2	sp|Q6P1N0|C2D1A_HUMAN	CC2D1A	Coiled-coil and C2 domain-containing protein 1A OS=Homo sapiens GN=CC2D1A PE=1 SV=1	29.8	1.7e-61
TRINITY_DN13377_c0_g3	sp|Q5R7P4|BGAL_PONAB	GLB1	Beta-galactosidase OS=Pongo abelii GN=GLB1 PE=2 SV=1	49.7	3e-175
TRINITY_DN13378_c0_g2	sp|Q1MTR5|YG66_SCHPO	SPBC15C4.06c	Uncharacterized RING finger membrane protein C15C4.06c OS=Schizosaccharomyces pombe (strain 972 / ATCC 24843) GN=SPBC15C4.06c PE=3 SV=1	42.1	6.5e-07
TRINITY_DN13379_c0_g2	sp|O82796|SERC_ARATH	PSP	Phosphoserine phosphatase, chloroplastic OS=Arabidopsis thaliana GN=PSP PE=1 SV=2	48.9	1.6e-32
TRINITY_DN13380_c0_g2	sp|O60140|YNS9_SCHPO	SPBC18H10.09	Uncharacterized protein C18H10.09 OS=Schizosaccharomyces pombe (strain 972 / ATCC 24843) GN=SPBC18H10.09 PE=3 SV=2	33.7	2.4e-39
TRINITY_DN13380_c0_g3	sp|P58050|C71BD_ARATH	CYP71B13	Cytochrome P450 71B13 OS=Arabidopsis thaliana GN=CYP71B13 PE=2 SV=1	36.8	1.9e-11
TRINITY_DN13381_c0_g1	sp|Q09575|YRD6_CAEEL	K02A2.6	Uncharacterized protein K02A2.6 OS=Caenorhabditis elegans GN=K02A2.6 PE=3 SV=1	31.9	8.9e-29
TRINITY_DN13382_c0_g1	sp|Q8MQW8|SPRI_DROME	spri	Protein sprint OS=Drosophila melanogaster GN=spri PE=2 SV=3	29.2	4.3e-35
TRINITY_DN13389_c0_g1	sp|Q9N2I1|CASP1_PIG	CASP1	Caspase-1 OS=Sus scrofa GN=CASP1 PE=2 SV=1	32.7	2.3e-08
TRINITY_DN13392_c0_g1	sp|Q9H6R0|DHX33_HUMAN	DHX33	Putative ATP-dependent RNA helicase DHX33 OS=Homo sapiens GN=DHX33 PE=1 SV=2	52.3	2.1e-192
TRINITY_DN13394_c0_g1	sp|Q6AZT4|BRM1L_XENLA	brms1l	Breast cancer metastasis-suppressor 1-like protein OS=Xenopus laevis GN=brms1l PE=2 SV=1	41	2e-29
TRINITY_DN13394_c0_g2	sp|Q66KV4|BAFB_XENLA	banf1-b	Barrier-to-autointegration factor B OS=Xenopus laevis GN=banf1-b PE=1 SV=1	80	6.1e-38
TRINITY_DN13395_c0_g1	sp|Q17330|SEM1A_CAEEL	smp-1	Semaphorin-1A OS=Caenorhabditis elegans GN=smp-1 PE=2 SV=2	38.5	3.1e-06
TRINITY_DN13397_c0_g1	sp|P83678|PHAP_DELAC	phaP	Phasin (Fragment) OS=Delftia acidovorans GN=phaP PE=1 SV=1	73.7	9e-07
TRINITY_DN13398_c0_g1	sp|Q8IYX7|SAXO1_HUMAN	SAXO1	Stabilizer of axonemal microtubules 1 OS=Homo sapiens GN=SAXO1 PE=1 SV=2	21.6	1.2e-15
TRINITY_DN13401_c0_g5	sp|Q9HCD5|NCOA5_HUMAN	NCOA5	Nuclear receptor coactivator 5 OS=Homo sapiens GN=NCOA5 PE=1 SV=2	29.7	1.3e-15
TRINITY_DN13405_c0_g1	sp|Q04336|YM54_YEAST	YMR196W	Uncharacterized protein YMR196W OS=Saccharomyces cerevisiae (strain ATCC 204508 / S288c) GN=YMR196W PE=1 SV=1	44.3	2.2e-87
TRINITY_DN13406_c0_g1	sp|P97554|DNJB9_RAT	Dnajb9	DnaJ homolog subfamily B member 9 OS=Rattus norvegicus GN=Dnajb9 PE=2 SV=2	32.9	2.7e-20
TRINITY_DN13413_c0_g1	sp|Q91XF4|RN167_MOUSE	Rnf167	E3 ubiquitin-protein ligase RNF167 OS=Mus musculus GN=Rnf167 PE=2 SV=1	38.5	7.9e-13
TRINITY_DN13415_c0_g1	sp|Q9DB20|ATPO_MOUSE	Atp5o	ATP synthase subunit O, mitochondrial OS=Mus musculus GN=Atp5o PE=1 SV=1	45.1	6.8e-30
TRINITY_DN13416_c0_g1	sp|E7EZF3|UHRF1_DANRE	uhrf1	E3 ubiquitin-protein ligase UHRF1 OS=Danio rerio GN=uhrf1 PE=1 SV=1	55.4	3.9e-246
TRINITY_DN13418_c0_g2	sp|A8E7G4|FA45A_DANRE	fam45a	Protein FAM45A OS=Danio rerio GN=fam45a PE=2 SV=1	42	6.1e-54
TRINITY_DN13425_c2_g3	sp|Q3V4Z7|RK14_ACOCL	rpl14	50S ribosomal protein L14, chloroplastic OS=Acorus calamus GN=rpl14 PE=3 SV=1	89.9	3e-34
TRINITY_DN13426_c1_g2	sp|Q6DRN3|NOC3L_DANRE	noc3l	Nucleolar complex protein 3 homolog OS=Danio rerio GN=noc3l PE=2 SV=1	55.4	1.7e-15
TRINITY_DN13427_c0_g1	sp|Q8AWF2|NACA_ORENI	naca	Nascent polypeptide-associated complex subunit alpha OS=Oreochromis niloticus GN=naca PE=2 SV=1	72.8	6.7e-35
TRINITY_DN13428_c0_g1	sp|Q9UQ90|SPG7_HUMAN	SPG7	Paraplegin OS=Homo sapiens GN=SPG7 PE=1 SV=2	55.1	7.7e-146
TRINITY_DN13429_c0_g2	sp|P43234|CATO_HUMAN	CTSO	Cathepsin O OS=Homo sapiens GN=CTSO PE=2 SV=1	47.3	2.2e-26
TRINITY_DN13432_c0_g5	sp|P18915|CAH6_BOVIN	CA6	Carbonic anhydrase 6 OS=Bos taurus GN=CA6 PE=1 SV=2	33.2	1.1e-27
TRINITY_DN13434_c0_g1	sp|Q8R550|SH3K1_MOUSE	Sh3kbp1	SH3 domain-containing kinase-binding protein 1 OS=Mus musculus GN=Sh3kbp1 PE=1 SV=1	49	1.8e-09
TRINITY_DN13436_c2_g1	sp|Q96PU9|ODF3A_HUMAN	ODF3	Outer dense fiber protein 3 OS=Homo sapiens GN=ODF3 PE=2 SV=1	40.7	1.3e-30
TRINITY_DN13438_c1_g7	sp|Q6C5P0|MED10_YARLI	NUT2	Mediator of RNA polymerase II transcription subunit 10 OS=Yarrowia lipolytica (strain CLIB 122 / E 150) GN=NUT2 PE=3 SV=1	37.5	3.8e-07
TRINITY_DN13439_c0_g3	sp|Q9Z2Q6|SEPT5_MOUSE	Sept5	Septin-5 OS=Mus musculus GN=Sept5 PE=1 SV=2	57.6	4.6e-110
TRINITY_DN13439_c0_g4	sp|Q8IYB5|SMAP1_HUMAN	SMAP1	Stromal membrane-associated protein 1 OS=Homo sapiens GN=SMAP1 PE=1 SV=2	77	1.9e-29
TRINITY_DN13443_c0_g1	sp|P11588|MUP1_MOUSE	Mup1	Major urinary protein 1 OS=Mus musculus GN=Mup1 PE=1 SV=1	100	2.3e-100
TRINITY_DN13444_c2_g1	sp|Q86UY8|NT5D3_HUMAN	NT5DC3	5'-nucleotidase domain-containing protein 3 OS=Homo sapiens GN=NT5DC3 PE=1 SV=1	42.1	1.7e-113
TRINITY_DN13449_c0_g3	sp|F7J220|SRCR1_PATPE	SRCR1	Scavenger receptor cysteine-rich domain superfamily protein OS=Patiria pectinifera GN=SRCR1 PE=1 SV=1	44.6	1.8e-12
TRINITY_DN13450_c0_g1	sp|Q6IND4|EEPD1_XENLA	eepd1	Endonuclease/exonuclease/phosphatase family domain-containing protein 1 OS=Xenopus laevis GN=eepd1 PE=2 SV=1	29.6	5.4e-46
TRINITY_DN13451_c3_g1	sp|Q3SWY6|STK25_BOVIN	STK25	Serine/threonine-protein kinase 25 OS=Bos taurus GN=STK25 PE=2 SV=1	87.1	1.8e-41
TRINITY_DN13451_c3_g5	sp|Q99KH8|STK24_MOUSE	Stk24	Serine/threonine-protein kinase 24 OS=Mus musculus GN=Stk24 PE=1 SV=1	61.1	6.9e-36
TRINITY_DN13452_c0_g4	sp|Q03161|YMY9_YEAST	YMR099C	Glucose-6-phosphate 1-epimerase OS=Saccharomyces cerevisiae (strain ATCC 204508 / S288c) GN=YMR099C PE=1 SV=1	33.1	3.1e-10
TRINITY_DN13452_c0_g5	sp|Q9W4S1|GRCR2_DROME	CG12206	Glutaredoxin domain-containing cysteine-rich protein CG12206 OS=Drosophila melanogaster GN=CG12206 PE=2 SV=2	42.3	3.5e-34
TRINITY_DN13452_c1_g1	sp|Q28811|PHR_POTTR	PHR	Deoxyribodipyrimidine photo-lyase OS=Potorous tridactylus GN=PHR PE=2 SV=1	60.4	1.9e-160
TRINITY_DN13452_c1_g3	sp|Q9Y4A5|TRRAP_HUMAN	TRRAP	Transformation/transcription domain-associated protein OS=Homo sapiens GN=TRRAP PE=1 SV=3	74.3	4.7e-109
TRINITY_DN13453_c0_g17	sp|Q7LHG5|YI31B_YEAST	TY3B-I	Transposon Ty3-I Gag-Pol polyprotein OS=Saccharomyces cerevisiae (strain ATCC 204508 / S288c) GN=TY3B-I PE=3 SV=2	39.7	2.8e-18
TRINITY_DN13453_c0_g6	sp|Q06136|KDSR_HUMAN	KDSR	3-ketodihydrosphingosine reductase OS=Homo sapiens GN=KDSR PE=1 SV=1	40.5	1.1e-46
TRINITY_DN13454_c0_g1	sp|Q06331|TBA_ENTDO	-	Tubulin alpha chain OS=Enteroctopus dofleini PE=2 SV=1	86.5	9.4e-52
TRINITY_DN13454_c2_g1	sp|P18288|TBAT_ONCMY	-	Tubulin alpha chain, testis-specific OS=Oncorhynchus mykiss PE=2 SV=1	98.6	1.5e-249
TRINITY_DN13454_c2_g2	sp|P68362|TBA1A_CRIGR	TUBA1A	Tubulin alpha-1A chain OS=Cricetulus griseus GN=TUBA1A PE=2 SV=1	100	1e-10
TRINITY_DN13455_c0_g1	sp|Q9BZE4|NOG1_HUMAN	GTPBP4	Nucleolar GTP-binding protein 1 OS=Homo sapiens GN=GTPBP4 PE=1 SV=3	64.8	7.9e-224
TRINITY_DN13463_c0_g2	sp|Q6NUT7|SORT1_DANRE	sort1	Sortilin OS=Danio rerio GN=sort1 PE=2 SV=1	28.9	8.9e-48
TRINITY_DN13467_c0_g1	sp|Q91XV4|DCXR_MESAU	DCXR	L-xylulose reductase OS=Mesocricetus auratus GN=DCXR PE=1 SV=1	55.6	2.4e-60
TRINITY_DN13471_c0_g5	sp|Q5R7B1|CLP1L_PONAB	CLPTM1L	Cleft lip and palate transmembrane protein 1-like protein OS=Pongo abelii GN=CLPTM1L PE=2 SV=1	66.6	3.7e-114
TRINITY_DN13471_c1_g1	sp|P27544|CERS1_HUMAN	CERS1	Ceramide synthase 1 OS=Homo sapiens GN=CERS1 PE=1 SV=1	39.8	3.2e-44
TRINITY_DN13472_c0_g1	sp|Q8K2L8|TPC12_MOUSE	Trappc12	Trafficking protein particle complex subunit 12 OS=Mus musculus GN=Trappc12 PE=1 SV=2	31.8	9.5e-60
TRINITY_DN13472_c1_g1	sp|Q96EK6|GNA1_HUMAN	GNPNAT1	Glucosamine 6-phosphate N-acetyltransferase OS=Homo sapiens GN=GNPNAT1 PE=1 SV=1	47.8	2.6e-40
TRINITY_DN13474_c0_g1	sp|Q9CQ46|EFCB2_MOUSE	Efcab2	EF-hand calcium-binding domain-containing protein 2 OS=Mus musculus GN=Efcab2 PE=1 SV=1	65.8	5.3e-54
TRINITY_DN13475_c0_g3	sp|Q3UJK4|GTPB2_MOUSE	Gtpbp2	GTP-binding protein 2 OS=Mus musculus GN=Gtpbp2 PE=1 SV=1	52.4	3.2e-134
TRINITY_DN13480_c3_g3	sp|Q99315|YG31B_YEAST	TY3B-G	Transposon Ty3-G Gag-Pol polyprotein OS=Saccharomyces cerevisiae (strain ATCC 204508 / S288c) GN=TY3B-G PE=1 SV=3	50.6	6.8e-19
TRINITY_DN13486_c0_g1	sp|O08730|GLYG_RAT	Gyg1	Glycogenin-1 OS=Rattus norvegicus GN=Gyg1 PE=2 SV=4	42.9	2.9e-73
TRINITY_DN13488_c0_g1	sp|P48452|PP2BA_BOVIN	PPP3CA	Serine/threonine-protein phosphatase 2B catalytic subunit alpha isoform OS=Bos taurus GN=PPP3CA PE=1 SV=1	41.9	1.8e-61
TRINITY_DN13489_c3_g1	sp|Q29RZ2|PPWD1_BOVIN	PPWD1	Peptidylprolyl isomerase domain and WD repeat-containing protein 1 OS=Bos taurus GN=PPWD1 PE=2 SV=1	61.1	2.8e-226
TRINITY_DN13489_c4_g3	sp|Q8IRG6|SPT16_DROME	dre4	FACT complex subunit spt16 OS=Drosophila melanogaster GN=dre4 PE=1 SV=2	68.7	5.5e-115
TRINITY_DN13489_c4_g4	sp|Q920B9|SP16H_MOUSE	Supt16h	FACT complex subunit SPT16 OS=Mus musculus GN=Supt16h PE=1 SV=2	47.3	3.4e-163
TRINITY_DN13492_c0_g1	sp|O97860|PPA5_RABIT	ACP5	Tartrate-resistant acid phosphatase type 5 OS=Oryctolagus cuniculus GN=ACP5 PE=2 SV=1	43.5	4.4e-67
TRINITY_DN13492_c0_g2	sp|O97860|PPA5_RABIT	ACP5	Tartrate-resistant acid phosphatase type 5 OS=Oryctolagus cuniculus GN=ACP5 PE=2 SV=1	45.2	1.2e-74
TRINITY_DN13492_c0_g4	sp|O97860|PPA5_RABIT	ACP5	Tartrate-resistant acid phosphatase type 5 OS=Oryctolagus cuniculus GN=ACP5 PE=2 SV=1	45.9	2.1e-36
TRINITY_DN13492_c0_g5	sp|P55859|PNPH_BOVIN	PNP	Purine nucleoside phosphorylase OS=Bos taurus GN=PNP PE=1 SV=3	54.3	1.5e-81
TRINITY_DN13494_c0_g1	sp|Q7ZXV3|ARP2B_XENLA	actr2-b	Actin-related protein 2-B OS=Xenopus laevis GN=actr2-b PE=2 SV=1	56	1.6e-128
TRINITY_DN13495_c0_g1	sp|Q9JJZ8|CNGA3_MOUSE	Cnga3	Cyclic nucleotide-gated cation channel alpha-3 OS=Mus musculus GN=Cnga3 PE=1 SV=2	51	6e-169
TRINITY_DN13502_c0_g1	sp|Q5ZM25|OLA1_CHICK	OLA1	Obg-like ATPase 1 OS=Gallus gallus GN=OLA1 PE=2 SV=1	74.1	3.4e-84
TRINITY_DN13503_c1_g14	sp|Q91VA6|PDIP2_MOUSE	Poldip2	Polymerase delta-interacting protein 2 OS=Mus musculus GN=Poldip2 PE=1 SV=1	52.3	8e-60
TRINITY_DN13508_c0_g1	sp|Q00577|PURA_HUMAN	PURA	Transcriptional activator protein Pur-alpha OS=Homo sapiens GN=PURA PE=1 SV=2	36.8	3.1e-20
TRINITY_DN13508_c0_g2	sp|Q28CH3|UAP1L_XENTR	uap1l1	UDP-N-acetylhexosamine pyrophosphorylase-like protein 1 OS=Xenopus tropicalis GN=uap1l1 PE=2 SV=1	55.7	6.5e-98
TRINITY_DN13510_c0_g2	sp|Q5I0R4|CK070_XENTR	-	Uncharacterized protein C11orf70 homolog OS=Xenopus tropicalis PE=2 SV=1	51.7	8e-51
TRINITY_DN13512_c1_g1	sp|Q9Y2U8|MAN1_HUMAN	LEMD3	Inner nuclear membrane protein Man1 OS=Homo sapiens GN=LEMD3 PE=1 SV=2	42.6	3.8e-30
TRINITY_DN13512_c1_g3	sp|Q8CH02|SUGP1_MOUSE	Sugp1	SURP and G-patch domain-containing protein 1 OS=Mus musculus GN=Sugp1 PE=1 SV=1	59.5	4.2e-32
TRINITY_DN13513_c0_g1	sp|P60815|FLVC2_RAT	Flvcr2	Feline leukemia virus subgroup C receptor-related protein 2 OS=Rattus norvegicus GN=Flvcr2 PE=2 SV=1	27.7	8.6e-46
TRINITY_DN13518_c0_g1	sp|Q9Z2A7|DGAT1_MOUSE	Dgat1	Diacylglycerol O-acyltransferase 1 OS=Mus musculus GN=Dgat1 PE=1 SV=1	57.2	1.4e-80
TRINITY_DN13520_c1_g7	sp|Q9NX08|COMD8_HUMAN	COMMD8	COMM domain-containing protein 8 OS=Homo sapiens GN=COMMD8 PE=1 SV=1	32.8	9.8e-23
TRINITY_DN13521_c0_g1	sp|P36412|RB11A_DICDI	rab11A	Ras-related protein Rab-11A OS=Dictyostelium discoideum GN=rab11A PE=1 SV=1	34.6	3.3e-15
TRINITY_DN13523_c0_g1	sp|P22599|A1AT2_MOUSE	Serpina1b	Alpha-1-antitrypsin 1-2 OS=Mus musculus GN=Serpina1b PE=1 SV=2	98.7	5.9e-81
TRINITY_DN13523_c0_g2	sp|Q00896|A1AT3_MOUSE	Serpina1c	Alpha-1-antitrypsin 1-3 OS=Mus musculus GN=Serpina1c PE=1 SV=2	100	6.9e-74
TRINITY_DN13526_c0_g1	sp|Q8N6T3|ARFG1_HUMAN	ARFGAP1	ADP-ribosylation factor GTPase-activating protein 1 OS=Homo sapiens GN=ARFGAP1 PE=1 SV=2	56.6	7.9e-33
TRINITY_DN13528_c0_g1	sp|Q9VR91|HERC2_DROME	HERC2	Probable E3 ubiquitin-protein ligase HERC2 OS=Drosophila melanogaster GN=HERC2 PE=1 SV=3	34.9	3e-31
TRINITY_DN13538_c0_g5	sp|O43156|TTI1_HUMAN	TTI1	TELO2-interacting protein 1 homolog OS=Homo sapiens GN=TTI1 PE=1 SV=3	37.3	6.2e-23
TRINITY_DN13540_c2_g6	sp|Q32L97|VAMP4_BOVIN	VAMP4	Vesicle-associated membrane protein 4 OS=Bos taurus GN=VAMP4 PE=2 SV=1	41.5	4.2e-16
TRINITY_DN13540_c3_g1	sp|Q8WVM7|STAG1_HUMAN	STAG1	Cohesin subunit SA-1 OS=Homo sapiens GN=STAG1 PE=1 SV=3	39.5	1.5e-201
TRINITY_DN13542_c0_g2	sp|Q3ZBE1|ARMC1_BOVIN	ARMC1	Armadillo repeat-containing protein 1 OS=Bos taurus GN=ARMC1 PE=2 SV=1	44.1	1.9e-24
TRINITY_DN13544_c0_g1	sp|Q8BK06|FBX9_MOUSE	Fbxo9	F-box only protein 9 OS=Mus musculus GN=Fbxo9 PE=1 SV=1	49.7	3.3e-46
TRINITY_DN13545_c1_g2	sp|Q8K268|ABCF3_MOUSE	Abcf3	ATP-binding cassette sub-family F member 3 OS=Mus musculus GN=Abcf3 PE=1 SV=1	54.2	1.1e-09
TRINITY_DN13550_c1_g5	sp|P16435|NCPR_HUMAN	POR	NADPH--cytochrome P450 reductase OS=Homo sapiens GN=POR PE=1 SV=2	54.8	7e-159
TRINITY_DN13557_c0_g1	sp|P35505|FAAA_MOUSE	Fah	Fumarylacetoacetase OS=Mus musculus GN=Fah PE=1 SV=2	61.9	6.9e-166
TRINITY_DN13559_c0_g1	sp|Q6DGV7|M17L2_DANRE	mpv17l2	Mpv17-like protein 2 OS=Danio rerio GN=mpv17l2 PE=2 SV=1	43.8	9.7e-34
TRINITY_DN13561_c1_g2	sp|O64411|PAO_MAIZE	PAO	Polyamine oxidase OS=Zea mays GN=PAO PE=1 SV=1	34.9	1.1e-64
TRINITY_DN13561_c1_g6	sp|Q460N5|PAR14_HUMAN	PARP14	Poly [ADP-ribose] polymerase 14 OS=Homo sapiens GN=PARP14 PE=1 SV=3	30.3	1.2e-90
TRINITY_DN13561_c1_g7	sp|P07850|SUOX_CHICK	SUOX	Sulfite oxidase OS=Gallus gallus GN=SUOX PE=1 SV=3	50.2	3.1e-135
TRINITY_DN13561_c2_g1	sp|Q561P5|MCM5_XENTR	mcm5	DNA replication licensing factor mcm5 OS=Xenopus tropicalis GN=mcm5 PE=2 SV=1	71.7	0
TRINITY_DN13565_c2_g3	sp|Q29RI9|MAT2B_BOVIN	MAT2B	Methionine adenosyltransferase 2 subunit beta OS=Bos taurus GN=MAT2B PE=2 SV=1	49.3	2.7e-74
TRINITY_DN13567_c3_g2	sp|P31430|DPEP1_RAT	Dpep1	Dipeptidase 1 OS=Rattus norvegicus GN=Dpep1 PE=2 SV=2	52	1.5e-95
TRINITY_DN13569_c0_g1	sp|Q9CR92|CCD96_MOUSE	Ccdc96	Coiled-coil domain-containing protein 96 OS=Mus musculus GN=Ccdc96 PE=2 SV=1	51.7	5.5e-39
TRINITY_DN13571_c1_g1	sp|Q06068|HSP97_STRPU	-	97 kDa heat shock protein OS=Strongylocentrotus purpuratus PE=1 SV=2	50.1	2.9e-195
TRINITY_DN13572_c0_g1	sp|P35915|HMGCL_CHICK	HMGCL	Hydroxymethylglutaryl-CoA lyase, mitochondrial OS=Gallus gallus GN=HMGCL PE=1 SV=1	72.6	3.4e-119
TRINITY_DN13578_c0_g1	sp|Q9Z2Z6|MCAT_MOUSE	Slc25a20	Mitochondrial carnitine/acylcarnitine carrier protein OS=Mus musculus GN=Slc25a20 PE=1 SV=1	36.1	3.6e-20
TRINITY_DN13578_c0_g3	sp|Q9Y619|ORNT1_HUMAN	SLC25A15	Mitochondrial ornithine transporter 1 OS=Homo sapiens GN=SLC25A15 PE=1 SV=1	45.4	2.4e-69
TRINITY_DN13585_c1_g1	sp|O14544|SOCS6_HUMAN	SOCS6	Suppressor of cytokine signaling 6 OS=Homo sapiens GN=SOCS6 PE=1 SV=2	58	9.6e-53
TRINITY_DN13585_c1_g2	sp|Q1LVE8|SF3B3_DANRE	sf3b3	Splicing factor 3B subunit 3 OS=Danio rerio GN=sf3b3 PE=2 SV=1	73.6	0
TRINITY_DN13586_c0_g1	sp|Q9Y2C4|EXOG_HUMAN	EXOG	Nuclease EXOG, mitochondrial OS=Homo sapiens GN=EXOG PE=1 SV=2	46.8	1e-41
TRINITY_DN13588_c0_g1	sp|Q9M8Z7|U80A2_ARATH	UGT80A2	Sterol 3-beta-glucosyltransferase UGT80A2 OS=Arabidopsis thaliana GN=UGT80A2 PE=1 SV=1	26.9	3.2e-24
TRINITY_DN13590_c0_g1	sp|P0C5H9|MANF_RAT	Manf	Mesencephalic astrocyte-derived neurotrophic factor OS=Rattus norvegicus GN=Manf PE=1 SV=1	55.2	1.6e-42
TRINITY_DN13590_c1_g1	sp|Q28CQ7|SUV92_XENTR	suv39h2	Histone-lysine N-methyltransferase SUV39H2 OS=Xenopus tropicalis GN=suv39h2 PE=2 SV=2	48.3	2.5e-67
TRINITY_DN13591_c0_g1	sp|P25985|PR1_PHAVU	-	Pathogenesis-related protein 1 OS=Phaseolus vulgaris PE=1 SV=2	66.2	2.9e-20
TRINITY_DN13592_c0_g1	sp|Q9LMX4|PPA1_ARATH	PAP1	Probable inactive purple acid phosphatase 1 OS=Arabidopsis thaliana GN=PAP1 PE=2 SV=1	35.1	1.2e-21
TRINITY_DN13592_c0_g2	sp|Q9H9Y2|RPF1_HUMAN	RPF1	Ribosome production factor 1 OS=Homo sapiens GN=RPF1 PE=1 SV=2	62	5.2e-89
TRINITY_DN13592_c0_g4	sp|Q9LMG7|PPA2_ARATH	PAP2	Probable inactive purple acid phosphatase 2 OS=Arabidopsis thaliana GN=PAP2 PE=2 SV=1	29.3	4.8e-48
TRINITY_DN13594_c0_g2	sp|Q6P3H7|RBBP4_DANRE	rbbp4	Histone-binding protein RBBP4 OS=Danio rerio GN=rbbp4 PE=2 SV=3	75.4	1.6e-160
TRINITY_DN13595_c0_g1	sp|P81178|ALDH2_MESAU	ALDH2	Aldehyde dehydrogenase, mitochondrial OS=Mesocricetus auratus GN=ALDH2 PE=1 SV=1	65.1	8.5e-90
TRINITY_DN13595_c0_g2	sp|P20000|ALDH2_BOVIN	ALDH2	Aldehyde dehydrogenase, mitochondrial OS=Bos taurus GN=ALDH2 PE=1 SV=2	73.4	1.2e-106
TRINITY_DN13597_c5_g1	sp|Q05974|RAB1A_LYMST	RAB1A	Ras-related protein Rab-1A OS=Lymnaea stagnalis GN=RAB1A PE=2 SV=1	51.8	2.1e-27
TRINITY_DN13597_c5_g3	sp|Q4PJX1|ODR4_MOUSE	Odr4	Protein odr-4 homolog OS=Mus musculus GN=Odr4 PE=1 SV=2	32.4	1.3e-15
TRINITY_DN13597_c6_g1	sp|Q9UGP5|DPOLL_HUMAN	POLL	DNA polymerase lambda OS=Homo sapiens GN=POLL PE=1 SV=1	54	2.1e-103
TRINITY_DN13599_c0_g1	sp|Q6PD21|SHB_MOUSE	Shb	SH2 domain-containing adapter protein B OS=Mus musculus GN=Shb PE=1 SV=2	45.8	2e-21
TRINITY_DN13601_c0_g1	sp|Q9NZS9|BFAR_HUMAN	BFAR	Bifunctional apoptosis regulator OS=Homo sapiens GN=BFAR PE=1 SV=1	25.6	5.1e-27
TRINITY_DN13602_c0_g1	sp|Q9Z2V9|CCNI_MOUSE	Ccni	Cyclin-I OS=Mus musculus GN=Ccni PE=2 SV=4	32.2	5.5e-15
TRINITY_DN13603_c0_g1	sp|P35546|RET_MOUSE	Ret	Proto-oncogene tyrosine-protein kinase receptor Ret OS=Mus musculus GN=Ret PE=1 SV=2	47.6	2.8e-47
TRINITY_DN13605_c5_g1	sp|Q3ZBG9|PLS2_BOVIN	PLSCR2	Phospholipid scramblase 2 OS=Bos taurus GN=PLSCR2 PE=2 SV=1	61.3	3.7e-77
TRINITY_DN13607_c0_g1	sp|Q58A42|DD3_DICDI	DD3-3	Protein DD3-3 OS=Dictyostelium discoideum GN=DD3-3 PE=2 SV=1	41.2	5.8e-114
TRINITY_DN13610_c1_g3	sp|Q3UDK1|TRAD1_MOUSE	Trafd1	TRAF-type zinc finger domain-containing protein 1 OS=Mus musculus GN=Trafd1 PE=1 SV=1	29.1	3.6e-07
TRINITY_DN13610_c1_g5	sp|Q8R2H7|TRAK2_RAT	Trak2	Trafficking kinesin-binding protein 2 OS=Rattus norvegicus GN=Trak2 PE=1 SV=2	29.7	1.1e-11
TRINITY_DN13611_c0_g1	sp|P91924|ARF_DUGJA	-	ADP-ribosylation factor OS=Dugesia japonica PE=2 SV=3	61.8	2.7e-57
TRINITY_DN13614_c1_g5	sp|Q6E2N3|TRI33_DANRE	trim33	E3 ubiquitin-protein ligase TRIM33 OS=Danio rerio GN=trim33 PE=2 SV=1	27	6.1e-21
TRINITY_DN13616_c0_g1	sp|Q5AF03|HSP31_CANAL	GLX3	Glyoxalase 3 OS=Candida albicans (strain SC5314 / ATCC MYA-2876) GN=GLX3 PE=1 SV=1	31.1	1.1e-20
TRINITY_DN13618_c0_g10	sp|P20825|POL2_DROME	pol	Retrovirus-related Pol polyprotein from transposon 297 OS=Drosophila melanogaster GN=pol PE=3 SV=1	37.9	4.1e-29
TRINITY_DN13618_c0_g4	sp|P04323|POL3_DROME	pol	Retrovirus-related Pol polyprotein from transposon 17.6 OS=Drosophila melanogaster GN=pol PE=3 SV=1	42	1.9e-71
TRINITY_DN13618_c0_g8	sp|P10394|POL4_DROME	POL	Retrovirus-related Pol polyprotein from transposon 412 OS=Drosophila melanogaster GN=POL PE=3 SV=1	41.2	2.7e-07
TRINITY_DN13625_c1_g8	sp|Q7WHJ0|ECTD_BORBR	ectD	Ectoine dioxygenase OS=Bordetella bronchiseptica (strain ATCC BAA-588 / NCTC 13252 / RB50) GN=ectD PE=3 SV=1	24.8	1.6e-11
TRINITY_DN13627_c0_g1	sp|P97873|LOXL1_MOUSE	Loxl1	Lysyl oxidase homolog 1 OS=Mus musculus GN=Loxl1 PE=2 SV=3	53.2	1.3e-35
TRINITY_DN13627_c0_g3	sp|Q8MJ24|LOXL4_BOVIN	LOXL4	Lysyl oxidase homolog 4 OS=Bos taurus GN=LOXL4 PE=2 SV=1	35.1	7.4e-106
TRINITY_DN13631_c0_g1	sp|Q9ULC3|RAB23_HUMAN	RAB23	Ras-related protein Rab-23 OS=Homo sapiens GN=RAB23 PE=1 SV=1	61.2	1.3e-71
TRINITY_DN13631_c1_g1	sp|Q62559|IFT52_MOUSE	Ift52	Intraflagellar transport protein 52 homolog OS=Mus musculus GN=Ift52 PE=1 SV=2	56	8.6e-93
TRINITY_DN13631_c1_g2	sp|P02362|RS7_XENLA	rps7	40S ribosomal protein S7 OS=Xenopus laevis GN=rps7 PE=2 SV=2	66.1	7.8e-67
TRINITY_DN13633_c1_g3	sp|Q5TAX3|TUT4_HUMAN	ZCCHC11	Terminal uridylyltransferase 4 OS=Homo sapiens GN=ZCCHC11 PE=1 SV=3	55.3	3.4e-17
TRINITY_DN13634_c6_g2	sp|O88736|DHB7_MOUSE	Hsd17b7	3-keto-steroid reductase OS=Mus musculus GN=Hsd17b7 PE=1 SV=1	40.6	5.1e-34
TRINITY_DN13636_c0_g1	sp|O61734|CYCL_DROME	cyc	Protein cycle OS=Drosophila melanogaster GN=cyc PE=1 SV=2	24.9	6.8e-24
TRINITY_DN13637_c0_g2	sp|O75319|DUS11_HUMAN	DUSP11	RNA/RNP complex-1-interacting phosphatase OS=Homo sapiens GN=DUSP11 PE=1 SV=1	38.9	7e-35
TRINITY_DN13641_c0_g1	sp|Q9D7V1|SH24A_MOUSE	Sh2d4a	SH2 domain-containing protein 4A OS=Mus musculus GN=Sh2d4a PE=1 SV=1	47.2	1.6e-17
TRINITY_DN13641_c0_g2	sp|O35344|IMA4_MOUSE	Kpna3	Importin subunit alpha-4 OS=Mus musculus GN=Kpna3 PE=1 SV=1	57.8	1.6e-68
TRINITY_DN13643_c1_g1	sp|Q0V9R4|CCD39_XENTR	ccdc39	Coiled-coil domain-containing protein 39 OS=Xenopus tropicalis GN=ccdc39 PE=2 SV=1	44.2	4.6e-53
TRINITY_DN13643_c3_g2	sp|Q6P3W7|SCYL2_HUMAN	SCYL2	SCY1-like protein 2 OS=Homo sapiens GN=SCYL2 PE=1 SV=1	47	2.2e-159
TRINITY_DN13643_c3_g3	sp|P54422|GGT_BACSU	ggt	Gamma-glutamyltranspeptidase OS=Bacillus subtilis (strain 168) GN=ggt PE=1 SV=1	30.2	7.9e-58
TRINITY_DN13643_c3_g4	sp|Q00341|VIGLN_HUMAN	HDLBP	Vigilin OS=Homo sapiens GN=HDLBP PE=1 SV=2	44.9	4.1e-73
TRINITY_DN13644_c0_g13	sp|Q32LN1|UBE2H_BOVIN	UBE2H	Ubiquitin-conjugating enzyme E2 H OS=Bos taurus GN=UBE2H PE=2 SV=1	76	3.2e-74
TRINITY_DN13644_c0_g2	sp|Q08B12|CTU2A_XENLA	ctu2-a	Cytoplasmic tRNA 2-thiolation protein 2-A OS=Xenopus laevis GN=ctu2-a PE=2 SV=1	28.5	8.4e-49
TRINITY_DN13650_c0_g1	sp|Q9P0U3|SENP1_HUMAN	SENP1	Sentrin-specific protease 1 OS=Homo sapiens GN=SENP1 PE=1 SV=2	41.4	2.1e-59
TRINITY_DN13654_c0_g3	sp|Q61214|DYR1A_MOUSE	Dyrk1a	Dual specificity tyrosine-phosphorylation-regulated kinase 1A OS=Mus musculus GN=Dyrk1a PE=1 SV=1	70.8	1.4e-160
TRINITY_DN13657_c0_g1	sp|P04412|EGFR_DROME	Egfr	Epidermal growth factor receptor OS=Drosophila melanogaster GN=Egfr PE=1 SV=3	27.7	6.3e-68
TRINITY_DN13658_c1_g3	sp|Q13887|KLF5_HUMAN	KLF5	Krueppel-like factor 5 OS=Homo sapiens GN=KLF5 PE=1 SV=2	47.5	1.2e-07
TRINITY_DN13659_c0_g1	sp|P11204|POL_EIAV9	pol	Pol polyprotein OS=Equine infectious anemia virus (isolate 1369) GN=pol PE=1 SV=1	46.9	1.6e-06
TRINITY_DN13660_c0_g1	sp|Q5E9T4|TPK1_BOVIN	TPK1	Thiamin pyrophosphokinase 1 OS=Bos taurus GN=TPK1 PE=2 SV=1	44.9	1.9e-38
TRINITY_DN13661_c0_g2	sp|Q02395|MTF2_MOUSE	Mtf2	Metal-response element-binding transcription factor 2 OS=Mus musculus GN=Mtf2 PE=1 SV=2	38.5	7.9e-21
TRINITY_DN13662_c3_g2	sp|Q9H237|PORCN_HUMAN	PORCN	Protein-serine O-palmitoleoyltransferase porcupine OS=Homo sapiens GN=PORCN PE=1 SV=2	39	2.4e-71
TRINITY_DN13662_c4_g1	sp|P80021|ATPA_PIG	ATP5A1	ATP synthase subunit alpha, mitochondrial OS=Sus scrofa GN=ATP5A1 PE=1 SV=2	80.3	3e-243
TRINITY_DN13665_c0_g1	sp|P80012|VWF_BOVIN	VWF	von Willebrand factor (Fragment) OS=Bos taurus GN=VWF PE=1 SV=2	25.2	1.9e-10
TRINITY_DN13666_c2_g2	sp|Q9D0B8|RIBC1_MOUSE	Ribc1	RIB43A-like with coiled-coils protein 1 OS=Mus musculus GN=Ribc1 PE=2 SV=1	41.8	4.7e-37
TRINITY_DN13666_c2_g4	sp|Q6DFU4|V26AB_XENLA	vps26a-b	Vacuolar protein sorting-associated protein 26A-B OS=Xenopus laevis GN=vps26a-b PE=2 SV=1	55.2	8.4e-93
TRINITY_DN13667_c0_g2	sp|Q9H0R1|AP5M1_HUMAN	AP5M1	AP-5 complex subunit mu-1 OS=Homo sapiens GN=AP5M1 PE=1 SV=2	36.1	2.1e-77
TRINITY_DN13671_c2_g1	sp|Q4R5T4|RNF32_MACFA	RNF32	RING finger protein 32 OS=Macaca fascicularis GN=RNF32 PE=2 SV=1	51.6	1.5e-47
TRINITY_DN13671_c2_g5	sp|O88967|YMEL1_MOUSE	Yme1l1	ATP-dependent zinc metalloprotease YME1L1 OS=Mus musculus GN=Yme1l1 PE=1 SV=1	57.7	5.9e-157
TRINITY_DN13671_c2_g8	sp|P52432|RPAC1_MOUSE	Polr1c	DNA-directed RNA polymerases I and III subunit RPAC1 OS=Mus musculus GN=Polr1c PE=1 SV=3	69	1.4e-33
TRINITY_DN13676_c1_g1	sp|Q59MN0|VAC8_CANAL	VAC8	Vacuolar protein 8 OS=Candida albicans (strain SC5314 / ATCC MYA-2876) GN=VAC8 PE=3 SV=3	32.7	1.8e-17
TRINITY_DN13676_c1_g2	sp|Q810W9|WHRN_RAT	Whrn	Whirlin OS=Rattus norvegicus GN=Whrn PE=1 SV=1	35.8	4.9e-64
TRINITY_DN13679_c0_g1	sp|P0C7P0|CISD3_HUMAN	CISD3	CDGSH iron-sulfur domain-containing protein 3, mitochondrial OS=Homo sapiens GN=CISD3 PE=1 SV=1	65.7	7.8e-07
TRINITY_DN13679_c0_g2	sp|Q9JK66|PRKN2_RAT	Park2	E3 ubiquitin-protein ligase parkin OS=Rattus norvegicus GN=Park2 PE=1 SV=1	54.6	4.7e-56
TRINITY_DN13680_c2_g1	sp|Q86YT6|MIB1_HUMAN	MIB1	E3 ubiquitin-protein ligase MIB1 OS=Homo sapiens GN=MIB1 PE=1 SV=1	50.7	3.5e-188
TRINITY_DN13682_c0_g1	sp|Q4U2R1|HERC2_MOUSE	Herc2	E3 ubiquitin-protein ligase HERC2 OS=Mus musculus GN=Herc2 PE=1 SV=3	32.8	1e-33
TRINITY_DN13686_c0_g2	sp|Q9P2E2|KIF17_HUMAN	KIF17	Kinesin-like protein KIF17 OS=Homo sapiens GN=KIF17 PE=2 SV=3	36.1	1.2e-120
TRINITY_DN13686_c0_g4	sp|Q9W1V3|FBRL_DROME	Fib	rRNA 2'-O-methyltransferase fibrillarin OS=Drosophila melanogaster GN=Fib PE=2 SV=1	83.8	2e-70
TRINITY_DN13686_c0_g6	sp|P22232|FBRL_XENLA	fbl	rRNA 2'-O-methyltransferase fibrillarin OS=Xenopus laevis GN=fbl PE=2 SV=1	79.1	3.4e-35
TRINITY_DN13689_c0_g1	sp|Q06AU2|RAP2A_PIG	RAP2A	Ras-related protein Rap-2a OS=Sus scrofa GN=RAP2A PE=2 SV=1	52.4	2.4e-50
TRINITY_DN13692_c0_g3	sp|Q5M8I4|TSSC1_XENTR	tssc1	Protein TSSC1 OS=Xenopus tropicalis GN=tssc1 PE=2 SV=1	45.8	3.6e-94
TRINITY_DN13692_c1_g3	sp|P11833|TBB_PARLI	-	Tubulin beta chain OS=Paracentrotus lividus PE=2 SV=1	98.8	2.1e-243
TRINITY_DN13692_c1_g4	sp|O35130|NEP1_MOUSE	Emg1	Ribosomal RNA small subunit methyltransferase NEP1 OS=Mus musculus GN=Emg1 PE=1 SV=1	66.5	3.3e-79
TRINITY_DN13694_c2_g2	sp|P58158|B3GA3_MOUSE	B3gat3	Galactosylgalactosylxylosylprotein 3-beta-glucuronosyltransferase 3 OS=Mus musculus GN=B3gat3 PE=1 SV=1	36.4	2e-33
TRINITY_DN13694_c3_g1	sp|O75689|ADAP1_HUMAN	ADAP1	Arf-GAP with dual PH domain-containing protein 1 OS=Homo sapiens GN=ADAP1 PE=1 SV=2	35.9	2.3e-54
TRINITY_DN13695_c3_g3	sp|Q9H9P8|L2HDH_HUMAN	L2HGDH	L-2-hydroxyglutarate dehydrogenase, mitochondrial OS=Homo sapiens GN=L2HGDH PE=1 SV=3	55.4	3.1e-84
TRINITY_DN13695_c3_g4	sp|Q99615|DNJC7_HUMAN	DNAJC7	DnaJ homolog subfamily C member 7 OS=Homo sapiens GN=DNAJC7 PE=1 SV=2	47.4	9e-117
TRINITY_DN13695_c3_g6	sp|Q8MZC4|CRLS1_DROME	CLS	Probable cardiolipin synthase (CMP-forming) OS=Drosophila melanogaster GN=CLS PE=2 SV=1	45.9	2e-21
TRINITY_DN13695_c3_g8	sp|A7SMW7|L2HDH_NEMVE	v1g172254	L-2-hydroxyglutarate dehydrogenase, mitochondrial OS=Nematostella vectensis GN=v1g172254 PE=3 SV=1	60.3	9.9e-45
TRINITY_DN13697_c3_g5	sp|Q6P8G1|ILF2_XENTR	ilf2	Interleukin enhancer-binding factor 2 homolog OS=Xenopus tropicalis GN=ilf2 PE=2 SV=1	35.3	1.1e-50
TRINITY_DN13697_c3_g9	sp|Q9BT88|SYT11_HUMAN	SYT11	Synaptotagmin-11 OS=Homo sapiens GN=SYT11 PE=1 SV=2	29	1.5e-07
TRINITY_DN13700_c0_g2	sp|Q8R151|ZNFX1_MOUSE	Znfx1	NFX1-type zinc finger-containing protein 1 OS=Mus musculus GN=Znfx1 PE=1 SV=3	33.5	1.6e-43
TRINITY_DN13701_c3_g3	sp|Q5EB28|MIDN_XENTR	midn	Midnolin OS=Xenopus tropicalis GN=midn PE=2 SV=1	29.6	1.9e-16
TRINITY_DN13701_c3_g5	sp|Q7ZY18|MC6ZB_XENLA	zmcm6-b	Zygotic DNA replication licensing factor mcm6-B OS=Xenopus laevis GN=zmcm6-b PE=1 SV=1	67	5.3e-151
TRINITY_DN13702_c0_g1	sp|Q9TRY9|BGAL_CANLF	GLB1	Beta-galactosidase OS=Canis lupus familiaris GN=GLB1 PE=2 SV=3	50.6	6.7e-172
TRINITY_DN13703_c0_g1	sp|Q3SWW9|PP1B_BOVIN	PPP1CB	Serine/threonine-protein phosphatase PP1-beta catalytic subunit OS=Bos taurus GN=PPP1CB PE=2 SV=1	84.7	2e-166
TRINITY_DN13705_c1_g2	sp|Q9UEY8|ADDG_HUMAN	ADD3	Gamma-adducin OS=Homo sapiens GN=ADD3 PE=1 SV=1	32.4	8.3e-50
TRINITY_DN13709_c3_g4	sp|Q9UNS1|TIM_HUMAN	TIMELESS	Protein timeless homolog OS=Homo sapiens GN=TIMELESS PE=1 SV=2	38.8	1.1e-48
TRINITY_DN13709_c3_g7	sp|Q8BLR9|HIF1N_MOUSE	Hif1an	Hypoxia-inducible factor 1-alpha inhibitor OS=Mus musculus GN=Hif1an PE=1 SV=2	38.3	6.8e-09
TRINITY_DN13710_c4_g3	sp|P04818|TYSY_HUMAN	TYMS	Thymidylate synthase OS=Homo sapiens GN=TYMS PE=1 SV=3	73.8	1.6e-125
TRINITY_DN13710_c4_g4	sp|Q9NRJ4|TULP4_HUMAN	TULP4	Tubby-related protein 4 OS=Homo sapiens GN=TULP4 PE=1 SV=2	30.9	8.2e-77
TRINITY_DN13713_c2_g2	sp|Q5NU14|MKRN1_TAKRU	mkrn1	Probable E3 ubiquitin-protein ligase makorin-1 OS=Takifugu rubripes GN=mkrn1 PE=2 SV=1	41.6	6e-69
TRINITY_DN13716_c2_g1	sp|Q5ZK10|NSF1C_CHICK	NSFL1C	NSFL1 cofactor p47 OS=Gallus gallus GN=NSFL1C PE=2 SV=1	44.5	1.9e-17
TRINITY_DN13716_c2_g2	sp|Q3SZC4|NSF1C_BOVIN	NSFL1C	NSFL1 cofactor p47 OS=Bos taurus GN=NSFL1C PE=2 SV=1	36.6	3.1e-14
TRINITY_DN13716_c2_g3	sp|Q5PQS0|PKHM1_RAT	Plekhm1	Pleckstrin homology domain-containing family M member 1 OS=Rattus norvegicus GN=Plekhm1 PE=1 SV=1	29.3	1.4e-15
TRINITY_DN13722_c0_g10	sp|Q4V8I4|DEFI8_RAT	Def8	Differentially expressed in FDCP 8 homolog OS=Rattus norvegicus GN=Def8 PE=1 SV=1	37.2	2.8e-63
TRINITY_DN13722_c0_g8	sp|P57286|SODM_BUCAI	sodA	Superoxide dismutase [Mn] OS=Buchnera aphidicola subsp. Acyrthosiphon pisum (strain APS) GN=sodA PE=3 SV=1	62.5	7.5e-09
TRINITY_DN13723_c0_g3	sp|Q9WY55|GCSH_THEMA	gcvH	Glycine cleavage system H protein OS=Thermotoga maritima (strain ATCC 43589 / MSB8 / DSM 3109 / JCM 10099) GN=gcvH PE=1 SV=1	49.2	2.3e-33
TRINITY_DN13729_c1_g2	sp|Q54JH4|P2XE_DICDI	p2xE	P2X receptor E OS=Dictyostelium discoideum GN=p2xE PE=3 SV=2	35	1.3e-17
TRINITY_DN13730_c0_g1	sp|Q6FN49|HSE1_CANGA	HSE1	Class E vacuolar protein-sorting machinery protein HSE1 OS=Candida glabrata (strain ATCC 2001 / CBS 138 / JCM 3761 / NBRC 0622 / NRRL Y-65) GN=HSE1 PE=3 SV=1	36.7	1.2e-06
TRINITY_DN13731_c2_g1	sp|F4IVI0|BUB1_ARATH	BUB1	Mitotic checkpoint serine/threonine-protein kinase BUB1 OS=Arabidopsis thaliana GN=BUB1 PE=1 SV=1	34.2	5.1e-38
TRINITY_DN13731_c3_g1	sp|Q05976|RB18A_LYMST	RAB18A	Ras-related protein Rab-18A OS=Lymnaea stagnalis GN=RAB18A PE=2 SV=1	73.9	1e-55
TRINITY_DN13737_c0_g1	sp|O14617|AP3D1_HUMAN	AP3D1	AP-3 complex subunit delta-1 OS=Homo sapiens GN=AP3D1 PE=1 SV=1	43.3	2.6e-38
TRINITY_DN13741_c0_g1	sp|Q9ET66|PI16_MOUSE	Pi16	Peptidase inhibitor 16 OS=Mus musculus GN=Pi16 PE=1 SV=1	47.3	8.4e-37
TRINITY_DN13742_c0_g2	sp|Q555L8|Y4695_DICDI	DDB_G0274695	SH3 and F-BAR domain-containing protein DDB_G0274695 OS=Dictyostelium discoideum GN=DDB_G0274695 PE=3 SV=1	24.2	1.1e-13
TRINITY_DN13743_c0_g1	sp|Q16U25|FAM50_AEDAE	AAEL010045	Protein FAM50 homolog OS=Aedes aegypti GN=AAEL010045 PE=3 SV=1	58.8	2e-90
TRINITY_DN13746_c3_g2	sp|Q92930|RAB8B_HUMAN	RAB8B	Ras-related protein Rab-8B OS=Homo sapiens GN=RAB8B PE=1 SV=2	57.5	1.2e-54
TRINITY_DN13747_c0_g4	sp|A1L0Y2|NEUL4_XENTR	neurl4	Neuralized-like protein 4 OS=Xenopus tropicalis GN=neurl4 PE=2 SV=1	34.2	5.9e-23
TRINITY_DN13748_c0_g3	sp|Q8HXY4|ODBA_MACFA	BCKDHA	2-oxoisovalerate dehydrogenase subunit alpha, mitochondrial OS=Macaca fascicularis GN=BCKDHA PE=2 SV=1	52.4	2e-112
TRINITY_DN13750_c1_g1	sp|O77761|SOAT1_MACFA	SOAT1	Sterol O-acyltransferase 1 OS=Macaca fascicularis GN=SOAT1 PE=2 SV=1	31.5	6.1e-49
TRINITY_DN13750_c1_g4	sp|Q8VC42|MIC1_MOUSE	Mic1	Uncharacterized protein C18orf8 homolog OS=Mus musculus GN=Mic1 PE=2 SV=1	36.9	5.6e-122
TRINITY_DN13761_c0_g2	sp|Q9P2E3|ZNFX1_HUMAN	ZNFX1	NFX1-type zinc finger-containing protein 1 OS=Homo sapiens GN=ZNFX1 PE=2 SV=2	29	1.7e-25
TRINITY_DN13762_c0_g1	sp|Q1ZXH8|GXCDD_DICDI	gxcDD	Guanine exchange factor for Rac 30 OS=Dictyostelium discoideum GN=gxcDD PE=3 SV=3	27.1	6.6e-13
TRINITY_DN13762_c0_g2	sp|Q8VC85|LSM1_MOUSE	Lsm1	U6 snRNA-associated Sm-like protein LSm1 OS=Mus musculus GN=Lsm1 PE=1 SV=1	58	7.8e-35
TRINITY_DN13764_c0_g2	sp|Q323Z6|RIBX_SHIBS	ybiA	N-glycosidase YbiA OS=Shigella boydii serotype 4 (strain Sb227) GN=ybiA PE=3 SV=1	52.3	1.4e-31
TRINITY_DN13767_c1_g3	sp|P27353|MEMA_METTR	mmoX	Methane monooxygenase component A alpha chain OS=Methylosinus trichosporium GN=mmoX PE=1 SV=4	33.9	1.6e-30
TRINITY_DN13768_c2_g10	sp|Q28DH2|TBPL2_XENTR	tbpl2	TATA box-binding protein-like protein 2 OS=Xenopus tropicalis GN=tbpl2 PE=2 SV=1	82.1	1.3e-88
TRINITY_DN13770_c0_g2	sp|Q7Z3E2|CC186_HUMAN	CCDC186	Coiled-coil domain-containing protein 186 OS=Homo sapiens GN=CCDC186 PE=1 SV=2	53.1	9.5e-30
TRINITY_DN13771_c0_g2	sp|Q9UR07|TF211_SCHPO	Tf2-11	Transposon Tf2-11 polyprotein OS=Schizosaccharomyces pombe (strain 972 / ATCC 24843) GN=Tf2-11 PE=3 SV=1	39.1	5.2e-10
TRINITY_DN13773_c1_g4	sp|Q96LB3|IFT74_HUMAN	IFT74	Intraflagellar transport protein 74 homolog OS=Homo sapiens GN=IFT74 PE=1 SV=1	50.5	1.4e-44
TRINITY_DN13773_c1_g5	sp|Q96LB3|IFT74_HUMAN	IFT74	Intraflagellar transport protein 74 homolog OS=Homo sapiens GN=IFT74 PE=1 SV=1	34.5	1.7e-17
TRINITY_DN13776_c4_g2	sp|Q9JM53|AIFM1_RAT	Aifm1	Apoptosis-inducing factor 1, mitochondrial OS=Rattus norvegicus GN=Aifm1 PE=1 SV=1	45.8	3.2e-121
TRINITY_DN13780_c0_g1	sp|Q54MR1|GLO2_DICDI	hagh	Hydroxyacylglutathione hydrolase OS=Dictyostelium discoideum GN=hagh PE=3 SV=1	26.9	5.6e-10
TRINITY_DN13784_c0_g1	sp|Q5RJQ4|SIR2_RAT	Sirt2	NAD-dependent protein deacetylase sirtuin-2 OS=Rattus norvegicus GN=Sirt2 PE=1 SV=1	52.8	5.1e-47
TRINITY_DN13785_c0_g1	sp|Q29RL2|CHRD1_BOVIN	CHORDC1	Cysteine and histidine-rich domain-containing protein 1 OS=Bos taurus GN=CHORDC1 PE=2 SV=1	48	5.2e-85
TRINITY_DN13786_c0_g3	sp|A8MVU1|NCF1C_HUMAN	NCF1C	Putative neutrophil cytosol factor 1C OS=Homo sapiens GN=NCF1C PE=5 SV=1	28.4	4.2e-21
TRINITY_DN13787_c0_g1	sp|Q3MHH4|SYQ_BOVIN	QARS	Glutamine--tRNA ligase OS=Bos taurus GN=QARS PE=2 SV=1	61.4	2.8e-276
TRINITY_DN13788_c0_g1	sp|Q8IW19|APLF_HUMAN	APLF	Aprataxin and PNK-like factor OS=Homo sapiens GN=APLF PE=1 SV=1	40.7	2.6e-17
TRINITY_DN13788_c0_g3	sp|P61022|CHP1_MOUSE	Chp1	Calcineurin B homologous protein 1 OS=Mus musculus GN=Chp1 PE=1 SV=2	38.5	3.7e-31
TRINITY_DN13789_c0_g2	sp|Q503V9|ENDUB_DANRE	endoub	Poly(U)-specific endoribonuclease-B OS=Danio rerio GN=endoub PE=2 SV=1	50.9	8e-73
TRINITY_DN13792_c0_g1	sp|P91891|MO25_DROME	Mo25	Protein Mo25 OS=Drosophila melanogaster GN=Mo25 PE=2 SV=2	64.9	1.4e-119
TRINITY_DN13794_c1_g1	sp|B1H369|HDAC8_XENTR	hdac8	Histone deacetylase 8 OS=Xenopus tropicalis GN=hdac8 PE=2 SV=1	39.4	3e-14
TRINITY_DN13795_c0_g1	sp|O15121|DEGS1_HUMAN	DEGS1	Sphingolipid delta(4)-desaturase DES1 OS=Homo sapiens GN=DEGS1 PE=1 SV=1	58.1	2.3e-107
TRINITY_DN13795_c0_g2	sp|Q2TBG7|ISCA2_BOVIN	ISCA2	Iron-sulfur cluster assembly 2 homolog, mitochondrial OS=Bos taurus GN=ISCA2 PE=2 SV=1	51.9	1.7e-32
TRINITY_DN13798_c2_g2	sp|Q32M08|DUS4L_MOUSE	Dus4l	tRNA-dihydrouridine(20a/20b) synthase [NAD(P)+]-like OS=Mus musculus GN=Dus4l PE=2 SV=1	44.8	3.3e-80
TRINITY_DN13800_c0_g1	sp|P11915|NLTP_RAT	Scp2	Non-specific lipid-transfer protein OS=Rattus norvegicus GN=Scp2 PE=1 SV=3	62.4	3.1e-119
TRINITY_DN13800_c0_g11	sp|Q55C09|SGMA_DICDI	sgmA	Sphingomyelin phosphodiesterase A OS=Dictyostelium discoideum GN=sgmA PE=3 SV=1	30.1	2.9e-68
TRINITY_DN13800_c0_g3	sp|Q14181|DPOA2_HUMAN	POLA2	DNA polymerase alpha subunit B OS=Homo sapiens GN=POLA2 PE=1 SV=2	33.3	2.1e-80
TRINITY_DN13800_c0_g4	sp|O23561|RAB1A_ARATH	RABB1A	Ras-related protein RABB1a OS=Arabidopsis thaliana GN=RABB1A PE=2 SV=1	31.4	6.6e-25
TRINITY_DN13800_c0_g6	sp|P55844|RL14_PEA	-	Probable 60S ribosomal protein L14 OS=Pisum sativum PE=2 SV=1	50.4	2.6e-27
TRINITY_DN13800_c0_g8	sp|Q5ZMH6|METL9_CHICK	METTL9	Methyltransferase-like protein 9 OS=Gallus gallus GN=METTL9 PE=2 SV=1	41.9	5.9e-49
TRINITY_DN13802_c2_g4	sp|Q91WR3|ASCC2_MOUSE	Ascc2	Activating signal cointegrator 1 complex subunit 2 OS=Mus musculus GN=Ascc2 PE=1 SV=1	31.8	2e-73
TRINITY_DN13802_c2_g7	sp|Q9CL21|RECQ_PASMU	recQ	ATP-dependent DNA helicase RecQ OS=Pasteurella multocida (strain Pm70) GN=recQ PE=3 SV=1	29.3	4.2e-39
TRINITY_DN13805_c0_g1	sp|Q8K368|FANCI_MOUSE	Fanci	Fanconi anemia group I protein homolog OS=Mus musculus GN=Fanci PE=1 SV=2	48.6	1.2e-10
TRINITY_DN13808_c3_g2	sp|Q3ZBV2|DD19A_BOVIN	DDX19A	ATP-dependent RNA helicase DDX19A OS=Bos taurus GN=DDX19A PE=2 SV=1	57.8	2e-153
TRINITY_DN13808_c4_g1	sp|Q6INU7|FRRS1_XENLA	frrs1	Putative ferric-chelate reductase 1 OS=Xenopus laevis GN=frrs1 PE=2 SV=1	23.5	3.2e-06
TRINITY_DN13811_c0_g1	sp|Q6DN90|IQEC1_HUMAN	IQSEC1	IQ motif and SEC7 domain-containing protein 1 OS=Homo sapiens GN=IQSEC1 PE=1 SV=1	41.7	7.1e-14
TRINITY_DN13811_c0_g4	sp|A5WW08|CHFR_DANRE	chfr	E3 ubiquitin-protein ligase CHFR OS=Danio rerio GN=chfr PE=2 SV=1	45.3	3.5e-27
TRINITY_DN13811_c0_g5	sp|P55212|CASP6_HUMAN	CASP6	Caspase-6 OS=Homo sapiens GN=CASP6 PE=1 SV=2	30.5	1.1e-10
TRINITY_DN13811_c0_g6	sp|Q8K1L5|PP1RB_MOUSE	Ppp1r11	Protein phosphatase 1 regulatory subunit 11 OS=Mus musculus GN=Ppp1r11 PE=1 SV=1	41.1	6.1e-13
TRINITY_DN13812_c0_g2	sp|Q15750|TAB1_HUMAN	TAB1	TGF-beta-activated kinase 1 and MAP3K7-binding protein 1 OS=Homo sapiens GN=TAB1 PE=1 SV=1	32.3	1.3e-08
TRINITY_DN13814_c1_g3	sp|A8C750|THADA_CANLF	THADA	Thyroid adenoma-associated protein homolog OS=Canis lupus familiaris GN=THADA PE=2 SV=1	29	1.1e-103
TRINITY_DN13818_c0_g1	sp|Q323Z6|RIBX_SHIBS	ybiA	N-glycosidase YbiA OS=Shigella boydii serotype 4 (strain Sb227) GN=ybiA PE=3 SV=1	52.1	3e-36
TRINITY_DN13819_c5_g2	sp|Q9BGI2|PRDX4_BOVIN	PRDX4	Peroxiredoxin-4 OS=Bos taurus GN=PRDX4 PE=2 SV=1	71.6	2e-93
TRINITY_DN13822_c0_g1	sp|P52583|VGFR2_COTJA	KDR	Vascular endothelial growth factor receptor 2 OS=Coturnix coturnix japonica GN=KDR PE=1 SV=1	33.7	1.4e-53
TRINITY_DN13828_c1_g1	sp|Q5EA28|CXXC1_BOVIN	CXXC1	CXXC-type zinc finger protein 1 OS=Bos taurus GN=CXXC1 PE=2 SV=1	46.7	4.3e-33
TRINITY_DN13828_c1_g3	sp|Q9UBJ2|ABCD2_HUMAN	ABCD2	ATP-binding cassette sub-family D member 2 OS=Homo sapiens GN=ABCD2 PE=1 SV=1	57.7	1.9e-226
TRINITY_DN13833_c1_g1	sp|B4JWA1|LIS1_DROGR	Lis-1	Lissencephaly-1 homolog OS=Drosophila grimshawi GN=Lis-1 PE=3 SV=1	74.6	8.3e-60
TRINITY_DN13834_c4_g4	sp|Q99KY4|GAK_MOUSE	Gak	Cyclin-G-associated kinase OS=Mus musculus GN=Gak PE=1 SV=2	40.7	1.4e-40
TRINITY_DN13835_c2_g1	sp|Q3SX41|LC7L3_BOVIN	LUC7L3	Luc7-like protein 3 OS=Bos taurus GN=LUC7L3 PE=2 SV=1	30.8	6.4e-31
TRINITY_DN13836_c2_g5	sp|P04323|POL3_DROME	pol	Retrovirus-related Pol polyprotein from transposon 17.6 OS=Drosophila melanogaster GN=pol PE=3 SV=1	50	2.4e-13
TRINITY_DN13836_c3_g1	sp|Q8BYH7|TBC17_MOUSE	Tbc1d17	TBC1 domain family member 17 OS=Mus musculus GN=Tbc1d17 PE=1 SV=2	44	3.3e-10
TRINITY_DN13837_c0_g1	sp|Q96AY4|TTC28_HUMAN	TTC28	Tetratricopeptide repeat protein 28 OS=Homo sapiens GN=TTC28 PE=1 SV=4	28	2.2e-24
TRINITY_DN13839_c2_g2	sp|Q1JQC1|MFSD1_BOVIN	MFSD1	Major facilitator superfamily domain-containing protein 1 OS=Bos taurus GN=MFSD1 PE=2 SV=1	38.3	4.6e-49
TRINITY_DN13840_c0_g2	sp|Q9BZE7|EVG1_HUMAN	C22orf23	UPF0193 protein EVG1 OS=Homo sapiens GN=C22orf23 PE=1 SV=1	38.3	1.8e-10
TRINITY_DN13841_c0_g1	sp|C5PCB1|SUB4A_COCP7	CPC735_066880	Subtilisin-like protease CPC735_066880 OS=Coccidioides posadasii (strain C735) GN=CPC735_066880 PE=3 SV=1	44.2	1.7e-15
TRINITY_DN13843_c1_g12	sp|Q5RC70|DJC11_PONAB	DNAJC11	DnaJ homolog subfamily C member 11 OS=Pongo abelii GN=DNAJC11 PE=2 SV=1	38.8	6e-97
TRINITY_DN13843_c1_g3	sp|Q9Z2Z9|GFPT2_MOUSE	Gfpt2	Glutamine--fructose-6-phosphate aminotransferase [isomerizing] 2 OS=Mus musculus GN=Gfpt2 PE=1 SV=3	63.5	1.5e-250
TRINITY_DN13846_c4_g3	sp|Q6ZQL4|WDR43_MOUSE	Wdr43	WD repeat-containing protein 43 OS=Mus musculus GN=Wdr43 PE=2 SV=2	37.3	4.8e-17
TRINITY_DN13846_c4_g9	sp|Q920L5|ELOV6_MOUSE	Elovl6	Elongation of very long chain fatty acids protein 6 OS=Mus musculus GN=Elovl6 PE=1 SV=1	39	2e-46
TRINITY_DN13847_c0_g3	sp|O35077|GPDA_RAT	Gpd1	Glycerol-3-phosphate dehydrogenase [NAD(+)], cytoplasmic OS=Rattus norvegicus GN=Gpd1 PE=1 SV=4	50	3.6e-104
TRINITY_DN13848_c1_g4	sp|Q2IA00|SPEF2_PIG	SPEF2	Sperm flagellar protein 2 OS=Sus scrofa GN=SPEF2 PE=2 SV=1	31.6	1.9e-34
TRINITY_DN13848_c1_g5	sp|Q28943|DPYD_PIG	DPYD	Dihydropyrimidine dehydrogenase [NADP(+)] OS=Sus scrofa GN=DPYD PE=1 SV=1	69.7	2.7e-167
TRINITY_DN13848_c1_g8	sp|Q6NYG8|DPYD_DANRE	dpyd	Dihydropyrimidine dehydrogenase [NADP(+)] OS=Danio rerio GN=dpyd PE=2 SV=1	70.7	2.4e-270
TRINITY_DN13852_c1_g2	sp|Q8IWF2|FXRD2_HUMAN	FOXRED2	FAD-dependent oxidoreductase domain-containing protein 2 OS=Homo sapiens GN=FOXRED2 PE=1 SV=1	50.4	1.5e-164
TRINITY_DN13854_c2_g3	sp|P63030|MPC1_MOUSE	Mpc1	Mitochondrial pyruvate carrier 1 OS=Mus musculus GN=Mpc1 PE=1 SV=1	63.8	5.6e-32
TRINITY_DN13854_c2_g4	sp|Q497Q6|F228B_MOUSE	Fam228b	Protein FAM228B OS=Mus musculus GN=Fam228b PE=2 SV=1	27.4	2.9e-14
TRINITY_DN13854_c2_g5	sp|Q0VGK2|TT39C_RAT	Ttc39c	Tetratricopeptide repeat protein 39C OS=Rattus norvegicus GN=Ttc39c PE=2 SV=1	33.3	2.4e-13
TRINITY_DN13855_c0_g1	sp|P78504|JAG1_HUMAN	JAG1	Protein jagged-1 OS=Homo sapiens GN=JAG1 PE=1 SV=3	53.5	1.9e-07
TRINITY_DN13856_c5_g1	sp|Q9D2U9|H2B3A_MOUSE	Hist3h2ba	Histone H2B type 3-A OS=Mus musculus GN=Hist3h2ba PE=1 SV=3	91.8	7.1e-17
TRINITY_DN13856_c5_g3	sp|Q9D2U9|H2B3A_MOUSE	Hist3h2ba	Histone H2B type 3-A OS=Mus musculus GN=Hist3h2ba PE=1 SV=3	91.8	2.1e-16
TRINITY_DN13857_c0_g1	sp|O75340|PDCD6_HUMAN	PDCD6	Programmed cell death protein 6 OS=Homo sapiens GN=PDCD6 PE=1 SV=1	43.2	1.4e-35
TRINITY_DN13857_c0_g2	sp|Q5PQ53|PEF1_XENLA	pef1	Peflin OS=Xenopus laevis GN=pef1 PE=1 SV=1	47.7	2.5e-46
TRINITY_DN13859_c0_g3	sp|Q8NEZ2|VP37A_HUMAN	VPS37A	Vacuolar protein sorting-associated protein 37A OS=Homo sapiens GN=VPS37A PE=1 SV=1	25.5	9.5e-23
TRINITY_DN13860_c0_g5	sp|K8FE10|SYT2_CAEEL	snt-2	Synaptotagmin 2 OS=Caenorhabditis elegans GN=snt-2 PE=1 SV=1	35.6	9e-13
TRINITY_DN13860_c1_g3	sp|Q6PDY2|AEDO_MOUSE	Ado	2-aminoethanethiol dioxygenase OS=Mus musculus GN=Ado PE=1 SV=2	33.2	1.4e-22
TRINITY_DN13860_c1_g4	sp|Q5U3V9|SNF8_DANRE	snf8	Vacuolar-sorting protein SNF8 OS=Danio rerio GN=snf8 PE=2 SV=2	61.5	4.1e-59
TRINITY_DN13861_c2_g4	sp|P41239|CSK_CHICK	CSK	Tyrosine-protein kinase CSK OS=Gallus gallus GN=CSK PE=2 SV=1	60.3	1.5e-19
TRINITY_DN13861_c3_g1	sp|Q63450|KCC1A_RAT	Camk1	Calcium/calmodulin-dependent protein kinase type 1 OS=Rattus norvegicus GN=Camk1 PE=1 SV=2	64.1	9.4e-111
TRINITY_DN13863_c0_g1	sp|Q66L42|M3K10_MOUSE	Map3k10	Mitogen-activated protein kinase kinase kinase 10 OS=Mus musculus GN=Map3k10 PE=1 SV=2	35.6	3.1e-39
TRINITY_DN13864_c0_g2	sp|Q8L9Y0|SCP25_ARATH	SCPL25	Serine carboxypeptidase-like 25 OS=Arabidopsis thaliana GN=SCPL25 PE=2 SV=2	42.1	8.9e-100
TRINITY_DN13865_c0_g1	sp|Q32KP2|LRC23_BOVIN	LRRC23	Leucine-rich repeat-containing protein 23 OS=Bos taurus GN=LRRC23 PE=2 SV=1	56.1	4.3e-34
TRINITY_DN13867_c1_g1	sp|Q2HJ10|ZNT2_MOUSE	Slc30a2	Zinc transporter 2 OS=Mus musculus GN=Slc30a2 PE=2 SV=1	54.4	1.3e-36
TRINITY_DN13875_c0_g2	sp|P57796|CABP4_HUMAN	CABP4	Calcium-binding protein 4 OS=Homo sapiens GN=CABP4 PE=1 SV=2	43.5	7.1e-06
TRINITY_DN13877_c0_g1	sp|Q7K0E3|MOB4_DROME	Mob4	MOB kinase activator-like 4 OS=Drosophila melanogaster GN=Mob4 PE=2 SV=1	70.6	4.8e-68
TRINITY_DN13877_c1_g6	sp|Q9DAK2|PACRG_MOUSE	Pacrg	Parkin coregulated gene protein homolog OS=Mus musculus GN=Pacrg PE=1 SV=1	86.9	3.2e-79
TRINITY_DN13878_c1_g1	sp|Q9WUU7|CATZ_MOUSE	Ctsz	Cathepsin Z OS=Mus musculus GN=Ctsz PE=1 SV=1	41.5	3.3e-48
TRINITY_DN13878_c1_g2	sp|P98194|AT2C1_HUMAN	ATP2C1	Calcium-transporting ATPase type 2C member 1 OS=Homo sapiens GN=ATP2C1 PE=1 SV=3	60	1.9e-292
TRINITY_DN13879_c2_g1	sp|P41732|TSN7_HUMAN	TSPAN7	Tetraspanin-7 OS=Homo sapiens GN=TSPAN7 PE=1 SV=2	36.6	7.5e-07
TRINITY_DN13879_c2_g6	sp|Q80UM7|MOGS_MOUSE	Mogs	Mannosyl-oligosaccharide glucosidase OS=Mus musculus GN=Mogs PE=1 SV=1	41.8	2.1e-175
TRINITY_DN13881_c1_g1	sp|P10394|POL4_DROME	POL	Retrovirus-related Pol polyprotein from transposon 412 OS=Drosophila melanogaster GN=POL PE=3 SV=1	29.4	3.1e-130
TRINITY_DN13883_c3_g12	sp|Q1GJX0|RL34_RUEST	rpmH	50S ribosomal protein L34 OS=Ruegeria sp. (strain TM1040) GN=rpmH PE=3 SV=1	76.9	2.2e-08
TRINITY_DN13883_c3_g2	sp|Q9D483|RPC3_MOUSE	Polr3c	DNA-directed RNA polymerase III subunit RPC3 OS=Mus musculus GN=Polr3c PE=1 SV=1	32.4	2.2e-18
TRINITY_DN13883_c3_g3	sp|Q6PJF5|RHDF2_HUMAN	RHBDF2	Inactive rhomboid protein 2 OS=Homo sapiens GN=RHBDF2 PE=1 SV=2	43.3	5.6e-59
TRINITY_DN13884_c4_g1	sp|Q5ZI57|TPPC3_CHICK	TRAPPC3	Trafficking protein particle complex subunit 3 OS=Gallus gallus GN=TRAPPC3 PE=2 SV=1	59	1.7e-07
TRINITY_DN13884_c4_g4	sp|O43617|TPPC3_HUMAN	TRAPPC3	Trafficking protein particle complex subunit 3 OS=Homo sapiens GN=TRAPPC3 PE=1 SV=1	61.2	6.6e-09
TRINITY_DN13884_c5_g2	sp|Q61ZF6|GBB1_CAEBR	gpb-1	Guanine nucleotide-binding protein subunit beta-1 OS=Caenorhabditis briggsae GN=gpb-1 PE=3 SV=1	34.8	3e-29
TRINITY_DN13891_c3_g1	sp|A7SDW5|EIF3L_NEMVE	v1g169424	Eukaryotic translation initiation factor 3 subunit L OS=Nematostella vectensis GN=v1g169424 PE=3 SV=1	54.9	7.1e-160
TRINITY_DN13893_c2_g1	sp|P38661|PDIA6_MEDSA	-	Probable protein disulfide-isomerase A6 OS=Medicago sativa PE=2 SV=1	51.2	5.5e-57
TRINITY_DN13893_c2_g2	sp|P38657|PDIA3_BOVIN	PDIA3	Protein disulfide-isomerase A3 OS=Bos taurus GN=PDIA3 PE=2 SV=1	44.8	1.3e-115
TRINITY_DN13893_c2_g3	sp|P09917|LOX5_HUMAN	ALOX5	Arachidonate 5-lipoxygenase OS=Homo sapiens GN=ALOX5 PE=1 SV=2	37.5	3.9e-131
TRINITY_DN13893_c3_g4	sp|Q9ER00|STX12_MOUSE	Stx12	Syntaxin-12 OS=Mus musculus GN=Stx12 PE=1 SV=1	27.3	2.2e-06
TRINITY_DN13894_c0_g1	sp|P27449|VATL_HUMAN	ATP6V0C	V-type proton ATPase 16 kDa proteolipid subunit OS=Homo sapiens GN=ATP6V0C PE=1 SV=1	89.6	5.8e-22
TRINITY_DN13896_c2_g2	sp|Q86IV4|Y4775_DICDI	DDB_G0274775	PH domain-containing protein DDB_G0274775 OS=Dictyostelium discoideum GN=DDB_G0274775 PE=3 SV=1	28.9	1.7e-06
TRINITY_DN13896_c2_g4	sp|Q3SWY9|RAB28_BOVIN	RAB28	Ras-related protein Rab-28 OS=Bos taurus GN=RAB28 PE=2 SV=1	55.1	3.2e-64
TRINITY_DN13897_c0_g1	sp|A6H639|TCTE1_MOUSE	Tcte1	T-complex-associated testis-expressed protein 1 OS=Mus musculus GN=Tcte1 PE=1 SV=1	37.2	2.7e-40
TRINITY_DN13897_c0_g2	sp|Q5E938|EIF1_BOVIN	EIF1	Eukaryotic translation initiation factor 1 OS=Bos taurus GN=EIF1 PE=3 SV=1	74	1e-39
TRINITY_DN13898_c3_g2	sp|Q8NFU5|IPMK_HUMAN	IPMK	Inositol polyphosphate multikinase OS=Homo sapiens GN=IPMK PE=1 SV=1	36.6	7.2e-20
TRINITY_DN13903_c0_g1	sp|Q63HN8|RN213_HUMAN	RNF213	E3 ubiquitin-protein ligase RNF213 OS=Homo sapiens GN=RNF213 PE=1 SV=3	53.8	7.5e-14
TRINITY_DN13905_c3_g1	sp|P43378|PTN9_HUMAN	PTPN9	Tyrosine-protein phosphatase non-receptor type 9 OS=Homo sapiens GN=PTPN9 PE=1 SV=1	39.6	1.5e-28
TRINITY_DN13907_c0_g2	sp|Q9JIZ9|PLS3_MOUSE	Plscr3	Phospholipid scramblase 3 OS=Mus musculus GN=Plscr3 PE=1 SV=1	30.8	6.8e-24
TRINITY_DN13910_c0_g1	sp|Q6NTZ6|FUT10_XENLA	fut10	Alpha-(1,3)-fucosyltransferase 10 OS=Xenopus laevis GN=fut10 PE=2 SV=2	41.2	9.6e-83
TRINITY_DN13911_c1_g1	sp|P35978|KINH_STRPU	-	Kinesin heavy chain OS=Strongylocentrotus purpuratus PE=2 SV=1	52.5	1.8e-96
TRINITY_DN13911_c1_g5	sp|Q502G5|CA050_DANRE	zgc:112255	Uncharacterized protein C1orf50 homolog OS=Danio rerio GN=zgc:112255 PE=2 SV=1	56.8	1.4e-44
TRINITY_DN13912_c0_g1	sp|P62998|RAC1_BOVIN	RAC1	Ras-related C3 botulinum toxin substrate 1 OS=Bos taurus GN=RAC1 PE=1 SV=1	71.9	1.2e-33
TRINITY_DN13912_c1_g1	sp|P62998|RAC1_BOVIN	RAC1	Ras-related C3 botulinum toxin substrate 1 OS=Bos taurus GN=RAC1 PE=1 SV=1	76.6	1.7e-88
TRINITY_DN13917_c0_g1	sp|Q9UN86|G3BP2_HUMAN	G3BP2	Ras GTPase-activating protein-binding protein 2 OS=Homo sapiens GN=G3BP2 PE=1 SV=2	27.6	4.4e-24
TRINITY_DN13919_c0_g1	sp|Q8K078|SO4A1_MOUSE	Slco4a1	Solute carrier organic anion transporter family member 4A1 OS=Mus musculus GN=Slco4a1 PE=1 SV=2	35.2	4.5e-100
TRINITY_DN13920_c0_g2	sp|Q58DU5|PSA3_BOVIN	PSMA3	Proteasome subunit alpha type-3 OS=Bos taurus GN=PSMA3 PE=1 SV=3	63.1	5e-93
TRINITY_DN13923_c0_g7	sp|Q9DC48|PRP17_MOUSE	Cdc40	Pre-mRNA-processing factor 17 OS=Mus musculus GN=Cdc40 PE=2 SV=1	60.4	3.1e-211
TRINITY_DN13928_c1_g4	sp|Q14315|FLNC_HUMAN	FLNC	Filamin-C OS=Homo sapiens GN=FLNC PE=1 SV=3	30.1	1.7e-51
TRINITY_DN13929_c0_g1	sp|P97819|PLPL9_MOUSE	Pla2g6	85/88 kDa calcium-independent phospholipase A2 OS=Mus musculus GN=Pla2g6 PE=1 SV=3	33.2	1.3e-22
TRINITY_DN13930_c3_g6	sp|Q8XMG8|ZUPT_CLOPE	zupT	Zinc transporter ZupT OS=Clostridium perfringens (strain 13 / Type A) GN=zupT PE=3 SV=1	54.2	1.2e-22
TRINITY_DN13930_c4_g3	sp|P70340|SMAD1_MOUSE	Smad1	Mothers against decapentaplegic homolog 1 OS=Mus musculus GN=Smad1 PE=1 SV=2	65.3	5.2e-172
TRINITY_DN13931_c3_g3	sp|Q80WA4|NOVA1_RAT	Nova1	RNA-binding protein Nova-1 (Fragment) OS=Rattus norvegicus GN=Nova1 PE=2 SV=1	26.7	1.2e-30
TRINITY_DN13936_c1_g1	sp|Q9Z2F6|BCL3_MOUSE	Bcl3	B-cell lymphoma 3 protein homolog OS=Mus musculus GN=Bcl3 PE=1 SV=2	32.4	5.4e-27
TRINITY_DN13936_c1_g2	sp|P49756|RBM25_HUMAN	RBM25	RNA-binding protein 25 OS=Homo sapiens GN=RBM25 PE=1 SV=3	56	2.7e-44
TRINITY_DN13936_c1_g3	sp|P49756|RBM25_HUMAN	RBM25	RNA-binding protein 25 OS=Homo sapiens GN=RBM25 PE=1 SV=3	40.4	1.6e-29
TRINITY_DN13937_c0_g1	sp|P52917|VPS4_YEAST	VPS4	Vacuolar protein sorting-associated protein 4 OS=Saccharomyces cerevisiae (strain ATCC 204508 / S288c) GN=VPS4 PE=1 SV=1	56.3	5.7e-15
TRINITY_DN13937_c0_g3	sp|Q09803|VPS4_SCHPO	vps4	Suppressor protein of bem1/bed5 double mutants OS=Schizosaccharomyces pombe (strain 972 / ATCC 24843) GN=vps4 PE=3 SV=1	49.4	4.9e-34
TRINITY_DN13937_c0_g4	sp|Q9UN37|VPS4A_HUMAN	VPS4A	Vacuolar protein sorting-associated protein 4A OS=Homo sapiens GN=VPS4A PE=1 SV=1	74.7	7.9e-26
TRINITY_DN13938_c0_g2	sp|P25325|THTM_HUMAN	MPST	3-mercaptopyruvate sulfurtransferase OS=Homo sapiens GN=MPST PE=1 SV=3	43.1	9.2e-69
TRINITY_DN13941_c1_g3	sp|A7RJI7|CCZ1_NEMVE	v1g238755	Vacuolar fusion protein CCZ1 homolog OS=Nematostella vectensis GN=v1g238755 PE=3 SV=1	38.6	2.5e-76
TRINITY_DN13941_c1_g5	sp|Q5ZKP2|MMAD_CHICK	MMADHC	Methylmalonic aciduria and homocystinuria type D homolog, mitochondrial OS=Gallus gallus GN=MMADHC PE=2 SV=1	58.6	8.2e-47
TRINITY_DN13942_c0_g3	sp|Q5ZL33|STRAP_CHICK	STRAP	Serine-threonine kinase receptor-associated protein OS=Gallus gallus GN=STRAP PE=2 SV=2	59.5	6.3e-107
TRINITY_DN13942_c0_g4	sp|Q8WUA2|PPIL4_HUMAN	PPIL4	Peptidyl-prolyl cis-trans isomerase-like 4 OS=Homo sapiens GN=PPIL4 PE=1 SV=1	64.4	2e-131
TRINITY_DN13944_c0_g1	sp|Q0P4P2|FBCD1_XENTR	fibcd1	Fibrinogen C domain-containing protein 1 OS=Xenopus tropicalis GN=fibcd1 PE=2 SV=1	42.5	2.2e-40
TRINITY_DN13945_c0_g3	sp|P62846|RS15_CHICK	RPS15	40S ribosomal protein S15 OS=Gallus gallus GN=RPS15 PE=2 SV=2	82.7	3.8e-43
TRINITY_DN13945_c1_g2	sp|Q8CGC7|SYEP_MOUSE	Eprs	Bifunctional glutamate/proline--tRNA ligase OS=Mus musculus GN=Eprs PE=1 SV=4	54.1	3.1e-249
TRINITY_DN13945_c1_g3	sp|P07814|SYEP_HUMAN	EPRS	Bifunctional glutamate/proline--tRNA ligase OS=Homo sapiens GN=EPRS PE=1 SV=5	69.6	2.3e-214
TRINITY_DN13946_c0_g1	sp|Q28IU1|DHB12_XENTR	hsd17b12	Very-long-chain 3-oxoacyl-CoA reductase OS=Xenopus tropicalis GN=hsd17b12 PE=2 SV=1	43.8	1.4e-59
TRINITY_DN13947_c0_g1	sp|Q24JV9|L3BPA_DANRE	lgals3bpa	Galectin-3-binding protein A OS=Danio rerio GN=lgals3bpa PE=2 SV=1	40.2	4.6e-12
TRINITY_DN13948_c2_g1	sp|P78524|ST5_HUMAN	ST5	Suppression of tumorigenicity 5 protein OS=Homo sapiens GN=ST5 PE=1 SV=3	40.6	6.9e-51
TRINITY_DN13948_c2_g3	sp|Q9I9A7|CDT1_XENLA	cdt1	DNA replication factor Cdt1 OS=Xenopus laevis GN=cdt1 PE=1 SV=2	42.6	2.5e-73
TRINITY_DN13949_c1_g3	sp|Q0MQG3|NDUS2_PONPY	NDUFS2	NADH dehydrogenase [ubiquinone] iron-sulfur protein 2, mitochondrial OS=Pongo pygmaeus GN=NDUFS2 PE=2 SV=1	71.5	9.4e-116
TRINITY_DN13949_c1_g5	sp|O13728|AIN1_SCHPO	ain1	Alpha-actinin-like protein 1 OS=Schizosaccharomyces pombe (strain 972 / ATCC 24843) GN=ain1 PE=1 SV=1	43.4	1.2e-12
TRINITY_DN13949_c1_g9	sp|Q641Y2|NDUS2_RAT	Ndufs2	NADH dehydrogenase [ubiquinone] iron-sulfur protein 2, mitochondrial OS=Rattus norvegicus GN=Ndufs2 PE=1 SV=1	64.6	4e-58
TRINITY_DN13950_c0_g15	sp|P05716|RT14_VICFA	RPS14	Ribosomal protein S14, mitochondrial OS=Vicia faba GN=RPS14 PE=3 SV=2	95.7	1.6e-30
TRINITY_DN13950_c0_g6	sp|P92558|NU1M_ARATH	ND1	NADH-ubiquinone oxidoreductase chain 1 OS=Arabidopsis thaliana GN=ND1 PE=1 SV=4	100	7.8e-22
TRINITY_DN13950_c0_g8	sp|P60620|COX1_ARATH	COX1	Cytochrome c oxidase subunit 1 OS=Arabidopsis thaliana GN=COX1 PE=3 SV=1	100	2.9e-50
TRINITY_DN13953_c0_g5	sp|A2SH04|RL20_METPP	rplT	50S ribosomal protein L20 OS=Methylibium petroleiphilum (strain ATCC BAA-1232 / LMG 22953 / PM1) GN=rplT PE=3 SV=1	88.1	2.4e-50
TRINITY_DN13953_c1_g2	sp|Q12788|TBL3_HUMAN	TBL3	Transducin beta-like protein 3 OS=Homo sapiens GN=TBL3 PE=1 SV=2	44.5	5.9e-31
TRINITY_DN13953_c2_g1	sp|Q8QZV1|PDE9A_RAT	Pde9a	High affinity cGMP-specific 3',5'-cyclic phosphodiesterase 9A OS=Rattus norvegicus GN=Pde9a PE=1 SV=1	61.2	3.7e-76
TRINITY_DN13954_c2_g1	sp|Q1RMW1|UBE2F_BOVIN	UBE2F	NEDD8-conjugating enzyme UBE2F OS=Bos taurus GN=UBE2F PE=2 SV=1	67.6	1.2e-22
TRINITY_DN13954_c3_g2	sp|Q5R573|RBL2A_PONAB	RABL2A	Rab-like protein 2A OS=Pongo abelii GN=RABL2A PE=2 SV=1	68.2	7.7e-59
TRINITY_DN13955_c1_g2	sp|Q6AZH6|FAF2A_XENLA	faf2-a	FAS-associated factor 2-A OS=Xenopus laevis GN=faf2-a PE=2 SV=1	40.9	1.4e-67
TRINITY_DN13957_c0_g1	sp|Q7XLY8|ATL41_ORYSJ	Os04g0590900	E3 ubiquitin-protein ligase Os04g0590900 OS=Oryza sativa subsp. japonica GN=Os04g0590900 PE=2 SV=2	38.5	2e-07
TRINITY_DN13962_c2_g7	sp|Q90240|CBPD_ANAPL	CPD	Carboxypeptidase D OS=Anas platyrhynchos GN=CPD PE=1 SV=1	57.3	8.6e-113
TRINITY_DN13963_c0_g3	sp|Q5RCG0|TPC13_PONAB	TRAPPC13	Trafficking protein particle complex subunit 13 OS=Pongo abelii GN=TRAPPC13 PE=2 SV=1	38.8	2.4e-56
TRINITY_DN13966_c0_g2	sp|O60524|NEMF_HUMAN	NEMF	Nuclear export mediator factor NEMF OS=Homo sapiens GN=NEMF PE=1 SV=4	50.8	3.2e-110
TRINITY_DN13969_c0_g1	sp|A8E657|AASS_BOVIN	AASS	Alpha-aminoadipic semialdehyde synthase, mitochondrial OS=Bos taurus GN=AASS PE=2 SV=1	47.4	3.1e-106
TRINITY_DN13969_c1_g2	sp|Q86VX2|COMD7_HUMAN	COMMD7	COMM domain-containing protein 7 OS=Homo sapiens GN=COMMD7 PE=1 SV=2	47.1	8.1e-42
TRINITY_DN1396_c0_g1	sp|Q3UKC1|TAXB1_MOUSE	Tax1bp1	Tax1-binding protein 1 homolog OS=Mus musculus GN=Tax1bp1 PE=1 SV=2	35.9	4.4e-17
TRINITY_DN13971_c3_g3	sp|P16254|SRP14_MOUSE	Srp14	Signal recognition particle 14 kDa protein OS=Mus musculus GN=Srp14 PE=1 SV=1	64.4	2.3e-27
TRINITY_DN13971_c4_g10	sp|Q8IVD9|NUDC3_HUMAN	NUDCD3	NudC domain-containing protein 3 OS=Homo sapiens GN=NUDCD3 PE=1 SV=3	43.4	4.5e-24
TRINITY_DN13971_c4_g11	sp|P25975|CATL1_BOVIN	CTSL	Cathepsin L1 OS=Bos taurus GN=CTSL PE=1 SV=3	54.2	8.4e-95
TRINITY_DN13971_c4_g3	sp|O54992|MAPK5_MOUSE	Mapkapk5	MAP kinase-activated protein kinase 5 OS=Mus musculus GN=Mapkapk5 PE=1 SV=1	42.5	3.3e-105
TRINITY_DN13971_c4_g5	sp|Q94519|ACPM_DROME	ND-ACP	Acyl carrier protein, mitochondrial OS=Drosophila melanogaster GN=ND-ACP PE=2 SV=1	52.3	2.2e-17
TRINITY_DN13973_c4_g2	sp|A5PJZ5|NUP93_BOVIN	NUP93	Nuclear pore complex protein Nup93 OS=Bos taurus GN=NUP93 PE=2 SV=1	48.6	6e-224
TRINITY_DN13977_c0_g2	sp|Q9XWZ2|ACD11_CAEEL	acdh-11	Acyl-CoA dehydrogenase family member 11 OS=Caenorhabditis elegans GN=acdh-11 PE=1 SV=1	44.3	6.6e-25
TRINITY_DN13978_c2_g3	sp|A2TLM1|RPIA_PIG	RPIA	Ribose-5-phosphate isomerase OS=Sus scrofa GN=RPIA PE=2 SV=1	59.8	5.2e-74
TRINITY_DN13979_c1_g6	sp|Q09575|YRD6_CAEEL	K02A2.6	Uncharacterized protein K02A2.6 OS=Caenorhabditis elegans GN=K02A2.6 PE=3 SV=1	37.6	5.7e-45
TRINITY_DN13980_c0_g1	sp|Q86W24|NAL14_HUMAN	NLRP14	NACHT, LRR and PYD domains-containing protein 14 OS=Homo sapiens GN=NLRP14 PE=1 SV=1	22.8	1.5e-10
TRINITY_DN13982_c0_g1	sp|P15206|CCNB_MARGL	-	G2/mitotic-specific cyclin-B OS=Marthasterias glacialis PE=2 SV=1	56.4	1.9e-83
TRINITY_DN13983_c2_g1	sp|B5XAM2|ICT1_SALSA	mrpl58	Peptidyl-tRNA hydrolase ICT1, mitochondrial OS=Salmo salar GN=mrpl58 PE=2 SV=1	29.5	2.7e-09
TRINITY_DN13983_c3_g2	sp|Q8BXG3|IFT57_MOUSE	Ift57	Intraflagellar transport protein 57 homolog OS=Mus musculus GN=Ift57 PE=1 SV=1	45.5	3.9e-71
TRINITY_DN13984_c0_g1	sp|Q9BRL6|SRSF8_HUMAN	SRSF8	Serine/arginine-rich splicing factor 8 OS=Homo sapiens GN=SRSF8 PE=1 SV=1	41.6	1.5e-09
TRINITY_DN13986_c0_g2	sp|Q46EH1|MSRB_METBF	msrB	Peptide methionine sulfoxide reductase MsrB OS=Methanosarcina barkeri (strain Fusaro / DSM 804) GN=msrB PE=3 SV=1	52.8	4.4e-27
TRINITY_DN13986_c0_g6	sp|Q6NX31|MCM7_XENTR	mcm7	DNA replication licensing factor mcm7 OS=Xenopus tropicalis GN=mcm7 PE=2 SV=1	68.3	1.3e-286
TRINITY_DN13987_c2_g1	sp|Q6NY52|THOC5_DANRE	thoc5	THO complex subunit 5 homolog OS=Danio rerio GN=thoc5 PE=2 SV=1	35.7	6.6e-85
TRINITY_DN13987_c2_g16	sp|Q6ME43|RS11_PARUW	rpsK	30S ribosomal protein S11 OS=Protochlamydia amoebophila (strain UWE25) GN=rpsK PE=3 SV=1	57.1	1e-14
TRINITY_DN13987_c2_g3	sp|Q74FW6|TSAL_GEOSL	tdcB	L-threonine ammonia-lyase OS=Geobacter sulfurreducens (strain ATCC 51573 / DSM 12127 / PCA) GN=tdcB PE=1 SV=1	40.1	9.9e-67
TRINITY_DN13987_c2_g9	sp|Q7YJU5|RR11_CALFG	rps11	30S ribosomal protein S11, chloroplastic OS=Calycanthus floridus var. glaucus GN=rps11 PE=3 SV=1	47.7	3.5e-08
TRINITY_DN13990_c1_g1	sp|O15978|WNT5_HALRO	WNT5	Protein Wnt-5 OS=Halocynthia roretzi GN=WNT5 PE=3 SV=1	42.5	1.3e-30
TRINITY_DN13990_c3_g3	sp|Q8K2C8|GPAT4_MOUSE	Gpat4	Glycerol-3-phosphate acyltransferase 4 OS=Mus musculus GN=Gpat4 PE=1 SV=1	49.3	1.2e-90
TRINITY_DN13992_c0_g3	sp|Q8MZJ6|SRP54_GEOCY	SRP54	Signal recognition particle 54 kDa protein OS=Geodia cydonium GN=SRP54 PE=2 SV=1	86	1.1e-230
TRINITY_DN13994_c4_g1	sp|Q9VTJ8|TIM14_DROME	Tim14	Mitochondrial import inner membrane translocase subunit TIM14 OS=Drosophila melanogaster GN=Tim14 PE=3 SV=2	49.5	1.4e-22
TRINITY_DN13994_c4_g2	sp|P11018|ISP1_BACSU	isp	Major intracellular serine protease OS=Bacillus subtilis (strain 168) GN=isp PE=1 SV=2	31.4	8.2e-20
TRINITY_DN13994_c6_g3	sp|Q05793|PGBM_MOUSE	Hspg2	Basement membrane-specific heparan sulfate proteoglycan core protein OS=Mus musculus GN=Hspg2 PE=1 SV=1	29.4	2.9e-51
TRINITY_DN13994_c6_g4	sp|Q05793|PGBM_MOUSE	Hspg2	Basement membrane-specific heparan sulfate proteoglycan core protein OS=Mus musculus GN=Hspg2 PE=1 SV=1	37.5	3.7e-14
TRINITY_DN13996_c1_g4	sp|Q8VHX6|FLNC_MOUSE	Flnc	Filamin-C OS=Mus musculus GN=Flnc PE=1 SV=3	30.9	1.5e-66
TRINITY_DN13997_c0_g1	sp|Q9GZU7|CTDS1_HUMAN	CTDSP1	Carboxy-terminal domain RNA polymerase II polypeptide A small phosphatase 1 OS=Homo sapiens GN=CTDSP1 PE=1 SV=1	75.6	2.5e-52
TRINITY_DN13999_c1_g1	sp|Q9P1Y6|PHRF1_HUMAN	PHRF1	PHD and RING finger domain-containing protein 1 OS=Homo sapiens GN=PHRF1 PE=1 SV=3	45.7	1.6e-33
TRINITY_DN13999_c1_g2	sp|E9Q5F9|SETD2_MOUSE	Setd2	Histone-lysine N-methyltransferase SETD2 OS=Mus musculus GN=Setd2 PE=1 SV=1	32	1.9e-24
TRINITY_DN13999_c2_g1	sp|Q9NVD7|PARVA_HUMAN	PARVA	Alpha-parvin OS=Homo sapiens GN=PARVA PE=1 SV=1	41.7	1.5e-31
TRINITY_DN13999_c2_g4	sp|Q3V1U8|ELMD1_MOUSE	Elmod1	ELMO domain-containing protein 1 OS=Mus musculus GN=Elmod1 PE=1 SV=2	30.7	3e-38
TRINITY_DN14000_c0_g1	sp|O86034|BDHA_RHIME	bdhA	D-beta-hydroxybutyrate dehydrogenase OS=Rhizobium meliloti (strain 1021) GN=bdhA PE=1 SV=1	50.6	9e-66
TRINITY_DN14003_c0_g1	sp|Q6DHR3|RG1BA_DANRE	rasgef1ba	Ras-GEF domain-containing family member 1B-A OS=Danio rerio GN=rasgef1ba PE=2 SV=2	43.5	2.1e-68
TRINITY_DN14003_c0_g10	sp|Q6DHR3|RG1BA_DANRE	rasgef1ba	Ras-GEF domain-containing family member 1B-A OS=Danio rerio GN=rasgef1ba PE=2 SV=2	46.7	1.2e-26
TRINITY_DN14003_c0_g5	sp|Q8TC29|ENKUR_HUMAN	ENKUR	Enkurin OS=Homo sapiens GN=ENKUR PE=2 SV=1	49.5	3.7e-24
TRINITY_DN14008_c0_g3	sp|Q8K0H1|S47A1_MOUSE	Slc47a1	Multidrug and toxin extrusion protein 1 OS=Mus musculus GN=Slc47a1 PE=1 SV=2	43.9	4.8e-30
TRINITY_DN14008_c0_g5	sp|Q7TSQ8|PDPR_MOUSE	Pdpr	Pyruvate dehydrogenase phosphatase regulatory subunit, mitochondrial OS=Mus musculus GN=Pdpr PE=1 SV=1	40.3	4.1e-183
TRINITY_DN14008_c0_g6	sp|Q8IU60|DCP2_HUMAN	DCP2	m7GpppN-mRNA hydrolase OS=Homo sapiens GN=DCP2 PE=1 SV=2	37.7	3.3e-56
TRINITY_DN14008_c0_g7	sp|Q75Q39|TOM70_RAT	Tomm70	Mitochondrial import receptor subunit TOM70 OS=Rattus norvegicus GN=Tomm70 PE=1 SV=1	26.4	1.3e-53
TRINITY_DN14009_c2_g1	sp|Q5R3Z8|FBXL2_PONAB	FBXL2	F-box/LRR-repeat protein 2 OS=Pongo abelii GN=FBXL2 PE=2 SV=1	60.2	1.3e-29
TRINITY_DN14009_c2_g2	sp|P28838|AMPL_HUMAN	LAP3	Cytosol aminopeptidase OS=Homo sapiens GN=LAP3 PE=1 SV=3	56.2	1.1e-137
TRINITY_DN14010_c1_g1	sp|Q9Z1Z1|E2AK3_RAT	Eif2ak3	Eukaryotic translation initiation factor 2-alpha kinase 3 OS=Rattus norvegicus GN=Eif2ak3 PE=1 SV=1	34.7	3.1e-28
TRINITY_DN14010_c2_g1	sp|Q05B56|TF2H3_BOVIN	GTF2H3	General transcription factor IIH subunit 3 OS=Bos taurus GN=GTF2H3 PE=2 SV=1	42.7	5.7e-63
TRINITY_DN14010_c2_g4	sp|Q6PE18|P4K2A_DANRE	pi4k2a	Phosphatidylinositol 4-kinase type 2-alpha OS=Danio rerio GN=pi4k2a PE=2 SV=1	48.8	1.4e-110
TRINITY_DN14012_c1_g2	sp|Q6A070|CREC1_MOUSE	Fam179b	Crescerin-1 OS=Mus musculus GN=Fam179b PE=1 SV=3	36	7.2e-76
TRINITY_DN14012_c1_g4	sp|Q58D34|PI16_BOVIN	PI16	Peptidase inhibitor 16 OS=Bos taurus GN=PI16 PE=2 SV=1	42.2	1.2e-33
TRINITY_DN14013_c1_g1	sp|Q02874|H2AY_RAT	H2afy	Core histone macro-H2A.1 OS=Rattus norvegicus GN=H2afy PE=1 SV=4	47.8	2.1e-39
TRINITY_DN14016_c2_g3	sp|Q9VQG4|COLT_DROME	colt	Congested-like trachea protein OS=Drosophila melanogaster GN=colt PE=2 SV=1	53.9	2.9e-92
TRINITY_DN14017_c1_g3	sp|Q9BXJ9|NAA15_HUMAN	NAA15	N-alpha-acetyltransferase 15, NatA auxiliary subunit OS=Homo sapiens GN=NAA15 PE=1 SV=1	53.9	8.3e-240
TRINITY_DN14017_c1_g4	sp|Q86KC1|LYSG2_DICDI	DDB_G0274181	Probable GH family 25 lysozyme 2 OS=Dictyostelium discoideum GN=DDB_G0274181 PE=3 SV=1	53.9	8.6e-52
TRINITY_DN14019_c4_g1	sp|Q8BZM0|KLH12_MOUSE	Klhl12	Kelch-like protein 12 OS=Mus musculus GN=Klhl12 PE=2 SV=1	36	5.3e-52
TRINITY_DN14020_c0_g2	sp|Q969V4|TEKT1_HUMAN	TEKT1	Tektin-1 OS=Homo sapiens GN=TEKT1 PE=1 SV=1	37	1.5e-64
TRINITY_DN14020_c1_g2	sp|Q9UGM3|DMBT1_HUMAN	DMBT1	Deleted in malignant brain tumors 1 protein OS=Homo sapiens GN=DMBT1 PE=1 SV=2	31.3	5e-110
TRINITY_DN14020_c1_g4	sp|Q9Y6A2|CP46A_HUMAN	CYP46A1	Cholesterol 24-hydroxylase OS=Homo sapiens GN=CYP46A1 PE=1 SV=1	30.2	1.4e-61
TRINITY_DN14023_c3_g1	sp|Q96Q07|BTBD9_HUMAN	BTBD9	BTB/POZ domain-containing protein 9 OS=Homo sapiens GN=BTBD9 PE=1 SV=2	52	1.1e-173
TRINITY_DN14028_c0_g1	sp|Q7Z7E8|UB2Q1_HUMAN	UBE2Q1	Ubiquitin-conjugating enzyme E2 Q1 OS=Homo sapiens GN=UBE2Q1 PE=1 SV=1	31.1	9e-15
TRINITY_DN14028_c1_g1	sp|F4K4C5|KN14S_ARATH	KIN14S	Kinesin-like protein KIN-14S OS=Arabidopsis thaliana GN=KIN14S PE=3 SV=1	38.8	1e-80
TRINITY_DN1402_c0_g1	sp|A5PJI7|EI2BG_BOVIN	EIF2B3	Translation initiation factor eIF-2B subunit gamma OS=Bos taurus GN=EIF2B3 PE=2 SV=1	31.7	4.6e-27
TRINITY_DN14030_c4_g1	sp|Q5RFF8|NLE1_PONAB	NLE1	Notchless protein homolog 1 OS=Pongo abelii GN=NLE1 PE=2 SV=3	62.3	3e-43
TRINITY_DN14030_c6_g3	sp|Q7ZXK9|NLE1_XENLA	nle1	Notchless protein homolog 1 OS=Xenopus laevis GN=nle1 PE=2 SV=1	69.2	5.4e-48
TRINITY_DN14031_c0_g1	sp|Q38SD2|LRRK1_HUMAN	LRRK1	Leucine-rich repeat serine/threonine-protein kinase 1 OS=Homo sapiens GN=LRRK1 PE=1 SV=3	30.9	3.9e-30
TRINITY_DN14031_c0_g3	sp|Q3UHC2|LRRK1_MOUSE	Lrrk1	Leucine-rich repeat serine/threonine-protein kinase 1 OS=Mus musculus GN=Lrrk1 PE=1 SV=1	29.1	2.4e-87
TRINITY_DN14032_c0_g5	sp|P49735|MCM2_DROME	Mcm2	DNA replication licensing factor Mcm2 OS=Drosophila melanogaster GN=Mcm2 PE=1 SV=1	63.6	7e-63
TRINITY_DN14034_c0_g2	sp|Q6GQV7|EDRF1_MOUSE	Edrf1	Erythroid differentiation-related factor 1 OS=Mus musculus GN=Edrf1 PE=1 SV=1	37.7	2e-16
TRINITY_DN14034_c0_g3	sp|Q6WV19|GALT2_DROME	pgant2	Polypeptide N-acetylgalactosaminyltransferase 2 OS=Drosophila melanogaster GN=pgant2 PE=2 SV=2	45.1	3.6e-116
TRINITY_DN14036_c3_g1	sp|Q9UHB9|SRP68_HUMAN	SRP68	Signal recognition particle subunit SRP68 OS=Homo sapiens GN=SRP68 PE=1 SV=2	40.6	1.1e-121
TRINITY_DN14040_c0_g1	sp|Q9HB40|RISC_HUMAN	SCPEP1	Retinoid-inducible serine carboxypeptidase OS=Homo sapiens GN=SCPEP1 PE=1 SV=1	61	3.6e-61
TRINITY_DN14045_c0_g1	sp|D4AS41|A7056_ARTBC	ARB_07056	Uncharacterized FAD-linked oxidoreductase ARB_02478 OS=Arthroderma benhamiae (strain ATCC MYA-4681 / CBS 112371) GN=ARB_07056 PE=1 SV=2	34.7	4.5e-70
TRINITY_DN14045_c1_g11	sp|D4AS41|A7056_ARTBC	ARB_07056	Uncharacterized FAD-linked oxidoreductase ARB_02478 OS=Arthroderma benhamiae (strain ATCC MYA-4681 / CBS 112371) GN=ARB_07056 PE=1 SV=2	41.4	6.4e-28
TRINITY_DN14045_c1_g2	sp|B8AY58|VLN1_ORYSI	VLN1	Villin-1 OS=Oryza sativa subsp. indica GN=VLN1 PE=3 SV=1	26.6	2.8e-25
TRINITY_DN14045_c1_g4	sp|D4AS41|A7056_ARTBC	ARB_07056	Uncharacterized FAD-linked oxidoreductase ARB_02478 OS=Arthroderma benhamiae (strain ATCC MYA-4681 / CBS 112371) GN=ARB_07056 PE=1 SV=2	32.9	1.2e-29
TRINITY_DN14046_c4_g5	sp|A7MB10|RRP5_BOVIN	PDCD11	Protein RRP5 homolog OS=Bos taurus GN=PDCD11 PE=2 SV=1	32.6	1.6e-207
TRINITY_DN14051_c2_g3	sp|P0C0A3|CHMP6_MOUSE	Chmp6	Charged multivesicular body protein 6 OS=Mus musculus GN=Chmp6 PE=1 SV=2	60.9	2.3e-50
TRINITY_DN14052_c0_g4	sp|P23919|KTHY_HUMAN	DTYMK	Thymidylate kinase OS=Homo sapiens GN=DTYMK PE=1 SV=4	49.3	6.6e-54
TRINITY_DN14054_c0_g4	sp|Q02PA2|LAP_PSEAB	lap	Aminopeptidase OS=Pseudomonas aeruginosa (strain UCBPP-PA14) GN=lap PE=1 SV=1	41.9	2.7e-46
TRINITY_DN14055_c3_g1	sp|Q9D8B1|AIG1_MOUSE	Aig1	Androgen-induced gene 1 protein OS=Mus musculus GN=Aig1 PE=2 SV=1	34.9	1.1e-24
TRINITY_DN14055_c3_g3	sp|Q8VDZ4|ZDHC5_MOUSE	Zdhhc5	Palmitoyltransferase ZDHHC5 OS=Mus musculus GN=Zdhhc5 PE=1 SV=1	48.4	7.1e-55
TRINITY_DN14057_c1_g1	sp|Q5PQ71|ISOC2_XENLA	isoc2	Isochorismatase domain-containing protein 2 OS=Xenopus laevis GN=isoc2 PE=2 SV=1	60	4.1e-61
TRINITY_DN14057_c2_g1	sp|O75695|XRP2_HUMAN	RP2	Protein XRP2 OS=Homo sapiens GN=RP2 PE=1 SV=4	39.2	1.3e-58
TRINITY_DN14057_c2_g5	sp|Q16236|NF2L2_HUMAN	NFE2L2	Nuclear factor erythroid 2-related factor 2 OS=Homo sapiens GN=NFE2L2 PE=1 SV=3	34.4	1.8e-08
TRINITY_DN14058_c0_g2	sp|Q2KJI2|STT3A_BOVIN	STT3A	Dolichyl-diphosphooligosaccharide--protein glycosyltransferase subunit STT3A OS=Bos taurus GN=STT3A PE=2 SV=1	83.9	1.3e-189
TRINITY_DN14060_c1_g1	sp|Q9UKN7|MYO15_HUMAN	MYO15A	Unconventional myosin-XV OS=Homo sapiens GN=MYO15A PE=1 SV=2	44.8	2.2e-57
TRINITY_DN14060_c2_g2	sp|Q93AM1|FLDA_CLOSG	fldA	E-cinnamoyl-CoA:R-phenyllactate CoA transferase OS=Clostridium sporogenes GN=fldA PE=1 SV=1	31.9	5.1e-08
TRINITY_DN14060_c2_g3	sp|Q8IV48|ERI1_HUMAN	ERI1	3'-5' exoribonuclease 1 OS=Homo sapiens GN=ERI1 PE=1 SV=3	41.4	4.3e-60
TRINITY_DN14060_c2_g4	sp|O09174|AMACR_MOUSE	Amacr	Alpha-methylacyl-CoA racemase OS=Mus musculus GN=Amacr PE=1 SV=4	60.8	1.8e-56
TRINITY_DN14060_c2_g8	sp|Q5HZL1|ERI2_XENLA	eri2	ERI1 exoribonuclease 2 OS=Xenopus laevis GN=eri2 PE=2 SV=1	38.9	8.9e-15
TRINITY_DN14062_c0_g14	sp|Q99315|YG31B_YEAST	TY3B-G	Transposon Ty3-G Gag-Pol polyprotein OS=Saccharomyces cerevisiae (strain ATCC 204508 / S288c) GN=TY3B-G PE=1 SV=3	46.5	6.1e-47
TRINITY_DN14062_c0_g2	sp|P04323|POL3_DROME	pol	Retrovirus-related Pol polyprotein from transposon 17.6 OS=Drosophila melanogaster GN=pol PE=3 SV=1	42.1	4.4e-68
TRINITY_DN14062_c0_g8	sp|P10394|POL4_DROME	POL	Retrovirus-related Pol polyprotein from transposon 412 OS=Drosophila melanogaster GN=POL PE=3 SV=1	43	7.7e-11
TRINITY_DN14062_c0_g9	sp|P10394|POL4_DROME	POL	Retrovirus-related Pol polyprotein from transposon 412 OS=Drosophila melanogaster GN=POL PE=3 SV=1	47.2	2.5e-16
TRINITY_DN14063_c2_g11	sp|P18856|CAF1_EPHMU	COLF1	Collagen EMF1-alpha (Fragment) OS=Ephydatia muelleri GN=COLF1 PE=3 SV=2	100	6.2e-138
TRINITY_DN14063_c2_g4	sp|Q3KR73|KANL3_RAT	Kansl3	KAT8 regulatory NSL complex subunit 3 OS=Rattus norvegicus GN=Kansl3 PE=2 SV=1	33.4	7.3e-65
TRINITY_DN14063_c2_g6	sp|Q90744|NAGAB_CHICK	NAGA	Alpha-N-acetylgalactosaminidase OS=Gallus gallus GN=NAGA PE=1 SV=1	53	7.1e-118
TRINITY_DN14064_c0_g1	sp|Q9ESN9|JIP3_MOUSE	Mapk8ip3	C-Jun-amino-terminal kinase-interacting protein 3 OS=Mus musculus GN=Mapk8ip3 PE=1 SV=1	25	4.9e-07
TRINITY_DN14065_c1_g1	sp|Q6ZMV9|KIF6_HUMAN	KIF6	Kinesin-like protein KIF6 OS=Homo sapiens GN=KIF6 PE=1 SV=3	71.6	2.2e-128
TRINITY_DN14065_c2_g8	sp|Q9D3B1|HACD2_MOUSE	Hacd2	Very-long-chain (3R)-3-hydroxyacyl-CoA dehydratase 2 OS=Mus musculus GN=Hacd2 PE=1 SV=1	50.5	7.4e-50
TRINITY_DN14066_c1_g7	sp|Q6B9X6|VWKA_DICDI	vwkA	Alpha-protein kinase vwkA OS=Dictyostelium discoideum GN=vwkA PE=1 SV=1	33.7	3.6e-63
TRINITY_DN14071_c0_g3	sp|Q9PT63|CKAP5_XENLA	ckap5-a	Cytoskeleton-associated protein 5-A OS=Xenopus laevis GN=ckap5-a PE=1 SV=1	46.4	8e-148
TRINITY_DN14071_c0_g5	sp|Q14008|CKAP5_HUMAN	CKAP5	Cytoskeleton-associated protein 5 OS=Homo sapiens GN=CKAP5 PE=1 SV=3	49.7	3.7e-30
TRINITY_DN14073_c4_g1	sp|Q3MHQ0|USH1C_BOVIN	USH1C	Harmonin OS=Bos taurus GN=USH1C PE=2 SV=1	42.2	4.6e-22
TRINITY_DN14075_c0_g1	sp|Q5R7W2|MPCP_PONAB	SLC25A3	Phosphate carrier protein, mitochondrial OS=Pongo abelii GN=SLC25A3 PE=2 SV=1	71.1	2.6e-142
TRINITY_DN14076_c3_g1	sp|Q5XM24|APRA_DICDI	aprA	Autocrine proliferation repressor protein A OS=Dictyostelium discoideum GN=aprA PE=1 SV=1	36.1	2e-42
TRINITY_DN14076_c3_g4	sp|P22126|RAS1_NEUCR	ras-1	Protein ras-1 OS=Neurospora crassa (strain ATCC 24698 / 74-OR23-1A / CBS 708.71 / DSM 1257 / FGSC 987) GN=ras-1 PE=2 SV=1	60.5	3.9e-06
TRINITY_DN14076_c3_g5	sp|Q5F470|RAB8A_CHICK	RAB8A	Ras-related protein Rab-8A OS=Gallus gallus GN=RAB8A PE=2 SV=1	50	3.2e-35
TRINITY_DN14077_c0_g1	sp|O75503|CLN5_HUMAN	CLN5	Ceroid-lipofuscinosis neuronal protein 5 OS=Homo sapiens GN=CLN5 PE=1 SV=2	53.2	1.7e-79
TRINITY_DN14077_c0_g2	sp|Q680A5|KPRS4_ARATH	PRS4	Ribose-phosphate pyrophosphokinase 4 OS=Arabidopsis thaliana GN=PRS4 PE=1 SV=2	51.7	5.9e-82
TRINITY_DN14078_c1_g2	sp|O88491|NSD1_MOUSE	Nsd1	Histone-lysine N-methyltransferase, H3 lysine-36 and H4 lysine-20 specific OS=Mus musculus GN=Nsd1 PE=1 SV=1	39.5	1.7e-134
TRINITY_DN14082_c0_g1	sp|Q86XH1|IQCA1_HUMAN	IQCA1	IQ and AAA domain-containing protein 1 OS=Homo sapiens GN=IQCA1 PE=2 SV=1	61.5	5.4e-112
TRINITY_DN14082_c0_g2	sp|Q08699|RS14_PODCA	RPS14	40S ribosomal protein S14 OS=Podocoryna carnea GN=RPS14 PE=2 SV=1	88	8.5e-68
TRINITY_DN14082_c0_g3	sp|Q86XH1|IQCA1_HUMAN	IQCA1	IQ and AAA domain-containing protein 1 OS=Homo sapiens GN=IQCA1 PE=2 SV=1	50.8	1.7e-83
TRINITY_DN14084_c0_g1	sp|Q66KC4|HSDL2_XENTR	hsdl2	Hydroxysteroid dehydrogenase-like protein 2 OS=Xenopus tropicalis GN=hsdl2 PE=2 SV=1	61.4	1.1e-134
TRINITY_DN14085_c0_g3	sp|Q28988|CYTA1_PIG	-	Cystatin-A1 OS=Sus scrofa PE=1 SV=1	48	2.7e-20
TRINITY_DN14088_c1_g1	sp|P57721|PCBP3_HUMAN	PCBP3	Poly(rC)-binding protein 3 OS=Homo sapiens GN=PCBP3 PE=2 SV=2	48.5	6.9e-06
TRINITY_DN14092_c2_g1	sp|Q921V5|MGAT2_MOUSE	Mgat2	Alpha-1,6-mannosyl-glycoprotein 2-beta-N-acetylglucosaminyltransferase OS=Mus musculus GN=Mgat2 PE=1 SV=1	43.7	1e-94
TRINITY_DN14092_c2_g2	sp|Q8K0V4|CNOT3_MOUSE	Cnot3	CCR4-NOT transcription complex subunit 3 OS=Mus musculus GN=Cnot3 PE=1 SV=1	76.3	1.6e-65
TRINITY_DN14094_c1_g11	sp|O13853|ITS3_SCHPO	its3	Phosphatidylinositol 4-phosphate 5-kinase its3 OS=Schizosaccharomyces pombe (strain 972 / ATCC 24843) GN=its3 PE=1 SV=3	33.4	1.3e-39
TRINITY_DN14097_c0_g3	sp|Q6DIH3|MCM2_XENTR	mcm2	DNA replication licensing factor mcm2 OS=Xenopus tropicalis GN=mcm2 PE=2 SV=1	72.6	1.3e-82
TRINITY_DN14098_c0_g1	sp|Q8BSF4|PISD_MOUSE	Pisd	Phosphatidylserine decarboxylase proenzyme, mitochondrial OS=Mus musculus GN=Pisd PE=2 SV=1	42.7	2.5e-49
TRINITY_DN14098_c0_g2	sp|P98174|FGD1_HUMAN	FGD1	FYVE, RhoGEF and PH domain-containing protein 1 OS=Homo sapiens GN=FGD1 PE=1 SV=2	28.5	6.9e-30
TRINITY_DN14099_c1_g2	sp|Q9Y5R4|HEMK1_HUMAN	HEMK1	HemK methyltransferase family member 1 OS=Homo sapiens GN=HEMK1 PE=1 SV=1	40.9	5e-34
TRINITY_DN14099_c2_g1	sp|Q00168|KCC2A_DROME	CaMKII	Calcium/calmodulin-dependent protein kinase type II alpha chain OS=Drosophila melanogaster GN=CaMKII PE=1 SV=1	49	3.7e-13
TRINITY_DN14102_c5_g1	sp|P26990|ARF6_CHICK	ARF6	ADP-ribosylation factor 6 OS=Gallus gallus GN=ARF6 PE=2 SV=3	93	2.6e-33
TRINITY_DN14102_c5_g3	sp|Q6CG48|LIS1_YARLI	PAC1	Nuclear distribution protein PAC1 OS=Yarrowia lipolytica (strain CLIB 122 / E 150) GN=PAC1 PE=3 SV=1	24	1.7e-06
TRINITY_DN14102_c5_g5	sp|O60930|RNH1_HUMAN	RNASEH1	Ribonuclease H1 OS=Homo sapiens GN=RNASEH1 PE=1 SV=2	45.3	1.8e-55
TRINITY_DN14104_c5_g2	sp|Q3UHD6|SNX27_MOUSE	Snx27	Sorting nexin-27 OS=Mus musculus GN=Snx27 PE=1 SV=2	40.2	6.4e-92
TRINITY_DN14105_c4_g4	sp|Q0VFM0|ZFPL1_XENTR	zfpl1	Zinc finger protein-like 1 OS=Xenopus tropicalis GN=zfpl1 PE=2 SV=1	33.9	5.6e-46
TRINITY_DN14106_c0_g1	sp|Q15545|TAF7_HUMAN	TAF7	Transcription initiation factor TFIID subunit 7 OS=Homo sapiens GN=TAF7 PE=1 SV=1	45.4	4.6e-38
TRINITY_DN14108_c0_g3	sp|F1N9Y5|KSYK_CHICK	SYK	Tyrosine-protein kinase SYK OS=Gallus gallus GN=SYK PE=1 SV=2	34.4	7.2e-61
TRINITY_DN14109_c2_g3	sp|Q60EX6|BSL1_ORYSJ	BSL1	Serine/threonine-protein phosphatase BSL1 homolog OS=Oryza sativa subsp. japonica GN=BSL1 PE=2 SV=1	38.2	2.4e-47
TRINITY_DN14110_c0_g1	sp|Q7Z589|EMSY_HUMAN	EMSY	BRCA2-interacting transcriptional repressor EMSY OS=Homo sapiens GN=EMSY PE=1 SV=2	56	1.2e-20
TRINITY_DN14114_c3_g3	sp|Q8VE47|UBA5_MOUSE	Uba5	Ubiquitin-like modifier-activating enzyme 5 OS=Mus musculus GN=Uba5 PE=1 SV=2	61.5	1.4e-91
TRINITY_DN14116_c0_g1	sp|O76031|CLPX_HUMAN	CLPX	ATP-dependent Clp protease ATP-binding subunit clpX-like, mitochondrial OS=Homo sapiens GN=CLPX PE=1 SV=2	80	4.8e-26
TRINITY_DN14116_c0_g3	sp|Q8IZ73|RUSD2_HUMAN	RPUSD2	RNA pseudouridylate synthase domain-containing protein 2 OS=Homo sapiens GN=RPUSD2 PE=1 SV=2	39.3	2.8e-45
TRINITY_DN14119_c0_g1	sp|Q9Y6J9|TAF6L_HUMAN	TAF6L	TAF6-like RNA polymerase II p300/CBP-associated factor-associated factor 65 kDa subunit 6L OS=Homo sapiens GN=TAF6L PE=1 SV=1	29.3	2.5e-23
TRINITY_DN14119_c0_g2	sp|Q9WU19|HAOX1_MOUSE	Hao1	Hydroxyacid oxidase 1 OS=Mus musculus GN=Hao1 PE=1 SV=1	55.8	1.8e-114
TRINITY_DN14120_c3_g2	sp|Q5ZL26|KPRB_CHICK	PRPSAP2	Phosphoribosyl pyrophosphate synthase-associated protein 2 OS=Gallus gallus GN=PRPSAP2 PE=2 SV=1	54.2	7.2e-86
TRINITY_DN14121_c3_g10	sp|Q07994|NCPR_MUSDO	-	NADPH--cytochrome P450 reductase OS=Musca domestica PE=2 SV=1	52.2	2.7e-48
TRINITY_DN14121_c3_g2	sp|Q2KIY5|PLBL2_BOVIN	PLBD2	Putative phospholipase B-like 2 OS=Bos taurus GN=PLBD2 PE=2 SV=1	51.3	8.2e-140
TRINITY_DN14127_c2_g1	sp|Q64270|EI2BA_RAT	Eif2b1	Translation initiation factor eIF-2B subunit alpha OS=Rattus norvegicus GN=Eif2b1 PE=2 SV=1	55.6	1.2e-78
TRINITY_DN14127_c3_g1	sp|Q9FN03|UVR8_ARATH	UVR8	Ultraviolet-B receptor UVR8 OS=Arabidopsis thaliana GN=UVR8 PE=1 SV=1	31.7	1.9e-43
TRINITY_DN14127_c3_g6	sp|Q8IZF6|AGRG4_HUMAN	ADGRG4	Adhesion G-protein coupled receptor G4 OS=Homo sapiens GN=ADGRG4 PE=2 SV=2	27.4	2.7e-39
TRINITY_DN14128_c3_g1	sp|Q9Y2T3|GUAD_HUMAN	GDA	Guanine deaminase OS=Homo sapiens GN=GDA PE=1 SV=1	48.7	3e-108
TRINITY_DN14128_c3_g6	sp|Q5XJK1|SCOCB_DANRE	scocb	Short coiled-coil protein B OS=Danio rerio GN=scocb PE=3 SV=1	62.5	5.8e-12
TRINITY_DN14128_c3_g9	sp|Q15008|PSMD6_HUMAN	PSMD6	26S proteasome non-ATPase regulatory subunit 6 OS=Homo sapiens GN=PSMD6 PE=1 SV=1	61.4	6.8e-133
TRINITY_DN1412_c0_g1	sp|Q5I0H9|PDIA5_RAT	Pdia5	Protein disulfide-isomerase A5 OS=Rattus norvegicus GN=Pdia5 PE=2 SV=1	47.5	1e-122
TRINITY_DN14131_c0_g1	sp|Q8N122|RPTOR_HUMAN	RPTOR	Regulatory-associated protein of mTOR OS=Homo sapiens GN=RPTOR PE=1 SV=1	69	3e-146
TRINITY_DN14131_c0_g4	sp|Q8K4Q0|RPTOR_MOUSE	Rptor	Regulatory-associated protein of mTOR OS=Mus musculus GN=Rptor PE=1 SV=1	34.9	3.5e-133
TRINITY_DN14137_c0_g1	sp|P63085|MK01_MOUSE	Mapk1	Mitogen-activated protein kinase 1 OS=Mus musculus GN=Mapk1 PE=1 SV=3	78.1	3.7e-28
TRINITY_DN14137_c2_g4	sp|P40417|ERKA_DROME	rl	Mitogen-activated protein kinase ERK-A OS=Drosophila melanogaster GN=rl PE=1 SV=3	72.5	1.4e-64
TRINITY_DN14137_c2_g6	sp|P39745|MPK1_CAEEL	mpk-1	Mitogen-activated protein kinase mpk-1 OS=Caenorhabditis elegans GN=mpk-1 PE=1 SV=2	76.7	3.6e-08
TRINITY_DN14140_c0_g2	sp|Q6BT31|ATG8_DEBHA	ATG8	Autophagy-related protein 8 OS=Debaryomyces hansenii (strain ATCC 36239 / CBS 767 / JCM 1990 / NBRC 0083 / IGC 2968) GN=ATG8 PE=3 SV=2	43.3	4.1e-14
TRINITY_DN14140_c0_g3	sp|Q9CY66|GAR1_MOUSE	Gar1	H/ACA ribonucleoprotein complex subunit 1 OS=Mus musculus GN=Gar1 PE=1 SV=1	69.2	1.7e-35
TRINITY_DN14141_c0_g1	sp|Q4V7T8|ROP1L_XENLA	ropn1l	Ropporin-1-like protein OS=Xenopus laevis GN=ropn1l PE=2 SV=1	37.9	6.6e-37
TRINITY_DN14141_c0_g2	sp|Q8NCG7|DGLB_HUMAN	DAGLB	Sn1-specific diacylglycerol lipase beta OS=Homo sapiens GN=DAGLB PE=1 SV=2	31.2	2.4e-88
TRINITY_DN14141_c1_g1	sp|Q91YI1|ATG13_MOUSE	Atg13	Autophagy-related protein 13 OS=Mus musculus GN=Atg13 PE=1 SV=2	40.5	8.2e-33
TRINITY_DN14142_c0_g1	sp|Q8K0C9|GMDS_MOUSE	Gmds	GDP-mannose 4,6 dehydratase OS=Mus musculus GN=Gmds PE=1 SV=1	69	6e-110
TRINITY_DN14142_c0_g3	sp|P13060|EF2_DROME	EF2	Elongation factor 2 OS=Drosophila melanogaster GN=EF2 PE=1 SV=4	77.6	6.1e-279
TRINITY_DN14142_c0_g6	sp|Q90705|EF2_CHICK	EEF2	Elongation factor 2 OS=Gallus gallus GN=EEF2 PE=1 SV=3	79.4	3.7e-118
TRINITY_DN14142_c0_g7	sp|Q9P2E3|ZNFX1_HUMAN	ZNFX1	NFX1-type zinc finger-containing protein 1 OS=Homo sapiens GN=ZNFX1 PE=2 SV=2	35.8	3.9e-241
TRINITY_DN14143_c1_g1	sp|Q4QQS1|T184A_RAT	Tmem184a	Transmembrane protein 184A OS=Rattus norvegicus GN=Tmem184a PE=1 SV=1	54.5	2.5e-91
TRINITY_DN14143_c1_g4	sp|Q12894|IFRD2_HUMAN	IFRD2	Interferon-related developmental regulator 2 OS=Homo sapiens GN=IFRD2 PE=1 SV=3	33.3	3.1e-43
TRINITY_DN14143_c1_g7	sp|Q9DA08|SGF29_MOUSE	Sgf29	SAGA-associated factor 29 OS=Mus musculus GN=Sgf29 PE=2 SV=1	47.2	4.9e-74
TRINITY_DN14148_c0_g1	sp|Q9H871|RMD5A_HUMAN	RMND5A	Protein RMD5 homolog A OS=Homo sapiens GN=RMND5A PE=1 SV=1	43.9	2.6e-88
TRINITY_DN14149_c0_g1	sp|Q99829|CPNE1_HUMAN	CPNE1	Copine-1 OS=Homo sapiens GN=CPNE1 PE=1 SV=1	50	1.6e-18
TRINITY_DN14149_c0_g5	sp|Q5BJS7|CPNE9_RAT	Cpne9	Copine-9 OS=Rattus norvegicus GN=Cpne9 PE=2 SV=1	46	3.2e-17
TRINITY_DN14151_c2_g3	sp|Q924A2|CIC_MOUSE	Cic	Protein capicua homolog OS=Mus musculus GN=Cic PE=1 SV=2	66.7	6.7e-12
TRINITY_DN14151_c4_g1	sp|Q7TSG2|CTDP1_MOUSE	Ctdp1	RNA polymerase II subunit A C-terminal domain phosphatase OS=Mus musculus GN=Ctdp1 PE=1 SV=1	50.2	1.3e-57
TRINITY_DN14152_c0_g3	sp|Q8R420|ABCA3_MOUSE	Abca3	ATP-binding cassette sub-family A member 3 OS=Mus musculus GN=Abca3 PE=1 SV=3	31.6	5.4e-34
TRINITY_DN14154_c0_g1	sp|Q6RKB1|CAR_NOCIO	car	Carboxylic acid reductase OS=Nocardia iowensis GN=car PE=1 SV=1	30.2	4.9e-68
TRINITY_DN14155_c0_g2	sp|C3YFB4|DRE2_BRAFL	BRAFLDRAFT_58504	Anamorsin homolog OS=Branchiostoma floridae GN=BRAFLDRAFT_58504 PE=3 SV=1	45.8	2.2e-68
TRINITY_DN14156_c0_g1	sp|Q6YD92|SILIC_PETFI	-	Silicatein OS=Petrosia ficiformis PE=1 SV=1	49.5	6.2e-87
TRINITY_DN14156_c0_g2	sp|Q6YD92|SILIC_PETFI	-	Silicatein OS=Petrosia ficiformis PE=1 SV=1	55.3	1.5e-104
TRINITY_DN14158_c2_g3	sp|P15170|ERF3A_HUMAN	GSPT1	Eukaryotic peptide chain release factor GTP-binding subunit ERF3A OS=Homo sapiens GN=GSPT1 PE=1 SV=1	66.7	4.8e-42
TRINITY_DN14158_c2_g4	sp|P07688|CATB_BOVIN	CTSB	Cathepsin B OS=Bos taurus GN=CTSB PE=1 SV=5	52	1e-103
TRINITY_DN14158_c2_g6	sp|Q8R050|ERF3A_MOUSE	Gspt1	Eukaryotic peptide chain release factor GTP-binding subunit ERF3A OS=Mus musculus GN=Gspt1 PE=1 SV=2	73.8	8.1e-124
TRINITY_DN14158_c3_g1	sp|Q86Y13|DZIP3_HUMAN	DZIP3	E3 ubiquitin-protein ligase DZIP3 OS=Homo sapiens GN=DZIP3 PE=1 SV=2	30	2.5e-15
TRINITY_DN14159_c0_g2	sp|Q9H8W5|TRI45_HUMAN	TRIM45	Tripartite motif-containing protein 45 OS=Homo sapiens GN=TRIM45 PE=1 SV=2	22.9	1.1e-22
TRINITY_DN14161_c3_g1	sp|H2N4I1|QSOX1_PONAB	QSOX1	Sulfhydryl oxidase 1 OS=Pongo abelii GN=QSOX1 PE=3 SV=2	33	6.8e-37
TRINITY_DN14161_c4_g1	sp|P08133|ANXA6_HUMAN	ANXA6	Annexin A6 OS=Homo sapiens GN=ANXA6 PE=1 SV=3	52.8	9.4e-30
TRINITY_DN14162_c2_g1	sp|P61593|MCPH1_PANTR	MCPH1	Microcephalin OS=Pan troglodytes GN=MCPH1 PE=3 SV=1	38.8	5.4e-15
TRINITY_DN14162_c3_g4	sp|O00311|CDC7_HUMAN	CDC7	Cell division cycle 7-related protein kinase OS=Homo sapiens GN=CDC7 PE=1 SV=1	36	6.1e-82
TRINITY_DN14163_c3_g5	sp|Q63615|VP33A_RAT	Vps33a	Vacuolar protein sorting-associated protein 33A OS=Rattus norvegicus GN=Vps33a PE=1 SV=1	39.5	8.6e-120
TRINITY_DN14164_c3_g1	sp|Q29S00|OSCP1_BOVIN	OSCP1	Protein OSCP1 OS=Bos taurus GN=OSCP1 PE=2 SV=1	46.2	9.4e-69
TRINITY_DN14164_c3_g2	sp|Q9W391|KPBA_DROME	CG7766	Probable phosphorylase b kinase regulatory subunit alpha OS=Drosophila melanogaster GN=CG7766 PE=1 SV=2	54.6	2.6e-86
TRINITY_DN14165_c0_g1	sp|Q6NVM2|KTNB1_XENTR	katnb1	Katanin p80 WD40 repeat-containing subunit B1 OS=Xenopus tropicalis GN=katnb1 PE=2 SV=1	39.9	4.4e-30
TRINITY_DN14168_c0_g2	sp|F6HDT7|MTND2_VITVI	VIT_05s0020g04080	1,2-dihydroxy-3-keto-5-methylthiopentene dioxygenase 2 OS=Vitis vinifera GN=VIT_05s0020g04080 PE=3 SV=1	64.2	2.2e-65
TRINITY_DN14170_c0_g2	sp|P56518|HDAC1_STRPU	HDAC1	Histone deacetylase 1 OS=Strongylocentrotus purpuratus GN=HDAC1 PE=2 SV=1	85.1	3.6e-206
TRINITY_DN14171_c1_g3	sp|Q8JHF2|LFNG_DANRE	lfng	Beta-1,3-N-acetylglucosaminyltransferase lunatic fringe OS=Danio rerio GN=lfng PE=2 SV=2	29.2	1.6e-24
TRINITY_DN14171_c1_g5	sp|Q9YHB3|RFNG_NOTVI	RFNG	Beta-1,3-N-acetylglucosaminyltransferase radical fringe OS=Notophthalmus viridescens GN=RFNG PE=2 SV=1	26.2	5.5e-22
TRINITY_DN14172_c3_g1	sp|Q2KII4|ELOC_BOVIN	TCEB1	Transcription elongation factor B polypeptide 1 OS=Bos taurus GN=TCEB1 PE=3 SV=1	63.4	6.2e-42
TRINITY_DN14172_c3_g2	sp|Q54QB1|ERK2_DICDI	erkB	Extracellular signal-regulated kinase 2 OS=Dictyostelium discoideum GN=erkB PE=1 SV=1	55.9	2e-65
TRINITY_DN14173_c0_g1	sp|O43292|GPAA1_HUMAN	GPAA1	Glycosylphosphatidylinositol anchor attachment 1 protein OS=Homo sapiens GN=GPAA1 PE=1 SV=3	30.8	1.3e-59
TRINITY_DN14173_c1_g1	sp|P53582|MAP11_HUMAN	METAP1	Methionine aminopeptidase 1 OS=Homo sapiens GN=METAP1 PE=1 SV=2	43.6	1.7e-89
TRINITY_DN14173_c3_g1	sp|Q5ZK28|DPOD3_CHICK	POLD3	DNA polymerase delta subunit 3 OS=Gallus gallus GN=POLD3 PE=1 SV=2	53.3	5.5e-31
TRINITY_DN14174_c0_g4	sp|B5XBI1|IF43A_SALSA	ift43a	Intraflagellar transport protein 43 homolog A OS=Salmo salar GN=ift43a PE=2 SV=1	54.5	1.1e-25
TRINITY_DN14175_c0_g1	sp|O70537|CP3AV_MESAU	CYP3A31	Cytochrome P450 3A31 OS=Mesocricetus auratus GN=CYP3A31 PE=2 SV=1	35.7	5e-70
TRINITY_DN14181_c2_g2	sp|Q92556|ELMO1_HUMAN	ELMO1	Engulfment and cell motility protein 1 OS=Homo sapiens GN=ELMO1 PE=1 SV=2	37.5	4.6e-127
TRINITY_DN14182_c1_g1	sp|Q9QX11|CYH1_MOUSE	Cyth1	Cytohesin-1 OS=Mus musculus GN=Cyth1 PE=1 SV=2	49.4	8e-95
TRINITY_DN14183_c0_g2	sp|Q6L8S8|B4GN3_MOUSE	B4galnt3	Beta-1,4-N-acetylgalactosaminyltransferase 3 OS=Mus musculus GN=B4galnt3 PE=2 SV=1	43.4	4.1e-24
TRINITY_DN14184_c0_g2	sp|Q5F3X4|U5S1_CHICK	EFTUD2	116 kDa U5 small nuclear ribonucleoprotein component OS=Gallus gallus GN=EFTUD2 PE=2 SV=1	79.3	0
TRINITY_DN14188_c0_g4	sp|Q9JIR0|RIMB1_RAT	Tspoap1	Peripheral-type benzodiazepine receptor-associated protein 1 OS=Rattus norvegicus GN=Tspoap1 PE=1 SV=2	32.1	2.9e-20
TRINITY_DN14191_c0_g1	sp|P51817|PRKX_HUMAN	PRKX	cAMP-dependent protein kinase catalytic subunit PRKX OS=Homo sapiens GN=PRKX PE=1 SV=1	49.9	1.7e-104
TRINITY_DN14191_c0_g2	sp|Q32TG3|EFHC2_CHICK	EFHC2	EF-hand domain-containing family member C2 OS=Gallus gallus GN=EFHC2 PE=2 SV=1	50.7	2.8e-182
TRINITY_DN14193_c0_g1	sp|Q90YS3|RS2_ICTPU	rps2	40S ribosomal protein S2 OS=Ictalurus punctatus GN=rps2 PE=2 SV=1	77.9	2.2e-104
TRINITY_DN14194_c0_g1	sp|P14866|HNRPL_HUMAN	HNRNPL	Heterogeneous nuclear ribonucleoprotein L OS=Homo sapiens GN=HNRNPL PE=1 SV=2	42.7	3.4e-64
TRINITY_DN14195_c2_g5	sp|Q91661|GLI4_XENLA	gli4	Zinc finger protein GLI4 OS=Xenopus laevis GN=gli4 PE=2 SV=1	34.9	5.1e-37
TRINITY_DN14196_c0_g3	sp|P18052|PTPRA_MOUSE	Ptpra	Receptor-type tyrosine-protein phosphatase alpha OS=Mus musculus GN=Ptpra PE=1 SV=3	32.2	1.7e-72
TRINITY_DN14200_c0_g2	sp|P40122|CAP_HYDVD	CAP	Adenylyl cyclase-associated protein OS=Hydra viridissima GN=CAP PE=2 SV=1	53.9	2.5e-17
TRINITY_DN14200_c0_g3	sp|Q9QXL7|NDK7_RAT	Nme7	Nucleoside diphosphate kinase 7 OS=Rattus norvegicus GN=Nme7 PE=1 SV=1	49.2	2.4e-106
TRINITY_DN14200_c0_g5	sp|Q9CYT6|CAP2_MOUSE	Cap2	Adenylyl cyclase-associated protein 2 OS=Mus musculus GN=Cap2 PE=1 SV=1	46.9	5.6e-26
TRINITY_DN14201_c1_g1	sp|Q8WQ99|KC1G_CAEEL	csnk-1	Casein kinase I gamma OS=Caenorhabditis elegans GN=csnk-1 PE=3 SV=1	89.2	1.4e-12
TRINITY_DN14201_c1_g3	sp|Q5PRD4|KC1G1_DANRE	csnk1g1	Casein kinase I isoform gamma-1 OS=Danio rerio GN=csnk1g1 PE=2 SV=1	79.5	3.1e-98
TRINITY_DN14202_c2_g1	sp|Q8CG72|ARHL2_MOUSE	Adprhl2	Poly(ADP-ribose) glycohydrolase ARH3 OS=Mus musculus GN=Adprhl2 PE=1 SV=1	36.7	1.3e-54
TRINITY_DN14203_c0_g1	sp|O35343|IMA3_MOUSE	Kpna4	Importin subunit alpha-3 OS=Mus musculus GN=Kpna4 PE=1 SV=1	56.5	1.7e-35
TRINITY_DN14204_c2_g1	sp|P49445|PTN7_RAT	Ptpn7	Tyrosine-protein phosphatase non-receptor type 7 OS=Rattus norvegicus GN=Ptpn7 PE=1 SV=1	42.7	2.5e-21
TRINITY_DN14204_c2_g2	sp|Q5M888|CG025_RAT	-	UPF0415 protein C7orf25 homolog OS=Rattus norvegicus PE=2 SV=1	48.5	1.4e-38
TRINITY_DN14205_c5_g1	sp|Q9BZG1|RAB34_HUMAN	RAB34	Ras-related protein Rab-34 OS=Homo sapiens GN=RAB34 PE=1 SV=1	40	2e-17
TRINITY_DN14206_c1_g1	sp|O73747|FRG1_TAKRU	frg1	Protein FRG1 OS=Takifugu rubripes GN=frg1 PE=2 SV=1	49.4	1.2e-42
TRINITY_DN14206_c3_g1	sp|Q63100|DC1I1_RAT	Dync1i1	Cytoplasmic dynein 1 intermediate chain 1 OS=Rattus norvegicus GN=Dync1i1 PE=1 SV=1	51.1	3.4e-140
TRINITY_DN14206_c3_g4	sp|Q5RFH0|ATP5L_PONAB	ATP5L	ATP synthase subunit g, mitochondrial OS=Pongo abelii GN=ATP5L PE=3 SV=1	43.7	2.6e-17
TRINITY_DN14206_c3_g6	sp|Q58DC5|GTPB1_BOVIN	GTPBP1	GTP-binding protein 1 OS=Bos taurus GN=GTPBP1 PE=2 SV=2	67.6	4.1e-204
TRINITY_DN14210_c0_g2	sp|P59046|NAL12_HUMAN	NLRP12	NACHT, LRR and PYD domains-containing protein 12 OS=Homo sapiens GN=NLRP12 PE=1 SV=2	22.5	4.5e-13
TRINITY_DN14211_c0_g1	sp|Q9Y3M8|STA13_HUMAN	STARD13	StAR-related lipid transfer protein 13 OS=Homo sapiens GN=STARD13 PE=1 SV=2	35.7	1.1e-42
TRINITY_DN14211_c1_g1	sp|Q6IP06|STK3_XENLA	stk3	Serine/threonine-protein kinase 3 OS=Xenopus laevis GN=stk3 PE=2 SV=1	78.6	3.2e-52
TRINITY_DN14211_c2_g1	sp|Q58DR2|DJB12_BOVIN	DNAJB12	DnaJ homolog subfamily B member 12 OS=Bos taurus GN=DNAJB12 PE=2 SV=1	45	2.7e-20
TRINITY_DN14211_c2_g2	sp|O95340|PAPS2_HUMAN	PAPSS2	Bifunctional 3'-phosphoadenosine 5'-phosphosulfate synthase 2 OS=Homo sapiens GN=PAPSS2 PE=1 SV=2	71	7e-117
TRINITY_DN14212_c0_g1	sp|Q9Y5Q9|TF3C3_HUMAN	GTF3C3	General transcription factor 3C polypeptide 3 OS=Homo sapiens GN=GTF3C3 PE=1 SV=1	30.3	4.7e-45
TRINITY_DN14215_c0_g1	sp|Q8IW92|GLBL2_HUMAN	GLB1L2	Beta-galactosidase-1-like protein 2 OS=Homo sapiens GN=GLB1L2 PE=2 SV=1	42.1	3.1e-132
TRINITY_DN14216_c0_g1	sp|Q8I1C0|SH3G3_DROPS	EndoA	Endophilin-A OS=Drosophila pseudoobscura pseudoobscura GN=EndoA PE=3 SV=1	42.4	1.3e-06
TRINITY_DN14216_c0_g2	sp|Q9NYL2|MLTK_HUMAN	ZAK	Mitogen-activated protein kinase kinase kinase MLT OS=Homo sapiens GN=ZAK PE=1 SV=3	32.6	1.2e-18
TRINITY_DN14219_c1_g5	sp|Q3V050|S47A2_MOUSE	Slc47a2	Multidrug and toxin extrusion protein 2 OS=Mus musculus GN=Slc47a2 PE=1 SV=1	41.9	3e-23
TRINITY_DN14222_c0_g1	sp|Q7Z5S9|TM144_HUMAN	TMEM144	Transmembrane protein 144 OS=Homo sapiens GN=TMEM144 PE=2 SV=1	40.7	7.6e-72
TRINITY_DN14223_c1_g1	sp|Q503L9|NXN_DANRE	nxn	Nucleoredoxin OS=Danio rerio GN=nxn PE=2 SV=1	55.6	4.3e-20
TRINITY_DN14224_c0_g2	sp|P55809|SCOT1_HUMAN	OXCT1	Succinyl-CoA:3-ketoacid coenzyme A transferase 1, mitochondrial OS=Homo sapiens GN=OXCT1 PE=1 SV=1	63.6	7.4e-98
TRINITY_DN14224_c0_g3	sp|P55809|SCOT1_HUMAN	OXCT1	Succinyl-CoA:3-ketoacid coenzyme A transferase 1, mitochondrial OS=Homo sapiens GN=OXCT1 PE=1 SV=1	64.1	2.5e-186
TRINITY_DN14224_c0_g5	sp|P55809|SCOT1_HUMAN	OXCT1	Succinyl-CoA:3-ketoacid coenzyme A transferase 1, mitochondrial OS=Homo sapiens GN=OXCT1 PE=1 SV=1	44	5e-39
TRINITY_DN14226_c0_g1	sp|Q9CQA5|MED4_MOUSE	Med4	Mediator of RNA polymerase II transcription subunit 4 OS=Mus musculus GN=Med4 PE=2 SV=1	28.6	1.6e-17
TRINITY_DN14226_c0_g3	sp|P77735|YAJO_ECOLI	yajO	Uncharacterized oxidoreductase YajO OS=Escherichia coli (strain K12) GN=yajO PE=3 SV=2	35.8	7.7e-50
TRINITY_DN14226_c0_g5	sp|Q12962|TAF10_HUMAN	TAF10	Transcription initiation factor TFIID subunit 10 OS=Homo sapiens GN=TAF10 PE=1 SV=1	63	3.9e-34
TRINITY_DN14228_c0_g1	sp|P13107|CP2B3_RAT	Cyp2b3	Cytochrome P450 2B3 OS=Rattus norvegicus GN=Cyp2b3 PE=2 SV=1	36.9	8.5e-15
TRINITY_DN14228_c0_g4	sp|Q9WVK8|CP46A_MOUSE	Cyp46a1	Cholesterol 24-hydroxylase OS=Mus musculus GN=Cyp46a1 PE=1 SV=1	38.8	1.5e-35
TRINITY_DN14230_c0_g2	sp|Q0IUU4|CML2_ORYSJ	CML2	Putative calmodulin-like protein 2 OS=Oryza sativa subsp. japonica GN=CML2 PE=3 SV=2	42.3	3.7e-17
TRINITY_DN14232_c0_g1	sp|Q3ZCC3|TRAF6_BOVIN	TRAF6	TNF receptor-associated factor 6 OS=Bos taurus GN=TRAF6 PE=2 SV=1	42.6	5.8e-09
TRINITY_DN14234_c1_g4	sp|Q2KIU2|PMVK_BOVIN	PMVK	Phosphomevalonate kinase OS=Bos taurus GN=PMVK PE=2 SV=3	47.5	3.7e-37
TRINITY_DN14235_c1_g3	sp|O94443|YFE9_SCHPO	SPAC637.09	Uncharacterized exonuclease C637.09 OS=Schizosaccharomyces pombe (strain 972 / ATCC 24843) GN=SPAC637.09 PE=3 SV=2	32.3	1.7e-38
TRINITY_DN14235_c1_g6	sp|P36410|RAB14_DICDI	rab14	Ras-related protein Rab-14 OS=Dictyostelium discoideum GN=rab14 PE=1 SV=2	67.9	7.5e-47
TRINITY_DN14236_c0_g1	sp|Q99JR1|SFXN1_MOUSE	Sfxn1	Sideroflexin-1 OS=Mus musculus GN=Sfxn1 PE=1 SV=3	63.1	4.2e-116
TRINITY_DN14237_c0_g2	sp|Q9Y4K0|LOXL2_HUMAN	LOXL2	Lysyl oxidase homolog 2 OS=Homo sapiens GN=LOXL2 PE=1 SV=1	45.1	2.6e-13
TRINITY_DN14238_c0_g2	sp|Q7YR76|MYCD_PIG	MYOCD	Myocardin OS=Sus scrofa GN=MYOCD PE=2 SV=1	27.3	1.5e-09
TRINITY_DN14239_c1_g3	sp|Q9UP95|S12A4_HUMAN	SLC12A4	Solute carrier family 12 member 4 OS=Homo sapiens GN=SLC12A4 PE=1 SV=2	55.4	5.2e-86
TRINITY_DN14239_c1_g6	sp|Q54PQ4|GEFA_DICDI	gefA	Ras guanine nucleotide exchange factor A OS=Dictyostelium discoideum GN=gefA PE=2 SV=1	33.1	4.7e-22
TRINITY_DN14239_c1_g7	sp|Q9UHW9|S12A6_HUMAN	SLC12A6	Solute carrier family 12 member 6 OS=Homo sapiens GN=SLC12A6 PE=1 SV=2	42.7	3.4e-67
TRINITY_DN14243_c1_g1	sp|P42285|SK2L2_HUMAN	SKIV2L2	Superkiller viralicidic activity 2-like 2 OS=Homo sapiens GN=SKIV2L2 PE=1 SV=3	59.3	1.9e-93
TRINITY_DN14243_c1_g12	sp|Q9NWZ5|UCKL1_HUMAN	UCKL1	Uridine-cytidine kinase-like 1 OS=Homo sapiens GN=UCKL1 PE=1 SV=2	61.6	3e-166
TRINITY_DN14243_c1_g2	sp|Q6GVM3|IF1AY_PANTR	EIF1AY	Eukaryotic translation initiation factor 1A, Y-chromosomal OS=Pan troglodytes GN=EIF1AY PE=2 SV=3	74.6	3e-44
TRINITY_DN14243_c1_g6	sp|Q5E9F9|PRS7_BOVIN	PSMC2	26S protease regulatory subunit 7 OS=Bos taurus GN=PSMC2 PE=2 SV=3	82.7	5.9e-210
TRINITY_DN14245_c2_g2	sp|Q5ZLM0|CDC73_CHICK	CDC73	Parafibromin OS=Gallus gallus GN=CDC73 PE=2 SV=1	45.8	6.6e-121
TRINITY_DN14245_c3_g4	sp|P04182|OAT_RAT	Oat	Ornithine aminotransferase, mitochondrial OS=Rattus norvegicus GN=Oat PE=1 SV=1	64	5.3e-166
TRINITY_DN14245_c3_g7	sp|Q8IZC4|RTKN2_HUMAN	RTKN2	Rhotekin-2 OS=Homo sapiens GN=RTKN2 PE=2 SV=1	31.9	3e-45
TRINITY_DN14246_c0_g2	sp|Q5ZKB9|DDX6_CHICK	DDX6	Probable ATP-dependent RNA helicase DDX6 OS=Gallus gallus GN=DDX6 PE=2 SV=1	75.6	3.2e-179
TRINITY_DN14249_c2_g1	sp|P49815|TSC2_HUMAN	TSC2	Tuberin OS=Homo sapiens GN=TSC2 PE=1 SV=2	35	2.3e-102
TRINITY_DN14249_c2_g5	sp|Q7ZW41|RPB7_DANRE	polr2g	DNA-directed RNA polymerase II subunit RPB7 OS=Danio rerio GN=polr2g PE=2 SV=1	73.2	1.9e-10
TRINITY_DN14249_c2_g9	sp|Q7ZW41|RPB7_DANRE	polr2g	DNA-directed RNA polymerase II subunit RPB7 OS=Danio rerio GN=polr2g PE=2 SV=1	84.2	1.3e-64
TRINITY_DN14251_c0_g1	sp|Q14147|DHX34_HUMAN	DHX34	Probable ATP-dependent RNA helicase DHX34 OS=Homo sapiens GN=DHX34 PE=1 SV=2	42.2	7.6e-131
TRINITY_DN14251_c0_g3	sp|Q07816|B2CL1_CHICK	BCL2L1	Bcl-2-like protein 1 OS=Gallus gallus GN=BCL2L1 PE=2 SV=2	30.1	1.2e-10
TRINITY_DN14251_c0_g4	sp|Q3U9G9|LBR_MOUSE	Lbr	Lamin-B receptor OS=Mus musculus GN=Lbr PE=1 SV=2	51	1.4e-125
TRINITY_DN14253_c1_g1	sp|Q9UBU8|MO4L1_HUMAN	MORF4L1	Mortality factor 4-like protein 1 OS=Homo sapiens GN=MORF4L1 PE=1 SV=2	40.5	6.4e-56
TRINITY_DN14254_c2_g1	sp|Q5XJD3|FIP1_DANRE	fip1l1	Pre-mRNA 3'-end-processing factor FIP1 OS=Danio rerio GN=fip1l1 PE=1 SV=1	39.8	1.4e-13
TRINITY_DN14260_c0_g1	sp|P04323|POL3_DROME	pol	Retrovirus-related Pol polyprotein from transposon 17.6 OS=Drosophila melanogaster GN=pol PE=3 SV=1	36.9	7e-13
TRINITY_DN14264_c1_g1	sp|Q8IXY8|PPIL6_HUMAN	PPIL6	Peptidyl-prolyl cis-trans isomerase-like 6 OS=Homo sapiens GN=PPIL6 PE=2 SV=1	43.6	3.4e-29
TRINITY_DN14264_c1_g2	sp|P16473|TSHR_HUMAN	TSHR	Thyrotropin receptor OS=Homo sapiens GN=TSHR PE=1 SV=2	44.8	4.8e-61
TRINITY_DN14265_c0_g2	sp|Q4KLT3|TRM44_XENLA	trmt44	Probable tRNA (uracil-O(2)-)-methyltransferase OS=Xenopus laevis GN=trmt44 PE=2 SV=1	35.3	1.4e-112
TRINITY_DN14265_c0_g3	sp|P47826|RLA0_CHICK	RPLP0	60S acidic ribosomal protein P0 OS=Gallus gallus GN=RPLP0 PE=2 SV=1	63.8	5.2e-58
TRINITY_DN14265_c0_g6	sp|Q60980|KLF3_MOUSE	Klf3	Krueppel-like factor 3 OS=Mus musculus GN=Klf3 PE=1 SV=1	35.4	8.7e-10
TRINITY_DN14268_c1_g13	sp|Q9IAK8|TBX5A_DANRE	tbx5a	T-box transcription factor TBX5-A OS=Danio rerio GN=tbx5a PE=2 SV=2	67.5	1.5e-73
TRINITY_DN14268_c1_g4	sp|Q5ZJL9|SAMH1_CHICK	SAMHD1	Deoxynucleoside triphosphate triphosphohydrolase SAMHD1 OS=Gallus gallus GN=SAMHD1 PE=2 SV=1	45.8	1.2e-71
TRINITY_DN14268_c1_g6	sp|Q9UN19|DAPP1_HUMAN	DAPP1	Dual adapter for phosphotyrosine and 3-phosphotyrosine and 3-phosphoinositide OS=Homo sapiens GN=DAPP1 PE=1 SV=1	43	2.6e-48
TRINITY_DN14269_c3_g3	sp|Q9WU70|STXB5_RAT	Stxbp5	Syntaxin-binding protein 5 OS=Rattus norvegicus GN=Stxbp5 PE=1 SV=1	35	6.2e-27
TRINITY_DN14271_c3_g1	sp|O60573|IF4E2_HUMAN	EIF4E2	Eukaryotic translation initiation factor 4E type 2 OS=Homo sapiens GN=EIF4E2 PE=1 SV=1	58	1.2e-55
TRINITY_DN14273_c2_g1	sp|Q7ZTZ2|RLP24_DANRE	rsl24d1	Probable ribosome biogenesis protein RLP24 OS=Danio rerio GN=rsl24d1 PE=2 SV=1	67.9	4.4e-49
TRINITY_DN14274_c1_g1	sp|Q86TJ2|TAD2B_HUMAN	TADA2B	Transcriptional adapter 2-beta OS=Homo sapiens GN=TADA2B PE=1 SV=2	44.1	4.1e-49
TRINITY_DN14274_c1_g2	sp|P36579|ARF1_SCHPO	arf1	ADP-ribosylation factor 1 OS=Schizosaccharomyces pombe (strain 972 / ATCC 24843) GN=arf1 PE=2 SV=2	87.6	1.4e-52
TRINITY_DN14274_c1_g3	sp|Q29451|MA2B1_BOVIN	MAN2B1	Lysosomal alpha-mannosidase OS=Bos taurus GN=MAN2B1 PE=1 SV=4	55.8	1.5e-34
TRINITY_DN14274_c1_g5	sp|O09159|MA2B1_MOUSE	Man2b1	Lysosomal alpha-mannosidase OS=Mus musculus GN=Man2b1 PE=1 SV=4	41.5	7e-91
TRINITY_DN14274_c1_g7	sp|Q3SZF2|ARF4_BOVIN	ARF4	ADP-ribosylation factor 4 OS=Bos taurus GN=ARF4 PE=2 SV=3	73.2	8.4e-20
TRINITY_DN14275_c0_g2	sp|Q3USH5|SFSWA_MOUSE	Sfswap	Splicing factor, suppressor of white-apricot homolog OS=Mus musculus GN=Sfswap PE=1 SV=2	36.8	6.2e-25
TRINITY_DN14277_c0_g1	sp|Q54VJ1|BLML2_DICDI	DDB_G0280307	Beta-lactamase-like protein 2 OS=Dictyostelium discoideum GN=DDB_G0280307 PE=3 SV=1	36.3	1e-53
TRINITY_DN14277_c4_g1	sp|P17252|KPCA_HUMAN	PRKCA	Protein kinase C alpha type OS=Homo sapiens GN=PRKCA PE=1 SV=4	54.2	3.3e-165
TRINITY_DN14278_c3_g10	sp|Q95JM8|DRC1_MACFA	DRC1	Dynein regulatory complex protein 1 OS=Macaca fascicularis GN=DRC1 PE=2 SV=2	36	3.4e-64
TRINITY_DN14278_c3_g2	sp|P25867|UBCD1_DROME	eff	Ubiquitin-conjugating enzyme E2-17 kDa OS=Drosophila melanogaster GN=eff PE=2 SV=1	75.4	7.4e-53
TRINITY_DN14278_c3_g9	sp|Q96J01|THOC3_HUMAN	THOC3	THO complex subunit 3 OS=Homo sapiens GN=THOC3 PE=1 SV=1	65.8	2.5e-123
TRINITY_DN14280_c0_g1	sp|Q5ZIN1|NUDC_CHICK	NUDC	Nuclear migration protein nudC OS=Gallus gallus GN=NUDC PE=2 SV=1	58.5	2.3e-85
TRINITY_DN14280_c0_g5	sp|Q3UVR3|TTBK2_MOUSE	Ttbk2	Tau-tubulin kinase 2 OS=Mus musculus GN=Ttbk2 PE=1 SV=1	57.8	7.5e-51
TRINITY_DN14280_c0_g6	sp|A3KMV5|UBA1_BOVIN	UBA1	Ubiquitin-like modifier-activating enzyme 1 OS=Bos taurus GN=UBA1 PE=2 SV=1	57.1	6.3e-103
TRINITY_DN14281_c0_g3	sp|P42159|RTK2_GEOCY	TK	Class II receptor tyrosine kinase OS=Geodia cydonium GN=TK PE=2 SV=2	53.6	1.6e-58
TRINITY_DN14281_c0_g4	sp|Q6ZQ08|CNOT1_MOUSE	Cnot1	CCR4-NOT transcription complex subunit 1 OS=Mus musculus GN=Cnot1 PE=1 SV=2	41.7	3.1e-145
TRINITY_DN14281_c0_g5	sp|Q6ZQ08|CNOT1_MOUSE	Cnot1	CCR4-NOT transcription complex subunit 1 OS=Mus musculus GN=Cnot1 PE=1 SV=2	53.3	0
TRINITY_DN14281_c1_g4	sp|Q96A46|MFRN2_HUMAN	SLC25A28	Mitoferrin-2 OS=Homo sapiens GN=SLC25A28 PE=2 SV=1	52.8	2.8e-84
TRINITY_DN14281_c1_g5	sp|A2BH40|ARI1A_MOUSE	Arid1a	AT-rich interactive domain-containing protein 1A OS=Mus musculus GN=Arid1a PE=1 SV=1	29.4	8.3e-87
TRINITY_DN14282_c1_g1	sp|P98077|SHC2_HUMAN	SHC2	SHC-transforming protein 2 OS=Homo sapiens GN=SHC2 PE=1 SV=4	21.4	4.7e-11
TRINITY_DN14283_c3_g1	sp|Q96A47|ISL2_HUMAN	ISL2	Insulin gene enhancer protein ISL-2 OS=Homo sapiens GN=ISL2 PE=1 SV=1	51.1	6.1e-63
TRINITY_DN14283_c4_g1	sp|Q09639|GRK2_CAEEL	grk-2	G protein-coupled receptor kinase 2 OS=Caenorhabditis elegans GN=grk-2 PE=3 SV=2	65.9	9.8e-46
TRINITY_DN14283_c4_g2	sp|Q8BRC6|MAAT1_MOUSE	Maats1	Protein MAATS1 OS=Mus musculus GN=Maats1 PE=1 SV=3	43.4	1.6e-140
TRINITY_DN14285_c0_g1	sp|Q66L42|M3K10_MOUSE	Map3k10	Mitogen-activated protein kinase kinase kinase 10 OS=Mus musculus GN=Map3k10 PE=1 SV=2	45.8	1.8e-58
TRINITY_DN14286_c0_g2	sp|P08165|ADRO_BOVIN	FDXR	NADPH:adrenodoxin oxidoreductase, mitochondrial OS=Bos taurus GN=FDXR PE=1 SV=3	55.8	1.1e-130
TRINITY_DN14289_c0_g2	sp|Q70EL1|UBP54_HUMAN	USP54	Inactive ubiquitin carboxyl-terminal hydrolase 54 OS=Homo sapiens GN=USP54 PE=1 SV=4	43.8	3.9e-89
TRINITY_DN14293_c0_g1	sp|Q9Z1N4|BPNT1_RAT	Bpnt1	3'(2'),5'-bisphosphate nucleotidase 1 OS=Rattus norvegicus GN=Bpnt1 PE=1 SV=1	37.9	4.5e-28
TRINITY_DN14294_c0_g1	sp|Q58CV5|G6PT3_BOVIN	SLC37A2	Glucose-6-phosphate exchanger SLC37A2 OS=Bos taurus GN=SLC37A2 PE=2 SV=1	43.4	8.5e-100
TRINITY_DN14295_c0_g1	sp|Q9YH85|TECTA_CHICK	TECTA	Alpha-tectorin OS=Gallus gallus GN=TECTA PE=1 SV=1	31.8	1.9e-25
TRINITY_DN14295_c0_g4	sp|P28025|KI11B_XENLA	kif11-b	Kinesin-like protein KIF11-B OS=Xenopus laevis GN=kif11-b PE=1 SV=2	65.6	1.8e-39
TRINITY_DN14295_c0_g6	sp|P52732|KIF11_HUMAN	KIF11	Kinesin-like protein KIF11 OS=Homo sapiens GN=KIF11 PE=1 SV=2	39.6	6.9e-122
TRINITY_DN14295_c0_g7	sp|G5EDW2|LPLT1_CAEEL	lat-1	Latrophilin-like protein 1 OS=Caenorhabditis elegans GN=lat-1 PE=1 SV=1	33.1	8.9e-10
TRINITY_DN14296_c0_g1	sp|Q0KIA2|Y9801_DROME	CG9801	PP2C-like domain-containing protein CG9801 OS=Drosophila melanogaster GN=CG9801 PE=2 SV=1	44.3	8.5e-42
TRINITY_DN14298_c0_g1	sp|Q6V0I7|FAT4_HUMAN	FAT4	Protocadherin Fat 4 OS=Homo sapiens GN=FAT4 PE=1 SV=2	25.8	3.6e-20
TRINITY_DN14299_c1_g1	sp|Q5JSS6|MEIG1_HUMAN	MEIG1	Meiosis expressed gene 1 protein homolog OS=Homo sapiens GN=MEIG1 PE=3 SV=1	56.2	1.9e-20
TRINITY_DN14299_c2_g1	sp|P43247|MSH2_MOUSE	Msh2	DNA mismatch repair protein Msh2 OS=Mus musculus GN=Msh2 PE=1 SV=1	50.6	2.8e-184
TRINITY_DN14299_c2_g3	sp|Q9D3A8|CAPON_MOUSE	Nos1ap	Carboxyl-terminal PDZ ligand of neuronal nitric oxide synthase protein OS=Mus musculus GN=Nos1ap PE=1 SV=3	32.7	1.3e-21
TRINITY_DN14300_c1_g1	sp|Q3UVC0|KSR2_MOUSE	Ksr2	Kinase suppressor of Ras 2 OS=Mus musculus GN=Ksr2 PE=1 SV=2	40.8	3.5e-45
TRINITY_DN14301_c1_g1	sp|Q6PHG4|LIAS_DANRE	lias	Lipoyl synthase, mitochondrial OS=Danio rerio GN=lias PE=2 SV=1	71.8	4e-133
TRINITY_DN14302_c2_g2	sp|Q9VLM5|DAD1_DROME	l(2)k12914	Dolichyl-diphosphooligosaccharide--protein glycosyltransferase subunit DAD1 OS=Drosophila melanogaster GN=l(2)k12914 PE=3 SV=1	69.8	2.4e-38
TRINITY_DN14302_c2_g3	sp|Q8JZR6|S4A8_MOUSE	Slc4a8	Electroneutral sodium bicarbonate exchanger 1 OS=Mus musculus GN=Slc4a8 PE=2 SV=1	33.5	2.7e-47
TRINITY_DN14305_c1_g2	sp|Q969G3|SMCE1_HUMAN	SMARCE1	SWI/SNF-related matrix-associated actin-dependent regulator of chromatin subfamily E member 1 OS=Homo sapiens GN=SMARCE1 PE=1 SV=2	38.4	3e-33
TRINITY_DN14306_c0_g1	sp|Q5XHF8|VIP2_XENLA	ppip5k2	Inositol hexakisphosphate and diphosphoinositol-pentakisphosphate kinase 2 OS=Xenopus laevis GN=ppip5k2 PE=2 SV=1	42.1	3.7e-31
TRINITY_DN14306_c0_g2	sp|O43314|VIP2_HUMAN	PPIP5K2	Inositol hexakisphosphate and diphosphoinositol-pentakisphosphate kinase 2 OS=Homo sapiens GN=PPIP5K2 PE=1 SV=3	43.3	1.1e-76
TRINITY_DN14306_c0_g5	sp|Q6ZQB6|VIP2_MOUSE	Ppip5k2	Inositol hexakisphosphate and diphosphoinositol-pentakisphosphate kinase 2 OS=Mus musculus GN=Ppip5k2 PE=1 SV=3	49.2	5.3e-77
TRINITY_DN14310_c1_g2	sp|A1A5V7|TM41B_DANRE	tmem41b	Transmembrane protein 41B OS=Danio rerio GN=tmem41b PE=2 SV=1	53.1	1.4e-64
TRINITY_DN14310_c2_g1	sp|Q8WV83|S35F5_HUMAN	SLC35F5	Solute carrier family 35 member F5 OS=Homo sapiens GN=SLC35F5 PE=1 SV=1	28.3	2.8e-07
TRINITY_DN14312_c5_g1	sp|B5KFI0|GET4_TAEGU	GET4	Golgi to ER traffic protein 4 homolog OS=Taeniopygia guttata GN=GET4 PE=2 SV=1	45	4.3e-30
TRINITY_DN14319_c2_g1	sp|Q9NRA2|S17A5_HUMAN	SLC17A5	Sialin OS=Homo sapiens GN=SLC17A5 PE=1 SV=2	43.8	1.5e-84
TRINITY_DN14319_c3_g1	sp|Q8QFR4|MD2L2_XENLA	mad2l2	Mitotic spindle assembly checkpoint protein MAD2B OS=Xenopus laevis GN=mad2l2 PE=1 SV=1	45.9	1.3e-24
TRINITY_DN14319_c3_g6	sp|Q6DCU6|SGMR1_XENLA	sigmar1	Sigma non-opioid intracellular receptor 1 OS=Xenopus laevis GN=sigmar1 PE=2 SV=1	54.7	8e-64
TRINITY_DN14320_c0_g12	sp|Q8WMU5|FZD6_CANLF	FZD6	Frizzled-6 OS=Canis lupus familiaris GN=FZD6 PE=2 SV=1	30.6	8.2e-07
TRINITY_DN14320_c0_g5	sp|Q0VCR1|RTF2_BOVIN	RTFDC1	Protein RTF2 homolog OS=Bos taurus GN=RTFDC1 PE=2 SV=1	38.5	1.8e-52
TRINITY_DN14321_c0_g3	sp|D4B5N0|MCPAL_ARTBC	ARB_03789	Metallocarboxypeptidase A-like protein ARB_03789 OS=Arthroderma benhamiae (strain ATCC MYA-4681 / CBS 112371) GN=ARB_03789 PE=3 SV=1	40.3	2.7e-57
TRINITY_DN14322_c0_g1	sp|Q6AUV1|XDH_ORYSJ	XDH	Xanthine dehydrogenase OS=Oryza sativa subsp. japonica GN=XDH PE=2 SV=1	43.6	1.7e-67
TRINITY_DN14322_c0_g2	sp|P54577|SYYC_HUMAN	YARS	Tyrosine--tRNA ligase, cytoplasmic OS=Homo sapiens GN=YARS PE=1 SV=4	62.1	1.4e-186
TRINITY_DN14322_c0_g3	sp|O22943|STL1_ARATH	STL1	Probable glycosyltransferase STELLO1 OS=Arabidopsis thaliana GN=STL1 PE=1 SV=1	28.4	5.6e-39
TRINITY_DN14324_c0_g2	sp|B5FYY5|LTOR2_TAEGU	LAMTOR2	Ragulator complex protein LAMTOR2 OS=Taeniopygia guttata GN=LAMTOR2 PE=2 SV=1	56.4	3.6e-28
TRINITY_DN14325_c2_g1	sp|Q5VTL8|PR38B_HUMAN	PRPF38B	Pre-mRNA-splicing factor 38B OS=Homo sapiens GN=PRPF38B PE=1 SV=1	38.4	1.3e-36
TRINITY_DN14325_c2_g2	sp|Q29361|RL35_PIG	RPL35	60S ribosomal protein L35 OS=Sus scrofa GN=RPL35 PE=1 SV=3	73	6.9e-38
TRINITY_DN14326_c0_g1	sp|Q86B09|PMM2_DICDI	pmmB	Phosphomannomutase 2 OS=Dictyostelium discoideum GN=pmmB PE=3 SV=2	62.9	3.6e-29
TRINITY_DN14328_c6_g1	sp|Q2TA68|OPA1_RAT	Opa1	Dynamin-like 120 kDa protein, mitochondrial OS=Rattus norvegicus GN=Opa1 PE=1 SV=1	47.8	2.5e-183
TRINITY_DN14328_c8_g1	sp|Q12866|MERTK_HUMAN	MERTK	Tyrosine-protein kinase Mer OS=Homo sapiens GN=MERTK PE=1 SV=2	42.1	5.7e-66
TRINITY_DN14330_c1_g2	sp|Q8VIP2|MLXPL_RAT	Mlxipl	Carbohydrate-responsive element-binding protein OS=Rattus norvegicus GN=Mlxipl PE=1 SV=1	45.3	1.1e-45
TRINITY_DN14330_c1_g3	sp|P57747|VATD_SUBDO	VATPD	V-type proton ATPase subunit D OS=Suberites domuncula GN=VATPD PE=2 SV=1	78.8	5e-85
TRINITY_DN14331_c3_g1	sp|Q5JU67|CF157_HUMAN	CFAP157	Cilia- and flagella-associated protein 157 OS=Homo sapiens GN=CFAP157 PE=2 SV=1	35.7	1.8e-31
TRINITY_DN14331_c3_g2	sp|Q6NSM8|SIK3_DANRE	zgc:66101	Serine/threonine-protein kinase SIK3 homolog OS=Danio rerio GN=zgc:66101 PE=2 SV=1	44.5	1.2e-100
TRINITY_DN14332_c1_g2	sp|Q9JLM8|DCLK1_MOUSE	Dclk1	Serine/threonine-protein kinase DCLK1 OS=Mus musculus GN=Dclk1 PE=1 SV=1	30.3	6.7e-19
TRINITY_DN14332_c1_g6	sp|Q9QZD5|RAE2_MOUSE	Chml	Rab proteins geranylgeranyltransferase component A 2 OS=Mus musculus GN=Chml PE=2 SV=2	32.7	1.3e-86
TRINITY_DN14333_c2_g4	sp|Q8BQM8|EMAL5_MOUSE	Eml5	Echinoderm microtubule-associated protein-like 5 OS=Mus musculus GN=Eml5 PE=2 SV=2	50.7	1.8e-207
TRINITY_DN14334_c1_g1	sp|Q4V7F3|OSGP2_RAT	Osgepl1	Probable tRNA N6-adenosine threonylcarbamoyltransferase, mitochondrial OS=Rattus norvegicus GN=Osgepl1 PE=2 SV=1	44.3	7e-58
TRINITY_DN14334_c2_g2	sp|Q5XIP9|TMM43_RAT	Tmem43	Transmembrane protein 43 OS=Rattus norvegicus GN=Tmem43 PE=2 SV=1	39.5	1.6e-55
TRINITY_DN14335_c0_g3	sp|Q22306|YW12_CAEEL	T07D4.2	UPF0046 protein T07D4.2 OS=Caenorhabditis elegans GN=T07D4.2 PE=1 SV=3	35.1	3.7e-56
TRINITY_DN14340_c1_g1	sp|Q3SZU5|SPCS3_BOVIN	SPCS3	Signal peptidase complex subunit 3 OS=Bos taurus GN=SPCS3 PE=2 SV=1	51.1	2.1e-41
TRINITY_DN14340_c1_g2	sp|P62068|UBP46_HUMAN	USP46	Ubiquitin carboxyl-terminal hydrolase 46 OS=Homo sapiens GN=USP46 PE=1 SV=1	69.1	4.5e-100
TRINITY_DN14340_c1_g3	sp|P82094|TMF1_HUMAN	TMF1	TATA element modulatory factor OS=Homo sapiens GN=TMF1 PE=1 SV=2	40.1	7.9e-24
TRINITY_DN14341_c0_g2	sp|Q66HX0|S35B1_DANRE	slc35b1	Solute carrier family 35 member B1 OS=Danio rerio GN=slc35b1 PE=2 SV=1	49.4	9e-74
TRINITY_DN14344_c0_g1	sp|Q9UGM3|DMBT1_HUMAN	DMBT1	Deleted in malignant brain tumors 1 protein OS=Homo sapiens GN=DMBT1 PE=1 SV=2	34.8	6.5e-57
TRINITY_DN14344_c1_g4	sp|Q7ZWC4|PELO_DANRE	pelo	Protein pelota homolog OS=Danio rerio GN=pelo PE=2 SV=1	64.4	4.2e-109
TRINITY_DN14346_c0_g1	sp|O14662|STX16_HUMAN	STX16	Syntaxin-16 OS=Homo sapiens GN=STX16 PE=1 SV=3	45.2	8.8e-49
TRINITY_DN14346_c0_g8	sp|Q96LK0|CEP19_HUMAN	CEP19	Centrosomal protein of 19 kDa OS=Homo sapiens GN=CEP19 PE=1 SV=2	49.2	1.2e-06
TRINITY_DN14348_c0_g11	sp|Q6NS09|TM45B_XENLA	tmem45b	Transmembrane protein 45B OS=Xenopus laevis GN=tmem45b PE=2 SV=1	24.8	1.8e-16
TRINITY_DN14349_c1_g1	sp|Q962X9|BUD31_BRABE	-	Protein BUD31 homolog OS=Branchiostoma belcheri PE=2 SV=1	92.2	5.3e-21
TRINITY_DN14349_c2_g1	sp|P61266|STX1B_HUMAN	STX1B	Syntaxin-1B OS=Homo sapiens GN=STX1B PE=1 SV=1	32.3	1.3e-15
TRINITY_DN14349_c2_g7	sp|O95336|6PGL_HUMAN	PGLS	6-phosphogluconolactonase OS=Homo sapiens GN=PGLS PE=1 SV=2	47.5	1.7e-55
TRINITY_DN14350_c2_g6	sp|Q5E9J2|CNPD1_BOVIN	CNPPD1	Protein CNPPD1 OS=Bos taurus GN=CNPPD1 PE=2 SV=1	34.5	2.1e-32
TRINITY_DN14351_c1_g3	sp|Q9BXI2|ORNT2_HUMAN	SLC25A2	Mitochondrial ornithine transporter 2 OS=Homo sapiens GN=SLC25A2 PE=1 SV=3	46.4	7.1e-27
TRINITY_DN14351_c1_g5	sp|O95847|UCP4_HUMAN	SLC25A27	Mitochondrial uncoupling protein 4 OS=Homo sapiens GN=SLC25A27 PE=2 SV=1	52.6	2.1e-91
TRINITY_DN14352_c0_g1	sp|Q6TNS7|RABL3_DANRE	rabl3	Rab-like protein 3 OS=Danio rerio GN=rabl3 PE=2 SV=1	42.8	3.5e-41
TRINITY_DN14353_c1_g1	sp|P09139|SPYA_RAT	Agxt	Serine--pyruvate aminotransferase, mitochondrial OS=Rattus norvegicus GN=Agxt PE=1 SV=1	51.5	1.1e-109
TRINITY_DN14354_c0_g3	sp|P26810|POL_MLVF5	pol	Pol polyprotein OS=Friend murine leukemia virus (isolate 57) GN=pol PE=3 SV=1	30	7.5e-08
TRINITY_DN14355_c1_g1	sp|O14733|MP2K7_HUMAN	MAP2K7	Dual specificity mitogen-activated protein kinase kinase 7 OS=Homo sapiens GN=MAP2K7 PE=1 SV=2	56	3.3e-74
TRINITY_DN14357_c0_g1	sp|Q99807|COQ7_HUMAN	COQ7	5-demethoxyubiquinone hydroxylase, mitochondrial OS=Homo sapiens GN=COQ7 PE=1 SV=3	53.3	2.1e-45
TRINITY_DN14357_c2_g1	sp|Q4R4S5|LICH_MACFA	LIPA	Lysosomal acid lipase/cholesteryl ester hydrolase OS=Macaca fascicularis GN=LIPA PE=2 SV=1	32.9	4.1e-48
TRINITY_DN14358_c1_g3	sp|Q8R5L3|VPS39_MOUSE	Vps39	Vam6/Vps39-like protein OS=Mus musculus GN=Vps39 PE=1 SV=1	45.2	1.1e-108
TRINITY_DN14358_c1_g7	sp|Q96JC1|VPS39_HUMAN	VPS39	Vam6/Vps39-like protein OS=Homo sapiens GN=VPS39 PE=1 SV=2	35.4	1.6e-50
TRINITY_DN14361_c3_g2	sp|Q5RC80|RBM39_PONAB	RBM39	RNA-binding protein 39 OS=Pongo abelii GN=RBM39 PE=2 SV=1	48.6	9.2e-91
TRINITY_DN14362_c0_g1	sp|Q8RYE9|GPPL3_ARATH	At2g33255	Haloacid dehalogenase-like hydrolase domain-containing protein At2g33255 OS=Arabidopsis thaliana GN=At2g33255 PE=1 SV=1	35.4	1.7e-28
TRINITY_DN14363_c0_g3	sp|Q5TCZ1|SPD2A_HUMAN	SH3PXD2A	SH3 and PX domain-containing protein 2A OS=Homo sapiens GN=SH3PXD2A PE=1 SV=1	41.1	5.5e-14
TRINITY_DN14364_c0_g11	sp|Q9DEB5|FZ10A_XENLA	fzd10-a	Frizzled-10-A OS=Xenopus laevis GN=fzd10-a PE=2 SV=1	36.4	1.1e-54
TRINITY_DN14364_c0_g2	sp|O15514|RPB4_HUMAN	POLR2D	DNA-directed RNA polymerase II subunit RPB4 OS=Homo sapiens GN=POLR2D PE=1 SV=1	60.7	6.5e-35
TRINITY_DN14364_c0_g3	sp|Q6P5E8|DGKQ_MOUSE	Dgkq	Diacylglycerol kinase theta OS=Mus musculus GN=Dgkq PE=1 SV=1	30.1	9.5e-42
TRINITY_DN14364_c0_g5	sp|Q8BHB4|WDR3_MOUSE	Wdr3	WD repeat-containing protein 3 OS=Mus musculus GN=Wdr3 PE=1 SV=1	60.4	1.2e-132
TRINITY_DN14364_c0_g7	sp|Q9H501|ESF1_HUMAN	ESF1	ESF1 homolog OS=Homo sapiens GN=ESF1 PE=1 SV=1	47.3	1.7e-69
TRINITY_DN14364_c1_g1	sp|Q6DGV1|CELF4_DANRE	celf4	CUGBP Elav-like family member 4 OS=Danio rerio GN=celf4 PE=2 SV=1	60.1	1.3e-55
TRINITY_DN14365_c4_g2	sp|A9Z1V5|VW5B1_MOUSE	Vwa5b1	von Willebrand factor A domain-containing protein 5B1 OS=Mus musculus GN=Vwa5b1 PE=2 SV=1	39.5	4.8e-42
TRINITY_DN14367_c1_g2	sp|B0V2N1|PTPRS_MOUSE	Ptprs	Receptor-type tyrosine-protein phosphatase S OS=Mus musculus GN=Ptprs PE=1 SV=1	28.3	9.4e-34
TRINITY_DN14367_c1_g3	sp|P16621|LAR_DROME	Lar	Tyrosine-protein phosphatase Lar OS=Drosophila melanogaster GN=Lar PE=1 SV=2	40.8	1.6e-15
TRINITY_DN14369_c0_g1	sp|P49281|NRAM2_HUMAN	SLC11A2	Natural resistance-associated macrophage protein 2 OS=Homo sapiens GN=SLC11A2 PE=1 SV=2	49.2	5.4e-122
TRINITY_DN14372_c0_g2	sp|Q6MG55|ABHGA_RAT	Abhd16a	Protein ABHD16A OS=Rattus norvegicus GN=Abhd16a PE=2 SV=1	47.5	3.6e-70
TRINITY_DN14373_c1_g2	sp|O73817|PSB3_ONCMY	psmb3	Proteasome subunit beta type-3 OS=Oncorhynchus mykiss GN=psmb3 PE=2 SV=1	70	1.4e-75
TRINITY_DN14376_c3_g4	sp|Q6V0I7|FAT4_HUMAN	FAT4	Protocadherin Fat 4 OS=Homo sapiens GN=FAT4 PE=1 SV=2	28	1.3e-82
TRINITY_DN14377_c0_g1	sp|Q5TG30|RHG40_HUMAN	ARHGAP40	Rho GTPase-activating protein 40 OS=Homo sapiens GN=ARHGAP40 PE=3 SV=3	41.6	1.3e-19
TRINITY_DN14379_c2_g1	sp|O00764|PDXK_HUMAN	PDXK	Pyridoxal kinase OS=Homo sapiens GN=PDXK PE=1 SV=1	45.6	8.2e-36
TRINITY_DN14379_c2_g3	sp|Q7TQJ8|WTIP_MOUSE	Wtip	Wilms tumor protein 1-interacting protein OS=Mus musculus GN=Wtip PE=1 SV=1	41.9	1.4e-46
TRINITY_DN14382_c0_g2	sp|Q5TZ80|HOOK1_DANRE	hook1	Protein Hook homolog 1 OS=Danio rerio GN=hook1 PE=2 SV=1	35.8	1.8e-42
TRINITY_DN14385_c1_g1	sp|Q64727|VINC_MOUSE	Vcl	Vinculin OS=Mus musculus GN=Vcl PE=1 SV=4	44.2	5.5e-72
TRINITY_DN14385_c1_g2	sp|Q5ZM57|HACD3_CHICK	HACD3	Very-long-chain (3R)-3-hydroxyacyl-CoA dehydratase OS=Gallus gallus GN=HACD3 PE=2 SV=1	35.8	3.2e-55
TRINITY_DN14385_c2_g3	sp|Q5F470|RAB8A_CHICK	RAB8A	Ras-related protein Rab-8A OS=Gallus gallus GN=RAB8A PE=2 SV=1	33.1	1.1e-09
TRINITY_DN14385_c2_g4	sp|Q0VFP5|CWC15_XENTR	cwc15	Protein CWC15 homolog OS=Xenopus tropicalis GN=cwc15 PE=2 SV=1	62.1	2.7e-34
TRINITY_DN14385_c2_g5	sp|Q7T3A4|RAB13_DANRE	rab13	Ras-related protein Rab-13 OS=Danio rerio GN=rab13 PE=1 SV=1	46.2	3.5e-17
TRINITY_DN14387_c0_g1	sp|Q9Y3D3|RT16_HUMAN	MRPS16	28S ribosomal protein S16, mitochondrial OS=Homo sapiens GN=MRPS16 PE=1 SV=1	54.8	4.2e-28
TRINITY_DN14388_c2_g4	sp|Q9BRI3|ZNT2_HUMAN	SLC30A2	Zinc transporter 2 OS=Homo sapiens GN=SLC30A2 PE=1 SV=1	43.4	1.2e-33
TRINITY_DN14389_c3_g1	sp|E9PT23|S38AA_RAT	Slc38a10	Putative sodium-coupled neutral amino acid transporter 10 OS=Rattus norvegicus GN=Slc38a10 PE=1 SV=2	24.4	2.7e-24
TRINITY_DN14392_c0_g2	sp|Q6PCJ9|PPT2A_XENLA	ppt2-a	Lysosomal thioesterase PPT2-A OS=Xenopus laevis GN=ppt2-a PE=2 SV=1	44.9	1.7e-74
TRINITY_DN14394_c0_g4	sp|Q5RKZ7|MOCS1_MOUSE	Mocs1	Molybdenum cofactor biosynthesis protein 1 OS=Mus musculus GN=Mocs1 PE=1 SV=2	50.3	1.5e-140
TRINITY_DN14394_c0_g7	sp|Q9NZB8|MOCS1_HUMAN	MOCS1	Molybdenum cofactor biosynthesis protein 1 OS=Homo sapiens GN=MOCS1 PE=1 SV=3	84.4	4.6e-16
TRINITY_DN14396_c0_g2	sp|Q05744|CATD_CHICK	CTSD	Cathepsin D OS=Gallus gallus GN=CTSD PE=1 SV=1	56.4	1.4e-116
TRINITY_DN14396_c0_g3	sp|Q9H8U3|ZFAN3_HUMAN	ZFAND3	AN1-type zinc finger protein 3 OS=Homo sapiens GN=ZFAND3 PE=1 SV=1	56.2	4.4e-18
TRINITY_DN14397_c0_g1	sp|Q75Q39|TOM70_RAT	Tomm70	Mitochondrial import receptor subunit TOM70 OS=Rattus norvegicus GN=Tomm70 PE=1 SV=1	42.5	2.1e-13
TRINITY_DN14397_c0_g2	sp|Q91Z38|TTC1_MOUSE	Ttc1	Tetratricopeptide repeat protein 1 OS=Mus musculus GN=Ttc1 PE=1 SV=1	61.4	2e-23
TRINITY_DN14397_c2_g2	sp|Q8R5C5|ACTY_MOUSE	Actr1b	Beta-centractin OS=Mus musculus GN=Actr1b PE=1 SV=1	50.2	2.9e-101
TRINITY_DN14397_c2_g3	sp|P85037|FOXK1_HUMAN	FOXK1	Forkhead box protein K1 OS=Homo sapiens GN=FOXK1 PE=1 SV=1	37	4.4e-72
TRINITY_DN14397_c2_g4	sp|Q9C509|SGPL_ARATH	DPL1	Sphingosine-1-phosphate lyase OS=Arabidopsis thaliana GN=DPL1 PE=1 SV=1	36.7	3.6e-95
TRINITY_DN14397_c2_g9	sp|Q4U0Y4|NPL1A_XENLA	nap1l1-a	Nucleosome assembly protein 1-like 1-A OS=Xenopus laevis GN=nap1l1-a PE=1 SV=1	45.6	1.3e-72
TRINITY_DN14398_c1_g1	sp|O04035|AT74H_ARATH	At1g08940	Phosphoglycerate mutase-like protein AT74H OS=Arabidopsis thaliana GN=At1g08940 PE=3 SV=2	46.3	5e-32
TRINITY_DN14402_c0_g1	sp|Q08DZ8|PRIPO_BOVIN	PRIMPOL	DNA-directed primase/polymerase protein OS=Bos taurus GN=PRIMPOL PE=2 SV=1	48.1	1.2e-09
TRINITY_DN14402_c0_g2	sp|Q32PL8|PRIPO_DANRE	primpol	DNA-directed primase/polymerase protein OS=Danio rerio GN=primpol PE=2 SV=2	43.6	4.1e-30
TRINITY_DN14402_c1_g2	sp|O95347|SMC2_HUMAN	SMC2	Structural maintenance of chromosomes protein 2 OS=Homo sapiens GN=SMC2 PE=1 SV=2	62.9	6.1e-123
TRINITY_DN14402_c2_g2	sp|Q90988|SMC2_CHICK	SMC2	Structural maintenance of chromosomes protein 2 OS=Gallus gallus GN=SMC2 PE=2 SV=1	50.7	6.8e-128
TRINITY_DN14405_c2_g4	sp|Q9H3G5|CPVL_HUMAN	CPVL	Probable serine carboxypeptidase CPVL OS=Homo sapiens GN=CPVL PE=1 SV=2	52.3	2.3e-135
TRINITY_DN14406_c0_g1	sp|Q8WZA2|RPGF4_HUMAN	RAPGEF4	Rap guanine nucleotide exchange factor 4 OS=Homo sapiens GN=RAPGEF4 PE=1 SV=1	39.5	1.6e-47
TRINITY_DN14407_c0_g1	sp|P80147|GABT_PIG	ABAT	4-aminobutyrate aminotransferase, mitochondrial OS=Sus scrofa GN=ABAT PE=1 SV=2	48.1	1.2e-111
TRINITY_DN14407_c0_g2	sp|P57760|STK16_RAT	Stk16	Serine/threonine-protein kinase 16 OS=Rattus norvegicus GN=Stk16 PE=2 SV=2	41.2	5.1e-49
TRINITY_DN14408_c0_g1	sp|Q5ZHN1|CHM2A_CHICK	CHMP2A	Charged multivesicular body protein 2a OS=Gallus gallus GN=CHMP2A PE=2 SV=1	38.7	2.8e-11
TRINITY_DN14408_c0_g4	sp|Q8BMS4|COQ3_MOUSE	Coq3	Ubiquinone biosynthesis O-methyltransferase, mitochondrial OS=Mus musculus GN=Coq3 PE=1 SV=1	52.5	8.7e-50
TRINITY_DN14410_c0_g1	sp|Q1JP73|CI064_BOVIN	-	UPF0553 protein C9orf64 homolog OS=Bos taurus PE=2 SV=1	39.7	1.3e-07
TRINITY_DN14410_c0_g3	sp|Q1JP73|CI064_BOVIN	-	UPF0553 protein C9orf64 homolog OS=Bos taurus PE=2 SV=1	42.2	5.8e-51
TRINITY_DN14411_c1_g1	sp|O00487|PSDE_HUMAN	PSMD14	26S proteasome non-ATPase regulatory subunit 14 OS=Homo sapiens GN=PSMD14 PE=1 SV=1	81.9	1.7e-130
TRINITY_DN14412_c1_g1	sp|Q9UHX1|PUF60_HUMAN	PUF60	Poly(U)-binding-splicing factor PUF60 OS=Homo sapiens GN=PUF60 PE=1 SV=1	45.4	2.6e-117
TRINITY_DN14412_c1_g3	sp|Q08806|AMY2_SCHOC	SWA2	Alpha-amylase 2 OS=Schwanniomyces occidentalis GN=SWA2 PE=3 SV=1	40.8	3.3e-95
TRINITY_DN14412_c1_g4	sp|P97756|KKCC1_RAT	Camkk1	Calcium/calmodulin-dependent protein kinase kinase 1 OS=Rattus norvegicus GN=Camkk1 PE=1 SV=1	41.1	5.6e-25
TRINITY_DN14413_c0_g2	sp|P42686|SRK1_SPOLA	SRK1	Tyrosine-protein kinase isoform SRK1 OS=Spongilla lacustris GN=SRK1 PE=2 SV=1	77.2	2.1e-74
TRINITY_DN14416_c0_g1	sp|Q2PZL6|FAT4_MOUSE	Fat4	Protocadherin Fat 4 OS=Mus musculus GN=Fat4 PE=1 SV=2	25.9	6.5e-57
TRINITY_DN14419_c1_g1	sp|Q8WX92|NELFB_HUMAN	NELFB	Negative elongation factor B OS=Homo sapiens GN=NELFB PE=1 SV=1	38.8	9.8e-73
TRINITY_DN14419_c1_g4	sp|P56965|DDAH1_BOVIN	DDAH1	N(G),N(G)-dimethylarginine dimethylaminohydrolase 1 OS=Bos taurus GN=DDAH1 PE=1 SV=3	46.2	7.4e-31
TRINITY_DN14419_c1_g6	sp|P56965|DDAH1_BOVIN	DDAH1	N(G),N(G)-dimethylarginine dimethylaminohydrolase 1 OS=Bos taurus GN=DDAH1 PE=1 SV=3	46	1.5e-16
TRINITY_DN14419_c2_g1	sp|Q8TF05|PP4R1_HUMAN	PPP4R1	Serine/threonine-protein phosphatase 4 regulatory subunit 1 OS=Homo sapiens GN=PPP4R1 PE=1 SV=1	27.1	3.6e-66
TRINITY_DN14420_c1_g7	sp|O43242|PSMD3_HUMAN	PSMD3	26S proteasome non-ATPase regulatory subunit 3 OS=Homo sapiens GN=PSMD3 PE=1 SV=2	60.5	6e-161
TRINITY_DN14421_c0_g2	sp|Q3UQ28|PXDN_MOUSE	Pxdn	Peroxidasin homolog OS=Mus musculus GN=Pxdn PE=1 SV=2	28.4	4.3e-14
TRINITY_DN14424_c0_g1	sp|Q58EK5|TDRD1_DANRE	tdrd1	Tudor domain-containing protein 1 OS=Danio rerio GN=tdrd1 PE=1 SV=2	21.1	9.5e-08
TRINITY_DN14426_c0_g1	sp|Q8K4R9|DLGP5_MOUSE	Dlgap5	Disks large-associated protein 5 OS=Mus musculus GN=Dlgap5 PE=1 SV=2	39.3	2.4e-17
TRINITY_DN14427_c0_g2	sp|Q5R9I5|SYDC_PONAB	DARS	Aspartate--tRNA ligase, cytoplasmic OS=Pongo abelii GN=DARS PE=2 SV=1	65.7	7e-184
TRINITY_DN14427_c0_g4	sp|O35454|CLCN6_MOUSE	Clcn6	Chloride transport protein 6 OS=Mus musculus GN=Clcn6 PE=1 SV=1	43.4	1.1e-103
TRINITY_DN14427_c0_g5	sp|O35454|CLCN6_MOUSE	Clcn6	Chloride transport protein 6 OS=Mus musculus GN=Clcn6 PE=1 SV=1	38.8	6.4e-105
TRINITY_DN14429_c2_g1	sp|Q9N0E7|MOCOS_BOVIN	MOCOS	Molybdenum cofactor sulfurase OS=Bos taurus GN=MOCOS PE=2 SV=3	49.2	2.1e-101
TRINITY_DN14429_c2_g6	sp|Q5ZIT5|RAB10_CHICK	RAB10	Ras-related protein Rab-10 OS=Gallus gallus GN=RAB10 PE=2 SV=1	42.5	2.7e-23
TRINITY_DN14430_c2_g6	sp|Q14919|NC2A_HUMAN	DRAP1	Dr1-associated corepressor OS=Homo sapiens GN=DRAP1 PE=1 SV=3	55.9	9.1e-25
TRINITY_DN14431_c1_g2	sp|Q8IYU8|MICU2_HUMAN	MICU2	Calcium uptake protein 2, mitochondrial OS=Homo sapiens GN=MICU2 PE=1 SV=2	36.1	1.4e-49
TRINITY_DN14433_c2_g12	sp|A2VDN6|SF3A1_BOVIN	SF3A1	Splicing factor 3A subunit 1 OS=Bos taurus GN=SF3A1 PE=2 SV=1	51.7	3.7e-132
TRINITY_DN14435_c1_g14	sp|Q8TGM5|ART3_YEAST	ART3	Putative uncharacterized protein ART3 OS=Saccharomyces cerevisiae (strain ATCC 204508 / S288c) GN=ART3 PE=5 SV=1	76.2	8.9e-10
TRINITY_DN14435_c1_g4	sp|Q8TGM5|ART3_YEAST	ART3	Putative uncharacterized protein ART3 OS=Saccharomyces cerevisiae (strain ATCC 204508 / S288c) GN=ART3 PE=5 SV=1	74.4	3.7e-08
TRINITY_DN14437_c0_g1	sp|O34363|YOBN_BACSU	yobN	Putative L-amino-acid oxidase YobN OS=Bacillus subtilis (strain 168) GN=yobN PE=3 SV=3	36.2	1.4e-24
TRINITY_DN14442_c0_g1	sp|Q8NI77|KI18A_HUMAN	KIF18A	Kinesin-like protein KIF18A OS=Homo sapiens GN=KIF18A PE=1 SV=2	24.3	3.3e-15
TRINITY_DN14443_c0_g1	sp|Q6ZNA5|FRRS1_HUMAN	FRRS1	Ferric-chelate reductase 1 OS=Homo sapiens GN=FRRS1 PE=2 SV=2	29.7	9.5e-08
TRINITY_DN14444_c3_g4	sp|Q1RLY6|KMO_DANRE	kmo	Kynurenine 3-monooxygenase OS=Danio rerio GN=kmo PE=2 SV=1	52.6	2.7e-120
TRINITY_DN14446_c1_g10	sp|Q8TC41|RN217_HUMAN	RNF217	Probable E3 ubiquitin-protein ligase RNF217 OS=Homo sapiens GN=RNF217 PE=2 SV=4	39.2	1.2e-44
TRINITY_DN14446_c1_g5	sp|Q6NT04|TIGD7_HUMAN	TIGD7	Tigger transposable element-derived protein 7 OS=Homo sapiens GN=TIGD7 PE=1 SV=1	25.6	4.9e-34
TRINITY_DN14446_c1_g6	sp|Q4KLT0|RN217_XENLA	rnf217	Probable E3 ubiquitin-protein ligase RNF217 OS=Xenopus laevis GN=rnf217 PE=2 SV=1	42.9	2.1e-48
TRINITY_DN14449_c0_g10	sp|P62194|PRS8_BOVIN	PSMC5	26S protease regulatory subunit 8 OS=Bos taurus GN=PSMC5 PE=2 SV=1	87.1	6.4e-153
TRINITY_DN14449_c0_g6	sp|Q9VVI9|CHMP5_DROME	Vps60	Charged multivesicular body protein 5 OS=Drosophila melanogaster GN=Vps60 PE=1 SV=2	53	1.7e-47
TRINITY_DN14450_c0_g1	sp|Q6NUH3|NOSIP_XENLA	nosip	Nitric oxide synthase-interacting protein OS=Xenopus laevis GN=nosip PE=2 SV=1	48.4	8.8e-59
TRINITY_DN14451_c1_g2	sp|Q9HD45|TM9S3_HUMAN	TM9SF3	Transmembrane 9 superfamily member 3 OS=Homo sapiens GN=TM9SF3 PE=1 SV=2	70.2	9.5e-107
TRINITY_DN14451_c1_g7	sp|Q9HD45|TM9S3_HUMAN	TM9SF3	Transmembrane 9 superfamily member 3 OS=Homo sapiens GN=TM9SF3 PE=1 SV=2	66	3.7e-79
TRINITY_DN14452_c0_g1	sp|Q6NZF1|ZC11A_MOUSE	Zc3h11a	Zinc finger CCCH domain-containing protein 11A OS=Mus musculus GN=Zc3h11a PE=1 SV=1	34.1	1.4e-23
TRINITY_DN14453_c0_g1	sp|Q8HZK2|DUOX2_PIG	DUOX2	Dual oxidase 2 OS=Sus scrofa GN=DUOX2 PE=1 SV=2	48.7	6.9e-178
TRINITY_DN14455_c0_g1	sp|Q8R2Y3|DOLK_MOUSE	Dolk	Dolichol kinase OS=Mus musculus GN=Dolk PE=1 SV=1	34.9	1.4e-41
TRINITY_DN14455_c0_g2	sp|Q42342|CYB5E_ARATH	CYTB5-E	Cytochrome b5 isoform E OS=Arabidopsis thaliana GN=CYTB5-E PE=1 SV=2	42.5	1.1e-20
TRINITY_DN14455_c0_g5	sp|Q32P85|DLRB2_BOVIN	DYNLRB2	Dynein light chain roadblock-type 2 OS=Bos taurus GN=DYNLRB2 PE=3 SV=1	75	2.2e-35
TRINITY_DN14456_c1_g1	sp|P0C1J5|FKB2B_RHIO9	FKBP3	FK506-binding protein 2B OS=Rhizopus delemar (strain RA 99-880 / ATCC MYA-4621 / FGSC 9543 / NRRL 43880) GN=FKBP3 PE=3 SV=1	47.1	5.8e-27
TRINITY_DN14460_c0_g3	sp|Q62377|U2AFM_MOUSE	Zrsr2	U2 small nuclear ribonucleoprotein auxiliary factor 35 kDa subunit-related protein 2 OS=Mus musculus GN=Zrsr2 PE=1 SV=1	58.1	4.6e-69
TRINITY_DN14461_c0_g7	sp|Q6INX3|MLECA_XENLA	mlec-a	Malectin-A OS=Xenopus laevis GN=mlec-a PE=1 SV=1	45.6	6e-51
TRINITY_DN14461_c0_g8	sp|O14965|AURKA_HUMAN	AURKA	Aurora kinase A OS=Homo sapiens GN=AURKA PE=1 SV=2	70.1	1.6e-118
TRINITY_DN14463_c0_g1	sp|Q9UBY8|CLN8_HUMAN	CLN8	Protein CLN8 OS=Homo sapiens GN=CLN8 PE=1 SV=3	38.7	2.5e-41
TRINITY_DN14464_c0_g1	sp|Q9D554|SF3A3_MOUSE	Sf3a3	Splicing factor 3A subunit 3 OS=Mus musculus GN=Sf3a3 PE=1 SV=2	57.3	4.5e-112
TRINITY_DN14464_c1_g7	sp|Q05D44|IF2P_MOUSE	Eif5b	Eukaryotic translation initiation factor 5B OS=Mus musculus GN=Eif5b PE=1 SV=2	65.4	5.9e-230
TRINITY_DN14465_c0_g1	sp|Q66LN0|PGES2_BOVIN	PTGES2	Prostaglandin E synthase 2 OS=Bos taurus GN=PTGES2 PE=1 SV=3	40.7	8.6e-57
TRINITY_DN14465_c0_g6	sp|Q8CHN6|SGPL1_RAT	Sgpl1	Sphingosine-1-phosphate lyase 1 OS=Rattus norvegicus GN=Sgpl1 PE=2 SV=1	50.1	8.6e-156
TRINITY_DN14467_c3_g2	sp|P30876|RPB2_HUMAN	POLR2B	DNA-directed RNA polymerase II subunit RPB2 OS=Homo sapiens GN=POLR2B PE=1 SV=1	84.7	0
TRINITY_DN14468_c0_g1	sp|Q28XE2|AN32A_DROPS	Anp32a	Acidic leucine-rich nuclear phosphoprotein 32 family member A OS=Drosophila pseudoobscura pseudoobscura GN=Anp32a PE=3 SV=2	47.9	3.2e-31
TRINITY_DN14468_c0_g2	sp|Q4V7Q1|RM52_XENLA	mrpl52	39S ribosomal protein L52, mitochondrial OS=Xenopus laevis GN=mrpl52 PE=2 SV=1	44.8	3.4e-16
TRINITY_DN14469_c4_g1	sp|Q6P6Z8|ODO1_XENLA	ogdh	2-oxoglutarate dehydrogenase, mitochondrial OS=Xenopus laevis GN=ogdh PE=2 SV=1	59.3	3.2e-171
TRINITY_DN14469_c4_g2	sp|F1MH24|AAK1_BOVIN	AAK1	AP2-associated protein kinase 1 OS=Bos taurus GN=AAK1 PE=1 SV=2	49.9	1.3e-89
TRINITY_DN14469_c4_g4	sp|Q623T0|ODO1_CAEBR	ogdh-1	2-oxoglutarate dehydrogenase, mitochondrial OS=Caenorhabditis briggsae GN=ogdh-1 PE=3 SV=1	88	1.8e-06
TRINITY_DN1446_c0_g1	sp|Q99N89|RM43_MOUSE	Mrpl43	39S ribosomal protein L43, mitochondrial OS=Mus musculus GN=Mrpl43 PE=1 SV=1	35.9	1.2e-21
TRINITY_DN14470_c2_g1	sp|Q9U9P7|PITC1_DROME	rdgBbeta	Cytoplasmic phosphatidylinositol transfer protein 1 OS=Drosophila melanogaster GN=rdgBbeta PE=2 SV=1	61	4.6e-93
TRINITY_DN14470_c4_g11	sp|Q6DRJ9|RIC8B_DANRE	ric8b	Synembryn-B OS=Danio rerio GN=ric8b PE=2 SV=1	28.6	1.8e-42
TRINITY_DN14470_c4_g5	sp|Q6PDL0|DC1L2_MOUSE	Dync1li2	Cytoplasmic dynein 1 light intermediate chain 2 OS=Mus musculus GN=Dync1li2 PE=1 SV=2	41.6	1.5e-91
TRINITY_DN14471_c1_g2	sp|O73787|GCP3_XENLA	tubgcp3	Gamma-tubulin complex component 3 homolog OS=Xenopus laevis GN=tubgcp3 PE=1 SV=1	44.1	1.6e-181
TRINITY_DN14472_c0_g1	sp|Q07DW1|TES_AOTNA	TES	Testin OS=Aotus nancymaae GN=TES PE=3 SV=1	41	1.9e-91
TRINITY_DN14481_c1_g1	sp|Q9CTG6|AT132_MOUSE	Atp13a2	Probable cation-transporting ATPase 13A2 OS=Mus musculus GN=Atp13a2 PE=2 SV=3	37.7	2.9e-44
TRINITY_DN14481_c1_g2	sp|Q9NQ11|AT132_HUMAN	ATP13A2	Probable cation-transporting ATPase 13A2 OS=Homo sapiens GN=ATP13A2 PE=1 SV=2	42.4	2e-53
TRINITY_DN14485_c0_g1	sp|Q5XK84|CARM1_XENLA	carm1	Histone-arginine methyltransferase CARM1 OS=Xenopus laevis GN=carm1 PE=2 SV=1	55.5	1.6e-133
TRINITY_DN14485_c1_g1	sp|Q5NVD0|PRP4_PONAB	PRPF4	U4/U6 small nuclear ribonucleoprotein Prp4 OS=Pongo abelii GN=PRPF4 PE=2 SV=1	50.6	2.3e-64
TRINITY_DN14485_c2_g1	sp|P97789|XRN1_MOUSE	Xrn1	5'-3' exoribonuclease 1 OS=Mus musculus GN=Xrn1 PE=1 SV=1	35.2	1.5e-31
TRINITY_DN14485_c3_g1	sp|Q3ZCV2|LEXM_HUMAN	LEXM	Lymphocyte expansion molecule OS=Homo sapiens GN=LEXM PE=2 SV=3	32.3	2.6e-41
TRINITY_DN14487_c2_g1	sp|Q8UVX0|PIWL1_DANRE	piwil1	Piwi-like protein 1 OS=Danio rerio GN=piwil1 PE=1 SV=1	53.4	1.8e-243
TRINITY_DN14488_c0_g3	sp|Q9UMX1|SUFU_HUMAN	SUFU	Suppressor of fused homolog OS=Homo sapiens GN=SUFU PE=1 SV=2	64.6	6.9e-83
TRINITY_DN14489_c1_g1	sp|Q8BGG7|UBS3B_MOUSE	Ubash3b	Ubiquitin-associated and SH3 domain-containing protein B OS=Mus musculus GN=Ubash3b PE=1 SV=1	39.6	1e-134
TRINITY_DN14489_c1_g2	sp|Q94613|RS19_MYAAR	RPS19	40S ribosomal protein S19 OS=Mya arenaria GN=RPS19 PE=2 SV=1	61.8	1.4e-47
TRINITY_DN14490_c0_g1	sp|O13146|EPHA3_DANRE	epha3	Ephrin type-A receptor 3 OS=Danio rerio GN=epha3 PE=2 SV=1	43.2	3.2e-28
TRINITY_DN14490_c0_g6	sp|A7T167|GDAP2_NEMVE	gdap2	Protein GDAP2 homolog OS=Nematostella vectensis GN=gdap2 PE=3 SV=1	46.6	1.2e-46
TRINITY_DN14492_c0_g4	sp|A0NGI1|TM234_ANOGA	AGAP012180	Transmembrane protein 234 homolog OS=Anopheles gambiae GN=AGAP012180 PE=3 SV=1	46.8	3e-16
TRINITY_DN14492_c1_g1	sp|Q5W269|PIGC_SERS3	pigC	Prodigiosin synthesizing transferase PigC OS=Serratia sp. (strain ATCC 39006) GN=pigC PE=1 SV=1	28.4	1.6e-36
TRINITY_DN14494_c2_g2	sp|Q67ZE1|HSDD2_ARATH	3BETAHSD/D2	3beta-hydroxysteroid-dehydrogenase/decarboxylase isoform 2 OS=Arabidopsis thaliana GN=3BETAHSD/D2 PE=2 SV=2	30.3	4.6e-26
TRINITY_DN14494_c2_g3	sp|P84227|H32_BOVIN	-	Histone H3.2 OS=Bos taurus PE=1 SV=2	98.5	5.5e-66
TRINITY_DN14494_c2_g7	sp|Q9FX01|HSDD1_ARATH	3BETAHSD/D1	3beta-hydroxysteroid-dehydrogenase/decarboxylase isoform 1 OS=Arabidopsis thaliana GN=3BETAHSD/D1 PE=2 SV=1	33.1	1.4e-28
TRINITY_DN14494_c3_g3	sp|Q5ZKT8|RM15_CHICK	MRPL15	39S ribosomal protein L15, mitochondrial OS=Gallus gallus GN=MRPL15 PE=2 SV=1	46	3.4e-43
TRINITY_DN14494_c3_g5	sp|Q5RJ20|AP2D_DANRE	tfap2d	Transcription factor AP-2-delta OS=Danio rerio GN=tfap2d PE=2 SV=1	61.3	3.2e-44
TRINITY_DN14495_c0_g2	sp|A3KNI7|CCDB1_DANRE	ccndbp1	Cyclin-D1-binding protein 1 homolog OS=Danio rerio GN=ccndbp1 PE=2 SV=2	30	3.2e-29
TRINITY_DN14496_c0_g1	sp|Q95142|PDE6D_BOVIN	PDE6D	Retinal rod rhodopsin-sensitive cGMP 3',5'-cyclic phosphodiesterase subunit delta OS=Bos taurus GN=PDE6D PE=1 SV=1	76.5	2.2e-63
TRINITY_DN14496_c0_g2	sp|P14550|AK1A1_HUMAN	AKR1A1	Alcohol dehydrogenase [NADP(+)] OS=Homo sapiens GN=AKR1A1 PE=1 SV=3	56.7	1.2e-110
TRINITY_DN14496_c0_g3	sp|P13667|PDIA4_HUMAN	PDIA4	Protein disulfide-isomerase A4 OS=Homo sapiens GN=PDIA4 PE=1 SV=2	36	3.5e-91
TRINITY_DN14496_c1_g1	sp|P82251|BAT1_HUMAN	SLC7A9	b(0,+)-type amino acid transporter 1 OS=Homo sapiens GN=SLC7A9 PE=1 SV=1	37.3	4.7e-50
TRINITY_DN14497_c0_g1	sp|P29692|EF1D_HUMAN	EEF1D	Elongation factor 1-delta OS=Homo sapiens GN=EEF1D PE=1 SV=5	75	2.8e-35
TRINITY_DN14497_c1_g2	sp|P53990|IST1_HUMAN	IST1	IST1 homolog OS=Homo sapiens GN=IST1 PE=1 SV=1	35.4	3.2e-36
TRINITY_DN14497_c2_g3	sp|P12617|DCMC_ANSAN	MLYCD	Malonyl-CoA decarboxylase, mitochondrial OS=Anser anser anser GN=MLYCD PE=1 SV=2	43.2	1e-88
TRINITY_DN14497_c2_g9	sp|O43396|TXNL1_HUMAN	TXNL1	Thioredoxin-like protein 1 OS=Homo sapiens GN=TXNL1 PE=1 SV=3	44	1.8e-67
TRINITY_DN14500_c0_g1	sp|Q6INN8|SAMH1_XENLA	samhd1	Deoxynucleoside triphosphate triphosphohydrolase SAMHD1 OS=Xenopus laevis GN=samhd1 PE=2 SV=2	60.6	6.8e-39
TRINITY_DN14501_c0_g1	sp|D3ZEN0|MILK2_RAT	Micall2	MICAL-like protein 2 OS=Rattus norvegicus GN=Micall2 PE=1 SV=2	45.5	2e-18
TRINITY_DN14501_c0_g3	sp|Q96AJ9|VTI1A_HUMAN	VTI1A	Vesicle transport through interaction with t-SNAREs homolog 1A OS=Homo sapiens GN=VTI1A PE=1 SV=2	45	1.2e-32
TRINITY_DN14501_c0_g8	sp|Q7L9L4|MOB1B_HUMAN	MOB1B	MOB kinase activator 1B OS=Homo sapiens GN=MOB1B PE=1 SV=3	81.8	1.8e-99
TRINITY_DN14505_c3_g1	sp|Q6DFF6|KLH20_XENLA	klhl20	Kelch-like protein 20 OS=Xenopus laevis GN=klhl20 PE=2 SV=1	39.4	1.2e-61
TRINITY_DN14505_c5_g2	sp|Q56V19|MBNL3_TAKRU	mbnl3	Muscleblind-like protein 3 OS=Takifugu rubripes GN=mbnl3 PE=2 SV=1	34.1	6.2e-15
TRINITY_DN14508_c0_g6	sp|Q9WVK8|CP46A_MOUSE	Cyp46a1	Cholesterol 24-hydroxylase OS=Mus musculus GN=Cyp46a1 PE=1 SV=1	36.8	7e-82
TRINITY_DN14509_c2_g1	sp|P52294|IMA5_HUMAN	KPNA1	Importin subunit alpha-5 OS=Homo sapiens GN=KPNA1 PE=1 SV=3	52	1.9e-13
TRINITY_DN14509_c2_g3	sp|P52170|IMA5_XENLA	kpna1	Importin subunit alpha-5 OS=Xenopus laevis GN=kpna1 PE=1 SV=2	42.8	8.7e-41
TRINITY_DN14509_c5_g1	sp|O95251|KAT7_HUMAN	KAT7	Histone acetyltransferase KAT7 OS=Homo sapiens GN=KAT7 PE=1 SV=1	46.6	5.3e-113
TRINITY_DN14510_c0_g1	sp|C5PCB1|SUB4A_COCP7	CPC735_066880	Subtilisin-like protease CPC735_066880 OS=Coccidioides posadasii (strain C735) GN=CPC735_066880 PE=3 SV=1	35.7	1.5e-54
TRINITY_DN14512_c0_g1	sp|P55197|AF10_HUMAN	MLLT10	Protein AF-10 OS=Homo sapiens GN=MLLT10 PE=1 SV=2	61.6	6.1e-69
TRINITY_DN14512_c0_g2	sp|Q8IUH3|RBM45_HUMAN	RBM45	RNA-binding protein 45 OS=Homo sapiens GN=RBM45 PE=1 SV=1	35.5	2.9e-76
TRINITY_DN14514_c0_g1	sp|Q5WR10|DX39B_CANLF	DDX39B	Spliceosome RNA helicase DDX39B OS=Canis lupus familiaris GN=DDX39B PE=3 SV=1	54.2	7.3e-180
TRINITY_DN14514_c0_g3	sp|Q0P6D6|CCD15_HUMAN	CCDC15	Coiled-coil domain-containing protein 15 OS=Homo sapiens GN=CCDC15 PE=2 SV=2	47.4	2.5e-14
TRINITY_DN14514_c0_g9	sp|Q6ZPU9|KBP_MOUSE	Kif1bp	KIF1-binding protein OS=Mus musculus GN=Kif1bp PE=1 SV=2	37.5	2.5e-07
TRINITY_DN14516_c0_g1	sp|P25183|RCC1_XENLA	rcc1	Regulator of chromosome condensation OS=Xenopus laevis GN=rcc1 PE=2 SV=1	46.2	6.8e-45
TRINITY_DN14516_c0_g2	sp|P18754|RCC1_HUMAN	RCC1	Regulator of chromosome condensation OS=Homo sapiens GN=RCC1 PE=1 SV=1	52.6	1.2e-30
TRINITY_DN14516_c0_g3	sp|P15121|ALDR_HUMAN	AKR1B1	Aldose reductase OS=Homo sapiens GN=AKR1B1 PE=1 SV=3	51.2	4.5e-29
TRINITY_DN14516_c0_g6	sp|P25183|RCC1_XENLA	rcc1	Regulator of chromosome condensation OS=Xenopus laevis GN=rcc1 PE=2 SV=1	53.1	2.2e-06
TRINITY_DN14517_c0_g4	sp|Q3SZI7|COG6_BOVIN	COG6	Conserved oligomeric Golgi complex subunit 6 OS=Bos taurus GN=COG6 PE=2 SV=1	36.3	8.5e-58
TRINITY_DN14517_c0_g6	sp|Q3SZI7|COG6_BOVIN	COG6	Conserved oligomeric Golgi complex subunit 6 OS=Bos taurus GN=COG6 PE=2 SV=1	50.9	2.5e-23
TRINITY_DN14519_c0_g5	sp|Q9R279|CLCN3_CAVPO	CLCN3	H(+)/Cl(-) exchange transporter 3 OS=Cavia porcellus GN=CLCN3 PE=2 SV=1	51.8	1.4e-214
TRINITY_DN14522_c1_g1	sp|O94929|ABLM3_HUMAN	ABLIM3	Actin-binding LIM protein 3 OS=Homo sapiens GN=ABLIM3 PE=1 SV=3	52.4	8.8e-07
TRINITY_DN14522_c1_g2	sp|Q8K4G5|ABLM1_MOUSE	Ablim1	Actin-binding LIM protein 1 OS=Mus musculus GN=Ablim1 PE=1 SV=1	47.8	2.2e-30
TRINITY_DN14523_c0_g1	sp|O95786|DDX58_HUMAN	DDX58	Probable ATP-dependent RNA helicase DDX58 OS=Homo sapiens GN=DDX58 PE=1 SV=2	32	1e-59
TRINITY_DN14524_c1_g1	sp|Q8BTY8|SCFD2_MOUSE	Scfd2	Sec1 family domain-containing protein 2 OS=Mus musculus GN=Scfd2 PE=1 SV=1	31.6	2e-39
TRINITY_DN14524_c1_g10	sp|Q4R381|EZH2_MACFA	EZH2	Histone-lysine N-methyltransferase EZH2 OS=Macaca fascicularis GN=EZH2 PE=2 SV=1	44.1	1.4e-41
TRINITY_DN14524_c1_g3	sp|Q96P50|ACAP3_HUMAN	ACAP3	Arf-GAP with coiled-coil, ANK repeat and PH domain-containing protein 3 OS=Homo sapiens GN=ACAP3 PE=1 SV=2	55.7	3.4e-24
TRINITY_DN14524_c1_g8	sp|A7E2Z2|EZH1_BOVIN	EZH1	Histone-lysine N-methyltransferase EZH1 OS=Bos taurus GN=EZH1 PE=2 SV=2	57.9	1.2e-106
TRINITY_DN14526_c7_g1	sp|Q32L63|VTA1_BOVIN	VTA1	Vacuolar protein sorting-associated protein VTA1 homolog OS=Bos taurus GN=VTA1 PE=2 SV=1	35.2	9.2e-42
TRINITY_DN14528_c0_g1	sp|Q61598|GDIB_MOUSE	Gdi2	Rab GDP dissociation inhibitor beta OS=Mus musculus GN=Gdi2 PE=1 SV=1	47.8	2.1e-100
TRINITY_DN14529_c0_g1	sp|Q14BN4|SLMAP_HUMAN	SLMAP	Sarcolemmal membrane-associated protein OS=Homo sapiens GN=SLMAP PE=1 SV=1	44.1	2.7e-55
TRINITY_DN14530_c3_g2	sp|Q28IU1|DHB12_XENTR	hsd17b12	Very-long-chain 3-oxoacyl-CoA reductase OS=Xenopus tropicalis GN=hsd17b12 PE=2 SV=1	36.1	2.5e-32
TRINITY_DN14533_c0_g2	sp|O60942|MCE1_HUMAN	RNGTT	mRNA-capping enzyme OS=Homo sapiens GN=RNGTT PE=1 SV=1	48.8	2.5e-22
TRINITY_DN14533_c0_g9	sp|Q1JPH6|IF4H_BOVIN	EIF4H	Eukaryotic translation initiation factor 4H OS=Bos taurus GN=EIF4H PE=2 SV=1	63.9	7.1e-26
TRINITY_DN14533_c1_g1	sp|Q9TZM3|LRK1_CAEEL	lrk-1	Leucine-rich repeat serine/threonine-protein kinase 1 OS=Caenorhabditis elegans GN=lrk-1 PE=1 SV=6	22.9	3.2e-35
TRINITY_DN14535_c2_g2	sp|P18907|AT1A1_HORSE	ATP1A1	Sodium/potassium-transporting ATPase subunit alpha-1 OS=Equus caballus GN=ATP1A1 PE=3 SV=1	61.8	9.9e-54
TRINITY_DN14536_c1_g6	sp|P83876|TXN4A_HUMAN	TXNL4A	Thioredoxin-like protein 4A OS=Homo sapiens GN=TXNL4A PE=1 SV=1	90.1	5.2e-77
TRINITY_DN14537_c1_g5	sp|Q9BUQ8|DDX23_HUMAN	DDX23	Probable ATP-dependent RNA helicase DDX23 OS=Homo sapiens GN=DDX23 PE=1 SV=3	71.8	4.1e-246
TRINITY_DN14537_c1_g7	sp|Q10471|GALT2_HUMAN	GALNT2	Polypeptide N-acetylgalactosaminyltransferase 2 OS=Homo sapiens GN=GALNT2 PE=1 SV=1	53.5	8.6e-149
TRINITY_DN14538_c0_g1	sp|Q8I7P9|POL5_DROME	pol	Retrovirus-related Pol polyprotein from transposon opus OS=Drosophila melanogaster GN=pol PE=3 SV=1	33.3	2.4e-20
TRINITY_DN14539_c1_g1	sp|Q8NCE2|MTMRE_HUMAN	MTMR14	Myotubularin-related protein 14 OS=Homo sapiens GN=MTMR14 PE=1 SV=2	47.5	4.4e-98
TRINITY_DN14542_c1_g1	sp|Q8NFG4|FLCN_HUMAN	FLCN	Folliculin OS=Homo sapiens GN=FLCN PE=1 SV=1	36.8	6.1e-89
TRINITY_DN14542_c1_g2	sp|Q8C5N3|CWC22_MOUSE	Cwc22	Pre-mRNA-splicing factor CWC22 homolog OS=Mus musculus GN=Cwc22 PE=1 SV=1	70.5	4.3e-181
TRINITY_DN14542_c1_g7	sp|Q5ZKA3|CWC22_CHICK	CWC22	Pre-mRNA-splicing factor CWC22 homolog OS=Gallus gallus GN=CWC22 PE=2 SV=2	89.1	3e-18
TRINITY_DN14543_c0_g1	sp|Q9NR09|BIRC6_HUMAN	BIRC6	Baculoviral IAP repeat-containing protein 6 OS=Homo sapiens GN=BIRC6 PE=1 SV=2	53.2	4.5e-30
TRINITY_DN14544_c1_g1	sp|Q9JKC9|SYNRG_RAT	Synrg	Synergin gamma OS=Rattus norvegicus GN=Synrg PE=1 SV=3	39.1	1.8e-11
TRINITY_DN14544_c2_g3	sp|Q5FWL3|RNF41_XENLA	rnf41	E3 ubiquitin-protein ligase NRDP1 OS=Xenopus laevis GN=rnf41 PE=2 SV=1	47.4	9.8e-91
TRINITY_DN14544_c2_g7	sp|Q8IXL7|MSRB3_HUMAN	MSRB3	Methionine-R-sulfoxide reductase B3 OS=Homo sapiens GN=MSRB3 PE=1 SV=2	61.9	2.1e-39
TRINITY_DN14546_c2_g2	sp|P42893|ECE1_RAT	Ece1	Endothelin-converting enzyme 1 OS=Rattus norvegicus GN=Ece1 PE=1 SV=2	29.8	1.2e-90
TRINITY_DN14549_c1_g1	sp|Q8NEL9|DDHD1_HUMAN	DDHD1	Phospholipase DDHD1 OS=Homo sapiens GN=DDHD1 PE=1 SV=2	32.4	6.3e-50
TRINITY_DN14550_c2_g2	sp|Q2HJH2|RAB1B_BOVIN	RAB1B	Ras-related protein Rab-1B OS=Bos taurus GN=RAB1B PE=2 SV=1	78.1	2.8e-56
TRINITY_DN14550_c2_g4	sp|Q12996|CSTF3_HUMAN	CSTF3	Cleavage stimulation factor subunit 3 OS=Homo sapiens GN=CSTF3 PE=1 SV=1	51.6	1.9e-210
TRINITY_DN14553_c0_g1	sp|Q9SN35|RAA1D_ARATH	RABA1D	Ras-related protein RABA1d OS=Arabidopsis thaliana GN=RABA1D PE=2 SV=1	48	1.1e-47
TRINITY_DN14555_c0_g1	sp|Q86UL8|MAGI2_HUMAN	MAGI2	Membrane-associated guanylate kinase, WW and PDZ domain-containing protein 2 OS=Homo sapiens GN=MAGI2 PE=1 SV=3	32.7	9.7e-08
TRINITY_DN14557_c1_g3	sp|P61211|ARL1_MOUSE	Arl1	ADP-ribosylation factor-like protein 1 OS=Mus musculus GN=Arl1 PE=1 SV=1	61.3	7.1e-14
TRINITY_DN14557_c2_g3	sp|Q92541|RTF1_HUMAN	RTF1	RNA polymerase-associated protein RTF1 homolog OS=Homo sapiens GN=RTF1 PE=1 SV=4	54.2	9.5e-73
TRINITY_DN14558_c1_g2	sp|Q80ZX8|SPAG1_MOUSE	Spag1	Sperm-associated antigen 1 OS=Mus musculus GN=Spag1 PE=1 SV=1	35.2	2.9e-48
TRINITY_DN14559_c0_g1	sp|Q14108|SCRB2_HUMAN	SCARB2	Lysosome membrane protein 2 OS=Homo sapiens GN=SCARB2 PE=1 SV=2	30.9	7.6e-50
TRINITY_DN14559_c0_g3	sp|Q6DHC3|S2540_DANRE	slc25a40	Solute carrier family 25 member 40 OS=Danio rerio GN=slc25a40 PE=2 SV=1	44.7	2.5e-70
TRINITY_DN14560_c0_g4	sp|Q9NW15|ANO10_HUMAN	ANO10	Anoctamin-10 OS=Homo sapiens GN=ANO10 PE=1 SV=2	27.2	2.2e-48
TRINITY_DN14561_c0_g1	sp|Q5NDL1|EOGT_PANTR	EOGT	EGF domain-specific O-linked N-acetylglucosamine transferase OS=Pan troglodytes GN=EOGT PE=2 SV=1	51.8	9.8e-127
TRINITY_DN14563_c1_g1	sp|Q9H3S3|TMPS5_HUMAN	TMPRSS5	Transmembrane protease serine 5 OS=Homo sapiens GN=TMPRSS5 PE=1 SV=2	40.1	1.9e-41
TRINITY_DN14563_c2_g1	sp|Q8TC07|TBC15_HUMAN	TBC1D15	TBC1 domain family member 15 OS=Homo sapiens GN=TBC1D15 PE=1 SV=2	33.2	7.2e-23
TRINITY_DN14563_c2_g3	sp|P62822|RAB1A_CANLF	RAB1A	Ras-related protein Rab-1A OS=Canis lupus familiaris GN=RAB1A PE=1 SV=3	44.9	3.5e-38
TRINITY_DN14563_c2_g8	sp|P26932|CNN1_CHICK	CNN1	Calponin-1 OS=Gallus gallus GN=CNN1 PE=1 SV=2	30.1	2.4e-10
TRINITY_DN14565_c3_g1	sp|O22932|CIPKB_ARATH	CIPK11	CBL-interacting serine/threonine-protein kinase 11 OS=Arabidopsis thaliana GN=CIPK11 PE=1 SV=1	25.7	1.7e-28
TRINITY_DN14565_c3_g3	sp|P17609|YPT2_SCHPO	ypt2	GTP-binding protein ypt2 OS=Schizosaccharomyces pombe (strain 972 / ATCC 24843) GN=ypt2 PE=3 SV=1	41.5	2.3e-43
TRINITY_DN14568_c0_g1	sp|Q9BWD1|THIC_HUMAN	ACAT2	Acetyl-CoA acetyltransferase, cytosolic OS=Homo sapiens GN=ACAT2 PE=1 SV=2	64.5	1.1e-66
TRINITY_DN14569_c0_g1	sp|Q8RWR1|JMJ30_ARATH	JMJ30	Lysine-specific demethylase JMJ30 OS=Arabidopsis thaliana GN=JMJ30 PE=1 SV=1	30.3	2.3e-19
TRINITY_DN14570_c0_g1	sp|Q15283|RASA2_HUMAN	RASA2	Ras GTPase-activating protein 2 OS=Homo sapiens GN=RASA2 PE=1 SV=3	36.7	3.4e-44
TRINITY_DN14573_c1_g2	sp|O75521|ECI2_HUMAN	ECI2	Enoyl-CoA delta isomerase 2, mitochondrial OS=Homo sapiens GN=ECI2 PE=1 SV=4	54.3	5.9e-103
TRINITY_DN14574_c3_g2	sp|Q8BQM9|MD12L_MOUSE	Med12l	Mediator of RNA polymerase II transcription subunit 12-like protein OS=Mus musculus GN=Med12l PE=1 SV=2	38.5	5.2e-43
TRINITY_DN14574_c4_g1	sp|Q6ZMN7|PZRN4_HUMAN	PDZRN4	PDZ domain-containing RING finger protein 4 OS=Homo sapiens GN=PDZRN4 PE=2 SV=3	36.7	4.8e-15
TRINITY_DN14574_c4_g3	sp|Q9Z0J0|NPC2_MOUSE	Npc2	Epididymal secretory protein E1 OS=Mus musculus GN=Npc2 PE=1 SV=1	35.4	2.9e-22
TRINITY_DN14574_c4_g4	sp|Q8TBE0|BAHD1_HUMAN	BAHD1	Bromo adjacent homology domain-containing 1 protein OS=Homo sapiens GN=BAHD1 PE=1 SV=2	40.8	2.5e-29
TRINITY_DN14575_c3_g2	sp|Q8K4P8|HECW1_MOUSE	Hecw1	E3 ubiquitin-protein ligase HECW1 OS=Mus musculus GN=Hecw1 PE=1 SV=3	33	1.5e-21
TRINITY_DN14575_c3_g3	sp|A7Z026|PPR37_BOVIN	PPP1R37	Protein phosphatase 1 regulatory subunit 37 OS=Bos taurus GN=PPP1R37 PE=2 SV=1	44.4	1.1e-07
TRINITY_DN14576_c1_g1	sp|Q26626|KIFA3_STRPU	KAP115	Kinesin-associated protein 3 OS=Strongylocentrotus purpuratus GN=KAP115 PE=1 SV=1	53.7	1.1e-115
TRINITY_DN14577_c0_g10	sp|Q7ZVZ7|AB17C_DANRE	abhd17c	Protein ABHD17C OS=Danio rerio GN=abhd17c PE=2 SV=1	64.5	1.2e-81
TRINITY_DN14577_c0_g3	sp|P62490|RB11A_CANLF	RAB11A	Ras-related protein Rab-11A OS=Canis lupus familiaris GN=RAB11A PE=2 SV=3	79.1	6.1e-51
TRINITY_DN14577_c0_g4	sp|Q8VBV4|FBXW7_MOUSE	Fbxw7	F-box/WD repeat-containing protein 7 OS=Mus musculus GN=Fbxw7 PE=1 SV=1	52.1	6.6e-57
TRINITY_DN14578_c0_g1	sp|P19706|MYSB_ACACA	MIB	Myosin heavy chain IB OS=Acanthamoeba castellanii GN=MIB PE=1 SV=2	46.2	3.6e-07
TRINITY_DN14578_c1_g1	sp|Q6TJY3|KS6B1_BOVIN	RPS6KB1	Ribosomal protein S6 kinase beta-1 OS=Bos taurus GN=RPS6KB1 PE=2 SV=1	59.7	3.1e-126
TRINITY_DN14578_c1_g3	sp|Q7Z7E8|UB2Q1_HUMAN	UBE2Q1	Ubiquitin-conjugating enzyme E2 Q1 OS=Homo sapiens GN=UBE2Q1 PE=1 SV=1	45.2	9.4e-82
TRINITY_DN14578_c1_g5	sp|P09958|FURIN_HUMAN	FURIN	Furin OS=Homo sapiens GN=FURIN PE=1 SV=2	45.4	3.6e-164
TRINITY_DN14583_c1_g1	sp|Q5ZMP6|AP2M1_CHICK	AP2M1	AP-2 complex subunit mu OS=Gallus gallus GN=AP2M1 PE=2 SV=1	73.8	1.4e-190
TRINITY_DN14583_c1_g6	sp|Q5GIS3|GBB_PINFU	-	Guanine nucleotide-binding protein subunit beta OS=Pinctada fucata PE=1 SV=1	84.3	1.7e-112
TRINITY_DN14585_c3_g2	sp|Q7ZW86|CWC27_DANRE	cwc27	Peptidyl-prolyl cis-trans isomerase CWC27 homolog OS=Danio rerio GN=cwc27 PE=2 SV=1	77	1.3e-29
TRINITY_DN14585_c3_g3	sp|Q62623|CDC20_RAT	Cdc20	Cell division cycle protein 20 homolog OS=Rattus norvegicus GN=Cdc20 PE=1 SV=2	45.8	8.5e-107
TRINITY_DN14586_c1_g1	sp|Q9Z175|LOXL3_MOUSE	Loxl3	Lysyl oxidase homolog 3 OS=Mus musculus GN=Loxl3 PE=2 SV=2	50.5	1e-23
TRINITY_DN14587_c3_g1	sp|P62508|ERR3_HUMAN	ESRRG	Estrogen-related receptor gamma OS=Homo sapiens GN=ESRRG PE=1 SV=1	38.8	5.1e-14
TRINITY_DN14589_c0_g2	sp|Q9NWM8|FKB14_HUMAN	FKBP14	Peptidyl-prolyl cis-trans isomerase FKBP14 OS=Homo sapiens GN=FKBP14 PE=1 SV=1	41.1	7.3e-17
TRINITY_DN14591_c0_g1	sp|Q5TCS8|KAD9_HUMAN	AK9	Adenylate kinase 9 OS=Homo sapiens GN=AK9 PE=1 SV=2	48.3	2.9e-100
TRINITY_DN14592_c0_g1	sp|Q13490|BIRC2_HUMAN	BIRC2	Baculoviral IAP repeat-containing protein 2 OS=Homo sapiens GN=BIRC2 PE=1 SV=2	27.4	4.1e-24
TRINITY_DN14593_c3_g4	sp|Q91W90|TXND5_MOUSE	Txndc5	Thioredoxin domain-containing protein 5 OS=Mus musculus GN=Txndc5 PE=1 SV=2	40.7	7.8e-69
TRINITY_DN14597_c4_g1	sp|Q13356|PPIL2_HUMAN	PPIL2	Peptidyl-prolyl cis-trans isomerase-like 2 OS=Homo sapiens GN=PPIL2 PE=1 SV=1	64.1	1.4e-83
TRINITY_DN14600_c3_g1	sp|Q24799|MYPH_ECHGR	-	Myophilin OS=Echinococcus granulosus PE=2 SV=1	48.3	4.2e-36
TRINITY_DN14600_c3_g5	sp|Q5R7U7|DCTN4_PONAB	DCTN4	Dynactin subunit 4 OS=Pongo abelii GN=DCTN4 PE=2 SV=1	32.2	2.1e-56
TRINITY_DN14601_c0_g1	sp|Q9P2S6|ANKY1_HUMAN	ANKMY1	Ankyrin repeat and MYND domain-containing protein 1 OS=Homo sapiens GN=ANKMY1 PE=2 SV=2	36.9	7.4e-37
TRINITY_DN14602_c0_g2	sp|Q9VAC5|ADA17_DROME	Tace	ADAM 17-like protease OS=Drosophila melanogaster GN=Tace PE=2 SV=2	31.3	1.2e-28
TRINITY_DN14602_c1_g3	sp|A7Z050|VIP1_BOVIN	PPIP5K1	Inositol hexakisphosphate and diphosphoinositol-pentakisphosphate kinase 1 OS=Bos taurus GN=PPIP5K1 PE=2 SV=1	53.7	2.8e-50
TRINITY_DN14603_c2_g2	sp|F1QH17|MCA3A_DANRE	mical3a	Protein-methionine sulfoxide oxidase mical3a OS=Danio rerio GN=mical3a PE=2 SV=2	50.7	1.2e-138
TRINITY_DN14603_c3_g1	sp|Q5SZV5|K0319_MOUSE	Kiaa0319	Dyslexia-associated protein KIAA0319 homolog OS=Mus musculus GN=Kiaa0319 PE=1 SV=1	31.5	6e-68
TRINITY_DN14606_c0_g1	sp|Q10741|ADA10_BOVIN	ADAM10	Disintegrin and metalloproteinase domain-containing protein 10 OS=Bos taurus GN=ADAM10 PE=1 SV=1	39.6	1.2e-57
TRINITY_DN14608_c4_g1	sp|Q9BZF3|OSBL6_HUMAN	OSBPL6	Oxysterol-binding protein-related protein 6 OS=Homo sapiens GN=OSBPL6 PE=1 SV=1	37.5	1.2e-09
TRINITY_DN14608_c5_g1	sp|A4FV68|2A5E_BOVIN	PPP2R5E	Serine/threonine-protein phosphatase 2A 56 kDa regulatory subunit epsilon isoform OS=Bos taurus GN=PPP2R5E PE=1 SV=1	68.8	2.4e-158
TRINITY_DN14610_c3_g1	sp|P13439|UMPS_MOUSE	Umps	Uridine 5'-monophosphate synthase OS=Mus musculus GN=Umps PE=1 SV=3	50	4.4e-49
TRINITY_DN14610_c3_g2	sp|Q6DHR8|NGBR_DANRE	nus1	Dehydrodolichyl diphosphate synthase complex subunit nus1 OS=Danio rerio GN=nus1 PE=2 SV=1	37.7	8.8e-34
TRINITY_DN14610_c3_g3	sp|P14965|PYRF_SCHPO	ura4	Orotidine 5'-phosphate decarboxylase OS=Schizosaccharomyces pombe (strain 972 / ATCC 24843) GN=ura4 PE=3 SV=1	49.1	8.7e-27
TRINITY_DN14610_c4_g2	sp|Q5R9C5|IDHC_PONAB	IDH1	Isocitrate dehydrogenase [NADP] cytoplasmic OS=Pongo abelii GN=IDH1 PE=2 SV=2	70.5	2.1e-118
TRINITY_DN14611_c0_g1	sp|Q8K284|TF3C1_MOUSE	Gtf3c1	General transcription factor 3C polypeptide 1 OS=Mus musculus GN=Gtf3c1 PE=1 SV=2	27.7	8.6e-09
TRINITY_DN14611_c1_g7	sp|Q5FWR0|SMRCD_XENTR	smarcad1	SWI/SNF-related matrix-associated actin-dependent regulator of chromatin subfamily A containing DEAD/H box 1 OS=Xenopus tropicalis GN=smarcad1 PE=2 SV=1	47.4	2.3e-15
TRINITY_DN14612_c1_g1	sp|Q8R1B4|EIF3C_MOUSE	Eif3c	Eukaryotic translation initiation factor 3 subunit C OS=Mus musculus GN=Eif3c PE=1 SV=1	50.5	1e-164
TRINITY_DN14612_c1_g4	sp|Q6P1V4|EIF3C_XENTR	eif3c	Eukaryotic translation initiation factor 3 subunit C OS=Xenopus tropicalis GN=eif3c PE=2 SV=1	47.2	5.4e-15
TRINITY_DN14614_c0_g1	sp|Q5ZKY0|TM175_CHICK	TMEM175	Endosomal/lysomomal potassium channel TMEM175 OS=Gallus gallus GN=TMEM175 PE=2 SV=2	31.9	4.2e-34
TRINITY_DN14615_c0_g1	sp|Q9P2D7|DYH1_HUMAN	DNAH1	Dynein heavy chain 1, axonemal OS=Homo sapiens GN=DNAH1 PE=2 SV=4	44.6	3.8e-299
TRINITY_DN14619_c0_g1	sp|Q99MD6|TRXR3_MOUSE	Txnrd3	Thioredoxin reductase 3 OS=Mus musculus GN=Txnrd3 PE=1 SV=3	59.2	2.1e-191
TRINITY_DN14619_c0_g6	sp|Q76LV2|HS90A_BOVIN	HSP90AA1	Heat shock protein HSP 90-alpha OS=Bos taurus GN=HSP90AA1 PE=1 SV=3	82.5	2.1e-303
TRINITY_DN14623_c3_g1	sp|Q9H0A0|NAT10_HUMAN	NAT10	RNA cytidine acetyltransferase OS=Homo sapiens GN=NAT10 PE=1 SV=2	65.9	0
TRINITY_DN14623_c4_g1	sp|Q5R733|CPEB1_PONAB	CPEB1	Cytoplasmic polyadenylation element-binding protein 1 OS=Pongo abelii GN=CPEB1 PE=2 SV=1	70.4	5.7e-115
TRINITY_DN14623_c4_g5	sp|Q60870|REEP5_MOUSE	Reep5	Receptor expression-enhancing protein 5 OS=Mus musculus GN=Reep5 PE=1 SV=1	47.8	1.3e-42
TRINITY_DN14624_c0_g2	sp|Q9V9K7|SRRT_DROME	Ars2	Serrate RNA effector molecule homolog OS=Drosophila melanogaster GN=Ars2 PE=1 SV=2	30.6	2.7e-46
TRINITY_DN14625_c3_g2	sp|A7S1L6|FUCT1_NEMVE	slc35c1	GDP-fucose transporter 1 OS=Nematostella vectensis GN=slc35c1 PE=3 SV=1	58.1	1e-101
TRINITY_DN14627_c1_g6	sp|Q6AXV9|GSTO2_RAT	Gsto2	Glutathione S-transferase omega-2 OS=Rattus norvegicus GN=Gsto2 PE=2 SV=1	29.5	9.6e-08
TRINITY_DN14629_c1_g1	sp|Q52KD7|ZNT7A_XENLA	slc30a7-a	Zinc transporter 7-A OS=Xenopus laevis GN=slc30a7-a PE=2 SV=1	62.4	2.5e-58
TRINITY_DN14629_c1_g10	sp|Q3TJZ6|FA98A_MOUSE	Fam98a	Protein FAM98A OS=Mus musculus GN=Fam98a PE=1 SV=1	39.7	3.1e-53
TRINITY_DN14631_c0_g1	sp|B3NE99|PLK4_DROER	SAK	Serine/threonine-protein kinase PLK4 OS=Drosophila erecta GN=SAK PE=3 SV=1	51.7	8.5e-51
TRINITY_DN14631_c0_g10	sp|A9X1D0|SETD3_PAPAN	SETD3	Histone-lysine N-methyltransferase setd3 OS=Papio anubis GN=SETD3 PE=3 SV=1	36.5	7.5e-81
TRINITY_DN14631_c0_g14	sp|Q2NL57|UB10A_XENLA	usp10-a	Ubiquitin carboxyl-terminal hydrolase 10-A OS=Xenopus laevis GN=usp10-a PE=2 SV=1	55.1	4.7e-34
TRINITY_DN14631_c0_g2	sp|Q10139|IMG2_SCHPO	img2	54S ribosomal protein img2, mitochondrial OS=Schizosaccharomyces pombe (strain 972 / ATCC 24843) GN=img2 PE=3 SV=1	41.4	7.6e-12
TRINITY_DN14631_c0_g7	sp|Q6TEM9|MYLIA_DANRE	mylipa	E3 ubiquitin-protein ligase MYLIP-A OS=Danio rerio GN=mylipa PE=1 SV=2	36	3.2e-09
TRINITY_DN14631_c0_g8	sp|A5PJS6|UBP10_BOVIN	USP10	Ubiquitin carboxyl-terminal hydrolase 10 OS=Bos taurus GN=USP10 PE=2 SV=1	41.4	7e-52
TRINITY_DN14635_c3_g4	sp|Q9WV52|PLEK2_MOUSE	Plek2	Pleckstrin-2 OS=Mus musculus GN=Plek2 PE=1 SV=1	31	9.6e-37
TRINITY_DN14636_c0_g1	sp|A7RZW4|DPP3_NEMVE	dpp3	Dipeptidyl peptidase 3 OS=Nematostella vectensis GN=dpp3 PE=3 SV=1	60.8	7.7e-202
TRINITY_DN14637_c3_g3	sp|Q5ZJF4|PRDX6_CHICK	PRDX6	Peroxiredoxin-6 OS=Gallus gallus GN=PRDX6 PE=2 SV=3	65.2	2e-82
TRINITY_DN14638_c0_g4	sp|Q90W95|PTPS_POERE	pts	6-pyruvoyl tetrahydrobiopterin synthase OS=Poecilia reticulata GN=pts PE=2 SV=1	58	1.9e-41
TRINITY_DN14641_c0_g1	sp|Q9W719|HPRT_CHICK	HPRT1	Hypoxanthine-guanine phosphoribosyltransferase OS=Gallus gallus GN=HPRT1 PE=2 SV=1	64.8	6.8e-73
TRINITY_DN14642_c0_g1	sp|O15439|MRP4_HUMAN	ABCC4	Multidrug resistance-associated protein 4 OS=Homo sapiens GN=ABCC4 PE=1 SV=3	42.8	2e-185
TRINITY_DN14644_c0_g3	sp|Q7M760|ZRAN1_MOUSE	Zranb1	Ubiquitin thioesterase Zranb1 OS=Mus musculus GN=Zranb1 PE=2 SV=1	44	6.2e-156
TRINITY_DN14644_c0_g4	sp|A2ARP1|VIP1_MOUSE	Ppip5k1	Inositol hexakisphosphate and diphosphoinositol-pentakisphosphate kinase 1 OS=Mus musculus GN=Ppip5k1 PE=1 SV=1	66.9	3.5e-40
TRINITY_DN14644_c0_g5	sp|P70388|RAD50_MOUSE	Rad50	DNA repair protein RAD50 OS=Mus musculus GN=Rad50 PE=1 SV=1	56	7.7e-79
TRINITY_DN14646_c1_g2	sp|Q32LE5|ASGL1_BOVIN	ASRGL1	Isoaspartyl peptidase/L-asparaginase OS=Bos taurus GN=ASRGL1 PE=2 SV=1	65.4	2.7e-11
TRINITY_DN14646_c4_g2	sp|Q8WUB8|PHF10_HUMAN	PHF10	PHD finger protein 10 OS=Homo sapiens GN=PHF10 PE=1 SV=3	34.4	1.5e-68
TRINITY_DN14646_c4_g6	sp|P31937|3HIDH_HUMAN	HIBADH	3-hydroxyisobutyrate dehydrogenase, mitochondrial OS=Homo sapiens GN=HIBADH PE=1 SV=2	56.1	1.2e-98
TRINITY_DN14647_c0_g1	sp|Q7ZX75|LMBRL_XENLA	lmbr1l	Protein LMBR1L OS=Xenopus laevis GN=lmbr1l PE=2 SV=1	42.8	2.6e-79
TRINITY_DN14647_c1_g1	sp|Q60HG7|CGL_MACFA	CTH	Cystathionine gamma-lyase OS=Macaca fascicularis GN=CTH PE=2 SV=1	59.4	1.7e-135
TRINITY_DN14648_c2_g1	sp|A2A8L5|PTPRF_MOUSE	Ptprf	Receptor-type tyrosine-protein phosphatase F OS=Mus musculus GN=Ptprf PE=1 SV=1	30.3	1.8e-10
TRINITY_DN14650_c1_g1	sp|O46680|TGFR1_BOVIN	TGFBR1	TGF-beta receptor type-1 OS=Bos taurus GN=TGFBR1 PE=2 SV=1	55.2	4.8e-103
TRINITY_DN14650_c1_g2	sp|P45478|PPT1_BOVIN	PPT1	Palmitoyl-protein thioesterase 1 OS=Bos taurus GN=PPT1 PE=1 SV=1	45.3	3.8e-28
TRINITY_DN14653_c2_g1	sp|P59997|KDM2A_MOUSE	Kdm2a	Lysine-specific demethylase 2A OS=Mus musculus GN=Kdm2a PE=1 SV=2	36.4	2.3e-64
TRINITY_DN14653_c2_g2	sp|P21281|VATB2_HUMAN	ATP6V1B2	V-type proton ATPase subunit B, brain isoform OS=Homo sapiens GN=ATP6V1B2 PE=1 SV=3	92.6	1.8e-126
TRINITY_DN14654_c2_g1	sp|Q62925|M3K1_RAT	Map3k1	Mitogen-activated protein kinase kinase kinase 1 OS=Rattus norvegicus GN=Map3k1 PE=1 SV=1	26.7	4.4e-22
TRINITY_DN14654_c2_g2	sp|P32876|AT5G1_BOVIN	ATP5G1	ATP synthase F(0) complex subunit C1, mitochondrial OS=Bos taurus GN=ATP5G1 PE=1 SV=1	77.4	3.5e-28
TRINITY_DN14655_c2_g1	sp|Q9UKV8|AGO2_HUMAN	AGO2	Protein argonaute-2 OS=Homo sapiens GN=AGO2 PE=1 SV=3	72	2.1e-189
TRINITY_DN14657_c0_g1	sp|Q2VPA6|HELQ_MOUSE	Helq	Helicase POLQ-like OS=Mus musculus GN=Helq PE=1 SV=2	40.1	7.5e-112
TRINITY_DN14660_c1_g4	sp|O88425|NDK6_MOUSE	Nme6	Nucleoside diphosphate kinase 6 OS=Mus musculus GN=Nme6 PE=1 SV=1	50.9	5.2e-42
TRINITY_DN14660_c1_g5	sp|Q5NA18|MTP5_ORYSJ	MTP5	Metal tolerance protein 5 OS=Oryza sativa subsp. japonica GN=MTP5 PE=2 SV=1	44.5	1.2e-43
TRINITY_DN14660_c1_g7	sp|P59910|DJB13_HUMAN	DNAJB13	DnaJ homolog subfamily B member 13 OS=Homo sapiens GN=DNAJB13 PE=1 SV=1	55.4	7.1e-82
TRINITY_DN14661_c1_g1	sp|Q11136|PEPD_MOUSE	Pepd	Xaa-Pro dipeptidase OS=Mus musculus GN=Pepd PE=1 SV=3	67.4	1.9e-122
TRINITY_DN14661_c1_g3	sp|Q5I0D7|PEPD_RAT	Pepd	Xaa-Pro dipeptidase OS=Rattus norvegicus GN=Pepd PE=2 SV=1	76.3	1.3e-11
TRINITY_DN14662_c0_g1	sp|Q9ET26|RN114_MOUSE	Rnf114	E3 ubiquitin-protein ligase RNF114 OS=Mus musculus GN=Rnf114 PE=1 SV=2	31.6	4.2e-22
TRINITY_DN14663_c2_g1	sp|O14980|XPO1_HUMAN	XPO1	Exportin-1 OS=Homo sapiens GN=XPO1 PE=1 SV=1	70.5	0
TRINITY_DN14663_c2_g5	sp|Q5SP67|WDR26_DANRE	wdr26	WD repeat-containing protein 26 OS=Danio rerio GN=wdr26 PE=1 SV=1	48.6	5.4e-153
TRINITY_DN14664_c2_g2	sp|Q99J27|ACATN_MOUSE	Slc33a1	Acetyl-coenzyme A transporter 1 OS=Mus musculus GN=Slc33a1 PE=1 SV=1	61.2	6.9e-144
TRINITY_DN14666_c0_g1	sp|Q9NPG3|UBN1_HUMAN	UBN1	Ubinuclein-1 OS=Homo sapiens GN=UBN1 PE=1 SV=2	28.1	1.9e-45
TRINITY_DN14666_c0_g4	sp|P49596|PP2C2_CAEEL	ppm-2	Probable protein phosphatase 2C T23F11.1 OS=Caenorhabditis elegans GN=ppm-2 PE=3 SV=2	57.3	8.4e-37
TRINITY_DN14667_c0_g1	sp|Q3KR37|GRM1B_HUMAN	GRAMD1B	GRAM domain-containing protein 1B OS=Homo sapiens GN=GRAMD1B PE=1 SV=1	47.6	9.8e-22
TRINITY_DN14667_c2_g1	sp|P18687|CH60_CRIGR	HSPD1	60 kDa heat shock protein, mitochondrial OS=Cricetulus griseus GN=HSPD1 PE=2 SV=1	68.8	1.7e-212
TRINITY_DN14673_c0_g1	sp|Q54TH6|Y9863_DICDI	DDB_G0281745	Probable serine/threonine-protein kinase DDB_G0281745 OS=Dictyostelium discoideum GN=DDB_G0281745 PE=3 SV=1	30.5	1.6e-30
TRINITY_DN14679_c1_g1	sp|Q28DB3|MAD3_XENTR	mxd3	Max dimerization protein 3 OS=Xenopus tropicalis GN=mxd3 PE=2 SV=1	35.3	1.4e-08
TRINITY_DN14679_c2_g4	sp|B3EWP4|DEF2_ARAHY	-	Defensin 2 (Fragment) OS=Arachis hypogaea PE=1 SV=1	96.2	1.3e-42
TRINITY_DN14681_c0_g1	sp|Q2TBI1|NSE4A_BOVIN	NSMCE4A	Non-structural maintenance of chromosomes element 4 homolog A OS=Bos taurus GN=NSMCE4A PE=2 SV=1	30.3	1e-24
TRINITY_DN14681_c0_g2	sp|Q9USM5|UBP1_SCHPO	ubp1	Probable ubiquitin carboxyl-terminal hydrolase 1 OS=Schizosaccharomyces pombe (strain 972 / ATCC 24843) GN=ubp1 PE=3 SV=1	28.2	2.9e-19
TRINITY_DN14685_c0_g1	sp|Q63772|GAS6_RAT	Gas6	Growth arrest-specific protein 6 OS=Rattus norvegicus GN=Gas6 PE=1 SV=1	57.5	2.6e-06
TRINITY_DN14688_c0_g2	sp|Q8CEE0|CEP57_MOUSE	Cep57	Centrosomal protein of 57 kDa OS=Mus musculus GN=Cep57 PE=1 SV=2	32.9	2.2e-13
TRINITY_DN14689_c0_g1	sp|Q2TBW5|ZNHI2_BOVIN	ZNHIT2	Zinc finger HIT domain-containing protein 2 OS=Bos taurus GN=ZNHIT2 PE=2 SV=1	35.7	6.9e-13
TRINITY_DN14692_c0_g1	sp|Q8JZV7|NAGA_MOUSE	Amdhd2	N-acetylglucosamine-6-phosphate deacetylase OS=Mus musculus GN=Amdhd2 PE=1 SV=1	52.1	4e-114
TRINITY_DN14693_c1_g2	sp|Q8IUR5|TMTC1_HUMAN	TMTC1	Transmembrane and TPR repeat-containing protein 1 OS=Homo sapiens GN=TMTC1 PE=1 SV=3	32.4	1.2e-17
TRINITY_DN14693_c1_g3	sp|Q3T0Q3|RPB3_BOVIN	POLR2C	DNA-directed RNA polymerase II subunit RPB3 OS=Bos taurus GN=POLR2C PE=1 SV=1	65.3	4.6e-71
TRINITY_DN14693_c3_g1	sp|P49915|GUAA_HUMAN	GMPS	GMP synthase [glutamine-hydrolyzing] OS=Homo sapiens GN=GMPS PE=1 SV=1	56.2	6.3e-217
TRINITY_DN14694_c0_g1	sp|Q5R9K4|VMP1_PONAB	VMP1	Vacuole membrane protein 1 OS=Pongo abelii GN=VMP1 PE=2 SV=1	59.8	6.3e-118
TRINITY_DN14694_c1_g3	sp|Q9Y2I9|TBC30_HUMAN	TBC1D30	TBC1 domain family member 30 OS=Homo sapiens GN=TBC1D30 PE=1 SV=2	36.7	7.4e-72
TRINITY_DN14694_c1_g4	sp|P53007|TXTP_HUMAN	SLC25A1	Tricarboxylate transport protein, mitochondrial OS=Homo sapiens GN=SLC25A1 PE=1 SV=2	69.3	2.8e-119
TRINITY_DN14695_c2_g1	sp|P41154|HSF_XENLA	hsf1	Heat shock factor protein OS=Xenopus laevis GN=hsf1 PE=2 SV=1	38.9	1e-37
TRINITY_DN14697_c4_g1	sp|Q5T4D3|TMTC4_HUMAN	TMTC4	Transmembrane and TPR repeat-containing protein 4 OS=Homo sapiens GN=TMTC4 PE=2 SV=2	48.5	2.7e-116
TRINITY_DN14697_c5_g1	sp|Q9DBG7|SRPRA_MOUSE	Srpra	Signal recognition particle receptor subunit alpha OS=Mus musculus GN=Srpra PE=1 SV=1	49	7.2e-33
TRINITY_DN14697_c5_g2	sp|Q9U5L1|SRPRA_DROME	Gtp-bp	Signal recognition particle receptor subunit alpha homolog OS=Drosophila melanogaster GN=Gtp-bp PE=1 SV=2	58.5	1.9e-110
TRINITY_DN14701_c2_g6	sp|Q9R0D8|WDR54_MOUSE	Wdr54	WD repeat-containing protein 54 OS=Mus musculus GN=Wdr54 PE=1 SV=1	35.6	2.2e-40
TRINITY_DN14703_c0_g4	sp|Q4VIT5|CALR_CHLAE	CALR	Calreticulin OS=Chlorocebus aethiops GN=CALR PE=2 SV=1	80.6	4.1e-60
TRINITY_DN14705_c0_g3	sp|O60733|PLPL9_HUMAN	PLA2G6	85/88 kDa calcium-independent phospholipase A2 OS=Homo sapiens GN=PLA2G6 PE=1 SV=2	27.7	1.9e-31
TRINITY_DN14705_c0_g4	sp|P60467|SC61B_CANLF	SEC61B	Protein transport protein Sec61 subunit beta OS=Canis lupus familiaris GN=SEC61B PE=1 SV=2	79.1	1.2e-13
TRINITY_DN14706_c1_g1	sp|Q32PE2|MOG1_BOVIN	RANGRF	Ran guanine nucleotide release factor OS=Bos taurus GN=RANGRF PE=2 SV=1	39.8	2.8e-23
TRINITY_DN14706_c1_g2	sp|Q63085|PDE3B_RAT	Pde3b	cGMP-inhibited 3',5'-cyclic phosphodiesterase B OS=Rattus norvegicus GN=Pde3b PE=2 SV=1	48.2	1.6e-88
TRINITY_DN14706_c1_g4	sp|P58340|MLF1_HUMAN	MLF1	Myeloid leukemia factor 1 OS=Homo sapiens GN=MLF1 PE=1 SV=1	44	4.7e-20
TRINITY_DN14706_c1_g5	sp|Q13637|RAB32_HUMAN	RAB32	Ras-related protein Rab-32 OS=Homo sapiens GN=RAB32 PE=1 SV=3	37	5.5e-33
TRINITY_DN14707_c0_g10	sp|Q6TNS2|PK1IP_DANRE	pak1ip1	p21-activated protein kinase-interacting protein 1-like OS=Danio rerio GN=pak1ip1 PE=2 SV=1	38.1	4.4e-60
TRINITY_DN14709_c0_g1	sp|A7MBJ4|PTPRF_BOVIN	PTPRF	Receptor-type tyrosine-protein phosphatase F OS=Bos taurus GN=PTPRF PE=2 SV=1	39.4	1.3e-105
TRINITY_DN14710_c0_g2	sp|Q32KV4|DC2L1_BOVIN	DYNC2LI1	Cytoplasmic dynein 2 light intermediate chain 1 OS=Bos taurus GN=DYNC2LI1 PE=2 SV=1	50	9e-83
TRINITY_DN14715_c3_g1	sp|O54935|XRCC1_CRIGR	XRCC1	DNA repair protein XRCC1 OS=Cricetulus griseus GN=XRCC1 PE=2 SV=1	41.9	1.8e-72
TRINITY_DN14716_c1_g5	sp|O95870|ABHGA_HUMAN	ABHD16A	Protein ABHD16A OS=Homo sapiens GN=ABHD16A PE=1 SV=3	31.7	1.3e-28
TRINITY_DN14717_c3_g1	sp|Q8N573|OXR1_HUMAN	OXR1	Oxidation resistance protein 1 OS=Homo sapiens GN=OXR1 PE=1 SV=2	47.5	8.1e-07
TRINITY_DN14717_c3_g2	sp|Q9CXF4|TBC15_MOUSE	Tbc1d15	TBC1 domain family member 15 OS=Mus musculus GN=Tbc1d15 PE=1 SV=1	35.3	4.6e-17
TRINITY_DN14718_c1_g1	sp|P47812|MK14_XENLA	mapk14	Mitogen-activated protein kinase 14 OS=Xenopus laevis GN=mapk14 PE=2 SV=1	62.8	4.8e-125
TRINITY_DN14718_c1_g5	sp|Q99K67|AASS_MOUSE	Aass	Alpha-aminoadipic semialdehyde synthase, mitochondrial OS=Mus musculus GN=Aass PE=1 SV=1	50.9	1.5e-125
TRINITY_DN14718_c1_g6	sp|Q9UJT0|TBE_HUMAN	TUBE1	Tubulin epsilon chain OS=Homo sapiens GN=TUBE1 PE=2 SV=1	60.7	2.5e-17
TRINITY_DN14727_c0_g2	sp|Q9NRR6|INP5E_HUMAN	INPP5E	72 kDa inositol polyphosphate 5-phosphatase OS=Homo sapiens GN=INPP5E PE=1 SV=2	47.6	1.3e-51
TRINITY_DN14731_c0_g1	sp|Q9DBY8|NVL_MOUSE	Nvl	Nuclear valosin-containing protein-like OS=Mus musculus GN=Nvl PE=1 SV=1	52.5	1.7e-17
TRINITY_DN14732_c1_g1	sp|A8DZE7|D42E1_DANRE	sdr42e1	Short-chain dehydrogenase/reductase family 42E member 1 OS=Danio rerio GN=sdr42e1 PE=2 SV=1	60.1	3.9e-69
TRINITY_DN14734_c1_g1	sp|Q6DJ13|ZN830_XENTR	znf830	Zinc finger protein 830 OS=Xenopus tropicalis GN=znf830 PE=2 SV=1	48.3	4.4e-11
TRINITY_DN14734_c4_g4	sp|Q80TA1|EPT1_MOUSE	Ept1	Ethanolaminephosphotransferase 1 OS=Mus musculus GN=Ept1 PE=2 SV=3	43.9	2e-82
TRINITY_DN14735_c0_g1	sp|Q91ZR4|NEK8_MOUSE	Nek8	Serine/threonine-protein kinase Nek8 OS=Mus musculus GN=Nek8 PE=1 SV=1	53.7	3.3e-63
TRINITY_DN14737_c0_g1	sp|E1BP74|MARF1_BOVIN	MARF1	Meiosis arrest female protein 1 OS=Bos taurus GN=MARF1 PE=3 SV=2	58.7	6.2e-17
TRINITY_DN14737_c0_g14	sp|A7SXZ6|OSGEP_NEMVE	osgep	Probable tRNA N6-adenosine threonylcarbamoyltransferase OS=Nematostella vectensis GN=osgep PE=3 SV=1	79.1	3.9e-158
TRINITY_DN14737_c0_g3	sp|P26270|PSMD7_DROME	Rpn8	26S proteasome non-ATPase regulatory subunit 7 OS=Drosophila melanogaster GN=Rpn8 PE=1 SV=6	68.7	7.1e-113
TRINITY_DN14737_c0_g9	sp|E1BZ85|MARF1_CHICK	MARF1	Meiosis arrest female protein 1 homolog OS=Gallus gallus GN=MARF1 PE=3 SV=1	62.1	1.8e-15
TRINITY_DN14739_c0_g1	sp|P35605|COPB2_BOVIN	COPB2	Coatomer subunit beta' OS=Bos taurus GN=COPB2 PE=1 SV=3	70.1	4.3e-292
TRINITY_DN14739_c0_g5	sp|Q7ZTY6|CG026_DANRE	zgc:56409	Uncharacterized protein C7orf26 homolog OS=Danio rerio GN=zgc:56409 PE=2 SV=2	27.1	2.7e-24
TRINITY_DN14739_c1_g1	sp|Q9D084|CENPS_MOUSE	Apitd1	Centromere protein S OS=Mus musculus GN=Apitd1 PE=2 SV=1	49	8.9e-20
TRINITY_DN14740_c2_g6	sp|Q803U7|EXO1_DANRE	exo1	Exonuclease 1 OS=Danio rerio GN=exo1 PE=2 SV=1	46.9	1.6e-50
TRINITY_DN14744_c1_g2	sp|Q8VDV3|R3GEF_MOUSE	Rab3il1	Guanine nucleotide exchange factor for Rab-3A OS=Mus musculus GN=Rab3il1 PE=1 SV=1	36	8.5e-39
TRINITY_DN14745_c0_g10	sp|Q6DEI8|MIA40_DANRE	chchd4	Mitochondrial intermembrane space import and assembly protein 40 OS=Danio rerio GN=chchd4 PE=2 SV=1	53.9	1.2e-31
TRINITY_DN14747_c0_g2	sp|P10394|POL4_DROME	POL	Retrovirus-related Pol polyprotein from transposon 412 OS=Drosophila melanogaster GN=POL PE=3 SV=1	29.5	9.7e-133
TRINITY_DN14749_c1_g1	sp|Q8R550|SH3K1_MOUSE	Sh3kbp1	SH3 domain-containing kinase-binding protein 1 OS=Mus musculus GN=Sh3kbp1 PE=1 SV=1	44.6	2.7e-09
TRINITY_DN14750_c0_g1	sp|A4FV54|RAB8A_BOVIN	RAB8A	Ras-related protein Rab-8A OS=Bos taurus GN=RAB8A PE=2 SV=1	91.5	1.4e-38
TRINITY_DN14751_c0_g3	sp|Q9CW73|B3GA1_MOUSE	B3gat1	Galactosylgalactosylxylosylprotein 3-beta-glucuronosyltransferase 1 OS=Mus musculus GN=B3gat1 PE=2 SV=3	43.8	8.8e-50
TRINITY_DN14754_c0_g2	sp|Q99315|YG31B_YEAST	TY3B-G	Transposon Ty3-G Gag-Pol polyprotein OS=Saccharomyces cerevisiae (strain ATCC 204508 / S288c) GN=TY3B-G PE=1 SV=3	42.7	2e-30
TRINITY_DN14757_c1_g3	sp|Q99633|PRP18_HUMAN	PRPF18	Pre-mRNA-splicing factor 18 OS=Homo sapiens GN=PRPF18 PE=1 SV=1	56.8	2.4e-94
TRINITY_DN14760_c2_g2	sp|Q6GNM0|NRM_XENLA	nrm	Nurim OS=Xenopus laevis GN=nrm PE=2 SV=1	38.7	1.2e-27
TRINITY_DN14762_c1_g2	sp|Q4KTD9|RS3A_SUBDO	-	40S ribosomal protein S3a OS=Suberites domuncula PE=2 SV=1	79.5	1.4e-116
TRINITY_DN14762_c3_g1	sp|P17133|RU17_DROME	snRNP-U1-70K	U1 small nuclear ribonucleoprotein 70 kDa OS=Drosophila melanogaster GN=snRNP-U1-70K PE=1 SV=2	55.6	3.1e-32
TRINITY_DN14762_c3_g2	sp|Q1RMR2|RU17_BOVIN	SNRNP70	U1 small nuclear ribonucleoprotein 70 kDa OS=Bos taurus GN=SNRNP70 PE=2 SV=1	68.2	5.5e-18
TRINITY_DN14763_c0_g4	sp|P55567|Y4MH_SINFN	NGR_a02510	Uncharacterized protein y4mH OS=Sinorhizobium fredii (strain NBRC 101917 / NGR234) GN=NGR_a02510 PE=4 SV=1	39.2	3.9e-18
TRINITY_DN14765_c0_g1	sp|Q2QI47|USH2A_MOUSE	Ush2A	Usherin OS=Mus musculus GN=Ush2A PE=1 SV=2	30.4	9.2e-74
TRINITY_DN14765_c0_g3	sp|Q9HCU4|CELR2_HUMAN	CELSR2	Cadherin EGF LAG seven-pass G-type receptor 2 OS=Homo sapiens GN=CELSR2 PE=1 SV=1	37.2	1.2e-14
TRINITY_DN14766_c0_g2	sp|Q49AN0|CRY2_HUMAN	CRY2	Cryptochrome-2 OS=Homo sapiens GN=CRY2 PE=1 SV=2	37.7	8.5e-43
TRINITY_DN14768_c2_g2	sp|A2AJL3|FGGY_MOUSE	Fggy	FGGY carbohydrate kinase domain-containing protein OS=Mus musculus GN=Fggy PE=1 SV=1	51.1	1.3e-48
TRINITY_DN14770_c0_g3	sp|Q5ZML3|SRSF1_CHICK	SRSF1	Serine/arginine-rich splicing factor 1 OS=Gallus gallus GN=SRSF1 PE=1 SV=3	63	3.7e-61
TRINITY_DN14770_c1_g1	sp|Q8BWT5|DIP2A_MOUSE	Dip2a	Disco-interacting protein 2 homolog A OS=Mus musculus GN=Dip2a PE=1 SV=3	51.7	9.3e-184
TRINITY_DN14770_c1_g5	sp|Q5ZL74|VAMP7_CHICK	VAMP7	Vesicle-associated membrane protein 7 OS=Gallus gallus GN=VAMP7 PE=2 SV=1	47.3	4.9e-21
TRINITY_DN14772_c0_g13	sp|A7YWC4|ATAD3_BOVIN	ATAD3	ATPase family AAA domain-containing protein 3 OS=Bos taurus GN=ATAD3 PE=2 SV=1	69.4	6.6e-11
TRINITY_DN14773_c1_g2	sp|Q96PE2|ARHGH_HUMAN	ARHGEF17	Rho guanine nucleotide exchange factor 17 OS=Homo sapiens GN=ARHGEF17 PE=1 SV=1	32.6	9.5e-85
TRINITY_DN14773_c1_g3	sp|Q8IWT3|CUL9_HUMAN	CUL9	Cullin-9 OS=Homo sapiens GN=CUL9 PE=1 SV=2	25.8	2.4e-97
TRINITY_DN14775_c0_g2	sp|A8E5Y3|GDPP1_XENLA	gdpgp1	GDP-D-glucose phosphorylase 1 OS=Xenopus laevis GN=gdpgp1 PE=2 SV=1	36.5	4.9e-32
TRINITY_DN14775_c0_g3	sp|Q9UBQ7|GRHPR_HUMAN	GRHPR	Glyoxylate reductase/hydroxypyruvate reductase OS=Homo sapiens GN=GRHPR PE=1 SV=1	56.1	1e-23
TRINITY_DN14775_c0_g4	sp|Q8U3Y2|GYAR_PYRFU	gyaR	Glyoxylate reductase OS=Pyrococcus furiosus (strain ATCC 43587 / DSM 3638 / JCM 8422 / Vc1) GN=gyaR PE=1 SV=1	41.7	3.5e-38
TRINITY_DN14776_c0_g1	sp|Q9NRW4|DUS22_HUMAN	DUSP22	Dual specificity protein phosphatase 22 OS=Homo sapiens GN=DUSP22 PE=1 SV=1	32.1	2.9e-14
TRINITY_DN14777_c4_g1	sp|P59723|HIF1N_DANRE	hif1an	Hypoxia-inducible factor 1-alpha inhibitor OS=Danio rerio GN=hif1an PE=2 SV=2	41.8	3.9e-17
TRINITY_DN14778_c0_g1	sp|Q6Q0C0|TRAF7_HUMAN	TRAF7	E3 ubiquitin-protein ligase TRAF7 OS=Homo sapiens GN=TRAF7 PE=1 SV=1	38.3	2.7e-60
TRINITY_DN14778_c0_g2	sp|P84169|PSD13_CHICK	PSMD13	26S proteasome non-ATPase regulatory subunit 13 OS=Gallus gallus GN=PSMD13 PE=1 SV=1	50	6e-73
TRINITY_DN14778_c0_g4	sp|Q9UNM6|PSD13_HUMAN	PSMD13	26S proteasome non-ATPase regulatory subunit 13 OS=Homo sapiens GN=PSMD13 PE=1 SV=2	47	3.8e-10
TRINITY_DN14781_c2_g2	sp|Q921W0|CHM1A_MOUSE	Chmp1a	Charged multivesicular body protein 1a OS=Mus musculus GN=Chmp1a PE=1 SV=1	57.4	5.9e-26
TRINITY_DN14784_c4_g1	sp|O43772|MCAT_HUMAN	SLC25A20	Mitochondrial carnitine/acylcarnitine carrier protein OS=Homo sapiens GN=SLC25A20 PE=1 SV=1	50.5	2.9e-82
TRINITY_DN14785_c3_g4	sp|P20825|POL2_DROME	pol	Retrovirus-related Pol polyprotein from transposon 297 OS=Drosophila melanogaster GN=pol PE=3 SV=1	36.4	2.2e-15
TRINITY_DN14785_c3_g5	sp|P20825|POL2_DROME	pol	Retrovirus-related Pol polyprotein from transposon 297 OS=Drosophila melanogaster GN=pol PE=3 SV=1	52.5	9.5e-13
TRINITY_DN14786_c2_g1	sp|O95619|YETS4_HUMAN	YEATS4	YEATS domain-containing protein 4 OS=Homo sapiens GN=YEATS4 PE=1 SV=1	61	4.3e-63
TRINITY_DN14786_c2_g2	sp|Q9UBR2|CATZ_HUMAN	CTSZ	Cathepsin Z OS=Homo sapiens GN=CTSZ PE=1 SV=1	49.8	1.6e-74
TRINITY_DN14786_c2_g3	sp|Q9CZ04|CSN7A_MOUSE	Cops7a	COP9 signalosome complex subunit 7a OS=Mus musculus GN=Cops7a PE=1 SV=2	42.4	3.5e-31
TRINITY_DN14786_c2_g6	sp|Q8WNV7|DHRS4_PIG	DHRS4	Dehydrogenase/reductase SDR family member 4 OS=Sus scrofa GN=DHRS4 PE=1 SV=2	56.7	1.4e-78
TRINITY_DN14786_c2_g8	sp|Q5R5Z8|SCAM5_PONAB	SCAMP5	Secretory carrier-associated membrane protein 5 OS=Pongo abelii GN=SCAMP5 PE=2 SV=1	36.4	9.4e-24
TRINITY_DN14787_c3_g4	sp|A7SE07|NUBP2_NEMVE	v1g229988	Cytosolic Fe-S cluster assembly factor NUBP2 homolog OS=Nematostella vectensis GN=v1g229988 PE=3 SV=1	78	2.1e-55
TRINITY_DN14791_c4_g1	sp|Q6GNM6|F102A_XENLA	fam102a	Protein FAM102A OS=Xenopus laevis GN=fam102a PE=2 SV=1	50	8.3e-35
TRINITY_DN14791_c4_g2	sp|Q5TZF3|ANR45_HUMAN	ANKRD45	Ankyrin repeat domain-containing protein 45 OS=Homo sapiens GN=ANKRD45 PE=1 SV=1	31.4	6.6e-14
TRINITY_DN14795_c1_g4	sp|Q92609|TBCD5_HUMAN	TBC1D5	TBC1 domain family member 5 OS=Homo sapiens GN=TBC1D5 PE=1 SV=1	40.2	6.6e-77
TRINITY_DN14796_c6_g2	sp|Q08DY9|CASP3_BOVIN	CASP3	Caspase-3 OS=Bos taurus GN=CASP3 PE=2 SV=1	35.9	2.2e-37
TRINITY_DN14798_c2_g1	sp|Q7TSC3|NEK5_MOUSE	Nek5	Serine/threonine-protein kinase Nek5 OS=Mus musculus GN=Nek5 PE=2 SV=1	34.6	3.8e-35
TRINITY_DN14798_c3_g1	sp|Q2YDG3|CD123_BOVIN	CDC123	Cell division cycle protein 123 homolog OS=Bos taurus GN=CDC123 PE=2 SV=1	35.2	1.6e-45
TRINITY_DN14798_c3_g3	sp|A7RFT2|CD123_NEMVE	cdc123	Cell division cycle protein 123 homolog OS=Nematostella vectensis GN=cdc123 PE=3 SV=1	51.2	4.3e-06
TRINITY_DN14802_c1_g1	sp|O60870|KIN17_HUMAN	KIN	DNA/RNA-binding protein KIN17 OS=Homo sapiens GN=KIN PE=1 SV=2	42.8	8.9e-98
TRINITY_DN14803_c4_g1	sp|P16519|NEC2_HUMAN	PCSK2	Neuroendocrine convertase 2 OS=Homo sapiens GN=PCSK2 PE=2 SV=2	42.2	1.3e-99
TRINITY_DN14804_c1_g4	sp|Q969Q5|RAB24_HUMAN	RAB24	Ras-related protein Rab-24 OS=Homo sapiens GN=RAB24 PE=1 SV=1	61	4.8e-62
TRINITY_DN14808_c0_g4	sp|Q9GV41|PGFS_TRYBB	-	Prostaglandin F synthase OS=Trypanosoma brucei brucei PE=1 SV=1	47.3	1.2e-66
TRINITY_DN14810_c0_g1	sp|Q6J4K2|NCKX6_HUMAN	SLC8B1	Sodium/potassium/calcium exchanger 6, mitochondrial OS=Homo sapiens GN=SLC8B1 PE=1 SV=2	42.3	4.5e-39
TRINITY_DN14810_c0_g3	sp|P57682|KLF3_HUMAN	KLF3	Krueppel-like factor 3 OS=Homo sapiens GN=KLF3 PE=1 SV=1	70	3.7e-06
TRINITY_DN14811_c2_g1	sp|Q8WXI2|CNKR2_HUMAN	CNKSR2	Connector enhancer of kinase suppressor of ras 2 OS=Homo sapiens GN=CNKSR2 PE=1 SV=1	32.8	1.9e-30
TRINITY_DN14811_c2_g2	sp|Q86IV4|Y4775_DICDI	DDB_G0274775	PH domain-containing protein DDB_G0274775 OS=Dictyostelium discoideum GN=DDB_G0274775 PE=3 SV=1	30.5	4.8e-12
TRINITY_DN14811_c2_g6	sp|Q8R2L5|RT18C_MOUSE	Mrps18c	28S ribosomal protein S18c, mitochondrial OS=Mus musculus GN=Mrps18c PE=1 SV=1	37.7	8.1e-06
TRINITY_DN14812_c5_g4	sp|Q9NZC4|EHF_HUMAN	EHF	ETS homologous factor OS=Homo sapiens GN=EHF PE=2 SV=1	51.2	1e-17
TRINITY_DN14812_c5_g5	sp|Q9NQX3|GEPH_HUMAN	GPHN	Gephyrin OS=Homo sapiens GN=GPHN PE=1 SV=1	45.8	1.1e-135
TRINITY_DN14812_c5_g7	sp|Q9JJ66|CDC20_MOUSE	Cdc20	Cell division cycle protein 20 homolog OS=Mus musculus GN=Cdc20 PE=1 SV=2	44	1.9e-75
TRINITY_DN14812_c5_g9	sp|Q2YDE4|PSA6_BOVIN	PSMA6	Proteasome subunit alpha type-6 OS=Bos taurus GN=PSMA6 PE=1 SV=1	70	3.5e-101
TRINITY_DN14813_c0_g1	sp|Q62130|PTN14_MOUSE	Ptpn14	Tyrosine-protein phosphatase non-receptor type 14 OS=Mus musculus GN=Ptpn14 PE=1 SV=2	38.5	2e-12
TRINITY_DN14813_c0_g3	sp|Q5MB13|ABCG2_MACMU	ABCG2	ATP-binding cassette sub-family G member 2 OS=Macaca mulatta GN=ABCG2 PE=2 SV=1	58.9	7e-39
TRINITY_DN14813_c0_g4	sp|Q9D0J4|ARL2_MOUSE	Arl2	ADP-ribosylation factor-like protein 2 OS=Mus musculus GN=Arl2 PE=1 SV=1	80.2	5e-39
TRINITY_DN14814_c0_g1	sp|Q9QZH3|PPIE_MOUSE	Ppie	Peptidyl-prolyl cis-trans isomerase E OS=Mus musculus GN=Ppie PE=1 SV=2	72.9	2.9e-66
TRINITY_DN14814_c1_g1	sp|Q8CGY8|OGT1_MOUSE	Ogt	UDP-N-acetylglucosamine--peptide N-acetylglucosaminyltransferase 110 kDa subunit OS=Mus musculus GN=Ogt PE=1 SV=2	48.6	1e-98
TRINITY_DN14814_c1_g2	sp|P32865|GPRK1_DROME	Gprk1	G protein-coupled receptor kinase 1 OS=Drosophila melanogaster GN=Gprk1 PE=2 SV=2	44.5	1.9e-72
TRINITY_DN14817_c1_g1	sp|Q9JK66|PRKN2_RAT	Park2	E3 ubiquitin-protein ligase parkin OS=Rattus norvegicus GN=Park2 PE=1 SV=1	58.5	2.8e-13
TRINITY_DN14817_c1_g2	sp|P82348|SGCG_MOUSE	Sgcg	Gamma-sarcoglycan OS=Mus musculus GN=Sgcg PE=1 SV=2	36.7	9.3e-33
TRINITY_DN14817_c1_g3	sp|Q9WU78|PDC6I_MOUSE	Pdcd6ip	Programmed cell death 6-interacting protein OS=Mus musculus GN=Pdcd6ip PE=1 SV=3	31.7	2.9e-91
TRINITY_DN14817_c1_g4	sp|Q13123|RED_HUMAN	IK	Protein Red OS=Homo sapiens GN=IK PE=1 SV=3	45.4	7.6e-89
TRINITY_DN14817_c1_g5	sp|Q91YU8|SSF1_MOUSE	Ppan	Suppressor of SWI4 1 homolog OS=Mus musculus GN=Ppan PE=1 SV=2	41	5.5e-79
TRINITY_DN14817_c1_g9	sp|Q5M9G1|HEXI1_RAT	Hexim1	Protein HEXIM1 OS=Rattus norvegicus GN=Hexim1 PE=1 SV=1	34.3	4.3e-13
TRINITY_DN14818_c0_g1	sp|P57735|RAB25_HUMAN	RAB25	Ras-related protein Rab-25 OS=Homo sapiens GN=RAB25 PE=1 SV=2	64.8	2.2e-12
TRINITY_DN14818_c0_g3	sp|Q9SMQ6|RAA4B_ARATH	RABA4B	Ras-related protein RABA4b OS=Arabidopsis thaliana GN=RABA4B PE=1 SV=1	47	8.2e-34
TRINITY_DN14818_c1_g1	sp|P20337|RAB3B_HUMAN	RAB3B	Ras-related protein Rab-3B OS=Homo sapiens GN=RAB3B PE=1 SV=2	43	9.5e-41
TRINITY_DN14819_c0_g1	sp|Q6IQP3|CALUA_DANRE	calua	Calumenin-A OS=Danio rerio GN=calua PE=2 SV=1	47.7	1.7e-64
TRINITY_DN14821_c1_g7	sp|Q1KME6|RAB6A_CHICK	RAB6A	Ras-related protein Rab-6A OS=Gallus gallus GN=RAB6A PE=2 SV=3	38.1	2.7e-30
TRINITY_DN14822_c2_g1	sp|Q8TBZ3|WDR20_HUMAN	WDR20	WD repeat-containing protein 20 OS=Homo sapiens GN=WDR20 PE=1 SV=2	35.8	7.3e-80
TRINITY_DN14824_c1_g1	sp|Q9QZ67|PPM1D_MOUSE	Ppm1d	Protein phosphatase 1D OS=Mus musculus GN=Ppm1d PE=2 SV=2	28.7	4.2e-25
TRINITY_DN14824_c2_g1	sp|Q3SYZ3|CR3L3_BOVIN	CREB3L3	Cyclic AMP-responsive element-binding protein 3-like protein 3 OS=Bos taurus GN=CREB3L3 PE=2 SV=1	45.6	5e-28
TRINITY_DN14825_c0_g2	sp|Q05421|CP2E1_MOUSE	Cyp2e1	Cytochrome P450 2E1 OS=Mus musculus GN=Cyp2e1 PE=1 SV=1	100	6.3e-43
TRINITY_DN14825_c0_g5	sp|P01899|HA11_MOUSE	H2-D1	H-2 class I histocompatibility antigen, D-B alpha chain OS=Mus musculus GN=H2-D1 PE=1 SV=2	97.2	7.6e-60
TRINITY_DN14825_c0_g6	sp|P01897|HA1L_MOUSE	H2-L	H-2 class I histocompatibility antigen, L-D alpha chain OS=Mus musculus GN=H2-L PE=1 SV=2	100	1.9e-41
TRINITY_DN14826_c4_g2	sp|Q6P5I8|YIPF5_DANRE	yipf5	Protein YIPF5 OS=Danio rerio GN=yipf5 PE=2 SV=1	60.5	1.1e-44
TRINITY_DN14826_c6_g1	sp|P0C1Z2|CISY_MACFA	CS	Citrate synthase, mitochondrial OS=Macaca fascicularis GN=CS PE=2 SV=1	70.2	2.5e-185
TRINITY_DN14828_c0_g1	sp|Q96FW1|OTUB1_HUMAN	OTUB1	Ubiquitin thioesterase OTUB1 OS=Homo sapiens GN=OTUB1 PE=1 SV=2	49	8.2e-71
TRINITY_DN1482_c0_g1	sp|Q3T0W9|RL19_BOVIN	RPL19	60S ribosomal protein L19 OS=Bos taurus GN=RPL19 PE=2 SV=1	100	5.3e-36
TRINITY_DN14830_c0_g3	sp|Q6NXW6|RAD17_MOUSE	Rad17	Cell cycle checkpoint protein RAD17 OS=Mus musculus GN=Rad17 PE=1 SV=2	36.7	3.2e-52
TRINITY_DN14834_c0_g1	sp|Q9JJX6|P2RX4_MOUSE	P2rx4	P2X purinoceptor 4 OS=Mus musculus GN=P2rx4 PE=1 SV=1	40	4.8e-41
TRINITY_DN14835_c0_g2	sp|Q7Z401|MYCPP_HUMAN	DENND4A	C-myc promoter-binding protein OS=Homo sapiens GN=DENND4A PE=1 SV=2	31.7	1.1e-22
TRINITY_DN14835_c0_g3	sp|Q9NV56|MRGBP_HUMAN	MRGBP	MRG/MORF4L-binding protein OS=Homo sapiens GN=MRGBP PE=1 SV=1	47.6	2.2e-16
TRINITY_DN14835_c1_g1	sp|Q86YT5|S13A5_HUMAN	SLC13A5	Solute carrier family 13 member 5 OS=Homo sapiens GN=SLC13A5 PE=1 SV=1	37.9	6.7e-98
TRINITY_DN14835_c1_g2	sp|Q13183|S13A2_HUMAN	SLC13A2	Solute carrier family 13 member 2 OS=Homo sapiens GN=SLC13A2 PE=2 SV=1	44.3	2.2e-08
TRINITY_DN14837_c0_g1	sp|Q7Z408|CSMD2_HUMAN	CSMD2	CUB and sushi domain-containing protein 2 OS=Homo sapiens GN=CSMD2 PE=1 SV=2	31.1	4.6e-08
TRINITY_DN14838_c0_g1	sp|Q7ZUY3|H2AX_DANRE	h2afx	Histone H2AX OS=Danio rerio GN=h2afx PE=2 SV=3	82.6	4.4e-47
TRINITY_DN14838_c0_g2	sp|Q7ZUY3|H2AX_DANRE	h2afx	Histone H2AX OS=Danio rerio GN=h2afx PE=2 SV=3	79.9	3.6e-52
TRINITY_DN14839_c2_g1	sp|Q8N357|S35F6_HUMAN	SLC35F6	Solute carrier family 35 member F6 OS=Homo sapiens GN=SLC35F6 PE=1 SV=1	47.6	3.8e-84
TRINITY_DN1483_c0_g1	sp|Q9UNX3|RL26L_HUMAN	RPL26L1	60S ribosomal protein L26-like 1 OS=Homo sapiens GN=RPL26L1 PE=1 SV=1	73.7	6.3e-49
TRINITY_DN14840_c2_g1	sp|Q8WML3|KAT6B_MACFA	KAT6B	Histone acetyltransferase KAT6B OS=Macaca fascicularis GN=KAT6B PE=2 SV=1	47.8	2e-179
TRINITY_DN14840_c4_g1	sp|Q32LC9|ZN330_BOVIN	ZNF330	Zinc finger protein 330 OS=Bos taurus GN=ZNF330 PE=2 SV=1	71.4	9.9e-59
TRINITY_DN14842_c3_g1	sp|Q08DX7|SPNS1_BOVIN	SPNS1	Protein spinster homolog 1 OS=Bos taurus GN=SPNS1 PE=2 SV=1	55.2	1.7e-42
TRINITY_DN14843_c0_g2	sp|P14882|PCCA_RAT	Pcca	Propionyl-CoA carboxylase alpha chain, mitochondrial OS=Rattus norvegicus GN=Pcca PE=1 SV=3	56	5.2e-203
TRINITY_DN14846_c0_g1	sp|Q17031|CDC42_ANOGA	Cdc42	Cdc42 homolog OS=Anopheles gambiae GN=Cdc42 PE=2 SV=2	47.8	3.3e-42
TRINITY_DN14847_c1_g1	sp|Q8N684|CPSF7_HUMAN	CPSF7	Cleavage and polyadenylation specificity factor subunit 7 OS=Homo sapiens GN=CPSF7 PE=1 SV=1	28.4	1.9e-19
TRINITY_DN14849_c0_g7	sp|Q91WU5|AS3MT_MOUSE	As3mt	Arsenite methyltransferase OS=Mus musculus GN=As3mt PE=1 SV=2	48.1	3.5e-91
TRINITY_DN14851_c0_g3	sp|P54319|PLAP_RAT	Plaa	Phospholipase A-2-activating protein OS=Rattus norvegicus GN=Plaa PE=1 SV=3	35.3	6.5e-85
TRINITY_DN14852_c0_g2	sp|Q91W59|RBMS1_MOUSE	Rbms1	RNA-binding motif, single-stranded-interacting protein 1 OS=Mus musculus GN=Rbms1 PE=1 SV=1	45.4	6.1e-60
TRINITY_DN14852_c0_g3	sp|Q8C190|VP9D1_MOUSE	Vps9d1	VPS9 domain-containing protein 1 OS=Mus musculus GN=Vps9d1 PE=1 SV=1	35.7	6.8e-25
TRINITY_DN14852_c0_g4	sp|O00560|SDCB1_HUMAN	SDCBP	Syntenin-1 OS=Homo sapiens GN=SDCBP PE=1 SV=1	45.9	2.9e-66
TRINITY_DN14856_c1_g1	sp|P58397|ATS12_HUMAN	ADAMTS12	A disintegrin and metalloproteinase with thrombospondin motifs 12 OS=Homo sapiens GN=ADAMTS12 PE=1 SV=2	31.5	1.8e-48
TRINITY_DN14857_c0_g1	sp|O75592|MYCB2_HUMAN	MYCBP2	E3 ubiquitin-protein ligase MYCBP2 OS=Homo sapiens GN=MYCBP2 PE=1 SV=3	29.7	6e-56
TRINITY_DN14860_c2_g2	sp|Q2U4L7|GTAA_ASPOR	gtaA	Glutaminase A OS=Aspergillus oryzae (strain ATCC 42149 / RIB 40) GN=gtaA PE=1 SV=2	29.7	3.3e-39
TRINITY_DN14861_c3_g3	sp|Q9TTI7|PIT1_CANLF	POU1F1	Pituitary-specific positive transcription factor 1 OS=Canis lupus familiaris GN=POU1F1 PE=2 SV=1	46	8.3e-28
TRINITY_DN14861_c3_g6	sp|P50902|WT1_ALLMI	WT1	Wilms tumor protein homolog (Fragment) OS=Alligator mississippiensis GN=WT1 PE=2 SV=1	62.2	5.8e-07
TRINITY_DN14863_c0_g1	sp|M0RC99|RAB5A_RAT	Rab5a	Ras-related protein Rab-5A OS=Rattus norvegicus GN=Rab5a PE=2 SV=1	56.9	2.6e-24
TRINITY_DN14863_c1_g1	sp|P51148|RAB5C_HUMAN	RAB5C	Ras-related protein Rab-5C OS=Homo sapiens GN=RAB5C PE=1 SV=2	78.2	6.4e-87
TRINITY_DN14864_c0_g4	sp|O42123|FKB1A_XENLA	fkbp1a	Peptidyl-prolyl cis-trans isomerase FKBP1A OS=Xenopus laevis GN=fkbp1a PE=3 SV=3	68.5	3.6e-38
TRINITY_DN14864_c1_g1	sp|Q70EL4|UBP43_HUMAN	USP43	Ubiquitin carboxyl-terminal hydrolase 43 OS=Homo sapiens GN=USP43 PE=1 SV=2	28.9	2.3e-24
TRINITY_DN14867_c2_g1	sp|O42287|ITSN1_XENLA	itsn1	Intersectin-1 OS=Xenopus laevis GN=itsn1 PE=1 SV=1	50.8	1.3e-08
TRINITY_DN14867_c3_g1	sp|Q01406|SRC8_CHICK	CTTN1	Src substrate protein p85 OS=Gallus gallus GN=CTTN1 PE=1 SV=1	59	5e-17
TRINITY_DN14868_c4_g2	sp|Q63772|GAS6_RAT	Gas6	Growth arrest-specific protein 6 OS=Rattus norvegicus GN=Gas6 PE=1 SV=1	51.2	5.9e-07
TRINITY_DN14869_c1_g1	sp|Q8C0J2|A16L1_MOUSE	Atg16l1	Autophagy-related protein 16-1 OS=Mus musculus GN=Atg16l1 PE=1 SV=1	43.6	1.8e-13
TRINITY_DN14869_c2_g2	sp|Q9ZTW3|VA721_ARATH	VAMP721	Vesicle-associated membrane protein 721 OS=Arabidopsis thaliana GN=VAMP721 PE=2 SV=1	37.2	3.6e-08
TRINITY_DN14871_c5_g2	sp|Q5ZLX5|ZRAB2_CHICK	ZRANB2	Zinc finger Ran-binding domain-containing protein 2 OS=Gallus gallus GN=ZRANB2 PE=2 SV=1	62.3	3.5e-24
TRINITY_DN14871_c5_g8	sp|Q03330|GCN5_YEAST	GCN5	Histone acetyltransferase GCN5 OS=Saccharomyces cerevisiae (strain ATCC 204508 / S288c) GN=GCN5 PE=1 SV=1	42	9.7e-14
TRINITY_DN14873_c0_g1	sp|Q7ZW46|S35B4_DANRE	slc35b4	UDP-xylose and UDP-N-acetylglucosamine transporter OS=Danio rerio GN=slc35b4 PE=2 SV=1	49.5	3.6e-73
TRINITY_DN14874_c1_g1	sp|Q93ZC9|GLAK1_ARATH	GLCAK1	Glucuronokinase 1 OS=Arabidopsis thaliana GN=GLCAK1 PE=1 SV=1	52.1	2.4e-88
TRINITY_DN14878_c2_g1	sp|P07607|TYSY_MOUSE	Tyms	Thymidylate synthase OS=Mus musculus GN=Tyms PE=1 SV=1	60.4	2.4e-25
TRINITY_DN14878_c3_g1	sp|Q54DY7|SCPL1_DICDI	DDB_G0291912	Serine carboxypeptidase S10 family member 1 OS=Dictyostelium discoideum GN=DDB_G0291912 PE=3 SV=1	46	1.6e-61
TRINITY_DN14878_c3_g2	sp|P52712|CBPX_ORYSJ	CBP31	Serine carboxypeptidase-like OS=Oryza sativa subsp. japonica GN=CBP31 PE=2 SV=2	40.6	5.2e-86
TRINITY_DN14878_c3_g3	sp|Q4KTI3|RL5_SUBDO	RPL5	60S ribosomal protein L5 OS=Suberites domuncula GN=RPL5 PE=2 SV=1	62.4	3.5e-86
TRINITY_DN14878_c3_g5	sp|Q54DY7|SCPL1_DICDI	DDB_G0291912	Serine carboxypeptidase S10 family member 1 OS=Dictyostelium discoideum GN=DDB_G0291912 PE=3 SV=1	46.4	7.4e-65
TRINITY_DN14878_c3_g7	sp|P24368|PPIB_RAT	Ppib	Peptidyl-prolyl cis-trans isomerase B OS=Rattus norvegicus GN=Ppib PE=1 SV=3	68.9	3e-75
TRINITY_DN14879_c1_g3	sp|P33497|RYK_AVIR3	V-RYK	Tyrosine-protein kinase transforming protein RYK OS=Avian retrovirus RPL30 GN=V-RYK PE=2 SV=1	44.3	5.4e-63
TRINITY_DN14880_c2_g1	sp|Q3UF64|RNFT2_MOUSE	Rnft2	RING finger and transmembrane domain-containing protein 2 OS=Mus musculus GN=Rnft2 PE=2 SV=2	36.6	4.6e-53
TRINITY_DN14882_c0_g1	sp|Q5U5C5|PRP31_XENLA	prpf31	U4/U6 small nuclear ribonucleoprotein Prp31 OS=Xenopus laevis GN=prpf31 PE=2 SV=1	58.1	5.2e-82
TRINITY_DN14882_c0_g10	sp|P11586|C1TC_HUMAN	MTHFD1	C-1-tetrahydrofolate synthase, cytoplasmic OS=Homo sapiens GN=MTHFD1 PE=1 SV=3	65.7	0
TRINITY_DN14882_c0_g2	sp|Q6GPJ9|GRB2B_XENLA	grb2-b	Growth factor receptor-bound protein 2-B OS=Xenopus laevis GN=grb2-b PE=1 SV=1	74.3	1.4e-38
TRINITY_DN14882_c0_g4	sp|Q9FF31|LRL21_ARATH	LRK10L-2.1	LEAF RUST 10 DISEASE-RESISTANCE LOCUS RECEPTOR-LIKE PROTEIN KINASE-like 2.1 OS=Arabidopsis thaliana GN=LRK10L-2.1 PE=3 SV=1	39.4	4.1e-08
TRINITY_DN14883_c0_g1	sp|Q91YQ1|RAB7L_MOUSE	Rab29	Ras-related protein Rab-7L1 OS=Mus musculus GN=Rab29 PE=1 SV=1	56.2	4.9e-51
TRINITY_DN14883_c1_g1	sp|O14495|PLPP3_HUMAN	PLPP3	Phospholipid phosphatase 3 OS=Homo sapiens GN=PLPP3 PE=1 SV=1	40.8	3.4e-08
TRINITY_DN14884_c0_g3	sp|Q9BXT6|M10L1_HUMAN	MOV10L1	RNA helicase Mov10l1 OS=Homo sapiens GN=MOV10L1 PE=2 SV=1	33.7	6.1e-67
TRINITY_DN14884_c0_g4	sp|Q9R152|PARP1_CRIGR	PARP1	Poly [ADP-ribose] polymerase 1 OS=Cricetulus griseus GN=PARP1 PE=2 SV=3	45	2e-39
TRINITY_DN14884_c0_g6	sp|P26446|PARP1_CHICK	PARP1	Poly [ADP-ribose] polymerase 1 OS=Gallus gallus GN=PARP1 PE=1 SV=2	52.9	2.5e-235
TRINITY_DN14886_c1_g2	sp|Q8K1X1|WDR11_MOUSE	Wdr11	WD repeat-containing protein 11 OS=Mus musculus GN=Wdr11 PE=1 SV=1	34.5	1.9e-235
TRINITY_DN14890_c0_g1	sp|O43143|DHX15_HUMAN	DHX15	Pre-mRNA-splicing factor ATP-dependent RNA helicase DHX15 OS=Homo sapiens GN=DHX15 PE=1 SV=2	78	0
TRINITY_DN14891_c0_g2	sp|Q8BGQ1|SPE39_MOUSE	Vipas39	Spermatogenesis-defective protein 39 homolog OS=Mus musculus GN=Vipas39 PE=1 SV=1	31.6	6e-43
TRINITY_DN14891_c0_g3	sp|Q9Y2K2|SIK3_HUMAN	SIK3	Serine/threonine-protein kinase SIK3 OS=Homo sapiens GN=SIK3 PE=1 SV=3	39.7	7.6e-44
TRINITY_DN14892_c1_g2	sp|Q8QZR1|ATTY_MOUSE	Tat	Tyrosine aminotransferase OS=Mus musculus GN=Tat PE=1 SV=1	54.2	3.7e-85
TRINITY_DN14893_c1_g1	sp|Q90932|NFIX_CHICK	NFIX	Nuclear factor 1 X-type OS=Gallus gallus GN=NFIX PE=2 SV=1	68.3	1.9e-66
TRINITY_DN14895_c0_g2	sp|Q5XHI9|HUNKA_XENLA	hunk-a	Hormonally up-regulated neu tumor-associated kinase homolog A OS=Xenopus laevis GN=hunk-a PE=2 SV=1	45.5	9.6e-101
TRINITY_DN14897_c1_g1	sp|P97521|MCAT_RAT	Slc25a20	Mitochondrial carnitine/acylcarnitine carrier protein OS=Rattus norvegicus GN=Slc25a20 PE=1 SV=1	52.5	1e-10
TRINITY_DN14897_c1_g2	sp|O43772|MCAT_HUMAN	SLC25A20	Mitochondrial carnitine/acylcarnitine carrier protein OS=Homo sapiens GN=SLC25A20 PE=1 SV=1	41.7	9.5e-52
TRINITY_DN14899_c1_g1	sp|Q92841|DDX17_HUMAN	DDX17	Probable ATP-dependent RNA helicase DDX17 OS=Homo sapiens GN=DDX17 PE=1 SV=2	73.1	1.6e-158
TRINITY_DN14905_c3_g3	sp|Q8TBE0|BAHD1_HUMAN	BAHD1	Bromo adjacent homology domain-containing 1 protein OS=Homo sapiens GN=BAHD1 PE=1 SV=2	44.9	6.5e-20
TRINITY_DN14906_c0_g1	sp|P24797|AT1A2_CHICK	ATP1A2	Sodium/potassium-transporting ATPase subunit alpha-2 OS=Gallus gallus GN=ATP1A2 PE=2 SV=1	55.6	2.1e-104
TRINITY_DN14907_c0_g1	sp|Q4KLT0|RN217_XENLA	rnf217	Probable E3 ubiquitin-protein ligase RNF217 OS=Xenopus laevis GN=rnf217 PE=2 SV=1	40.2	1.2e-50
TRINITY_DN14908_c2_g3	sp|Q2HZX7|FUZZY_XENTR	fuz	Protein fuzzy homolog OS=Xenopus tropicalis GN=fuz PE=1 SV=1	46.8	6.3e-45
TRINITY_DN14908_c2_g5	sp|Q2HZX7|FUZZY_XENTR	fuz	Protein fuzzy homolog OS=Xenopus tropicalis GN=fuz PE=1 SV=1	43.6	2.9e-15
TRINITY_DN14911_c1_g5	sp|Q9Y2I7|FYV1_HUMAN	PIKFYVE	1-phosphatidylinositol 3-phosphate 5-kinase OS=Homo sapiens GN=PIKFYVE PE=1 SV=3	29.2	1.6e-109
TRINITY_DN14912_c1_g2	sp|A5D7I4|EXT1_BOVIN	EXT1	Exostosin-1 OS=Bos taurus GN=EXT1 PE=2 SV=1	42.4	3.1e-97
TRINITY_DN14912_c1_g3	sp|Q23978|MY31D_DROME	Myo31DF	Myosin-IA OS=Drosophila melanogaster GN=Myo31DF PE=2 SV=1	49.3	4.7e-71
TRINITY_DN14912_c1_g4	sp|P14617|INSRR_CAVPO	INSRR	Insulin receptor-related protein OS=Cavia porcellus GN=INSRR PE=3 SV=1	34.1	6.7e-38
TRINITY_DN14912_c1_g5	sp|O94832|MYO1D_HUMAN	MYO1D	Unconventional myosin-Id OS=Homo sapiens GN=MYO1D PE=1 SV=2	65.8	3.1e-52
TRINITY_DN14913_c0_g1	sp|O15254|ACOX3_HUMAN	ACOX3	Peroxisomal acyl-coenzyme A oxidase 3 OS=Homo sapiens GN=ACOX3 PE=1 SV=2	46.6	2.4e-151
TRINITY_DN14914_c0_g1	sp|O00418|EF2K_HUMAN	EEF2K	Eukaryotic elongation factor 2 kinase OS=Homo sapiens GN=EEF2K PE=1 SV=2	60.6	6.2e-56
TRINITY_DN14914_c0_g3	sp|O00418|EF2K_HUMAN	EEF2K	Eukaryotic elongation factor 2 kinase OS=Homo sapiens GN=EEF2K PE=1 SV=2	71.8	7e-21
TRINITY_DN14915_c0_g1	sp|Q5PYH7|DLG2_DANRE	dlg2	Disks large homolog 2 OS=Danio rerio GN=dlg2 PE=2 SV=1	48.1	2.2e-13
TRINITY_DN14916_c1_g1	sp|O08873|MADD_RAT	Madd	MAP kinase-activating death domain protein OS=Rattus norvegicus GN=Madd PE=1 SV=1	28.5	9e-35
TRINITY_DN14916_c1_g5	sp|P49130|LAMP2_CRIGR	LAMP2	Lysosome-associated membrane glycoprotein 2 OS=Cricetulus griseus GN=LAMP2 PE=2 SV=1	32.5	4.5e-10
TRINITY_DN14917_c3_g3	sp|Q8BMJ2|SYLC_MOUSE	Lars	Leucine--tRNA ligase, cytoplasmic OS=Mus musculus GN=Lars PE=1 SV=2	55.7	0
TRINITY_DN14918_c3_g3	sp|Q91X43|SH319_MOUSE	Sh3d19	SH3 domain-containing protein 19 OS=Mus musculus GN=Sh3d19 PE=1 SV=2	31.8	3.6e-56
TRINITY_DN14919_c3_g2	sp|P70099|RAD51_CRIGR	RAD51	DNA repair protein RAD51 homolog 1 OS=Cricetulus griseus GN=RAD51 PE=2 SV=1	88.5	8.2e-162
TRINITY_DN14919_c3_g3	sp|P0AER2|GLPF_ECO57	glpF	Glycerol uptake facilitator protein OS=Escherichia coli O157:H7 GN=glpF PE=3 SV=1	37.5	3.5e-37
TRINITY_DN14919_c3_g4	sp|P44826|GLPF_HAEIN	glpF	Glycerol uptake facilitator protein OS=Haemophilus influenzae (strain ATCC 51907 / DSM 11121 / KW20 / Rd) GN=glpF PE=3 SV=1	39.9	9.8e-38
TRINITY_DN14919_c3_g5	sp|P43549|YFF4_YEAST	YFL054C	Uncharacterized membrane protein YFL054C OS=Saccharomyces cerevisiae (strain ATCC 204508 / S288c) GN=YFL054C PE=1 SV=1	29.2	1.1e-18
TRINITY_DN14920_c1_g3	sp|Q9W5D4|POMT2_DROME	tw	Protein O-mannosyl-transferase 2 OS=Drosophila melanogaster GN=tw PE=2 SV=1	45.9	5.7e-199
TRINITY_DN14922_c0_g2	sp|Q99805|TM9S2_HUMAN	TM9SF2	Transmembrane 9 superfamily member 2 OS=Homo sapiens GN=TM9SF2 PE=1 SV=1	60.2	1.1e-138
TRINITY_DN14923_c1_g2	sp|Q5ZID0|NMRL1_CHICK	NMRAL1	NmrA-like family domain-containing protein 1 OS=Gallus gallus GN=NMRAL1 PE=2 SV=1	43.6	2.9e-61
TRINITY_DN14925_c0_g1	sp|Q8IWZ6|BBS7_HUMAN	BBS7	Bardet-Biedl syndrome 7 protein OS=Homo sapiens GN=BBS7 PE=1 SV=2	52.7	8.6e-219
TRINITY_DN14926_c5_g1	sp|Q9NGC3|CEG1A_DROME	CenG1A	Centaurin-gamma-1A OS=Drosophila melanogaster GN=CenG1A PE=2 SV=2	27.2	5.3e-20
TRINITY_DN14926_c5_g2	sp|Q2HJI2|NDUF3_BOVIN	NDUFAF3	NADH dehydrogenase [ubiquinone] 1 alpha subcomplex assembly factor 3 OS=Bos taurus GN=NDUFAF3 PE=2 SV=1	52.1	4.8e-32
TRINITY_DN14926_c5_g6	sp|Q0D2E8|RFT1_XENTR	rft1	Protein RFT1 homolog OS=Xenopus tropicalis GN=rft1 PE=2 SV=1	48.3	1.6e-129
TRINITY_DN14927_c0_g1	sp|P49321|NASP_HUMAN	NASP	Nuclear autoantigenic sperm protein OS=Homo sapiens GN=NASP PE=1 SV=2	35.6	2e-16
TRINITY_DN14927_c1_g1	sp|Q14186|TFDP1_HUMAN	TFDP1	Transcription factor Dp-1 OS=Homo sapiens GN=TFDP1 PE=1 SV=1	50.5	9.5e-73
TRINITY_DN14928_c0_g1	sp|Q8VDU0|GPSM2_MOUSE	Gpsm2	G-protein-signaling modulator 2 OS=Mus musculus GN=Gpsm2 PE=1 SV=2	62.2	3.4e-28
TRINITY_DN14928_c0_g3	sp|A9JS51|F166B_XENLA	fam166b	Protein FAM166B OS=Xenopus laevis GN=fam166b PE=2 SV=1	37.6	9.5e-40
TRINITY_DN14928_c0_g4	sp|Q5R7H0|DHTK1_PONAB	DHTKD1	Probable 2-oxoglutarate dehydrogenase E1 component DHKTD1, mitochondrial OS=Pongo abelii GN=DHTKD1 PE=2 SV=1	56.3	1.4e-303
TRINITY_DN14930_c0_g1	sp|Q9UHY1|NRBP_HUMAN	NRBP1	Nuclear receptor-binding protein OS=Homo sapiens GN=NRBP1 PE=1 SV=1	38	2.8e-73
TRINITY_DN14930_c0_g4	sp|Q91YL7|PG2IP_MOUSE	Cwh43	PGAP2-interacting protein OS=Mus musculus GN=Cwh43 PE=1 SV=1	30.8	1.5e-17
TRINITY_DN14932_c1_g1	sp|Q9JKK1|STX6_MOUSE	Stx6	Syntaxin-6 OS=Mus musculus GN=Stx6 PE=1 SV=1	28.3	1.7e-21
[truncated: 5,262 more rows]
