# Supplementary material for: Freshwater sponge hosts and their green algae symbionts: a tractable model to understand intracellular symbiosis
Source: PeerJ. 2021 Feb 11;9:e10654. doi: 10.7717/peerj.10654 (PMC7882143; doi:10.7717/peerj.10654)
Supplement: Supplemental Information 18 [file peerj-09-10654-s018.xlsx]

## Sheet: Sheet1
Query	eggNOG_hit	eggNOG_identity	eggNOG_evalue	NOG	COGFunctionalCategory	COGFunctionalCategoryDescription	NOGDescription
TRINITY_DN10001_c0_g1	9258.ENSOANP00000019757	33.9	6.9e-47	ENOG410XT0Z	S	Function unknown	adenosine deaminase
TRINITY_DN10007_c0_g1	3694.POPTR_0017s02770.1	91	1.9e-32	COG0174	E	Amino acid transport and metabolism	glutamine synthetase
TRINITY_DN10027_c0_g1	400682.PAC_15703983	53.5	4.4e-13	COG2801	L	Replication, recombination and repair	Retrotransposon protein
TRINITY_DN10028_c0_g1	400682.PAC_15718734	80.7	6.8e-90	COG1100	S	Function unknown	GTP-binding Protein
TRINITY_DN10034_c0_g1	3847.GLYMA07G04890.1	96.1	1.1e-35	COG0052	J	Translation, ribosomal structure and biogenesis	30S ribosomal protein S2
TRINITY_DN10047_c0_g1	8364.ENSXETP00000059983	57.6	1.2e-33	ENOG4111TR4	C	Energy production and conversion	etc complex i subunit conserved region
TRINITY_DN10049_c0_g1	400682.PAC_15721253	80.4	1.2e-287	COG1245	S	Function unknown	ATP-binding cassette, sub-family E
TRINITY_DN10051_c0_g1	45351.NEMVEDRAFT_v1g87714-PA	93.9	7.9e-37	ENOG4111TVI	O	Posttranslational modification, protein turnover, chaperones	Ubiquitin-fold modifier 1
TRINITY_DN10058_c0_g1	400682.PAC_15720794	46.1	5.3e-132	ENOG410XP5G	S	Function unknown	Methyltransferase
TRINITY_DN10059_c0_g1	223926.VPA1292	55.3	5.6e-32	COG1816	F	Nucleotide transport and metabolism	adenosine deaminase
TRINITY_DN10059_c0_g2	266264.Rmet_0890	53.6	3.9e-58	COG1816	F	Nucleotide transport and metabolism	adenosine deaminase
TRINITY_DN10081_c0_g2	395495.Lcho_3863	96.3	6.4e-37	COG0480	J	Translation, ribosomal structure and biogenesis	Catalyzes the GTP-dependent ribosomal translocation step during translation elongation. During this step, the ribosome changes from the pre-translocational (PRE) to the post- translocational (POST) state as the newly formed A-site-bound peptidyl-tRNA and P-site-bound deacylated tRNA move to the P and E sites, respectively. Catalyzes the coordinated movement of the two tRNA molecules, the mRNA and…
TRINITY_DN10087_c0_g1	7739.JGI119689	62.5	1.4e-10	ENOG4111HTD	S	Function unknown	DAZ interacting protein
TRINITY_DN10098_c0_g1	5306.JGI73308	24.5	1.5e-09	COG0654	C	Energy production and conversion	oxidoreductase activity, acting on paired donors, with incorporation or reduction of molecular oxygen, NAD(P)H as one donor, and incorporation of one atom of oxygen
TRINITY_DN10098_c0_g1	5306.JGI73308	24.5	1.5e-09	COG0654	H	Coenzyme transport and metabolism	oxidoreductase activity, acting on paired donors, with incorporation or reduction of molecular oxygen, NAD(P)H as one donor, and incorporation of one atom of oxygen
TRINITY_DN10109_c0_g1	400682.PAC_15725855	66.5	7.6e-83	COG0625	O	Posttranslational modification, protein turnover, chaperones	glutathione Stransferase
TRINITY_DN10120_c0_g1	400682.PAC_15715425	30.4	2.3e-23	NA	NA	NA	NA
TRINITY_DN10122_c0_g1	400682.PAC_15723718	61.9	9.6e-50	ENOG4111PFV	S	Function unknown	Polyadenylate-binding protein
TRINITY_DN10136_c0_g1	400682.PAC_15723920	77.2	2.7e-112	COG0330	O	Posttranslational modification, protein turnover, chaperones	Band 7 protein
TRINITY_DN10141_c0_g1	6669.DappuP306455	72.4	2.1e-63	COG0105	F	Nucleotide transport and metabolism	Major role in the synthesis of nucleoside triphosphates other than ATP. The ATP gamma phosphate is transferred to the NDP beta phosphate via a ping-pong mechanism, using a phosphorylated active-site intermediate (By similarity)
TRINITY_DN10144_c0_g1	9031.ENSGALP00000013106	75	2e-88	COG0852	C	Energy production and conversion	NDH-1 shuttles electrons from NADH, via FMN and iron- sulfur (Fe-S) centers, to quinones in the respiratory chain. The immediate electron acceptor for the enzyme in this species is believed to be ubiquinone. Couples the redox reaction to proton translocation (for every two electrons transferred, four hydrogen ions are translocated across the cytoplasmic membrane), and thus conserves the redox ene…
TRINITY_DN10145_c0_g1	400682.PAC_15719417	45.8	8.5e-108	ENOG410XSGG	O	Posttranslational modification, protein turnover, chaperones	protease, serine, 16 (thymus)
TRINITY_DN10148_c0_g2	400682.PAC_15708780	53.1	3.2e-10	ENOG4111HTQ	S	Function unknown	tubulin polyglutamylase complex subunit 2
TRINITY_DN10165_c0_g1	400682.PAC_15712291	69.4	5.1e-30	COG4886	S	Function unknown	leucine Rich Repeat
TRINITY_DN10188_c0_g1	34740.HMEL000047-PA	71.3	1e-35	ENOG4111NJ8	A	RNA processing and modification	serine arginine-rich splicing factor
TRINITY_DN10200_c0_g1	8364.ENSXETP00000024679	58.8	3.5e-106	COG0278	O	Posttranslational modification, protein turnover, chaperones	Glutaredoxin
TRINITY_DN10201_c0_g1	400682.PAC_15718097	52.5	2.9e-87	ENOG410XS2U	O	Posttranslational modification, protein turnover, chaperones	Translocase of outer mitochondrial membrane 40 homolog
TRINITY_DN10201_c0_g2	400682.PAC_15720604	58.3	3.4e-35	COG0203	J	Translation, ribosomal structure and biogenesis	50S ribosomal protein l17
TRINITY_DN10204_c0_g1	8364.ENSXETP00000037784	79.4	1.7e-84	COG1094	S	Function unknown	Required for 40S ribosome biogenesis. Involved in nucleolar processing of pre-18S ribosomal RNA and ribosome assembly (By similarity)
TRINITY_DN10208_c0_g1	400682.PAC_15721227	37.5	1.9e-26	ENOG4110XXW	S	Function unknown	chromosome 12 open reading frame 49
TRINITY_DN10209_c0_g1	400682.PAC_15717588	55.3	2.6e-72	COG0625	O	Posttranslational modification, protein turnover, chaperones	glutathione Stransferase
TRINITY_DN10214_c0_g2	400682.PAC_15705602	60	1e-43	ENOG410YNNH	S	Function unknown	NA
TRINITY_DN10222_c0_g1	400682.PAC_15718232	46.2	1.9e-77	ENOG410XR2J	S	Function unknown	PP2Cc
TRINITY_DN10223_c0_g1	400682.PAC_15727828	39.2	1.4e-22	ENOG410XS5C	S	Function unknown	Zinc finger, ZZ-type with EF-hand domain 1
TRINITY_DN10230_c0_g1	10090.ENSMUSP00000068690	37.2	4.9e-69	COG0204	I	Lipid transport and metabolism	Acyltransferase
TRINITY_DN10241_c0_g1	400682.PAC_15720934	60.4	4.5e-73	ENOG41101CN	F	Nucleotide transport and metabolism	NADH dehydrogenase (Ubiquinone) 1 alpha subcomplex
TRINITY_DN10246_c0_g1	13735.ENSPSIP00000000216	45.2	1.9e-15	ENOG4111YDT	S	Function unknown	NA
TRINITY_DN10252_c0_g1	10090.ENSMUSP00000090910	100	1.6e-37	COG2272	I	Lipid transport and metabolism	Carboxylesterase
TRINITY_DN10253_c0_g1	400682.PAC_15713736	47.7	1.2e-10	COG2801	L	Replication, recombination and repair	Retrotransposon protein
TRINITY_DN10275_c0_g1	10090.ENSMUSP00000080993	91.7	1.5e-259	COG0843	C	Energy production and conversion	Cytochrome C oxidase subunit I
TRINITY_DN10275_c1_g1	9606.ENSP00000354499	90.5	3.8e-64	COG0843	C	Energy production and conversion	Cytochrome C oxidase subunit I
TRINITY_DN10289_c0_g1	400682.PAC_15719882	53.6	1.4e-74	ENOG410XS6P	S	Function unknown	3-oxo-5-alpha-steroid 4-dehydrogenase activity
TRINITY_DN102_c0_g1	400682.PAC_15719419	65.6	5.7e-30	ENOG410YZF1	S	Function unknown	family with sequence similarity 78, member
TRINITY_DN102_c0_g2	400682.PAC_15719419	70.7	5.1e-58	ENOG410YZF1	S	Function unknown	family with sequence similarity 78, member
TRINITY_DN10330_c0_g2	9823.ENSSSCP00000024904	43.6	2.7e-13	COG1818	S	Function unknown	THUMP domain-containing protein
TRINITY_DN10341_c0_g4	7739.JGI127523	57.8	1.2e-26	ENOG411274V	U	Intracellular trafficking, secretion, and vesicular transport	Signal peptidase complex subunit 1 homolog (S. cerevisiae)
TRINITY_DN10347_c0_g1	3847.GLYMA13G35320.1	81.3	1.6e-32	NA	NA	NA	NA
TRINITY_DN10352_c0_g1	400682.PAC_15717991	46.2	2.2e-51	ENOG4110AQ3	S	Function unknown	Tumor protein p63 regulated
TRINITY_DN10369_c0_g1	400682.PAC_15722680	60.3	8e-21	ENOG410XQDH	T	Signal transduction mechanisms	Cyclin-Dependent Kinase
TRINITY_DN10371_c0_g1	9606.ENSP00000251413	82.7	1.6e-217	COG5023	Z	Cytoskeleton	protein polymerization
TRINITY_DN10377_c0_g1	400682.PAC_15726475	57	3.8e-19	ENOG410Y03F	S	Function unknown	NA
TRINITY_DN10380_c0_g1	400682.PAC_15708400	71	1.4e-64	COG0693	S	Function unknown	PfpI family
TRINITY_DN10387_c0_g1	400682.PAC_15714148	59.5	3.3e-42	ENOG410ZYPP	S	Function unknown	NA
TRINITY_DN10394_c0_g1	400682.PAC_15725104	36.8	1.2e-27	ENOG4111IQS	S	Function unknown	transmembrane protein 199
TRINITY_DN10396_c0_g4	9615.ENSCAFP00000042556	40	2.9e-30	COG5059	Z	Cytoskeleton	Kinesin family member
TRINITY_DN10398_c0_g1	3847.GLYMA02G04820.1	50.7	7.6e-10	COG3979	G	Carbohydrate transport and metabolism	chitinase
TRINITY_DN10406_c0_g4	400682.PAC_15710539	43.7	2.7e-07	ENOG4111K0B	K	Transcription	Death-domain associated protein
TRINITY_DN10413_c0_g1	400682.PAC_15728324	63.2	5e-223	ENOG410XQBP	T	Signal transduction mechanisms	Polo-like kinase
TRINITY_DN10420_c0_g1	3847.GLYMA08G18110.1	92.9	3.5e-38	COG0480	J	Translation, ribosomal structure and biogenesis	Catalyzes the GTP-dependent ribosomal translocation step during translation elongation. During this step, the ribosome changes from the pre-translocational (PRE) to the post- translocational (POST) state as the newly formed A-site-bound peptidyl-tRNA and P-site-bound deacylated tRNA move to the P and E sites, respectively. Catalyzes the coordinated movement of the two tRNA molecules, the mRNA and…
TRINITY_DN10430_c0_g1	400682.PAC_15701668	50	2.3e-06	NA	NA	NA	NA
TRINITY_DN10448_c0_g1	400682.PAC_15711068	50	6.3e-10	COG1028	S	Function unknown	Dehydrogenase reductase
TRINITY_DN10458_c0_g1	483219.LILAB_30640	31	2.7e-37	ENOG4111PA6	S	Function unknown	NA
TRINITY_DN10475_c0_g1	3847.GLYMA19G29180.3	98.5	3.3e-26	COG0620	E	Amino acid transport and metabolism	Catalyzes the transfer of a methyl group from 5- methyltetrahydrofolate to homocysteine resulting in methionine formation (By similarity)
TRINITY_DN10475_c0_g4	3694.POPTR_0009s15490.1	91.8	7.3e-32	COG0620	E	Amino acid transport and metabolism	Catalyzes the transfer of a methyl group from 5- methyltetrahydrofolate to homocysteine resulting in methionine formation (By similarity)
TRINITY_DN10487_c0_g2	400682.PAC_15719506	41	6.1e-33	ENOG4111GCB	U	Intracellular trafficking, secretion, and vesicular transport	Signal sequence receptor delta
TRINITY_DN10493_c0_g1	400682.PAC_15726799	38.8	1.1e-101	ENOG410XQ2Q	S	Function unknown	sialic acid-specific 9-O-acetylesterase
TRINITY_DN10494_c0_g1	400682.PAC_15719690	57.1	3.3e-11	COG4995	S	Function unknown	tetratricopeptide repeat domain
TRINITY_DN10502_c0_g1	400682.PAC_15723154	51.6	4.5e-22	ENOG410XS2S	U	Intracellular trafficking, secretion, and vesicular transport	docking protein
TRINITY_DN10512_c0_g1	400682.PAC_15722127	81.7	3.4e-56	COG0096	J	Translation, ribosomal structure and biogenesis	One of the primary rRNA binding proteins, it binds directly to 16S rRNA central domain where it helps coordinate assembly of the platform of the 30S subunit (By similarity)
TRINITY_DN10519_c0_g1	400682.PAC_15717222	75	4.8e-19	COG2058	J	Translation, ribosomal structure and biogenesis	Ribosomal protein
TRINITY_DN10522_c0_g1	45351.NEMVEDRAFT_v1g168735-PA	56	3.7e-93	COG1250	I	Lipid transport and metabolism	Dehydrogenase
TRINITY_DN10524_c0_g2	400682.PAC_15726573	59.4	1.1e-47	COG5059	Z	Cytoskeleton	Kinesin family member
TRINITY_DN10524_c0_g3	7668.SPU_010570tr	32.1	3.2e-36	COG5059	Z	Cytoskeleton	Kinesin family member
TRINITY_DN10564_c0_g1	400682.PAC_15714993	43.2	8.3e-39	COG0526	O	Posttranslational modification, protein turnover, chaperones	Thioredoxin
TRINITY_DN10572_c0_g2	8128.ENSONIP00000026026	56.9	1.2e-18	COG2801	L	Replication, recombination and repair	Retrotransposon protein
TRINITY_DN10579_c0_g1	313606.M23134_06234	36.2	7.5e-34	COG0277	C	Energy production and conversion	FAD linked oxidase domain protein
TRINITY_DN10579_c0_g2	997346.HMPREF9374_0246	28.6	5.5e-19	COG0277	C	Energy production and conversion	FAD linked oxidase domain protein
TRINITY_DN10583_c0_g1	31033.ENSTRUP00000020600	61.7	4.1e-65	COG1949	A	RNA processing and modification	3'-to-5' exoribonuclease specific for small oligoribonucleotides (By similarity)
TRINITY_DN10584_c0_g1	9615.ENSCAFP00000023472	37.1	3.9e-55	ENOG410XQW7	S	Function unknown	PDS5, regulator of cohesion maintenance, homolog
TRINITY_DN10586_c0_g1	45351.NEMVEDRAFT_v1g244907-PA	76.5	5.7e-78	COG1374	J	Translation, ribosomal structure and biogenesis	pre-rRNA processing and 60S ribosome subunit assembly (By similarity)
TRINITY_DN1059_c0_g1	10090.ENSMUSP00000037018	100	1.8e-20	ENOG410ZYS4	S	Function unknown	fibrinogen
TRINITY_DN10609_c0_g1	400682.PAC_15715956	46.6	3.4e-87	COG0103	J	Translation, ribosomal structure and biogenesis	30S ribosomal protein S9
TRINITY_DN10615_c0_g1	3847.GLYMA13G31060.1	88.2	9.2e-21	ENOG410YV4V	S	Function unknown	Auxin-repressed 12.5 kDa
TRINITY_DN10620_c0_g1	3847.GLYMA06G45950.1	97.5	1.3e-107	COG2224	C	Energy production and conversion	Isocitrate lyase
TRINITY_DN10623_c0_g1	7739.JGI268698	54	7.7e-68	ENOG4111HNA	O	Posttranslational modification, protein turnover, chaperones	ubiquitin carboxyl-terminal
TRINITY_DN10631_c0_g1	7739.JGI212933	67.2	4.7e-36	ENOG4111RVM	S	Function unknown	Tctex1 domain containing
TRINITY_DN10637_c0_g1	400682.PAC_15727701	40.9	6.1e-12	NA	NA	NA	NA
TRINITY_DN10640_c0_g1	400682.PAC_15709803	36.5	2.3e-82	ENOG410ZAI8	O	Posttranslational modification, protein turnover, chaperones	Oxidative stress induced growth inhibitor
TRINITY_DN10645_c0_g1	45351.NEMVEDRAFT_v1g245816-PA	48.5	1.8e-11	ENOG4111NW7	U	Intracellular trafficking, secretion, and vesicular transport	translocase of inner mitochondrial membrane 21 homolog (yeast)
TRINITY_DN10646_c0_g1	400682.PAC_15723645	63.6	5e-36	ENOG4111KIB	U	Intracellular trafficking, secretion, and vesicular transport	NADH dehydrogenase (Ubiquinone) 1 alpha subcomplex
TRINITY_DN10649_c0_g1	400682.PAC_15726275	43.7	9e-137	ENOG4111J0Y	S	Function unknown	NA
TRINITY_DN10656_c0_g1	400682.PAC_15715349	79.5	1.4e-128	COG0214	H	Coenzyme transport and metabolism	Involved in the production of pyridoxal phosphate, probably by incorporating ammonia into the pyridine ring (By similarity)
TRINITY_DN10657_c0_g1	400682.PAC_15719002	86.6	1.2e-58	ENOG410Z0ZF	K	Transcription	ets variant
TRINITY_DN10658_c0_g1	6085.XP_002163471	70.3	3.4e-96	COG1358	J	Translation, ribosomal structure and biogenesis	(ribosomal) protein
TRINITY_DN10661_c0_g2	45351.NEMVEDRAFT_v1g113902-PA	64.4	2.2e-58	COG1196	D	Cell cycle control, cell division, chromosome partitioning	Required for chromosome condensation and partitioning (By similarity)
TRINITY_DN10669_c0_g1	400682.PAC_15725510	53	1e-190	COG1501	G	Carbohydrate transport and metabolism	hydrolase, family 31
TRINITY_DN1066_c0_g1	400682.PAC_15718356	40.7	6.7e-51	ENOG4111U1K	B	Chromatin structure and dynamics	SRY (Sex determining region Y)-box
TRINITY_DN10671_c0_g1	3702.AT5G03860.1	100	3.8e-36	COG2225	C	Energy production and conversion	malate synthase
TRINITY_DN10671_c0_g2	3847.GLYMA17G13730.1	92.3	1.5e-82	COG2225	C	Energy production and conversion	malate synthase
TRINITY_DN10672_c0_g1	7719.ENSCINP00000022203	53.9	2.1e-18	ENOG4111N8Y	S	Function unknown	serine arginine-rich splicing factor
TRINITY_DN10674_c0_g1	400682.PAC_15715244	72.5	1.5e-194	ENOG410XNTI	L	Replication, recombination and repair	purine NTP-dependent helicase activity
TRINITY_DN10697_c0_g2	3847.GLYMA03G34830.1	96.9	2.5e-27	COG0148	G	Carbohydrate transport and metabolism	Catalyzes the reversible conversion of 2- phosphoglycerate into phosphoenolpyruvate. It is essential for the degradation of carbohydrates via glycolysis (By similarity)
TRINITY_DN10711_c0_g1	4081.Solyc06g076020.2.1	98.5	2.5e-31	COG0443	O	Posttranslational modification, protein turnover, chaperones	Heat shock protein
TRINITY_DN10711_c0_g3	4081.Solyc09g010630.2.1	100	1.8e-29	COG0443	O	Posttranslational modification, protein turnover, chaperones	Heat shock protein
TRINITY_DN10718_c0_g1	8083.ENSXMAP00000006923	71.2	1.5e-188	ENOG410XQJF	A	RNA processing and modification	crooked neck pre-mRNA splicing factor-like 1 (Drosophila)
TRINITY_DN10724_c0_g2	400682.PAC_15719886	51.1	8.6e-91	COG0330	O	Posttranslational modification, protein turnover, chaperones	Band 7 protein
TRINITY_DN10726_c0_g1	45351.NEMVEDRAFT_v1g237573-PA	70.6	4.5e-104	ENOG410XS86	S	Function unknown	Solute carrier family 25
TRINITY_DN10729_c0_g1	7739.JGI125947	38.8	1.7e-69	COG0671	I	Lipid transport and metabolism	PHOsphatase
TRINITY_DN10730_c0_g2	7739.JGI108985	55.7	3.2e-16	ENOG410YBT6	S	Function unknown	NA
TRINITY_DN10734_c0_g1	3847.GLYMA09G04530.1	60.6	7e-44	NA	NA	NA	NA
TRINITY_DN1073_c0_g1	436017.A4RZY0	29.9	8.1e-26	ENOG4111H56	S	Function unknown	Sulfotransferase
TRINITY_DN10741_c0_g1	45351.NEMVEDRAFT_v1g245582-PA	66.3	4.2e-29	ENOG4111NPF	S	Function unknown	enkurin domain containing 1
TRINITY_DN10755_c0_g1	400682.PAC_15705644	79.7	7.4e-27	ENOG4112243	S	Function unknown	Transmembrane protein 167A
TRINITY_DN10759_c0_g2	400682.PAC_15728333	99	8.2e-49	COG5262	B	Chromatin structure and dynamics	histone h2a
TRINITY_DN10762_c0_g1	7668.SPU_006599tr	46.6	4.6e-56	COG5387	O	Posttranslational modification, protein turnover, chaperones	ATP synthase mitochondrial F1 complex assembly factor
TRINITY_DN10768_c0_g1	10228.TriadP63207	63.8	4.8e-138	COG0625	O	Posttranslational modification, protein turnover, chaperones	glutathione Stransferase
TRINITY_DN10785_c0_g1	7897.ENSLACP00000016278	25.1	4.9e-06	ENOG410XPEG	U	Intracellular trafficking, secretion, and vesicular transport	laminin beta
TRINITY_DN10791_c0_g1	7668.SPU_024760tr	40.8	5e-07	COG2801	L	Replication, recombination and repair	Retrotransposon protein
TRINITY_DN10794_c0_g1	54126.PPA27148	39.1	1.6e-06	ENOG410XR6Z	S	Function unknown	Guanylate binding protein
TRINITY_DN10795_c0_g1	431895.XP_001743546.1	52.5	3e-65	ENOG410XQAD	S	Function unknown	Coronin, actin binding protein
TRINITY_DN10804_c0_g1	400682.PAC_15727849	53.1	7.1e-149	ENOG410XQEX	S	Function unknown	tHO complex
TRINITY_DN10810_c0_g1	400682.PAC_15717215	54.2	7.5e-81	COG0491	S	Function unknown	Beta-lactamase domain protein
TRINITY_DN10820_c0_g1	28377.ENSACAP00000007256	50	9.2e-48	ENOG410XQMT	S	Function unknown	Transmembrane protein 19
TRINITY_DN10829_c0_g1	543728.Vapar_4875	97.7	2.4e-37	COG0636	C	Energy production and conversion	F(1)F(0) ATP synthase produces ATP from ADP in the presence of a proton or sodium gradient. F-type ATPases consist of two structural domains, F(1) containing the extramembraneous catalytic core and F(0) containing the membrane proton channel, linked together by a central stalk and a peripheral stalk. During catalysis, ATP synthesis in the catalytic domain of F(1) is coupled via a rotary mechanism…
TRINITY_DN10830_c0_g1	400682.PAC_15724886	45.1	2.2e-34	ENOG410XSP5	G	Carbohydrate transport and metabolism	Major Facilitator superfamily
TRINITY_DN10830_c0_g2	400682.PAC_15724886	49.6	8.8e-70	ENOG410XSP5	G	Carbohydrate transport and metabolism	Major Facilitator superfamily
TRINITY_DN10833_c0_g1	400682.PAC_15726537	84.5	4.2e-43	COG1631	J	Translation, ribosomal structure and biogenesis	Ribosomal protein
TRINITY_DN10852_c0_g3	45351.NEMVEDRAFT_v1g186353-PA	64.3	4.3e-39	COG0355	C	Energy production and conversion	Produces ATP from ADP in the presence of a proton gradient across the membrane (By similarity)
TRINITY_DN10859_c0_g1	400682.PAC_15728023	51.3	5.9e-12	COG0130	J	Translation, ribosomal structure and biogenesis	Responsible for synthesis of pseudouridine from uracil- 55 in the psi GC loop of transfer RNAs (By similarity)
TRINITY_DN10862_c0_g2	8090.ENSORLP00000008520	63.9	6.7e-113	ENOG410XPEV	S	Function unknown	cleft lip and palate
TRINITY_DN10862_c0_g3	400682.PAC_15719691	46.3	3.8e-64	ENOG410XPEV	S	Function unknown	cleft lip and palate
TRINITY_DN10864_c0_g1	45351.NEMVEDRAFT_v1g159435-PA	37.4	1.3e-72	ENOG410XRI4	S	Function unknown	programmed cell death
TRINITY_DN10868_c0_g1	3055.EDP09408	89.4	5.1e-37	COG0098	J	Translation, ribosomal structure and biogenesis	Located at the back of the 30S subunit body where it stabilizes the conformation of the head with respect to the body (By similarity)
TRINITY_DN10876_c0_g2	59689.fgenesh2_kg.3__2967__ATMG00900.1	84	3.5e-37	COG0755	O	Posttranslational modification, protein turnover, chaperones	cytochrome c
TRINITY_DN10884_c0_g1	45351.NEMVEDRAFT_v1g195293-PA	62.1	1.9e-137	COG4886	S	Function unknown	leucine Rich Repeat
TRINITY_DN10884_c0_g1	45351.NEMVEDRAFT_v1g195293-PA	62.1	1.9e-137	COG5239	A	RNA processing and modification	Ccr4-NOT transcription complex, subunit
TRINITY_DN10895_c0_g1	400682.PAC_15721674	34.3	4e-06	NA	NA	NA	NA
TRINITY_DN108_c0_g1	7260.FBpp0241133	43.1	4.7e-09	ENOG410XPKI	S	Function unknown	sex comb on
TRINITY_DN10912_c0_g3	7739.JGI284535	55.4	2.2e-45	COG0484	O	Posttranslational modification, protein turnover, chaperones	ATP binding to DnaK triggers the release of the substrate protein, thus completing the reaction cycle. Several rounds of ATP-dependent interactions between DnaJ, DnaK and GrpE are required for fully efficient folding. Also involved, together with DnaK and GrpE, in the DNA replication of plasmids through activation of initiation proteins (By similarity)
TRINITY_DN10921_c0_g1	7739.JGI259979	78.3	9.5e-72	COG5078	O	Posttranslational modification, protein turnover, chaperones	ubiquitin-conjugating enzyme
TRINITY_DN10940_c0_g1	400682.PAC_15720837	49.3	1.9e-06	ENOG410Y03F	S	Function unknown	NA
TRINITY_DN10945_c0_g1	6669.DappuP93662	35.8	9.1e-10	ENOG4111I8D	P	Inorganic ion transport and metabolism	Solute carrier family 31 copper transporters member
TRINITY_DN10954_c0_g1	400682.PAC_15724127	40.6	3.1e-26	ENOG41123DQ	S	Function unknown	testis, prostate and placenta expressed
TRINITY_DN10961_c0_g1	7739.JGI57176	77.4	6.8e-41	ENOG4111N70	S	Function unknown	syndrome nuclear autoantigen 1
TRINITY_DN10961_c0_g2	400682.PAC_15724247	51.1	6.1e-81	COG2423	E	Amino acid transport and metabolism	Ornithine Cyclodeaminase
TRINITY_DN10969_c0_g2	400682.PAC_15706749	51.9	9.8e-08	ENOG4111JB0	S	Function unknown	NA
TRINITY_DN10972_c0_g1	6945.ISCW005845-PA	59.8	7.9e-22	COG0424	D	Cell cycle control, cell division, chromosome partitioning	Maf-like protein
TRINITY_DN10973_c0_g2	666681.M301_2073	45.9	1e-20	COG5429	S	Function unknown	secreted protein
TRINITY_DN10975_c1_g1	400682.PAC_15716960	77.4	5.5e-118	ENOG410XNW0	U	Intracellular trafficking, secretion, and vesicular transport	transmembrane transport
TRINITY_DN10977_c0_g1	3847.GLYMA20G25920.1	92.1	1.8e-40	COG0055	C	Energy production and conversion	Produces ATP from ADP in the presence of a proton gradient across the membrane. The catalytic sites are hosted primarily by the beta subunits (By similarity)
TRINITY_DN10978_c0_g1	400682.PAC_15717457	38.4	1.4e-22	ENOG4111SSC	U	Intracellular trafficking, secretion, and vesicular transport	phosphatidylglycerol phosphatidylinositol transfer protein
TRINITY_DN1097_c0_g1	400682.PAC_15721544	38.8	6.2e-66	COG0596	S	Function unknown	Alpha beta hydrolase
TRINITY_DN10980_c0_g1	400682.PAC_15724546	42.2	1.4e-08	ENOG410Y91E	S	Function unknown	NA
TRINITY_DN10982_c0_g1	3694.POPTR_0011s13820.1	95.1	6.4e-50	COG1635	H	Coenzyme transport and metabolism	Involved in biosynthesis of the thiamine precursor thiazole. Catalyzes the conversion of NAD and glycine to adenosine diphosphate 5-(2-hydroxyethyl)-4-methylthiazole-2-carboxylic acid (ADT), an adenylated thiazole intermediate. The reaction includes an iron-dependent sulfide transfer from a conserved cysteine residue of the protein to a thiazole intermediate. The enzyme can only undergo a single …
TRINITY_DN10985_c0_g1	400682.PAC_15722453	68.4	5.1e-07	ENOG41114B8	B	Chromatin structure and dynamics	SRY (sex determining region Y)-box 17
TRINITY_DN10987_c0_g1	10020.ENSDORP00000002353	82.8	2.5e-65	COG0184	J	Translation, ribosomal structure and biogenesis	Forms an intersubunit bridge (bridge B4) with the 23S rRNA of the 50S subunit in the ribosome (By similarity)
TRINITY_DN11013_c0_g1	400682.PAC_15721440	41.6	1.8e-06	NA	NA	NA	NA
TRINITY_DN11019_c0_g1	400682.PAC_15718717	96.5	2.2e-67	COG2036	B	Chromatin structure and dynamics	Core component of nucleosome. Nucleosomes wrap and compact DNA into chromatin, limiting DNA accessibility to the cellular machineries which require DNA as a template. Histones thereby play a central role in transcription regulation, DNA repair, DNA replication and chromosomal stability. DNA accessibility is regulated via a complex set of post-translational modifications of histones, also called h…
TRINITY_DN11026_c0_g1	69293.ENSGACP00000018748	52.4	1.2e-46	COG1100	S	Function unknown	GTP-binding Protein
TRINITY_DN11031_c0_g2	45351.NEMVEDRAFT_v1g111004-PA	49.7	1.2e-29	ENOG4111T47	S	Function unknown	transmembrane protein 17
TRINITY_DN11059_c0_g1	3847.GLYMA04G07360.1	92.4	2.4e-27	ENOG410XNRS	S	Function unknown	GTP-binding nuclear protein
TRINITY_DN1105_c0_g2	400682.PAC_15728582	60.2	3.1e-35	COG1100	S	Function unknown	GTP-binding Protein
TRINITY_DN11071_c0_g1	400682.PAC_15712946	36.2	9.6e-48	ENOG410XQKD	S	Function unknown	pectinacetylesterase
TRINITY_DN11073_c1_g1	400682.PAC_15724060	50.4	7.2e-28	ENOG4111NAH	U	Intracellular trafficking, secretion, and vesicular transport	Translocase of outer mitochondrial membrane 20 homolog
TRINITY_DN11092_c0_g1	400682.PAC_15712347	58	2.2e-57	ENOG4111KN4	A	RNA processing and modification	Tumor necrosis factor alpha-induced protein
TRINITY_DN11101_c0_g1	9646.ENSAMEP00000005544	69.5	8.9e-62	COG0456	S	Function unknown	acetyltransferase
TRINITY_DN11108_c0_g1	400682.PAC_15723746	37	1.5e-20	COG1100	S	Function unknown	GTP-binding Protein
TRINITY_DN11112_c0_g1	3847.GLYMA19G41120.1	95.8	9e-35	COG4870	O	Posttranslational modification, protein turnover, chaperones	cathepsin
TRINITY_DN11114_c0_g2	400682.PAC_15726920	72.2	1.2e-25	COG2092	J	Translation, ribosomal structure and biogenesis	Promotes the exchange of GDP for GTP in EF-1-alpha GDP, thus allowing the regeneration of EF-1-alpha GTP that could then be used to form the ternary complex EF-1-alpha GTP AAtRNA (By similarity)
TRINITY_DN11114_c0_g3	400682.PAC_15726920	76.4	5.1e-41	COG2092	J	Translation, ribosomal structure and biogenesis	Promotes the exchange of GDP for GTP in EF-1-alpha GDP, thus allowing the regeneration of EF-1-alpha GTP that could then be used to form the ternary complex EF-1-alpha GTP AAtRNA (By similarity)
TRINITY_DN11114_c0_g5	7757.ENSPMAP00000007200	46.8	1.5e-21	ENOG410ZPJ1	S	Function unknown	NA
TRINITY_DN11137_c0_g1	10228.TriadP54786	29.7	5.9e-24	ENOG410XSXF	O	Posttranslational modification, protein turnover, chaperones	mitochondrial carrier
TRINITY_DN11155_c0_g1	7757.ENSPMAP00000000783	98.5	1.6e-73	ENOG410XS39	S	Function unknown	Chromosome 16 open reading frame 80
TRINITY_DN11161_c0_g1	400682.PAC_15713235	59.9	7.7e-134	COG0241	E	Amino acid transport and metabolism	histidinol-phosphatase activity
TRINITY_DN11164_c0_g3	45351.NEMVEDRAFT_v1g194235-PA	82.8	5.4e-95	COG1632	J	Translation, ribosomal structure and biogenesis	Ribosomal protein L15
TRINITY_DN11164_c0_g4	400682.PAC_15724071	37.4	2e-72	ENOG410YE1U	P	Inorganic ion transport and metabolism	solute carrier family 52, riboflavin transporter, member
TRINITY_DN11169_c0_g1	987059.RBXJA2T_12657	92.2	1.2e-36	COG1185	J	Translation, ribosomal structure and biogenesis	Involved in mRNA degradation. Hydrolyzes single-stranded polyribonucleotides processively in the 3'- to 5'-direction (By similarity)
TRINITY_DN11171_c0_g1	8364.ENSXETP00000053273	50	4.4e-13	ENOG41122UH	S	Function unknown	dolichyl-phosphate beta-D-mannosyltransferase activity
TRINITY_DN11206_c0_g1	400682.PAC_15716384	35.5	1.9e-99	COG2132	Q	Secondary metabolites biosynthesis, transport and catabolism	Multicopper oxidase
TRINITY_DN11207_c0_g1	6669.DappuP231190	61.8	1.7e-30	ENOG410XNZV	S	Function unknown	member RAS oncogene family
TRINITY_DN11224_c0_g1	8049.ENSGMOP00000020088	32.5	8.5e-25	COG0330	O	Posttranslational modification, protein turnover, chaperones	Band 7 protein
TRINITY_DN11232_c0_g1	400682.PAC_15721378	25.6	2.6e-11	ENOG4111WNH	O	Posttranslational modification, protein turnover, chaperones	BCL-2-associated athanogene
TRINITY_DN11241_c0_g1	400682.PAC_15706083	50	3.7e-10	NA	NA	NA	NA
TRINITY_DN11250_c0_g1	6085.XP_002155721	52.8	4.2e-34	ENOG4111Q2V	O	Posttranslational modification, protein turnover, chaperones	Thioredoxin domain containing 17
TRINITY_DN11251_c0_g1	400682.PAC_15719792	65.7	4.5e-141	ENOG410XSZD	K	Transcription	SWI SNF related matrix associated actin dependent regulator of chromatin subfamily B member 1
TRINITY_DN11283_c0_g1	400682.PAC_15722367	62.6	8.3e-65	ENOG410XT4J	S	Function unknown	potassium channel tetramerisation domain containing
TRINITY_DN11287_c0_g1	9315.ENSMEUP00000009929	44.4	1.7e-13	ENOG4112ADM	J	Translation, ribosomal structure and biogenesis	Ribonuclease P MRP 14kDa subunit
TRINITY_DN11289_c0_g1	400682.PAC_15716678	68.8	8.1e-40	ENOG410ZE7H	S	Function unknown	Spermatogenesis associated 4
TRINITY_DN11296_c0_g1	400682.PAC_15728207	53.7	7.6e-13	ENOG410ZR9A	S	Function unknown	Deoxyribonuclease
TRINITY_DN11307_c0_g2	420662.Mpe_A0195	92.7	2.7e-35	COG0056	C	Energy production and conversion	Produces ATP from ADP in the presence of a proton gradient across the membrane. The alpha chain is a regulatory subunit (By similarity)
TRINITY_DN11309_c0_g1	3847.GLYMA04G40470.1	93.3	1.9e-49	COG0097	J	Translation, ribosomal structure and biogenesis	This protein binds to the 23S rRNA, and is important in its secondary structure. It is located near the subunit interface in the base of the L7 L12 stalk, and near the tRNA binding site of the peptidyltransferase center (By similarity)
TRINITY_DN11311_c0_g2	400682.PAC_15724447	47.3	2.8e-59	COG5184	D	Cell cycle control, cell division, chromosome partitioning	regulator of chromosome condensation
TRINITY_DN11311_c0_g2	400682.PAC_15724447	47.3	2.8e-59	COG5184	Z	Cytoskeleton	regulator of chromosome condensation
TRINITY_DN11311_c0_g5	30608.ENSMICP00000006568	35.7	4.2e-16	COG5021	O	Posttranslational modification, protein turnover, chaperones	ubiquitin protein ligase
TRINITY_DN11311_c0_g5	30608.ENSMICP00000006568	35.7	4.2e-16	COG5184	D	Cell cycle control, cell division, chromosome partitioning	regulator of chromosome condensation
TRINITY_DN11311_c0_g5	30608.ENSMICP00000006568	35.7	4.2e-16	COG5184	Z	Cytoskeleton	regulator of chromosome condensation
TRINITY_DN11338_c2_g1	400682.PAC_15723182	48.6	6.7e-11	ENOG410XSB6	S	Function unknown	calcyclin binding protein
TRINITY_DN11344_c0_g1	400682.PAC_15713756	69.7	1.8e-213	COG0443	O	Posttranslational modification, protein turnover, chaperones	Heat shock protein
TRINITY_DN11353_c1_g1	4641.GSMUA_Achr4P08430_001	100	2.1e-31	COG5078	O	Posttranslational modification, protein turnover, chaperones	ubiquitin-conjugating enzyme
TRINITY_DN11353_c1_g2	4513.MLOC_41497.1	96.7	1.4e-27	COG5078	O	Posttranslational modification, protein turnover, chaperones	ubiquitin-conjugating enzyme
TRINITY_DN11354_c1_g1	9615.ENSCAFP00000029028	59	4.9e-46	ENOG410ZACM	S	Function unknown	jumonji domain containing
TRINITY_DN11369_c0_g1	400682.PAC_15713506	55.4	3.6e-58	ENOG410YFEA	U	Intracellular trafficking, secretion, and vesicular transport	glycolipid transport
TRINITY_DN11370_c0_g1	400682.PAC_15716453	41.5	1.6e-55	ENOG410XR89	S	Function unknown	dopamine beta-hydroxylase (dopamine beta-monooxygenase)
TRINITY_DN11373_c0_g1	400682.PAC_15727024	48.9	1.2e-85	COG2453	T	Signal transduction mechanisms	dual specificity phosphatase
TRINITY_DN11376_c0_g1	431895.XP_001747935.1	25.5	5.4e-92	ENOG4111GEQ	S	Function unknown	leukocyte receptor cluster (LRC) member 9
TRINITY_DN11378_c0_g1	400682.PAC_15716976	55.3	2.9e-22	ENOG4112D7R	S	Function unknown	NA
TRINITY_DN11379_c0_g1	290400.Jann_3769	31.7	2.3e-60	COG0654	C	Energy production and conversion	oxidoreductase activity, acting on paired donors, with incorporation or reduction of molecular oxygen, NAD(P)H as one donor, and incorporation of one atom of oxygen
TRINITY_DN11379_c0_g1	290400.Jann_3769	31.7	2.3e-60	COG0654	H	Coenzyme transport and metabolism	oxidoreductase activity, acting on paired donors, with incorporation or reduction of molecular oxygen, NAD(P)H as one donor, and incorporation of one atom of oxygen
TRINITY_DN11379_c0_g2	59729.ENSTGUP00000012553	37.8	3.9e-14	COG0604	C	Energy production and conversion	alcohol dehydrogenase
TRINITY_DN1137_c0_g1	400682.PAC_15717217	47.5	8.4e-35	ENOG410XTFH	S	Function unknown	Exostosin
TRINITY_DN11385_c0_g1	400682.PAC_15726022	50.1	4.7e-90	COG4870	O	Posttranslational modification, protein turnover, chaperones	cathepsin
TRINITY_DN11391_c0_g1	400682.PAC_15713330	57.5	1.1e-96	ENOG410XPHY	S	Function unknown	growth hormone inducible transmembrane protein
TRINITY_DN11394_c0_g1	400682.PAC_15725886	52.4	2.4e-11	ENOG410Y5P5	C	Energy production and conversion	Mitochondrial membrane ATP synthase (F(1)F(0) ATP synthase or Complex V) produces ATP from ADP in the presence of a proton gradient across the membrane which is generated by electron transport complexes of the respiratory chain. F-type ATPases consist of two structural domains, F(1) - containing the extramembraneous catalytic core, and F(0) - containing the membrane proton channel, linked togethe…
TRINITY_DN11394_c0_g2	8083.ENSXMAP00000006291	37.8	1.1e-15	ENOG41126B7	O	Posttranslational modification, protein turnover, chaperones	proteasome (prosome, macropain) assembly chaperone 4
TRINITY_DN11396_c0_g1	400682.PAC_15699424	85.5	5.6e-28	COG1358	J	Translation, ribosomal structure and biogenesis	(ribosomal) protein
TRINITY_DN11399_c0_g2	400682.PAC_15719841	63.5	0	COG5657	O	Posttranslational modification, protein turnover, chaperones	Importin
TRINITY_DN11404_c0_g1	400682.PAC_15724448	66.4	3.7e-44	COG0051	J	Translation, ribosomal structure and biogenesis	tRNA binding
TRINITY_DN11406_c1_g1	7739.JGI190826	54.9	1.4e-08	ENOG41127T6	O	Posttranslational modification, protein turnover, chaperones	Migration and invasion enhancer 1
TRINITY_DN11424_c0_g1	400682.PAC_15724445	37.9	1.6e-105	COG5076	B	Chromatin structure and dynamics	bromodomain
TRINITY_DN11424_c0_g1	400682.PAC_15724445	37.9	1.6e-105	COG5076	K	Transcription	bromodomain
TRINITY_DN11429_c0_g1	9739.ENSTTRP00000010518	52.1	2.8e-15	ENOG410XRI7	T	Signal transduction mechanisms	Phosphodiesterase
TRINITY_DN11429_c1_g1	400682.PAC_15714977	35.6	8.2e-13	ENOG41116TH	S	Function unknown	NA
TRINITY_DN11432_c1_g1	10090.ENSMUSP00000044570	44.1	2.6e-06	ENOG41125BG	S	Function unknown	R3H domain containing 4
TRINITY_DN11442_c0_g1	400682.PAC_15713255	39.1	2e-52	ENOG410XSWP	S	Function unknown	Nipsnap homolog
TRINITY_DN11450_c0_g1	400682.PAC_15719743	32.4	3e-25	ENOG4111W33	S	Function unknown	NAD+ nucleosidase activity
TRINITY_DN11454_c0_g1	7739.JGI124822	31	4e-45	ENOG4111JNS	S	Function unknown	NA
TRINITY_DN11461_c0_g1	45351.NEMVEDRAFT_v1g239337-PA	50	3.4e-15	ENOG4111TUG	S	Function unknown	CGRP receptor component
TRINITY_DN11468_c0_g1	400682.PAC_15707310	39.1	1.6e-28	ENOG41112UB	S	Function unknown	NA
TRINITY_DN11468_c0_g2	400682.PAC_15726187	35.3	4.9e-53	ENOG4111FMP	S	Function unknown	activating signal cointegrator 1 complex subunit
TRINITY_DN11470_c0_g1	7668.SPU_011611tr	40.5	5.8e-07	ENOG4111F4M	S	Function unknown	Reverse transcriptase (RNA-dependent DNA polymerase)
TRINITY_DN11471_c0_g1	7897.ENSLACP00000016861	23.4	7.9e-24	ENOG410Z9MF	S	Function unknown	tripartite motif containing 45
TRINITY_DN11474_c0_g2	13616.ENSMODP00000034477	26.1	2.4e-06	ENOG4111G4Z	S	Function unknown	complement component 1, q subcomponent binding protein
TRINITY_DN11478_c0_g2	400682.PAC_15728369	22.9	1.6e-15	ENOG410Z7WB	S	Function unknown	NA
TRINITY_DN11480_c0_g1	400682.PAC_15725356	73.2	4.4e-09	ENOG410YNRJ	S	Function unknown	NA
TRINITY_DN11484_c0_g1	400682.PAC_15725390	47.6	8.3e-44	ENOG4111F9I	K	Transcription	Transcriptional adaptor 1
TRINITY_DN11487_c0_g3	400682.PAC_15711738	40.9	2.9e-85	COG0072	J	Translation, ribosomal structure and biogenesis	phenylalanyl-tRNA synthetase (beta subunit)
TRINITY_DN11491_c0_g1	45351.NEMVEDRAFT_v1g92762-PA	48	1.3e-83	COG2515	E	Amino acid transport and metabolism	1-aminocyclopropane-1-carboxylate deaminase
TRINITY_DN11505_c0_g1	9606.ENSP00000354499	94.3	1.9e-29	COG0843	C	Energy production and conversion	Cytochrome C oxidase subunit I
TRINITY_DN11506_c0_g1	400682.PAC_15721656	74.8	8.8e-105	ENOG410XNNW	S	Function unknown	Dehydrogenase
TRINITY_DN11521_c0_g1	400682.PAC_15728543	55.5	2.6e-102	COG0846	K	Transcription	NAD-dependent protein deacetylase which modulates the activities of several enzymes which are inactive in their acetylated form
TRINITY_DN11527_c0_g3	400682.PAC_15707310	45	3.6e-24	ENOG41112UB	S	Function unknown	NA
TRINITY_DN11540_c0_g1	3847.GLYMA19G32250.1	61.8	1.9e-08	NA	NA	NA	NA
TRINITY_DN11551_c0_g1	6669.DappuP231265	67.2	1.6e-41	COG0251	J	Translation, ribosomal structure and biogenesis	Endoribonuclease LPSP
TRINITY_DN11554_c0_g1	400682.PAC_15706976	66.1	1.6e-56	ENOG410ZKGU	S	Function unknown	NA
TRINITY_DN11555_c0_g3	9606.ENSP00000354813	97.2	3.9e-28	COG1009	C	Energy production and conversion	subunit l
TRINITY_DN11555_c0_g5	9606.ENSP00000354665	98	1.5e-71	ENOG410YP23	C	Energy production and conversion	Core subunit of the mitochondrial membrane respiratory chain NADH dehydrogenase (Complex I) that is believed to belong to the minimal assembly required for catalysis. Complex I functions in the transfer of electrons from NADH to the respiratory chain. The immediate electron acceptor for the enzyme is believed to be ubiquinone
TRINITY_DN11555_c0_g6	10090.ENSMUSP00000081003	92.7	5.2e-187	COG1290	C	Energy production and conversion	Component of the ubiquinol-cytochrome c reductase complex (complex III or cytochrome b-c1 complex), which is a respiratory chain that generates an electrochemical potential coupled to ATP synthesis (By similarity)
TRINITY_DN11561_c0_g2	400682.PAC_15716412	50	1.5e-19	ENOG410XSTS	K	Transcription	t-box transcription factor
TRINITY_DN11565_c0_g1	400682.PAC_15700271	58.1	2.7e-14	ENOG410Y5C6	K	Transcription	e3 ubiquitin protein ligase
TRINITY_DN11583_c0_g1	400682.PAC_15722120	72.3	4.8e-45	COG1594	K	Transcription	DNA-dependent RNA polymerase catalyzes the transcription of DNA into RNA using the four ribonucleoside triphosphates as substrates (By similarity)
TRINITY_DN11591_c0_g2	7739.JGI114927	83.4	1.1e-69	COG0099	J	Translation, ribosomal structure and biogenesis	Located at the top of the head of the 30S subunit, it contacts several helices of the 16S rRNA. In the 70S ribosome it contacts the 23S rRNA (bridge B1a) and protein L5 of the 50S subunit (bridge B1b), connecting the 2 subunits
TRINITY_DN11592_c0_g1	400682.PAC_15726521	54	6.9e-83	COG0081	J	Translation, ribosomal structure and biogenesis	Binds directly to 23S rRNA. The L1 stalk is quite mobile in the ribosome, and is involved in E site tRNA release (By similarity)
TRINITY_DN11593_c0_g1	13735.ENSPSIP00000017066	41.4	3.3e-21	ENOG4111NE1	S	Function unknown	Surfeit 2
TRINITY_DN1160_c0_g1	10090.ENSMUSP00000096458	100	2.2e-37	ENOG410Y9IX	Z	Cytoskeleton	Troponin I type
TRINITY_DN11620_c0_g1	45351.NEMVEDRAFT_v1g238127-PA	22.3	1.1e-29	ENOG410XQSU	O	Posttranslational modification, protein turnover, chaperones	tripartite motif containing 2
TRINITY_DN11624_c0_g1	400682.PAC_15723879	66.7	5.9e-08	ENOG41129KR	S	Function unknown	NA
TRINITY_DN11626_c0_g1	9031.ENSGALP00000019039	65.7	3.5e-84	COG0605	P	Inorganic ion transport and metabolism	Destroys radicals which are normally produced within the cells and which are toxic to biological systems (By similarity)
TRINITY_DN11628_c0_g2	45351.NEMVEDRAFT_v1g162224-PA	76.3	4.3e-60	COG0091	J	Translation, ribosomal structure and biogenesis	The globular domain of the protein is located near the polypeptide exit tunnel on the outside of the subunit, while an extended beta-hairpin is found that lines the wall of the exit tunnel in the center of the 70S ribosome (By similarity)
TRINITY_DN11630_c0_g1	400682.PAC_15710493	55.6	8.5e-31	COG2075	J	Translation, ribosomal structure and biogenesis	Ribosomal protein
TRINITY_DN11630_c0_g2	400682.PAC_15725056	64.4	7.7e-69	ENOG410XQV9	A	RNA processing and modification	Pleiotropic regulator 1
TRINITY_DN11631_c0_g1	7668.SPU_018062tr	51.7	9.2e-65	COG1310	S	Function unknown	Component of the eukaryotic translation initiation factor 3 (eIF-3) complex, which is involved in protein synthesis and, together with other initiation factors, stimulates binding of mRNA and methionyl-tRNAi to the 40S ribosome (By similarity)
TRINITY_DN11632_c0_g1	9031.ENSGALP00000005322	70.6	3e-58	COG5154	J	Translation, ribosomal structure and biogenesis	ribosome biogenesis protein brx1
TRINITY_DN11648_c0_g1	400682.PAC_15715843	75.3	6.1e-34	COG5227	O	Posttranslational modification, protein turnover, chaperones	smt3 suppressor of mif two 3 homolog
TRINITY_DN11648_c0_g2	8128.ENSONIP00000020702	52.9	1.2e-21	COG0091	J	Translation, ribosomal structure and biogenesis	The globular domain of the protein is located near the polypeptide exit tunnel on the outside of the subunit, while an extended beta-hairpin is found that lines the wall of the exit tunnel in the center of the 70S ribosome (By similarity)
TRINITY_DN11651_c0_g1	400682.PAC_15722356	78.5	5.7e-41	ENOG410YAUW	O	Posttranslational modification, protein turnover, chaperones	heme lyase
TRINITY_DN11652_c0_g2	400682.PAC_15719950	52.3	2e-43	COG2608	S	Function unknown	heavy metal transport detoxification protein
TRINITY_DN11660_c0_g1	400682.PAC_15724358	61.7	1.6e-38	ENOG410YN2V	S	Function unknown	WAS protein family homolog
TRINITY_DN11660_c0_g3	400682.PAC_15724358	63	6.9e-33	ENOG410YN2V	S	Function unknown	WAS protein family homolog
TRINITY_DN11662_c0_g1	400682.PAC_15717460	53.8	1.6e-09	ENOG410XQKW	J	Translation, ribosomal structure and biogenesis	CBP80 20-dependent translation initiation factor
TRINITY_DN11662_c0_g2	400682.PAC_15717460	45.1	1.4e-39	ENOG410XQKW	J	Translation, ribosomal structure and biogenesis	CBP80 20-dependent translation initiation factor
TRINITY_DN11670_c0_g1	3702.ATCG00900.1	100	7.2e-32	COG0049	J	Translation, ribosomal structure and biogenesis	One of the primary rRNA binding proteins, it binds directly to 16S rRNA where it nucleates assembly of the head domain of the 30S subunit. Is located at the subunit interface close to the decoding center, probably blocks exit of the E-site tRNA (By similarity)
TRINITY_DN11670_c0_g2	4113.PGSC0003DMT400086496	98.5	3.1e-30	COG0048	J	Translation, ribosomal structure and biogenesis	Interacts with and stabilizes bases of the 16S rRNA that are involved in tRNA selection in the A site and with the mRNA backbone. Located at the interface of the 30S and 50S subunits, it traverses the body of the 30S subunit contacting proteins on the other side and probably holding the rRNA structure together. The combined cluster of proteins S8, S12 and S17 appears to hold together the shoulder…
TRINITY_DN11670_c0_g3	4081.Solyc02g080280.1.1	75.6	8.6e-23	COG1005	C	Energy production and conversion	NDH-1 shuttles electrons from NADH, via FMN and iron- sulfur (Fe-S) centers, to quinones in the respiratory chain. The immediate electron acceptor for the enzyme in this species is believed to be ubiquinone. Couples the redox reaction to proton translocation (for every two electrons transferred, four hydrogen ions are translocated across the cytoplasmic membrane), and thus conserves the redox ene…
TRINITY_DN11690_c0_g1	400682.PAC_15725811	63.9	5.1e-45	ENOG4111MWH	U	Intracellular trafficking, secretion, and vesicular transport	cornichon homolog
TRINITY_DN11690_c0_g2	9606.ENSP00000350757	61.5	2e-46	ENOG4111RK6	S	Function unknown	glia maturation factor
TRINITY_DN11703_c0_g1	8090.ENSORLP00000013387	80.5	1.1e-94	COG0090	J	Translation, ribosomal structure and biogenesis	One of the primary rRNA binding proteins. Required for association of the 30S and 50S subunits to form the 70S ribosome, for tRNA binding and peptide bond formation. It has been suggested to have peptidyltransferase activity
TRINITY_DN11706_c0_g1	400682.PAC_15709903	53.8	1e-18	ENOG41128B8	S	Function unknown	von Willebrand factor type D protein
TRINITY_DN11713_c0_g1	10228.TriadP30040	47.9	3.1e-77	COG0252	E	Amino acid transport and metabolism	L-asparaginase
TRINITY_DN11713_c0_g1	10228.TriadP30040	47.9	3.1e-77	COG0666	S	Function unknown	Ankyrin Repeat
TRINITY_DN11717_c0_g1	3218.PP1S234_67V6.1	43.1	5e-09	COG2940	S	Function unknown	Histone-lysine N-methyltransferase
TRINITY_DN11721_c1_g1	400682.PAC_15705487	63.7	3.4e-26	COG2801	L	Replication, recombination and repair	Retrotransposon protein
TRINITY_DN11727_c0_g1	51511.ENSCSAVP00000019071	55.7	4.4e-08	COG1436	C	Energy production and conversion	Subunit of the peripheral V1 complex of vacuolar ATPase essential for assembly or catalytic function. V-ATPase is responsible for acidifying a variety of intracellular compartments in eukaryotic cells (By similarity)
TRINITY_DN11736_c0_g1	10090.ENSMUSP00000005824	100	1.7e-48	ENOG4111552	O	Posttranslational modification, protein turnover, chaperones	apolipoprotein A-II
TRINITY_DN11736_c0_g2	10090.ENSMUSP00000031314	100	5.2e-215	ENOG410Z40H	O	Posttranslational modification, protein turnover, chaperones	Serum albumin, the main protein of plasma, has a good binding capacity for water, Ca(2 ), Na( ), K( ), fatty acids, hormones, bilirubin and drugs. Its main function is the regulation of the colloidal osmotic pressure of blood. Major zinc transporter in plasma, typically binds about 80 of all plasma zinc
TRINITY_DN11744_c0_g1	479433.Caci_5699	34.3	1.9e-53	COG0469	G	Carbohydrate transport and metabolism	Pyruvate kinase
TRINITY_DN11745_c0_g1	400682.PAC_15722736	36.1	3e-12	NA	NA	NA	NA
TRINITY_DN11748_c0_g1	7955.ENSDARP00000110119	64.7	2.1e-17	ENOG410ZYAK	S	Function unknown	NA
TRINITY_DN11750_c0_g1	400682.PAC_15722089	60.1	2.3e-51	ENOG410XRBQ	S	Function unknown	WAS protein family, member
TRINITY_DN11751_c0_g1	400682.PAC_15725781	77.4	5.6e-16	ENOG410XWWQ	S	Function unknown	Small nuclear ribonucleoprotein 27kDa (U4 U6.U5)
TRINITY_DN11755_c0_g1	29760.VIT_08s0007g03920.t01	53.2	1.9e-25	COG0177	L	Replication, recombination and repair	endonuclease III
TRINITY_DN11759_c0_g1	7739.JGI278987	52.8	2.6e-180	ENOG410XNZM	S	Function unknown	Protein arginine n-methyltransferase
TRINITY_DN11761_c0_g1	70448.Q00TA6	34.3	9.8e-24	ENOG411135U	U	Intracellular trafficking, secretion, and vesicular transport	NA
TRINITY_DN11763_c0_g1	69293.ENSGACP00000019749	56.4	9e-26	COG0451	M	Cell wall/membrane/envelope biogenesis	Nad-dependent epimerase dehydratase
TRINITY_DN11765_c0_g2	420662.Mpe_A3451	98.9	8.5e-46	COG0085	K	Transcription	DNA-dependent RNA polymerase catalyzes the transcription of DNA into RNA using the four ribonucleoside triphosphates as substrates (By similarity)
TRINITY_DN11769_c1_g2	3702.ATMG00510.1	93.3	4.4e-85	COG0649	C	Energy production and conversion	NDH-1 shuttles electrons from NADH, via FMN and iron- sulfur (Fe-S) centers, to quinones in the respiratory chain. The immediate electron acceptor for the enzyme in this species is believed to be ubiquinone. Couples the redox reaction to proton translocation (for every two electrons transferred, four hydrogen ions are translocated across the cytoplasmic membrane), and thus conserves the redox ene…
TRINITY_DN11772_c0_g2	400682.PAC_15727409	44.3	2.6e-74	COG4874	S	Function unknown	amidinotransferase
TRINITY_DN11782_c0_g1	400682.PAC_15724270	46.7	7.4e-13	NA	NA	NA	NA
TRINITY_DN1178_c0_g1	400682.PAC_15721649	39.9	3.9e-48	ENOG410XPGT	B	Chromatin structure and dynamics	SRY (sex determining region Y)-box
TRINITY_DN11797_c0_g1	59729.ENSTGUP00000009065	43.8	1.4e-08	ENOG41127PU	S	Function unknown	chromosome 4 open reading frame 34
TRINITY_DN11803_c0_g2	121225.PHUM105870-PA	71	2.1e-31	ENOG4111IPW	S	Function unknown	DDRGK domain containing 1
TRINITY_DN11810_c0_g1	10228.TriadP58497	61.8	1.5e-17	COG0238	J	Translation, ribosomal structure and biogenesis	Binds as a heterodimer with protein S6 to the central domain of the 16S rRNA, where it helps stabilize the platform of the 30S subunit (By similarity)
TRINITY_DN11812_c0_g1	400682.PAC_15727868	82	2.3e-14	ENOG4112229	J	Translation, ribosomal structure and biogenesis	Ribosomal protein L38
TRINITY_DN11819_c0_g2	8090.ENSORLP00000017719	45.7	2.3e-11	ENOG4111RHC	S	Function unknown	family with sequence similarity 204, member A
TRINITY_DN11825_c0_g1	3694.POPTR_0002s11250.1	100	9.4e-35	COG5023	Z	Cytoskeleton	protein polymerization
TRINITY_DN11832_c0_g1	400682.PAC_15706873	54.2	9.4e-16	COG2801	L	Replication, recombination and repair	Retrotransposon protein
TRINITY_DN11833_c0_g1	400682.PAC_15722719	37.8	2e-45	COG0688	I	Lipid transport and metabolism	Phosphatidylserine decarboxylase
TRINITY_DN11837_c0_g1	400682.PAC_15725944	41.3	1.4e-10	NA	NA	NA	NA
TRINITY_DN11840_c1_g1	400682.PAC_15728537	68.4	3.9e-62	ENOG4111IGV	O	Posttranslational modification, protein turnover, chaperones	ubiquitin-conjugating enzyme
TRINITY_DN11843_c0_g1	3847.GLYMA02G38730.1	96.5	2.2e-43	COG3588	G	Carbohydrate transport and metabolism	fructose-bisphosphate aldolase
TRINITY_DN11843_c0_g2	4641.GSMUA_Achr8P08990_001	95.6	1.6e-28	COG3588	G	Carbohydrate transport and metabolism	fructose-bisphosphate aldolase
TRINITY_DN11844_c0_g1	7719.ENSCINP00000017997	33.1	1.6e-08	COG4886	S	Function unknown	leucine Rich Repeat
TRINITY_DN11852_c0_g1	87626.PTD2_04958	59.4	1.1e-12	NA	NA	NA	NA
TRINITY_DN11853_c0_g1	400682.PAC_15725159	56	2.3e-51	ENOG410XNZY	U	Intracellular trafficking, secretion, and vesicular transport	NADPH Oxidase
TRINITY_DN11855_c0_g1	10228.TriadP63946	63.4	1.3e-06	ENOG410YD7P	S	Function unknown	Tat specific factor 1
TRINITY_DN11855_c0_g2	7739.JGI125707	62.5	7.4e-15	ENOG410YD7P	S	Function unknown	Tat specific factor 1
TRINITY_DN11855_c0_g3	400682.PAC_15725190	65.3	1.9e-40	ENOG410YD7P	S	Function unknown	Tat specific factor 1
TRINITY_DN11875_c0_g1	45351.NEMVEDRAFT_v1g88457-PA	55.5	1.4e-71	ENOG410ZQKM	S	Function unknown	chromosome 15 open reading frame 41
TRINITY_DN11879_c0_g1	400682.PAC_15725185	53.4	1.6e-117	COG0545	O	Posttranslational modification, protein turnover, chaperones	Peptidyl-prolyl cis-trans isomerase
TRINITY_DN11881_c0_g2	7739.JGI122350	30.7	4.7e-23	ENOG410XZEC	S	Function unknown	NA
TRINITY_DN11883_c0_g2	69293.ENSGACP00000000264	43.9	2.1e-60	ENOG410XT5T	I	Lipid transport and metabolism	tafazzin
TRINITY_DN11885_c0_g1	45351.NEMVEDRAFT_v1g237797-PA	70.3	3.2e-55	COG5134	S	Function unknown	Coiled-coil domain-containing protein
TRINITY_DN11893_c0_g1	4081.Solyc03g078400.2.1	100	2.1e-36	COG5277	Z	Cytoskeleton	Actin-related protein
TRINITY_DN11893_c0_g2	9606.ENSP00000290378	100	5.4e-51	COG5277	Z	Cytoskeleton	Actin-related protein
TRINITY_DN11903_c0_g1	400682.PAC_15722779	43.2	2.9e-52	ENOG410XQPY	S	Function unknown	Toll interacting protein
TRINITY_DN11916_c0_g1	400682.PAC_15725724	43.7	1.3e-129	COG5158	U	Intracellular trafficking, secretion, and vesicular transport	Vacuolar Protein
TRINITY_DN11918_c0_g1	400682.PAC_15713617	75.8	7.9e-230	COG0459	O	Posttranslational modification, protein turnover, chaperones	Prevents misfolding and promotes the refolding and proper assembly of unfolded polypeptides generated under stress conditions (By similarity)
TRINITY_DN11920_c0_g1	400682.PAC_15708563	48.5	1.5e-40	COG1078	S	Function unknown	Metal Dependent Phosphohydrolase
TRINITY_DN11924_c0_g1	7719.ENSCINP00000005310	59	1.7e-23	ENOG410XNZY	U	Intracellular trafficking, secretion, and vesicular transport	NADPH Oxidase
TRINITY_DN11930_c0_g1	7425.NV13885-PA	40.2	2e-15	COG1960	I	Lipid transport and metabolism	acyl-CoA dehydrogenase
TRINITY_DN11939_c0_g1	400682.PAC_15724639	38.6	5.5e-13	ENOG410XSA1	U	Intracellular trafficking, secretion, and vesicular transport	translocated promoter region, nuclear basket protein
TRINITY_DN1193_c0_g1	10090.ENSMUSP00000107477	100	4.1e-35	ENOG410XQFD	S	Function unknown	myosin light chain kinase
TRINITY_DN11951_c0_g1	400682.PAC_15717496	65.5	6.1e-60	ENOG410XS7V	S	Function unknown	Coiled-coil domain containing 135
TRINITY_DN11954_c0_g1	3694.POPTR_0001s27480.1	100	6.4e-33	ENOG410XNW0	U	Intracellular trafficking, secretion, and vesicular transport	transmembrane transport
TRINITY_DN11956_c0_g1	9606.ENSP00000215574	64.2	6.1e-57	COG5078	O	Posttranslational modification, protein turnover, chaperones	ubiquitin-conjugating enzyme
TRINITY_DN11963_c0_g2	400682.PAC_15711034	49.6	1.5e-61	ENOG410YPVA	O	Posttranslational modification, protein turnover, chaperones	RCE1 homolog, prenyl protein protease (S. cerevisiae)
TRINITY_DN11964_c0_g1	6183.Smp_020920.1__mRNA	60.7	2.4e-30	COG0484	O	Posttranslational modification, protein turnover, chaperones	ATP binding to DnaK triggers the release of the substrate protein, thus completing the reaction cycle. Several rounds of ATP-dependent interactions between DnaJ, DnaK and GrpE are required for fully efficient folding. Also involved, together with DnaK and GrpE, in the DNA replication of plasmids through activation of initiation proteins (By similarity)
TRINITY_DN11966_c0_g1	29760.VIT_14s0060g02270.t01	90.9	4.1e-37	ENOG4111FVP	S	Function unknown	tumor protein
TRINITY_DN11968_c0_g1	400682.PAC_15721586	27.9	4.1e-09	NA	NA	NA	NA
TRINITY_DN11968_c0_g2	400682.PAC_15721587	26.9	3.4e-08	ENOG410ZUXK	S	Function unknown	NA
TRINITY_DN11970_c0_g1	400682.PAC_15717987	59.8	2.8e-132	COG0057	G	Carbohydrate transport and metabolism	glyceraldehyde3phosphate dehydrogenase
TRINITY_DN11971_c0_g3	3702.AT2G07687.1	96.2	2e-145	COG1845	C	Energy production and conversion	Cytochrome C Oxidase, Subunit III
TRINITY_DN11973_c0_g1	3847.GLYMA05G25360.1	56.2	1.8e-11	COG4886	S	Function unknown	leucine Rich Repeat
TRINITY_DN11985_c0_g1	10228.TriadP24211	73.7	7.4e-52	COG0756	F	Nucleotide transport and metabolism	This enzyme is involved in nucleotide metabolism it produces dUMP, the immediate precursor of thymidine nucleotides and it decreases the intracellular concentration of dUTP so that uracil cannot be incorporated into DNA (By similarity)
TRINITY_DN11991_c0_g1	400682.PAC_15714561	78	1.2e-179	COG0180	J	Translation, ribosomal structure and biogenesis	tryptophanyltRNA synthetase
TRINITY_DN11992_c0_g1	400682.PAC_15716108	88.2	4.1e-230	COG1224	K	Transcription	ruvB-like
TRINITY_DN11997_c0_g1	400682.PAC_15720305	53.8	1.6e-43	COG0335	J	Translation, ribosomal structure and biogenesis	This protein is located at the 30S-50S ribosomal subunit interface and may play a role in the structure and function of the aminoacyl-tRNA binding site (By similarity)
TRINITY_DN11998_c0_g1	400682.PAC_15728190	67.6	2.8e-129	ENOG410XUSH	Q	Secondary metabolites biosynthesis, transport and catabolism	phytanoyl-CoA dioxygenase
TRINITY_DN11_c0_g1	6239.T23D8.1	26	1.9e-10	ENOG410XRC8	U	Intracellular trafficking, secretion, and vesicular transport	frizzled family receptor
TRINITY_DN12001_c0_g1	400682.PAC_15712837	51.9	2e-49	COG2365	T	Signal transduction mechanisms	protein tyrosine serine phosphatase
TRINITY_DN12012_c0_g1	400682.PAC_15717105	100	1.3e-31	COG1644	K	Transcription	DNA-dependent RNA polymerase catalyzes the transcription of DNA into RNA using the four ribonucleoside triphosphates as substrates
TRINITY_DN12012_c0_g3	400682.PAC_15723482	69.2	2e-147	ENOG410XQYH	S	Function unknown	Protein arginine n-methyltransferase
TRINITY_DN12028_c0_g1	400682.PAC_15723384	44.3	1.6e-43	ENOG410XQNP	O	Posttranslational modification, protein turnover, chaperones	serine peptidase inhibitor, Kunitz type
TRINITY_DN12033_c0_g1	8049.ENSGMOP00000002653	78.3	7.7e-105	ENOG410XPT4	A	RNA processing and modification	Splicing factor 3B subunit 4
TRINITY_DN12042_c0_g1	400682.PAC_15726470	69	2e-145	COG0024	J	Translation, ribosomal structure and biogenesis	Removes the N-terminal methionine from nascent proteins (By similarity)
TRINITY_DN12046_c0_g1	400682.PAC_15724990	53.9	3.6e-135	COG3669	G	Carbohydrate transport and metabolism	alpha-l-fucosidase
TRINITY_DN12051_c0_g1	33178.CADATEAP00006585	33.5	3.7e-44	COG0443	O	Posttranslational modification, protein turnover, chaperones	Heat shock protein
TRINITY_DN12057_c0_g1	13735.ENSPSIP00000016395	28.1	6.1e-08	ENOG4110AQE	S	Function unknown	Mitochondrial ribosomal protein S27
TRINITY_DN12062_c0_g1	7719.ENSCINP00000005012	33	1.9e-10	ENOG410XRC8	U	Intracellular trafficking, secretion, and vesicular transport	frizzled family receptor
TRINITY_DN12068_c0_g1	10116.ENSRNOP00000019627	31.2	1.4e-11	ENOG4110D9C	U	Intracellular trafficking, secretion, and vesicular transport	phosphorylated adaptor for RNA export
TRINITY_DN12079_c0_g1	7668.SPU_021538tr	43.8	5.6e-16	ENOG4111TZW	U	Intracellular trafficking, secretion, and vesicular transport	Membrane magnesium transporter 1
TRINITY_DN1207_c0_g1	400682.PAC_15716157	55.9	1.8e-92	ENOG410XUSH	Q	Secondary metabolites biosynthesis, transport and catabolism	phytanoyl-CoA dioxygenase
TRINITY_DN12083_c0_g1	400682.PAC_15715995	65	2.3e-19	ENOG4111JM9	U	Intracellular trafficking, secretion, and vesicular transport	SNAP-associated protein
TRINITY_DN12084_c0_g1	7739.JGI116815	67.9	2.4e-74	ENOG410XTBQ	U	Intracellular trafficking, secretion, and vesicular transport	vesicle-mediated transport
TRINITY_DN12086_c0_g1	400682.PAC_15714629	44.2	1.7e-60	COG0584	C	Energy production and conversion	glycerophosphoryl diester phosphodiesterase
TRINITY_DN1208_c0_g1	6085.XP_002158800	36.6	1.3e-06	COG1958	K	Transcription	small nuclear ribonucleoprotein
TRINITY_DN12104_c0_g1	281687.CJA16600	34.9	2.7e-09	ENOG410XR5X	S	Function unknown	poly(A) binding protein, cytoplasmic
TRINITY_DN12106_c1_g1	400682.PAC_15726770	51.8	3.3e-114	ENOG410XPGU	S	Function unknown	Macrophage erythroblast attacher
TRINITY_DN12108_c0_g1	400682.PAC_15721302	83.3	5.4e-08	ENOG410Y0TR	S	Function unknown	May be involved in N-glycosylation through its association with N-oligosaccharyl transferase (By similarity)
TRINITY_DN12110_c0_g1	9606.ENSP00000233545	45.1	9.6e-38	ENOG4111SYH	S	Function unknown	Peroxisomal membrane protein
TRINITY_DN12114_c0_g1	3847.GLYMA05G04230.1	59	3.4e-27	COG5206	O	Posttranslational modification, protein turnover, chaperones	phosphatidylinositol glycan anchor biosynthesis, class K
TRINITY_DN12119_c0_g1	400682.PAC_15727054	62.9	1.5e-81	COG0615	I	Lipid transport and metabolism	cytidylyltransferase
TRINITY_DN12119_c0_g1	400682.PAC_15727054	62.9	1.5e-81	COG0615	M	Cell wall/membrane/envelope biogenesis	cytidylyltransferase
TRINITY_DN12119_c0_g2	400682.PAC_15727035	71.3	1.8e-46	ENOG4111FJQ	A	RNA processing and modification	Nuclear cap-binding protein subunit
TRINITY_DN12121_c0_g1	400682.PAC_15714816	69	5.1e-49	ENOG4111JKI	S	Function unknown	Family with sequence similarity 183, member
TRINITY_DN12122_c0_g1	10116.ENSRNOP00000018367	68.1	4.7e-100	COG1798	J	Translation, ribosomal structure and biogenesis	S-adenosyl-L-methionine-dependent methyltransferase that catalyzes the trimethylation of the amino group of the modified target histidine residue in translation elongation factor 2 (EF- 2), to form an intermediate called diphthine. The three successive methylation reactions represent the second step of diphthamide biosynthesis (By similarity)
TRINITY_DN12124_c0_g1	400682.PAC_15714891	55.6	1.6e-59	ENOG4111IDT	S	Function unknown	Lysosomal thiol
TRINITY_DN12125_c0_g1	9913.ENSBTAP00000003285	40.6	5.8e-19	COG0625	O	Posttranslational modification, protein turnover, chaperones	glutathione Stransferase
TRINITY_DN12127_c0_g1	7460.GB12574-PA	31.7	2.3e-26	ENOG4111H0W	S	Function unknown	Sperm associated antigen 7
TRINITY_DN12141_c0_g1	400682.PAC_15723578	53	4.6e-22	ENOG410XRI4	S	Function unknown	programmed cell death
TRINITY_DN12142_c0_g1	5762.XP_002676603.1	37.9	4e-116	COG2304	S	Function unknown	von Willebrand factor, type A
TRINITY_DN12144_c0_g1	273063.ST1186	51.2	2.6e-08	NA	NA	NA	NA
TRINITY_DN12148_c0_g1	400682.PAC_15727198	65.1	1.2e-133	COG1063	E	Amino acid transport and metabolism	Dehydrogenase
TRINITY_DN12150_c0_g1	400682.PAC_15723320	39.8	7e-28	ENOG4111S9P	S	Function unknown	NA
TRINITY_DN12156_c0_g2	400682.PAC_15722100	62.5	2.6e-12	NA	NA	NA	NA
TRINITY_DN12161_c0_g1	400682.PAC_15712308	41.9	4e-156	ENOG410XNV2	U	Intracellular trafficking, secretion, and vesicular transport	two pore segment channel 2
TRINITY_DN12163_c0_g1	31234.CRE02025	61.7	3.3e-122	COG1071	C	Energy production and conversion	Dehydrogenase
TRINITY_DN12166_c0_g1	7668.SPU_015506tr	48.9	2.2e-16	ENOG410YI1X	U	Intracellular trafficking, secretion, and vesicular transport	Involved in transport from the ER to the Golgi apparatus as well as in intra-Golgi transport. It belongs to a super-family of proteins called t-SNAREs or soluble NSF (N-ethylmaleimide- sensitive factor) attachment protein receptor (By similarity)
TRINITY_DN12171_c0_g1	6085.XP_002158750	81.7	5.6e-69	COG5078	O	Posttranslational modification, protein turnover, chaperones	ubiquitin-conjugating enzyme
TRINITY_DN12185_c0_g4	7739.JGI120845	28.5	5e-20	ENOG410Z0EV	S	Function unknown	NA
TRINITY_DN12190_c0_g1	400682.PAC_15722413	31.5	8.9e-11	NA	NA	NA	NA
TRINITY_DN12192_c0_g1	400682.PAC_15717624	79.5	1.1e-261	COG4799	I	Lipid transport and metabolism	carboxylase
TRINITY_DN12193_c0_g1	7668.SPU_016121tr	56.4	3.1e-20	COG2801	L	Replication, recombination and repair	Retrotransposon protein
TRINITY_DN12197_c0_g1	400682.PAC_15711119	73.7	7.8e-113	ENOG410XQ0H	S	Function unknown	Methyltransferase like 14
TRINITY_DN12203_c0_g1	7668.SPU_014362tr	24.8	4.5e-18	COG5273	S	Function unknown	Zinc finger, DHHC-type containing
TRINITY_DN12204_c0_g1	400682.PAC_15724206	50.4	1.5e-91	ENOG4111FH2	S	Function unknown	poly (3-hydroxybutyrate) depolymerase
TRINITY_DN12206_c0_g1	441959.XP_002478330.1	42.2	3.2e-15	COG3000	I	Lipid transport and metabolism	fatty acid hydroxylase
TRINITY_DN12206_c0_g1	441959.XP_002478330.1	42.2	3.2e-15	COG5274	C	Energy production and conversion	cytochrome b5
TRINITY_DN12206_c0_g1	441959.XP_002478330.1	42.2	3.2e-15	COG5274	I	Lipid transport and metabolism	cytochrome b5
TRINITY_DN12206_c0_g2	45351.NEMVEDRAFT_v1g228340-PA	47.7	9.2e-63	COG3000	I	Lipid transport and metabolism	fatty acid hydroxylase
TRINITY_DN12206_c0_g2	45351.NEMVEDRAFT_v1g228340-PA	47.7	9.2e-63	COG5274	C	Energy production and conversion	cytochrome b5
TRINITY_DN12206_c0_g2	45351.NEMVEDRAFT_v1g228340-PA	47.7	9.2e-63	COG5274	I	Lipid transport and metabolism	cytochrome b5
TRINITY_DN12213_c0_g1	400682.PAC_15710383	51.6	4e-32	ENOG4111NS2	J	Translation, ribosomal structure and biogenesis	eukaryotic translation initiation factor 4b
TRINITY_DN12214_c0_g1	7955.ENSDARP00000047012	41	2.9e-39	COG2229	S	Function unknown	atp gtp-binding protein
TRINITY_DN12218_c0_g1	400682.PAC_15720002	45.8	8.3e-52	COG4339	S	Function unknown	NA
TRINITY_DN12221_c0_g1	400682.PAC_15721821	58.3	6e-100	COG0563	F	Nucleotide transport and metabolism	Catalyzes the reversible transfer of the terminal phosphate group between ATP and AMP. Plays an important role in cellular energy homeostasis and in adenine nucleotide metabolism (By similarity)
TRINITY_DN12224_c0_g2	400682.PAC_15724212	62.2	1.4e-113	ENOG410XNX8	S	Function unknown	kelch-like
TRINITY_DN12225_c0_g1	10116.ENSRNOP00000024287	54.6	9.4e-55	ENOG410XPUI	S	Function unknown	member RAS oncogene family
TRINITY_DN12234_c0_g3	400682.PAC_15721577	72.2	3.4e-33	ENOG4111MDW	O	Posttranslational modification, protein turnover, chaperones	ubiquitin-conjugating enzyme
TRINITY_DN12240_c0_g2	7739.JGI104271	37.5	6.9e-07	ENOG4111G04	S	Function unknown	tripartite motif containing
TRINITY_DN12246_c0_g1	400682.PAC_15716213	45.3	2e-15	COG5048	S	Function unknown	Zinc finger protein
TRINITY_DN12247_c0_g1	45351.NEMVEDRAFT_v1g90769-PA	41.9	2.9e-47	COG5539	O	Posttranslational modification, protein turnover, chaperones	otu domain-containing protein
TRINITY_DN12258_c0_g1	400682.PAC_15718232	43.1	6.8e-69	ENOG410XR2J	S	Function unknown	PP2Cc
TRINITY_DN12266_c0_g2	45351.NEMVEDRAFT_v1g169772-PA	47.5	4.5e-07	ENOG4111Y6Y	S	Function unknown	whole genome shotgun sequence
TRINITY_DN12269_c0_g1	7668.SPU_000181tr	36.8	4e-12	ENOG4111M7G	S	Function unknown	ribonuclease T2 activity
TRINITY_DN12271_c0_g1	400682.PAC_15721377	45	1.5e-19	ENOG4111VPU	S	Function unknown	lin-52 homolog (C. elegans)
TRINITY_DN12277_c0_g1	400682.PAC_15711801	42.6	4.5e-72	COG3386	G	Carbohydrate transport and metabolism	SMP-30 gluconolaconase LRE domain protein
TRINITY_DN12281_c0_g1	400682.PAC_15723384	45.6	1.6e-19	ENOG410XQNP	O	Posttranslational modification, protein turnover, chaperones	serine peptidase inhibitor, Kunitz type
TRINITY_DN12284_c0_g1	7668.SPU_000048tr	39.4	7.8e-17	ENOG4111I8D	P	Inorganic ion transport and metabolism	Solute carrier family 31 copper transporters member
TRINITY_DN12285_c0_g1	400682.PAC_15723059	93	1.7e-62	COG5272	O	Posttranslational modification, protein turnover, chaperones	ubiquitin
TRINITY_DN12290_c0_g1	7227.FBpp0083962	50.3	5.3e-34	ENOG4111JJW	J	Translation, ribosomal structure and biogenesis	ribosomal protein S24
TRINITY_DN12290_c0_g2	400682.PAC_15727049	36.2	2.1e-17	NA	NA	NA	NA
TRINITY_DN12292_c0_g1	400682.PAC_15713409	63.9	8.7e-21	COG2801	L	Replication, recombination and repair	Retrotransposon protein
TRINITY_DN12292_c0_g2	400682.PAC_15712703	69.4	2.9e-18	COG2801	L	Replication, recombination and repair	Retrotransposon protein
TRINITY_DN12292_c0_g3	400682.PAC_15706873	58.8	4.9e-35	COG2801	L	Replication, recombination and repair	Retrotransposon protein
TRINITY_DN12297_c0_g1	12957.ACEP_00003699-PA	39.5	3.3e-17	ENOG4111N81	U	Intracellular trafficking, secretion, and vesicular transport	positive regulation of triglyceride biosynthetic process
TRINITY_DN12297_c0_g2	400682.PAC_15725919	37.6	1.4e-15	ENOG410XPV4	U	Intracellular trafficking, secretion, and vesicular transport	nuclear pore complex protein
TRINITY_DN12301_c0_g1	3847.GLYMA04G32950.3	99	9.4e-53	COG0231	J	Translation, ribosomal structure and biogenesis	Involved in peptide bond synthesis. Stimulates efficient translation and peptide-bond synthesis on native or reconstituted 70S ribosomes in vitro. Probably functions indirectly by altering the affinity of the ribosome for aminoacyl-tRNA, thus increasing their reactivity as acceptors for peptidyl transferase (By similarity)
TRINITY_DN12302_c0_g1	10116.ENSRNOP00000024063	57.3	2.3e-102	COG0667	C	Energy production and conversion	Aldo keto reductase
TRINITY_DN12310_c0_g1	7739.JGI278341	36.8	1.5e-26	ENOG4111SG4	O	Posttranslational modification, protein turnover, chaperones	Wnt receptor signaling pathway
TRINITY_DN12313_c0_g1	45351.NEMVEDRAFT_v1g103646-PA	49.7	4.1e-128	ENOG410XQ2Q	S	Function unknown	sialic acid-specific 9-O-acetylesterase
TRINITY_DN12315_c0_g1	400682.PAC_15722702	27.3	1.4e-82	ENOG4111NYZ	S	Function unknown	NA
TRINITY_DN12319_c0_g1	7668.SPU_023974tr	41.9	6.1e-46	ENOG410XR6S	S	Function unknown	Granulin
TRINITY_DN12320_c0_g1	7159.AAEL002796-PA	31.5	1.3e-07	COG0252	E	Amino acid transport and metabolism	L-asparaginase
TRINITY_DN12320_c0_g1	7159.AAEL002796-PA	31.5	1.3e-07	COG0666	S	Function unknown	Ankyrin Repeat
TRINITY_DN12325_c0_g1	7955.ENSDARP00000026575	54.9	2.2e-40	ENOG4111IHM	S	Function unknown	RNA binding motif protein 8A
TRINITY_DN12327_c0_g1	7070.TC010564-PA	61.1	2.5e-58	COG0302	H	Coenzyme transport and metabolism	GTP cyclohydrolase i
TRINITY_DN12330_c0_g2	400682.PAC_15709658	55.5	2.2e-85	ENOG410XRWR	S	Function unknown	ubiquitin-conjugating enzyme
TRINITY_DN12333_c0_g1	7739.JGI125850	60.1	3.4e-132	ENOG410XNV7	O	Posttranslational modification, protein turnover, chaperones	aspartic
TRINITY_DN12339_c0_g1	400682.PAC_15728410	39.4	3.2e-46	ENOG410XR2E	K	Transcription	Mediator complex subunit 1
TRINITY_DN12339_c0_g2	400682.PAC_15728410	31.6	2.2e-08	ENOG410XR2E	K	Transcription	Mediator complex subunit 1
TRINITY_DN12343_c0_g1	521098.Aaci_0256	53.2	1.3e-87	COG0667	C	Energy production and conversion	Aldo keto reductase
TRINITY_DN12354_c0_g1	400682.PAC_15727454	44.3	5.8e-59	COG2267	I	Lipid transport and metabolism	alpha beta hydrolase fold
TRINITY_DN12354_c0_g2	400682.PAC_15727454	42.5	5.1e-59	COG2267	I	Lipid transport and metabolism	alpha beta hydrolase fold
TRINITY_DN12363_c0_g1	9986.ENSOCUP00000006295	63.4	1.2e-24	COG4886	S	Function unknown	leucine Rich Repeat
TRINITY_DN12367_c0_g1	400682.PAC_15718171	74.5	6e-12	ENOG4111KKV	S	Function unknown	coiled-coil domain containing 53
TRINITY_DN12367_c0_g2	400682.PAC_15718171	66.7	2.4e-32	ENOG4111KKV	S	Function unknown	coiled-coil domain containing 53
TRINITY_DN12368_c0_g1	400682.PAC_15722091	62.4	7e-27	ENOG410XPQQ	T	Signal transduction mechanisms	CAMP-dependent protein kinase, catalytic subunit
TRINITY_DN12372_c0_g1	400682.PAC_15715539	42.1	1.4e-68	ENOG410ZQN1	S	Function unknown	NA
TRINITY_DN12382_c0_g1	400682.PAC_15709885	36.1	1.5e-12	ENOG410XQZM	S	Function unknown	Spastic ataxia of Charlevoix-Saguenay (Sacsin)
TRINITY_DN12383_c0_g1	9739.ENSTTRP00000007814	41	1.2e-34	COG2453	T	Signal transduction mechanisms	dual specificity phosphatase
TRINITY_DN12383_c0_g4	69293.ENSGACP00000012917	59.4	1.9e-16	ENOG41121VM	S	Function unknown	chromosome 19 open reading frame 47
TRINITY_DN12383_c0_g6	400682.PAC_15716868	68.8	1.1e-26	ENOG41123E8	U	Intracellular trafficking, secretion, and vesicular transport	negative regulation of translational elongation
TRINITY_DN12386_c0_g2	400682.PAC_15713082	45.1	2.7e-40	ENOG411090A	S	Function unknown	small nuclear RNA activating complex, polypeptide 3
TRINITY_DN12388_c0_g1	400682.PAC_15721814	45.7	8.9e-52	ENOG4111VUI	S	Function unknown	Oxidoreductase, 2og-Fe(II) oxygenase family
TRINITY_DN12393_c0_g1	400682.PAC_15724063	82.7	5.3e-66	COG0459	O	Posttranslational modification, protein turnover, chaperones	Prevents misfolding and promotes the refolding and proper assembly of unfolded polypeptides generated under stress conditions (By similarity)
TRINITY_DN12393_c0_g2	400682.PAC_15724063	81.9	9.7e-165	COG0459	O	Posttranslational modification, protein turnover, chaperones	Prevents misfolding and promotes the refolding and proper assembly of unfolded polypeptides generated under stress conditions (By similarity)
TRINITY_DN12399_c0_g1	400682.PAC_15724299	39.3	8.1e-41	ENOG41119IF	S	Function unknown	NA
TRINITY_DN12411_c0_g1	400682.PAC_15721681	49.4	4.7e-88	COG4886	S	Function unknown	leucine Rich Repeat
TRINITY_DN12411_c0_g1	400682.PAC_15721681	49.4	4.7e-88	COG5024	D	Cell cycle control, cell division, chromosome partitioning	g2 mitotic-specific
TRINITY_DN12413_c0_g2	9258.ENSOANP00000020079	64.6	9.1e-29	ENOG4111QZA	S	Function unknown	ER membrane protein complex subunit 6
TRINITY_DN12414_c0_g1	400682.PAC_15722369	42.1	9.4e-101	ENOG410XNQK	G	Carbohydrate transport and metabolism	Transporter
TRINITY_DN12420_c0_g1	45351.NEMVEDRAFT_v1g239782-PA	69.5	3.6e-54	ENOG410XNW7	S	Function unknown	wilms tumor 1 associated protein
TRINITY_DN12424_c0_g1	6334.EFV56578	58	7.6e-59	COG1881	S	Function unknown	phosphatidylethanolamine-binding protein
TRINITY_DN12425_c0_g1	400682.PAC_15711801	39.2	2.5e-30	COG3386	G	Carbohydrate transport and metabolism	SMP-30 gluconolaconase LRE domain protein
TRINITY_DN12433_c0_g1	400682.PAC_15718650	39.7	1.4e-37	ENOG4111RNS	S	Function unknown	non-SMC element 1 homolog (S. cerevisiae)
TRINITY_DN12436_c0_g1	400682.PAC_15716945	57.2	6e-47	COG5025	K	Transcription	forkhead box
TRINITY_DN12439_c0_g1	7739.JGI67866	68.9	1e-37	COG0452	H	Coenzyme transport and metabolism	Phosphopantothenoylcysteine decarboxylase
TRINITY_DN12440_c0_g1	400682.PAC_15720562	72.9	2.1e-79	ENOG410ZPSP	S	Function unknown	radial spoke 3 homolog (Chlamydomonas)
TRINITY_DN12443_c0_g1	45351.NEMVEDRAFT_v1g194682-PA	51.4	1.1e-51	COG5059	Z	Cytoskeleton	Kinesin family member
TRINITY_DN12452_c0_g1	7739.JGI234517	56.2	3e-30	ENOG4111XVR	I	Lipid transport and metabolism	NADH dehydrogenase (ubiquinone) activity
TRINITY_DN12453_c0_g1	7739.JGI69075	48.4	8.6e-09	ENOG410XPJ1	S	Function unknown	c-type lectin domain family
TRINITY_DN12453_c0_g1	7739.JGI69075	48.4	8.6e-09	ENOG410XTGE	S	Function unknown	Polycystic kidney disease
TRINITY_DN12454_c0_g1	7668.SPU_000253tr	63.1	5.3e-13	COG1100	S	Function unknown	GTP-binding Protein
TRINITY_DN12457_c0_g1	7719.ENSCINP00000026930	27.4	7.7e-19	ENOG410XRKC	D	Cell cycle control, cell division, chromosome partitioning	(DC) complex that phosphorylates and inhibits members of the retinoblastoma (RB) protein family including RB1 and regulates the cell-cycle during G(1) S transition. Phosphorylation of RB1 allows dissociation of the transcription factor E2F from the RB E2F complex and the subsequent transcription of E2F target genes which are responsible for the progression through the G(1) phase. Hypophosphorylat…
TRINITY_DN12463_c0_g1	8090.ENSORLP00000014389	50.4	5.1e-29	ENOG410Y9AE	S	Function unknown	Chromosome 21 open reading frame 2
TRINITY_DN12463_c0_g2	7668.SPU_004398tr	49.7	1.3e-33	ENOG4111IVN	S	Function unknown	tm2 domain-containing protein
TRINITY_DN12466_c0_g1	400682.PAC_15716299	40.3	5.1e-152	ENOG410XSAC	S	Function unknown	modulation by virus of host morphology or physiology
TRINITY_DN12470_c0_g1	51511.ENSCSAVP00000013596	86.9	1.3e-36	COG0089	J	Translation, ribosomal structure and biogenesis	One of the early assembly proteins it binds 23S rRNA. One of the proteins that surrounds the polypeptide exit tunnel on the outside of the ribosome. Forms the main docking site for trigger factor binding to the ribosome (By similarity)
TRINITY_DN12470_c0_g3	400682.PAC_15717375	46.5	1.3e-25	COG1028	S	Function unknown	Dehydrogenase reductase
TRINITY_DN12470_c0_g4	431895.XP_001742167.1	71.6	3.7e-19	COG1028	S	Function unknown	Dehydrogenase reductase
TRINITY_DN12483_c0_g1	400682.PAC_15727817	67.3	5.4e-182	COG0087	J	Translation, ribosomal structure and biogenesis	One of the primary rRNA binding proteins, it binds directly near the 3'-end of the 23S rRNA, where it nucleates assembly of the 50S subunit (By similarity)
TRINITY_DN12485_c0_g1	6085.XP_002156080	47.6	1.4e-12	ENOG410XPVZ	U	Intracellular trafficking, secretion, and vesicular transport	Integrin, alpha
TRINITY_DN12487_c0_g1	400682.PAC_15712680	52.1	3.5e-73	ENOG410XNWT	S	Function unknown	Solute carrier family 25 member
TRINITY_DN12488_c0_g1	400682.PAC_15726106	72.4	1.4e-50	ENOG4111HZU	S	Function unknown	zinc finger, HIT-type containing 1
TRINITY_DN12491_c0_g2	400682.PAC_15722399	32.4	5.7e-57	ENOG4111H3D	S	Function unknown	NACHT, LRR and PYD domains-containing protein
TRINITY_DN12492_c0_g1	7739.JGI233605	42.4	1.4e-95	ENOG410XQZ4	I	Lipid transport and metabolism	PhosphoLipase D family member
TRINITY_DN12493_c0_g1	4555.Si020734m	96.6	3.5e-216	COG0056	C	Energy production and conversion	Produces ATP from ADP in the presence of a proton gradient across the membrane. The alpha chain is a regulatory subunit (By similarity)
TRINITY_DN12493_c0_g2	3847.GLYMA05G18376.1	66.7	3.4e-14	NA	NA	NA	NA
TRINITY_DN12494_c0_g2	338969.Rfer_4221	88.4	1.9e-13	COG0257	J	Translation, ribosomal structure and biogenesis	50S ribosomal protein L36
TRINITY_DN12495_c0_g1	400682.PAC_15723773	26.8	3.5e-07	NA	NA	NA	NA
TRINITY_DN12497_c0_g1	13735.ENSPSIP00000000489	71.4	2.2e-07	COG2801	L	Replication, recombination and repair	Retrotransposon protein
TRINITY_DN12504_c0_g1	7668.SPU_028354tr	66.7	6.5e-138	COG0022	C	Energy production and conversion	Dehydrogenase, E1 component
TRINITY_DN12504_c0_g1	7668.SPU_028354tr	66.7	6.5e-138	COG2940	S	Function unknown	Histone-lysine N-methyltransferase
TRINITY_DN1250_c0_g1	10090.ENSMUSP00000015800	98.2	2.8e-43	COG0443	O	Posttranslational modification, protein turnover, chaperones	Heat shock protein
TRINITY_DN12517_c0_g1	8364.ENSXETP00000015410	56.6	3.3e-24	ENOG410YE53	S	Function unknown	Family with sequence similarity 76, member
TRINITY_DN12520_c0_g1	400682.PAC_15709597	55.9	3.5e-51	ENOG4111JJD	S	Function unknown	Chromosome 15 open reading frame 38
TRINITY_DN12520_c0_g3	13037.EHJ72379	63.7	4.2e-33	ENOG410XRQI	S	Function unknown	Embryonic ectoderm development
TRINITY_DN12529_c0_g2	400682.PAC_15719722	47.2	7.6e-19	ENOG410Y128	S	Function unknown	RAS p21 protein activator
TRINITY_DN12529_c0_g3	7070.TC013861-PA	42.2	2.9e-49	ENOG410Z3FZ	I	Lipid transport and metabolism	fatty acid elongase
TRINITY_DN12532_c0_g1	59463.ENSMLUP00000007099	57.1	6.2e-41	ENOG410XR19	S	Function unknown	suppression of tumorigenicity 13 (colon carcinoma) (Hsp70 interacting protein)
TRINITY_DN12539_c0_g1	400682.PAC_15716368	36.4	2.9e-26	ENOG410YY9R	Z	Cytoskeleton	Component of the PAN1 actin cytoskeleton-regulatory complex required for the internalization of endosomes during actin-coupled endocytosis. The complex links the site of endocytosis to the cell membrane-associated actin cytoskeleton. Mediates uptake of external molecules and vacuolar degradation of plasma membrane proteins. Plays a role in the proper organization of the cell membrane-associated a…
TRINITY_DN1253_c0_g1	9606.ENSP00000336702	70.3	1.5e-60	COG0231	J	Translation, ribosomal structure and biogenesis	Involved in peptide bond synthesis. Stimulates efficient translation and peptide-bond synthesis on native or reconstituted 70S ribosomes in vitro. Probably functions indirectly by altering the affinity of the ribosome for aminoacyl-tRNA, thus increasing their reactivity as acceptors for peptidyl transferase (By similarity)
TRINITY_DN12541_c0_g1	400682.PAC_15726723	47.1	1.1e-28	COG5034	B	Chromatin structure and dynamics	Inhibitor of growth family member
TRINITY_DN12541_c0_g2	400682.PAC_15726722	64.2	2.2e-156	COG4725	K	Transcription	MT-A70 family
TRINITY_DN12541_c0_g2	400682.PAC_15726722	64.2	2.2e-156	COG4725	T	Signal transduction mechanisms	MT-A70 family
TRINITY_DN12543_c0_g1	3847.GLYMA04G14640.3	95.9	1e-44	COG4352	J	Translation, ribosomal structure and biogenesis	cytoplasmic translation
TRINITY_DN12547_c0_g1	9785.ENSLAFP00000000183	43.9	9e-35	ENOG4111M4R	U	Intracellular trafficking, secretion, and vesicular transport	sugar transporter
TRINITY_DN12550_c0_g1	400682.PAC_15711690	71.2	1.7e-86	ENOG410XS23	O	Posttranslational modification, protein turnover, chaperones	The proteasome is a multicatalytic proteinase complex which is characterized by its ability to cleave peptides with Arg, Phe, Tyr, Leu, and Glu adjacent to the leaving group at neutral or slightly basic pH. The proteasome has an ATP-dependent proteolytic activity (By similarity)
TRINITY_DN12552_c0_g1	400682.PAC_15722400	47	1.1e-91	COG1409	S	Function unknown	Hydrolyzes cAMP to 5'-AMP. Plays an important regulatory role in modulating the intracellular concentration of cAMP, thereby influencing cAMP-dependent processes (By similarity)
TRINITY_DN12552_c0_g2	400682.PAC_15717259	50.4	7.3e-57	COG1409	S	Function unknown	Hydrolyzes cAMP to 5'-AMP. Plays an important regulatory role in modulating the intracellular concentration of cAMP, thereby influencing cAMP-dependent processes (By similarity)
TRINITY_DN12553_c0_g1	400682.PAC_15726496	64.6	7.2e-65	ENOG410XPXF	O	Posttranslational modification, protein turnover, chaperones	leprecan-like
TRINITY_DN12553_c0_g2	400682.PAC_15726496	33.7	3.3e-56	ENOG410XPXF	O	Posttranslational modification, protein turnover, chaperones	leprecan-like
TRINITY_DN12555_c0_g1	400682.PAC_15725076	45.2	9.2e-61	COG5291	S	Function unknown	Derlin 1
TRINITY_DN12558_c0_g1	5786.XP_003286351.1	41.4	1.7e-54	ENOG410Z4GH	S	Function unknown	nudix (nucleoside diphosphate linked moiety X)-type motif 6
TRINITY_DN12559_c0_g1	400682.PAC_15723608	48.8	3.8e-30	ENOG410XR16	S	Function unknown	GATA zinc finger domain containing 1
TRINITY_DN12560_c0_g1	7668.SPU_024288tr	42.8	7.4e-22	ENOG4111UX7	S	Function unknown	vitamin K epoxide reductase complex subunit
TRINITY_DN12571_c1_g2	400682.PAC_15726198	54.1	1.5e-25	COG1022	I	Lipid transport and metabolism	Amp-dependent synthetase and ligase
TRINITY_DN12572_c0_g1	400682.PAC_15716512	41.6	5.6e-42	NA	NA	NA	NA
TRINITY_DN12573_c0_g1	400682.PAC_15724307	37.8	9e-71	ENOG410XQ0V	S	Function unknown	Mesoderm development candidate 1
TRINITY_DN12574_c0_g1	400682.PAC_15714961	41.3	1.3e-18	ENOG4111JBG	K	Transcription	Component of the nascent polypeptide-associated complex (NAC), a dynamic component of the ribosomal exit tunnel, protecting the emerging polypeptides from interaction with other cytoplasmic proteins to ensure appropriate nascent protein targeting (By similarity). The NAC complex also promotes mitochondrial protein import by enhancing productive ribosome interactions with the outer mitochondrial m…
TRINITY_DN12574_c0_g2	7897.ENSLACP00000020733	58.7	9.1e-64	COG4886	S	Function unknown	leucine Rich Repeat
TRINITY_DN12577_c0_g1	400682.PAC_15728492	34.2	1.2e-15	ENOG4111IRY	S	Function unknown	tetraspanin
TRINITY_DN12581_c0_g1	7897.ENSLACP00000000816	56.9	2.7e-155	COG2986	E	Amino acid transport and metabolism	histidine ammonia-lyase
TRINITY_DN12583_c0_g1	431895.XP_001746947.1	45.5	2e-07	COG0515	T	Signal transduction mechanisms	Serine Threonine protein kinase
TRINITY_DN12584_c1_g1	7897.ENSLACP00000003689	62.8	9.1e-19	ENOG410XPBD	S	Function unknown	Growth arrest-specific 8
TRINITY_DN12584_c1_g3	400682.PAC_15723724	77.7	3e-60	ENOG410XPBD	S	Function unknown	Growth arrest-specific 8
TRINITY_DN12587_c0_g1	400682.PAC_15721058	46.6	3.7e-205	ENOG410XRCG	U	Intracellular trafficking, secretion, and vesicular transport	USO1 vesicle docking protein homolog (yeast)
TRINITY_DN12590_c0_g1	400682.PAC_15725224	61.4	6.9e-81	COG1028	S	Function unknown	Dehydrogenase reductase
TRINITY_DN12591_c0_g1	7668.SPU_022594tr	57.1	6.1e-14	ENOG4111S9J	S	Function unknown	PEST proteolytic signal containing nuclear protein
TRINITY_DN12596_c0_g1	45351.NEMVEDRAFT_v1g175435-PA	46.6	7.5e-88	ENOG410Y4QU	O	Posttranslational modification, protein turnover, chaperones	Procollagen-lysine 2-oxoglutarate 5-dioxygenase
TRINITY_DN12597_c0_g2	6669.DappuP115824	53.2	3.7e-06	NA	NA	NA	NA
TRINITY_DN12604_c0_g1	400682.PAC_15719617	50.5	4.9e-155	COG0415	L	Replication, recombination and repair	deoxyribo-dipyrimidine photolyase
TRINITY_DN12605_c1_g1	12957.ACEP_00004697-PA	62.9	8.4e-14	ENOG41128HA	K	Transcription	synovial sarcoma translocation gene on chromosome 18-like
TRINITY_DN12607_c0_g2	400682.PAC_15721189	39	2.9e-12	ENOG410XQQ0	O	Posttranslational modification, protein turnover, chaperones	ubiquitin carboxyl-terminal hydrolase
TRINITY_DN12611_c0_g1	7739.JGI202638	77.4	1.1e-46	ENOG410Z5PX	S	Function unknown	auxiliary factor
TRINITY_DN12611_c0_g2	400682.PAC_15724627	73.2	2.3e-28	ENOG4112266	J	Translation, ribosomal structure and biogenesis	40S ribosomal protein S21
TRINITY_DN12618_c0_g1	400682.PAC_15720184	59.9	7.7e-137	COG0472	M	Cell wall/membrane/envelope biogenesis	phospho-N-acetylmuramoyl-pentapeptide-transferase activity
TRINITY_DN12619_c0_g1	400682.PAC_15707686	55.6	5.3e-14	COG2234	S	Function unknown	peptidase m28
TRINITY_DN12625_c0_g1	10228.TriadP50185	54.4	9.3e-13	COG1473	E	Amino acid transport and metabolism	amidohydrolase
TRINITY_DN12625_c0_g2	400682.PAC_15713316	57.1	3.6e-115	COG1473	E	Amino acid transport and metabolism	amidohydrolase
TRINITY_DN12628_c0_g1	400682.PAC_15714698	65.4	2.6e-138	COG2273	G	Carbohydrate transport and metabolism	hydrolase family 16
TRINITY_DN12628_c0_g2	400682.PAC_15714698	66.4	1.1e-129	COG2273	G	Carbohydrate transport and metabolism	hydrolase family 16
TRINITY_DN12631_c0_g2	9823.ENSSSCP00000028183	32.8	1.5e-33	ENOG4111GSN	S	Function unknown	Glioma tumor suppressor candidate region gene 2
TRINITY_DN12632_c0_g1	400682.PAC_15718048	61.4	5.7e-112	ENOG410XRAQ	T	Signal transduction mechanisms	Nemo-Like kinase
TRINITY_DN12639_c0_g1	7955.ENSDARP00000105541	28.5	4.3e-09	COG5032	B	Chromatin structure and dynamics	phosphatidylinositol kinase activity
TRINITY_DN12639_c0_g1	7955.ENSDARP00000105541	28.5	4.3e-09	COG5032	D	Cell cycle control, cell division, chromosome partitioning	phosphatidylinositol kinase activity
TRINITY_DN12639_c0_g1	7955.ENSDARP00000105541	28.5	4.3e-09	COG5032	L	Replication, recombination and repair	phosphatidylinositol kinase activity
TRINITY_DN12639_c0_g1	7955.ENSDARP00000105541	28.5	4.3e-09	COG5032	T	Signal transduction mechanisms	phosphatidylinositol kinase activity
TRINITY_DN12639_c0_g1	7955.ENSDARP00000105541	28.5	4.3e-09	COG5032	U	Intracellular trafficking, secretion, and vesicular transport	phosphatidylinositol kinase activity
TRINITY_DN12640_c0_g1	7897.ENSLACP00000018720	28	3.3e-11	COG1100	S	Function unknown	GTP-binding Protein
TRINITY_DN12649_c0_g1	9305.ENSSHAP00000021423	27.9	9.3e-55	ENOG410XPKZ	S	Function unknown	ADAM metallopeptidase with thrombospondin type 1, motif
TRINITY_DN12650_c0_g1	400682.PAC_15724281	52.4	5e-28	ENOG411257E	S	Function unknown	chromosome 4 open reading frame 45
TRINITY_DN12652_c0_g1	7739.JGI83339	33.1	3.3e-09	ENOG41105PP	S	Function unknown	RNA binding motif protein
TRINITY_DN12654_c0_g1	400682.PAC_15724184	53.9	1.3e-64	ENOG4111HEU	S	Function unknown	chromosome 7 open reading frame 62
TRINITY_DN12657_c0_g1	400682.PAC_15717214	69	1.1e-136	ENOG410XNX8	S	Function unknown	kelch-like
TRINITY_DN12658_c0_g1	400682.PAC_15707686	57.5	1.1e-14	COG2234	S	Function unknown	peptidase m28
TRINITY_DN12661_c0_g2	9986.ENSOCUP00000018455	54.9	1.3e-26	COG1324	P	Inorganic ion transport and metabolism	tolerance protein
TRINITY_DN12665_c0_g3	400682.PAC_15711807	50.8	3.6e-12	ENOG410XQ8C	S	Function unknown	PIH1 domain containing
TRINITY_DN12666_c0_g1	30608.ENSMICP00000013088	82.2	1.6e-66	COG1500	J	Translation, ribosomal structure and biogenesis	Ribosome maturation protein
TRINITY_DN12668_c0_g1	7029.ACYPI20004-PA	62.8	9.7e-07	NA	NA	NA	NA
TRINITY_DN12671_c0_g2	400682.PAC_15711101	28.9	1.5e-38	ENOG41129DZ	S	Function unknown	pigeon homolog (Drosophila)
TRINITY_DN12673_c0_g1	486041.XP_001878127.1	41.8	1.4e-45	COG0726	G	Carbohydrate transport and metabolism	4-amino-4-deoxy-alpha-L-arabinopyranosyl undecaprenyl phosphate biosynthetic process
TRINITY_DN12676_c0_g1	400682.PAC_15723568	51.1	1.7e-72	ENOG410YT6B	S	Function unknown	ER membrane protein complex subunit 2
TRINITY_DN12680_c0_g1	400682.PAC_15720782	32.7	2.2e-58	COG5409	T	Signal transduction mechanisms	Xenotropic and polytropic retrovirus receptor 1
TRINITY_DN12689_c0_g2	400682.PAC_15713015	36	1.4e-29	ENOG410YIKI	U	Intracellular trafficking, secretion, and vesicular transport	Small GTPase component of the coat protein complex II (COPII) which promotes the formation of transport vesicles from the endoplasmic reticulum (ER). The coat has two main functions, the physical deformation of the endoplasmic reticulum membrane into vesicles and the selection of cargo molecules. SAR1 controls the coat assembly in a stepwise manner. Activated SAR1-GTP binds to membranes first and…
TRINITY_DN12691_c0_g2	400682.PAC_15726245	51.6	4.5e-34	ENOG4112AMJ	O	Posttranslational modification, protein turnover, chaperones	Late endosomal lysosomal adaptor, MAPK and MTOR activator 1
TRINITY_DN12693_c0_g1	400682.PAC_15718057	52.6	4.8e-82	COG2453	T	Signal transduction mechanisms	dual specificity phosphatase
TRINITY_DN12706_c0_g2	395495.Lcho_1811	85.5	2.2e-34	COG4993	G	Carbohydrate transport and metabolism	Dehydrogenase
TRINITY_DN12709_c0_g1	7668.SPU_023836tr	43	5.2e-60	COG0468	L	Replication, recombination and repair	Can catalyze the hydrolysis of ATP in the presence of single-stranded DNA, the ATP-dependent uptake of single-stranded DNA by duplex DNA, and the ATP-dependent hybridization of homologous single-stranded DNAs. It interacts with LexA causing its activation and leading to its autocatalytic cleavage (By similarity)
TRINITY_DN12709_c0_g2	400682.PAC_15724065	48	1.1e-101	COG0671	I	Lipid transport and metabolism	PHOsphatase
TRINITY_DN12714_c0_g1	400682.PAC_15721970	42.9	3.4e-31	ENOG411219K	S	Function unknown	NA
TRINITY_DN12720_c0_g1	9305.ENSSHAP00000003765	48.2	2.2e-44	ENOG410YFY9	O	Posttranslational modification, protein turnover, chaperones	family with sequence similarity 213, member
TRINITY_DN12721_c0_g1	8049.ENSGMOP00000011555	48.2	7.3e-60	COG0300	S	Function unknown	Dehydrogenase
TRINITY_DN12726_c0_g2	400682.PAC_15728334	82.1	4.1e-128	ENOG410XQGZ	S	Function unknown	guanine nucleotidebinding protein
TRINITY_DN12726_c0_g4	400682.PAC_15728332	62.5	3.7e-21	COG5603	U	Intracellular trafficking, secretion, and vesicular transport	trafficking protein particle complex
TRINITY_DN12727_c0_g1	3847.GLYMA08G18110.1	98.6	4.5e-34	COG0480	J	Translation, ribosomal structure and biogenesis	Catalyzes the GTP-dependent ribosomal translocation step during translation elongation. During this step, the ribosome changes from the pre-translocational (PRE) to the post- translocational (POST) state as the newly formed A-site-bound peptidyl-tRNA and P-site-bound deacylated tRNA move to the P and E sites, respectively. Catalyzes the coordinated movement of the two tRNA molecules, the mRNA and…
TRINITY_DN12727_c0_g2	4533.OB04G10760.1	94.8	5.5e-38	COG0480	J	Translation, ribosomal structure and biogenesis	Catalyzes the GTP-dependent ribosomal translocation step during translation elongation. During this step, the ribosome changes from the pre-translocational (PRE) to the post- translocational (POST) state as the newly formed A-site-bound peptidyl-tRNA and P-site-bound deacylated tRNA move to the P and E sites, respectively. Catalyzes the coordinated movement of the two tRNA molecules, the mRNA and…
TRINITY_DN12728_c0_g1	7668.SPU_006044tr	63.4	8.6e-90	COG2259	S	Function unknown	doxx family
TRINITY_DN12730_c0_g1	400682.PAC_15722131	49.2	9.9e-09	ENOG410XPSW	S	Function unknown	phospholipase c
TRINITY_DN12732_c0_g1	7739.JGI131270	47.7	3.5e-93	ENOG410YCYZ	S	Function unknown	coiled-coil domain containing 105
TRINITY_DN12736_c0_g1	45351.NEMVEDRAFT_v1g87697-PA	27.3	4.8e-07	ENOG410XNN1	S	Function unknown	Gamma-aminobutyric acid (GABA) B receptor
TRINITY_DN12736_c0_g2	400682.PAC_15727954	23.8	4.4e-22	ENOG410XNN1	S	Function unknown	Gamma-aminobutyric acid (GABA) B receptor
TRINITY_DN12739_c0_g1	400682.PAC_15717831	33.9	6.6e-17	ENOG410XTAN	S	Function unknown	Ring finger protein
TRINITY_DN12743_c0_g1	4081.Solyc12g010920.1.1	61.6	4e-17	ENOG410YRX9	S	Function unknown	May have a structural role to stabilize the lipid body during desiccation of the seed by preventing coalescence of the oil. Probably interacts with both lipid and phospholipid moieties of lipid bodies. May also provide recognition signals for specific lipase anchorage in lipolysis during seedling growth
TRINITY_DN12744_c0_g1	9305.ENSSHAP00000015388	83.3	1e-25	ENOG410YIJ3	K	Transcription	sequence-specific DNA binding
TRINITY_DN12746_c0_g2	7668.SPU_003750tr	38.7	5.8e-137	ENOG410XSM3	S	Function unknown	non-SMC condensin II complex, subunit G2
TRINITY_DN12748_c0_g1	3847.GLYMA13G42310.1	88.8	1.5e-55	ENOG410YN4N	S	Function unknown	Plant lipoxygenase may be involved in a number of diverse aspects of plant physiology including growth and development, pest resistance, and senescence or responses to wounding (By similarity)
TRINITY_DN12748_c0_g2	3847.GLYMA13G42310.1	86.1	9.7e-29	ENOG410YN4N	S	Function unknown	Plant lipoxygenase may be involved in a number of diverse aspects of plant physiology including growth and development, pest resistance, and senescence or responses to wounding (By similarity)
TRINITY_DN12748_c0_g3	3847.GLYMA13G42310.1	81.5	1.6e-65	ENOG410YN4N	S	Function unknown	Plant lipoxygenase may be involved in a number of diverse aspects of plant physiology including growth and development, pest resistance, and senescence or responses to wounding (By similarity)
TRINITY_DN12748_c0_g4	3847.GLYMA07G03910.1	81.9	1.5e-36	ENOG410YN4N	S	Function unknown	Plant lipoxygenase may be involved in a number of diverse aspects of plant physiology including growth and development, pest resistance, and senescence or responses to wounding (By similarity)
TRINITY_DN12748_c0_g5	3847.GLYMA13G42310.1	83.4	8.4e-134	ENOG410YN4N	S	Function unknown	Plant lipoxygenase may be involved in a number of diverse aspects of plant physiology including growth and development, pest resistance, and senescence or responses to wounding (By similarity)
TRINITY_DN12749_c0_g1	7739.JGI60838	49.4	4.3e-38	COG1208	M	Cell wall/membrane/envelope biogenesis	nucleotidyl transferase
TRINITY_DN12750_c0_g2	3702.AT2G07741.1	81.9	1.2e-112	COG0356	C	Energy production and conversion	it plays a direct role in the translocation of protons across the membrane (By similarity)
TRINITY_DN12750_c0_g5	3702.AT2G07727.1	95.9	1.3e-220	COG1290	C	Energy production and conversion	Component of the ubiquinol-cytochrome c reductase complex (complex III or cytochrome b-c1 complex), which is a respiratory chain that generates an electrochemical potential coupled to ATP synthesis (By similarity)
TRINITY_DN12750_c0_g9	3702.ATCG00120.1	100	1.6e-54	COG0056	C	Energy production and conversion	Produces ATP from ADP in the presence of a proton gradient across the membrane. The alpha chain is a regulatory subunit (By similarity)
TRINITY_DN12752_c0_g1	7029.ACYPI002693-PA	33.1	1.2e-28	COG2131	F	Nucleotide transport and metabolism	dCMP deaminase activity
TRINITY_DN12755_c1_g4	10228.TriadP52590	50.7	1e-07	COG0037	D	Cell cycle control, cell division, chromosome partitioning	Ligates lysine onto the cytidine present at position 34 of the AUA codon-specific tRNA(Ile) that contains the anticodon CAU, in an ATP-dependent manner. Cytidine is converted to lysidine, thus changing the amino acid specificity of the tRNA from methionine to isoleucine (By similarity)
TRINITY_DN12755_c1_g5	400682.PAC_15721080	56.5	2.8e-15	ENOG41121WI	S	Function unknown	zinc finger
TRINITY_DN12756_c0_g1	357808.RoseRS_2594	45.2	3.9e-20	COG1231	E	Amino acid transport and metabolism	L-amino-acid oxidase activity
TRINITY_DN12766_c0_g1	400682.PAC_15721810	39.9	3.9e-17	ENOG4111J90	U	Intracellular trafficking, secretion, and vesicular transport	vesicle transport through interaction with t-SNAREs
TRINITY_DN12767_c0_g1	9669.ENSMPUP00000011481	81.8	2.6e-31	ENOG41127RM	S	Function unknown	NA
TRINITY_DN12768_c0_g1	7668.SPU_015833tr	39.2	1.9e-52	ENOG410Y1T7	S	Function unknown	brain and reproductive organ-expressed (TNFRSF1A modulator)
TRINITY_DN12771_c0_g1	400682.PAC_15719621	63	1.1e-38	ENOG410XR5H	S	Function unknown	Coiled-coil domain containing 6
TRINITY_DN12774_c0_g1	395495.Lcho_2566	45.6	1.4e-07	ENOG4111NJJ	M	Cell wall/membrane/envelope biogenesis	Outer membrane porin
TRINITY_DN12774_c0_g3	420662.Mpe_A3122	62.5	5.1e-19	ENOG4111FQM	M	Cell wall/membrane/envelope biogenesis	Gram-negative porin
TRINITY_DN12776_c0_g1	10228.TriadP27098	53.3	1e-32	COG0295	F	Nucleotide transport and metabolism	cytidine deaminase
TRINITY_DN12778_c0_g1	400682.PAC_15723156	67.9	1.3e-107	ENOG410YZXE	K	Transcription	paf1, RNA polymerase II associated factor, homolog (S. cerevisiae)
TRINITY_DN12778_c0_g2	6669.DappuP302221	58.2	8.1e-12	ENOG410YZXE	K	Transcription	paf1, RNA polymerase II associated factor, homolog (S. cerevisiae)
TRINITY_DN12783_c0_g2	395495.Lcho_1744	94.4	5.6e-42	COG2224	C	Energy production and conversion	Isocitrate lyase
TRINITY_DN12783_c0_g3	85643.Tmz1t_1247	95.6	3.1e-68	COG2224	C	Energy production and conversion	Isocitrate lyase
TRINITY_DN12786_c0_g1	400682.PAC_15716234	37.3	1.3e-44	ENOG4111I2R	S	Function unknown	kiaa1715
TRINITY_DN12787_c0_g1	400682.PAC_15722836	30.7	1.3e-17	NA	NA	NA	NA
TRINITY_DN12792_c0_g1	31033.ENSTRUP00000003035	35	1.6e-07	COG1194	L	Replication, recombination and repair	a g-specific adenine glycosylase
TRINITY_DN12793_c0_g1	400682.PAC_15709976	30.2	9.3e-07	NA	NA	NA	NA
TRINITY_DN12794_c0_g1	400682.PAC_15722212	45.3	8.1e-38	ENOG4111MD2	S	Function unknown	NA
TRINITY_DN12794_c0_g2	9739.ENSTTRP00000001490	68.9	1.3e-125	COG0042	J	Translation, ribosomal structure and biogenesis	Catalyzes the synthesis of dihydrouridine a modified base found in the D-loop of most tRNAs (By similarity)
TRINITY_DN12797_c0_g1	400682.PAC_15726790	42.3	8.5e-48	ENOG4111NQ7	S	Function unknown	Hydrolase
TRINITY_DN12799_c0_g3	400682.PAC_15721361	54.9	2.5e-153	ENOG410XQHF	S	Function unknown	stonin 2
TRINITY_DN12800_c0_g1	9685.ENSFCAP00000022248	41.9	2.3e-41	COG5273	S	Function unknown	Zinc finger, DHHC-type containing
TRINITY_DN12806_c1_g2	400682.PAC_15704084	43.2	6.1e-18	COG5147	K	Transcription	Myblike DNAbinding domain containing protein
TRINITY_DN12806_c2_g1	10020.ENSDORP00000002883	68.6	1e-31	ENOG4111QSW	K	Transcription	polymerase (DNA directed), epsilon 3, accessory subunit
TRINITY_DN12811_c0_g1	45351.NEMVEDRAFT_v1g178088-PA	83.9	5.6e-58	ENOG410Y0NU	O	Posttranslational modification, protein turnover, chaperones	ubiquitin-conjugating enzyme
TRINITY_DN12813_c0_g1	41431.PCC8801_3814	46.7	4.3e-22	ENOG410YU8T	S	Function unknown	NA
TRINITY_DN12815_c0_g1	400682.PAC_15705546	34.4	6.4e-24	ENOG410XYAV	S	Function unknown	Sequestosome 1
TRINITY_DN12816_c0_g1	6669.DappuP302942	30.4	6.6e-32	ENOG410ZPX7	O	Posttranslational modification, protein turnover, chaperones	Meprin A
TRINITY_DN12817_c0_g1	31033.ENSTRUP00000039005	32.7	1.8e-17	ENOG410XPW6	S	Function unknown	cms1 ribosomal small subunit homolog (yeast)
TRINITY_DN12818_c0_g2	400682.PAC_15712310	36	1.1e-42	COG2940	S	Function unknown	Histone-lysine N-methyltransferase
TRINITY_DN12818_c0_g3	8128.ENSONIP00000021606	28.7	2.1e-06	COG2940	S	Function unknown	Histone-lysine N-methyltransferase
TRINITY_DN12825_c0_g1	400682.PAC_15728172	38.7	7.1e-52	ENOG4111YVM	S	Function unknown	thymus, brain and testes associated
TRINITY_DN12828_c0_g1	400682.PAC_15712029	36.6	8.8e-20	ENOG410XSD2	S	Function unknown	G- protein-coupled receptor
TRINITY_DN12832_c0_g1	400682.PAC_15722622	61.5	3.9e-22	ENOG410ZWIP	S	Function unknown	MLX, MAX dimerization protein
TRINITY_DN12834_c0_g1	400682.PAC_15723462	29.8	6e-34	ENOG410ZZKM	S	Function unknown	Transmembrane protein 194A
TRINITY_DN12835_c0_g2	400682.PAC_15717677	49.3	4.8e-30	NA	NA	NA	NA
TRINITY_DN12838_c0_g1	400682.PAC_15719724	57	2.9e-38	COG0202	K	Transcription	DNA-dependent RNA polymerase catalyzes the transcription of DNA into RNA using the four ribonucleoside triphosphates as substrates (By similarity)
TRINITY_DN12840_c0_g1	9615.ENSCAFP00000018753	30.6	1.3e-08	ENOG410XNQC	S	Function unknown	beige BEACH domain containing protein
TRINITY_DN12841_c0_g1	400682.PAC_15717831	23.4	2.4e-21	ENOG410XTAN	S	Function unknown	Ring finger protein
TRINITY_DN12843_c0_g1	400682.PAC_15718430	80.9	5.8e-249	ENOG410XQ3Q	O	Posttranslational modification, protein turnover, chaperones	t-complex protein 1 subunit
TRINITY_DN12845_c1_g1	400682.PAC_15726050	51.7	3.6e-104	COG1735	S	Function unknown	phosphotriesterase-related protein
TRINITY_DN12846_c0_g1	400682.PAC_15718733	58.1	6.6e-54	COG1100	S	Function unknown	GTP-binding Protein
TRINITY_DN12847_c0_g1	400682.PAC_15727750	59	5e-99	COG0052	J	Translation, ribosomal structure and biogenesis	30S ribosomal protein S2
TRINITY_DN12850_c0_g1	400682.PAC_15709166	52.2	8.7e-73	COG3917	Q	Secondary metabolites biosynthesis, transport and catabolism	dsbA oxidoreductase
TRINITY_DN12851_c0_g1	400682.PAC_15722204	60.4	3.4e-229	ENOG410Y19E	S	Function unknown	WD repeat domain 16
TRINITY_DN12851_c0_g2	7739.JGI216428	42.7	3.5e-15	ENOG4111ND7	U	Intracellular trafficking, secretion, and vesicular transport	Ubiquitin-like protein involved in cytoplasm to vacuole transport (Cvt), autophagy vesicles formation, mitophagy, and nucleophagy. Conjugation with atg5 through an ubiquitin-like conjugating system involving also atg7 as an E1-like activating enzyme and atg10 as an E2-like conjugating enzyme, is essential for its function. The atg12-atg5 conjugate functions as an E3-like enzyme which is required …
TRINITY_DN12856_c0_g1	400682.PAC_15728353	96.2	5.2e-88	COG0639	T	Signal transduction mechanisms	serine threonine-protein phosphatase
TRINITY_DN12857_c0_g1	45351.NEMVEDRAFT_v1g165493-PA	80.2	2.9e-104	ENOG410XPQ8	O	Posttranslational modification, protein turnover, chaperones	The proteasome is a multicatalytic proteinase complex which is characterized by its ability to cleave peptides with Arg, Phe, Tyr, Leu, and Glu adjacent to the leaving group at neutral or slightly basic pH. The proteasome has an ATP-dependent proteolytic activity (By similarity)
TRINITY_DN12859_c0_g1	400682.PAC_15725194	35.4	4.6e-106	ENOG41117NJ	O	Posttranslational modification, protein turnover, chaperones	Tumor necrosis factor, alpha-induced protein 3
TRINITY_DN12862_c0_g1	10228.TriadP52685	37.1	1.5e-10	ENOG4111IJ9	J	Translation, ribosomal structure and biogenesis	Mitochondrial ribosomal protein S23
TRINITY_DN12863_c0_g1	7739.JGI67071	66.2	2.4e-16	ENOG41123P0	S	Function unknown	family with sequence similarity 133, member
TRINITY_DN12864_c1_g1	7955.ENSDARP00000117583	58.3	2.6e-21	ENOG41127WK	O	Posttranslational modification, protein turnover, chaperones	Selenoprotein W, 1
TRINITY_DN12866_c0_g1	59729.ENSTGUP00000001745	66.2	5.6e-174	COG0124	J	Translation, ribosomal structure and biogenesis	Histidyl-trna synthetase
TRINITY_DN12866_c0_g2	9685.ENSFCAP00000002066	39.2	7.4e-25	ENOG4111TWR	A	RNA processing and modification	Nuclear transport factor 2-like export factor 2
TRINITY_DN12867_c0_g1	8049.ENSGMOP00000018389	36.2	3.5e-22	ENOG410XQ06	U	Intracellular trafficking, secretion, and vesicular transport	wntless homolog (Drosophila)
TRINITY_DN12869_c0_g1	400682.PAC_15725678	92.2	1.3e-78	ENOG410XPGP	T	Signal transduction mechanisms	Casein Kinase
TRINITY_DN12871_c0_g2	400682.PAC_15725725	43.2	1.2e-44	ENOG410XZ7T	S	Function unknown	methylphosphate capping enzyme
TRINITY_DN12874_c0_g1	7739.JGI120524	35.8	2.8e-40	COG0010	E	Amino acid transport and metabolism	hydrolase activity, acting on carbon-nitrogen (but not peptide) bonds, in linear amidines
TRINITY_DN12875_c0_g1	400682.PAC_15710020	41.5	6.5e-20	NA	NA	NA	NA
TRINITY_DN12882_c0_g1	400682.PAC_15720343	29.4	5.9e-31	ENOG410ZS7W	S	Function unknown	CAP_GLY
TRINITY_DN12886_c0_g1	212717.CTC01478	45.4	1.5e-49	COG0076	E	Amino acid transport and metabolism	decarboxylase
TRINITY_DN12886_c0_g2	216895.VV2_1425	38.9	1.8e-59	COG0076	E	Amino acid transport and metabolism	decarboxylase
TRINITY_DN12889_c0_g1	400682.PAC_15710532	51.5	9.1e-99	COG0208	F	Nucleotide transport and metabolism	Provides the precursors necessary for DNA synthesis. Catalyzes the biosynthesis of deoxyribonucleotides from the corresponding ribonucleotides (By similarity)
TRINITY_DN12890_c0_g2	400682.PAC_15726989	40.6	2.1e-150	ENOG410ZQCN	S	Function unknown	fg-gap repeat protein
TRINITY_DN12891_c0_g2	45351.NEMVEDRAFT_v1g204972-PA	47.9	3.6e-84	COG2971	G	Carbohydrate transport and metabolism	BadF BadG BcrA BcrD
TRINITY_DN12892_c0_g1	7668.SPU_026050tr	84.1	2.8e-226	COG1894	C	Energy production and conversion	Nadh dehydrogenase
TRINITY_DN12892_c0_g2	400682.PAC_15720906	55.4	1.1e-64	ENOG410ZASV	S	Function unknown	NA
TRINITY_DN12896_c0_g1	400682.PAC_15727828	34.8	1.3e-17	ENOG410XS5C	S	Function unknown	Zinc finger, ZZ-type with EF-hand domain 1
TRINITY_DN12899_c0_g1	336963.XP_002543838.1	27.3	2.2e-20	ENOG4112A4U	S	Function unknown	NA
TRINITY_DN12900_c0_g2	7739.JGI79014	45.8	2.1e-31	COG5021	O	Posttranslational modification, protein turnover, chaperones	ubiquitin protein ligase
TRINITY_DN12901_c0_g1	400682.PAC_15716219	28.9	6.1e-24	NA	NA	NA	NA
TRINITY_DN12907_c0_g1	9031.ENSGALP00000029808	35.4	1.1e-18	COG5102	U	Intracellular trafficking, secretion, and vesicular transport	SFT2 domain containing
TRINITY_DN12908_c0_g1	51511.ENSCSAVP00000004929	56.5	3.6e-147	ENOG410XPN7	O	Posttranslational modification, protein turnover, chaperones	katanin p60
TRINITY_DN12910_c0_g1	400682.PAC_15726687	65.4	1.5e-09	ENOG410XSTY	S	Function unknown	Latent transforming growth factor beta binding protein 2
TRINITY_DN12912_c0_g1	13735.ENSPSIP00000006429	74.4	1.1e-96	COG1905	C	Energy production and conversion	Nadh dehydrogenase
TRINITY_DN12912_c1_g1	69293.ENSGACP00000020697	47.4	7.3e-29	COG4229	C	Energy production and conversion	Bifunctional enzyme that catalyzes the enolization of 2,3-diketo-5-methylthiopentyl-1-phosphate (DK-MTP-1-P) into the intermediate 2-hydroxy-3-keto-5-methylthiopentenyl-1-phosphate (HK-MTPenyl-1-P), which is then dephosphorylated to form the acireductone 1,2-dihydroxy-3-keto-5-methylthiopentene (DHK-MTPene) (By similarity)
TRINITY_DN12915_c0_g3	7668.SPU_017072tr	49.4	1.8e-40	ENOG410XPUI	S	Function unknown	member RAS oncogene family
TRINITY_DN12916_c0_g1	400682.PAC_15716955	52.4	3.9e-54	COG0484	O	Posttranslational modification, protein turnover, chaperones	ATP binding to DnaK triggers the release of the substrate protein, thus completing the reaction cycle. Several rounds of ATP-dependent interactions between DnaJ, DnaK and GrpE are required for fully efficient folding. Also involved, together with DnaK and GrpE, in the DNA replication of plasmids through activation of initiation proteins (By similarity)
TRINITY_DN12920_c0_g1	9646.ENSAMEP00000006732	85.7	1.6e-35	ENOG410XRHN	O	Posttranslational modification, protein turnover, chaperones	endosome to lysosome transport via multivesicular body sorting pathway
TRINITY_DN12922_c3_g1	7668.SPU_022509tr	52.2	2.7e-12	COG2801	L	Replication, recombination and repair	Retrotransposon protein
TRINITY_DN12922_c3_g3	400682.PAC_15704675	39.7	3.5e-38	COG2801	L	Replication, recombination and repair	Retrotransposon protein
TRINITY_DN12923_c0_g1	400682.PAC_15723564	39.8	2.1e-51	COG0666	S	Function unknown	Ankyrin Repeat
TRINITY_DN12924_c0_g1	400682.PAC_15726513	44.1	9.1e-113	COG0175	P	Inorganic ion transport and metabolism	Reduction of activated sulfate into sulfite (By similarity)
TRINITY_DN12924_c0_g1	400682.PAC_15726513	44.1	9.1e-113	COG1058	H	Coenzyme transport and metabolism	competence damage-inducible protein
TRINITY_DN12925_c0_g1	400682.PAC_15718772	60	2.2e-49	ENOG4110YU0	O	Posttranslational modification, protein turnover, chaperones	Glutathione S-transferase, mu
TRINITY_DN12926_c0_g1	400682.PAC_15719430	46.9	4.3e-26	ENOG4111IJ7	S	Function unknown	Chromosome 15 open reading frame 26
TRINITY_DN12928_c0_g1	45351.NEMVEDRAFT_v1g136525-PA	33.6	3.5e-39	COG5184	D	Cell cycle control, cell division, chromosome partitioning	regulator of chromosome condensation
TRINITY_DN12928_c0_g1	45351.NEMVEDRAFT_v1g136525-PA	33.6	3.5e-39	COG5184	Z	Cytoskeleton	regulator of chromosome condensation
TRINITY_DN12931_c0_g1	400682.PAC_15715876	58.2	4.3e-10	ENOG410Z1IF	S	Function unknown	GMC oxidoreductase
TRINITY_DN12932_c0_g1	400682.PAC_15712346	60.1	2.6e-51	ENOG4111JX3	S	Function unknown	COMM domain containing 10
TRINITY_DN12933_c0_g1	400682.PAC_15727940	65.5	6.2e-53	COG5078	O	Posttranslational modification, protein turnover, chaperones	ubiquitin-conjugating enzyme
TRINITY_DN12934_c0_g1	7668.SPU_008326tr	56.8	6.6e-18	COG2801	L	Replication, recombination and repair	Retrotransposon protein
TRINITY_DN12938_c0_g1	400682.PAC_15712956	90.1	1.4e-67	COG5030	U	Intracellular trafficking, secretion, and vesicular transport	Adaptor-related protein complex
TRINITY_DN12939_c0_g1	45351.NEMVEDRAFT_v1g192736-PA	53.7	2.1e-95	ENOG410XRH2	U	Intracellular trafficking, secretion, and vesicular transport	The coatomer is a cytosolic protein complex that binds to dilysine motifs and reversibly associates with Golgi non- clathrin-coated vesicles, which further mediate biosynthetic protein transport from the ER, via the Golgi up to the trans Golgi network. Coatomer complex is required for budding from Golgi membranes, and is essential for the retrograde Golgi-to-ER transport of dilysine-tagged protei…
TRINITY_DN12939_c0_g2	400682.PAC_15720173	83.8	1.6e-25	ENOG4111UAT	K	Transcription	sequence-specific DNA binding
TRINITY_DN12939_c0_g3	7739.JGI260557	78.9	3.7e-68	ENOG410XRH2	U	Intracellular trafficking, secretion, and vesicular transport	The coatomer is a cytosolic protein complex that binds to dilysine motifs and reversibly associates with Golgi non- clathrin-coated vesicles, which further mediate biosynthetic protein transport from the ER, via the Golgi up to the trans Golgi network. Coatomer complex is required for budding from Golgi membranes, and is essential for the retrograde Golgi-to-ER transport of dilysine-tagged protei…
TRINITY_DN12940_c0_g1	400682.PAC_15722124	65.5	9.8e-112	ENOG410XNX8	S	Function unknown	kelch-like
TRINITY_DN12940_c0_g3	59463.ENSMLUP00000001361	50	3.8e-06	ENOG410XNX8	S	Function unknown	kelch-like
TRINITY_DN12943_c0_g1	352914.XP_728215.1	80.7	4.7e-33	NA	NA	NA	NA
TRINITY_DN12953_c0_g1	9305.ENSSHAP00000001225	35.6	2.9e-06	ENOG41122TX	S	Function unknown	Fas (tnfrsf6)-associated via death domain
TRINITY_DN12957_c0_g1	400682.PAC_15721556	55.9	1.3e-133	COG0666	S	Function unknown	Ankyrin Repeat
TRINITY_DN12958_c0_g1	400682.PAC_15717754	40.8	8.3e-94	ENOG4111IGY	K	Transcription	E2F transcription factor
TRINITY_DN12963_c0_g2	400682.PAC_15713105	42.1	6.7e-129	COG0154	J	Translation, ribosomal structure and biogenesis	Allows the formation of correctly charged Gln-tRNA(Gln) through the transamidation of misacylated Glu-tRNA(Gln) in organisms which lack glutaminyl-tRNA synthetase. The reaction takes place in the presence of glutamine and ATP through an activated gamma-phospho-Glu-tRNA(Gln) (By similarity)
TRINITY_DN12969_c0_g1	400682.PAC_15727828	42.1	6.1e-18	ENOG410XS5C	S	Function unknown	Zinc finger, ZZ-type with EF-hand domain 1
TRINITY_DN12971_c0_g1	4641.GSMUA_Achr11P23990_001	53.5	6.8e-15	ENOG410XWQ1	S	Function unknown	Curculin domain protein (Mannose-binding) lectin
TRINITY_DN12972_c0_g2	7739.JGI124207	38	6.4e-61	ENOG410ZEEQ	S	Function unknown	downstream neighbor of Son
TRINITY_DN12972_c0_g4	400682.PAC_15718921	83.5	1.4e-51	COG1383	J	Translation, ribosomal structure and biogenesis	Ribosomal protein
TRINITY_DN12973_c0_g1	400682.PAC_15718204	82.5	1.2e-210	COG1503	J	Translation, ribosomal structure and biogenesis	Peptide Chain Release Factor
TRINITY_DN12978_c0_g1	400682.PAC_15725914	32.2	4.7e-42	ENOG410XTAN	S	Function unknown	Ring finger protein
TRINITY_DN12980_c0_g1	388400.BB14905_20885	77.1	3.7e-07	NA	NA	NA	NA
TRINITY_DN12981_c0_g1	400682.PAC_15721194	74.1	8.5e-11	NA	NA	NA	NA
TRINITY_DN12989_c0_g3	121225.PHUM047070-PA	43.6	1.8e-18	COG1331	O	Posttranslational modification, protein turnover, chaperones	mannose-6-phosphate isomerase activity
TRINITY_DN12990_c0_g1	400682.PAC_15722721	62.3	5.1e-58	ENOG4111Q5H	S	Function unknown	Rieske (Fe-S) domain containing
TRINITY_DN12995_c1_g2	400682.PAC_15722792	36.8	6.5e-24	NA	NA	NA	NA
TRINITY_DN12998_c0_g4	400682.PAC_15724325	37.2	1.6e-10	NA	NA	NA	NA
TRINITY_DN13003_c0_g2	7757.ENSPMAP00000010322	32.7	9.7e-27	ENOG410XVKN	S	Function unknown	Abelson helper integration site 1
TRINITY_DN13003_c0_g3	400682.PAC_15724737	66.3	2.9e-128	ENOG410XRBG	S	Function unknown	Mitotic checkpoint protein
TRINITY_DN13005_c0_g1	9371.ENSETEP00000006246	24.4	9.5e-23	ENOG410YGWX	S	Function unknown	Acid phosphatase-like 2
TRINITY_DN13006_c0_g1	400682.PAC_15723064	39.2	1.9e-33	ENOG4111R2U	S	Function unknown	chromosome 2 open reading frame 61
TRINITY_DN13009_c1_g1	400682.PAC_15709398	45.4	1.3e-101	ENOG410XRXK	K	Transcription	Tnf receptor-associated factor 2
TRINITY_DN1300_c0_g1	3847.GLYMA15G15800.1	93.4	1e-34	ENOG4112266	J	Translation, ribosomal structure and biogenesis	40S ribosomal protein S21
TRINITY_DN13014_c0_g1	400682.PAC_15720299	28	2.1e-41	ENOG41121FU	S	Function unknown	NA
TRINITY_DN13016_c0_g1	7668.SPU_027089tr	50.8	2.5e-143	ENOG410XPYW	S	Function unknown	lipase maturation factor
TRINITY_DN13019_c0_g1	7719.ENSCINP00000019198	54	1.8e-101	COG1063	E	Amino acid transport and metabolism	Dehydrogenase
TRINITY_DN13020_c0_g1	400682.PAC_15726777	78.6	8.2e-246	COG0459	O	Posttranslational modification, protein turnover, chaperones	Prevents misfolding and promotes the refolding and proper assembly of unfolded polypeptides generated under stress conditions (By similarity)
TRINITY_DN13023_c0_g1	400682.PAC_15720732	58.5	5.4e-53	COG0631	T	Signal transduction mechanisms	Phosphatase
TRINITY_DN13024_c0_g1	400682.PAC_15711801	43.4	9.6e-61	COG3386	G	Carbohydrate transport and metabolism	SMP-30 gluconolaconase LRE domain protein
TRINITY_DN13026_c0_g1	400682.PAC_15716161	77.6	1.1e-73	ENOG410XQYZ	O	Posttranslational modification, protein turnover, chaperones	potassium channel tetramerisation domain containing
TRINITY_DN13026_c0_g3	400682.PAC_15716159	70.2	1.6e-39	ENOG4111NRP	U	Intracellular trafficking, secretion, and vesicular transport	intraflagellar transport 20 homolog (Chlamydomonas)
TRINITY_DN13027_c1_g1	8364.ENSXETP00000000297	52.2	2.8e-60	COG5197	S	Function unknown	yip1 interacting factor homolog
TRINITY_DN13028_c0_g1	400682.PAC_15715530	38.6	1.2e-16	ENOG410Y4W8	S	Function unknown	NA
TRINITY_DN13032_c0_g1	400682.PAC_15718735	81	6.8e-38	ENOG4111NTV	A	RNA processing and modification	Splicing factor 3b subunit
TRINITY_DN13033_c0_g1	45351.NEMVEDRAFT_v1g235919-PA	35.6	2.6e-35	ENOG41100SS	U	Intracellular trafficking, secretion, and vesicular transport	Metaxin 3
TRINITY_DN13034_c0_g1	400682.PAC_15721081	41	3e-31	COG1813	K	Transcription	Factor 1
TRINITY_DN13035_c0_g1	69293.ENSGACP00000019720	39	1.4e-78	COG2103	S	Function unknown	Specifically catalyzes the cleavage of the D-lactyl ether substituent of MurNAc 6-phosphate, producing GlcNAc 6- phosphate and D-lactate
TRINITY_DN13037_c0_g1	7757.ENSPMAP00000008149	28.5	2.7e-10	ENOG410XQX7	S	Function unknown	down syndrome cell adhesion molecule
TRINITY_DN13038_c0_g1	400682.PAC_15712771	59.7	1.6e-33	COG0474	P	Inorganic ion transport and metabolism	P-type atpase
TRINITY_DN13040_c0_g1	400682.PAC_15717448	46.6	1.7e-52	COG5590	S	Function unknown	ubiquinone biosynthesis protein Coq9
TRINITY_DN13042_c1_g3	7739.JGI69715	47.9	3e-75	COG5024	D	Cell cycle control, cell division, chromosome partitioning	g2 mitotic-specific
TRINITY_DN13043_c0_g3	400682.PAC_15712678	91.7	1.3e-59	ENOG4111IHX	A	RNA processing and modification	premRNA branch site protein
TRINITY_DN13044_c0_g1	400682.PAC_15716017	42.9	9.1e-82	ENOG410YBCX	S	Function unknown	Membrane
TRINITY_DN13045_c0_g1	400682.PAC_15727874	88.9	2.4e-163	ENOG410XPGP	T	Signal transduction mechanisms	Casein Kinase
TRINITY_DN13045_c0_g2	30611.ENSOGAP00000017881	67	4.6e-71	COG5211	K	Transcription	RNA polymerase II subunit A C-terminal domain phosphatase
TRINITY_DN13048_c0_g1	400682.PAC_15722368	50.3	1.6e-71	ENOG410XNYI	K	Transcription	E2F transcription factor
TRINITY_DN13049_c0_g1	400682.PAC_15728205	40.5	7.7e-28	ENOG410XR88	S	Function unknown	semaphorin receptor activity
TRINITY_DN13050_c0_g2	7739.JGI117517	38.5	7.4e-13	ENOG4110CDI	S	Function unknown	tigger transposable element derived
TRINITY_DN13051_c0_g1	400682.PAC_15727776	71	7.2e-22	COG0666	S	Function unknown	Ankyrin Repeat
TRINITY_DN13054_c0_g1	6085.XP_002159962	40.4	1.4e-30	COG0039	C	Energy production and conversion	Catalyzes the reversible oxidation of malate to oxaloacetate (By similarity)
TRINITY_DN13055_c0_g1	400682.PAC_15717615	53.4	4.2e-129	COG0661	S	Function unknown	Required, probably indirectly, for the hydroxylation of 2-octaprenylphenol to 2-octaprenyl-6-hydroxy-phenol, the fourth step in ubiquinone biosynthesis (By similarity)
TRINITY_DN13056_c0_g1	99883.ENSTNIP00000014837	50.5	7.8e-51	COG5100	Y	Nuclear structure	Nuclear protein localization
TRINITY_DN13056_c0_g2	7739.JGI126926	51.8	2.8e-74	COG5100	Y	Nuclear structure	Nuclear protein localization
TRINITY_DN13061_c0_g1	400682.PAC_15725159	51.4	2.4e-79	ENOG410XNZY	U	Intracellular trafficking, secretion, and vesicular transport	NADPH Oxidase
TRINITY_DN13064_c0_g1	3055.EDP02003	35.2	3.5e-32	ENOG410YJ3R	O	Posttranslational modification, protein turnover, chaperones	glutathione Stransferase
TRINITY_DN13065_c0_g1	400682.PAC_15727402	49.8	2.2e-90	ENOG410ZRQ7	O	Posttranslational modification, protein turnover, chaperones	serine-type endopeptidase activity
TRINITY_DN13066_c0_g1	400682.PAC_15727454	44.9	1.1e-61	COG2267	I	Lipid transport and metabolism	alpha beta hydrolase fold
TRINITY_DN13070_c0_g1	8128.ENSONIP00000008525	27.4	7.2e-08	ENOG410XS2S	U	Intracellular trafficking, secretion, and vesicular transport	docking protein
TRINITY_DN13074_c0_g1	7719.ENSCINP00000032382	33	1.8e-26	ENOG4111RAN	S	Function unknown	chromosome 7 open reading frame 72
TRINITY_DN13076_c0_g1	400682.PAC_15726524	48	7.4e-97	ENOG410XNTW	S	Function unknown	CUGBP, Elav-like family member
TRINITY_DN13076_c0_g2	7739.JGI129910	34.9	5.3e-40	ENOG4111F8A	S	Function unknown	NA
TRINITY_DN13077_c0_g1	400682.PAC_15728456	48	5.7e-18	COG3555	O	Posttranslational modification, protein turnover, chaperones	beta-hydroxylase
TRINITY_DN13077_c0_g2	400682.PAC_15728456	75.7	6.3e-10	COG3555	O	Posttranslational modification, protein turnover, chaperones	beta-hydroxylase
TRINITY_DN13077_c0_g3	400682.PAC_15728456	57.6	2.2e-86	COG3555	O	Posttranslational modification, protein turnover, chaperones	beta-hydroxylase
TRINITY_DN13080_c0_g1	400682.PAC_15711522	57	2e-89	ENOG4111GH8	H	Coenzyme transport and metabolism	Catalyzes the oxidative ring opening of 3- hydroxyanthranilate to 2-amino-3-carboxymuconate semialdehyde, which spontaneously cyclizes to quinolinate (By similarity)
TRINITY_DN13084_c0_g1	400682.PAC_15720917	85.2	4.3e-73	COG2147	J	Translation, ribosomal structure and biogenesis	ribosomal protein L19
TRINITY_DN13086_c0_g1	400682.PAC_15723943	47.1	2.8e-11	NA	NA	NA	NA
TRINITY_DN13095_c0_g1	400682.PAC_15713270	69.5	1.4e-114	ENOG410XP8B	S	Function unknown	RING finger protein
TRINITY_DN13096_c0_g1	4558.Sb01g024221.1	80	5.6e-10	ENOG410Y2ES	S	Function unknown	NA
TRINITY_DN13096_c0_g15	4555.Si020754m	96.1	5.1e-36	COG1009	C	Energy production and conversion	subunit l
TRINITY_DN13096_c0_g4	3847.GLYMA13G11810.1	69.5	9.3e-57	ENOG4111JHC	S	Function unknown	senescence-associated protein
TRINITY_DN13096_c0_g7	3702.ATMG00060.1	97.9	8.9e-46	COG1009	C	Energy production and conversion	subunit l
TRINITY_DN13096_c0_g9	29760.VIT_00s1739g00010.t01	96.7	1.3e-43	ENOG410YJTT	S	Function unknown	NA
TRINITY_DN13097_c0_g1	400682.PAC_15710370	65.3	8.5e-50	COG0200	J	Translation, ribosomal structure and biogenesis	Binds to the 23S rRNA (By similarity)
TRINITY_DN13099_c0_g1	400682.PAC_15719934	39.6	4.5e-72	ENOG410Y3YU	S	Function unknown	Coiled-coil domain containing 109B
TRINITY_DN1309_c0_g1	70448.Q014K1	81.3	9.2e-30	COG2126	J	Translation, ribosomal structure and biogenesis	Binds to the 23S rRNA (By similarity)
TRINITY_DN13100_c0_g1	400682.PAC_15728369	22.9	2.9e-10	ENOG410Z7WB	S	Function unknown	NA
TRINITY_DN13103_c0_g2	3702.AT1G50310.1	52	3.3e-48	ENOG410XNQK	G	Carbohydrate transport and metabolism	Transporter
TRINITY_DN13103_c0_g3	88036.EFJ37602	58.4	3.3e-46	ENOG410XNQK	G	Carbohydrate transport and metabolism	Transporter
TRINITY_DN13104_c0_g1	400682.PAC_15721574	50.2	2.4e-93	COG1409	S	Function unknown	Hydrolyzes cAMP to 5'-AMP. Plays an important regulatory role in modulating the intracellular concentration of cAMP, thereby influencing cAMP-dependent processes (By similarity)
TRINITY_DN13105_c0_g1	10090.ENSMUSP00000030731	58.5	2.2e-31	COG5624	K	Transcription	TAF12 RNA polymerase II, TATA box binding protein (TBP)-associated factor
TRINITY_DN13105_c0_g2	400682.PAC_15715127	40	2.1e-57	COG5193	J	Translation, ribosomal structure and biogenesis	La ribonucleoprotein domain family member
TRINITY_DN13105_c0_g2	400682.PAC_15715127	40	2.1e-57	COG5193	O	Posttranslational modification, protein turnover, chaperones	La ribonucleoprotein domain family member
TRINITY_DN13111_c0_g2	400682.PAC_15720613	47.2	5.6e-124	COG1055	P	Inorganic ion transport and metabolism	arsenical pump membrane protein
TRINITY_DN13115_c0_g2	400682.PAC_15710726	70.3	4.5e-07	ENOG410YCCP	S	Function unknown	member RAS oncogene family
TRINITY_DN13116_c0_g1	400682.PAC_15726518	52.2	1.1e-22	COG0697	E	Amino acid transport and metabolism	membrane
TRINITY_DN13116_c0_g1	400682.PAC_15726518	52.2	1.1e-22	COG0697	G	Carbohydrate transport and metabolism	membrane
TRINITY_DN13118_c0_g2	10228.TriadP53074	29.9	2.7e-35	ENOG411028N	O	Posttranslational modification, protein turnover, chaperones	Tectonic family member 1
TRINITY_DN13119_c1_g1	4113.PGSC0003DMT400095587	73.1	1.3e-37	NA	NA	NA	NA
TRINITY_DN13120_c0_g1	448385.sce9254	38.4	1.4e-27	COG0702	G	Carbohydrate transport and metabolism	epimerase dehydratase
TRINITY_DN13120_c0_g1	448385.sce9254	38.4	1.4e-27	COG0702	M	Cell wall/membrane/envelope biogenesis	epimerase dehydratase
TRINITY_DN13122_c0_g2	45351.NEMVEDRAFT_v1g244257-PA	39	3.7e-28	COG5185	D	Cell cycle control, cell division, chromosome partitioning	NDC80 kinetochore complex component, homolog (S. cerevisiae)
TRINITY_DN13127_c0_g1	400682.PAC_15724064	42.1	2.8e-38	COG5034	B	Chromatin structure and dynamics	Inhibitor of growth family member
TRINITY_DN13129_c0_g1	400682.PAC_15715714	41.5	5.1e-32	ENOG4111SYH	S	Function unknown	Peroxisomal membrane protein
TRINITY_DN13130_c0_g1	400682.PAC_15708037	44.6	2e-39	ENOG410ZYS4	S	Function unknown	fibrinogen
TRINITY_DN13132_c0_g2	400682.PAC_15720462	83.6	6.6e-224	COG0513	L	Replication, recombination and repair	purine NTP-dependent helicase activity
TRINITY_DN13133_c0_g2	400682.PAC_15723603	40.4	2.2e-52	ENOG41109T1	S	Function unknown	Chromosome 12 open reading frame 66
TRINITY_DN13134_c0_g1	10228.TriadP63455	53.2	1.1e-94	COG5206	O	Posttranslational modification, protein turnover, chaperones	phosphatidylinositol glycan anchor biosynthesis, class K
TRINITY_DN13135_c0_g1	400682.PAC_15714106	64.4	5e-38	ENOG4111IKY	U	Intracellular trafficking, secretion, and vesicular transport	transmembrane protein 66
TRINITY_DN13138_c0_g1	445335.CBN_0041	44.9	3e-09	ENOG4112ASD	S	Function unknown	NA
TRINITY_DN13140_c0_g1	400682.PAC_15726811	32.2	4e-82	NA	NA	NA	NA
TRINITY_DN13144_c0_g2	400682.PAC_15726205	51.3	3.8e-34	COG5273	S	Function unknown	Zinc finger, DHHC-type containing
TRINITY_DN13145_c0_g1	400682.PAC_15717350	51.1	8.1e-80	COG5333	D	Cell cycle control, cell division, chromosome partitioning	Component of the Mediator complex, a coactivator involved in regulated gene transcription of nearly all RNA polymerase II-dependent genes. Mediator functions as a bridge to convey information from gene-specific regulatory proteins to the basal RNA polymerase II transcription machinery. Mediator is recruited to promoters by direct interactions with regulatory proteins and serves as a scaffold for …
TRINITY_DN13145_c0_g1	400682.PAC_15717350	51.1	8.1e-80	COG5333	K	Transcription	Component of the Mediator complex, a coactivator involved in regulated gene transcription of nearly all RNA polymerase II-dependent genes. Mediator functions as a bridge to convey information from gene-specific regulatory proteins to the basal RNA polymerase II transcription machinery. Mediator is recruited to promoters by direct interactions with regulatory proteins and serves as a scaffold for …
TRINITY_DN13145_c0_g1	400682.PAC_15717350	51.1	8.1e-80	COG5333	L	Replication, recombination and repair	Component of the Mediator complex, a coactivator involved in regulated gene transcription of nearly all RNA polymerase II-dependent genes. Mediator functions as a bridge to convey information from gene-specific regulatory proteins to the basal RNA polymerase II transcription machinery. Mediator is recruited to promoters by direct interactions with regulatory proteins and serves as a scaffold for …
TRINITY_DN13145_c0_g2	400682.PAC_15716164	72	1.1e-44	COG0693	S	Function unknown	PfpI family
TRINITY_DN13147_c0_g1	8128.ENSONIP00000018942	36	7.9e-25	ENOG410YX2A	U	Intracellular trafficking, secretion, and vesicular transport	StAR-related lipid transfer (START) domain containing 5
TRINITY_DN13150_c0_g1	400682.PAC_15716397	65.2	1.5e-27	ENOG4112539	O	Posttranslational modification, protein turnover, chaperones	mitochondrial import inner membrane, translocase subunit
TRINITY_DN13150_c1_g1	400682.PAC_15725290	57.8	5.3e-103	COG1272	S	Function unknown	Channel protein (Hemolysin III family
TRINITY_DN13151_c0_g1	6085.XP_002168623	50.3	2.6e-35	ENOG410XQ1Y	S	Function unknown	zinc finger
TRINITY_DN13152_c0_g1	400682.PAC_15708885	37.8	2.5e-31	ENOG410ZQXM	S	Function unknown	NA
TRINITY_DN13153_c1_g1	3711.Bra010149.1-P	58.9	1.1e-06	ENOG410Y2ES	S	Function unknown	NA
TRINITY_DN13155_c0_g1	400682.PAC_15722217	40.3	2.1e-23	COG1215	M	Cell wall/membrane/envelope biogenesis	Glycosyl transferase, family 2
TRINITY_DN13157_c1_g1	400682.PAC_15718068	53.8	4.5e-79	ENOG4111JSU	S	Function unknown	cytochrome b5 domain containing 2
TRINITY_DN13159_c0_g2	135651.CBN22911	62.2	1.6e-62	COG5078	O	Posttranslational modification, protein turnover, chaperones	ubiquitin-conjugating enzyme
TRINITY_DN13161_c0_g1	400682.PAC_15705773	31	1.6e-44	COG5059	Z	Cytoskeleton	Kinesin family member
TRINITY_DN13166_c0_g1	400682.PAC_15717586	49.1	2.9e-63	COG0625	O	Posttranslational modification, protein turnover, chaperones	glutathione Stransferase
TRINITY_DN13166_c0_g2	51511.ENSCSAVP00000008994	91.5	4e-38	COG2051	J	Translation, ribosomal structure and biogenesis	40s ribosomal protein S27
TRINITY_DN13166_c0_g3	7668.SPU_012239tr	31.1	1.2e-23	ENOG411291V	A	RNA processing and modification	Nonhomologous end-joining factor 1
TRINITY_DN13167_c0_g1	45351.NEMVEDRAFT_v1g163923-PA	62	1.2e-41	ENOG410ZHUT	S	Function unknown	TNF receptor-associated factor 3 interacting protein 1
TRINITY_DN13168_c0_g1	4081.Solyc01g060300.1.1	58.3	5.1e-06	COG5068	K	Transcription	Transcription factor
TRINITY_DN13169_c0_g1	400682.PAC_15721514	55.9	7.6e-43	ENOG41118KQ	S	Function unknown	ER membrane protein complex subunit 4
TRINITY_DN13169_c0_g2	400682.PAC_15721591	47.6	4.6e-110	ENOG410XQBR	S	Function unknown	kiaa1147
TRINITY_DN13171_c1_g1	400682.PAC_15703491	66.7	3.1e-44	COG5596	O	Posttranslational modification, protein turnover, chaperones	mitochondrial import inner membrane translocase, subunit
TRINITY_DN13173_c0_g1	400682.PAC_15715266	44.9	1.6e-27	ENOG4111MU8	S	Function unknown	chromosome 1 open reading frame 158
TRINITY_DN13175_c0_g1	7739.JGI117100	47.3	2.4e-56	ENOG410XQAH	S	Function unknown	MIT, microtubule interacting and transport, domain containing 1
TRINITY_DN13176_c0_g1	7955.ENSDARP00000026849	40.6	2.9e-46	ENOG410YXX7	S	Function unknown	axin interactor, dorsalization associated
TRINITY_DN13177_c0_g1	9913.ENSBTAP00000052557	69.2	3.6e-36	COG5126	D	Cell cycle control, cell division, chromosome partitioning	Calcium-binding protein
TRINITY_DN13177_c0_g1	9913.ENSBTAP00000052557	69.2	3.6e-36	COG5126	T	Signal transduction mechanisms	Calcium-binding protein
TRINITY_DN13177_c0_g1	9913.ENSBTAP00000052557	69.2	3.6e-36	COG5126	Z	Cytoskeleton	Calcium-binding protein
TRINITY_DN13179_c0_g1	45351.NEMVEDRAFT_v1g195152-PA	73.7	2.1e-87	COG2007	J	Translation, ribosomal structure and biogenesis	40S ribosomal protein S8
TRINITY_DN1317_c0_g1	45351.NEMVEDRAFT_v1g131067-PA	71.2	3.8e-18	ENOG4111TYH	J	Translation, ribosomal structure and biogenesis	ribosomal protein, L30
TRINITY_DN13180_c0_g1	9986.ENSOCUP00000026040	58.9	1.4e-128	COG0484	O	Posttranslational modification, protein turnover, chaperones	ATP binding to DnaK triggers the release of the substrate protein, thus completing the reaction cycle. Several rounds of ATP-dependent interactions between DnaJ, DnaK and GrpE are required for fully efficient folding. Also involved, together with DnaK and GrpE, in the DNA replication of plasmids through activation of initiation proteins (By similarity)
TRINITY_DN13185_c0_g3	400682.PAC_15725289	71.6	3.6e-71	ENOG4111FTG	S	Function unknown	protein 2 3 complex, subunit
TRINITY_DN13187_c0_g1	135651.CBN17556	44.4	1.7e-102	COG0526	O	Posttranslational modification, protein turnover, chaperones	Thioredoxin
TRINITY_DN13188_c0_g1	400682.PAC_15723104	57.2	3e-51	ENOG4111FEN	S	Function unknown	NA
TRINITY_DN13189_c0_g1	400682.PAC_15726032	38.9	6.8e-07	ENOG410XQBM	S	Function unknown	Integrin, alpha 9
TRINITY_DN13192_c0_g1	400682.PAC_15712452	44.1	8.3e-32	ENOG410XPUI	S	Function unknown	member RAS oncogene family
TRINITY_DN13194_c0_g2	400682.PAC_15725684	33.3	3.1e-13	COG5048	S	Function unknown	Zinc finger protein
TRINITY_DN13196_c0_g2	400682.PAC_15727828	33.4	4e-97	ENOG410XS5C	S	Function unknown	Zinc finger, ZZ-type with EF-hand domain 1
TRINITY_DN13197_c0_g1	400682.PAC_15716810	32.9	6e-38	ENOG410XNQC	S	Function unknown	beige BEACH domain containing protein
TRINITY_DN13198_c0_g1	31033.ENSTRUP00000014035	47.4	4.1e-47	COG2039	O	Posttranslational modification, protein turnover, chaperones	Removes 5-oxoproline from various penultimate amino acid residues except L-proline (By similarity)
TRINITY_DN13199_c0_g1	8083.ENSXMAP00000007198	37.6	1.1e-41	COG0584	C	Energy production and conversion	glycerophosphoryl diester phosphodiesterase
TRINITY_DN13203_c0_g1	400682.PAC_15717989	63.9	8.2e-105	ENOG41123C5	S	Function unknown	NA
TRINITY_DN13204_c0_g3	7897.ENSLACP00000009340	65	5.2e-12	ENOG410YDXC	S	Function unknown	Coiled-coil domain containing 77
TRINITY_DN13205_c0_g1	400682.PAC_15724080	44.5	4.5e-61	ENOG410XRAP	S	Function unknown	Regulation of nuclear pre-mRNA domain containing
TRINITY_DN13207_c0_g1	3702.AT3G09390.1	71.7	1e-07	ENOG410Z616	S	Function unknown	metallothionein-like protein
TRINITY_DN13209_c0_g1	400682.PAC_15723387	61.4	6.4e-128	COG0404	E	Amino acid transport and metabolism	The glycine cleavage system catalyzes the degradation of glycine (By similarity)
TRINITY_DN1320_c0_g1	3847.GLYMA07G15800.2	86.7	1.7e-23	ENOG410Z616	S	Function unknown	metallothionein-like protein
TRINITY_DN13211_c0_g1	400682.PAC_15724023	49.6	2.9e-56	ENOG410XPMQ	K	Transcription	homeobox
TRINITY_DN13215_c0_g1	400682.PAC_15704274	74.4	3.3e-90	COG1499	J	Translation, ribosomal structure and biogenesis	60S ribosomal export protein Nmd3
TRINITY_DN13216_c0_g1	400682.PAC_15728142	41.2	2e-25	ENOG410ZZJZ	K	Transcription	cAMP responsive element
TRINITY_DN13217_c0_g2	400682.PAC_15718828	45	4.9e-76	COG5210	S	Function unknown	TBC1 domain family member
TRINITY_DN13217_c0_g3	400682.PAC_15718834	44.7	1.9e-64	COG1594	K	Transcription	DNA-dependent RNA polymerase catalyzes the transcription of DNA into RNA using the four ribonucleoside triphosphates as substrates (By similarity)
TRINITY_DN13218_c0_g1	3847.GLYMA10G07831.1	65.5	9.2e-13	NA	NA	NA	NA
TRINITY_DN13218_c0_g2	3847.GLYMA10G07831.1	56.3	1.4e-15	NA	NA	NA	NA
TRINITY_DN13218_c0_g3	3847.GLYMA10G07831.1	67.7	3.9e-14	NA	NA	NA	NA
TRINITY_DN13219_c0_g2	400682.PAC_15728559	76.4	3.2e-74	ENOG410YKQK	S	Function unknown	grancalcin, EF-hand calcium binding protein
TRINITY_DN13219_c0_g3	7739.JGI221864	66.7	9.1e-07	ENOG410YKQK	S	Function unknown	grancalcin, EF-hand calcium binding protein
TRINITY_DN13225_c0_g1	6085.XP_002157507	69.5	3.7e-27	COG2032	P	Inorganic ion transport and metabolism	Destroys radicals which are normally produced within the cells and which are toxic to biological systems (By similarity)
TRINITY_DN13225_c0_g2	400682.PAC_15713574	37.9	1.8e-85	ENOG410XRFG	S	Function unknown	Transmembrane protein 57
TRINITY_DN13225_c0_g3	3694.POPTR_0013s03160.1	64.3	1.5e-20	COG2032	P	Inorganic ion transport and metabolism	Destroys radicals which are normally produced within the cells and which are toxic to biological systems (By similarity)
TRINITY_DN13225_c0_g4	7739.JGI243052	74.5	2e-16	COG2032	P	Inorganic ion transport and metabolism	Destroys radicals which are normally produced within the cells and which are toxic to biological systems (By similarity)
TRINITY_DN13228_c0_g1	7739.JGI288113	56.9	6.8e-48	COG0019	E	Amino acid transport and metabolism	Specifically catalyzes the decarboxylation of meso- diaminopimelate (meso-DAP) to L-lysine (By similarity)
TRINITY_DN13229_c0_g1	400682.PAC_15723440	35.6	8.4e-09	NA	NA	NA	NA
TRINITY_DN13230_c0_g16	400682.PAC_15705808	46.7	1.6e-10	ENOG410ZK1Y	S	Function unknown	NA
TRINITY_DN13231_c0_g1	6669.DappuP305817	70.7	3.1e-53	COG1371	S	Function unknown	Chaperone or modulator of proteins involved in DNA or RNA processing (By similarity)
TRINITY_DN13233_c0_g2	10228.TriadP49816	56.2	3.3e-137	ENOG410Z814	S	Function unknown	Tetratricopeptide repeat domain 8
TRINITY_DN13236_c0_g1	7668.SPU_005520tr	61.4	1.4e-22	COG0724	S	Function unknown	Rna-binding protein
TRINITY_DN13236_c0_g2	88036.EFJ31871	36.1	3.3e-11	ENOG41124HH	S	Function unknown	NA
TRINITY_DN13236_c0_g6	400682.PAC_15725967	70	4.5e-125	COG5022	Z	Cytoskeleton	myosin heavy chain
TRINITY_DN13238_c0_g1	400682.PAC_15715393	47.2	1.5e-20	NA	NA	NA	NA
TRINITY_DN13239_c0_g2	641149.HMPREF9016_00482	33	5.1e-31	COG1816	F	Nucleotide transport and metabolism	adenosine deaminase
TRINITY_DN13239_c0_g3	7070.TC005420-PA	38.9	9.3e-06	COG0666	S	Function unknown	Ankyrin Repeat
TRINITY_DN13243_c0_g2	8083.ENSXMAP00000004735	34.7	1.8e-10	ENOG410Z155	S	Function unknown	potassium channel tetramerisation domain containing
TRINITY_DN13246_c0_g1	4533.OB10G22000.1	60	3.5e-07	NA	NA	NA	NA
TRINITY_DN13246_c0_g2	3711.Bra021037.1-P	64.7	1e-32	ENOG411184N	S	Function unknown	NA
TRINITY_DN13247_c0_g1	400682.PAC_15703792	68	1.5e-112	COG0723	C	Energy production and conversion	Component of the ubiquinol-cytochrome c reductase complex (complex III or cytochrome b-c1 complex), which is a respiratory chain that generates an electrochemical potential coupled to ATP synthesis (By similarity)
TRINITY_DN13247_c0_g1	400682.PAC_15703792	68	1.5e-112	COG2857	C	Energy production and conversion	cytochrome c1
TRINITY_DN13248_c0_g2	400682.PAC_15727782	49.1	1.5e-76	COG0094	J	Translation, ribosomal structure and biogenesis	This is 1 of the proteins that binds and probably mediates the attachment of the 5S RNA into the large ribosomal subunit, where it forms part of the central protuberance. In the 70S ribosome it contacts protein S13 of the 30S subunit (bridge B1b), connecting the 2 subunits
TRINITY_DN13249_c2_g9	400682.PAC_15716070	82.4	2.5e-37	COG1997	J	Translation, ribosomal structure and biogenesis	Ribosomal protein
TRINITY_DN13251_c0_g1	45351.NEMVEDRAFT_v1g182082-PA	52.7	2.3e-126	COG0015	F	Nucleotide transport and metabolism	adenylosuccinate lyase
TRINITY_DN13256_c0_g7	400682.PAC_15714601	36	9.7e-07	ENOG4110CDI	S	Function unknown	tigger transposable element derived
TRINITY_DN13258_c0_g1	7070.TC030546-PA	29.5	1.2e-18	ENOG4111G8U	S	Function unknown	deoxyribonuclease II
TRINITY_DN13260_c0_g1	8364.ENSXETP00000044675	90.4	4e-91	COG0639	T	Signal transduction mechanisms	serine threonine-protein phosphatase
TRINITY_DN13261_c0_g1	400682.PAC_15726548	61.8	5.3e-82	COG0596	S	Function unknown	Alpha beta hydrolase
TRINITY_DN13262_c0_g2	400682.PAC_15722249	33.3	5.1e-41	ENOG4111N5R	S	Function unknown	NA
TRINITY_DN13263_c0_g1	400682.PAC_15716888	46.1	5.1e-138	ENOG410XPXF	O	Posttranslational modification, protein turnover, chaperones	leprecan-like
TRINITY_DN13266_c0_g1	400682.PAC_15724453	51.9	1.1e-65	COG1601	J	Translation, ribosomal structure and biogenesis	translation Initiation Factor
TRINITY_DN13268_c1_g2	400682.PAC_15713854	37.9	1.3e-17	ENOG410Z7YX	S	Function unknown	TNF receptor-associated factor
TRINITY_DN13268_c1_g3	400682.PAC_15705420	35.1	2.4e-09	NA	NA	NA	NA
TRINITY_DN13271_c0_g1	400682.PAC_15726320	65.2	4.4e-88	COG1428	F	Nucleotide transport and metabolism	Deoxynucleoside kinase
TRINITY_DN13273_c0_g1	45351.NEMVEDRAFT_v1g242394-PA	47.1	9.5e-79	COG0480	J	Translation, ribosomal structure and biogenesis	Catalyzes the GTP-dependent ribosomal translocation step during translation elongation. During this step, the ribosome changes from the pre-translocational (PRE) to the post- translocational (POST) state as the newly formed A-site-bound peptidyl-tRNA and P-site-bound deacylated tRNA move to the P and E sites, respectively. Catalyzes the coordinated movement of the two tRNA molecules, the mRNA and…
TRINITY_DN13274_c0_g1	8128.ENSONIP00000017753	38.8	1.3e-09	ENOG41121N2	O	Posttranslational modification, protein turnover, chaperones	zinc ion binding
TRINITY_DN13278_c0_g1	400682.PAC_15727985	62.6	1.5e-35	ENOG4111KCU	T	Signal transduction mechanisms	Late endosomal lysosomal adaptor, MAPK and MTOR activator 3
TRINITY_DN13278_c0_g4	397948.Cmaq_0656	35.2	2.4e-11	COG0673	S	Function unknown	oxidoreductase
TRINITY_DN13280_c1_g1	400682.PAC_15707306	34.2	1e-08	NA	NA	NA	NA
TRINITY_DN13282_c0_g2	45351.NEMVEDRAFT_v1g162365-PA	75	1.4e-138	COG1208	M	Cell wall/membrane/envelope biogenesis	nucleotidyl transferase
TRINITY_DN13287_c0_g1	400682.PAC_15712701	94	1.1e-94	COG1100	S	Function unknown	GTP-binding Protein
TRINITY_DN13289_c0_g1	400682.PAC_15702653	56.1	1.6e-08	ENOG410XP6K	S	Function unknown	Notch ligand involved in the mediation of Notch signaling (By similarity)
TRINITY_DN13290_c0_g1	7029.ACYPI000163-PA	61.1	1.9e-24	COG1501	G	Carbohydrate transport and metabolism	hydrolase, family 31
TRINITY_DN13292_c0_g1	7739.JGI78306	30.6	1.1e-26	ENOG410ZTDN	S	Function unknown	NA
TRINITY_DN13296_c0_g3	7176.CPIJ003558-PA	52.6	7.6e-79	COG1413	C	Energy production and conversion	Catalyzes the hydroxylation of the N(6)-(4-aminobutyl)- L-lysine intermediate to form hypusine, an essential post- translational modification only found in mature eIF-5A factor (By similarity)
TRINITY_DN13302_c0_g3	7739.JGI289562	55.7	5.4e-15	ENOG4111IHU	S	Function unknown	Family with sequence similarity 173, member
TRINITY_DN13303_c1_g1	9258.ENSOANP00000030012	75.6	7.5e-133	ENOG4111SVF	T	Signal transduction mechanisms	serine threonine-protein phosphatase
TRINITY_DN13303_c1_g3	400682.PAC_15727761	61.3	2.4e-152	COG0446	S	Function unknown	pyridine nucleotide-disulfide oxidoreductase
TRINITY_DN13307_c0_g1	45351.NEMVEDRAFT_v1g186301-PA	55.6	4e-139	COG1779	S	Function unknown	zinc ion binding
TRINITY_DN13309_c0_g3	400682.PAC_15705808	62.6	8e-28	ENOG410ZK1Y	S	Function unknown	NA
TRINITY_DN13316_c0_g4	45351.NEMVEDRAFT_v1g115803-PA	39.4	2.2e-56	ENOG410XRMJ	T	Signal transduction mechanisms	calcium-dependent protein kinase
TRINITY_DN13316_c0_g6	7897.ENSLACP00000004695	23.3	6.3e-16	ENOG410Z7D9	S	Function unknown	BTB POZ domain containing
TRINITY_DN13316_c0_g8	51511.ENSCSAVP00000000100	46.9	2e-09	ENOG410Z7D9	S	Function unknown	BTB POZ domain containing
TRINITY_DN13319_c0_g1	400682.PAC_15714548	45.8	8.4e-118	ENOG410ZHK4	S	Function unknown	AIG1 family
TRINITY_DN13324_c0_g1	400682.PAC_15711739	55.7	1.2e-75	COG0647	G	Carbohydrate transport and metabolism	Hydrolase
TRINITY_DN13324_c0_g1	400682.PAC_15711739	55.7	1.2e-75	COG5258	S	Function unknown	GTP binding protein
TRINITY_DN13325_c0_g1	400682.PAC_15719693	43.7	3.1e-76	COG3145	L	Replication, recombination and repair	Alkylated DNA repair protein
TRINITY_DN13327_c0_g1	400682.PAC_15706070	37.5	4.5e-46	ENOG4111ZFK	S	Function unknown	NA
TRINITY_DN13328_c0_g2	400682.PAC_15728363	55	9.9e-83	ENOG410Z3FZ	I	Lipid transport and metabolism	fatty acid elongase
TRINITY_DN13330_c3_g3	400682.PAC_15713034	63.1	5.6e-18	ENOG410ZKGV	S	Function unknown	NA
TRINITY_DN13333_c1_g1	400682.PAC_15719834	57.3	1.2e-165	COG4886	S	Function unknown	leucine Rich Repeat
TRINITY_DN13333_c2_g1	400682.PAC_15721808	52.8	6.1e-89	COG5048	S	Function unknown	Zinc finger protein
TRINITY_DN13333_c2_g2	400682.PAC_15719835	59.4	3.7e-91	COG5190	K	Transcription	CTD (Carboxy-terminal domain, RNA polymerase II, polypeptide A)
TRINITY_DN13333_c3_g2	132908.ENSPVAP00000014441	63.3	1.6e-24	ENOG4111G4B	O	Posttranslational modification, protein turnover, chaperones	Ataxin 3
TRINITY_DN13333_c3_g7	400682.PAC_15715787	33.6	3.4e-58	COG0666	S	Function unknown	Ankyrin Repeat
TRINITY_DN13334_c0_g4	45351.NEMVEDRAFT_v1g68890-PA	48.5	3.1e-14	ENOG410XWCC	S	Function unknown	NA
TRINITY_DN13336_c0_g1	9796.ENSECAP00000013040	50.7	1.2e-35	COG5052	U	Intracellular trafficking, secretion, and vesicular transport	receptor accessory protein
TRINITY_DN13337_c0_g1	45351.NEMVEDRAFT_v1g118883-PA	47.8	8.2e-41	ENOG4111FUV	J	Translation, ribosomal structure and biogenesis	processing of precursor 4, ribonuclease P MRP subunit (S. cerevisiae)
TRINITY_DN13337_c0_g2	400682.PAC_15724410	35	1.9e-54	COG0515	T	Signal transduction mechanisms	Serine Threonine protein kinase
TRINITY_DN13338_c0_g1	765952.PUV_11120	48.3	4.9e-142	ENOG410XP67	I	Lipid transport and metabolism	)-reductase
TRINITY_DN13339_c0_g1	400682.PAC_15719742	41.7	7.5e-11	ENOG410Y1E5	S	Function unknown	Usher syndrome 2A (autosomal recessive, mild)
TRINITY_DN13340_c1_g2	6085.XP_002167973	41.4	1e-21	COG2801	L	Replication, recombination and repair	Retrotransposon protein
TRINITY_DN13341_c0_g6	400682.PAC_15720026	49.1	9.1e-07	ENOG410XP79	S	Function unknown	glucuronosyltransferase
TRINITY_DN13346_c2_g2	7739.JGI93148	61.8	7.9e-09	NA	NA	NA	NA
TRINITY_DN13347_c0_g1	7739.JGI252152	63.8	1.2e-52	COG1024	I	Lipid transport and metabolism	Enoyl-CoA hydratase
TRINITY_DN13347_c0_g2	400682.PAC_15723596	29	2.3e-10	ENOG4111W8D	S	Function unknown	Gametocyte specific factor
TRINITY_DN13348_c0_g1	400682.PAC_15722601	29.2	6e-42	ENOG410XQ9T	T	Signal transduction mechanisms	SCY1-like 2 (S. cerevisiae)
TRINITY_DN13350_c0_g1	400682.PAC_15704715	44.4	1.7e-47	COG5640	O	Posttranslational modification, protein turnover, chaperones	protease
TRINITY_DN13351_c0_g2	4113.PGSC0003DMT400094705	73.8	6.8e-60	ENOG410Y1GU	S	Function unknown	NA
TRINITY_DN13354_c0_g1	8128.ENSONIP00000024699	34.4	6.9e-17	COG1881	S	Function unknown	phosphatidylethanolamine-binding protein
TRINITY_DN13354_c0_g2	7029.ACYPI004701-PA	37.8	9.4e-12	ENOG4111JAT	U	Intracellular trafficking, secretion, and vesicular transport	Microtubule-associated protein 1 light chain 3
TRINITY_DN13354_c0_g6	6945.ISCW019974-PA	77.3	2.4e-153	COG0516	F	Nucleotide transport and metabolism	Catalyzes the conversion of inosine 5'-phosphate (IMP) to xanthosine 5'-phosphate (XMP), the first committed and rate- limiting step in the de novo synthesis of guanine nucleotides, and therefore plays an important role in the regulation of cell growth (By similarity)
TRINITY_DN13354_c0_g7	400682.PAC_15719262	51.2	2.9e-78	ENOG410XV5H	S	Function unknown	Beta-1,3-galactosyltransferase
TRINITY_DN13358_c0_g1	400682.PAC_15720534	45.7	1.7e-58	ENOG410XQ5G	K	Transcription	RING finger) protein
TRINITY_DN13360_c0_g1	45351.NEMVEDRAFT_v1g241710-PA	49.9	5.3e-121	ENOG410ZGSX	S	Function unknown	WD repeat domain 34
TRINITY_DN13361_c0_g1	3711.Bra040146.1-P	93.8	1.1e-65	COG0057	G	Carbohydrate transport and metabolism	glyceraldehyde3phosphate dehydrogenase
TRINITY_DN13361_c0_g3	3847.GLYMA04G36860.1	94.2	7.6e-31	COG0057	G	Carbohydrate transport and metabolism	glyceraldehyde3phosphate dehydrogenase
TRINITY_DN13362_c0_g1	45351.NEMVEDRAFT_v1g159188-PA	47.3	1.8e-17	COG1057	H	Coenzyme transport and metabolism	Catalyzes the reversible adenylation of nicotinate mononucleotide (NaMN) to nicotinic acid adenine dinucleotide (NaAD) (By similarity)
TRINITY_DN13363_c0_g1	45351.NEMVEDRAFT_v1g235866-PA	42.7	2.3e-43	COG5223	S	Function unknown	U3 small nucleolar RNA-associated protein
TRINITY_DN13364_c0_g1	7159.AAEL003840-PA	37.4	3.7e-07	ENOG4111EA0	S	Function unknown	Lectin, galactoside-binding, soluble
TRINITY_DN13365_c0_g2	400682.PAC_15721706	60.2	9.8e-154	ENOG410XS7H	I	Lipid transport and metabolism	Phosphatidylserine synthase
TRINITY_DN13366_c0_g1	400682.PAC_15725071	60.2	2.8e-29	COG1100	S	Function unknown	GTP-binding Protein
TRINITY_DN13369_c1_g1	7739.JGI67608	51.1	1.3e-98	COG0466	O	Posttranslational modification, protein turnover, chaperones	ATP-dependent serine protease that mediates the selective degradation of mutant and abnormal proteins as well as certain short-lived regulatory proteins. Required for cellular homeostasis and for survival from DNA damage and developmental changes induced by stress. Degrades polypeptides processively to yield small peptide fragments that are 5 to 10 amino acids long. Binds to DNA in a double-stran…
TRINITY_DN13369_c1_g5	400682.PAC_15721513	67.6	6.3e-65	COG0225	O	Posttranslational modification, protein turnover, chaperones	Has an important function as a repair enzyme for proteins that have been inactivated by oxidation. Catalyzes the reversible oxidation-reduction of methionine sulfoxide in proteins to methionine (By similarity)
TRINITY_DN13369_c1_g6	45351.NEMVEDRAFT_v1g103779-PA	79.7	2.1e-23	COG2260	J	Translation, ribosomal structure and biogenesis	rRNA processing
TRINITY_DN13371_c0_g1	43179.ENSSTOP00000004259	57.8	3.8e-31	ENOG4111JYD	S	Function unknown	kiaa0907
TRINITY_DN13375_c0_g1	400682.PAC_15723174	51.2	1.2e-28	COG0557	K	Transcription	3'-5' exoribonuclease that releases 5'-nucleoside monophosphates and is involved in maturation of structured RNAs (By similarity)
TRINITY_DN13375_c0_g4	9913.ENSBTAP00000037928	47.2	1.2e-122	COG0557	K	Transcription	3'-5' exoribonuclease that releases 5'-nucleoside monophosphates and is involved in maturation of structured RNAs (By similarity)
TRINITY_DN13376_c0_g2	400682.PAC_15722765	42.3	1.8e-89	ENOG410XPM7	S	Function unknown	coiled-coil and C2 domain containing
TRINITY_DN13377_c0_g3	400682.PAC_15723441	57.8	6.9e-206	COG1874	G	Carbohydrate transport and metabolism	beta-galactosidase
TRINITY_DN13378_c0_g2	5180.EDN96938	46	4.3e-08	ENOG41121N2	O	Posttranslational modification, protein turnover, chaperones	zinc ion binding
TRINITY_DN13378_c0_g3	400682.PAC_15722581	31.5	1.7e-27	NA	NA	NA	NA
TRINITY_DN13379_c0_g2	7739.JGI122455	53.3	1.3e-36	COG0560	E	Amino acid transport and metabolism	phosphoserine phosphatase activity
TRINITY_DN13380_c0_g2	7668.SPU_024996tr	34.2	3.3e-78	ENOG410XXHF	S	Function unknown	ring finger and CHY zinc finger
TRINITY_DN13380_c0_g3	400682.PAC_15722404	53.2	6.3e-33	COG2124	Q	Secondary metabolites biosynthesis, transport and catabolism	Cytochrome p450
TRINITY_DN13381_c0_g1	400682.PAC_15706698	53.3	2.6e-163	COG2801	L	Replication, recombination and repair	Retrotransposon protein
TRINITY_DN13382_c0_g1	400682.PAC_15719703	42.1	3.2e-72	ENOG410ZZW5	O	Posttranslational modification, protein turnover, chaperones	Ras and Rab interactor
TRINITY_DN13382_c0_g2	400682.PAC_15719703	45.3	8.8e-33	ENOG410ZZW5	O	Posttranslational modification, protein turnover, chaperones	Ras and Rab interactor
TRINITY_DN13389_c0_g1	7739.JGI105741	25.3	7.6e-22	ENOG410ZQIE	O	Posttranslational modification, protein turnover, chaperones	apoptosis-related cysteine peptidase
TRINITY_DN13392_c0_g1	400682.PAC_15707820	59.4	1e-220	COG1643	L	Replication, recombination and repair	helicase
TRINITY_DN13394_c0_g1	400682.PAC_15723098	51.7	1.1e-37	ENOG410Y9N9	K	Transcription	Breast cancer metastasis-suppressor
TRINITY_DN13394_c0_g2	7739.JGI90260	82.2	3.4e-38	ENOG4111URU	S	Function unknown	Barrier to autointegration factor
TRINITY_DN13395_c0_g1	400682.PAC_15724305	32.6	2.6e-26	ENOG410XNMM	S	Function unknown	collagen, type
TRINITY_DN13397_c0_g1	420662.Mpe_A1506	79.3	3.4e-40	ENOG4111IF2	S	Function unknown	phasin family
TRINITY_DN13398_c0_g1	400682.PAC_15725153	34.7	4.2e-63	ENOG410Z4HD	S	Function unknown	family with sequence similarity 154, member
TRINITY_DN13400_c0_g3	6085.XP_002170386	48.5	1.5e-14	COG0461	F	Nucleotide transport and metabolism	orotate phosphoribosyltransferase activity
TRINITY_DN13401_c0_g5	400682.PAC_15725919	39.7	6.8e-43	ENOG410XPV4	U	Intracellular trafficking, secretion, and vesicular transport	nuclear pore complex protein
TRINITY_DN13402_c0_g1	6945.ISCW021640-PA	23.2	1.6e-17	ENOG410XPE6	S	Function unknown	CAS1 domain containing 1
TRINITY_DN13403_c0_g1	400682.PAC_15728550	44.9	2.4e-49	ENOG410XS2S	U	Intracellular trafficking, secretion, and vesicular transport	docking protein
TRINITY_DN13405_c0_g1	400682.PAC_15723109	69	7.1e-128	ENOG410XTHA	S	Function unknown	mannosyloligosaccharide glucosidase
TRINITY_DN13405_c0_g3	7159.AAEL000042-PA	39.1	6.4e-12	COG2214	O	Posttranslational modification, protein turnover, chaperones	DNAj domain protein
TRINITY_DN13406_c0_g1	6183.Smp_078800__mRNA	47.9	1.4e-21	COG2214	O	Posttranslational modification, protein turnover, chaperones	DNAj domain protein
TRINITY_DN13413_c0_g1	400682.PAC_15709018	35.7	1.5e-32	ENOG410Z5DF	O	Posttranslational modification, protein turnover, chaperones	Ring finger protein
TRINITY_DN13414_c0_g1	400682.PAC_15715901	33.7	2.6e-15	NA	NA	NA	NA
TRINITY_DN13415_c0_g1	45351.NEMVEDRAFT_v1g94346-PA	48.3	1.1e-32	COG0712	C	Energy production and conversion	F(1)F(0) ATP synthase produces ATP from ADP in the presence of a proton or sodium gradient. F-type ATPases consist of two structural domains, F(1) containing the extramembraneous catalytic core and F(0) containing the membrane proton channel, linked together by a central stalk and a peripheral stalk. During catalysis, ATP synthesis in the catalytic domain of F(1) is coupled via a rotary mechanism…
TRINITY_DN13416_c0_g1	13616.ENSMODP00000001321	54.8	2.3e-248	COG3440	V	Defense mechanisms	ubiquitin-like with PHD and ring finger domains 2, E3 ubiquitin protein ligase
TRINITY_DN13418_c0_g2	400682.PAC_15723924	57	2e-78	ENOG410Z0E9	S	Function unknown	family with sequence similarity 45, member A
TRINITY_DN13425_c2_g11	3847.GLYMA13G12220.1	98.8	2.4e-39	ENOG410XZB8	S	Function unknown	NA
TRINITY_DN13425_c2_g3	4081.Solyc01g007590.2.1	89.9	1.6e-32	COG0093	J	Translation, ribosomal structure and biogenesis	Binds to 23S rRNA. Forms part of two intersubunit bridges in the 70S ribosome (By similarity)
TRINITY_DN13425_c2_g4	6183.Smp_184280__mRNA	58.3	5.9e-09	ENOG410XZB8	S	Function unknown	NA
TRINITY_DN13425_c2_g6	441959.XP_002484510.1	87.3	1.8e-51	ENOG410XZB8	S	Function unknown	NA
TRINITY_DN13425_c2_g7	36630.CADNFIAP00005410	69.2	3.6e-08	ENOG410XVWA	S	Function unknown	NA
TRINITY_DN13426_c1_g1	45351.NEMVEDRAFT_v1g173044-PA	37.9	1.2e-27	COG5117	J	Translation, ribosomal structure and biogenesis	nucleolar complex associated 3 homolog (S. cerevisiae)
TRINITY_DN13426_c1_g1	45351.NEMVEDRAFT_v1g173044-PA	37.9	1.2e-27	COG5117	U	Intracellular trafficking, secretion, and vesicular transport	nucleolar complex associated 3 homolog (S. cerevisiae)
TRINITY_DN13426_c1_g2	45351.NEMVEDRAFT_v1g173044-PA	48.7	7.1e-16	COG5117	J	Translation, ribosomal structure and biogenesis	nucleolar complex associated 3 homolog (S. cerevisiae)
TRINITY_DN13426_c1_g2	45351.NEMVEDRAFT_v1g173044-PA	48.7	7.1e-16	COG5117	U	Intracellular trafficking, secretion, and vesicular transport	nucleolar complex associated 3 homolog (S. cerevisiae)
TRINITY_DN13427_c0_g1	8128.ENSONIP00000021508	72.8	1.2e-33	COG1308	K	Transcription	nascent polypeptide-associated complex
TRINITY_DN13428_c0_g1	400682.PAC_15728560	70.1	1.4e-189	COG0465	O	Posttranslational modification, protein turnover, chaperones	Acts as a processive, ATP-dependent zinc metallopeptidase for both cytoplasmic and membrane proteins. Plays a role in the quality control of integral membrane proteins (By similarity)
TRINITY_DN13429_c0_g2	400682.PAC_15709366	48.8	1e-28	COG4870	O	Posttranslational modification, protein turnover, chaperones	cathepsin
TRINITY_DN13432_c0_g5	400682.PAC_15726593	35	3.3e-37	COG3338	P	Inorganic ion transport and metabolism	Carbonic anhydrase
TRINITY_DN13433_c2_g3	400682.PAC_15727225	25.6	1.9e-38	ENOG410YU9R	S	Function unknown	NA
TRINITY_DN13434_c0_g1	7739.JGI220041	43.7	7.5e-10	ENOG410XQBY	S	Function unknown	SH3-domain kinase binding protein 1
TRINITY_DN13435_c0_g17	400682.PAC_15723843	61.8	9.6e-11	NA	NA	NA	NA
TRINITY_DN13435_c0_g9	400682.PAC_15704675	59.4	1.8e-14	COG2801	L	Replication, recombination and repair	Retrotransposon protein
TRINITY_DN13436_c2_g1	400682.PAC_15718127	39.8	1.2e-33	ENOG410YZ5M	S	Function unknown	outer dense fiber of sperm tails
TRINITY_DN13438_c1_g7	400682.PAC_15701755	51.3	5.3e-35	ENOG4111QA2	K	Transcription	Component of the Mediator complex, a coactivator involved in the regulated transcription of nearly all RNA polymerase II-dependent genes. Mediator functions as a bridge to convey information from gene-specific regulatory proteins to the basal RNA polymerase II transcription machinery. Mediator is recruited to promoters by direct interactions with regulatory proteins and serves as a scaffold for t…
TRINITY_DN13439_c0_g1	400682.PAC_15703717	46.8	2.5e-20	ENOG4111QGV	S	Function unknown	NA
TRINITY_DN13439_c0_g3	400682.PAC_15713491	73.9	2.9e-146	COG5019	D	Cell cycle control, cell division, chromosome partitioning	Cell division control protein
TRINITY_DN13439_c0_g3	400682.PAC_15713491	73.9	2.9e-146	COG5019	Z	Cytoskeleton	Cell division control protein
TRINITY_DN13439_c0_g4	7739.JGI141545	76.6	6.2e-30	COG5347	U	Intracellular trafficking, secretion, and vesicular transport	domain, ankyrin repeat and PH domain
TRINITY_DN13440_c0_g1	400682.PAC_15714337	56.1	9e-06	NA	NA	NA	NA
TRINITY_DN13441_c0_g1	69293.ENSGACP00000016178	27.1	2e-10	ENOG410XT0E	S	Function unknown	thyroid hormone receptor interactor 11
TRINITY_DN13443_c0_g1	10090.ENSMUSP00000112787	100	4.1e-99	ENOG411154J	O	Posttranslational modification, protein turnover, chaperones	major urinary protein
TRINITY_DN13444_c2_g1	400682.PAC_15727065	46	6e-132	ENOG410XT8W	S	Function unknown	5-nucleotidase domain containing
TRINITY_DN13445_c2_g1	400682.PAC_15718713	33.2	2.3e-37	NA	NA	NA	NA
TRINITY_DN13447_c0_g1	400682.PAC_15710790	30.1	9.5e-16	NA	NA	NA	NA
TRINITY_DN13447_c0_g2	400682.PAC_15707108	25.1	4.2e-07	NA	NA	NA	NA
TRINITY_DN13449_c0_g3	7668.SPU_001409tr	51.4	4.7e-18	NA	NA	NA	NA
TRINITY_DN13449_c0_g8	400682.PAC_15706988	42.7	2.3e-19	NA	NA	NA	NA
TRINITY_DN13450_c0_g1	7757.ENSPMAP00000000343	34.8	9.4e-56	COG2183	K	Transcription	domain protein
TRINITY_DN13451_c3_g1	28377.ENSACAP00000001074	79.4	2.2e-41	ENOG410XP9G	T	Signal transduction mechanisms	mitogen-activated protein kinase kinase kinase kinase
TRINITY_DN13451_c3_g5	7425.NV11454-PA	65.5	2.2e-36	ENOG410XP9G	T	Signal transduction mechanisms	mitogen-activated protein kinase kinase kinase kinase
TRINITY_DN13452_c0_g1	400682.PAC_15720043	52.8	1.5e-31	ENOG41102R9	S	Function unknown	NA
TRINITY_DN13452_c0_g4	400682.PAC_15728850	51.6	1.3e-37	COG0676	G	Carbohydrate transport and metabolism	Aldose 1epimerase
TRINITY_DN13452_c0_g5	400682.PAC_15716687	54.6	6.7e-51	ENOG4111HAI	O	Posttranslational modification, protein turnover, chaperones	Glutaredoxin
TRINITY_DN13452_c0_g9	400682.PAC_15728850	58.6	9.3e-31	COG0676	G	Carbohydrate transport and metabolism	Aldose 1epimerase
TRINITY_DN13452_c1_g1	400682.PAC_15713901	64.5	4.2e-178	COG0415	L	Replication, recombination and repair	deoxyribo-dipyrimidine photolyase
TRINITY_DN13452_c1_g3	7668.SPU_000865tr	74.5	5.8e-109	COG5032	B	Chromatin structure and dynamics	phosphatidylinositol kinase activity
TRINITY_DN13452_c1_g3	7668.SPU_000865tr	74.5	5.8e-109	COG5032	D	Cell cycle control, cell division, chromosome partitioning	phosphatidylinositol kinase activity
TRINITY_DN13452_c1_g3	7668.SPU_000865tr	74.5	5.8e-109	COG5032	L	Replication, recombination and repair	phosphatidylinositol kinase activity
TRINITY_DN13452_c1_g3	7668.SPU_000865tr	74.5	5.8e-109	COG5032	T	Signal transduction mechanisms	phosphatidylinositol kinase activity
TRINITY_DN13452_c1_g3	7668.SPU_000865tr	74.5	5.8e-109	COG5032	U	Intracellular trafficking, secretion, and vesicular transport	phosphatidylinositol kinase activity
TRINITY_DN13453_c0_g17	400682.PAC_15708125	59.2	4.3e-37	COG2801	L	Replication, recombination and repair	Retrotransposon protein
TRINITY_DN13453_c0_g6	400682.PAC_15719913	48.3	2.6e-61	ENOG410YF8M	S	Function unknown	reductase
TRINITY_DN13454_c0_g1	12957.ACEP_00009487-PA	85.8	5.7e-51	COG5023	Z	Cytoskeleton	protein polymerization
TRINITY_DN13454_c2_g1	7739.JGI62439	98.4	9.5e-249	COG5023	Z	Cytoskeleton	protein polymerization
TRINITY_DN13454_c2_g2	9796.ENSECAP00000012115	93.8	7.5e-11	COG5023	Z	Cytoskeleton	protein polymerization
TRINITY_DN13455_c0_g1	400682.PAC_15723911	65.7	2.7e-234	COG1057	H	Coenzyme transport and metabolism	Catalyzes the reversible adenylation of nicotinate mononucleotide (NaMN) to nicotinic acid adenine dinucleotide (NaAD) (By similarity)
TRINITY_DN13455_c0_g1	400682.PAC_15723911	65.7	2.7e-234	COG1084	S	Function unknown	Involved in the biogenesis of the 60S ribosomal subunit (By similarity)
TRINITY_DN13459_c0_g1	400682.PAC_15713854	42.8	1.6e-32	ENOG410Z7YX	S	Function unknown	TNF receptor-associated factor
TRINITY_DN13459_c0_g4	400682.PAC_15718941	31.5	2e-16	ENOG410Z7YX	S	Function unknown	TNF receptor-associated factor
TRINITY_DN13463_c0_g2	400682.PAC_15723941	38.6	2.7e-102	ENOG410Y3W5	U	Intracellular trafficking, secretion, and vesicular transport	Functions as a sorting receptor in the Golgi compartment required for the intracellular sorting and delivery of soluble vacuolar proteins, like carboxypeptidase Y (CPY) and proteinase A. Executes multiple rounds of sorting by cycling between the late Golgi and a prevacuolar endosome-like compartment
TRINITY_DN13467_c0_g1	7955.ENSDARP00000019859	57.3	1.4e-65	ENOG410XQCY	S	Function unknown	)-reductase
TRINITY_DN13471_c0_g5	28377.ENSACAP00000001137	65.5	1.8e-113	ENOG410XPEV	S	Function unknown	cleft lip and palate
TRINITY_DN13471_c1_g1	400682.PAC_15727759	46.2	7e-57	COG5058	U	Intracellular trafficking, secretion, and vesicular transport	ceramide synthase
TRINITY_DN13472_c0_g1	400682.PAC_15722226	36.9	1.6e-72	ENOG410XSX3	S	Function unknown	trafficking protein particle complex
TRINITY_DN13472_c1_g1	400682.PAC_15716624	52.7	1.6e-47	COG0454	K	Transcription	acetyltransferase
TRINITY_DN13473_c1_g1	653948.CCA21120	42.2	8.8e-07	ENOG410XSIH	O	Posttranslational modification, protein turnover, chaperones	ubiquitin carboxyl-terminal hydrolase
TRINITY_DN13474_c0_g1	400682.PAC_15721364	67.9	2e-55	COG5126	D	Cell cycle control, cell division, chromosome partitioning	Calcium-binding protein
TRINITY_DN13474_c0_g1	400682.PAC_15721364	67.9	2e-55	COG5126	T	Signal transduction mechanisms	Calcium-binding protein
TRINITY_DN13474_c0_g1	400682.PAC_15721364	67.9	2e-55	COG5126	Z	Cytoskeleton	Calcium-binding protein
TRINITY_DN13475_c0_g3	7739.JGI278061	51.5	5.5e-136	COG5258	S	Function unknown	GTP binding protein
TRINITY_DN13476_c0_g10	400682.PAC_15702057	53	4.4e-10	ENOG410ZP0B	S	Function unknown	NA
TRINITY_DN13476_c0_g2	400682.PAC_15715416	60.4	1.4e-08	ENOG410YR2E	S	Function unknown	tectorin alpha
TRINITY_DN13480_c3_g1	400682.PAC_15702358	69.6	8.4e-19	COG2801	L	Replication, recombination and repair	Retrotransposon protein
TRINITY_DN13480_c3_g3	400682.PAC_15700899	73.3	5.6e-31	COG2801	L	Replication, recombination and repair	Retrotransposon protein
TRINITY_DN13481_c0_g1	31033.ENSTRUP00000037562	33.1	4.3e-13	ENOG410XS5D	S	Function unknown	Unc-13 homolog
TRINITY_DN13483_c1_g3	411460.RUMTOR_02851	30.4	5.5e-10	ENOG410XUN0	S	Function unknown	NA
TRINITY_DN13485_c1_g3	613026.HRAG_00459	63.5	1.3e-10	NA	NA	NA	NA
TRINITY_DN13486_c0_g1	400682.PAC_15726075	63.8	4.4e-79	COG5597	O	Posttranslational modification, protein turnover, chaperones	Glycosyl Transferase
TRINITY_DN13487_c0_g1	7739.JGI199194	29.8	7.7e-23	ENOG41102NY	S	Function unknown	Arrestin domain containing
TRINITY_DN13488_c0_g1	400682.PAC_15712318	38.6	2.7e-75	COG0639	T	Signal transduction mechanisms	serine threonine-protein phosphatase
TRINITY_DN13489_c3_g1	7668.SPU_026411tr	60.8	1e-225	ENOG410XQB4	O	Posttranslational modification, protein turnover, chaperones	peptidylprolyl isomerase domain and WD
TRINITY_DN13489_c4_g3	400682.PAC_15723721	76.7	7.5e-130	COG5406	K	Transcription	Component of the FACT complex, a general chromatin factor that acts to reorganize nucleosomes. The FACT complex is involved in multiple processes that require DNA as a template such as mRNA elongation, DNA replication and DNA repair. During transcription elongation the FACT complex acts as a histone chaperone that both destabilizes and restores nucleosomal structure. It facilitates the passage of…
TRINITY_DN13489_c4_g4	400682.PAC_15723721	61.6	4.5e-226	COG5406	K	Transcription	Component of the FACT complex, a general chromatin factor that acts to reorganize nucleosomes. The FACT complex is involved in multiple processes that require DNA as a template such as mRNA elongation, DNA replication and DNA repair. During transcription elongation the FACT complex acts as a histone chaperone that both destabilizes and restores nucleosomal structure. It facilitates the passage of…
TRINITY_DN13491_c2_g2	400682.PAC_15706771	52.9	5.8e-22	ENOG410XQ1Y	S	Function unknown	zinc finger
TRINITY_DN13492_c0_g1	400682.PAC_15721574	50.5	3.5e-90	COG1409	S	Function unknown	Hydrolyzes cAMP to 5'-AMP. Plays an important regulatory role in modulating the intracellular concentration of cAMP, thereby influencing cAMP-dependent processes (By similarity)
TRINITY_DN13492_c0_g2	400682.PAC_15721575	56.2	2.5e-98	ENOG41102A3	S	Function unknown	Acid phosphatase
TRINITY_DN13492_c0_g4	400682.PAC_15721575	53.1	2.1e-46	ENOG41102A3	S	Function unknown	Acid phosphatase
TRINITY_DN13492_c0_g5	400682.PAC_15728555	58.1	3.1e-97	COG0005	F	Nucleotide transport and metabolism	The purine nucleoside phosphorylases catalyze the phosphorolytic breakdown of the N-glycosidic bond in the beta- (deoxy)ribonucleoside molecules, with the formation of the corresponding free purine bases and pentose-1-phosphate (By similarity)
TRINITY_DN13494_c0_g1	400682.PAC_15716892	57.2	1.8e-129	COG5277	Z	Cytoskeleton	Actin-related protein
TRINITY_DN13495_c0_g1	30608.ENSMICP00000012148	53	8.8e-170	ENOG410YWWI	U	Intracellular trafficking, secretion, and vesicular transport	cyclic nucleotide gated channel alpha
TRINITY_DN13496_c0_g7	400682.PAC_15707512	50.8	1.4e-07	ENOG4111JB0	S	Function unknown	NA
TRINITY_DN13499_c0_g1	162425.CADANIAP00003248	43.9	7.6e-09	ENOG410Y2ES	S	Function unknown	NA
TRINITY_DN13499_c0_g3	425265.XP_001728955.1	100	2.6e-20	ENOG410Y2ES	S	Function unknown	NA
TRINITY_DN13502_c0_g1	400682.PAC_15715985	74.4	2.3e-90	COG0012	J	Translation, ribosomal structure and biogenesis	gtp-binding protein
TRINITY_DN13503_c1_g14	6945.ISCW009788-PA	52.1	6.2e-62	COG2967	P	Inorganic ion transport and metabolism	ApaG protein
TRINITY_DN13503_c1_g3	7955.ENSDARP00000118245	36.8	2.2e-17	ENOG410XRT4	S	Function unknown	Metastasis suppressor
TRINITY_DN13504_c0_g1	400682.PAC_15725991	65.2	3.2e-08	ENOG410ZIH7	S	Function unknown	Cofilin/tropomyosin-type actin-binding protein
TRINITY_DN13508_c0_g1	7739.JGI225672	43.3	3.1e-22	ENOG410ZKKR	K	Transcription	Purine-rich element binding protein
TRINITY_DN13508_c0_g2	400682.PAC_15720553	59.2	1.2e-106	COG4284	G	Carbohydrate transport and metabolism	pyrophosphorylase
TRINITY_DN13510_c0_g2	8364.ENSXETP00000047995	51.7	1.4e-49	ENOG410YA15	S	Function unknown	chromosome 11 open reading frame 70
TRINITY_DN13512_c1_g1	400682.PAC_15716305	47.1	6.6e-32	ENOG410XP20	S	Function unknown	RNA binding motif protein
TRINITY_DN13512_c1_g3	7227.FBpp0078333	55.4	1.4e-40	ENOG410ZSH4	S	Function unknown	RNA splicing
TRINITY_DN13512_c1_g7	400682.PAC_15707730	39.2	3.4e-13	NA	NA	NA	NA
TRINITY_DN13512_c1_g8	400682.PAC_15716305	32.2	6.3e-29	ENOG410XP20	S	Function unknown	RNA binding motif protein
TRINITY_DN13513_c0_g1	400682.PAC_15723647	35.7	1.1e-69	ENOG410XSTK	U	Intracellular trafficking, secretion, and vesicular transport	Feline leukemia virus subgroup C cellular receptor
TRINITY_DN13514_c1_g1	575615.HMPREF0670_02906	51.4	9.9e-10	ENOG41129MV	S	Function unknown	NA
TRINITY_DN13517_c0_g1	400682.PAC_15727090	34.5	5.8e-53	ENOG410ZV5F	S	Function unknown	NA
TRINITY_DN13518_c0_g1	400682.PAC_15710569	67.2	1.4e-93	COG5056	I	Lipid transport and metabolism	Oacyltransferase
TRINITY_DN13519_c0_g3	400682.PAC_15709530	50.7	2.1e-13	ENOG4111NX8	S	Function unknown	NA
TRINITY_DN13520_c1_g7	400682.PAC_15720818	55.1	3.9e-45	ENOG4111JYC	S	Function unknown	COMM domain containing 8
TRINITY_DN13521_c0_g1	3711.Bra014785.1-P	38.1	2.3e-18	ENOG410YCCP	S	Function unknown	member RAS oncogene family
TRINITY_DN13523_c0_g1	10090.ENSMUSP00000093101	98.7	1.1e-79	COG4826	O	Posttranslational modification, protein turnover, chaperones	serine-type endopeptidase inhibitor activity
TRINITY_DN13523_c0_g2	10090.ENSMUSP00000073695	99.3	3.6e-72	COG4826	O	Posttranslational modification, protein turnover, chaperones	serine-type endopeptidase inhibitor activity
TRINITY_DN13526_c0_g1	45351.NEMVEDRAFT_v1g26599-PA	61.1	2.9e-37	COG5347	U	Intracellular trafficking, secretion, and vesicular transport	domain, ankyrin repeat and PH domain
TRINITY_DN13528_c0_g1	400682.PAC_15724386	41.2	6.9e-86	COG5184	D	Cell cycle control, cell division, chromosome partitioning	regulator of chromosome condensation
TRINITY_DN13528_c0_g1	400682.PAC_15724386	41.2	6.9e-86	COG5184	Z	Cytoskeleton	regulator of chromosome condensation
TRINITY_DN13529_c0_g3	10116.ENSRNOP00000064508	80.4	2.1e-29	ENOG410XZB8	S	Function unknown	NA
TRINITY_DN13533_c0_g1	314225.ELI_05750	32.1	7.2e-41	ENOG4111FI2	S	Function unknown	Protein of unknown function (DUF1679)
TRINITY_DN13537_c0_g1	400682.PAC_15718232	36.1	1.3e-60	ENOG410XR2J	S	Function unknown	PP2Cc
TRINITY_DN13538_c0_g5	28377.ENSACAP00000012935	37.9	3.8e-22	ENOG410XSN6	S	Function unknown	TELO2 interacting protein 1
TRINITY_DN13540_c2_g6	400682.PAC_15717551	64.8	1.5e-34	COG5143	U	Intracellular trafficking, secretion, and vesicular transport	Vesicle-associated membrane protein
TRINITY_DN13540_c3_g1	400682.PAC_15727077	42.6	6.9e-228	COG5537	D	Cell cycle control, cell division, chromosome partitioning	Stromal antigen
TRINITY_DN13542_c0_g2	400682.PAC_15718728	60.5	2.7e-36	ENOG4111EGZ	S	Function unknown	armadillo repeat-containing protein 1
TRINITY_DN13544_c0_g1	10090.ENSMUSP00000001402	49.7	6e-45	ENOG410XPVI	S	Function unknown	F-box protein
TRINITY_DN13545_c1_g2	7897.ENSLACP00000014965	54.5	6.3e-10	ENOG4111ZFK	S	Function unknown	NA
TRINITY_DN13549_c1_g1	32049.SYNPCC7002_A1083	42.6	2.1e-32	ENOG4112CP2	S	Function unknown	LCCL domain protein
TRINITY_DN13550_c1_g5	8083.ENSXMAP00000011006	57.3	4.9e-162	COG0369	P	Inorganic ion transport and metabolism	Component of the sulfite reductase complex that catalyzes the 6-electron reduction of sulfite to sulfide. This is one of several activities required for the biosynthesis of L- cysteine from sulfate. The flavoprotein component catalyzes the electron flow from NADPH - FAD - FMN to the hemoprotein component (By similarity)
TRINITY_DN13555_c0_g5	400682.PAC_15722386	40.7	1.9e-42	COG2761	Q	Secondary metabolites biosynthesis, transport and catabolism	DSBA oxidoreductase
TRINITY_DN13557_c0_g1	45351.NEMVEDRAFT_v1g241460-PA	64.8	1.4e-171	COG0179	Q	Secondary metabolites biosynthesis, transport and catabolism	Fumarylacetoacetate hydrolase
TRINITY_DN13559_c0_g1	400682.PAC_15707624	57.1	1.2e-49	ENOG4111SYH	S	Function unknown	Peroxisomal membrane protein
TRINITY_DN13560_c0_g1	400682.PAC_15725071	38.1	6.2e-15	COG1100	S	Function unknown	GTP-binding Protein
TRINITY_DN13561_c1_g1	400682.PAC_15714457	46.5	1.2e-13	COG2110	S	Function unknown	appr-1-p processing domain protein
TRINITY_DN13561_c1_g2	7739.JGI122801	35	6.1e-70	ENOG410XSNC	S	Function unknown	amine oxidase
TRINITY_DN13561_c1_g6	400682.PAC_15707524	35.3	2.4e-120	COG2110	S	Function unknown	appr-1-p processing domain protein
TRINITY_DN13561_c1_g7	7739.JGI238940	54.7	7.1e-150	COG2041	S	Function unknown	The exact function is not known. Can catalyze the reduction of a variety of substrates like dimethyl sulfoxide, trimethylamine N-oxide, phenylmethyl sulfoxide and L-methionine sulfoxide. Cannot reduce cyclic N-oxides. Shows no activity as sulfite oxidase (By similarity)
TRINITY_DN13561_c2_g1	400682.PAC_15716908	76.8	0	COG1241	L	Replication, recombination and repair	dna replication licensing factor
TRINITY_DN13564_c0_g2	7425.NV18118-PA	33	6.6e-06	ENOG4112791	S	Function unknown	Ornithine decarboxylase antizyme
TRINITY_DN13565_c2_g2	400682.PAC_15714153	34.5	8e-14	NA	NA	NA	NA
TRINITY_DN13565_c2_g3	7897.ENSLACP00000011565	50.7	8.8e-75	COG1091	M	Cell wall/membrane/envelope biogenesis	Dtdp-4-dehydrorhamnose reductase
TRINITY_DN13567_c3_g2	45351.NEMVEDRAFT_v1g171453-PA	54.6	7.6e-110	COG2355	E	Amino acid transport and metabolism	Dipeptidase
TRINITY_DN13569_c0_g1	7739.JGI126923	56.1	3.3e-49	ENOG410ZEWV	S	Function unknown	coiled-coil domain containing 96
TRINITY_DN13571_c1_g1	400682.PAC_15707924	51.6	7.3e-217	COG0443	O	Posttranslational modification, protein turnover, chaperones	Heat shock protein
TRINITY_DN13572_c0_g1	7739.JGI271465	73.2	2.9e-120	COG0119	E	Amino acid transport and metabolism	Catalyzes the condensation of the acetyl group of acetyl-CoA with 3-methyl-2-oxobutanoate (2-oxoisovalerate) to form 3-carboxy-3-hydroxy-4-methylpentanoate (2-isopropylmalate) (By similarity)
TRINITY_DN13578_c0_g1	6945.ISCW003704-PA	50.7	1.3e-35	ENOG410XNVH	S	Function unknown	Solute carrier family 25 (Mitochondrial carrier
TRINITY_DN13578_c0_g3	6945.ISCW003704-PA	48.8	5.9e-70	ENOG410XNVH	S	Function unknown	Solute carrier family 25 (Mitochondrial carrier
TRINITY_DN13579_c1_g3	400682.PAC_15719309	51.8	6.8e-08	ENOG410Y8T9	S	Function unknown	zinc finger, BED-type containing 1
TRINITY_DN13585_c1_g1	400682.PAC_15728416	61.8	2.4e-93	ENOG4111V4J	O	Posttranslational modification, protein turnover, chaperones	negative regulation of signal transduction
TRINITY_DN13585_c1_g2	400682.PAC_15728417	75	0	ENOG410XPFQ	A	RNA processing and modification	Splicing factor 3b subunit
TRINITY_DN13586_c0_g1	9669.ENSMPUP00000002565	49.1	4.3e-42	COG1864	F	Nucleotide transport and metabolism	DNA RNA NON-specific endonuclease
TRINITY_DN13588_c0_g1	3847.GLYMA08G19700.2	30.4	6.2e-46	COG1819	S	Function unknown	Transferase
TRINITY_DN13590_c0_g1	43179.ENSSTOP00000023565	55.7	6.8e-43	ENOG4111QMZ	S	Function unknown	Neurotrophic factor
TRINITY_DN13590_c1_g1	400682.PAC_15711719	50.7	8.9e-75	COG2377	O	Posttranslational modification, protein turnover, chaperones	Catalyzes the specific phosphorylation of 1,6-anhydro-N- acetylmuramic acid (anhMurNAc) with the simultaneous cleavage of the 1,6-anhydro ring, generating MurNAc-6-P. Is required for the utilization of anhMurNAc either imported from the medium or derived from its own cell wall murein, and thus plays a role in cell wall recycling (By similarity)
TRINITY_DN13590_c1_g1	400682.PAC_15711719	50.7	8.9e-75	COG2940	S	Function unknown	Histone-lysine N-methyltransferase
TRINITY_DN13591_c0_g1	3847.GLYMA09G04510.1	69.1	1.4e-19	NA	NA	NA	NA
TRINITY_DN13592_c0_g1	45351.NEMVEDRAFT_v1g136508-PA	56.3	4.8e-44	COG1409	S	Function unknown	Hydrolyzes cAMP to 5'-AMP. Plays an important regulatory role in modulating the intracellular concentration of cAMP, thereby influencing cAMP-dependent processes (By similarity)
TRINITY_DN13592_c0_g2	400682.PAC_15714001	64	3.5e-95	COG2136	A	RNA processing and modification	u3 small nucleolar ribonucleoprotein
TRINITY_DN13592_c0_g2	400682.PAC_15714001	64	3.5e-95	COG2136	J	Translation, ribosomal structure and biogenesis	u3 small nucleolar ribonucleoprotein
TRINITY_DN13592_c0_g4	45351.NEMVEDRAFT_v1g227634-PA	51.2	1.6e-101	COG1409	S	Function unknown	Hydrolyzes cAMP to 5'-AMP. Plays an important regulatory role in modulating the intracellular concentration of cAMP, thereby influencing cAMP-dependent processes (By similarity)
TRINITY_DN13593_c0_g1	400682.PAC_15723749	44.3	4.4e-72	COG0790	S	Function unknown	Sel1 domain protein repeat-containing protein
TRINITY_DN13594_c0_g1	400682.PAC_15720417	70.1	7.4e-19	COG0666	S	Function unknown	Ankyrin Repeat
TRINITY_DN13594_c0_g2	7425.NV17876-PA	76.1	2.4e-163	ENOG410XNU9	S	Function unknown	retinoblastoma binding protein
TRINITY_DN13595_c0_g1	8364.ENSXETP00000023778	66.1	6.8e-89	COG1012	C	Energy production and conversion	Dehydrogenase
TRINITY_DN13595_c0_g2	45351.NEMVEDRAFT_v1g179476-PA	74.7	8.2e-110	COG1012	C	Energy production and conversion	Dehydrogenase
TRINITY_DN13597_c5_g1	400682.PAC_15721822	52.7	1.3e-26	ENOG410XQN5	S	Function unknown	member RAS oncogene family
TRINITY_DN13597_c5_g3	7955.ENSDARP00000124890	36.5	6.7e-17	ENOG410XSI8	S	Function unknown	chromosome 1 open reading frame 27
TRINITY_DN13597_c6_g1	400682.PAC_15723903	59	3.9e-123	COG1796	L	Replication, recombination and repair	DNA polymerase
TRINITY_DN13597_c6_g3	400682.PAC_15723903	50	2.6e-14	COG1796	L	Replication, recombination and repair	DNA polymerase
TRINITY_DN13598_c0_g1	400682.PAC_15720477	41	9e-54	NA	NA	NA	NA
TRINITY_DN13599_c0_g1	7227.FBpp0305357	43.9	1.9e-21	ENOG410XQJ2	S	Function unknown	Src homology 2 domain containing
TRINITY_DN13600_c3_g2	400682.PAC_15702531	51.8	2e-64	ENOG410ZJVJ	S	Function unknown	NA
TRINITY_DN13600_c5_g1	7668.SPU_008797tr	45.3	4.8e-32	ENOG4111UIS	S	Function unknown	NA
TRINITY_DN13601_c0_g1	400682.PAC_15727848	26.8	1.3e-37	COG2802	O	Posttranslational modification, protein turnover, chaperones	Peptidase S16, lon domain protein
TRINITY_DN13602_c0_g1	400682.PAC_15726176	32.6	2e-27	COG5024	D	Cell cycle control, cell division, chromosome partitioning	g2 mitotic-specific
TRINITY_DN13603_c0_g1	400682.PAC_15725739	58	7.4e-58	COG0515	T	Signal transduction mechanisms	Serine Threonine protein kinase
TRINITY_DN13605_c4_g1	13037.EHJ63972	86.2	8.8e-06	NA	NA	NA	NA
TRINITY_DN13605_c5_g1	400682.PAC_15728325	74.8	3e-97	ENOG410XSYS	S	Function unknown	phospholipid scramblase
TRINITY_DN13607_c0_g1	400682.PAC_15727370	58.1	1.5e-196	ENOG410XS6Y	S	Function unknown	protein Hydra magnipapillata
TRINITY_DN13609_c2_g1	400682.PAC_15726661	53.3	3.4e-76	ENOG410XTGU	S	Function unknown	resistance) protein
TRINITY_DN13609_c3_g8	45351.NEMVEDRAFT_v1g119730-PA	47.8	2.6e-105	ENOG41107C3	S	Function unknown	NA
TRINITY_DN13610_c1_g3	61853.ENSNLEP00000024027	27.3	1.7e-06	ENOG4111IF3	S	Function unknown	TRAF-type zinc finger domain containing 1
TRINITY_DN13610_c1_g5	400682.PAC_15725654	27.1	2.6e-23	NA	NA	NA	NA
TRINITY_DN13611_c0_g1	400682.PAC_15728582	62.3	6.7e-66	COG1100	S	Function unknown	GTP-binding Protein
TRINITY_DN13614_c0_g1	7668.SPU_011616tr	41.7	1.9e-09	ENOG4110ZMY	S	Function unknown	protein-kinase, interferon-inducible double stranded RNA dependent inhibitor, repressor of (P58 repressor)
TRINITY_DN13614_c1_g1	400682.PAC_15721063	25	4.9e-29	ENOG41100NC	S	Function unknown	chromosome 9 open reading frame 174
TRINITY_DN13614_c1_g2	6085.XP_002159377	52.8	3.3e-08	ENOG410XSJ6	S	Function unknown	WD repeat domain 24
TRINITY_DN13614_c1_g5	45351.NEMVEDRAFT_v1g198897-PA	24.7	1.1e-38	ENOG410XSQC	S	Function unknown	nhl repeat containing protein
TRINITY_DN13614_c1_g8	7029.ACYPI37784-PA	45.6	1.3e-06	NA	NA	NA	NA
TRINITY_DN13616_c0_g1	590409.Dd586_2787	42.4	6.2e-39	COG0693	S	Function unknown	PfpI family
TRINITY_DN13618_c0_g10	7668.SPU_028349tr	51.6	2.4e-63	COG2801	L	Replication, recombination and repair	Retrotransposon protein
TRINITY_DN13618_c0_g12	400682.PAC_15698566	36.7	5.6e-22	ENOG410ZTHQ	S	Function unknown	NA
TRINITY_DN13618_c0_g4	400682.PAC_15698949	56.5	1e-127	COG2801	L	Replication, recombination and repair	Retrotransposon protein
TRINITY_DN13618_c0_g6	400682.PAC_15711564	36.1	4.9e-39	NA	NA	NA	NA
TRINITY_DN13618_c0_g8	7668.SPU_001414tr	69.1	7.7e-20	COG2801	L	Replication, recombination and repair	Retrotransposon protein
TRINITY_DN13620_c0_g1	457429.SSDG_03957	63	6.1e-11	ENOG410Z6A0	S	Function unknown	NA
TRINITY_DN13620_c0_g2	575564.HMPREF0014_03572	86.1	3.9e-11	NA	NA	NA	NA
TRINITY_DN13620_c0_g3	224914.BAWG_3065	91.4	8.3e-22	ENOG4111PC4	S	Function unknown	Pfam:Cw-hydrolase
TRINITY_DN13622_c2_g2	400682.PAC_15707257	61.1	1.2e-17	NA	NA	NA	NA
TRINITY_DN13624_c1_g1	224914.BAWG_3064	67.7	1e-16	ENOG41129MV	S	Function unknown	NA
TRINITY_DN13624_c1_g3	498761.HM1_3125	73.2	6.7e-08	NA	NA	NA	NA
TRINITY_DN13625_c1_g2	7739.JGI85948	45.2	4.5e-12	ENOG4111G04	S	Function unknown	tripartite motif containing
TRINITY_DN13625_c1_g8	400682.PAC_15722402	68.5	1.7e-66	ENOG410XRJF	Q	Secondary metabolites biosynthesis, transport and catabolism	ectoine hydroxylase
TRINITY_DN13625_c1_g9	400682.PAC_15712341	72.3	9.5e-38	ENOG410XRJF	Q	Secondary metabolites biosynthesis, transport and catabolism	ectoine hydroxylase
TRINITY_DN13627_c0_g1	8128.ENSONIP00000002319	54.8	1.7e-35	ENOG410XSN1	O	Posttranslational modification, protein turnover, chaperones	Lysyl oxidase-like
TRINITY_DN13627_c0_g3	400682.PAC_15718230	39.4	2.1e-142	ENOG410XSN1	O	Posttranslational modification, protein turnover, chaperones	Lysyl oxidase-like
TRINITY_DN13631_c0_g1	7897.ENSLACP00000004523	65.9	4e-73	ENOG4110BDM	S	Function unknown	RAB23, member RAS oncogene family
TRINITY_DN13631_c1_g1	45351.NEMVEDRAFT_v1g239245-PA	58.3	1.3e-98	ENOG410XPGR	U	Intracellular trafficking, secretion, and vesicular transport	Intraflagellar transport 52 homolog (Chlamydomonas)
TRINITY_DN13631_c1_g2	9031.ENSGALP00000026392	65.6	1.1e-65	ENOG410ZYKB	J	Translation, ribosomal structure and biogenesis	ribosomal protein S7
TRINITY_DN13633_c1_g3	45351.NEMVEDRAFT_v1g96536-PA	66.2	3.1e-20	COG5260	L	Replication, recombination and repair	domain) containing
TRINITY_DN13634_c6_g2	10228.TriadP53215	45.6	5.2e-36	ENOG410XPNE	I	Lipid transport and metabolism	Hydroxysteroid (17-beta) dehydrogenase 7
TRINITY_DN13636_c0_g1	400682.PAC_15719362	42.6	8.2e-96	ENOG410Y7Z8	K	Transcription	Neuronal PAS domain protein 2
TRINITY_DN13637_c0_g2	7719.ENSCINP00000020998	41.8	1.6e-36	COG5226	A	RNA processing and modification	Second step of mRNA capping. Transfer of the GMP moiety of GTP to the 5'-end of RNA via an enzyme-GMP covalent reaction intermediate (By similarity)
TRINITY_DN13638_c3_g5	7739.JGI121310	40	5.7e-63	ENOG4111Z8I	K	Transcription	Involved both in the piRNA and miRNA metabolic processes. As a component of the meiotic nuage, plays a central role during oogenesis by repressing transposable elements and prevent their mobilization, which is essential for the germline integrity. Repression of transposable elements is mediated via the piRNA metabolic process, which mediates the repression of transposable elements during meiosis …
TRINITY_DN13641_c0_g1	400682.PAC_15720611	49.5	5.3e-18	ENOG410XPPJ	S	Function unknown	sh2 domain containing
TRINITY_DN13641_c0_g2	400682.PAC_15720609	60.4	2.2e-94	COG5064	U	Intracellular trafficking, secretion, and vesicular transport	importin subunit alpha
TRINITY_DN13642_c1_g2	400682.PAC_15725914	43.7	1.4e-90	ENOG410XTAN	S	Function unknown	Ring finger protein
TRINITY_DN13643_c1_g1	7739.JGI119531	51.8	4.3e-69	ENOG410ZNZ9	S	Function unknown	coiled-coil domain containing 39
TRINITY_DN13643_c3_g2	7739.JGI119065	49	2e-170	ENOG410XQ9T	T	Signal transduction mechanisms	SCY1-like 2 (S. cerevisiae)
TRINITY_DN13643_c3_g3	45351.NEMVEDRAFT_v1g169538-PA	61.4	4.4e-199	COG0405	E	Amino acid transport and metabolism	gamma-glutamyltransferase activity
TRINITY_DN13643_c3_g4	400682.PAC_15719219	56.3	2.2e-100	ENOG410XQFV	S	Function unknown	High density lipoprotein binding protein
TRINITY_DN13644_c0_g13	7739.JGI208834	85.8	2.6e-86	ENOG410XRC5	O	Posttranslational modification, protein turnover, chaperones	ubiquitin-conjugating enzyme
TRINITY_DN13644_c0_g2	10228.TriadP55610	27.5	3.4e-47	ENOG410YGU3	J	Translation, ribosomal structure and biogenesis	Plays a central role in 2-thiolation of mcm(5)S(2)U at tRNA wobble positions of tRNA(Lys), tRNA(Glu) and tRNA(Gln). May act by forming a heterodimer with NCS6 that ligates sulfur from thiocarboxylated URM1 onto the uridine of tRNAs at wobble position. Prior mcm(5) tRNA modification by the elongator complex is required for 2-thiolation. May also be involved in protein urmylation (By similarity)
TRINITY_DN13649_c1_g1	240176.XP_001839071.1	29.2	9.8e-16	ENOG410ZHQS	S	Function unknown	NA
TRINITY_DN13650_c0_g1	45351.NEMVEDRAFT_v1g158777-PA	55.8	7.4e-67	COG5160	O	Posttranslational modification, protein turnover, chaperones	SUMO1 sentrin specific peptidase
TRINITY_DN13651_c1_g2	6085.XP_002167973	45.5	1e-27	COG2801	L	Replication, recombination and repair	Retrotransposon protein
TRINITY_DN13654_c0_g3	400682.PAC_15720181	78.1	1.6e-177	ENOG410XPET	T	Signal transduction mechanisms	dual-specificity tyrosine-(Y)-phosphorylation regulated kinase
TRINITY_DN13657_c0_g1	400682.PAC_15710985	34.1	3.5e-84	ENOG410XNSR	T	Signal transduction mechanisms	erythroblastic leukemia viral oncogene homolog
TRINITY_DN13658_c0_g1	400682.PAC_15722643	59.6	2.7e-103	ENOG410ZS1T	S	Function unknown	NA
TRINITY_DN13658_c1_g3	400682.PAC_15723322	38.5	1.5e-20	ENOG410YYBE	S	Function unknown	g patch domain and KOW
TRINITY_DN13659_c0_g1	6334.EFV61764	65.4	3.9e-26	COG2801	L	Replication, recombination and repair	Retrotransposon protein
TRINITY_DN13659_c2_g4	6334.EFV51345	56.2	3.9e-17	COG2801	L	Replication, recombination and repair	Retrotransposon protein
TRINITY_DN13660_c0_g1	9258.ENSOANP00000026365	46.3	8.1e-39	COG1564	H	Coenzyme transport and metabolism	thiamine diphosphokinase activity
TRINITY_DN13660_c0_g2	45351.NEMVEDRAFT_v1g247454-PA	29.7	1e-06	ENOG4111HTD	S	Function unknown	DAZ interacting protein
TRINITY_DN13661_c0_g2	400682.PAC_15715315	66.9	1.5e-50	ENOG410XQ6E	S	Function unknown	Phd finger protein
TRINITY_DN13662_c3_g1	400682.PAC_15710851	46.8	6.1e-71	ENOG4111FFY	S	Function unknown	EF hand family protein
TRINITY_DN13662_c3_g2	7739.JGI203403	41.2	6.8e-84	ENOG410YDZ6	S	Function unknown	porcupine homolog (Drosophila)
TRINITY_DN13662_c4_g1	400682.PAC_15716611	86.3	3.9e-253	COG0056	C	Energy production and conversion	Produces ATP from ADP in the presence of a proton gradient across the membrane. The alpha chain is a regulatory subunit (By similarity)
TRINITY_DN13663_c0_g1	400682.PAC_15714548	46	2.3e-73	ENOG410ZHK4	S	Function unknown	AIG1 family
TRINITY_DN13663_c0_g2	400682.PAC_15704723	57.4	3.2e-49	ENOG410ZHK4	S	Function unknown	AIG1 family
TRINITY_DN13664_c0_g6	400682.PAC_15727184	62.2	6.9e-09	COG2801	L	Replication, recombination and repair	Retrotransposon protein
TRINITY_DN13665_c0_g1	7739.JGI90416	31.9	7.5e-28	ENOG41104SS	S	Function unknown	Bacterial Ig-like domain protein
TRINITY_DN13666_c2_g2	7668.SPU_027579tr	47.4	5.6e-72	ENOG410YKAG	S	Function unknown	RIB43A domain with coiled-coils
TRINITY_DN13666_c2_g4	400682.PAC_15720532	60.4	1.8e-92	ENOG410XSI1	U	Intracellular trafficking, secretion, and vesicular transport	Vacuolar Protein
TRINITY_DN13667_c0_g2	400682.PAC_15703420	50.4	4.3e-96	ENOG410XPFS	U	Intracellular trafficking, secretion, and vesicular transport	Adaptor-related protein complex
TRINITY_DN13669_c0_g2	7897.ENSLACP00000005771	34	7.4e-40	ENOG4111U08	S	Function unknown	Endonuclease/Exonuclease/phosphatase family
TRINITY_DN13670_c0_g1	744980.TRICHSKD4_6296	72.7	1.3e-08	NA	NA	NA	NA
TRINITY_DN13671_c2_g1	7739.JGI251653	52.6	2.8e-51	ENOG41121N2	O	Posttranslational modification, protein turnover, chaperones	zinc ion binding
TRINITY_DN13671_c2_g5	400682.PAC_15717123	60.5	2.5e-242	COG0465	O	Posttranslational modification, protein turnover, chaperones	Acts as a processive, ATP-dependent zinc metallopeptidase for both cytoplasmic and membrane proteins. Plays a role in the quality control of integral membrane proteins (By similarity)
TRINITY_DN13671_c2_g8	8083.ENSXMAP00000015114	73	7.7e-34	COG0202	K	Transcription	DNA-dependent RNA polymerase catalyzes the transcription of DNA into RNA using the four ribonucleoside triphosphates as substrates (By similarity)
TRINITY_DN13675_c0_g1	457424.BFAG_04907	67.7	2.2e-12	NA	NA	NA	NA
TRINITY_DN13675_c0_g2	457424.BFAG_04907	64.5	1.4e-11	NA	NA	NA	NA
TRINITY_DN13675_c1_g1	411467.BACCAP_04474	67.4	6.9e-26	ENOG4111VRG	S	Function unknown	NA
TRINITY_DN13675_c1_g3	498761.HM1_3147	80.5	5e-08	ENOG410Y22D	S	Function unknown	NA
TRINITY_DN13676_c1_g1	400682.PAC_15713601	42.1	3.5e-42	ENOG410XRTN	S	Function unknown	U-box domain-containing protein
TRINITY_DN13676_c1_g2	10116.ENSRNOP00000002309	35.8	8.7e-63	ENOG410XTF7	O	Posttranslational modification, protein turnover, chaperones	deafness, autosomal recessive 31
TRINITY_DN13676_c1_g6	400682.PAC_15723194	55.3	5.7e-27	NA	NA	NA	NA
TRINITY_DN13677_c0_g1	400682.PAC_15728191	39.5	5.9e-105	ENOG410XSE0	G	Carbohydrate transport and metabolism	Major Facilitator superfamily
TRINITY_DN13679_c0_g1	8364.ENSXETP00000058485	53.8	7.9e-09	ENOG41122TT	S	Function unknown	Zinc finger, CDGSH-type domain protein
TRINITY_DN13679_c0_g2	7739.JGI99085	58.3	4.8e-58	ENOG410YG4B	O	Posttranslational modification, protein turnover, chaperones	parkinson protein 2, E3 ubiquitin protein ligase (parkin)
TRINITY_DN13680_c1_g5	400682.PAC_15725740	58.8	1.3e-20	ENOG4111NS1	S	Function unknown	Golgin A7
TRINITY_DN13680_c2_g1	12957.ACEP_00010293-PA	52.1	3.7e-192	COG0666	S	Function unknown	Ankyrin Repeat
TRINITY_DN13681_c0_g1	400682.PAC_15727613	35.3	1.6e-38	ENOG410XS9I	S	Function unknown	DiGeorge syndrome critical region gene 8
TRINITY_DN13682_c0_g1	400682.PAC_15720487	45.3	1.2e-90	COG5184	D	Cell cycle control, cell division, chromosome partitioning	regulator of chromosome condensation
TRINITY_DN13682_c0_g1	400682.PAC_15720487	45.3	1.2e-90	COG5184	Z	Cytoskeleton	regulator of chromosome condensation
TRINITY_DN13683_c0_g2	400682.PAC_15720134	58.4	4.1e-74	ENOG410YHAE	S	Function unknown	NA
TRINITY_DN13685_c0_g1	400682.PAC_15726683	33	6.3e-09	ENOG410Y5WM	S	Function unknown	Kelch domain containing
TRINITY_DN13685_c0_g2	69293.ENSGACP00000014011	24.8	8.5e-08	ENOG410Y5WM	S	Function unknown	Kelch domain containing
TRINITY_DN13686_c0_g2	400682.PAC_15728380	48.1	7.8e-146	COG5059	Z	Cytoskeleton	Kinesin family member
TRINITY_DN13686_c0_g4	7029.ACYPI008983-PA	84.1	1.6e-72	COG1889	J	Translation, ribosomal structure and biogenesis	Involved in pre-rRNA and tRNA processing. Utilizes the methyl donor S-adenosyl-L-methionine to catalyze the site-specific 2'-hydroxyl methylation of ribose moieties in rRNA and tRNA. Site specificity is provided by a guide RNA that base pairs with the substrate. Methylation occurs at a characteristic distance from the sequence involved in base pairing with the guide RNA (By similarity)
TRINITY_DN13686_c0_g5	7739.JGI223800	24.9	2.7e-06	ENOG4111YM1	U	Intracellular trafficking, secretion, and vesicular transport	dystrobrevin binding protein 1
TRINITY_DN13686_c0_g6	6085.XP_002168049	85.7	6.9e-38	COG1889	J	Translation, ribosomal structure and biogenesis	Involved in pre-rRNA and tRNA processing. Utilizes the methyl donor S-adenosyl-L-methionine to catalyze the site-specific 2'-hydroxyl methylation of ribose moieties in rRNA and tRNA. Site specificity is provided by a guide RNA that base pairs with the substrate. Methylation occurs at a characteristic distance from the sequence involved in base pairing with the guide RNA (By similarity)
TRINITY_DN13687_c0_g1	400682.PAC_15717048	50	5.5e-78	COG2801	L	Replication, recombination and repair	Retrotransposon protein
TRINITY_DN13688_c0_g1	465541.SSAG_05516	45.8	6.8e-12	NA	NA	NA	NA
TRINITY_DN13689_c0_g1	400682.PAC_15702501	57.7	6.3e-53	COG1100	S	Function unknown	GTP-binding Protein
TRINITY_DN13689_c0_g3	400682.PAC_15724379	52.1	4.5e-16	ENOG410Y3GP	S	Function unknown	LIM protein
TRINITY_DN13690_c1_g4	6085.XP_002160652	68.3	1.4e-08	NA	NA	NA	NA
TRINITY_DN13692_c0_g3	400682.PAC_15715074	49.6	3e-98	ENOG410XRIE	S	Function unknown	tumor suppressing subtransferable candidate 1
TRINITY_DN13692_c1_g3	7668.SPU_000062tr	98.8	3.8e-242	COG5023	Z	Cytoskeleton	protein polymerization
TRINITY_DN13692_c1_g4	45351.NEMVEDRAFT_v1g166546-PA	71.7	9.8e-89	COG1756	J	Translation, ribosomal structure and biogenesis	Methyltransferase involved in ribosomal biogenesis. Specifically catalyzes the N1-methylation of the pseudouridine corresponding to position 914 in M.jannaschii 16S rRNA (By similarity)
TRINITY_DN13694_c2_g2	400682.PAC_15720026	43	1.2e-43	ENOG410XP79	S	Function unknown	glucuronosyltransferase
TRINITY_DN13694_c3_g1	400682.PAC_15722113	47.6	3.4e-84	COG5347	U	Intracellular trafficking, secretion, and vesicular transport	domain, ankyrin repeat and PH domain
TRINITY_DN13695_c3_g3	7897.ENSLACP00000010849	57.6	2.8e-87	COG0579	C	Energy production and conversion	malate dehydrogenase (quinone)
TRINITY_DN13695_c3_g4	400682.PAC_15715130	54.3	1.9e-132	COG0484	O	Posttranslational modification, protein turnover, chaperones	ATP binding to DnaK triggers the release of the substrate protein, thus completing the reaction cycle. Several rounds of ATP-dependent interactions between DnaJ, DnaK and GrpE are required for fully efficient folding. Also involved, together with DnaK and GrpE, in the DNA replication of plasmids through activation of initiation proteins (By similarity)
TRINITY_DN13695_c3_g6	400682.PAC_15725800	54.9	3e-30	COG0558	I	Lipid transport and metabolism	cdp-diacylglycerol-glycerol-3-phosphate 3-phosphatidyltransferase
TRINITY_DN13695_c3_g8	9031.ENSGALP00000020045	66	9.4e-45	COG0579	C	Energy production and conversion	malate dehydrogenase (quinone)
TRINITY_DN13697_c3_g1	400682.PAC_15724222	38.1	1.1e-65	ENOG410YMJD	K	Transcription	Regulator of G-protein signaling
TRINITY_DN13697_c3_g5	400682.PAC_15724292	51.6	1.4e-95	ENOG410XQCJ	K	Transcription	Interleukin enhancer binding factor 2
TRINITY_DN13697_c3_g9	400682.PAC_15719628	38.9	2.3e-63	ENOG410XS7N	S	Function unknown	synaptotagmin VII
TRINITY_DN13700_c0_g2	88036.EFJ17269	35.4	6e-53	COG1112	L	Replication, recombination and repair	Helicase
TRINITY_DN13701_c3_g3	400682.PAC_15713479	34.4	5.3e-48	NA	NA	NA	NA
TRINITY_DN13701_c3_g5	7739.JGI123986	70.8	3e-159	COG1241	L	Replication, recombination and repair	dna replication licensing factor
TRINITY_DN13702_c0_g1	400682.PAC_15723441	54	1.6e-186	COG1874	G	Carbohydrate transport and metabolism	beta-galactosidase
TRINITY_DN13703_c0_g1	400682.PAC_15724054	87.3	9.2e-174	ENOG410XPVF	T	Signal transduction mechanisms	serine threonine-protein phosphatase
TRINITY_DN13705_c0_g1	7739.JGI91066	30.9	8.3e-28	COG3155	Q	Secondary metabolites biosynthesis, transport and catabolism	Isoprenoid biosynthesis protein with amidotransferase-like domain
TRINITY_DN13705_c1_g2	400682.PAC_15726840	38	4.3e-64	COG0235	G	Carbohydrate transport and metabolism	Class II aldolase adducin
TRINITY_DN13709_c3_g4	400682.PAC_15715535	44.4	1.9e-61	ENOG410XQM6	K	Transcription	Forms a fork protection complex (FPC) with csm-3 and which is required for chromosome segregation during meiosis and DNA damage repair. FPC coordinates leading and lagging strand synthesis and moves with the replication fork. FPC stabilizes replication forks in a configuration that is recognized by replication checkpoint sensors
TRINITY_DN13709_c3_g7	400682.PAC_15716069	46.2	5.1e-54	ENOG410ZV52	S	Function unknown	NA
TRINITY_DN13710_c4_g3	45351.NEMVEDRAFT_v1g227987-PA	78.7	4e-134	COG0207	F	Nucleotide transport and metabolism	Provides the sole de novo source of dTMP for DNA biosynthesis (By similarity)
TRINITY_DN13710_c4_g4	400682.PAC_15712828	50.2	6.2e-191	ENOG410YEKG	S	Function unknown	tubby like protein 4
TRINITY_DN13711_c1_g1	7897.ENSLACP00000003121	54.5	1.7e-32	ENOG4111KQW	S	Function unknown	NA
TRINITY_DN13713_c1_g1	7955.ENSDARP00000106471	51.3	4.4e-15	ENOG4111MZ8	S	Function unknown	NA
TRINITY_DN13713_c2_g2	28377.ENSACAP00000010785	40.5	1.5e-69	COG5084	S	Function unknown	zinc finger
TRINITY_DN13716_c2_g1	8128.ENSONIP00000002054	49.5	2.5e-19	ENOG410YGXU	O	Posttranslational modification, protein turnover, chaperones	UBX domain protein
TRINITY_DN13716_c2_g2	400682.PAC_15713710	32.3	3.9e-14	ENOG410YGXU	O	Posttranslational modification, protein turnover, chaperones	UBX domain protein
TRINITY_DN13716_c2_g3	6945.ISCW011518-PA	30.3	1e-15	ENOG410ZMB5	S	Function unknown	pleckstrin homology domain containing, family M
TRINITY_DN13722_c0_g10	9601.ENSPPYP00000008655	37.2	3.9e-62	ENOG410XP8S	S	Function unknown	Differentially expressed in FDCP 8 homolog
TRINITY_DN13722_c0_g8	7739.JGI117980	56.4	4.5e-11	COG0605	P	Inorganic ion transport and metabolism	Destroys radicals which are normally produced within the cells and which are toxic to biological systems (By similarity)
TRINITY_DN13723_c0_g1	400682.PAC_15721511	51.4	1.1e-10	ENOG410ZJAF	O	Posttranslational modification, protein turnover, chaperones	homocysteine-inducible, endoplasmic reticulum stress-inducible, ubiquitin-like domain member 1
TRINITY_DN13723_c0_g3	243274.TM0212	49.2	4.2e-32	COG0509	E	Amino acid transport and metabolism	The glycine cleavage system catalyzes the degradation of glycine. The H protein shuttles the methylamine group of glycine from the P protein to the T protein (By similarity)
TRINITY_DN13724_c3_g3	400682.PAC_15721381	31.9	1.2e-26	ENOG410ZPRK	S	Function unknown	NA
TRINITY_DN13728_c0_g1	45351.NEMVEDRAFT_v1g212666-PA	40.7	5.8e-17	ENOG41117DQ	S	Function unknown	PX
TRINITY_DN13728_c0_g4	400682.PAC_15725905	49.3	7.9e-30	ENOG4111HEE	S	Function unknown	transmembrane protein 70
TRINITY_DN13729_c1_g2	400682.PAC_15722614	57.5	1.9e-47	ENOG4111IMV	U	Intracellular trafficking, secretion, and vesicular transport	P2X receptors are ATP-gated ion channels that play a role in intracellular calcium signaling. Not required for the purinergic response to extracellular nucleotides
TRINITY_DN13730_c0_g1	4950.XP_003678821.1	36.7	3.3e-06	ENOG410XTSY	U	Intracellular trafficking, secretion, and vesicular transport	signal transducing adaptor molecule (SH3 domain and ITAM motif)
TRINITY_DN13731_c2_g1	400682.PAC_15721807	43.5	1.6e-62	ENOG410XQ67	T	Signal transduction mechanisms	Budding uninhibited by benzimidazoles 1 homolog
TRINITY_DN13731_c3_g1	400682.PAC_15720690	76.9	2.1e-58	ENOG410XPD0	S	Function unknown	Ras-related protein
TRINITY_DN13734_c1_g9	9031.ENSGALP00000017154	45.1	4.5e-11	ENOG41101S6	S	Function unknown	family with sequence similarity 82, member
TRINITY_DN13737_c0_g1	10020.ENSDORP00000008486	46	2.9e-39	ENOG410XQFB	U	Intracellular trafficking, secretion, and vesicular transport	Adaptor-related protein complex 3, delta 1 subunit
TRINITY_DN13741_c0_g1	10090.ENSMUSP00000110349	47.3	1.5e-35	COG2340	S	Function unknown	Scp-like extracellular
TRINITY_DN13742_c0_g2	400682.PAC_15722261	46.5	1.1e-66	ENOG410Z5NV	Z	Cytoskeleton	Growth arrest-specific 7
TRINITY_DN13743_c0_g1	400682.PAC_15723302	61.3	2.9e-99	ENOG410XNXM	S	Function unknown	Family with sequence similarity 50, member
TRINITY_DN13746_c3_g2	45351.NEMVEDRAFT_v1g160457-PA	56.6	6.7e-55	ENOG410XPUI	S	Function unknown	member RAS oncogene family
TRINITY_DN13747_c0_g4	400682.PAC_15722726	72.7	1e-80	ENOG410XT3C	S	Function unknown	neuralized homolog 4 (Drosophila)
TRINITY_DN13748_c0_g1	400682.PAC_15714450	63.2	6.7e-25	COG0515	T	Signal transduction mechanisms	Serine Threonine protein kinase
TRINITY_DN13748_c0_g3	400682.PAC_15721469	57.1	6.5e-134	COG1071	C	Energy production and conversion	Dehydrogenase
TRINITY_DN13749_c2_g1	457425.SSHG_04800	64.1	6.9e-07	ENOG410Z56V	S	Function unknown	NA
TRINITY_DN13749_c2_g3	457425.SSHG_04800	46.7	3.8e-11	ENOG410Z56V	S	Function unknown	NA
TRINITY_DN13749_c2_g4	457425.SSHG_04800	50.8	3.4e-08	ENOG410Z56V	S	Function unknown	NA
TRINITY_DN1374_c0_g1	37347.ENSTBEP00000001080	85.5	2.4e-16	COG5022	Z	Cytoskeleton	myosin heavy chain
TRINITY_DN13750_c0_g1	400682.PAC_15721674	38.5	1.5e-08	NA	NA	NA	NA
TRINITY_DN13750_c1_g1	400682.PAC_15720666	36.8	1.4e-82	COG5056	I	Lipid transport and metabolism	Oacyltransferase
TRINITY_DN13750_c1_g4	400682.PAC_15709892	56.6	3.7e-216	ENOG410YC1K	S	Function unknown	Colon cancer-associated protein Mic1-like
TRINITY_DN13758_c0_g1	400682.PAC_15719690	36.3	2.7e-14	COG4995	S	Function unknown	tetratricopeptide repeat domain
TRINITY_DN13759_c0_g1	10228.TriadP52543	35.1	3e-57	ENOG410ZJEB	S	Function unknown	peptidase c45 acyl-coenzyme a 6-aminopenicillanic acid acyl-transferase
TRINITY_DN13760_c0_g2	748671.LCRIS_00061	55.1	1.8e-20	ENOG410Y13W	S	Function unknown	PG1 protein, homology to Homo sapiens
TRINITY_DN13760_c0_g3	748671.LCRIS_00061	59.6	5.1e-11	ENOG410Y13W	S	Function unknown	PG1 protein, homology to Homo sapiens
TRINITY_DN13760_c0_g5	748671.LCRIS_00061	67.2	4.4e-13	ENOG410Y13W	S	Function unknown	PG1 protein, homology to Homo sapiens
TRINITY_DN13760_c0_g6	4113.PGSC0003DMT400086496	75.4	5e-41	COG0048	J	Translation, ribosomal structure and biogenesis	Interacts with and stabilizes bases of the 16S rRNA that are involved in tRNA selection in the A site and with the mRNA backbone. Located at the interface of the 30S and 50S subunits, it traverses the body of the 30S subunit contacting proteins on the other side and probably holding the rRNA structure together. The combined cluster of proteins S8, S12 and S17 appears to hold together the shoulder…
TRINITY_DN13761_c0_g2	9813.ENSPCAP00000003263	29.2	3.6e-28	COG1112	L	Replication, recombination and repair	Helicase
TRINITY_DN13762_c0_g1	400682.PAC_15719702	40.8	5.2e-36	ENOG4111MU9	T	Signal transduction mechanisms	Rho guanine nucleotide exchange factor (GEF) 33
TRINITY_DN13762_c0_g2	7739.JGI289042	62	4.3e-35	ENOG411224Q	K	Transcription	LSM1 homolog, U6 small nuclear RNA associated (S. cerevisiae)
TRINITY_DN13764_c0_g2	5911.EAR85162	49.3	3.3e-33	COG3236	S	Function unknown	Swarming motility protein YbiA
TRINITY_DN13767_c1_g2	224911.blr3677	78.5	1e-27	ENOG410XRJ2	Q	Secondary metabolites biosynthesis, transport and catabolism	methane phenol toluene hydroxylase
TRINITY_DN13767_c1_g3	349163.Acry_1381	98.3	2.1e-136	ENOG410XRJ2	Q	Secondary metabolites biosynthesis, transport and catabolism	methane phenol toluene hydroxylase
TRINITY_DN13767_c1_g4	349163.Acry_1381	90.1	2.7e-43	ENOG410XRJ2	Q	Secondary metabolites biosynthesis, transport and catabolism	methane phenol toluene hydroxylase
TRINITY_DN13768_c2_g10	400682.PAC_15724446	77.9	1.1e-100	COG2101	K	Transcription	General factor that plays a role in the activation of archaeal genes transcribed by RNA polymerase. Binds specifically to the TATA box promoter element which lies close to the position of transcription initiation (By similarity)
TRINITY_DN13770_c0_g2	7739.JGI213445	50	1.7e-36	ENOG4110CGV	S	Function unknown	chromosome 10 open reading frame 118
TRINITY_DN13771_c0_g2	7668.SPU_003095tr	53.4	1.1e-14	COG2801	L	Replication, recombination and repair	Retrotransposon protein
TRINITY_DN13771_c5_g1	7739.JGI109391	53.7	7.2e-06	ENOG410XP6K	S	Function unknown	Notch ligand involved in the mediation of Notch signaling (By similarity)
TRINITY_DN13771_c5_g1	7739.JGI109391	53.7	7.2e-06	ENOG410XPJ1	S	Function unknown	c-type lectin domain family
TRINITY_DN13771_c5_g1	7739.JGI109391	53.7	7.2e-06	ENOG410XTGE	S	Function unknown	Polycystic kidney disease
TRINITY_DN13773_c1_g4	30611.ENSOGAP00000005648	54	3.4e-48	ENOG410XWAZ	U	Intracellular trafficking, secretion, and vesicular transport	Intraflagellar transport 74 homolog (Chlamydomonas)
TRINITY_DN13773_c1_g5	7668.SPU_018337tr	41	7.2e-34	ENOG410XWAZ	U	Intracellular trafficking, secretion, and vesicular transport	Intraflagellar transport 74 homolog (Chlamydomonas)
TRINITY_DN13776_c4_g2	400682.PAC_15721969	56.9	1.6e-154	COG0446	S	Function unknown	pyridine nucleotide-disulfide oxidoreductase
TRINITY_DN13777_c0_g1	400682.PAC_15723564	44.8	5.5e-45	COG0666	S	Function unknown	Ankyrin Repeat
TRINITY_DN13779_c1_g1	6085.XP_002156367	44.6	2.7e-07	ENOG410ZZ84	S	Function unknown	NA
TRINITY_DN13780_c0_g1	400682.PAC_15728174	57.2	7.8e-171	COG0491	S	Function unknown	Beta-lactamase domain protein
TRINITY_DN13781_c0_g1	400682.PAC_15717413	40	5.4e-147	ENOG410ZXFZ	S	Function unknown	NA
TRINITY_DN13781_c0_g2	7739.JGI120093	66.7	1.4e-34	ENOG410ZXFZ	S	Function unknown	NA
TRINITY_DN13782_c1_g1	400682.PAC_15701903	44.6	4.9e-28	COG0666	S	Function unknown	Ankyrin Repeat
TRINITY_DN13783_c0_g1	7668.SPU_003098tr	38.1	3.8e-69	ENOG4111YZS	S	Function unknown	YeeE YedE family protein
TRINITY_DN13784_c0_g1	400682.PAC_15719740	63.5	8.8e-65	COG0846	K	Transcription	NAD-dependent protein deacetylase which modulates the activities of several enzymes which are inactive in their acetylated form
TRINITY_DN13785_c0_g1	9258.ENSOANP00000007299	46.7	1.4e-84	ENOG410XPV6	S	Function unknown	cysteine and histidine-rich domain (CHORD) containing 1
TRINITY_DN13786_c0_g3	400682.PAC_15728248	37.3	3.5e-41	ENOG410ZVBX	O	Posttranslational modification, protein turnover, chaperones	NADPH oxidase organizer 1
TRINITY_DN13787_c0_g1	45351.NEMVEDRAFT_v1g167786-PA	65.1	2.4e-293	COG0008	J	Translation, ribosomal structure and biogenesis	Catalyzes the attachment of glutamate to tRNA(Glu) in a two-step reaction glutamate is first activated by ATP to form Glu-AMP and then transferred to the acceptor end of tRNA(Glu) (By similarity)
TRINITY_DN13788_c0_g1	400682.PAC_15721815	49	4.8e-21	ENOG41126IA	S	Function unknown	Aprataxin and PNKP like factor
TRINITY_DN13788_c0_g3	400682.PAC_15721839	47.6	1.4e-45	COG5126	D	Cell cycle control, cell division, chromosome partitioning	Calcium-binding protein
TRINITY_DN13788_c0_g3	400682.PAC_15721839	47.6	1.4e-45	COG5126	T	Signal transduction mechanisms	Calcium-binding protein
TRINITY_DN13788_c0_g3	400682.PAC_15721839	47.6	1.4e-45	COG5126	Z	Cytoskeleton	Calcium-binding protein
TRINITY_DN13789_c0_g1	400682.PAC_15714351	48.1	1.2e-17	COG5210	S	Function unknown	TBC1 domain family member
TRINITY_DN13789_c0_g2	400682.PAC_15724668	63.6	7.8e-94	ENOG410XX8E	S	Function unknown	Poly(U)-specific
TRINITY_DN13792_c0_g1	121225.PHUM137520-PA	69.4	4.6e-128	ENOG410XP4S	S	Function unknown	Calcium binding protein
TRINITY_DN13794_c1_g1	400682.PAC_15724070	42.7	1.2e-17	COG0123	B	Chromatin structure and dynamics	Histone deacetylase
TRINITY_DN13794_c1_g1	400682.PAC_15724070	42.7	1.2e-17	COG0123	Q	Secondary metabolites biosynthesis, transport and catabolism	Histone deacetylase
TRINITY_DN13795_c0_g1	400682.PAC_15714897	71.6	1.6e-142	ENOG410XQVT	I	Lipid transport and metabolism	sphingolipid delta-4 desaturase activity
TRINITY_DN13795_c0_g2	7425.NV16049-PA	67	5.8e-35	COG0316	S	Function unknown	Iron--sulfur cluster
TRINITY_DN13796_c2_g2	400682.PAC_15702119	38.1	2.9e-16	NA	NA	NA	NA
TRINITY_DN13798_c2_g2	7739.JGI129997	50.4	7.5e-90	COG0042	J	Translation, ribosomal structure and biogenesis	Catalyzes the synthesis of dihydrouridine a modified base found in the D-loop of most tRNAs (By similarity)
TRINITY_DN13800_c0_g1	400682.PAC_15719543	68.8	7.5e-139	ENOG410XPRW	I	Lipid transport and metabolism	sterol carrier protein
TRINITY_DN13800_c0_g11	44689.DDB0216178	30.1	5.1e-67	ENOG410YYPB	S	Function unknown	Sphingomyelin phosphodiesterase
TRINITY_DN13800_c0_g3	10228.TriadP57222	33.6	5.9e-85	COG5214	L	Replication, recombination and repair	DNA polymerase alpha
TRINITY_DN13800_c0_g4	400682.PAC_15723081	45.4	2e-55	ENOG410XPUI	S	Function unknown	member RAS oncogene family
TRINITY_DN13800_c0_g6	45351.NEMVEDRAFT_v1g244001-PA	57.5	7.7e-37	COG2163	J	Translation, ribosomal structure and biogenesis	(ribosomal) protein
TRINITY_DN13800_c0_g8	8128.ENSONIP00000024565	42.4	3.8e-50	ENOG41102YK	S	Function unknown	methyltransferase like 9
TRINITY_DN13802_c2_g4	400682.PAC_15720168	34.8	9.3e-81	ENOG410XSUE	S	Function unknown	activating signal cointegrator 1 complex subunit 2
TRINITY_DN13802_c2_g7	400682.PAC_15702243	43.2	3.2e-97	COG0514	L	Replication, recombination and repair	atp-dependent dna helicase
TRINITY_DN13805_c0_g1	45351.NEMVEDRAFT_v1g15511-PA	59.2	5.4e-13	ENOG410XSU9	S	Function unknown	Fanconi anemia, complementation group I
TRINITY_DN13808_c3_g2	400682.PAC_15716216	61.8	1.6e-160	ENOG410XRGX	L	Replication, recombination and repair	atp-dependent rna helicase
TRINITY_DN13808_c4_g1	400682.PAC_15719972	35.2	2.2e-49	ENOG410XR70	S	Function unknown	Ferric-chelate reductase
TRINITY_DN13808_c4_g2	400682.PAC_15704702	50	5.2e-11	ENOG4111I8D	P	Inorganic ion transport and metabolism	Solute carrier family 31 copper transporters member
TRINITY_DN13811_c0_g1	400682.PAC_15719489	59	1.3e-20	COG5307	S	Function unknown	and Sec7 domain
TRINITY_DN13811_c0_g4	7739.JGI123852	45.7	4.3e-27	COG5243	O	Posttranslational modification, protein turnover, chaperones	zinc ion binding
TRINITY_DN13811_c0_g5	6183.Smp_141270__mRNA	26.1	8.5e-13	ENOG410ZQIE	O	Posttranslational modification, protein turnover, chaperones	apoptosis-related cysteine peptidase
TRINITY_DN13811_c0_g6	400682.PAC_15703368	56.6	3e-17	ENOG41126IN	T	Signal transduction mechanisms	protein phosphatase 1, regulatory (Inhibitor) subunit 11
TRINITY_DN13812_c0_g2	400682.PAC_15718758	38.3	2.6e-14	COG0631	T	Signal transduction mechanisms	Phosphatase
TRINITY_DN13813_c0_g1	411903.COLAER_02284	71.7	4.6e-37	ENOG410Y2V0	S	Function unknown	NA
TRINITY_DN13814_c1_g3	400682.PAC_15715895	32.7	4.4e-139	COG5543	S	Function unknown	thyroid adenoma associated
TRINITY_DN13818_c0_g1	313606.M23134_02266	54.2	1.4e-38	COG3236	S	Function unknown	Swarming motility protein YbiA
TRINITY_DN13819_c5_g2	45351.NEMVEDRAFT_v1g188090-PA	67.7	6e-95	COG0450	O	Posttranslational modification, protein turnover, chaperones	alkyl hydroperoxide reductase
TRINITY_DN13819_c5_g3	10228.TriadP56958	50	1.1e-12	ENOG4111TCC	S	Function unknown	Hemimethylated DNA-binding protein YccV like
TRINITY_DN13822_c0_g1	400682.PAC_15725607	42.7	7.4e-73	COG0515	T	Signal transduction mechanisms	Serine Threonine protein kinase
TRINITY_DN13823_c0_g1	709032.Sulku_1637	28	2.3e-17	ENOG4111XM8	S	Function unknown	Methyltransferase
TRINITY_DN13828_c1_g1	400682.PAC_15700265	62.7	1.1e-49	ENOG410YG6P	S	Function unknown	Finger protein
TRINITY_DN13828_c1_g2	400682.PAC_15716076	38	2.5e-53	ENOG410XS0N	S	Function unknown	protein binding
TRINITY_DN13828_c1_g3	400682.PAC_15727330	64.8	1.6e-259	COG4178	S	Function unknown	(ABC) transporter
TRINITY_DN13828_c1_g4	400682.PAC_15717251	53.9	3.7e-58	ENOG4112CMX	H	Coenzyme transport and metabolism	UbiA prenyltransferase family
TRINITY_DN13828_c1_g5	400682.PAC_15717251	60.5	2.6e-19	ENOG4112CMX	H	Coenzyme transport and metabolism	UbiA prenyltransferase family
TRINITY_DN13829_c0_g1	400682.PAC_15716512	40.3	6.1e-41	NA	NA	NA	NA
TRINITY_DN13830_c0_g2	591158.SSMG_05501	54.8	4.8e-10	NA	NA	NA	NA
TRINITY_DN13830_c0_g3	525367.HMPREF0556_11507	58.9	2e-18	ENOG410Y13W	S	Function unknown	PG1 protein, homology to Homo sapiens
TRINITY_DN13830_c0_g4	4113.PGSC0003DMT400097405	48.6	2.9e-07	ENOG411220X	S	Function unknown	unknow protein
TRINITY_DN13830_c0_g7	457424.BFAG_04907	68.3	1.6e-10	NA	NA	NA	NA
TRINITY_DN13832_c0_g1	448385.sce2265	46.2	1.2e-33	ENOG4111JJC	S	Function unknown	NA
TRINITY_DN13832_c0_g2	448385.sce2265	48.1	9.6e-83	ENOG4111JJC	S	Function unknown	NA
TRINITY_DN13833_c1_g1	7222.FBpp0156683	74.6	1.5e-58	ENOG410XP3K	S	Function unknown	Positively regulates the activity of the minus-end directed microtubule motor protein dynein. May enhance dynein- mediated microtubule sliding by targeting dynein to the microtubule plus end. Required for
TRINITY_DN13834_c3_g4	400682.PAC_15726649	40.5	1.7e-107	NA	NA	NA	NA
TRINITY_DN13834_c4_g2	400682.PAC_15726731	43	7.4e-16	NA	NA	NA	NA
TRINITY_DN13834_c4_g4	9913.ENSBTAP00000025537	43.8	4.7e-43	ENOG410Y515	T	Signal transduction mechanisms	associated kinase
TRINITY_DN13835_c2_g1	28377.ENSACAP00000001558	31.5	1.8e-30	COG5200	A	RNA processing and modification	S. cerevisiae
TRINITY_DN13836_c2_g2	400682.PAC_15726209	39.9	1.6e-40	COG5174	K	Transcription	general transcription factor IIE, polypeptide 2, beta 34kDa
TRINITY_DN13836_c2_g5	7029.ACYPI53102-PA	53.3	1.4e-15	COG2801	L	Replication, recombination and repair	Retrotransposon protein
TRINITY_DN13836_c3_g1	400682.PAC_15714351	44.8	1.9e-55	COG5210	S	Function unknown	TBC1 domain family member
TRINITY_DN13836_c3_g6	400682.PAC_15713434	48.8	5.6e-12	COG2801	L	Replication, recombination and repair	Retrotransposon protein
TRINITY_DN13837_c0_g1	400682.PAC_15719690	33.2	2.6e-152	COG4995	S	Function unknown	tetratricopeptide repeat domain
TRINITY_DN13839_c2_g2	400682.PAC_15721685	43.8	2.3e-58	COG0477	G	Carbohydrate transport and metabolism	major facilitator Superfamily
TRINITY_DN13840_c0_g2	45351.NEMVEDRAFT_v1g237264-PA	45.5	4.4e-19	ENOG4111W8U	S	Function unknown	Chromosome 22 open reading frame 23
TRINITY_DN13841_c0_g1	400682.PAC_15723470	47.2	2.3e-17	COG1404	O	Posttranslational modification, protein turnover, chaperones	peptidase (S8 and S53, subtilisin, kexin, sedolisin
TRINITY_DN13843_c1_g12	400682.PAC_15727748	44.4	2e-126	COG0484	O	Posttranslational modification, protein turnover, chaperones	ATP binding to DnaK triggers the release of the substrate protein, thus completing the reaction cycle. Several rounds of ATP-dependent interactions between DnaJ, DnaK and GrpE are required for fully efficient folding. Also involved, together with DnaK and GrpE, in the DNA replication of plasmids through activation of initiation proteins (By similarity)
TRINITY_DN13843_c1_g3	400682.PAC_15719633	66.4	9.3e-266	COG0449	M	Cell wall/membrane/envelope biogenesis	Catalyzes the first step in hexosamine metabolism, converting fructose-6P into glucosamine-6P using glutamine as a nitrogen source (By similarity)
TRINITY_DN13845_c0_g4	7425.NV22306-PA	27.2	2.3e-06	COG0666	S	Function unknown	Ankyrin Repeat
TRINITY_DN13846_c4_g2	28377.ENSACAP00000009123	31	1.7e-44	ENOG410XRY4	S	Function unknown	WD repeat domain 43
TRINITY_DN13846_c4_g3	45351.NEMVEDRAFT_v1g238105-PA	43.4	9.5e-23	ENOG410XRY4	S	Function unknown	WD repeat domain 43
TRINITY_DN13846_c4_g9	400682.PAC_15720141	47.6	3.2e-62	ENOG410Z3FZ	I	Lipid transport and metabolism	fatty acid elongase
TRINITY_DN13847_c0_g1	400682.PAC_15712193	32.8	5.5e-44	ENOG410YY90	S	Function unknown	NA
TRINITY_DN13847_c0_g3	400682.PAC_15712212	51.9	2e-112	COG0240	C	Energy production and conversion	glycerol-3-phosphate dehydrogenase
TRINITY_DN13848_c1_g4	400682.PAC_15717809	44.7	3.2e-39	ENOG410XS1Z	S	Function unknown	nucleobase-containing compound kinase activity
TRINITY_DN13848_c1_g5	400682.PAC_15721149	74.4	5.4e-186	COG0167	F	Nucleotide transport and metabolism	Catalyzes the conversion of dihydroorotate to orotate
TRINITY_DN13848_c1_g5	400682.PAC_15721149	74.4	5.4e-186	COG0493	E	Amino acid transport and metabolism	metal cluster binding
TRINITY_DN13848_c1_g5	400682.PAC_15721149	74.4	5.4e-186	COG1146	C	Energy production and conversion	metal cluster binding
TRINITY_DN13848_c1_g8	7739.JGI126538	74.6	1.2e-287	COG0167	F	Nucleotide transport and metabolism	Catalyzes the conversion of dihydroorotate to orotate
TRINITY_DN13848_c1_g8	7739.JGI126538	74.6	1.2e-287	COG0493	E	Amino acid transport and metabolism	metal cluster binding
TRINITY_DN13848_c1_g8	7739.JGI126538	74.6	1.2e-287	COG1146	C	Energy production and conversion	metal cluster binding
TRINITY_DN13852_c0_g1	400682.PAC_15717382	25	4.1e-29	NA	NA	NA	NA
TRINITY_DN13852_c1_g2	400682.PAC_15722248	55.5	2.4e-183	COG2072	P	Inorganic ion transport and metabolism	Monooxygenase
TRINITY_DN13854_c2_g1	7668.SPU_022948tr	32.1	7.1e-13	ENOG410XTBZ	S	Function unknown	tetratricopeptide repeat domain 39C
TRINITY_DN13854_c2_g3	7029.ACYPI008014-PA	65.3	1.8e-32	ENOG4111TU9	S	Function unknown	Brain protein 44-like
TRINITY_DN13854_c2_g4	400682.PAC_15712170	39.4	1.3e-29	ENOG41102U9	S	Function unknown	NA
TRINITY_DN13854_c2_g5	10228.TriadP38365	39.4	2.5e-17	ENOG410XTBZ	S	Function unknown	tetratricopeptide repeat domain 39C
TRINITY_DN13855_c0_g1	6945.ISCW013622-PA	56.9	2.5e-09	ENOG410XUNS	U	Intracellular trafficking, secretion, and vesicular transport	Notch ligand involved in the mediation of Notch signaling (By similarity)
TRINITY_DN13855_c1_g3	7668.SPU_004189tr	25.7	7e-06	ENOG410XQVG	S	Function unknown	DEP domain containing 5
TRINITY_DN13856_c5_g1	45351.NEMVEDRAFT_v1g200571-PA	93.9	1.5e-16	ENOG4111NV5	B	Chromatin structure and dynamics	Core component of nucleosome. Nucleosomes wrap and compact DNA into chromatin, limiting DNA accessibility to the cellular machineries which require DNA as a template. Histones thereby play a central role in transcription regulation, DNA repair, DNA replication and chromosomal stability. DNA accessibility is regulated via a complex set of post-translational modifications of histones, also called h…
TRINITY_DN13856_c5_g3	9258.ENSOANP00000000390	84.2	2.6e-16	ENOG4111NV5	B	Chromatin structure and dynamics	Core component of nucleosome. Nucleosomes wrap and compact DNA into chromatin, limiting DNA accessibility to the cellular machineries which require DNA as a template. Histones thereby play a central role in transcription regulation, DNA repair, DNA replication and chromosomal stability. DNA accessibility is regulated via a complex set of post-translational modifications of histones, also called h…
TRINITY_DN13857_c0_g1	400682.PAC_15723614	65.1	1.3e-64	ENOG410YKQK	S	Function unknown	grancalcin, EF-hand calcium binding protein
TRINITY_DN13857_c0_g2	400682.PAC_15723614	57.5	4.2e-59	ENOG410YKQK	S	Function unknown	grancalcin, EF-hand calcium binding protein
TRINITY_DN13857_c1_g1	400682.PAC_15726452	55.2	1.5e-28	ENOG410YWZI	S	Function unknown	NA
TRINITY_DN13858_c0_g1	575564.HMPREF0014_03572	71.1	1.2e-11	NA	NA	NA	NA
TRINITY_DN13858_c0_g2	641147.HMPREF9021_01090	81.8	1e-06	NA	NA	NA	NA
TRINITY_DN13859_c0_g3	400682.PAC_15712895	37	9.3e-52	ENOG4111UJN	U	Intracellular trafficking, secretion, and vesicular transport	vacuolar protein sorting 37 homolog
TRINITY_DN13860_c0_g5	400682.PAC_15716797	34.6	7.4e-17	ENOG4111FH0	I	Lipid transport and metabolism	Platelet-activating factor acetylhydrolase
TRINITY_DN13860_c1_g3	400682.PAC_15725102	48.5	5.3e-56	ENOG4111Y3H	S	Function unknown	2-aminoethanethiol
TRINITY_DN13860_c1_g4	400682.PAC_15726992	71.2	9.3e-77	ENOG410XPVM	U	Intracellular trafficking, secretion, and vesicular transport	SNF8, ESCRT-II complex subunit, homolog (S. cerevisiae)
TRINITY_DN13861_c2_g4	400682.PAC_15719433	79.3	1.1e-22	COG0515	T	Signal transduction mechanisms	Serine Threonine protein kinase
TRINITY_DN13861_c3_g1	400682.PAC_15725043	74.7	1.9e-124	ENOG410XRMJ	T	Signal transduction mechanisms	calcium-dependent protein kinase
TRINITY_DN13861_c3_g2	400682.PAC_15714551	37.3	2e-10	NA	NA	NA	NA
TRINITY_DN13863_c0_g1	28377.ENSACAP00000006168	39.5	2.1e-45	COG0515	T	Signal transduction mechanisms	Serine Threonine protein kinase
TRINITY_DN13864_c0_g2	7739.JGI85365	52.1	5.2e-134	COG2939	E	Amino acid transport and metabolism	carboxy-peptidase
TRINITY_DN13865_c0_g1	9739.ENSTTRP00000004484	54.3	2.5e-31	COG4886	S	Function unknown	leucine Rich Repeat
TRINITY_DN13867_c1_g1	400682.PAC_15723421	72.6	9.3e-48	COG1230	P	Inorganic ion transport and metabolism	cation diffusion facilitator family transporter
TRINITY_DN13869_c2_g1	748671.LCRIS_00063	52.8	5.2e-21	ENOG410XYMV	S	Function unknown	NA
TRINITY_DN13873_c0_g1	500640.CIT292_08808	57.1	4.5e-07	ENOG410XYMV	S	Function unknown	NA
TRINITY_DN13875_c0_g2	10228.TriadP57075	23.8	1.8e-22	ENOG410YVS4	S	Function unknown	NA
TRINITY_DN13876_c0_g1	566461.SSFG_03129	69.7	1e-19	NA	NA	NA	NA
TRINITY_DN13876_c0_g2	575564.HMPREF0014_03572	77.8	3.3e-13	NA	NA	NA	NA
TRINITY_DN13876_c0_g3	457429.SSDG_03957	73.3	5.3e-24	ENOG410Z6A0	S	Function unknown	NA
TRINITY_DN13877_c0_g1	400682.PAC_15712887	81.2	1.3e-75	ENOG410XNS1	S	Function unknown	MOB family member 4, phocein
TRINITY_DN13877_c1_g6	7739.JGI99083	91.9	3.4e-83	ENOG410XSXW	S	Function unknown	PARK2 co-regulated
TRINITY_DN13878_c1_g1	400682.PAC_15721518	52.9	3.3e-82	COG4870	O	Posttranslational modification, protein turnover, chaperones	cathepsin
TRINITY_DN13878_c1_g2	400682.PAC_15728570	61.2	1.1e-305	COG0474	P	Inorganic ion transport and metabolism	P-type atpase
TRINITY_DN13878_c1_g7	7897.ENSLACP00000007489	28.8	2.6e-06	ENOG4111UBS	S	Function unknown	Zona pellucida-like domain
TRINITY_DN13879_c2_g1	400682.PAC_15728492	37.9	4.2e-07	ENOG4111IRY	S	Function unknown	tetraspanin
TRINITY_DN13879_c2_g6	400682.PAC_15714366	51.3	4.7e-233	ENOG410XTHA	S	Function unknown	mannosyloligosaccharide glucosidase
TRINITY_DN13881_c1_g1	7668.SPU_003095tr	45.5	1.1e-254	COG2801	L	Replication, recombination and repair	Retrotransposon protein
TRINITY_DN13883_c3_g12	402676.XP_002171773.1	46.3	8e-08	COG0230	J	Translation, ribosomal structure and biogenesis	50s ribosomal protein l34
TRINITY_DN13883_c3_g2	7739.JGI241929	40	4.6e-21	ENOG410XPVH	K	Transcription	DNA-dependent RNA polymerase catalyzes the transcription of DNA into RNA using the four ribonucleoside triphosphates as substrates. Specific core component of RNA polymerase III which synthesizes small RNAs, such as 5S rRNA and tRNAs
TRINITY_DN13883_c3_g3	400682.PAC_15724186	48.1	7.9e-71	COG0705	S	Function unknown	rhomboid family
TRINITY_DN13884_c4_g1	400682.PAC_15720576	82.1	6e-10	ENOG410Z1VV	U	Intracellular trafficking, secretion, and vesicular transport	trafficking protein particle complex
TRINITY_DN13884_c4_g4	7739.JGI265006	69.4	5.7e-10	ENOG410Z1VV	U	Intracellular trafficking, secretion, and vesicular transport	trafficking protein particle complex
TRINITY_DN13884_c5_g2	400682.PAC_15728645	45	8.4e-42	ENOG410XQUX	S	Function unknown	guanine nucleotide binding protein (G protein), beta
TRINITY_DN13891_c3_g1	400682.PAC_15722128	61	2.5e-170	ENOG410XPJT	J	Translation, ribosomal structure and biogenesis	Component of the eukaryotic translation initiation factor 3 (eIF-3) complex, which is involved in protein synthesis and, together with other initiation factors, stimulates binding of mRNA and methionyl-tRNAi to the 40S ribosome (By similarity)
TRINITY_DN13893_c2_g1	400682.PAC_15724128	61.9	4.9e-71	COG0526	O	Posttranslational modification, protein turnover, chaperones	Thioredoxin
TRINITY_DN13893_c2_g2	400682.PAC_15723656	51.7	5.1e-138	COG0526	O	Posttranslational modification, protein turnover, chaperones	Thioredoxin
TRINITY_DN13893_c2_g3	400682.PAC_15726429	46.7	1.3e-163	ENOG410YN4N	S	Function unknown	Plant lipoxygenase may be involved in a number of diverse aspects of plant physiology including growth and development, pest resistance, and senescence or responses to wounding (By similarity)
TRINITY_DN13893_c3_g4	10228.TriadP27557	30.9	5.4e-15	COG5325	U	Intracellular trafficking, secretion, and vesicular transport	SYNtaxin
TRINITY_DN13894_c0_g1	400682.PAC_15699041	95.3	1.6e-21	COG0636	C	Energy production and conversion	F(1)F(0) ATP synthase produces ATP from ADP in the presence of a proton or sodium gradient. F-type ATPases consist of two structural domains, F(1) containing the extramembraneous catalytic core and F(0) containing the membrane proton channel, linked together by a central stalk and a peripheral stalk. During catalysis, ATP synthesis in the catalytic domain of F(1) is coupled via a rotary mechanism…
TRINITY_DN13895_c3_g3	400682.PAC_15715270	53.6	4.3e-15	ENOG411256V	S	Function unknown	NA
TRINITY_DN13896_c2_g2	400682.PAC_15718086	41.6	2.3e-21	ENOG410ZSN2	S	Function unknown	PH
TRINITY_DN13896_c2_g4	59463.ENSMLUP00000012126	55.5	6.1e-65	ENOG410XPUI	S	Function unknown	member RAS oncogene family
TRINITY_DN13897_c0_g1	7739.JGI116022	42.2	7.4e-56	COG4886	S	Function unknown	leucine Rich Repeat
TRINITY_DN13897_c0_g2	9796.ENSECAP00000010359	74	1e-38	COG0023	J	Translation, ribosomal structure and biogenesis	translation initiation factor
TRINITY_DN13898_c3_g2	7739.JGI251377	43	2.1e-24	ENOG4111XRQ	S	Function unknown	Inositol polyphosphate
TRINITY_DN13903_c0_g1	400682.PAC_15717678	59.2	2.1e-18	ENOG410XTAN	S	Function unknown	Ring finger protein
TRINITY_DN13905_c3_g1	400682.PAC_15717517	48.6	4.2e-41	COG5599	T	Signal transduction mechanisms	protein tyrosine phosphatase
TRINITY_DN13907_c0_g2	400682.PAC_15728325	35.4	2.1e-30	ENOG410XSYS	S	Function unknown	phospholipid scramblase
TRINITY_DN13909_c0_g1	411901.BACCAC_03786	75.8	3.1e-32	ENOG410Z2MS	S	Function unknown	NA
TRINITY_DN13909_c0_g2	411474.COPEUT_02397	57.3	8.5e-18	ENOG4111UA7	S	Function unknown	NA
TRINITY_DN13909_c0_g4	945681.APO_2582	74.4	4.6e-23	ENOG4111UA7	S	Function unknown	NA
TRINITY_DN13909_c0_g5	566461.SSFG_05974	75	4.1e-21	ENOG410Y2V0	S	Function unknown	NA
TRINITY_DN13910_c0_g1	400682.PAC_15719995	49.4	8.7e-118	ENOG410ZIMX	S	Function unknown	(Alpha (1,3) fucosyltransferase
TRINITY_DN13911_c0_g1	400682.PAC_15726903	44.3	1.9e-70	NA	NA	NA	NA
TRINITY_DN13911_c1_g1	7668.SPU_021656tr	54.2	1.9e-95	COG5059	Z	Cytoskeleton	Kinesin family member
TRINITY_DN13911_c1_g3	400682.PAC_15720559	44.2	7.5e-49	ENOG410XS6B	T	Signal transduction mechanisms	Rap guanine nucleotide exchange factor (GEF)
TRINITY_DN13911_c1_g5	400682.PAC_15722480	57.2	2.4e-49	ENOG4111ERT	S	Function unknown	chromosome 1 open reading frame 50
TRINITY_DN13912_c0_g1	45351.NEMVEDRAFT_v1g244319-PA	74	6.6e-34	COG1100	S	Function unknown	GTP-binding Protein
TRINITY_DN13912_c1_g1	9258.ENSOANP00000005195	76.6	3.1e-87	COG1100	S	Function unknown	GTP-binding Protein
TRINITY_DN13914_c0_g1	7159.AAEL006250-PA	24.3	3.7e-12	ENOG41110CD	S	Function unknown	BAI1-associated protein 2
TRINITY_DN13916_c0_g3	400682.PAC_15714194	33.8	5.2e-65	ENOG410ZP6N	S	Function unknown	NA
TRINITY_DN13916_c0_g6	7668.SPU_023269tr	30.2	2.6e-09	ENOG410XTYK	S	Function unknown	NA
TRINITY_DN13917_c0_g1	400682.PAC_15726479	34.6	4e-51	ENOG410YV57	S	Function unknown	GTPase activating protein (SH3 domain) binding protein
TRINITY_DN13917_c0_g3	400682.PAC_15716693	67.3	3.4e-15	ENOG4112BMH	S	Function unknown	NA
TRINITY_DN13919_c0_g1	400682.PAC_15714681	38.6	6.3e-128	ENOG410XRSF	P	Inorganic ion transport and metabolism	transporter activity
TRINITY_DN13920_c0_g1	400682.PAC_15724451	31.4	4e-21	ENOG410Y9W5	S	Function unknown	autophagy related 14
TRINITY_DN13920_c0_g2	7757.ENSPMAP00000006568	65.2	1.3e-95	ENOG410XP01	O	Posttranslational modification, protein turnover, chaperones	The proteasome is a multicatalytic proteinase complex which is characterized by its ability to cleave peptides with Arg, Phe, Tyr, Leu, and Glu adjacent to the leaving group at neutral or slightly basic pH. The proteasome has an ATP-dependent proteolytic activity (By similarity)
TRINITY_DN13921_c1_g1	700598.Niako_6823	36.2	2e-28	ENOG410XSGW	S	Function unknown	Conserved hypothetical, protein
TRINITY_DN13923_c0_g7	9913.ENSBTAP00000000526	62.2	5.6e-210	ENOG410XP87	A	RNA processing and modification	cell division cycle 40 homolog (S. cerevisiae)
TRINITY_DN13928_c1_g4	400682.PAC_15724343	41.2	3.6e-120	COG5069	Z	Cytoskeleton	Microtubule associated monoxygenase, calponin and LIM domain containing
TRINITY_DN13929_c0_g1	400682.PAC_15718570	36.5	4.7e-54	COG3621	S	Function unknown	Patatin group
TRINITY_DN13929_c1_g1	7029.ACYPI39663-PA	46.8	1.4e-21	NA	NA	NA	NA
TRINITY_DN13930_c3_g6	400682.PAC_15728300	36	1.4e-41	COG0428	P	Inorganic ion transport and metabolism	zinc transporter
TRINITY_DN13930_c4_g3	400682.PAC_15726644	73.6	6e-178	ENOG410XQKU	K	Transcription	SMAD family member
TRINITY_DN13931_c3_g3	45351.NEMVEDRAFT_v1g190891-PA	31.9	3.3e-41	ENOG410XRZD	S	Function unknown	Neuro-oncological ventral antigen
TRINITY_DN13932_c2_g1	7668.SPU_028178tr	38.2	7e-15	COG1501	G	Carbohydrate transport and metabolism	hydrolase, family 31
TRINITY_DN13933_c0_g1	400682.PAC_15726464	42.2	2.2e-06	NA	NA	NA	NA
TRINITY_DN13933_c0_g2	400682.PAC_15726464	33.2	3.7e-36	NA	NA	NA	NA
TRINITY_DN13936_c1_g1	400682.PAC_15716967	51.1	2e-71	COG0666	S	Function unknown	Ankyrin Repeat
TRINITY_DN13936_c1_g2	7739.JGI125811	47	1.9e-47	ENOG410ZWRV	S	Function unknown	NA
TRINITY_DN13936_c1_g3	400682.PAC_15724051	52.6	2.8e-68	ENOG410ZWRV	S	Function unknown	NA
TRINITY_DN13937_c0_g1	45351.NEMVEDRAFT_v1g245819-PA	60.6	2.4e-15	ENOG410XRHN	O	Posttranslational modification, protein turnover, chaperones	endosome to lysosome transport via multivesicular body sorting pathway
TRINITY_DN13937_c0_g3	10228.TriadP63201	56.1	1.2e-40	ENOG410XRHN	O	Posttranslational modification, protein turnover, chaperones	endosome to lysosome transport via multivesicular body sorting pathway
TRINITY_DN13937_c0_g4	5270.UM01669P0	59.5	9.4e-29	ENOG410XRHN	O	Posttranslational modification, protein turnover, chaperones	endosome to lysosome transport via multivesicular body sorting pathway
TRINITY_DN13938_c0_g2	400682.PAC_15721989	52.6	6e-86	COG2897	P	Inorganic ion transport and metabolism	sulfurtransferase
TRINITY_DN13941_c1_g3	400682.PAC_15716812	49.6	6e-104	ENOG410XRE1	S	Function unknown	Vacuolar fusion protein CCZ1 homolog
TRINITY_DN13941_c1_g5	400682.PAC_15727021	63.4	1.7e-54	ENOG410XRBP	S	Function unknown	methylmalonic aciduria (cobalamin deficiency) cblD type, with homocystinuria
TRINITY_DN13942_c0_g2	400682.PAC_15719615	44.5	1.6e-10	NA	NA	NA	NA
TRINITY_DN13942_c0_g3	400682.PAC_15719614	59.3	4.2e-108	ENOG410XPJ4	S	Function unknown	serine threonine kinase receptor associated protein
TRINITY_DN13942_c0_g4	61853.ENSNLEP00000018590	62.4	1.6e-130	COG0652	O	Posttranslational modification, protein turnover, chaperones	peptidyl-prolyl cis-trans isomerase activity
TRINITY_DN13944_c0_g1	7739.JGI239343	44.4	3.3e-41	ENOG410ZYS4	S	Function unknown	fibrinogen
TRINITY_DN13945_c0_g3	7176.CPIJ001180-PA	85.7	5.6e-44	COG0185	J	Translation, ribosomal structure and biogenesis	Protein S19 forms a complex with S13 that binds strongly to the 16S ribosomal RNA (By similarity)
TRINITY_DN13945_c1_g2	400682.PAC_15721357	56.5	3.7e-252	COG0008	J	Translation, ribosomal structure and biogenesis	Catalyzes the attachment of glutamate to tRNA(Glu) in a two-step reaction glutamate is first activated by ATP to form Glu-AMP and then transferred to the acceptor end of tRNA(Glu) (By similarity)
TRINITY_DN13945_c1_g2	400682.PAC_15721357	56.5	3.7e-252	COG0442	J	Translation, ribosomal structure and biogenesis	Catalyzes the attachment of proline to tRNA(Pro) in a two-step reaction proline is first activated by ATP to form Pro- AMP and then transferred to the acceptor end of tRNA(Pro). As ProRS can inadvertently accommodate and process non-cognate amino acids such as alanine and cysteine, to avoid such errors it has two additional distinct editing activities against alanine. One activity is designated a…
TRINITY_DN13945_c1_g3	37347.ENSTBEP00000007294	70	2e-215	COG0008	J	Translation, ribosomal structure and biogenesis	Catalyzes the attachment of glutamate to tRNA(Glu) in a two-step reaction glutamate is first activated by ATP to form Glu-AMP and then transferred to the acceptor end of tRNA(Glu) (By similarity)
TRINITY_DN13945_c1_g3	37347.ENSTBEP00000007294	70	2e-215	COG0442	J	Translation, ribosomal structure and biogenesis	Catalyzes the attachment of proline to tRNA(Pro) in a two-step reaction proline is first activated by ATP to form Pro- AMP and then transferred to the acceptor end of tRNA(Pro). As ProRS can inadvertently accommodate and process non-cognate amino acids such as alanine and cysteine, to avoid such errors it has two additional distinct editing activities against alanine. One activity is designated a…
TRINITY_DN13946_c0_g1	400682.PAC_15727092	52.6	6.5e-91	COG0300	S	Function unknown	Dehydrogenase
TRINITY_DN13947_c0_g1	400682.PAC_15713021	34.7	1.4e-29	NA	NA	NA	NA
TRINITY_DN13948_c2_g1	400682.PAC_15714201	50.7	1.2e-73	ENOG410XT3N	S	Function unknown	Rab guanyl-nucleotide exchange factor activity
TRINITY_DN13948_c2_g3	8364.ENSXETP00000024578	43.8	3.9e-76	ENOG410XT37	L	Replication, recombination and repair	Chromatin licensing and DNA replication factor 1
TRINITY_DN13949_c1_g3	400682.PAC_15720774	76.2	1.7e-119	COG0649	C	Energy production and conversion	NDH-1 shuttles electrons from NADH, via FMN and iron- sulfur (Fe-S) centers, to quinones in the respiratory chain. The immediate electron acceptor for the enzyme in this species is believed to be ubiquinone. Couples the redox reaction to proton translocation (for every two electrons transferred, four hydrogen ions are translocated across the cytoplasmic membrane), and thus conserves the redox ene…
TRINITY_DN13949_c1_g5	400682.PAC_15727607	26.6	8.8e-29	ENOG410XZU0	S	Function unknown	NA
TRINITY_DN13949_c1_g9	400682.PAC_15720774	69.2	1e-66	COG0649	C	Energy production and conversion	NDH-1 shuttles electrons from NADH, via FMN and iron- sulfur (Fe-S) centers, to quinones in the respiratory chain. The immediate electron acceptor for the enzyme in this species is believed to be ubiquinone. Couples the redox reaction to proton translocation (for every two electrons transferred, four hydrogen ions are translocated across the cytoplasmic membrane), and thus conserves the redox ene…
TRINITY_DN13950_c0_g1	4113.PGSC0003DMT400059380	91.4	1.3e-11	NA	NA	NA	NA
TRINITY_DN13950_c0_g15	3847.GLYMA05G18326.1	89	9.7e-33	COG0199	J	Translation, ribosomal structure and biogenesis	Binds 16S rRNA, required for the assembly of 30S particles and may also be responsible for determining the conformation of the 16S rRNA at the A site (By similarity)
TRINITY_DN13950_c0_g6	3702.ATMG00516.1	92.5	5.5e-17	COG1005	C	Energy production and conversion	NDH-1 shuttles electrons from NADH, via FMN and iron- sulfur (Fe-S) centers, to quinones in the respiratory chain. The immediate electron acceptor for the enzyme in this species is believed to be ubiquinone. Couples the redox reaction to proton translocation (for every two electrons transferred, four hydrogen ions are translocated across the cytoplasmic membrane), and thus conserves the redox ene…
TRINITY_DN13950_c0_g8	3702.ATMG01360.1	100	5.1e-49	COG0843	C	Energy production and conversion	Cytochrome C oxidase subunit I
TRINITY_DN13950_c0_g9	4113.PGSC0003DMT400089450	57.4	1.8e-08	ENOG411244F	S	Function unknown	NA
TRINITY_DN13951_c0_g1	400682.PAC_15698784	24.7	2.1e-10	NA	NA	NA	NA
TRINITY_DN13953_c0_g5	987059.RBXJA2T_08785	91.5	1.7e-50	COG0292	J	Translation, ribosomal structure and biogenesis	Binds directly to 23S ribosomal RNA and is necessary for the in vitro assembly process of the 50S ribosomal subunit. It is not involved in the protein synthesizing functions of that subunit (By similarity)
TRINITY_DN13953_c1_g2	7739.JGI88045	47.3	1.6e-41	ENOG410XPQD	S	Function unknown	transducin beta-like 3
TRINITY_DN13953_c2_g1	10141.ENSCPOP00000012790	61.5	1e-75	ENOG410XRI7	T	Signal transduction mechanisms	Phosphodiesterase
TRINITY_DN13954_c2_g1	400682.PAC_15715989	85.9	1.8e-28	ENOG410XS81	O	Posttranslational modification, protein turnover, chaperones	ubiquitin-conjugating enzyme
TRINITY_DN13954_c3_g2	7739.JGI56868	77.1	4.7e-66	COG1100	S	Function unknown	GTP-binding Protein
TRINITY_DN13955_c1_g2	8364.ENSXETP00000011515	34.2	3.9e-67	ENOG410XSFS	S	Function unknown	Fas associated factor family member 2
TRINITY_DN13957_c0_g1	4555.Si019658m	40.3	1.9e-07	ENOG41121N2	O	Posttranslational modification, protein turnover, chaperones	zinc ion binding
TRINITY_DN13960_c0_g1	449673.BACSTE_03846	62.3	8e-11	NA	NA	NA	NA
TRINITY_DN13960_c0_g2	411474.COPEUT_02601	80	1.6e-17	ENOG4111PC4	S	Function unknown	Pfam:Cw-hydrolase
TRINITY_DN13960_c0_g3	575564.HMPREF0014_03572	72.7	5.3e-07	NA	NA	NA	NA
TRINITY_DN13960_c0_g4	575564.HMPREF0014_03572	76.7	2.8e-09	NA	NA	NA	NA
TRINITY_DN13960_c0_g5	575564.HMPREF0014_03572	76.9	7.8e-10	NA	NA	NA	NA
TRINITY_DN13960_c0_g7	487797.Flav3CDRAFT_0886	76.4	5.4e-16	ENOG4111PC4	S	Function unknown	Pfam:Cw-hydrolase
TRINITY_DN13960_c0_g9	4113.PGSC0003DMT400085260	84.4	7.4e-15	ENOG410Z753	S	Function unknown	NA
TRINITY_DN13962_c2_g7	400682.PAC_15725065	60.8	1.9e-122	ENOG410XX0H	E	Amino acid transport and metabolism	carboxy-peptidase
TRINITY_DN13963_c0_g3	8083.ENSXMAP00000005213	38.8	3.9e-56	ENOG410XSJK	S	Function unknown	chromosome 5 open reading frame 44
TRINITY_DN13964_c0_g1	7955.ENSDARP00000106047	58	3.8e-149	ENOG410XP3U	S	Function unknown	Protein of unknown function (DUF1446)
TRINITY_DN13965_c1_g10	7897.ENSLACP00000002598	45	2.7e-11	ENOG410YZXB	S	Function unknown	NA
TRINITY_DN13966_c0_g2	400682.PAC_15721795	59	5.4e-136	COG1293	K	Transcription	Fibronectin-binding A domain protein
TRINITY_DN13969_c0_g1	8083.ENSXMAP00000002448	48.7	1.7e-109	COG1748	E	Amino acid transport and metabolism	saccharopine dehydrogenase
TRINITY_DN13969_c0_g2	400682.PAC_15723319	52.6	8.3e-23	ENOG4111ZK1	S	Function unknown	Chromosome 9 open reading frame 116
TRINITY_DN13969_c1_g2	7739.JGI108193	46.8	1.8e-51	ENOG4111ICZ	S	Function unknown	COMM domain containing 7
TRINITY_DN1396_c0_g1	7719.ENSCINP00000029410	44.1	8.4e-18	ENOG4112B0R	Z	Cytoskeleton	calcium binding and coiled-coil domain 2
TRINITY_DN13971_c3_g3	8364.ENSXETP00000000571	67.4	1.1e-26	ENOG4111PSF	U	Intracellular trafficking, secretion, and vesicular transport	signal recognition particle
TRINITY_DN13971_c4_g10	400682.PAC_15722132	66.7	1.9e-43	ENOG410XQVU	S	Function unknown	nudC domain containing
TRINITY_DN13971_c4_g11	7668.SPU_014766tr	59.9	2e-109	COG4870	O	Posttranslational modification, protein turnover, chaperones	cathepsin
TRINITY_DN13971_c4_g2	400682.PAC_15718744	51.5	2.4e-62	COG4043	S	Function unknown	ProFAR isomerase
TRINITY_DN13971_c4_g3	400682.PAC_15726061	48.7	1.1e-129	ENOG410XP8F	T	Signal transduction mechanisms	mitogen-activated protein kinase-activated protein kinase
TRINITY_DN13971_c4_g5	400682.PAC_15722133	51.1	3.2e-26	COG0236	I	Lipid transport and metabolism	Carrier of the growing fatty acid chain in fatty acid biosynthesis (By similarity)
TRINITY_DN13971_c4_g7	400682.PAC_15722132	40.7	2.5e-43	ENOG410XQVU	S	Function unknown	nudC domain containing
TRINITY_DN13973_c4_g2	400682.PAC_15728538	55	3.7e-255	ENOG410XPN3	U	Intracellular trafficking, secretion, and vesicular transport	nuclear pore complex protein
TRINITY_DN13973_c6_g1	400682.PAC_15712686	33	9.6e-44	NA	NA	NA	NA
TRINITY_DN13975_c0_g1	400682.PAC_15708934	35.2	5.1e-67	NA	NA	NA	NA
TRINITY_DN13976_c0_g1	400682.PAC_15716954	27.7	2.1e-08	ENOG410XR89	S	Function unknown	dopamine beta-hydroxylase (dopamine beta-monooxygenase)
TRINITY_DN13977_c0_g2	400682.PAC_15714789	50.6	2.1e-36	COG1960	I	Lipid transport and metabolism	acyl-CoA dehydrogenase
TRINITY_DN13978_c1_g1	7757.ENSPMAP00000009492	47.1	7e-06	ENOG4111T32	J	Translation, ribosomal structure and biogenesis	protein complex subunit organization
TRINITY_DN13978_c2_g2	400682.PAC_15716000	48.7	2.1e-11	ENOG410XPA6	S	Function unknown	lysophosphatidic acid acyltransferase activity
TRINITY_DN13978_c2_g3	7165.AGAP011457-PA	62.9	2.8e-77	COG0120	G	Carbohydrate transport and metabolism	phosphoriboisomerase A
TRINITY_DN13979_c1_g6	8128.ENSONIP00000026263	50.9	8.6e-83	COG2801	L	Replication, recombination and repair	Retrotransposon protein
TRINITY_DN13980_c0_g1	400682.PAC_15714562	25.5	3.7e-40	ENOG4111H3D	S	Function unknown	NACHT, LRR and PYD domains-containing protein
TRINITY_DN13982_c0_g1	6085.XP_002167647	56.2	4.1e-80	COG5024	D	Cell cycle control, cell division, chromosome partitioning	g2 mitotic-specific
TRINITY_DN13983_c2_g1	400682.PAC_15719853	36.8	2.2e-13	COG1186	J	Translation, ribosomal structure and biogenesis	Peptide chain release factor 2 directs the termination of translation in response to the peptide chain termination codons UGA and UAA (By similarity)
TRINITY_DN13983_c3_g2	400682.PAC_15727082	48.6	8.8e-81	ENOG410XT77	U	Intracellular trafficking, secretion, and vesicular transport	Intraflagellar transport 57 homolog (Chlamydomonas)
TRINITY_DN13983_c3_g5	400682.PAC_15727081	39.8	1.2e-41	ENOG41100GR	S	Function unknown	NA
TRINITY_DN13984_c0_g1	400682.PAC_15721646	59	2.8e-21	ENOG4111GI6	K	Transcription	RNA binding motif protein
TRINITY_DN13986_c0_g1	45351.NEMVEDRAFT_v1g240051-PA	37	1.4e-09	ENOG41125WY	S	Function unknown	Protein of unknown function (DUF2034)
TRINITY_DN13986_c0_g2	269797.Mbar_A0743	52.8	7.9e-26	COG0229	O	Posttranslational modification, protein turnover, chaperones	)-reductase
TRINITY_DN13986_c0_g6	400682.PAC_15713173	74.4	0	COG1241	L	Replication, recombination and repair	dna replication licensing factor
TRINITY_DN13987_c2_g1	400682.PAC_15721230	39	2.9e-114	ENOG410YCE5	U	Intracellular trafficking, secretion, and vesicular transport	Tho complex
TRINITY_DN13987_c2_g16	7668.SPU_005401tr	69.2	8.3e-14	COG0100	J	Translation, ribosomal structure and biogenesis	Located on the platform of the 30S subunit, it bridges several disparate RNA helices of the 16S rRNA. Forms part of the Shine-Dalgarno cleft in the 70S ribosome (By similarity)
TRINITY_DN13987_c2_g3	400682.PAC_15727621	65.4	2.3e-150	COG1171	E	Amino acid transport and metabolism	Threonine dehydratase
TRINITY_DN13987_c2_g9	7668.SPU_005401tr	54.2	2.4e-06	COG0100	J	Translation, ribosomal structure and biogenesis	Located on the platform of the 30S subunit, it bridges several disparate RNA helices of the 16S rRNA. Forms part of the Shine-Dalgarno cleft in the 70S ribosome (By similarity)
TRINITY_DN13990_c1_g1	400682.PAC_15724610	46.7	9.2e-34	ENOG410XQZ1	O	Posttranslational modification, protein turnover, chaperones	Ligand for members of the frizzled family of seven transmembrane receptors (By similarity)
TRINITY_DN13990_c3_g3	400682.PAC_15725625	71.8	2.1e-95	COG0204	I	Lipid transport and metabolism	Acyltransferase
TRINITY_DN13992_c0_g3	7897.ENSLACP00000020361	83.4	5.7e-224	COG0541	U	Intracellular trafficking, secretion, and vesicular transport	Involved in targeting and insertion of nascent membrane proteins into the cytoplasmic membrane. Binds to the hydrophobic signal sequence of the ribosome-nascent chain (RNC) as it emerges from the ribosomes. The SRP-RNC complex is then targeted to the cytoplasmic membrane where it interacts with the SRP receptor FtsY
TRINITY_DN13994_c4_g1	400682.PAC_15714986	58.7	3.3e-26	COG2214	O	Posttranslational modification, protein turnover, chaperones	DNAj domain protein
TRINITY_DN13994_c4_g2	7739.JGI88239	37.9	9.8e-47	ENOG410Y76E	O	Posttranslational modification, protein turnover, chaperones	Subtilase family
TRINITY_DN13994_c6_g3	59729.ENSTGUP00000002179	29.6	5.4e-55	ENOG410XRPX	S	Function unknown	peptide cross-linking via chondroitin 4-sulfate glycosaminoglycan
TRINITY_DN13994_c6_g4	10116.ENSRNOP00000052803	35.2	1.7e-13	ENOG410XTD2	S	Function unknown	heparan sulfate proteoglycan
TRINITY_DN13996_c1_g4	400682.PAC_15721129	33.6	1.1e-87	COG5069	Z	Cytoskeleton	Microtubule associated monoxygenase, calponin and LIM domain containing
TRINITY_DN13997_c0_g1	31033.ENSTRUP00000034431	75.6	1.2e-51	COG5190	K	Transcription	CTD (Carboxy-terminal domain, RNA polymerase II, polypeptide A)
TRINITY_DN13999_c1_g1	132908.ENSPVAP00000006487	48	5.3e-34	ENOG410YZAI	S	Function unknown	PHD and ring finger domains 1
TRINITY_DN13999_c1_g2	45351.NEMVEDRAFT_v1g96894-PA	32.4	3.1e-24	ENOG4111IS4	S	Function unknown	SRI (Set2 Rpb1 interacting) domain
TRINITY_DN13999_c2_g1	400682.PAC_15707845	47.6	5.2e-39	ENOG410XQWH	Z	Cytoskeleton	Parvin, alpha
TRINITY_DN13999_c2_g4	400682.PAC_15717284	34.3	8.7e-48	ENOG410XRXC	S	Function unknown	ELMO CED-12 domain containing
TRINITY_DN14000_c0_g1	391597.LMED105_11545	55.3	2.8e-69	ENOG410XPTP	C	Energy production and conversion	Dehydrogenase
TRINITY_DN14002_c1_g1	395019.BMULJ_05092	82.9	4e-24	NA	NA	NA	NA
TRINITY_DN14002_c1_g2	272624.lpg0305	40.9	7.9e-12	NA	NA	NA	NA
TRINITY_DN14002_c1_g3	314607.KB13_443	74.4	2.8e-07	NA	NA	NA	NA
TRINITY_DN14003_c0_g1	400682.PAC_15713121	49.9	1.1e-106	ENOG410XRE3	S	Function unknown	guanyl-nucleotide exchange factor activity
TRINITY_DN14003_c0_g10	400682.PAC_15713121	50.7	3.5e-28	ENOG410XRE3	S	Function unknown	guanyl-nucleotide exchange factor activity
TRINITY_DN14003_c0_g12	400682.PAC_15716085	75.5	5.1e-12	COG4642	S	Function unknown	whole genome shotgun sequence
TRINITY_DN14003_c0_g5	7739.JGI234721	46.5	1.4e-28	ENOG410ZNA7	S	Function unknown	enkurin, TRPC channel interacting protein
TRINITY_DN14007_c0_g1	487797.Flav3CDRAFT_0886	66.7	2.2e-25	ENOG4111PC4	S	Function unknown	Pfam:Cw-hydrolase
TRINITY_DN14008_c0_g3	400682.PAC_15726774	46.5	8.3e-32	COG0534	V	Defense mechanisms	Mate efflux family protein
TRINITY_DN14008_c0_g5	7739.JGI218949	48	9.5e-230	COG0404	E	Amino acid transport and metabolism	The glycine cleavage system catalyzes the degradation of glycine (By similarity)
TRINITY_DN14008_c0_g6	121225.PHUM243220-PA	40.9	1.3e-57	COG0494	L	Replication, recombination and repair	Nudix hydrolase
TRINITY_DN14008_c0_g7	400682.PAC_15719003	34.1	1.6e-96	ENOG410YVNZ	U	Intracellular trafficking, secretion, and vesicular transport	translocase of outer mitochondrial membrane 70 homolog A (S. cerevisiae)
TRINITY_DN14009_c2_g1	400682.PAC_15716242	73.7	4.1e-46	ENOG410XQ54	S	Function unknown	F-box and leucine-rich repeat protein
TRINITY_DN14009_c2_g2	400682.PAC_15720129	57.8	2.6e-146	COG0260	E	Amino acid transport and metabolism	Presumably involved in the processing and regular turnover of intracellular proteins. Catalyzes the removal of unsubstituted N-terminal amino acids from various peptides (By similarity)
TRINITY_DN14010_c1_g1	400682.PAC_15717828	37.4	5.3e-94	COG1112	L	Replication, recombination and repair	Helicase
TRINITY_DN14010_c2_g1	8128.ENSONIP00000016648	47	1e-66	COG5242	K	Transcription	Transcription factor
TRINITY_DN14010_c2_g3	7668.SPU_026768tr	45.2	1.6e-23	ENOG4111UE3	S	Function unknown	EF-hand calcium binding domain 10
TRINITY_DN14010_c2_g4	6085.XP_002156890	51	3.2e-120	ENOG410XP06	S	Function unknown	Phosphatidylinositol 4-kinase type
TRINITY_DN14011_c0_g1	484018.BACPLE_00421	62.1	1.2e-23	ENOG4111P6Q	S	Function unknown	NA
TRINITY_DN14011_c0_g2	471874.PROSTU_00109	66.1	1.2e-12	ENOG4111P6Q	S	Function unknown	NA
TRINITY_DN14011_c0_g3	471874.PROSTU_00109	67.1	8e-19	ENOG4111P6Q	S	Function unknown	NA
TRINITY_DN14011_c0_g4	484018.BACPLE_00421	53.6	4.9e-06	ENOG4111P6Q	S	Function unknown	NA
TRINITY_DN14012_c1_g2	400682.PAC_15721802	32.7	5e-95	ENOG410XSBP	S	Function unknown	family with sequence similarity 179, member
TRINITY_DN14012_c1_g4	10116.ENSRNOP00000000632	42	1.1e-33	COG2340	S	Function unknown	Scp-like extracellular
TRINITY_DN14012_c1_g7	400682.PAC_15721802	38.1	7.6e-32	ENOG410XSBP	S	Function unknown	family with sequence similarity 179, member
TRINITY_DN14013_c0_g1	400682.PAC_15714387	36.3	3.4e-43	NA	NA	NA	NA
TRINITY_DN14013_c1_g1	400682.PAC_15712453	51.9	2.1e-52	COG2110	S	Function unknown	appr-1-p processing domain protein
TRINITY_DN14013_c1_g1	400682.PAC_15712453	51.9	2.1e-52	COG5262	B	Chromatin structure and dynamics	histone h2a
TRINITY_DN14014_c1_g1	400682.PAC_15723334	35.5	1.6e-10	ENOG4111J4N	U	Intracellular trafficking, secretion, and vesicular transport	synaptoporin
TRINITY_DN14015_c0_g1	8090.ENSORLP00000008474	26.8	1.2e-13	ENOG410XSD2	S	Function unknown	G- protein-coupled receptor
TRINITY_DN14016_c2_g3	7739.JGI288463	59.3	1e-99	ENOG410XS86	S	Function unknown	Solute carrier family 25
TRINITY_DN14017_c1_g3	9483.ENSCJAP00000005729	54	8.7e-239	ENOG410XR7D	S	Function unknown	NatA auxiliary subunit
TRINITY_DN14017_c1_g4	400682.PAC_15725062	54.2	8.4e-57	ENOG41124VU	G	Carbohydrate transport and metabolism	lysozyme
TRINITY_DN14018_c0_g1	314264.ROS217_14991	73.5	1.2e-07	ENOG410Y4Y0	S	Function unknown	NA
TRINITY_DN14018_c0_g2	759362.KVU_1965	51.5	2e-09	ENOG410Y4Y0	S	Function unknown	NA
TRINITY_DN14018_c0_g3	634499.EpC_05490	64.3	1.9e-11	ENOG410ZTN7	S	Function unknown	NA
TRINITY_DN14018_c0_g4	882102.VAA_03725	70.7	2.7e-12	ENOG410Y8F8	S	Function unknown	NA
TRINITY_DN14018_c0_g5	137722.AZL_020720	60.3	5.9e-17	NA	NA	NA	NA
TRINITY_DN14018_c0_g6	759362.KVU_1965	70.3	1.4e-07	ENOG410Y4Y0	S	Function unknown	NA
TRINITY_DN14019_c4_g1	400682.PAC_15712039	81.3	5.1e-230	ENOG410XNX8	S	Function unknown	kelch-like
TRINITY_DN14020_c0_g2	45351.NEMVEDRAFT_v1g243989-PA	44.7	1.6e-79	ENOG410XSCN	S	Function unknown	tektin 2 (testicular)
TRINITY_DN14020_c1_g2	400682.PAC_15726654	34.5	2.7e-137	ENOG410XSTY	S	Function unknown	Latent transforming growth factor beta binding protein 2
TRINITY_DN14020_c1_g4	8364.ENSXETP00000024989	30.6	4e-61	COG2124	Q	Secondary metabolites biosynthesis, transport and catabolism	Cytochrome p450
TRINITY_DN14022_c0_g1	400682.PAC_15717374	40.4	8.4e-54	COG0458	F	Nucleotide transport and metabolism	carbamoyl-phosphate synthetase ammonia chain
TRINITY_DN14023_c3_g1	400682.PAC_15717596	62.3	4.3e-215	ENOG410Z7D9	S	Function unknown	BTB POZ domain containing
TRINITY_DN14028_c0_g1	7739.JGI88655	65.7	6e-61	ENOG4111H1K	S	Function unknown	chromosome 7 open reading frame 41
TRINITY_DN14028_c1_g1	400682.PAC_15712506	60.9	9.9e-142	COG5059	Z	Cytoskeleton	Kinesin family member
TRINITY_DN14028_c1_g11	400682.PAC_15712506	30.9	8.8e-33	COG5059	Z	Cytoskeleton	Kinesin family member
TRINITY_DN14028_c1_g6	561007.MAB_0819	35.3	6e-08	COG0388	S	Function unknown	nitrilase cyanide hydratase and apolipoprotein n-acyltransferase
TRINITY_DN1402_c0_g1	7739.JGI286245	36.2	5.8e-40	COG1208	M	Cell wall/membrane/envelope biogenesis	nucleotidyl transferase
TRINITY_DN14030_c4_g1	400682.PAC_15722664	58.4	1.8e-53	ENOG410XP3K	S	Function unknown	Positively regulates the activity of the minus-end directed microtubule motor protein dynein. May enhance dynein- mediated microtubule sliding by targeting dynein to the microtubule plus end. Required for
TRINITY_DN14030_c6_g3	8364.ENSXETP00000059524	70	2.3e-48	ENOG410XP3K	S	Function unknown	Positively regulates the activity of the minus-end directed microtubule motor protein dynein. May enhance dynein- mediated microtubule sliding by targeting dynein to the microtubule plus end. Required for
TRINITY_DN14031_c0_g1	400682.PAC_15718918	46.2	7.6e-60	COG1100	S	Function unknown	GTP-binding Protein
TRINITY_DN14031_c0_g1	400682.PAC_15718918	46.2	7.6e-60	COG4886	S	Function unknown	leucine Rich Repeat
TRINITY_DN14031_c0_g3	400682.PAC_15718918	39.2	7.2e-219	COG1100	S	Function unknown	GTP-binding Protein
TRINITY_DN14031_c0_g3	400682.PAC_15718918	39.2	7.2e-219	COG4886	S	Function unknown	leucine Rich Repeat
TRINITY_DN14032_c0_g1	400682.PAC_15727223	57.2	5.1e-26	COG1241	L	Replication, recombination and repair	dna replication licensing factor
TRINITY_DN14032_c0_g5	45351.NEMVEDRAFT_v1g191344-PA	72.3	4.6e-72	COG1241	L	Replication, recombination and repair	dna replication licensing factor
TRINITY_DN14034_c0_g2	400682.PAC_15725753	47.8	1.3e-20	ENOG410XSWW	S	Function unknown	Chromosome 10 open reading frame 137
TRINITY_DN14034_c0_g3	7159.AAEL011095-PA	43.5	2.1e-118	ENOG410XPRX	S	Function unknown	UDP-N-acetyl-alpha-D-galactosamine polypeptide
TRINITY_DN14036_c3_g1	400682.PAC_15718754	54.3	4.1e-147	ENOG410XPW1	U	Intracellular trafficking, secretion, and vesicular transport	Signal-recognition-particle assembly has a crucial role in targeting secretory proteins to the rough endoplasmic reticulum membrane (By similarity)
TRINITY_DN14040_c0_g1	400682.PAC_15724167	61.1	4e-70	COG2939	E	Amino acid transport and metabolism	carboxy-peptidase
TRINITY_DN14045_c0_g1	3218.PP1S183_28V6.1	38	1.4e-97	COG0277	C	Energy production and conversion	FAD linked oxidase domain protein
TRINITY_DN14045_c1_g11	3218.PP1S183_28V6.1	42.9	9.3e-37	COG0277	C	Energy production and conversion	FAD linked oxidase domain protein
TRINITY_DN14045_c1_g2	39946.BGIOSGA019199-PA	26.6	5e-24	ENOG410XR0A	S	Function unknown	capping protein (actin filament) gelsolin-like
TRINITY_DN14045_c1_g4	3218.PP1S183_28V6.1	37.8	3e-51	COG0277	C	Energy production and conversion	FAD linked oxidase domain protein
TRINITY_DN14046_c4_g5	400682.PAC_15712038	38	2.9e-288	COG0539	J	Translation, ribosomal structure and biogenesis	thus facilitating recognition of the initiation point. It is needed to translate mRNA with a short Shine-Dalgarno (SD) purine-rich sequence (By similarity)
TRINITY_DN14048_c0_g1	45351.NEMVEDRAFT_v1g238337-PA	30.1	3.2e-13	ENOG410Y9WN	S	Function unknown	Spermatogenesis associated, serine-rich
TRINITY_DN14051_c1_g1	400682.PAC_15726771	31	1.3e-44	ENOG410YMJD	K	Transcription	Regulator of G-protein signaling
TRINITY_DN14051_c1_g2	7739.JGI226590	38.5	3.4e-14	ENOG4111I8D	P	Inorganic ion transport and metabolism	Solute carrier family 31 copper transporters member
TRINITY_DN14051_c2_g3	400682.PAC_15716824	65.6	2.9e-55	ENOG4111HN3	U	Intracellular trafficking, secretion, and vesicular transport	Charged multivesicular body protein
TRINITY_DN14052_c0_g4	7739.JGI278571	55.3	1.2e-60	COG0125	F	Nucleotide transport and metabolism	Phosphorylation of dTMP to form dTDP in both de novo and salvage pathways of dTTP synthesis (By similarity)
TRINITY_DN14054_c0_g4	431895.XP_001747681.1	46.1	1.1e-54	COG2234	S	Function unknown	peptidase m28
TRINITY_DN14054_c0_g7	400682.PAC_15708785	54.2	2.3e-19	ENOG41127NZ	S	Function unknown	NA
TRINITY_DN14055_c2_g3	7668.SPU_025006tr	50	5.1e-20	ENOG410Y65V	S	Function unknown	Retrotransposon protein
TRINITY_DN14055_c3_g1	400682.PAC_15712672	36.4	7e-29	ENOG4111HQA	S	Function unknown	androgen-dependent TFPI-regulating protein
TRINITY_DN14055_c3_g3	45351.NEMVEDRAFT_v1g22365-PA	51.3	4.7e-56	COG5273	S	Function unknown	Zinc finger, DHHC-type containing
TRINITY_DN14057_c1_g1	400682.PAC_15727803	74.4	2.7e-78	ENOG4111I3F	Q	Secondary metabolites biosynthesis, transport and catabolism	isochorismatase
TRINITY_DN14057_c1_g2	400682.PAC_15727804	41.2	1.8e-58	ENOG410XQFQ	S	Function unknown	Mesoderm development candidate 1
TRINITY_DN14057_c2_g1	9986.ENSOCUP00000004897	39.8	8.3e-58	ENOG410Y28B	O	Posttranslational modification, protein turnover, chaperones	Tubulin folding cofactor C
TRINITY_DN14057_c2_g4	400682.PAC_15709084	43	1e-12	ENOG410XPRI	S	Function unknown	-Drosophila
TRINITY_DN14057_c2_g5	400682.PAC_15722592	52	1.5e-17	ENOG410Z1EJ	S	Function unknown	bZIP Maf transcription factor
TRINITY_DN14058_c0_g2	45351.NEMVEDRAFT_v1g180767-PA	84.8	1.2e-192	COG1287	S	Function unknown	oligosaccharyl transferase STT3 subunit
TRINITY_DN14060_c1_g1	400682.PAC_15715681	49.6	7.6e-60	COG5022	Z	Cytoskeleton	myosin heavy chain
TRINITY_DN14060_c2_g1	400682.PAC_15708177	31.7	8e-12	ENOG4111T3W	K	Transcription	CREB ATF bZIP transcription factor
TRINITY_DN14060_c2_g2	400682.PAC_15708194	52.4	1.7e-42	COG1804	C	Energy production and conversion	l-carnitine dehydratase bile acid-inducible protein F
TRINITY_DN14060_c2_g3	400682.PAC_15726753	54	3.3e-86	COG5018	S	Function unknown	ERI1 exoribonuclease family member
TRINITY_DN14060_c2_g4	45351.NEMVEDRAFT_v1g116127-PA	63.2	6.8e-58	COG1804	C	Energy production and conversion	l-carnitine dehydratase bile acid-inducible protein F
TRINITY_DN14060_c2_g8	400682.PAC_15726753	55.9	7.1e-30	COG5018	S	Function unknown	ERI1 exoribonuclease family member
TRINITY_DN14061_c0_g1	400682.PAC_15726682	23.6	9.5e-23	NA	NA	NA	NA
TRINITY_DN14062_c0_g12	7668.SPU_003371tr	42	5.4e-44	COG2801	L	Replication, recombination and repair	Retrotransposon protein
TRINITY_DN14062_c0_g14	7668.SPU_001414tr	62.7	1.9e-74	COG2801	L	Replication, recombination and repair	Retrotransposon protein
TRINITY_DN14062_c0_g2	7668.SPU_013848tr	60.5	2.1e-112	COG2801	L	Replication, recombination and repair	Retrotransposon protein
TRINITY_DN14062_c0_g6	7668.SPU_013845tr	63.2	2.9e-38	COG2801	L	Replication, recombination and repair	Retrotransposon protein
TRINITY_DN14062_c0_g7	7668.SPU_008423tr	45.8	1.1e-13	COG2801	L	Replication, recombination and repair	Retrotransposon protein
TRINITY_DN14062_c0_g8	7668.SPU_001414tr	42.6	9.1e-46	COG2801	L	Replication, recombination and repair	Retrotransposon protein
TRINITY_DN14062_c0_g9	6334.EFV50733	71.4	3.4e-31	COG2801	L	Replication, recombination and repair	Retrotransposon protein
TRINITY_DN14063_c2_g11	400682.PAC_15716021	50.7	3.3e-64	ENOG411001P	O	Posttranslational modification, protein turnover, chaperones	Collagen type II, alpha 1
TRINITY_DN14063_c2_g4	400682.PAC_15725644	37.6	8.2e-74	ENOG410XSH5	S	Function unknown	KAT8 regulatory NSL complex subunit 3
TRINITY_DN14063_c2_g6	13735.ENSPSIP00000012146	52.9	5.5e-120	ENOG410XPF1	G	Carbohydrate transport and metabolism	alpha-galactosidase
TRINITY_DN14064_c0_g1	400682.PAC_15722398	26.1	5.9e-26	NA	NA	NA	NA
TRINITY_DN14064_c0_g4	400682.PAC_15722398	29.4	9.6e-33	NA	NA	NA	NA
TRINITY_DN14065_c1_g1	400682.PAC_15721840	74.2	1.5e-131	COG5059	Z	Cytoskeleton	Kinesin family member
TRINITY_DN14065_c2_g8	31033.ENSTRUP00000037000	49.4	2.8e-51	COG5198	S	Function unknown	Protein tyrosine phosphatase-like
TRINITY_DN14066_c1_g7	44689.DDB0216405	33.7	6.4e-62	ENOG410YE3S	S	Function unknown	Eukaryotic elongation factor-2 kinase
TRINITY_DN14067_c0_g1	400682.PAC_15716708	44.2	6e-73	ENOG41129NE	S	Function unknown	NA
TRINITY_DN14067_c0_g3	400682.PAC_15704675	36	3e-12	COG2801	L	Replication, recombination and repair	Retrotransposon protein
TRINITY_DN14067_c0_g5	400682.PAC_15704675	53.5	1.2e-08	COG2801	L	Replication, recombination and repair	Retrotransposon protein
TRINITY_DN14069_c0_g1	400682.PAC_15714512	40.7	1.1e-17	COG0666	S	Function unknown	Ankyrin Repeat
TRINITY_DN14071_c0_g1	400682.PAC_15719076	29.8	7.3e-31	NA	NA	NA	NA
TRINITY_DN14071_c0_g3	400682.PAC_15722604	58.3	1.7e-171	ENOG410XPTW	S	Function unknown	microtubule binding
TRINITY_DN14071_c0_g5	400682.PAC_15722604	57.5	7.1e-39	ENOG410XPTW	S	Function unknown	microtubule binding
TRINITY_DN14073_c4_g1	7668.SPU_028159tr	40.7	1.5e-22	ENOG4110362	O	Posttranslational modification, protein turnover, chaperones	parallel actin filament bundle assembly
TRINITY_DN14074_c1_g2	9258.ENSOANP00000016379	27.2	4.1e-06	ENOG410ZBX3	S	Function unknown	leucine Rich Repeat
TRINITY_DN14075_c0_g1	400682.PAC_15727265	74.4	4.3e-147	ENOG410XPST	S	Function unknown	Phosphate carrier protein
TRINITY_DN14076_c3_g1	400682.PAC_15712512	53.4	8.9e-80	COG4287	S	Function unknown	PhoPQ-activated pathogenicity-related protein
TRINITY_DN14076_c3_g5	400682.PAC_15702121	54	1.4e-35	ENOG410XPUI	S	Function unknown	member RAS oncogene family
TRINITY_DN14076_c3_g6	400682.PAC_15707873	41.2	2.2e-25	NA	NA	NA	NA
TRINITY_DN14077_c0_g1	7739.JGI220284	56.9	7e-91	ENOG4110RH0	O	Posttranslational modification, protein turnover, chaperones	Ceroid-lipofuscinosis, neuronal 5
TRINITY_DN14077_c0_g2	7668.SPU_009841tr	57.7	1.6e-100	COG0462	F	Nucleotide transport and metabolism	Phosphoribosyl pyrophosphate synthase
TRINITY_DN14077_c0_g7	31033.ENSTRUP00000026557	57.8	3.3e-07	ENOG4110RH0	O	Posttranslational modification, protein turnover, chaperones	Ceroid-lipofuscinosis, neuronal 5
TRINITY_DN14078_c1_g2	7897.ENSLACP00000012148	40	3e-136	COG2940	S	Function unknown	Histone-lysine N-methyltransferase
TRINITY_DN14080_c0_g2	500633.CLOHIR_02084	48.4	6.1e-12	ENOG410YXGP	S	Function unknown	NA
TRINITY_DN14080_c0_g4	500633.CLOHIR_02084	54.9	1.6e-07	ENOG410YXGP	S	Function unknown	NA
TRINITY_DN14081_c2_g3	400682.PAC_15712948	48.3	2.5e-06	ENOG4111NI3	T	Signal transduction mechanisms	Protein phosphatase 1, regulatory (Inhibitor) subunit 14B
TRINITY_DN14082_c0_g1	7739.JGI245517	62.7	1.9e-114	COG0464	O	Posttranslational modification, protein turnover, chaperones	Aaa atpase
TRINITY_DN14082_c0_g2	400682.PAC_15727187	93.3	2.4e-72	COG0100	J	Translation, ribosomal structure and biogenesis	Located on the platform of the 30S subunit, it bridges several disparate RNA helices of the 16S rRNA. Forms part of the Shine-Dalgarno cleft in the 70S ribosome (By similarity)
TRINITY_DN14082_c0_g3	400682.PAC_15713329	64.5	1.4e-122	COG0464	O	Posttranslational modification, protein turnover, chaperones	Aaa atpase
TRINITY_DN14082_c1_g3	400682.PAC_15723505	61.8	1e-28	COG0666	S	Function unknown	Ankyrin Repeat
TRINITY_DN14084_c0_g1	400682.PAC_15717719	62.5	1.2e-140	COG1028	S	Function unknown	Dehydrogenase reductase
TRINITY_DN14085_c0_g3	9823.ENSSSCP00000022174	46.9	1.1e-18	ENOG41121QW	S	Function unknown	Cystatin B (Stefin B)
TRINITY_DN14088_c1_g1	400682.PAC_15720826	29	1.1e-10	COG0666	S	Function unknown	Ankyrin Repeat
TRINITY_DN14089_c0_g1	224914.BAWG_3064	64.6	7.9e-17	ENOG41129MV	S	Function unknown	NA
TRINITY_DN14089_c0_g2	500640.CIT292_08808	59.7	1.1e-13	ENOG410XYMV	S	Function unknown	NA
TRINITY_DN14089_c1_g1	457425.SSHG_04800	49.6	2.5e-20	ENOG410Z56V	S	Function unknown	NA
TRINITY_DN14091_c0_g9	5762.XP_002671291.1	45.9	6.5e-11	ENOG410XPZU	S	Function unknown	epithelial splicing regulatory protein
TRINITY_DN14092_c2_g1	7668.SPU_003990tr	45.5	1.3e-99	ENOG410XPYF	S	Function unknown	mannosyl (alpha-1,6-)-glycoprotein beta-1,2-N-acetylglucosaminyltransferase
TRINITY_DN14092_c2_g2	400682.PAC_15727697	74.3	1.4e-71	COG5665	K	Transcription	CCR4-NOT transcription complex, subunit 3
TRINITY_DN14094_c1_g11	400682.PAC_15717605	47.2	1.7e-132	COG5253	T	Signal transduction mechanisms	phosphatidylinositol-4-phosphate 5-kinase
TRINITY_DN14095_c1_g1	411463.EUBVEN_00788	53.4	8.7e-08	ENOG410Y13W	S	Function unknown	PG1 protein, homology to Homo sapiens
TRINITY_DN14097_c0_g1	400682.PAC_15709357	51.5	2.5e-17	NA	NA	NA	NA
TRINITY_DN14097_c0_g2	400682.PAC_15700393	54.4	1e-09	NA	NA	NA	NA
TRINITY_DN14097_c0_g3	9305.ENSSHAP00000010684	73.8	3.3e-83	COG1241	L	Replication, recombination and repair	dna replication licensing factor
TRINITY_DN14098_c0_g1	400682.PAC_15722719	54.4	7.5e-59	COG0688	I	Lipid transport and metabolism	Phosphatidylserine decarboxylase
TRINITY_DN14098_c0_g2	400682.PAC_15713540	48.3	1.5e-82	ENOG4110AJV	T	Signal transduction mechanisms	Rho guanine nucleotide exchange factor (GEF) 39
TRINITY_DN14098_c0_g4	400682.PAC_15722682	43.1	2.6e-10	ENOG410XZCK	S	Function unknown	NA
TRINITY_DN14099_c1_g2	43151.ADAR009463-PA	42.1	4.4e-40	COG2890	J	Translation, ribosomal structure and biogenesis	Methylates the class 1 translation termination release factors RF1 PrfA and RF2 PrfB on the glutamine residue of the universally conserved GGQ motif (By similarity)
TRINITY_DN14099_c2_g1	7091.BGIBMGA000408-TA	51	5.1e-12	ENOG410XNRX	T	Signal transduction mechanisms	calcium calmodulin-dependent protein kinase
TRINITY_DN14101_c0_g2	400682.PAC_15698784	23.9	8.1e-13	NA	NA	NA	NA
TRINITY_DN14102_c5_g1	400682.PAC_15724976	93	2.8e-32	ENOG410XP1U	S	Function unknown	small GTPase mediated signal transduction
TRINITY_DN14102_c5_g2	400682.PAC_15711432	32.7	1.3e-41	ENOG410Y7NQ	S	Function unknown	erythrocyte membrane protein band 4.1-like
TRINITY_DN14102_c5_g3	400682.PAC_15720775	40.9	2.3e-53	ENOG410ZZ9A	S	Function unknown	WD domain, G-beta repeat
TRINITY_DN14102_c5_g5	45351.NEMVEDRAFT_v1g243990-PA	46.9	1.9e-62	COG0328	L	Replication, recombination and repair	ribonuclease H activity
TRINITY_DN14102_c5_g9	400682.PAC_15720779	33.8	7.1e-43	NA	NA	NA	NA
TRINITY_DN14103_c0_g2	400682.PAC_15708080	36.7	3.3e-28	NA	NA	NA	NA
TRINITY_DN14104_c4_g1	400682.PAC_15708647	30.4	9.6e-09	ENOG410XPVX	T	Signal transduction mechanisms	receptor tyrosine kinase
TRINITY_DN14104_c5_g2	400682.PAC_15715046	48	1.3e-113	ENOG410XPAD	O	Posttranslational modification, protein turnover, chaperones	sorting nexin family member 27
TRINITY_DN14105_c4_g4	13735.ENSPSIP00000006022	64.3	1.2e-45	ENOG410ZR2P	S	Function unknown	Zinc finger protein-like 1
TRINITY_DN14106_c0_g1	400682.PAC_15720816	57.7	3.9e-71	COG5414	K	Transcription	RNA polymerase II, TATA box binding protein (TBP)-associated factor
TRINITY_DN14108_c0_g3	400682.PAC_15721123	75.3	1.1e-167	COG0515	T	Signal transduction mechanisms	Serine Threonine protein kinase
TRINITY_DN14109_c2_g3	400682.PAC_15725010	49.1	5e-204	COG0639	T	Signal transduction mechanisms	serine threonine-protein phosphatase
TRINITY_DN14110_c0_g1	400682.PAC_15704638	43.2	1.2e-22	ENOG410YF3T	S	Function unknown	Chromosome 11 open reading frame 30
TRINITY_DN14111_c3_g1	5786.XP_003283792.1	41.9	1.8e-30	ENOG410YGDU	S	Function unknown	phytanoyl-CoA dioxygenase
TRINITY_DN14111_c3_g2	5786.XP_003283792.1	39.5	1.7e-72	ENOG410YGDU	S	Function unknown	phytanoyl-CoA dioxygenase
TRINITY_DN14114_c3_g3	10090.ENSMUSP00000035166	61.5	2.6e-90	COG0476	H	Coenzyme transport and metabolism	small protein activating enzyme activity
TRINITY_DN14114_c4_g1	400682.PAC_15723959	40.8	1.4e-20	ENOG410ZQEQ	S	Function unknown	Pleckstrin homology domain containing, family A (Phosphoinositide binding specific) member
TRINITY_DN14116_c0_g1	7897.ENSLACP00000019437	81.4	3.8e-25	COG1219	O	Posttranslational modification, protein turnover, chaperones	ATP-dependent specificity component of the Clp protease. It directs the protease to specific substrates. Can perform chaperone functions in the absence of ClpP (By similarity)
TRINITY_DN14116_c0_g3	400682.PAC_15719103	40.8	1e-52	COG0564	J	Translation, ribosomal structure and biogenesis	pseudouridine synthase activity
TRINITY_DN14118_c0_g1	400682.PAC_15727835	36.1	1.7e-42	NA	NA	NA	NA
TRINITY_DN14119_c0_g1	7668.SPU_002511tr	26.4	2.9e-29	COG5095	K	Transcription	Transcription initiation factor TFIID
TRINITY_DN14119_c0_g2	7739.JGI115875	61.2	1.7e-125	COG1304	C	Energy production and conversion	Catalyzes the 1,3-allylic rearrangement of the homoallylic substrate isopentenyl (IPP) to its allylic isomer, dimethylallyl diphosphate (DMAPP) (By similarity)
TRINITY_DN14119_c0_g3	400682.PAC_15716881	69.8	5.7e-22	NA	NA	NA	NA
TRINITY_DN14120_c3_g2	7176.CPIJ012146-PA	55.4	4.6e-90	COG0462	F	Nucleotide transport and metabolism	Phosphoribosyl pyrophosphate synthase
TRINITY_DN14120_c3_g6	400682.PAC_15717306	59.3	8.4e-12	COG0666	S	Function unknown	Ankyrin Repeat
TRINITY_DN14120_c3_g6	400682.PAC_15717306	59.3	8.4e-12	COG5021	O	Posttranslational modification, protein turnover, chaperones	ubiquitin protein ligase
TRINITY_DN14121_c1_g1	7739.JGI230346	33.5	3e-19	ENOG4111GEQ	S	Function unknown	leukocyte receptor cluster (LRC) member 9
TRINITY_DN14121_c1_g5	7739.JGI132519	50.9	3.5e-40	ENOG4111M11	S	Function unknown	NA
TRINITY_DN14121_c2_g1	400682.PAC_15725714	75.7	2.2e-07	ENOG410ZTD3	S	Function unknown	NA
TRINITY_DN14121_c3_g10	400682.PAC_15709442	59.1	3.5e-50	COG0369	P	Inorganic ion transport and metabolism	Component of the sulfite reductase complex that catalyzes the 6-electron reduction of sulfite to sulfide. This is one of several activities required for the biosynthesis of L- cysteine from sulfate. The flavoprotein component catalyzes the electron flow from NADPH - FAD - FMN to the hemoprotein component (By similarity)
TRINITY_DN14121_c3_g2	400682.PAC_15720711	52.2	3e-160	ENOG410XQRV	S	Function unknown	phospholipase B domain containing
TRINITY_DN14121_c3_g6	7029.ACYPI44940-PA	53.1	3e-18	NA	NA	NA	NA
TRINITY_DN14125_c1_g1	8128.ENSONIP00000003211	40.4	2.8e-08	COG5208	K	Transcription	Nuclear transcription factor Y
TRINITY_DN14126_c3_g2	400682.PAC_15724300	30.9	1e-23	ENOG4111N4S	S	Function unknown	von Willebrand factor type A domain
TRINITY_DN14127_c2_g1	400682.PAC_15713504	65.6	1e-95	COG1184	J	Translation, ribosomal structure and biogenesis	translation initiation factor
TRINITY_DN14127_c3_g1	400682.PAC_15716232	53.8	4.6e-111	COG5184	D	Cell cycle control, cell division, chromosome partitioning	regulator of chromosome condensation
TRINITY_DN14127_c3_g1	400682.PAC_15716232	53.8	4.6e-111	COG5184	Z	Cytoskeleton	regulator of chromosome condensation
TRINITY_DN14127_c3_g5	400682.PAC_15700829	28.1	8.7e-16	NA	NA	NA	NA
TRINITY_DN14127_c3_g6	400682.PAC_15712845	28.8	2.4e-66	ENOG410XSD2	S	Function unknown	G- protein-coupled receptor
TRINITY_DN14128_c3_g1	400682.PAC_15726359	53.4	5.5e-128	COG0402	F	Nucleotide transport and metabolism	deaminase
TRINITY_DN14128_c3_g6	7244.FBpp0238465	62.3	2.5e-12	ENOG4111R9Q	S	Function unknown	Short coiled-coil protein
TRINITY_DN14128_c3_g9	400682.PAC_15727288	63	1.4e-143	COG5187	O	Posttranslational modification, protein turnover, chaperones	Proteasome (Prosome, macropain) 26S subunit, non-ATPase, 6
TRINITY_DN1412_c0_g1	7739.JGI207882	56.4	3.4e-155	COG0526	O	Posttranslational modification, protein turnover, chaperones	Thioredoxin
TRINITY_DN14131_c0_g1	400682.PAC_15724204	68.9	2.6e-155	ENOG410XQKJ	S	Function unknown	regulatory associated protein of MTOR
TRINITY_DN14131_c0_g2	400682.PAC_15724205	32.3	1.3e-19	ENOG41102NY	S	Function unknown	Arrestin domain containing
TRINITY_DN14131_c0_g4	400682.PAC_15724204	42.4	3.3e-173	ENOG410XQKJ	S	Function unknown	regulatory associated protein of MTOR
TRINITY_DN14134_c3_g3	99883.ENSTNIP00000011284	31.2	1.5e-53	ENOG41100CI	U	Intracellular trafficking, secretion, and vesicular transport	Sugar (and other) transporter
TRINITY_DN14137_c0_g1	400682.PAC_15713485	80.5	6.8e-32	ENOG410XNY0	T	Signal transduction mechanisms	Mitogen-activated protein kinase
TRINITY_DN14137_c2_g4	7159.AAEL007958-PA	67.9	1e-64	ENOG410XNY0	T	Signal transduction mechanisms	Mitogen-activated protein kinase
TRINITY_DN14137_c2_g6	7668.SPU_016621tr	75.8	1.5e-08	ENOG410XNY0	T	Signal transduction mechanisms	Mitogen-activated protein kinase
TRINITY_DN14140_c0_g1	400682.PAC_15704687	33.3	1.8e-12	ENOG410XP6I	O	Posttranslational modification, protein turnover, chaperones	cylindromatosis (turban tumor syndrome)
TRINITY_DN14140_c0_g2	400682.PAC_15724404	57.3	7.6e-18	ENOG4111JAT	U	Intracellular trafficking, secretion, and vesicular transport	Microtubule-associated protein 1 light chain 3
TRINITY_DN14140_c0_g3	8090.ENSORLP00000025496	70.1	4.3e-36	COG3277	J	Translation, ribosomal structure and biogenesis	h aca RNA-protein complex component gar1
TRINITY_DN14141_c0_g1	400682.PAC_15714371	45.2	1.5e-43	ENOG410ZIXI	S	Function unknown	rhophilin associated tail protein
TRINITY_DN14141_c0_g2	400682.PAC_15724304	39.8	9.2e-143	ENOG410XRFI	S	Function unknown	triglyceride lipase activity
TRINITY_DN14141_c1_g1	7460.GB15867-PA	30.9	7.5e-36	ENOG410YGTM	S	Function unknown	autophagy related 13
TRINITY_DN14142_c0_g1	6669.DappuP231678	69	1.6e-112	COG1089	M	Cell wall/membrane/envelope biogenesis	GDP-mannose 4,6-dehydratase
TRINITY_DN14142_c0_g3	10228.TriadP37398	81.5	2.7e-284	COG0480	J	Translation, ribosomal structure and biogenesis	Catalyzes the GTP-dependent ribosomal translocation step during translation elongation. During this step, the ribosome changes from the pre-translocational (PRE) to the post- translocational (POST) state as the newly formed A-site-bound peptidyl-tRNA and P-site-bound deacylated tRNA move to the P and E sites, respectively. Catalyzes the coordinated movement of the two tRNA molecules, the mRNA and…
TRINITY_DN14142_c0_g6	7425.NV14848-PA	81.5	4.1e-119	COG0480	J	Translation, ribosomal structure and biogenesis	Catalyzes the GTP-dependent ribosomal translocation step during translation elongation. During this step, the ribosome changes from the pre-translocational (PRE) to the post- translocational (POST) state as the newly formed A-site-bound peptidyl-tRNA and P-site-bound deacylated tRNA move to the P and E sites, respectively. Catalyzes the coordinated movement of the two tRNA molecules, the mRNA and…
TRINITY_DN14142_c0_g7	400682.PAC_15716902	43	0	COG1112	L	Replication, recombination and repair	Helicase
TRINITY_DN14143_c1_g1	400682.PAC_15709525	53.5	3.7e-108	ENOG410XQ3V	S	Function unknown	transmembrane protein 184B
TRINITY_DN14143_c1_g4	400682.PAC_15713127	38.9	6.3e-62	ENOG410XSIZ	K	Transcription	Interferon-related developmental regulator
TRINITY_DN14143_c1_g7	400682.PAC_15720709	57.4	1.4e-99	ENOG410XPFD	S	Function unknown	SAGA-associated factor 29
TRINITY_DN14143_c1_g8	400682.PAC_15727058	30.3	1e-23	ENOG411150A	U	Intracellular trafficking, secretion, and vesicular transport	ATPase, Na K transporting, beta
TRINITY_DN14148_c0_g1	45351.NEMVEDRAFT_v1g183725-PA	45	6.8e-99	COG5109	S	Function unknown	Required for meiotic nuclear division 5 homolog
TRINITY_DN14149_c0_g1	5762.XP_002674004.1	53.8	2.2e-20	ENOG410XPC8	S	Function unknown	copine family
TRINITY_DN14149_c0_g5	5762.XP_002674370.1	47.1	1.7e-20	ENOG410XPC8	S	Function unknown	copine family
TRINITY_DN14151_c2_g3	400682.PAC_15711099	30	2.9e-33	ENOG410YD17	S	Function unknown	NA
TRINITY_DN14151_c3_g1	400682.PAC_15728474	53.6	3.5e-63	NA	NA	NA	NA
TRINITY_DN14151_c4_g1	400682.PAC_15717479	45.1	4e-88	COG5190	K	Transcription	CTD (Carboxy-terminal domain, RNA polymerase II, polypeptide A)
TRINITY_DN14152_c0_g3	400682.PAC_15714677	47.4	1.8e-71	ENOG410XXUP	S	Function unknown	(ABC) transporter
TRINITY_DN14153_c2_g1	400682.PAC_15709687	51	4.7e-07	NA	NA	NA	NA
TRINITY_DN14154_c0_g1	400682.PAC_15727098	39.4	3.4e-127	COG1022	I	Lipid transport and metabolism	Amp-dependent synthetase and ligase
TRINITY_DN14154_c0_g1	400682.PAC_15727098	39.4	3.4e-127	COG3320	Q	Secondary metabolites biosynthesis, transport and catabolism	domain protein
TRINITY_DN14155_c0_g2	7668.SPU_023670tr	45.6	1.9e-69	COG5636	S	Function unknown	Component of the cytosolic iron-sulfur (Fe S) protein assembly machinery. Required for the maturation of extramitochondrial Fe S proteins (By similarity). Has anti- apoptotic effects in the cell. Involved in negative control of H(2)O(2)-induced cell death, probably by tethering the pro- apoptotic factor tah18 in the cytoplasm in the absence of oxidative stress (By similarity)
TRINITY_DN14156_c0_g1	400682.PAC_15727191	53.5	4e-91	COG4870	O	Posttranslational modification, protein turnover, chaperones	cathepsin
TRINITY_DN14156_c0_g2	400682.PAC_15727191	54.3	2.3e-99	COG4870	O	Posttranslational modification, protein turnover, chaperones	cathepsin
TRINITY_DN14158_c2_g3	400682.PAC_15716790	65.9	4.9e-44	COG5256	J	Translation, ribosomal structure and biogenesis	This protein promotes the GTP-dependent binding of aminoacyl-tRNA to the A-site of ribosomes during protein biosynthesis (By similarity)
TRINITY_DN14158_c2_g4	400682.PAC_15713603	55.9	3.5e-114	COG4870	O	Posttranslational modification, protein turnover, chaperones	cathepsin
TRINITY_DN14158_c2_g6	400682.PAC_15716790	51.1	3.9e-136	COG5256	J	Translation, ribosomal structure and biogenesis	This protein promotes the GTP-dependent binding of aminoacyl-tRNA to the A-site of ribosomes during protein biosynthesis (By similarity)
TRINITY_DN14158_c3_g1	8090.ENSORLP00000017801	40.8	6e-19	ENOG410Y41H	S	Function unknown	DAZ interacting protein 3, zinc finger
TRINITY_DN14159_c0_g2	400682.PAC_15706777	29	3.3e-72	ENOG410XQJ4	S	Function unknown	posttranscriptional regulation of gene expression
TRINITY_DN14161_c3_g1	7739.JGI88784	31.4	1.8e-39	ENOG410XVJT	O	Posttranslational modification, protein turnover, chaperones	Quiescin Q6 sulfhydryl oxidase
TRINITY_DN14161_c4_g1	400682.PAC_15721962	58.1	4.7e-31	ENOG410XPUN	S	Function unknown	annexin A7
TRINITY_DN14162_c2_g1	400682.PAC_15722454	42.3	9.8e-35	ENOG41120NI	S	Function unknown	microcephalin 1
TRINITY_DN14162_c3_g4	7739.JGI273291	37.2	1.5e-85	ENOG410YKCM	D	Cell cycle control, cell division, chromosome partitioning	cell division cycle 7 homolog (S. cerevisiae)
TRINITY_DN14163_c3_g5	400682.PAC_15722891	49.6	1.8e-175	COG5158	U	Intracellular trafficking, secretion, and vesicular transport	Vacuolar Protein
TRINITY_DN14163_c3_g7	400682.PAC_15705808	73	3.2e-18	ENOG410ZK1Y	S	Function unknown	NA
TRINITY_DN14164_c3_g1	9913.ENSBTAP00000010509	46.2	1.7e-67	ENOG41107FG	S	Function unknown	organic solute carrier partner 1
TRINITY_DN14164_c3_g2	7739.JGI95890	57.8	1.2e-88	ENOG410XPJZ	T	Signal transduction mechanisms	phosphorylase kinase
TRINITY_DN14164_c4_g1	400682.PAC_15722189	41	1.3e-12	COG5048	S	Function unknown	Zinc finger protein
TRINITY_DN14165_c0_g1	400682.PAC_15724026	47.4	1.3e-55	ENOG410XQAC	S	Function unknown	Katanin p80 (WD repeat containing) subunit B 1
TRINITY_DN14166_c0_g6	400682.PAC_15708867	42.5	1.7e-16	NA	NA	NA	NA
TRINITY_DN14168_c0_g2	3694.POPTR_0008s15730.1	64.2	1.4e-66	COG1791	S	Function unknown	Catalyzes 2 different reactions between oxygene and the acireductone 1,2-dihydroxy-3-keto-5-methylthiopentene (DHK-MTPene) depending upon the metal bound in the active site. Fe-containing acireductone dioxygenase (Fe-ARD) produces formate and 2-keto-4- methylthiobutyrate (KMTB), the alpha-ketoacid precursor of methionine in the methionine recycle pathway. Ni-containing acireductone dioxygenase (N…
TRINITY_DN14170_c0_g2	400682.PAC_15722516	87.9	2.3e-210	COG0123	B	Chromatin structure and dynamics	Histone deacetylase
TRINITY_DN14170_c0_g2	400682.PAC_15722516	87.9	2.3e-210	COG0123	Q	Secondary metabolites biosynthesis, transport and catabolism	Histone deacetylase
TRINITY_DN14171_c1_g3	400682.PAC_15720531	32.9	1.4e-35	ENOG410XS8Y	O	Posttranslational modification, protein turnover, chaperones	o-fucosylpeptide 3-beta-n-acetylglucosaminyltransferase
TRINITY_DN14171_c1_g5	400682.PAC_15720531	33.3	4.6e-34	ENOG410XS8Y	O	Posttranslational modification, protein turnover, chaperones	o-fucosylpeptide 3-beta-n-acetylglucosaminyltransferase
TRINITY_DN14171_c1_g6	7029.ACYPI51143-PA	35.1	2.1e-08	NA	NA	NA	NA
TRINITY_DN14172_c3_g1	13616.ENSMODP00000039390	62.7	3.4e-42	ENOG41123WR	K	Transcription	Transcription elongation factor B (SIII), polypeptide 1 (15kDa, elongin C)
TRINITY_DN14172_c3_g2	400682.PAC_15717061	64.1	5.3e-76	ENOG410XNY0	T	Signal transduction mechanisms	Mitogen-activated protein kinase
TRINITY_DN14172_c4_g1	400682.PAC_15719203	30.7	6.9e-24	NA	NA	NA	NA
TRINITY_DN14173_c0_g1	400682.PAC_15728567	35.2	2.6e-86	ENOG410XT16	S	Function unknown	glycosylphosphatidylinositol anchor attachment protein 1 homolog (yeast)
TRINITY_DN14173_c1_g1	400682.PAC_15715473	47.1	5.3e-96	COG0024	J	Translation, ribosomal structure and biogenesis	Removes the N-terminal methionine from nascent proteins (By similarity)
TRINITY_DN14173_c3_g1	28377.ENSACAP00000014088	53.3	1.5e-30	ENOG410XSD1	L	Replication, recombination and repair	nucleotide-excision repair, DNA gap filling
TRINITY_DN14174_c0_g4	45351.NEMVEDRAFT_v1g101701-PA	56.2	9.5e-27	ENOG4111KGC	U	Intracellular trafficking, secretion, and vesicular transport	intraflagellar transport 43 homolog (Chlamydomonas)
TRINITY_DN14174_c0_g5	400682.PAC_15721372	33.1	6.8e-32	NA	NA	NA	NA
TRINITY_DN14175_c0_g1	400682.PAC_15722023	43	3.6e-102	COG2124	Q	Secondary metabolites biosynthesis, transport and catabolism	Cytochrome p450
TRINITY_DN14178_c3_g1	400682.PAC_15715230	47.7	2.3e-46	ENOG410Y266	A	RNA processing and modification	PCF11, cleavage and polyadenylation factor subunit, homolog (S. cerevisiae)
TRINITY_DN14181_c1_g1	400682.PAC_15705698	41.9	1.5e-09	NA	NA	NA	NA
TRINITY_DN14181_c2_g2	400682.PAC_15719511	50.7	1.2e-204	ENOG410XPKN	S	Function unknown	Engulfment and cell motility
TRINITY_DN14182_c1_g1	400682.PAC_15722130	53.8	4.1e-117	COG1048	C	Energy production and conversion	aconitate hydratase
TRINITY_DN14182_c1_g1	400682.PAC_15722130	53.8	4.1e-117	COG5307	S	Function unknown	and Sec7 domain
TRINITY_DN14183_c0_g2	400682.PAC_15725868	60.4	6.8e-37	ENOG410XNYM	S	Function unknown	chondroitin sulfate
TRINITY_DN14184_c0_g2	400682.PAC_15726961	78.9	0	COG0480	J	Translation, ribosomal structure and biogenesis	Catalyzes the GTP-dependent ribosomal translocation step during translation elongation. During this step, the ribosome changes from the pre-translocational (PRE) to the post- translocational (POST) state as the newly formed A-site-bound peptidyl-tRNA and P-site-bound deacylated tRNA move to the P and E sites, respectively. Catalyzes the coordinated movement of the two tRNA molecules, the mRNA and…
TRINITY_DN14185_c1_g13	400682.PAC_15709616	42.4	6.7e-09	ENOG4111NX8	S	Function unknown	NA
TRINITY_DN14188_c0_g4	59463.ENSMLUP00000005582	33	6.2e-20	ENOG410XZ8W	S	Function unknown	negative regulation of phosphatase activity
TRINITY_DN14189_c2_g5	7739.JGI255796	39.3	2.6e-35	ENOG410Z8N0	U	Intracellular trafficking, secretion, and vesicular transport	Exocyst complex component
TRINITY_DN14191_c0_g1	400682.PAC_15721686	60.2	2.9e-130	ENOG410XPQQ	T	Signal transduction mechanisms	CAMP-dependent protein kinase, catalytic subunit
TRINITY_DN14191_c0_g2	45351.NEMVEDRAFT_v1g193638-PA	60.5	4.4e-222	ENOG410XQCQ	S	Function unknown	EF-hand domain (C-terminal) containing
TRINITY_DN14192_c0_g2	400682.PAC_15712922	36.6	9e-48	ENOG410XUQ7	S	Function unknown	ectopic P-granules autophagy protein 5 homolog (C. elegans)
TRINITY_DN14193_c0_g1	400682.PAC_15727852	79.4	3.6e-104	COG0098	J	Translation, ribosomal structure and biogenesis	Located at the back of the 30S subunit body where it stabilizes the conformation of the head with respect to the body (By similarity)
TRINITY_DN14193_c0_g2	400682.PAC_15727855	54.3	3.4e-97	COG3752	S	Function unknown	DUF1295 domain protein
TRINITY_DN14194_c0_g1	400682.PAC_15719685	62.6	2.2e-121	ENOG410XQHN	S	Function unknown	heterogeneous nuclear ribonucleoprotein
TRINITY_DN14194_c0_g2	400682.PAC_15719685	75.7	2.1e-08	ENOG410XQHN	S	Function unknown	heterogeneous nuclear ribonucleoprotein
TRINITY_DN14195_c2_g5	400682.PAC_15716245	39	1.3e-45	COG5048	S	Function unknown	Zinc finger protein
TRINITY_DN14196_c0_g3	7955.ENSDARP00000109514	32.4	3e-71	COG5599	T	Signal transduction mechanisms	protein tyrosine phosphatase
TRINITY_DN14200_c0_g2	400682.PAC_15714687	59	1.6e-18	ENOG410XPXJ	S	Function unknown	adenylyl cyclase-associated protein
TRINITY_DN14200_c0_g3	7668.SPU_022006tr	55.3	4.5e-115	COG0105	F	Nucleotide transport and metabolism	Major role in the synthesis of nucleoside triphosphates other than ATP. The ATP gamma phosphate is transferred to the NDP beta phosphate via a ping-pong mechanism, using a phosphorylated active-site intermediate (By similarity)
TRINITY_DN14200_c0_g5	400682.PAC_15714687	57.1	1.6e-35	ENOG410XPXJ	S	Function unknown	adenylyl cyclase-associated protein
TRINITY_DN14201_c1_g1	400682.PAC_15723644	100	2.1e-13	ENOG410XNXP	T	Signal transduction mechanisms	Casein Kinase
TRINITY_DN14201_c1_g3	400682.PAC_15723644	82.4	4e-103	ENOG410XNXP	T	Signal transduction mechanisms	Casein Kinase
TRINITY_DN14202_c2_g1	28377.ENSACAP00000003512	39.7	5.7e-60	COG1397	O	Posttranslational modification, protein turnover, chaperones	ADP-ribosylation Crystallin J1
TRINITY_DN14203_c0_g1	9031.ENSGALP00000015528	56.5	2.3e-34	COG5064	U	Intracellular trafficking, secretion, and vesicular transport	importin subunit alpha
TRINITY_DN14204_c2_g1	400682.PAC_15718920	55.8	2.9e-32	COG5599	T	Signal transduction mechanisms	protein tyrosine phosphatase
TRINITY_DN14204_c2_g2	9258.ENSOANP00000016968	47.2	1.2e-37	ENOG410ZJ6F	S	Function unknown	chromosome 7 open reading frame 25
TRINITY_DN14205_c4_g1	400682.PAC_15717844	35.6	6.7e-26	ENOG411019Y	S	Function unknown	NA
TRINITY_DN14205_c5_g1	400682.PAC_15717366	44.4	8.9e-28	ENOG410XPBI	S	Function unknown	member RAS oncogene family
TRINITY_DN14206_c1_g1	400682.PAC_15726173	57.9	1.2e-50	ENOG411009G	S	Function unknown	FSHD Region Gene 1
TRINITY_DN14206_c3_g1	400682.PAC_15710385	51.7	4.4e-161	ENOG410XQ99	S	Function unknown	Dynein cytoplasmic 1 intermediate chain
TRINITY_DN14206_c3_g4	45351.NEMVEDRAFT_v1g186925-PA	49.1	6.3e-21	ENOG4111TZ1	I	Lipid transport and metabolism	Mitochondrial membrane ATP synthase (F(1)F(0) ATP synthase or Complex V) produces ATP from ADP in the presence of a proton gradient across the membrane which is generated by electron transport complexes of the respiratory chain. F-type ATPases consist of two structural domains, F(1) - containing the extramembraneous catalytic core, and F(0) - containing the membrane proton channel, linked togethe…
TRINITY_DN14206_c3_g6	400682.PAC_15727904	69.8	1.2e-221	COG5258	S	Function unknown	GTP binding protein
TRINITY_DN14207_c0_g2	7668.SPU_014482tr	28.7	1.5e-15	ENOG4111YXE	S	Function unknown	chromosome 20 open reading frame 96
TRINITY_DN14209_c1_g1	411467.BACCAP_04476	54.5	2.5e-07	ENOG410Z1E0	S	Function unknown	NA
TRINITY_DN14210_c0_g2	400682.PAC_15719413	35.3	2.9e-25	ENOG4111H3D	S	Function unknown	NACHT, LRR and PYD domains-containing protein
TRINITY_DN14210_c0_g3	400682.PAC_15716856	31.3	1.3e-15	ENOG4112B0K	S	Function unknown	NLR family, CARD domain containing 5
TRINITY_DN14211_c0_g1	400682.PAC_15721305	50.6	9.7e-73	ENOG410XQ10	U	Intracellular trafficking, secretion, and vesicular transport	rho GTPase activating protein
TRINITY_DN14211_c1_g1	400682.PAC_15722339	37.4	4.8e-74	ENOG410XP9G	T	Signal transduction mechanisms	mitogen-activated protein kinase kinase kinase kinase
TRINITY_DN14211_c2_g1	400682.PAC_15712026	51.9	3.6e-19	COG0484	O	Posttranslational modification, protein turnover, chaperones	ATP binding to DnaK triggers the release of the substrate protein, thus completing the reaction cycle. Several rounds of ATP-dependent interactions between DnaJ, DnaK and GrpE are required for fully efficient folding. Also involved, together with DnaK and GrpE, in the DNA replication of plasmids through activation of initiation proteins (By similarity)
TRINITY_DN14211_c2_g2	8090.ENSORLP00000007856	71.8	1.9e-116	COG0529	P	Inorganic ion transport and metabolism	Catalyzes the synthesis of activated sulfate (By similarity)
TRINITY_DN14211_c2_g2	8090.ENSORLP00000007856	71.8	1.9e-116	COG2046	P	Inorganic ion transport and metabolism	Catalyzes the first intracellular reaction of sulfate assimilation, forming adenosine-5'-phosphosulfate (APS) from inorganic sulfate and ATP. Plays an important role in sulfate activation as a component of the biosynthesis pathway of sulfur- containing amino acids (By similarity)
TRINITY_DN14212_c0_g1	400682.PAC_15720413	40.7	3.2e-67	ENOG410XNW8	K	Transcription	General transcription factor IIIC, polypeptide 3, 102kDa
TRINITY_DN14213_c3_g4	400682.PAC_15708731	57.4	6e-13	ENOG41127U6	S	Function unknown	NA
TRINITY_DN14215_c0_g1	400682.PAC_15726055	49.9	1.9e-179	COG1874	G	Carbohydrate transport and metabolism	beta-galactosidase
TRINITY_DN14216_c0_g1	6085.XP_002168456	54.9	3.7e-11	COG5347	U	Intracellular trafficking, secretion, and vesicular transport	domain, ankyrin repeat and PH domain
TRINITY_DN14216_c0_g2	9823.ENSSSCP00000016913	32.3	6.9e-19	COG0515	T	Signal transduction mechanisms	Serine Threonine protein kinase
TRINITY_DN14216_c0_g4	400682.PAC_15715166	26	3.2e-13	ENOG4111FRE	O	Posttranslational modification, protein turnover, chaperones	Secreted metalloproteinase that allows assimilation of proteinaceous substrates. Shows high activities on basic nuclear substrates such as histone and protamine
TRINITY_DN14219_c1_g1	400682.PAC_15725717	29.5	4.4e-29	ENOG410Y6KF	U	Intracellular trafficking, secretion, and vesicular transport	Ancient ubiquitous protein 1
TRINITY_DN14219_c1_g5	400682.PAC_15726774	43.1	7.5e-24	COG0534	V	Defense mechanisms	Mate efflux family protein
TRINITY_DN14222_c0_g1	400682.PAC_15713263	51.8	2.8e-116	ENOG410XRUY	S	Function unknown	Transmembrane protein 144
TRINITY_DN14223_c1_g1	7739.JGI279992	54.9	1.2e-24	ENOG410ZIWC	O	Posttranslational modification, protein turnover, chaperones	nucleoredoxin-like
TRINITY_DN14224_c0_g2	8083.ENSXMAP00000015934	65.1	4.1e-98	COG1788	I	Lipid transport and metabolism	Key enzyme for ketone body catabolism. Transfers the CoA moiety from succinate to acetoacetate. Formation of the enzyme-CoA intermediate proceeds via an unstable anhydride species formed between the carboxylate groups of the enzyme and substrate (By similarity)
TRINITY_DN14224_c0_g2	8083.ENSXMAP00000015934	65.1	4.1e-98	COG2057	I	Lipid transport and metabolism	Key enzyme for ketone body catabolism. Transfers the CoA moiety from succinate to acetoacetate. Formation of the enzyme-CoA intermediate proceeds via an unstable anhydride species formed between the carboxylate groups of the enzyme and substrate (By similarity)
TRINITY_DN14224_c0_g3	431895.XP_001744437.1	65.1	4.8e-187	COG1788	I	Lipid transport and metabolism	Key enzyme for ketone body catabolism. Transfers the CoA moiety from succinate to acetoacetate. Formation of the enzyme-CoA intermediate proceeds via an unstable anhydride species formed between the carboxylate groups of the enzyme and substrate (By similarity)
TRINITY_DN14224_c0_g3	431895.XP_001744437.1	65.1	4.8e-187	COG2057	I	Lipid transport and metabolism	Key enzyme for ketone body catabolism. Transfers the CoA moiety from succinate to acetoacetate. Formation of the enzyme-CoA intermediate proceeds via an unstable anhydride species formed between the carboxylate groups of the enzyme and substrate (By similarity)
TRINITY_DN14224_c0_g5	7668.SPU_009961tr	66.4	3.1e-38	COG1788	I	Lipid transport and metabolism	Key enzyme for ketone body catabolism. Transfers the CoA moiety from succinate to acetoacetate. Formation of the enzyme-CoA intermediate proceeds via an unstable anhydride species formed between the carboxylate groups of the enzyme and substrate (By similarity)
TRINITY_DN14224_c0_g5	7668.SPU_009961tr	66.4	3.1e-38	COG2057	I	Lipid transport and metabolism	Key enzyme for ketone body catabolism. Transfers the CoA moiety from succinate to acetoacetate. Formation of the enzyme-CoA intermediate proceeds via an unstable anhydride species formed between the carboxylate groups of the enzyme and substrate (By similarity)
TRINITY_DN14226_c0_g1	400682.PAC_15728011	48.4	2.9e-29	ENOG410XQ30	K	Transcription	Component of the Mediator complex, a coactivator involved in the regulated transcription of nearly all RNA polymerase II-dependent genes. Mediator functions as a bridge to convey information from gene-specific regulatory proteins to the basal RNA polymerase II transcription machinery. Mediator is recruited to promoters by direct interactions with regulatory proteins and serves as a scaffold for t…
TRINITY_DN14226_c0_g3	400682.PAC_15728009	70.3	4.6e-137	COG0667	C	Energy production and conversion	Aldo keto reductase
TRINITY_DN14226_c0_g5	45351.NEMVEDRAFT_v1g93714-PA	65.4	1.2e-35	COG5162	K	Transcription	TAF10 RNA polymerase II, TATA box binding protein (TBP)-associated factor
TRINITY_DN14228_c0_g1	9031.ENSGALP00000018174	40.3	1.1e-19	COG2124	Q	Secondary metabolites biosynthesis, transport and catabolism	Cytochrome p450
TRINITY_DN14228_c0_g4	7955.ENSDARP00000025234	40.7	5.3e-38	COG2124	Q	Secondary metabolites biosynthesis, transport and catabolism	Cytochrome p450
TRINITY_DN14230_c0_g2	7897.ENSLACP00000005767	44	3.8e-16	COG5126	D	Cell cycle control, cell division, chromosome partitioning	Calcium-binding protein
TRINITY_DN14230_c0_g2	7897.ENSLACP00000005767	44	3.8e-16	COG5126	T	Signal transduction mechanisms	Calcium-binding protein
TRINITY_DN14230_c0_g2	7897.ENSLACP00000005767	44	3.8e-16	COG5126	Z	Cytoskeleton	Calcium-binding protein
TRINITY_DN14232_c0_g1	400682.PAC_15726385	56.4	3.1e-12	ENOG410YQ97	K	Transcription	Toll signaling pathway
TRINITY_DN14234_c1_g3	400682.PAC_15718940	30.6	4.8e-26	ENOG410XRVH	S	Function unknown	alpha- and gamma-adaptin binding protein
TRINITY_DN14234_c1_g4	9646.ENSAMEP00000012160	50	5.4e-38	ENOG4111IXB	I	Lipid transport and metabolism	Phosphomevalonate kinase
TRINITY_DN14235_c1_g3	4950.XP_003682624.1	34.5	1e-43	COG0847	L	Replication, recombination and repair	DNA polymerase iii
TRINITY_DN14235_c1_g6	400682.PAC_15715991	81.8	3e-61	COG1100	S	Function unknown	GTP-binding Protein
TRINITY_DN14236_c0_g1	10090.ENSMUSP00000021930	63.1	7.5e-115	ENOG410YU8V	U	Intracellular trafficking, secretion, and vesicular transport	SideroFleXiN
TRINITY_DN14237_c0_g2	400682.PAC_15725692	54.3	1.6e-20	COG0419	L	Replication, recombination and repair	Involved in DNA double-strand break repair (DSBR). The Rad50 Mre11 complex possesses single-strand endonuclease activity and ATP-dependent double-strand-specific 3'-5' exonuclease activity. Rad50 provides an ATP-dependent control of Mre11 by unwinding and or repositioning DNA ends into the Mre11 active site (By similarity)
TRINITY_DN14238_c0_g1	400682.PAC_15727887	54	4e-18	ENOG410ZZA3	U	Intracellular trafficking, secretion, and vesicular transport	syntaxin
TRINITY_DN14238_c0_g2	400682.PAC_15727888	41.1	6.8e-60	ENOG41101AM	K	Transcription	megakaryoblastic leukemia (translocation) 1
TRINITY_DN14239_c1_g3	7739.JGI119229	57.9	4.8e-89	COG0531	E	Amino acid transport and metabolism	amino acid
TRINITY_DN14239_c1_g5	400682.PAC_15715447	31.2	1.1e-61	ENOG410Z64F	S	Function unknown	RAP1, GTP-GDP dissociation stimulator 1
TRINITY_DN14239_c1_g6	400682.PAC_15717129	27.1	5.8e-38	ENOG4111YEQ	S	Function unknown	NA
TRINITY_DN14239_c1_g7	400682.PAC_15724083	51.2	4.6e-82	COG0531	E	Amino acid transport and metabolism	amino acid
TRINITY_DN14242_c2_g2	400682.PAC_15725494	45.6	8.3e-07	ENOG41125CP	S	Function unknown	NA
TRINITY_DN14243_c1_g1	8090.ENSORLP00000006853	80.2	2.1e-94	COG4581	L	Replication, recombination and repair	helicase
TRINITY_DN14243_c1_g12	400682.PAC_15727080	69.5	2.3e-179	COG0035	F	Nucleotide transport and metabolism	Catalyzes the conversion of uracil and 5-phospho-alpha- D-ribose 1-diphosphate (PRPP) to UMP and diphosphate (By similarity)
TRINITY_DN14243_c1_g12	400682.PAC_15727080	69.5	2.3e-179	COG0572	F	Nucleotide transport and metabolism	uridine kinase
TRINITY_DN14243_c1_g2	400682.PAC_15714646	83.9	2e-45	COG0361	J	Translation, ribosomal structure and biogenesis	however, it seems to stimulate more or less all the activities of the other two initiation factors, IF-2 and IF-3 (By similarity)
TRINITY_DN14243_c1_g6	400682.PAC_15724611	87.4	4.6e-220	COG1222	O	Posttranslational modification, protein turnover, chaperones	26S protease regulatory subunit
TRINITY_DN14245_c2_g2	400682.PAC_15723138	51.4	4.5e-135	COG5157	K	Transcription	cell division cycle 73, Paf1 RNA polymerase II complex component, homolog (S. cerevisiae)
TRINITY_DN14245_c3_g4	9986.ENSOCUP00000011654	65	2e-167	COG4992	E	Amino acid transport and metabolism	Acetylornithine aminotransferase
TRINITY_DN14245_c3_g7	400682.PAC_15725741	45.9	1.8e-92	ENOG410ZX8Y	S	Function unknown	Rhotekin
TRINITY_DN14246_c0_g2	400682.PAC_15720802	80.3	8.3e-193	ENOG410XRAZ	L	Replication, recombination and repair	atp-dependent rna helicase
TRINITY_DN14248_c0_g1	653948.CCA14246	32.3	2.6e-07	COG0666	S	Function unknown	Ankyrin Repeat
TRINITY_DN14249_c2_g1	31033.ENSTRUP00000022526	36.4	2.5e-111	ENOG410XPFJ	S	Function unknown	Tuberous sclerosis 2
TRINITY_DN14249_c2_g2	400682.PAC_15715117	35.1	4.1e-07	NA	NA	NA	NA
TRINITY_DN14249_c2_g5	400682.PAC_15722447	73.8	2.4e-10	COG1095	K	Transcription	DNA-directed RNA Polymerase
TRINITY_DN14249_c2_g9	7739.JGI124918	83.5	1.3e-63	COG1095	K	Transcription	DNA-directed RNA Polymerase
TRINITY_DN14251_c0_g1	51511.ENSCSAVP00000016464	46.2	2.7e-154	COG1643	L	Replication, recombination and repair	helicase
TRINITY_DN14251_c0_g2	400682.PAC_15720437	40.2	2.7e-46	ENOG4111QF2	S	Function unknown	Zinc finger, HIT-type containing 6
TRINITY_DN14251_c0_g3	8364.ENSXETP00000052056	34.1	2.6e-10	ENOG41123S0	U	Intracellular trafficking, secretion, and vesicular transport	bcl-2-related
TRINITY_DN14251_c0_g4	400682.PAC_15727460	63.9	2.3e-170	ENOG410XP67	I	Lipid transport and metabolism	)-reductase
TRINITY_DN14252_c1_g2	400682.PAC_15726162	24.1	3.8e-35	NA	NA	NA	NA
TRINITY_DN14253_c1_g1	10141.ENSCPOP00000003411	40.5	5.1e-55	ENOG410XR9F	K	Transcription	Mortality factor 4-like protein
TRINITY_DN14254_c2_g1	400682.PAC_15717148	64.5	1.5e-20	COG5213	A	RNA processing and modification	mRNA processing
TRINITY_DN14254_c2_g4	4641.GSMUA_Achr3P04840_001	44	2e-08	COG0186	J	Translation, ribosomal structure and biogenesis	One of the primary rRNA binding proteins, it binds specifically to the 5'-end of 16S ribosomal
TRINITY_DN14255_c0_g3	400682.PAC_15718788	59.8	2.2e-36	COG2801	L	Replication, recombination and repair	Retrotransposon protein
TRINITY_DN14259_c4_g1	400682.PAC_15717778	43.3	7e-57	NA	NA	NA	NA
TRINITY_DN14260_c0_g1	400682.PAC_15699223	51.9	5.8e-25	COG2801	L	Replication, recombination and repair	Retrotransposon protein
TRINITY_DN14264_c1_g1	8364.ENSXETP00000046061	48.9	6.8e-35	COG0652	O	Posttranslational modification, protein turnover, chaperones	peptidyl-prolyl cis-trans isomerase activity
TRINITY_DN14264_c1_g2	400682.PAC_15721762	43.7	2.3e-97	COG0457	S	Function unknown	repeat-containing protein
TRINITY_DN14264_c1_g2	400682.PAC_15721762	43.7	2.3e-97	COG4886	S	Function unknown	leucine Rich Repeat
TRINITY_DN14265_c0_g2	9031.ENSGALP00000025099	36.7	8.7e-117	ENOG410YQ45	S	Function unknown	tRNA methyltransferase 44 homolog (S. cerevisiae)
TRINITY_DN14265_c0_g3	400682.PAC_15723605	68.4	6.6e-63	COG0244	J	Translation, ribosomal structure and biogenesis	50s ribosomal protein L10
TRINITY_DN14265_c0_g6	400682.PAC_15715150	31.2	1.1e-17	COG5048	S	Function unknown	Zinc finger protein
TRINITY_DN14268_c1_g13	400682.PAC_15716412	81.9	4.2e-97	ENOG410XSTS	K	Transcription	t-box transcription factor
TRINITY_DN14268_c1_g4	9031.ENSGALP00000001866	45.3	1.2e-68	COG1078	S	Function unknown	Metal Dependent Phosphohydrolase
TRINITY_DN14268_c1_g6	400682.PAC_15728366	51.6	1.4e-64	NA	NA	NA	NA
TRINITY_DN14269_c3_g3	31033.ENSTRUP00000047041	37.2	4.1e-28	ENOG410XTER	S	Function unknown	syntaxin binding protein
TRINITY_DN14271_c3_g1	400682.PAC_15727063	58.5	1e-64	COG5053	J	Translation, ribosomal structure and biogenesis	eukaryotic translation initiation factor
TRINITY_DN14273_c2_g1	400682.PAC_15728641	76.1	2.3e-55	COG2075	J	Translation, ribosomal structure and biogenesis	Ribosomal protein
TRINITY_DN14274_c1_g1	400682.PAC_15717876	54.5	2.3e-81	COG5114	B	Chromatin structure and dynamics	transcriptional
TRINITY_DN14274_c1_g2	402676.XP_002174014.1	88.5	6.5e-52	COG1100	S	Function unknown	GTP-binding Protein
TRINITY_DN14274_c1_g3	400682.PAC_15712800	61.2	2.1e-46	ENOG410XQMZ	G	Carbohydrate transport and metabolism	Mannosidase alpha class
TRINITY_DN14274_c1_g5	400682.PAC_15724901	41	1.4e-112	ENOG410XQMZ	G	Carbohydrate transport and metabolism	Mannosidase alpha class
TRINITY_DN14274_c1_g7	45351.NEMVEDRAFT_v1g238733-PA	65.3	3e-19	COG1100	S	Function unknown	GTP-binding Protein
TRINITY_DN14275_c0_g2	7955.ENSDARP00000121684	39.7	2.3e-29	ENOG410ZQGI	A	RNA processing and modification	splicing factor, suppressor of white-apricot homolog (Drosophila)
TRINITY_DN14275_c0_g4	400682.PAC_15725831	53.8	2.7e-165	ENOG410XNP5	S	Function unknown	TNF receptor-associated factor 7, E3 ubiquitin protein ligase
TRINITY_DN14276_c1_g1	400682.PAC_15700393	51.4	4.9e-12	NA	NA	NA	NA
TRINITY_DN14277_c0_g1	44689.DDB0238809	36.3	1.8e-52	COG1680	V	Defense mechanisms	Beta-lactamase
TRINITY_DN14277_c4_g1	400682.PAC_15727769	62.1	3.1e-205	ENOG410XNPH	T	Signal transduction mechanisms	protein serine/threonine kinase activity
TRINITY_DN14277_c5_g1	400682.PAC_15716218	46	8.2e-45	ENOG410XRCA	U	Intracellular trafficking, secretion, and vesicular transport	ATPase (type
TRINITY_DN14278_c3_g10	400682.PAC_15716878	46.4	1.7e-89	ENOG410XQQ3	S	Function unknown	coiled-coil domain containing 164
TRINITY_DN14278_c3_g2	7739.JGI61562	76.2	1.6e-52	COG5078	O	Posttranslational modification, protein turnover, chaperones	ubiquitin-conjugating enzyme
TRINITY_DN14278_c3_g9	400682.PAC_15723733	77.1	4.5e-138	ENOG410XPZJ	S	Function unknown	Tho complex
TRINITY_DN14279_c0_g2	400682.PAC_15717539	34.2	7.6e-33	ENOG410XP6N	S	Function unknown	G-protein signaling modulator
TRINITY_DN14280_c0_g1	400682.PAC_15711502	67.2	4.2e-100	ENOG410XQVU	S	Function unknown	nudC domain containing
TRINITY_DN14280_c0_g5	400682.PAC_15713176	61.4	1.8e-54	ENOG410XPGP	T	Signal transduction mechanisms	Casein Kinase
TRINITY_DN14280_c0_g6	30611.ENSOGAP00000013912	57.1	4.6e-103	COG0476	H	Coenzyme transport and metabolism	small protein activating enzyme activity
TRINITY_DN14281_c0_g2	400682.PAC_15718182	30.8	1e-27	ENOG410XQAI	T	Signal transduction mechanisms	Discoidin domain receptor tyrosine kinase
TRINITY_DN14281_c0_g3	400682.PAC_15718176	52.6	5.2e-67	ENOG410XQAI	T	Signal transduction mechanisms	Discoidin domain receptor tyrosine kinase
[truncated: 8,466 more rows]
