# Supplementary material for: Freshwater sponge hosts and their green algae symbionts: a tractable model to understand intracellular symbiosis
Source: PeerJ. 2021 Feb 11;9:e10654. doi: 10.7717/peerj.10654 (PMC7882143; doi:10.7717/peerj.10654)
Supplement: Supplemental Information 19 [file peerj-09-10654-s019.xlsx]

## Sheet: Sheet1
Query	NR_hit	NR_description	NR_species	NR_identity	NR_evalue
TRINITY_DN10001_c0_g1	XP_015888627.1	tRNA-specific adenosine deaminase TAD1 [Ziziphus jujuba]	Ziziphus_jujuba	31.2	2.2e-28
TRINITY_DN10007_c0_g1	RYR07998.1	hypothetical protein Ahy_B05g075516 isoform B [Arachis hypogaea]	Arachis_hypogaea	100	9e-37
TRINITY_DN10027_c0_g1	XP_017179040.1	PREDICTED: transposon Tf2-1 polyprotein [Malus domestica]	Malus_domestica	49.2	2.3e-08
TRINITY_DN10028_c0_g1	XP_023929170.1	ras-related C3 botulinum toxin substrate 1-like isoform X2 [Quercus suber]	Quercus_suber	70.4	2e-80
TRINITY_DN10034_c0_g1	RYR74476.1	hypothetical protein Ahy_A02g009213 isoform E [Arachis hypogaea]	Arachis_hypogaea	100	1.6e-36
TRINITY_DN10047_c0_g1	GAQ84181.1	NADH dehydrogenase (ubiquinone) Fe-S protein 4 [Klebsormidium nitens]	Klebsormidium_nitens	53.8	2.4e-25
TRINITY_DN10049_c0_g1	XP_026443923.1	ABC transporter E family member 2 [Papaver somniferum]	Papaver_somniferum	77.2	1.2e-273
TRINITY_DN10051_c0_g1	PRW57451.1	Ubiquitin-fold modifier 1 [Chlorella sorokiniana]	Chlorella_sorokiniana	85.4	7.4e-34
TRINITY_DN10058_c0_g1	RQL94013.1	hypothetical protein DY000_00020286 [Brassica cretica]	Brassica_cretica	35	3.6e-79
TRINITY_DN10059_c0_g1	GAX80671.1	hypothetical protein CEUSTIGMA_g8106.t1 [Chlamydomonas eustigma]	Chlamydomonas_eustigma	52.4	4e-29
TRINITY_DN10059_c0_g2	PRW60100.1	adenosine deaminase [Chlorella sorokiniana]	Chlorella_sorokiniana	50.7	1.3e-47
TRINITY_DN10081_c0_g2	XP_009350076.1	PREDICTED: uncharacterized protein LOC103941593 [Pyrus x bretschneideri]	Pyrus_x_bretschneideri	66.7	7.3e-24
TRINITY_DN10109_c0_g1	OAE31747.1	hypothetical protein AXG93_4874s1100 [Marchantia polymorpha subsp. ruderalis]	Marchantia_polymorpha	51	1.1e-51
TRINITY_DN10122_c0_g1	BAJ92600.1	predicted protein [Hordeum vulgare subsp. vulgare]	Hordeum_vulgare	39.5	1.6e-35
TRINITY_DN10136_c0_g1	AAM29179.1	prohibitin protein Wph [Triticum aestivum]	Triticum_aestivum	68.8	3.7e-97
TRINITY_DN10141_c0_g1	XP_023882697.1	nucleoside diphosphate kinase-like [Quercus suber]	Quercus_suber	60.8	2.1e-51
TRINITY_DN10144_c0_g1	AST08888.1	NADH dehydrogenase subunit 9 (mitochondrion) [Micractinium conductrix]	Micractinium_conductrix	64.8	1.2e-63
TRINITY_DN10145_c0_g1	XP_024628842.1	probable serine protease EDA2 [Medicago truncatula]	Medicago_truncatula	32.6	7.8e-44
TRINITY_DN10188_c0_g1	XP_019107507.1	PREDICTED: serine/arginine-rich splicing factor SC35 [Beta vulgaris subsp. vulgaris]	Beta_vulgaris	59.3	6.9e-23
TRINITY_DN10200_c0_g1	XP_013661993.1	monothiol glutaredoxin-S17-like [Brassica napus]	Brassica_napus	49.6	1.7e-86
TRINITY_DN10201_c0_g1	XP_023881361.1	mitochondrial import receptor subunit tom40-like [Quercus suber]	Quercus_suber	28.8	2.2e-17
TRINITY_DN10201_c0_g2	GBG86372.1	hypothetical protein CBR_g41367 [Chara braunii]	Chara_braunii	47.4	2.4e-24
TRINITY_DN10204_c0_g1	GAQ81806.1	hypothetical protein KFL_000910250 [Klebsormidium nitens]	Klebsormidium_nitens	61.5	8.4e-67
TRINITY_DN10209_c0_g1	XP_002967178.1	glutathione S-transferase T1 [Selaginella moellendorffii]	Selaginella_moellendorffii	45	9.5e-42
TRINITY_DN10222_c0_g1	PNW81851.1	hypothetical protein CHLRE_06g263150v5 [Chlamydomonas reinhardtii]	Chlamydomonas_reinhardtii	30.3	9.6e-36
TRINITY_DN10230_c0_g1	PNR52746.1	hypothetical protein PHYPA_009121 [Physcomitrella patens]	Physcomitrella_patens	29.2	1.4e-22
TRINITY_DN10241_c0_g1	OAE26895.1	hypothetical protein AXG93_4762s1050 [Marchantia polymorpha subsp. ruderalis]	Marchantia_polymorpha	31.1	1.4e-12
TRINITY_DN10275_c0_g1	YP_008816172.1	cytochrome c oxidase subunit 1 (mitochondrion) [Roya obtusa]	Roya_obtusa	65.7	4.8e-185
TRINITY_DN10275_c1_g1	ABX82566.1	cytochrome c oxidase subunit 1 (mitochondrion) [Trebouxia aggregata]	Trebouxia_aggregata	75	1.5e-51
TRINITY_DN10289_c0_g1	GBF95813.1	3-oxo-5-alpha-steroid 4-dehydrogenase [Raphidocelis subcapitata]	Raphidocelis_subcapitata	48.2	4.8e-50
TRINITY_DN10341_c0_g4	XP_024994142.1	probable signal peptidase complex subunit 1 [Cynara cardunculus var. scolymus]	Cynara_cardunculus	52.1	1.3e-13
TRINITY_DN10347_c0_g1	XP_015936747.1	defensin-like protein [Arachis duranensis]	Arachis_duranensis	100	1.6e-39
TRINITY_DN10369_c0_g1	XP_001415918.1	predicted protein, partial [Ostreococcus lucimarinus CCE9901]	Ostreococcus_sp._'lucimarinus'	47.5	1.4e-11
TRINITY_DN10371_c0_g1	BAN14809.1	gamma-tubulin [Ginkgo biloba]	Ginkgo_biloba	74.3	4.7e-192
TRINITY_DN10380_c0_g1	XP_020193433.1	protein DJ-1 homolog A [Aegilops tauschii subsp. tauschii]	Aegilops_tauschii	47.5	6.2e-35
TRINITY_DN10387_c0_g1	XP_001690587.1	predicted protein, partial [Chlamydomonas reinhardtii]	Chlamydomonas_reinhardtii	41.5	7.2e-12
TRINITY_DN10396_c0_g4	XP_018441020.1	PREDICTED: kinesin-like protein KIN-13B [Raphanus sativus]	Raphanus_sativus	36.9	1.3e-13
TRINITY_DN10398_c0_g1	RYR48388.1	hypothetical protein Ahy_A07g034409 [Arachis hypogaea]	Arachis_hypogaea	60	1.2e-14
TRINITY_DN10413_c0_g1	P0C8M8.1	RecName: Full=Probable serine/threonine-protein kinase CCRP1; AltName: Full=Cell-cycle related Protein 1	Zea_mays	35.9	3e-94
TRINITY_DN10420_c0_g1	RYQ95957.1	hypothetical protein Ahy_B08g091358 isoform A [Arachis hypogaea]	Arachis_hypogaea	100	3.1e-41
TRINITY_DN10448_c0_g1	XP_023925858.1	momilactone A synthase-like [Quercus suber]	Quercus_suber	46.7	4.1e-08
TRINITY_DN10475_c0_g1	RYR04381.1	hypothetical protein Ahy_B06g084100 isoform A [Arachis hypogaea]	Arachis_hypogaea	100	2.7e-27
TRINITY_DN10475_c0_g4	XP_015970932.1	5-methyltetrahydropteroyltriglutamate--homocysteine methyltransferase 1 [Arachis duranensis]	Arachis_duranensis	100	8.3e-35
TRINITY_DN10493_c0_g1	XP_002501961.1	sialic-acid o-acetylesterase-like protein [Micromonas commoda]	Micromonas_commoda	31.5	3e-39
TRINITY_DN10512_c0_g1	XP_006295517.1	40S ribosomal protein S15a isoform X1 [Capsella rubella]	Capsella_rubella	72.7	5e-51
TRINITY_DN10519_c0_g1	XP_013902846.1	60S acidic ribosomal protein P1 [Monoraphidium neglectum]	Monoraphidium_neglectum	60.9	1.2e-13
TRINITY_DN10522_c0_g1	XP_023926304.1	uncharacterized protein LOC112037708 [Quercus suber]	Quercus_suber	31.9	2e-29
TRINITY_DN10524_c0_g2	XP_010668728.1	PREDICTED: kinesin-like protein KIF23, partial [Beta vulgaris subsp. vulgaris]	Beta_vulgaris	37	5.5e-25
TRINITY_DN10524_c0_g3	XP_002509407.1	predicted protein [Micromonas commoda]	Micromonas_commoda	35.6	1.5e-13
TRINITY_DN10572_c0_g2	XP_023753174.1	uncharacterized protein K02A2.6-like, partial [Lactuca sativa]	Lactuca_sativa	43.3	5.4e-10
TRINITY_DN10579_c0_g1	PTQ35039.1	hypothetical protein MARPO_0074s0031 [Marchantia polymorpha]	Marchantia_polymorpha	36.9	1.4e-23
TRINITY_DN10579_c0_g2	PNR41378.1	hypothetical protein PHYPA_018781 [Physcomitrella patens]	Physcomitrella_patens	34	6.8e-08
TRINITY_DN10583_c0_g1	KXZ56133.1	hypothetical protein GPECTOR_1g112 [Gonium pectorale]	Gonium_pectorale	55.2	2.9e-49
TRINITY_DN10584_c0_g1	XP_022937155.1	sister chromatid cohesion protein PDS5 homolog A-like isoform X3 [Cucurbita moschata]	Cucurbita_moschata	23.6	3.2e-11
TRINITY_DN10586_c0_g1	XP_013895774.1	60S ribosome subunit biogeneis protein NIP7-like protein [Monoraphidium neglectum]	Monoraphidium_neglectum	68.2	6.4e-68
TRINITY_DN10609_c0_g1	GAQ90427.1	mitochondrial ribosomal protein S9 precursor [Klebsormidium nitens]	Klebsormidium_nitens	42.3	9.3e-28
TRINITY_DN10615_c0_g1	XP_015956441.1	dormancy-associated protein 1 [Arachis duranensis]	Arachis_duranensis	100	4.2e-25
TRINITY_DN10620_c0_g1	XP_015953300.1	isocitrate lyase 1 [Arachis duranensis]	Arachis_duranensis	100	4.3e-110
TRINITY_DN10623_c0_g1	XP_024369743.1	ubiquitin carboxyl-terminal hydrolase 3-like [Physcomitrella patens]	Physcomitrella_patens	50.9	9.2e-60
TRINITY_DN10631_c0_g1	GBG75802.1	hypothetical protein CBR_g21047 [Chara braunii]	Chara_braunii	48.1	8e-27
TRINITY_DN10646_c0_g1	XP_010247609.1	PREDICTED: NADH dehydrogenase [ubiquinone] 1 alpha subcomplex subunit 13-B [Nelumbo nucifera]	Nelumbo_nucifera	47.6	3.9e-27
TRINITY_DN10656_c0_g1	BAJ98399.1	predicted protein [Hordeum vulgare subsp. vulgare]	Hordeum_vulgare	75.3	1.3e-114
TRINITY_DN10658_c0_g1	XP_021690825.1	60S ribosomal protein L7a-1-like [Hevea brasiliensis]	Hevea_brasiliensis	63.8	3.8e-86
TRINITY_DN10661_c0_g2	GBG82316.1	hypothetical protein CBR_g34600 [Chara braunii]	Chara_braunii	49.4	4e-43
TRINITY_DN10669_c0_g1	XP_021297380.1	uncharacterized protein LOC110426487 [Herrania umbratica]	Herrania_umbratica	42.8	6.8e-146
TRINITY_DN10671_c0_g1	ABY77657.1	At5g03860, partial [Arabidopsis thaliana]	Arabidopsis_thaliana	100	3.4e-36
TRINITY_DN10671_c0_g2	RYR77801.1	hypothetical protein Ahy_A01g002422 isoform F [Arachis hypogaea]	Arachis_hypogaea	100	3.3e-89
TRINITY_DN10672_c0_g1	RXH91918.1	hypothetical protein DVH24_020941 [Malus domestica]	Malus_domestica	52.3	7.3e-10
TRINITY_DN10674_c0_g1	XP_005648013.1	DEAD-domain-containing protein [Coccomyxa subellipsoidea C-169]	Coccomyxa_subellipsoidea	55.5	3.9e-133
TRINITY_DN10697_c0_g2	XP_015970331.1	enolase 2 [Arachis duranensis]	Arachis_duranensis	100	2.1e-28
TRINITY_DN10711_c0_g1	KVI11970.1	Heat shock protein 70, conserved site-containing protein [Cynara cardunculus var. scolymus]	Cynara_cardunculus	100	1e-31
TRINITY_DN10711_c0_g3	AAM48131.1	heat shock protein 70 [Saussurea medusa]	Saussurea_medusa	100	1.7e-29
TRINITY_DN10718_c0_g1	GAQ90304.1	hypothetical protein KFL_006240065 [Klebsormidium nitens]	Klebsormidium_nitens	63.2	3.1e-148
TRINITY_DN10724_c0_g2	XP_009385731.1	PREDICTED: stomatin-like protein 2, mitochondrial [Musa acuminata subsp. malaccensis]	Musa_acuminata	50.8	3.2e-76
TRINITY_DN10726_c0_g1	XP_023911569.1	mitochondrial substrate carrier family protein L-like [Quercus suber]	Quercus_suber	25.8	6.9e-19
TRINITY_DN10729_c0_g1	OAE25116.1	hypothetical protein AXG93_3217s1320 [Marchantia polymorpha subsp. ruderalis]	Marchantia_polymorpha	25.5	1.8e-25
TRINITY_DN10734_c0_g1	XP_015959623.1	ABA-responsive protein ABR17 [Arachis duranensis]	Arachis_duranensis	100	3.8e-81
TRINITY_DN1073_c0_g1	XP_001418646.1	predicted protein [Ostreococcus lucimarinus CCE9901]	Ostreococcus_sp._'lucimarinus'	29.9	7.3e-26
TRINITY_DN10741_c0_g1	XP_001702304.1	flagellar/basal body protein [Chlamydomonas reinhardtii]	Chlamydomonas_reinhardtii	47.9	5e-13
TRINITY_DN10759_c0_g2	XP_012831963.1	PREDICTED: probable histone H2A variant 1 [Erythranthe guttata]	Erythranthe_guttata	87.4	2.8e-40
TRINITY_DN10762_c0_g1	XP_004304691.1	PREDICTED: ATP synthase mitochondrial F1 complex assembly factor 2 [Fragaria vesca subsp. vesca]	Fragaria_vesca	32.4	1.1e-24
TRINITY_DN10768_c0_g1	PUZ60208.1	hypothetical protein GQ55_4G105800 [Panicum hallii var. hallii]	Panicum_hallii	42	6.2e-68
TRINITY_DN10795_c0_g1	XP_023916084.1	coronin-like protein crn1 [Quercus suber]	Quercus_suber	42.7	6.7e-48
TRINITY_DN10804_c0_g1	XP_020579044.1	THO complex subunit 1 [Phalaenopsis equestris]	Phalaenopsis_equestris	34.8	2.2e-64
TRINITY_DN10810_c0_g1	XP_023926991.1	lactamase-like protein ptaB [Quercus suber]	Quercus_suber	41.3	4.6e-53
TRINITY_DN10820_c0_g1	XP_018444291.1	PREDICTED: protein PGR-like [Raphanus sativus]	Raphanus_sativus	44.2	2.3e-37
TRINITY_DN10829_c0_g1	XP_019103372.1	PREDICTED: uncharacterized protein LOC109133910 [Beta vulgaris subsp. vulgaris]	Beta_vulgaris	95.5	2.3e-23
TRINITY_DN10830_c0_g2	XP_020084301.1	molybdate-anion transporter-like [Ananas comosus]	Ananas_comosus	38.5	1.7e-40
TRINITY_DN10833_c0_g1	XP_023926151.1	60S ribosomal protein L44 [Quercus suber]	Quercus_suber	77.1	8.3e-38
TRINITY_DN10852_c0_g3	GAU20256.1	hypothetical protein TSUD_353210 [Trifolium subterraneum]	Trifolium_subterraneum	43.4	4.8e-21
TRINITY_DN10862_c0_g2	XP_009594981.1	PREDICTED: cleft lip and palate transmembrane protein 1 homolog isoform X2 [Nicotiana tomentosiformis]	Nicotiana_tomentosiformis	46.7	3.7e-78
TRINITY_DN10862_c0_g3	XP_019432410.1	PREDICTED: cleft lip and palate transmembrane protein 1 homolog [Lupinus angustifolius]	Lupinus_angustifolius	30.6	1.8e-28
TRINITY_DN10864_c0_g1	KCW75723.1	hypothetical protein EUGRSUZ_D00103 [Eucalyptus grandis]	Eucalyptus_grandis	28.9	1.8e-41
TRINITY_DN10868_c0_g1	PSC71995.1	40S ribosomal S2-4 [Micractinium conductrix]	Micractinium_conductrix	97.6	2.6e-40
TRINITY_DN10876_c0_g2	YP_005090501.1	cytochrome c biogenesis C (mitochondrion) [Lotus japonicus]	Lotus_japonicus	100	5.6e-50
TRINITY_DN10884_c0_g1	XP_023901944.1	glucose-repressible alcohol dehydrogenase transcriptional effector-like [Quercus suber]	Quercus_suber	40.7	1.6e-66
TRINITY_DN10912_c0_g3	XP_006391967.1	chaperone protein dnaJ 50 [Eutrema salsugineum]	Eutrema_salsugineum	37.5	5.2e-22
TRINITY_DN10921_c0_g1	XP_010233898.1	ubiquitin-conjugating enzyme E2 22 [Brachypodium distachyon]	Brachypodium_distachyon	61.3	1.1e-58
TRINITY_DN10961_c0_g1	PNH01638.1	deflagellation-inducible protein [Tetrabaena socialis]	Tetrabaena_socialis	63.2	3.5e-28
TRINITY_DN10961_c0_g2	XP_027934459.1	protein SAR DEFICIENT 4 [Vigna unguiculata]	Vigna_unguiculata	31.8	6.4e-29
TRINITY_DN10972_c0_g1	XP_024390229.1	N-acetylserotonin O-methyltransferase-like protein isoform X1 [Physcomitrella patens]	Physcomitrella_patens	52	2e-19
TRINITY_DN10973_c0_g2	XP_024530613.1	uncharacterized protein LOC9645923 [Selaginella moellendorffii]	Selaginella_moellendorffii	45.3	1.5e-15
TRINITY_DN10975_c1_g1	BAK01897.1	predicted protein [Hordeum vulgare subsp. vulgare]	Hordeum_vulgare	75.3	1.4e-117
TRINITY_DN10977_c0_g1	XP_015941936.1	ATP synthase subunit beta, mitochondrial [Arachis duranensis]	Arachis_duranensis	100	2e-43
TRINITY_DN10978_c0_g1	XP_012828783.1	PREDICTED: putative phosphatidylglycerol/phosphatidylinositol transfer protein DDB_G0282179 [Erythranthe guttata]	Erythranthe_guttata	27.8	4.3e-07
TRINITY_DN1097_c0_g1	GBG91878.1	hypothetical protein CBR_g53937 [Chara braunii]	Chara_braunii	31.6	2.5e-34
TRINITY_DN10982_c0_g1	XP_015964885.1	thiamine thiazole synthase 2, chloroplastic [Arachis duranensis]	Arachis_duranensis	99	2.3e-51
TRINITY_DN10987_c0_g1	RWR89285.1	40S ribosomal protein S13 [Cinnamomum micranthum f. kanehirae]	Cinnamomum_micranthum	81.5	2.8e-63
TRINITY_DN11019_c0_g1	BAD90809.1	histone 3 [Conocephalum conicum]	Conocephalum_conicum	99.3	4.9e-66
TRINITY_DN11026_c0_g1	KMZ76066.1	ADP-ribosylation factor 1 [Zostera marina]	Zostera_marina	48.7	1.1e-46
TRINITY_DN11059_c0_g1	XP_015937554.1	GTP-binding nuclear protein Ran-3 [Arachis duranensis]	Arachis_duranensis	100	3.6e-30
TRINITY_DN1105_c0_g2	XP_004141900.1	PREDICTED: ADP-ribosylation factor 1 [Cucumis sativus]	Cucumis_sativus	53.8	2.9e-24
TRINITY_DN11071_c0_g1	XP_027928790.1	pectin acetylesterase 5-like isoform X2 [Vigna unguiculata]	Vigna_unguiculata	27.3	1.8e-13
TRINITY_DN11101_c0_g1	XP_024393146.1	N-alpha-acetyltransferase 50-like [Physcomitrella patens]	Physcomitrella_patens	57.3	5.6e-47
TRINITY_DN11108_c0_g1	XP_018848039.1	PREDICTED: ras-related protein RABC2a-like isoform X3 [Juglans regia]	Juglans_regia	33.9	1.1e-14
TRINITY_DN11112_c0_g1	XP_015968752.1	cathepsin B-like protease 2 [Arachis duranensis]	Arachis_duranensis	100	1.5e-36
TRINITY_DN11114_c0_g2	BAJ99614.1	predicted protein [Hordeum vulgare subsp. vulgare]	Hordeum_vulgare	40.4	7.6e-11
TRINITY_DN11114_c0_g3	XP_023883604.1	elongation factor 1-beta-like [Quercus suber]	Quercus_suber	57.3	7.2e-26
TRINITY_DN11155_c0_g1	XP_001692489.1	flagellar associated protein [Chlamydomonas reinhardtii]	Chlamydomonas_reinhardtii	80.8	2.3e-68
TRINITY_DN11161_c0_g1	XP_001694924.1	predicted protein [Chlamydomonas reinhardtii]	Chlamydomonas_reinhardtii	36.2	1.1e-27
TRINITY_DN11164_c0_g3	PNR50031.1	hypothetical protein PHYPA_011928 [Physcomitrella patens]	Physcomitrella_patens	77.1	1.7e-87
TRINITY_DN11169_c0_g1	KZV15435.1	polyribonucleotide nucleotidyltransferase 1, chloroplastic-like [Dorcoceras hygrometricum]	Dorcoceras_hygrometricum	71.1	6e-27
TRINITY_DN11171_c0_g1	GAQ90830.1	dolichyl-phosphate mannosyltransferase polypeptide 2 regulatory subunit [Klebsormidium nitens]	Klebsormidium_nitens	47.4	1.5e-12
TRINITY_DN1118_c0_g1	XP_015940477.1	Bowman-Birk type proteinase inhibitor A-II [Arachis duranensis]	Arachis_duranensis	100	4.9e-35
TRINITY_DN11206_c0_g1	XP_011660094.1	PREDICTED: L-ascorbate oxidase-like [Cucumis sativus]	Cucumis_sativus	28.4	9.2e-40
TRINITY_DN11207_c0_g1	GAU41172.1	hypothetical protein TSUD_89680 [Trifolium subterraneum]	Trifolium_subterraneum	61	2e-30
TRINITY_DN11250_c0_g1	GBG85501.1	hypothetical protein CBR_g40140 [Chara braunii]	Chara_braunii	45.9	6.3e-21
TRINITY_DN11251_c0_g1	XP_023908637.1	uncharacterized protein LOC112020310 [Quercus suber]	Quercus_suber	32.6	3.2e-29
TRINITY_DN11283_c0_g1	XP_004296112.1	PREDICTED: FH protein interacting protein FIP2-like [Fragaria vesca subsp. vesca]	Fragaria_vesca	33.6	1.9e-07
TRINITY_DN11289_c0_g1	GAX73052.1	hypothetical protein CEUSTIGMA_g505.t1 [Chlamydomonas eustigma]	Chlamydomonas_eustigma	42.9	2.8e-23
TRINITY_DN11307_c0_g2	EEC76877.1	hypothetical protein OsI_15081 [Oryza sativa Indica Group]	Oryza_sativa	91.5	1.6e-34
TRINITY_DN11309_c0_g1	XP_015959205.1	60S ribosomal protein L9 [Arachis duranensis]	Arachis_duranensis	100	7.4e-53
TRINITY_DN11311_c0_g2	XP_024461400.1	ultraviolet-B receptor UVR8 isoform X4 [Populus trichocarpa]	Populus_trichocarpa	32.8	2.7e-29
TRINITY_DN11311_c0_g5	XP_021632689.1	ultraviolet-B receptor UVR8 [Manihot esculenta]	Manihot_esculenta	38.9	1.5e-15
TRINITY_DN11344_c0_g1	RWW82145.1	hypothetical protein BHE74_00009409, partial [Ensete ventricosum]	Ensete_ventricosum	49.5	7.9e-144
TRINITY_DN11353_c1_g1	RYR41682.1	hypothetical protein Ahy_A08g038094 isoform A [Arachis hypogaea]	Arachis_hypogaea	100	2.9e-32
TRINITY_DN11353_c1_g2	AAV34697.1	ubiquitin-conjugating enzyme [Arachis hypogaea]	Arachis_hypogaea	100	2.3e-29
TRINITY_DN11354_c1_g1	XP_002500567.1	predicted protein, partial [Micromonas commoda]	Micromonas_commoda	48.9	1.1e-33
TRINITY_DN11369_c0_g1	XP_015087561.1	glycolipid transfer protein 1 [Solanum pennellii]	Solanum_pennellii	35.1	4.3e-26
TRINITY_DN11370_c0_g1	KXZ41536.1	hypothetical protein GPECTOR_409g249 [Gonium pectorale]	Gonium_pectorale	28.7	4e-21
TRINITY_DN11373_c0_g1	PON80167.1	Dual specificity phosphatase [Parasponia andersonii]	Parasponia_andersonii	36.7	1.4e-08
TRINITY_DN11376_c0_g1	XP_007511725.1	predicted protein [Bathycoccus prasinos]	Bathycoccus_prasinos	33.5	1.8e-17
TRINITY_DN11379_c0_g1	XP_026407497.1	uncharacterized protein LOC113302769 [Papaver somniferum]	Papaver_somniferum	31	2.3e-35
TRINITY_DN1137_c0_g1	XP_024393667.1	exostosin-1 homolog [Physcomitrella patens]	Physcomitrella_patens	35.4	3.2e-09
TRINITY_DN11385_c0_g1	AFK42829.1	unknown [Lotus japonicus]	Lotus_japonicus	44.7	1.2e-71
TRINITY_DN11391_c0_g1	GAX84148.1	hypothetical protein CEUSTIGMA_g11571.t1 [Chlamydomonas eustigma]	Chlamydomonas_eustigma	30.1	6.3e-06
TRINITY_DN11394_c0_g1	XP_026454413.1	ATP synthase subunit epsilon, mitochondrial-like [Papaver somniferum]	Papaver_somniferum	48.1	5.5e-07
TRINITY_DN11396_c0_g1	XP_010047124.1	PREDICTED: 40S ribosomal protein S12 isoform X2 [Eucalyptus grandis]	Eucalyptus_grandis	62.3	2.1e-18
TRINITY_DN11399_c0_g2	OAE29098.1	hypothetical protein AXG93_3678s1050 [Marchantia polymorpha subsp. ruderalis]	Marchantia_polymorpha	40.5	1.6e-213
TRINITY_DN11404_c0_g1	RMZ53313.1	hypothetical protein APUTEX25_004801 [Auxenochlorella protothecoides]	Auxenochlorella_protothecoides	42.4	1.7e-11
TRINITY_DN11424_c0_g1	GBF98351.1	hypothetical protein Rsub_11245 [Raphidocelis subcapitata]	Raphidocelis_subcapitata	42.1	7e-15
TRINITY_DN11429_c0_g1	BAW35590.1	adenylyl cyclase with PDE domain, partial [Adiantum capillus-veneris]	Adiantum_capillus-veneris	46.6	2.1e-09
TRINITY_DN11442_c0_g1	XP_023929132.1	protein NipSnap homolog 1-like [Quercus suber]	Quercus_suber	37.7	7e-33
TRINITY_DN11468_c0_g2	XP_020578767.1	activating signal cointegrator 1 complex subunit 1-like isoform X2 [Phalaenopsis equestris]	Phalaenopsis_equestris	28.7	6.8e-30
TRINITY_DN11487_c0_g3	XP_010058894.1	PREDICTED: phenylalanine--tRNA ligase beta subunit, cytoplasmic-like isoform X1 [Eucalyptus grandis]	Eucalyptus_grandis	29.1	5.8e-16
TRINITY_DN11491_c0_g1	PSC68993.1	pyridoxal phosphate [Micractinium conductrix]	Micractinium_conductrix	39.9	9.4e-65
TRINITY_DN11505_c0_g1	BAJ21569.1	cytochrome c oxidase subunit 1, partial (mitochondrion) [Prasinococcus capsulatus]	Prasinococcus_capsulatus	65.7	5.2e-18
TRINITY_DN11506_c0_g1	EEF27536.1	hydroxyacyl dehydrogenase, putative [Ricinus communis]	Ricinus_communis	56.9	4e-72
TRINITY_DN11521_c0_g1	GAQ78363.1	Sirtuin [Klebsormidium nitens]	Klebsormidium_nitens	44	7.9e-74
TRINITY_DN11540_c0_g1	XP_020982180.1	probable galactinol--sucrose galactosyltransferase 2 [Arachis duranensis]	Arachis_duranensis	93.9	1.7e-16
TRINITY_DN11551_c0_g1	XP_016545538.1	PREDICTED: reactive Intermediate Deaminase A, chloroplastic [Capsicum annuum]	Capsicum_annuum	55	1.8e-33
TRINITY_DN11554_c0_g1	XP_027904735.1	cleavage stimulation factor subunit 50 isoform X1 [Vigna unguiculata]	Vigna_unguiculata	33.5	2.9e-12
TRINITY_DN11555_c0_g6	YP_008816057.1	apocytochrome b (mitochondrion) [Entransia fimbriata]	Entransia_fimbriata	56.8	1.3e-107
TRINITY_DN11577_c0_g2	KCW56103.1	hypothetical protein EUGRSUZ_I01857 [Eucalyptus grandis]	Eucalyptus_grandis	49	8.2e-07
TRINITY_DN11580_c0_g1	XP_016204682.1	IAA-amino acid hydrolase ILR1-like 5 [Arachis ipaensis]	Arachis_ipaensis	100	2.8e-25
TRINITY_DN11583_c0_g1	XP_020696048.1	DNA-directed RNA polymerases II, IV and V subunit 9A-like [Dendrobium catenatum]	Dendrobium_catenatum	56.3	1.4e-27
TRINITY_DN11591_c0_g2	BAJ85454.1	predicted protein [Hordeum vulgare subsp. vulgare]	Hordeum_vulgare	79.5	3.1e-66
TRINITY_DN11592_c0_g1	BAJ99731.1	predicted protein [Hordeum vulgare subsp. vulgare]	Hordeum_vulgare	47	1.6e-67
TRINITY_DN11626_c0_g1	CAZ52764.1	putative manganese superoxide dismutase protein, partial [Tetraselmis suecica]	Tetraselmis_suecica	56.8	7.1e-68
TRINITY_DN11628_c0_g2	XP_024399217.1	60S ribosomal protein L17-like [Physcomitrella patens]	Physcomitrella_patens	71.9	1.1e-54
TRINITY_DN11630_c0_g1	VDD06014.1	unnamed protein product, partial [Brassica oleracea]	Brassica_oleracea	40.6	3.7e-17
TRINITY_DN11630_c0_g2	GAQ83201.1	WD repeat-containing protein [Klebsormidium nitens]	Klebsormidium_nitens	37.1	1.3e-27
TRINITY_DN11631_c0_g1	XP_002299607.1	lys-63-specific deubiquitinase BRCC36 [Populus trichocarpa]	Populus_trichocarpa	55.6	2.4e-40
TRINITY_DN11632_c0_g1	GAQ85467.1	hypothetical protein KFL_002370010 [Klebsormidium nitens]	Klebsormidium_nitens	59.4	9.8e-48
TRINITY_DN11648_c0_g1	XP_018470805.1	PREDICTED: small ubiquitin-related modifier 1 [Raphanus sativus]	Raphanus_sativus	53.1	7e-21
TRINITY_DN11648_c0_g2	XP_020277331.1	uncharacterized protein LOC109851551 [Asparagus officinalis]	Asparagus_officinalis	42	1.3e-14
TRINITY_DN11651_c0_g1	PSC73371.1	cytochrome c-type heme lyase [Micractinium conductrix]	Micractinium_conductrix	57.6	7.8e-29
TRINITY_DN11652_c0_g2	XP_017231353.1	PREDICTED: copper chaperone for superoxide dismutase, chloroplastic/cytosolic [Daucus carota subsp. sativus]	Daucus_carota	42.5	2.8e-20
TRINITY_DN11660_c0_g1	GBG76923.1	hypothetical protein CBR_g23137 [Chara braunii]	Chara_braunii	42.7	6.6e-07
TRINITY_DN11670_c0_g1	AAQ14198.1	ribosomal protein S7 (chloroplast) [Ascarina lucida]	Ascarina_lucida	100	6.5e-32
TRINITY_DN11670_c0_g2	XP_022932068.1	uncharacterized protein LOC111438394 [Cucurbita moschata]	Cucurbita_moschata	97.9	1.1e-45
TRINITY_DN11670_c0_g3	YP_009472211.1	NADH-plastoquinone oxidoreductase subunit 1 (chloroplast) [Arachis hypogaea]	Arachis_hypogaea	100	2.8e-33
TRINITY_DN11690_c0_g1	XP_023924436.1	ER-derived vesicles protein ERV14-like [Quercus suber]	Quercus_suber	34.3	4.2e-14
TRINITY_DN11703_c0_g1	BAJ96063.1	predicted protein [Hordeum vulgare subsp. vulgare]	Hordeum_vulgare	75.6	6.8e-88
TRINITY_DN11713_c0_g1	XP_023766914.1	uncharacterized protein LOC111915488, partial [Lactuca sativa]	Lactuca_sativa	60.6	7.6e-43
TRINITY_DN11717_c0_g1	XP_024403681.1	histone-lysine N-methyltransferase ASHR1-like [Physcomitrella patens]	Physcomitrella_patens	43.1	4.5e-09
TRINITY_DN11721_c1_g1	XP_026441985.1	uncharacterized protein K02A2.6-like, partial [Papaver somniferum]	Papaver_somniferum	57.1	8.5e-24
TRINITY_DN11744_c0_g1	KXZ44735.1	hypothetical protein GPECTOR_63g60 [Gonium pectorale]	Gonium_pectorale	30	3.2e-44
TRINITY_DN11751_c0_g1	GAQ84167.1	U4/U6.U5 tri-snRNP-associated protein 3 [Klebsormidium nitens]	Klebsormidium_nitens	55.4	2.8e-06
TRINITY_DN11755_c0_g1	XP_020972379.1	protein ROS1 isoform X1 [Arachis ipaensis]	Arachis_ipaensis	95.3	1e-62
TRINITY_DN11759_c0_g1	XP_024996137.1	protein arginine N-methyltransferase 1.5 isoform X3 [Cynara cardunculus var. scolymus]	Cynara_cardunculus	48.8	8.9e-164
TRINITY_DN11761_c0_g1	XP_002508056.1	predicted protein [Micromonas commoda]	Micromonas_commoda	45.1	8.5e-43
TRINITY_DN11763_c0_g1	XP_010686671.1	PREDICTED: short-chain dehydrogenase/reductase family 42E member 1 isoform X1 [Beta vulgaris subsp. vulgaris]	Beta_vulgaris	60.7	3.6e-21
TRINITY_DN11765_c0_g2	YP_001019104.1	beta subunit of RNA polymerase [Chlorokybus atmophyticus]	Chlorokybus_atmophyticus	64.1	1.2e-30
TRINITY_DN11769_c1_g2	YP_717100.1	NADH dehydrogenase subunit 7 [Brassica napus]	Brassica_napus	100	4.3e-95
TRINITY_DN11772_c0_g2	GAX75298.1	hypothetical protein CEUSTIGMA_g2743.t1 [Chlamydomonas eustigma]	Chlamydomonas_eustigma	39.6	2.4e-55
TRINITY_DN11782_c0_g1	PRW61121.1	deleted in malignant brain tumors 1 -like [Chlorella sorokiniana]	Chlorella_sorokiniana	40.7	1.3e-08
TRINITY_DN1178_c0_g1	AAB58342.1	sex-determining region Y protein, partial [Carica papaya]	Carica_papaya	56.8	6.9e-20
TRINITY_DN11803_c0_g2	GBG71433.1	hypothetical protein CBR_g8852 [Chara braunii]	Chara_braunii	56.7	9.9e-25
TRINITY_DN11812_c0_g1	KVH95117.1	Ribosomal protein L38e, partial [Cynara cardunculus var. scolymus]	Cynara_cardunculus	37.7	5.7e-12
TRINITY_DN11825_c0_g1	AAN33000.1	alpha-tubulin 4, partial [Gossypium hirsutum]	Gossypium_hirsutum	100	8.5e-35
TRINITY_DN11832_c0_g1	PNX86812.1	hypothetical protein L195_g042894, partial [Trifolium pratense]	Trifolium_pratense	49.2	5.9e-09
TRINITY_DN11833_c0_g1	XP_023885913.1	phosphatidylserine decarboxylase proenzyme, mitochondrial-like [Quercus suber]	Quercus_suber	29.6	4e-32
TRINITY_DN11840_c1_g1	GAQ77711.1	ubiquitin-conjugating enzyme [Klebsormidium nitens]	Klebsormidium_nitens	65.2	6.9e-58
TRINITY_DN11843_c0_g1	RYQ98951.1	hypothetical protein Ahy_B07g086790 [Arachis hypogaea]	Arachis_hypogaea	100	8.1e-45
TRINITY_DN11843_c0_g2	RYQ98951.1	hypothetical protein Ahy_B07g086790 [Arachis hypogaea]	Arachis_hypogaea	100	9.8e-30
TRINITY_DN11855_c0_g3	GAQ78571.1	Transcription elongation factor [Klebsormidium nitens]	Klebsormidium_nitens	39.8	2.2e-16
TRINITY_DN11875_c0_g1	XP_024384882.1	uncharacterized protein C15orf41 homolog [Physcomitrella patens]	Physcomitrella_patens	37.4	1e-36
TRINITY_DN11879_c0_g1	XP_019445738.1	PREDICTED: 70 kDa peptidyl-prolyl isomerase-like [Lupinus angustifolius]	Lupinus_angustifolius	34.1	2.4e-67
TRINITY_DN11881_c0_g2	PNW88606.1	hypothetical protein CHLRE_01g036800v5 [Chlamydomonas reinhardtii]	Chlamydomonas_reinhardtii	30.8	6e-09
TRINITY_DN11883_c0_g2	RLM73962.1	N-acylphosphatidylethanolamine synthase isoform X2 [Panicum miliaceum]	Panicum_miliaceum	40.5	2.5e-36
TRINITY_DN11885_c0_g1	XP_024967383.1	coiled-coil domain-containing protein 94 [Cynara cardunculus var. scolymus]	Cynara_cardunculus	51.2	1.5e-43
TRINITY_DN11893_c0_g1	AAK84080.1	actin, partial [Triticum monococcum]	Triticum_monococcum	100	1.9e-36
TRINITY_DN11893_c0_g2	GBG82019.1	hypothetical protein CBR_g34199 [Chara braunii]	Chara_braunii	94.7	2.7e-49
TRINITY_DN11916_c0_g1	XP_006290797.1	vacuolar protein-sorting-associated protein 33 homolog [Capsella rubella]	Capsella_rubella	31.1	2.2e-80
TRINITY_DN11918_c0_g1	XP_023907045.1	T-complex protein 1 subunit gamma-like [Quercus suber]	Quercus_suber	67.5	1.8e-201
TRINITY_DN11920_c0_g1	GAQ85261.1	hypothetical protein KFL_002260170 [Klebsormidium nitens]	Klebsormidium_nitens	39.6	2.1e-25
TRINITY_DN11948_c0_g1	KEH27642.1	hypothetical protein MTR_5g024973 [Medicago truncatula]	Medicago_truncatula	69.6	5.5e-09
TRINITY_DN11951_c0_g1	GAX80447.1	hypothetical protein CEUSTIGMA_g7886.t1 [Chlamydomonas eustigma]	Chlamydomonas_eustigma	49	4.7e-35
TRINITY_DN11954_c0_g1	CBI16399.3	unnamed protein product, partial [Vitis vinifera]	Vitis_vinifera	100	5.8e-33
TRINITY_DN11956_c0_g1	XP_023925947.1	ubiquitin-conjugating enzyme E2-34 kDa-like [Quercus suber]	Quercus_suber	46.8	2.1e-27
TRINITY_DN11963_c0_g2	XP_005649326.1	Abi-domain-containing protein [Coccomyxa subellipsoidea C-169]	Coccomyxa_subellipsoidea	37.6	8.6e-37
TRINITY_DN11964_c0_g1	XP_006446697.1	dnaJ homolog subfamily B member 13 [Citrus clementina]	Citrus_clementina	57.5	5.1e-27
TRINITY_DN11966_c0_g1	RYQ90286.1	hypothetical protein Ahy_B09g096458 isoform B [Arachis hypogaea]	Arachis_hypogaea	98.9	8.5e-42
TRINITY_DN11970_c0_g1	GBG61851.1	hypothetical protein CBR_g23805 [Chara braunii]	Chara_braunii	58	1.2e-123
TRINITY_DN11971_c0_g2	KEH16857.1	hypothetical protein MTR_0082s0170 [Medicago truncatula]	Medicago_truncatula	65.3	1.8e-07
TRINITY_DN11971_c0_g3	AGI21882.1	cytochrome c oxidase subunit 3 (mitochondrion) [Arachis hypogaea]	Arachis_hypogaea	100	8.9e-153
TRINITY_DN11973_c0_g1	RYR17383.1	hypothetical protein Ahy_B03g062144 [Arachis hypogaea]	Arachis_hypogaea	100	7.4e-41
TRINITY_DN11985_c0_g1	XP_002502323.1	deoxyuridine 5'-triphosphate nucleotidohydrolase [Micromonas commoda]	Micromonas_commoda	69.3	4.3e-51
TRINITY_DN11991_c0_g1	XP_002948109.1	hypothetical protein VOLCADRAFT_80016 [Volvox carteri f. nagariensis]	Volvox_carteri	61.6	4.9e-143
TRINITY_DN11992_c0_g1	XP_002956754.1	pontin [Volvox carteri f. nagariensis]	Volvox_carteri	78.9	4.5e-204
TRINITY_DN11997_c0_g1	XP_002505522.1	predicted protein [Micromonas commoda]	Micromonas_commoda	60.3	3.7e-15
TRINITY_DN11998_c0_g1	XP_002500109.1	predicted protein [Micromonas commoda]	Micromonas_commoda	23.1	6.4e-08
TRINITY_DN12001_c0_g1	PRW57680.1	putative Ufm1-specific protease [Chlorella sorokiniana]	Chlorella_sorokiniana	41.2	2.6e-16
TRINITY_DN12012_c0_g1	ABF70104.1	DNA-directed RNA polymerase II 8.2 kDa polypeptide, putative [Musa balbisiana]	Musa_balbisiana	84.4	1.1e-26
TRINITY_DN12012_c0_g3	GAX73379.1	hypothetical protein CEUSTIGMA_g832.t1 [Chlamydomonas eustigma]	Chlamydomonas_eustigma	61.2	5.4e-120
TRINITY_DN12028_c0_g1	PSC76067.1	Papilin [Micractinium conductrix]	Micractinium_conductrix	36.5	2.2e-15
TRINITY_DN12033_c0_g1	XP_021852089.1	splicing factor 3B subunit 4 [Spinacia oleracea]	Spinacia_oleracea	72.2	1e-92
TRINITY_DN12042_c0_g1	BAJ87032.1	predicted protein [Hordeum vulgare subsp. vulgare]	Hordeum_vulgare	51.5	1.2e-107
TRINITY_DN12046_c0_g1	RWV78118.1	hypothetical protein GW17_00060966 [Ensete ventricosum]	Ensete_ventricosum	30.8	3.3e-39
TRINITY_DN12051_c0_g1	OTF93624.1	putative heat shock protein 70 family [Helianthus annuus]	Helianthus_annuus	34.2	6.3e-43
TRINITY_DN12079_c0_g1	XP_022846704.1	membrane magnesium transporter [Olea europaea var. sylvestris]	Olea_europaea	37.5	6.6e-08
TRINITY_DN1207_c0_g1	PRW56175.1	UDP-glucose 4-epimerase [Chlorella sorokiniana]	Chlorella_sorokiniana	45.4	1.2e-66
TRINITY_DN12084_c0_g1	XP_006845909.1	transmembrane emp24 domain-containing protein p24delta3 [Amborella trichopoda]	Amborella_trichopoda	39.8	2.6e-27
TRINITY_DN12086_c0_g1	EEF24406.1	glycerophosphoryl diester phosphodiesterase, putative [Ricinus communis]	Ricinus_communis	43.3	1.1e-08
TRINITY_DN12104_c0_g1	PON97206.1	Splicing factor-like protein [Trema orientale]	Trema_orientale	32.5	4.9e-10
TRINITY_DN12106_c1_g1	PTQ32922.1	hypothetical protein MARPO_0093s0006 [Marchantia polymorpha]	Marchantia_polymorpha	36.2	1.8e-66
TRINITY_DN12110_c0_g1	PNH06252.1	PXMP2/4 family protein 2 [Tetrabaena socialis]	Tetrabaena_socialis	35.1	1.4e-24
TRINITY_DN12114_c0_g1	XP_016202048.1	legumain [Arachis ipaensis]	Arachis_ipaensis	100	2.8e-65
TRINITY_DN12119_c0_g1	XP_010680160.1	PREDICTED: choline-phosphate cytidylyltransferase 2 [Beta vulgaris subsp. vulgaris]	Beta_vulgaris	61.6	1.3e-63
TRINITY_DN12119_c0_g2	XP_027094672.1	nuclear cap-binding protein subunit 2-like [Coffea arabica]	Coffea_arabica	67.5	2e-44
TRINITY_DN12122_c0_g1	XP_010061045.1	PREDICTED: probable diphthine methyl ester synthase [Eucalyptus grandis]	Eucalyptus_grandis	58.5	8.7e-85
TRINITY_DN12124_c0_g1	XP_016206760.1	gamma-interferon-inducible lysosomal thiol reductase [Arachis ipaensis]	Arachis_ipaensis	42.2	3.2e-38
TRINITY_DN12125_c0_g1	XP_013904302.1	hypothetical protein MNEG_2672 [Monoraphidium neglectum]	Monoraphidium_neglectum	31.2	2.4e-08
TRINITY_DN12142_c0_g1	XP_004978944.1	uncharacterized protein LOC101754555 [Setaria italica]	Setaria_italica	30.3	3.7e-12
TRINITY_DN12148_c0_g1	GAY41251.1	hypothetical protein CUMW_058020 [Citrus unshiu]	Citrus_unshiu	25.9	1.7e-28
TRINITY_DN12161_c0_g1	ATG70791.1	ATCCH1 fatty acid oxygenation upregulated 2 [Calocedrus decurrens]	Calocedrus_decurrens	23.2	1.8e-30
TRINITY_DN12163_c0_g1	XP_023877460.1	pyruvate dehydrogenase E1 component subunit alpha, mitochondrial-like [Quercus suber]	Quercus_suber	54.5	5.5e-100
TRINITY_DN12166_c0_g1	GBG61400.1	hypothetical protein CBR_g20431 [Chara braunii]	Chara_braunii	44.9	7.5e-11
TRINITY_DN12171_c0_g1	XP_022157782.1	ubiquitin-conjugating enzyme E2 11-like [Momordica charantia]	Momordica_charantia	42.4	4.3e-28
TRINITY_DN12192_c0_g1	GAQ80628.1	mitochondrail-like 3-methylcrotonyl-CoA carboxylase beta chain [Klebsormidium nitens]	Klebsormidium_nitens	64.5	3.2e-201
TRINITY_DN12193_c0_g1	XP_026441985.1	uncharacterized protein K02A2.6-like, partial [Papaver somniferum]	Papaver_somniferum	51.3	2.1e-15
TRINITY_DN12197_c0_g1	XP_024529345.1	methyltransferase-like protein 14 homolog [Selaginella moellendorffii]	Selaginella_moellendorffii	58.6	2.2e-82
TRINITY_DN12203_c0_g1	PTQ27123.1	hypothetical protein MARPO_0218s0003 [Marchantia polymorpha]	Marchantia_polymorpha	31.8	1.3e-11
TRINITY_DN12206_c0_g1	GAQ80652.1	hypothetical protein KFL_000590040 [Klebsormidium nitens]	Klebsormidium_nitens	44.7	4.8e-10
TRINITY_DN12206_c0_g2	XP_024022798.1	dihydroceramide fatty acyl 2-hydroxylase FAH1-like [Morus notabilis]	Morus_notabilis	44.5	2.7e-53
TRINITY_DN12213_c0_g1	XP_023873025.1	probable RNA-binding protein sce3 [Quercus suber]	Quercus_suber	39.3	5.8e-14
TRINITY_DN12214_c0_g1	GAX76126.1	hypothetical protein CEUSTIGMA_g3569.t1 [Chlamydomonas eustigma]	Chlamydomonas_eustigma	35.1	6.5e-14
TRINITY_DN12218_c0_g1	GAQ82787.1	phosphopantetheine adenylyltransferase / dephospho-CoA kinase [Klebsormidium nitens]	Klebsormidium_nitens	36.7	4e-29
TRINITY_DN12221_c0_g1	GAQ84563.1	hypothetical protein KFL_001940200 [Klebsormidium nitens]	Klebsormidium_nitens	30.9	4.3e-28
TRINITY_DN12224_c0_g2	XP_011041233.1	PREDICTED: BTB/POZ domain-containing protein At2g30600-like [Populus euphratica]	Populus_euphratica	22.6	4.2e-08
TRINITY_DN12225_c0_g1	XP_003079335.1	Small GTPase superfamily, Rab type [Ostreococcus tauri]	Ostreococcus_tauri	51.5	2.3e-52
TRINITY_DN12234_c0_g3	XP_011399690.1	Ubiquitin-conjugating enzyme E2 variant 1C [Auxenochlorella protothecoides]	Auxenochlorella_protothecoides	62.2	1.9e-27
TRINITY_DN12243_c0_g1	RYQ87258.1	hypothetical protein Ahy_B09g094738 [Arachis hypogaea]	Arachis_hypogaea	97.4	5.7e-13
TRINITY_DN12247_c0_g1	EPS65075.1	hypothetical protein M569_09704 [Genlisea aurea]	Genlisea_aurea	35.6	1.1e-37
TRINITY_DN12258_c0_g1	PNW81851.1	hypothetical protein CHLRE_06g263150v5 [Chlamydomonas reinhardtii]	Chlamydomonas_reinhardtii	31.4	1.7e-42
TRINITY_DN12269_c0_g1	XP_011089580.1	ribonuclease 2 [Sesamum indicum]	Sesamum_indicum	40.2	1.1e-13
TRINITY_DN12277_c0_g1	GAQ82360.1	strictosidine synthase [Klebsormidium nitens]	Klebsormidium_nitens	38.3	3.6e-52
TRINITY_DN12281_c0_g1	GAQ87413.1	hypothetical protein KFL_003510070 [Klebsormidium nitens]	Klebsormidium_nitens	43.1	1.4e-06
TRINITY_DN12284_c0_g1	XP_027084482.1	copper transporter 5-like [Coffea arabica]	Coffea_arabica	35.7	9.3e-09
TRINITY_DN12285_c0_g1	KZV47531.1	hypothetical protein F511_33271 [Dorcoceras hygrometricum]	Dorcoceras_hygrometricum	82.7	6.2e-59
TRINITY_DN12292_c0_g3	GAQ90479.1	KRAB-A domain-containing protein [Klebsormidium nitens]	Klebsormidium_nitens	45.1	1.4e-25
TRINITY_DN12301_c0_g1	XP_024029426.1	eukaryotic translation initiation factor 5A-4 isoform X1 [Morus notabilis]	Morus_notabilis	100	1e-53
TRINITY_DN12302_c0_g1	XP_007509786.1	predicted protein [Bathycoccus prasinos]	Bathycoccus_prasinos	39.2	3.2e-66
TRINITY_DN12313_c0_g1	XP_002501961.1	sialic-acid o-acetylesterase-like protein [Micromonas commoda]	Micromonas_commoda	33.6	4.5e-49
TRINITY_DN12319_c0_g1	XP_022865934.1	low-temperature-induced cysteine proteinase-like [Olea europaea var. sylvestris]	Olea_europaea	47.5	9.5e-06
TRINITY_DN12325_c0_g1	XP_021994769.1	RNA-binding protein Y14A-like [Helianthus annuus]	Helianthus_annuus	51.5	1.1e-32
TRINITY_DN12327_c0_g1	XP_023882539.1	GTP cyclohydrolase 1-like [Quercus suber]	Quercus_suber	49.2	5.2e-47
TRINITY_DN12330_c0_g2	EYU33633.1	hypothetical protein MIMGU_mgv1a021842mg [Erythranthe guttata]	Erythranthe_guttata	38.6	1.5e-08
TRINITY_DN12333_c0_g1	XP_024377149.1	phytepsin-like [Physcomitrella patens]	Physcomitrella_patens	41.8	3.4e-99
TRINITY_DN12343_c0_g1	RLM75076.1	putative aldo-keto reductase 2 [Panicum miliaceum]	Panicum_miliaceum	52.8	2.2e-86
TRINITY_DN12354_c0_g1	XP_005647144.1	alpha/beta-hydrolase [Coccomyxa subellipsoidea C-169]	Coccomyxa_subellipsoidea	30.8	1.1e-29
TRINITY_DN12354_c0_g2	XP_005647144.1	alpha/beta-hydrolase [Coccomyxa subellipsoidea C-169]	Coccomyxa_subellipsoidea	32.8	5.1e-34
TRINITY_DN12363_c0_g1	PNH08694.1	Dynein light chain 1, axonemal [Tetrabaena socialis]	Tetrabaena_socialis	35.4	6.3e-09
TRINITY_DN12367_c0_g2	GAQ78781.1	hypothetical protein KFL_000180630 [Klebsormidium nitens]	Klebsormidium_nitens	42	1.3e-08
TRINITY_DN12383_c0_g6	XP_027095584.1	signal recognition particle 9 kDa protein [Coffea arabica]	Coffea_arabica	53.4	6.6e-18
TRINITY_DN12386_c0_g2	XP_024523346.1	snRNA-activating protein complex subunit isoform X1 [Selaginella moellendorffii]	Selaginella_moellendorffii	38.9	1.2e-31
TRINITY_DN12388_c0_g1	XP_003080902.2	Oxoglutarate/iron-dependent dioxygenase [Ostreococcus tauri]	Ostreococcus_tauri	28.7	1.6e-15
TRINITY_DN12393_c0_g1	EFJ24224.1	hypothetical protein SELMODRAFT_102150 [Selaginella moellendorffii]	Selaginella_moellendorffii	73.5	8.1e-58
TRINITY_DN12393_c0_g2	PTQ39089.1	hypothetical protein MARPO_0047s0069 [Marchantia polymorpha]	Marchantia_polymorpha	67.4	5.7e-132
TRINITY_DN12411_c0_g1	XP_002508641.1	predicted protein [Micromonas commoda]	Micromonas_commoda	36.5	7e-51
TRINITY_DN12413_c0_g2	XP_004135605.1	PREDICTED: ER membrane protein complex subunit 6 [Cucumis sativus]	Cucumis_sativus	51	2.6e-19
TRINITY_DN12414_c0_g1	XP_016560631.1	PREDICTED: sugar transporter ERD6-like 6 [Capsicum annuum]	Capsicum_annuum	33.4	1.7e-61
TRINITY_DN12420_c0_g1	GAQ82071.1	hypothetical protein KFL_000990210 [Klebsormidium nitens]	Klebsormidium_nitens	41.1	1.7e-26
TRINITY_DN12424_c0_g1	BAV32137.1	MOTHER OF FT AND TFL1 [Symplocarpus renifolius]	Symplocarpus_renifolius	41.3	1.6e-23
TRINITY_DN12425_c0_g1	XP_004287742.1	PREDICTED: protein STRICTOSIDINE SYNTHASE-LIKE 5-like [Fragaria vesca subsp. vesca]	Fragaria_vesca	37.4	3.3e-21
TRINITY_DN12433_c0_g1	XP_024198579.1	uncharacterized protein LOC112201885 [Rosa chinensis]	Rosa_chinensis	26.9	2e-22
TRINITY_DN12436_c0_g1	XP_023896101.1	uncharacterized protein LOC112007982 [Quercus suber]	Quercus_suber	52.9	3.7e-11
TRINITY_DN12439_c0_g1	XP_016436384.1	PREDICTED: probable phosphopantothenoylcysteine decarboxylase [Nicotiana tabacum]	Nicotiana_tabacum	59.6	3e-33
TRINITY_DN12440_c0_g1	GAX78379.1	hypothetical protein CEUSTIGMA_g5821.t1 [Chlamydomonas eustigma]	Chlamydomonas_eustigma	60.9	2.6e-52
TRINITY_DN12443_c0_g1	GAQ89631.1	kinesin-related protein [Klebsormidium nitens]	Klebsormidium_nitens	52.3	8.8e-53
TRINITY_DN12452_c0_g1	PWA99008.1	NADH:ubiquinone oxidoreductase, 17.2kDa subunit [Artemisia annua]	Artemisia_annua	46.4	2.9e-16
TRINITY_DN12462_c0_g1	XP_016202159.1	cytokinin dehydrogenase 2 [Arachis ipaensis]	Arachis_ipaensis	98.9	5.4e-46
TRINITY_DN12463_c0_g1	XP_002952334.1	hypothetical protein VOLCADRAFT_105471 [Volvox carteri f. nagariensis]	Volvox_carteri	50.8	1e-28
TRINITY_DN12466_c0_g1	XP_024185006.1	flowering time control protein FPA [Rosa chinensis]	Rosa_chinensis	28	4.2e-12
TRINITY_DN12470_c0_g1	XP_017227603.1	PREDICTED: 60S ribosomal protein L23a [Daucus carota subsp. sativus]	Daucus_carota	79.8	3.1e-32
TRINITY_DN12470_c0_g3	XP_004136700.2	PREDICTED: secoisolariciresinol dehydrogenase-like [Cucumis sativus]	Cucumis_sativus	33.5	6.9e-10
TRINITY_DN12483_c0_g1	PKA51702.1	60S ribosomal protein L3 [Apostasia shenzhenica]	Apostasia_shenzhenica	56.9	1.1e-144
TRINITY_DN12487_c0_g1	XP_012858762.1	PREDICTED: mitochondrial substrate carrier family protein B-like [Erythranthe guttata]	Erythranthe_guttata	25.5	1.2e-11
TRINITY_DN12488_c0_g1	RVX09677.1	SWR1 complex subunit 6 [Vitis vinifera]	Vitis_vinifera	37.1	1.1e-14
TRINITY_DN12492_c0_g1	XP_004965724.1	phospholipase D Z isoform X1 [Setaria italica]	Setaria_italica	25.3	1.7e-28
TRINITY_DN12493_c0_g1	XP_020990156.1	uncharacterized protein LOC110277339 [Arachis duranensis]	Arachis_duranensis	99.5	9.2e-224
TRINITY_DN12493_c0_g2	XP_027336840.1	uncharacterized protein LOC113850478 [Abrus precatorius]	Abrus_precatorius	72.1	1.1e-40
TRINITY_DN12494_c0_g2	OMP14036.1	Ribosomal protein L36 [Corchorus olitorius]	Corchorus_olitorius	72.1	9.8e-09
TRINITY_DN12504_c0_g1	XP_002945988.1	hypothetical protein VOLCADRAFT_108817 [Volvox carteri f. nagariensis]	Volvox_carteri	68.6	8.8e-126
TRINITY_DN1250_c0_g1	XP_010687621.1	PREDICTED: heat shock 70 kDa protein-like [Beta vulgaris subsp. vulgaris]	Beta_vulgaris	49.5	1.5e-22
TRINITY_DN12520_c0_g3	GAX80271.1	hypothetical protein CEUSTIGMA_g7709.t1 [Chlamydomonas eustigma]	Chlamydomonas_eustigma	44.7	7.9e-15
TRINITY_DN12529_c0_g3	PTQ30681.1	hypothetical protein MARPO_0121s0029 [Marchantia polymorpha]	Marchantia_polymorpha	34.5	1.1e-10
TRINITY_DN12532_c0_g1	PTQ45565.1	hypothetical protein MARPO_0014s0097 [Marchantia polymorpha]	Marchantia_polymorpha	55	2.5e-41
TRINITY_DN12539_c0_g1	RZB66715.1	putative calcium-binding protein isoform A [Glycine soja]	Glycine_soja	33.3	1.5e-10
TRINITY_DN1253_c0_g1	XP_023925413.1	eukaryotic translation initiation factor 5A-like [Quercus suber]	Quercus_suber	61.5	1.4e-46
TRINITY_DN12541_c0_g1	GAQ86797.1	PHD zinc finger superfamily protein [Klebsormidium nitens]	Klebsormidium_nitens	64.3	2.6e-24
TRINITY_DN12541_c0_g2	GBG85317.1	hypothetical protein CBR_g39884 [Chara braunii]	Chara_braunii	59.1	4.7e-121
TRINITY_DN12543_c0_g1	XP_015944938.1	60S ribosomal protein L13-1 [Arachis duranensis]	Arachis_duranensis	100	4.8e-46
TRINITY_DN12547_c0_g1	RVW52868.1	Bidirectional sugar transporter SWEET5 [Vitis vinifera]	Vitis_vinifera	33.7	2.4e-26
TRINITY_DN12550_c0_g1	XP_023890530.1	uncharacterized protein LOC112002610 [Quercus suber]	Quercus_suber	62.4	2.2e-64
TRINITY_DN12552_c0_g1	XP_001699544.1	predicted protein [Chlamydomonas reinhardtii]	Chlamydomonas_reinhardtii	41.5	7.2e-74
TRINITY_DN12552_c0_g2	XP_005845202.1	hypothetical protein CHLNCDRAFT_137433 [Chlorella variabilis]	Chlorella_variabilis	38	9.6e-40
TRINITY_DN12553_c0_g1	XP_002948189.1	hypothetical protein VOLCADRAFT_88567 [Volvox carteri f. nagariensis]	Volvox_carteri	37.5	1.9e-08
TRINITY_DN12555_c0_g1	PTQ33204.1	hypothetical protein MARPO_0091s0055 [Marchantia polymorpha]	Marchantia_polymorpha	31.8	3.8e-29
TRINITY_DN12558_c0_g1	XP_011031936.1	PREDICTED: nudix hydrolase 8-like isoform X1 [Populus euphratica]	Populus_euphratica	40.9	1.2e-48
TRINITY_DN12571_c1_g2	XP_003083453.1	AMP-dependent synthetase/ligase [Ostreococcus tauri]	Ostreococcus_tauri	50	4.8e-10
TRINITY_DN12574_c0_g1	XP_010668829.1	PREDICTED: basic transcription factor 3-like [Beta vulgaris subsp. vulgaris]	Beta_vulgaris	29.5	7.6e-10
TRINITY_DN12574_c0_g2	XP_008801183.1	U2 small nuclear ribonucleoprotein A'-like [Phoenix dactylifera]	Phoenix_dactylifera	51.2	1.2e-49
TRINITY_DN12581_c0_g1	KZV15418.1	phenylalanine ammonia-lyase-like, partial [Dorcoceras hygrometricum]	Dorcoceras_hygrometricum	39.5	4e-81
TRINITY_DN12584_c1_g1	GAQ80611.1	myosin heavy chain-related protein [Klebsormidium nitens]	Klebsormidium_nitens	54.7	4.4e-12
TRINITY_DN12584_c1_g3	GAQ80611.1	myosin heavy chain-related protein [Klebsormidium nitens]	Klebsormidium_nitens	58.2	1.3e-38
TRINITY_DN12587_c0_g1	OAE33341.1	hypothetical protein AXG93_4123s1160 [Marchantia polymorpha subsp. ruderalis]	Marchantia_polymorpha	26.5	4e-57
TRINITY_DN12590_c0_g1	KZV42162.1	2,3-dihydro-2,3-dihydroxybenzoate dehydrogenase [Dorcoceras hygrometricum]	Dorcoceras_hygrometricum	66.7	5.1e-35
TRINITY_DN12596_c0_g1	XP_026407887.1	uncharacterized PKHD-type hydroxylase At1g22950-like [Papaver somniferum]	Papaver_somniferum	38.3	5.1e-43
TRINITY_DN12604_c0_g1	GAX79468.1	hypothetical protein CEUSTIGMA_g6909.t1 [Chlamydomonas eustigma]	Chlamydomonas_eustigma	41.6	1.3e-101
TRINITY_DN12611_c0_g1	XP_012066503.1	splicing factor U2af small subunit B [Jatropha curcas]	Jatropha_curcas	58.9	1.2e-31
TRINITY_DN12611_c0_g2	XP_023890364.1	40S ribosomal protein S21 [Quercus suber]	Quercus_suber	57.5	5.5e-21
TRINITY_DN12618_c0_g1	XP_023875394.1	UDP-N-acetylglucosamine--dolichyl-phosphate N-acetylglucosaminephosphotransferase-like [Quercus suber]	Quercus_suber	43.5	3.1e-84
TRINITY_DN12619_c0_g1	EFJ15056.1	hypothetical protein SELMODRAFT_119241 [Selaginella moellendorffii]	Selaginella_moellendorffii	43.7	1.1e-07
TRINITY_DN12625_c0_g2	XP_016734122.1	PREDICTED: p-aminobenzoyl-glutamate hydrolase subunit B-like, partial [Gossypium hirsutum]	Gossypium_hirsutum	35.3	5.5e-30
TRINITY_DN12628_c0_g1	XP_023893974.1	beta-1,3-glucan-binding protein-like [Quercus suber]	Quercus_suber	40.5	1.9e-63
TRINITY_DN12628_c0_g2	XP_023893974.1	beta-1,3-glucan-binding protein-like [Quercus suber]	Quercus_suber	39.2	2.9e-63
TRINITY_DN12631_c0_g2	XP_005643989.1	Nop53-domain-containing protein [Coccomyxa subellipsoidea C-169]	Coccomyxa_subellipsoidea	36.4	2.2e-07
TRINITY_DN12632_c0_g1	XP_001700291.1	mitogen-activated protein kinase 8 [Chlamydomonas reinhardtii]	Chlamydomonas_reinhardtii	53.4	6.6e-59
TRINITY_DN12649_c0_g1	XP_005851542.1	hypothetical protein CHLNCDRAFT_33886 [Chlorella variabilis]	Chlorella_variabilis	31.8	3.2e-22
TRINITY_DN12657_c0_g1	XP_022560014.1	BTB/POZ and MATH domain-containing protein 3-like [Brassica napus]	Brassica_napus	39.2	3e-08
TRINITY_DN12661_c0_g2	XP_010061511.1	PREDICTED: protein CutA, chloroplastic isoform X2 [Eucalyptus grandis]	Eucalyptus_grandis	49.6	8.2e-25
TRINITY_DN12666_c0_g1	PRW61221.1	ribosome maturation SBDS [Chlorella sorokiniana]	Chlorella_sorokiniana	64.2	9.4e-53
TRINITY_DN12676_c0_g1	XP_002965493.1	ER membrane protein complex subunit 2 [Selaginella moellendorffii]	Selaginella_moellendorffii	46.6	2.2e-47
TRINITY_DN12680_c0_g1	XP_008446531.1	PREDICTED: phosphate transporter PHO1 homolog 1 isoform X1 [Cucumis melo]	Cucumis_melo	30.1	7.2e-32
TRINITY_DN12689_c0_g2	OMO53574.1	Small GTPase superfamily, SAR1-type, partial [Corchorus capsularis]	Corchorus_capsularis	32	4.8e-26
TRINITY_DN12693_c0_g1	GBF91494.1	MAP kinase phosphatase [Raphidocelis subcapitata]	Raphidocelis_subcapitata	29.7	1.6e-12
TRINITY_DN12709_c0_g1	XP_010695011.1	PREDICTED: DNA repair protein XRCC3 homolog [Beta vulgaris subsp. vulgaris]	Beta_vulgaris	37.5	1.3e-36
TRINITY_DN12709_c0_g2	XP_006402782.1	lipid phosphate phosphatase delta isoform X1 [Eutrema salsugineum]	Eutrema_salsugineum	29	3.6e-19
TRINITY_DN12714_c0_g1	GBF89861.1	eukaryotic elongation factor 2 kinase [Raphidocelis subcapitata]	Raphidocelis_subcapitata	42.3	6.2e-16
TRINITY_DN12720_c0_g1	GAQ79944.1	hypothetical protein KFL_000420160 [Klebsormidium nitens]	Klebsormidium_nitens	31.4	4.1e-13
TRINITY_DN12721_c0_g1	XP_009130362.1	PREDICTED: dehydrogenase/reductase SDR family member 7-like [Brassica rapa]	Brassica_rapa	47.9	4.8e-42
TRINITY_DN12726_c0_g2	XP_023896232.1	guanine nucleotide-binding protein subunit beta-like protein [Quercus suber]	Quercus_suber	69.6	7.8e-102
TRINITY_DN12726_c0_g4	XP_006652484.1	PREDICTED: trafficking protein particle complex subunit 2-like [Oryza brachyantha]	Oryza_brachyantha	46.2	7.1e-16
TRINITY_DN12727_c0_g1	XP_027341902.1	elongation factor 2-like isoform X1 [Abrus precatorius]	Abrus_precatorius	100	2.4e-34
TRINITY_DN12727_c0_g2	RYQ95285.1	hypothetical protein Ahy_B08g090368 isoform A [Arachis hypogaea]	Arachis_hypogaea	100	1.2e-39
TRINITY_DN12728_c0_g1	XP_023902829.1	surfeit locus protein 4 homolog [Quercus suber]	Quercus_suber	40.3	3.1e-46
TRINITY_DN12743_c0_g1	XP_015966302.1	oleosin 5 [Arachis duranensis]	Arachis_duranensis	100	1.4e-42
TRINITY_DN12745_c0_g1	RWR82769.1	hypothetical protein CKAN_01150400 [Cinnamomum micranthum f. kanehirae]	Cinnamomum_micranthum	52.4	7.2e-09
TRINITY_DN12746_c0_g2	EFJ37107.1	hypothetical protein SELMODRAFT_75998 [Selaginella moellendorffii]	Selaginella_moellendorffii	39.5	4.8e-82
TRINITY_DN12748_c0_g1	XP_015935354.1	LOW QUALITY PROTEIN: seed linoleate 9S-lipoxygenase-2-like [Arachis duranensis]	Arachis_duranensis	100	1.1e-60
TRINITY_DN12748_c0_g2	AAY87057.1	13-lipoxygenase [Arachis hypogaea]	Arachis_hypogaea	100	3.1e-34
TRINITY_DN12748_c0_g3	AAY87056.1	13-lipoxygenase [Arachis hypogaea]	Arachis_hypogaea	100	6.5e-82
TRINITY_DN12748_c0_g4	ACF74340.1	lipoxygenase 2, partial [Arachis hypogaea]	Arachis_hypogaea	100	4.1e-46
TRINITY_DN12748_c0_g5	AAY87057.1	13-lipoxygenase [Arachis hypogaea]	Arachis_hypogaea	99.6	2.9e-157
TRINITY_DN12750_c0_g2	RYQ84095.1	hypothetical protein Ahy_B10g103000 [Arachis hypogaea]	Arachis_hypogaea	94	2.2e-150
TRINITY_DN12750_c0_g3	RYR46516.1	hypothetical protein Ahy_A07g032241 [Arachis hypogaea]	Arachis_hypogaea	90.5	7.3e-35
TRINITY_DN12750_c0_g4	RYR72899.1	hypothetical protein Ahy_A02g007125 [Arachis hypogaea]	Arachis_hypogaea	100	2.2e-13
TRINITY_DN12750_c0_g5	AAU25941.1	cytochrome b (mitochondrion) [Vitis vinifera]	Vitis_vinifera	99	1.9e-226
TRINITY_DN12750_c0_g8	RYQ93501.1	hypothetical protein Ahy_B09g099777 [Arachis hypogaea]	Arachis_hypogaea	98.4	4e-26
TRINITY_DN12750_c0_g9	YP_001671668.1	ATP synthase CF1 alpha subunit [Carica papaya]	Carica_papaya	100	1.5e-54
TRINITY_DN12752_c0_g1	XP_011044145.1	PREDICTED: deoxycytidylate deaminase-like isoform X2 [Populus euphratica]	Populus_euphratica	35.3	1e-23
TRINITY_DN12755_c1_g5	PNW80911.1	hypothetical protein CHLRE_07g334851v5 [Chlamydomonas reinhardtii]	Chlamydomonas_reinhardtii	55.7	2.4e-13
TRINITY_DN12756_c0_g1	AIN75608.1	flowering locus D-a [Dimocarpus longan]	Dimocarpus_longan	39.4	2.9e-06
TRINITY_DN12766_c0_g1	ESR51992.1	hypothetical protein CICLE_v10032709mg [Citrus clementina]	Citrus_clementina	26.1	5.7e-07
TRINITY_DN12767_c0_g1	XP_009794608.1	PREDICTED: histone H4 isoform X1 [Nicotiana sylvestris]	Nicotiana_sylvestris	100	8.5e-42
TRINITY_DN12774_c0_g3	XP_002535025.1	uncharacterized protein LOC8261086 [Ricinus communis]	Ricinus_communis	50.5	2.3e-10
TRINITY_DN12776_c0_g1	EEF24612.1	cytidine deaminase, putative [Ricinus communis]	Ricinus_communis	40.7	3.6e-21
TRINITY_DN12783_c0_g2	KZV14771.1	isocitrate lyase [Dorcoceras hygrometricum]	Dorcoceras_hygrometricum	56.7	2.4e-20
TRINITY_DN12783_c0_g3	KZV14771.1	isocitrate lyase [Dorcoceras hygrometricum]	Dorcoceras_hygrometricum	70.6	2.5e-45
TRINITY_DN12786_c0_g1	XP_017254122.1	PREDICTED: uncharacterized protein At2g24330-like [Daucus carota subsp. sativus]	Daucus_carota	37.2	7.7e-09
TRINITY_DN12787_c0_g1	XP_013906574.1	hypothetical protein MNEG_0392 [Monoraphidium neglectum]	Monoraphidium_neglectum	30.3	6.3e-06
TRINITY_DN12794_c0_g2	XP_002977808.1	tRNA-dihydrouridine(16/17) synthase [NAD(P)(+)]-like isoform X2 [Selaginella moellendorffii]	Selaginella_moellendorffii	51.9	1.8e-81
TRINITY_DN12799_c0_g3	XP_009386436.1	PREDICTED: AP-1 complex subunit mu-2 [Musa acuminata subsp. malaccensis]	Musa_acuminata	29.3	2.2e-18
TRINITY_DN12800_c0_g1	XP_024370381.1	probable protein S-acyltransferase 22 [Physcomitrella patens]	Physcomitrella_patens	34	5.4e-18
TRINITY_DN12806_c2_g1	OVA06023.1	Transcription factor CBF/NF-Y/archaeal histone [Macleaya cordata]	Macleaya_cordata	38.5	1.7e-09
TRINITY_DN12811_c0_g1	XP_023871143.1	ubiquitin-conjugating enzyme E2-18 kDa-like [Quercus suber]	Quercus_suber	62.8	5.8e-46
TRINITY_DN12817_c0_g1	XP_004296705.1	PREDICTED: protein CMSS1 [Fragaria vesca subsp. vesca]	Fragaria_vesca	34.8	5.5e-13
TRINITY_DN12818_c0_g2	KGN50970.1	hypothetical protein Csa_5G376270 [Cucumis sativus]	Cucumis_sativus	32	3.9e-34
TRINITY_DN12828_c0_g1	XP_002954181.1	hypothetical protein VOLCADRAFT_64471 [Volvox carteri f. nagariensis]	Volvox_carteri	43.8	2e-07
TRINITY_DN12832_c0_g1	BAJ90854.1	predicted protein [Hordeum vulgare subsp. vulgare]	Hordeum_vulgare	45.7	5.6e-12
TRINITY_DN12838_c0_g1	KXZ47406.1	hypothetical protein GPECTOR_35g844 [Gonium pectorale]	Gonium_pectorale	53.1	2.1e-08
TRINITY_DN12843_c0_g1	GBG70964.1	hypothetical protein CBR_g8264 [Chara braunii]	Chara_braunii	63.7	3.8e-191
TRINITY_DN12846_c0_g1	XP_023929170.1	ras-related C3 botulinum toxin substrate 1-like isoform X2 [Quercus suber]	Quercus_suber	44.8	9.9e-41
TRINITY_DN12847_c0_g1	XP_025621828.1	40S ribosomal protein SA-like [Arachis hypogaea]	Arachis_hypogaea	52.6	8.8e-79
TRINITY_DN12851_c0_g1	KXZ49881.1	hypothetical protein GPECTOR_19g332 [Gonium pectorale]	Gonium_pectorale	45.9	2.6e-164
TRINITY_DN12851_c0_g2	PWA80958.1	Ubiquitin-like protein Atg12 [Artemisia annua]	Artemisia_annua	34.5	1.7e-08
TRINITY_DN12856_c0_g1	XP_023883174.1	serine/threonine-protein phosphatase PP2A catalytic subunit [Quercus suber]	Quercus_suber	85.4	2.1e-80
TRINITY_DN12857_c0_g1	XP_006422242.1	proteasome subunit alpha type-2-A [Citrus clementina]	Citrus_clementina	65.2	3.1e-81
TRINITY_DN12859_c0_g1	RMZ55740.1	hypothetical protein APUTEX25_005781, partial [Auxenochlorella protothecoides]	Auxenochlorella_protothecoides	31.5	7e-21
TRINITY_DN12864_c1_g1	XP_001693901.1	selenoprotein W1 [Chlamydomonas reinhardtii]	Chlamydomonas_reinhardtii	51.8	2.8e-14
TRINITY_DN12866_c0_g1	XP_023911157.1	histidine--tRNA ligase, mitochondrial-like [Quercus suber]	Quercus_suber	55.4	2.2e-137
TRINITY_DN12869_c0_g1	ABR18116.1	unknown [Picea sitchensis]	Picea_sitchensis	77.1	2.2e-61
TRINITY_DN12871_c0_g2	PKA56114.1	putative RNA methyltransferase [Apostasia shenzhenica]	Apostasia_shenzhenica	38.1	3.1e-26
TRINITY_DN12874_c0_g1	KZV15279.1	hypothetical protein F511_09367 [Dorcoceras hygrometricum]	Dorcoceras_hygrometricum	29.4	3.8e-20
TRINITY_DN12882_c0_g1	XP_027106015.1	tubulin-folding cofactor B-like [Coffea arabica]	Coffea_arabica	44	5.8e-09
TRINITY_DN12886_c0_g1	EFJ08914.1	hypothetical protein SELMODRAFT_272099 [Selaginella moellendorffii]	Selaginella_moellendorffii	35.8	6.6e-41
TRINITY_DN12886_c0_g2	EFJ38521.1	hypothetical protein SELMODRAFT_402512 [Selaginella moellendorffii]	Selaginella_moellendorffii	40.8	3.3e-57
TRINITY_DN12889_c0_g1	XP_023909560.1	ribonucleoside-diphosphate reductase small chain-like [Quercus suber]	Quercus_suber	46.7	2.3e-85
TRINITY_DN12890_c0_g2	XP_019186827.1	PREDICTED: protein DEFECTIVE IN EXINE FORMATION 1 isoform X2 [Ipomoea nil]	Ipomoea_nil	23.6	9.8e-46
TRINITY_DN12891_c0_g2	XP_019178965.1	PREDICTED: N-acetyl-D-glucosamine kinase-like [Ipomoea nil]	Ipomoea_nil	27.7	1.2e-14
TRINITY_DN12892_c0_g1	NP_001275120.1	NADH dehydrogenase [ubiquinone] flavoprotein 1, mitochondrial-like [Solanum tuberosum]	Solanum_tuberosum	79.6	1.2e-210
TRINITY_DN12899_c0_g1	GAQ82893.1	hypothetical protein KFL_001280130 [Klebsormidium nitens]	Klebsormidium_nitens	31.6	2.1e-30
TRINITY_DN12901_c0_g1	GBG68706.1	hypothetical protein CBR_g3248 [Chara braunii]	Chara_braunii	25.2	1.2e-13
TRINITY_DN12907_c0_g1	XP_005643118.1	SFT2-domain-containing protein [Coccomyxa subellipsoidea C-169]	Coccomyxa_subellipsoidea	31.1	7.8e-08
TRINITY_DN12908_c0_g1	XP_027339908.1	katanin p60 ATPase-containing subunit A1-like [Abrus precatorius]	Abrus_precatorius	52.4	3e-124
TRINITY_DN12912_c0_g1	AFK45219.1	unknown [Lotus japonicus]	Lotus_japonicus	62.6	1.7e-75
TRINITY_DN12912_c1_g1	XP_011651293.1	PREDICTED: probable bifunctional methylthioribulose-1-phosphate dehydratase/enolase-phosphatase E1 1 [Cucumis sativus]	Cucumis_sativus	49.6	1.5e-25
TRINITY_DN12915_c0_g3	XP_010543445.1	PREDICTED: ras-related protein RABE1d-like isoform X3 [Tarenaya hassleriana]	Tarenaya_hassleriana	44.4	7.5e-38
TRINITY_DN12916_c0_g1	GAU27108.1	hypothetical protein TSUD_104170, partial [Trifolium subterraneum]	Trifolium_subterraneum	47.6	2.3e-45
TRINITY_DN12920_c0_g1	XP_023901802.1	vacuolar protein sorting-associated protein 4-like [Quercus suber]	Quercus_suber	75	6.4e-31
TRINITY_DN12922_c3_g1	ACY01934.1	hypothetical protein [Beta vulgaris]	Beta_vulgaris	50	1.7e-10
TRINITY_DN12924_c0_g1	XP_023882964.1	probable FAD synthase [Quercus suber]	Quercus_suber	38.2	3.7e-36
TRINITY_DN12925_c0_g1	GAX86357.1	hypothetical protein CEUSTIGMA_g13769.t1 [Chlamydomonas eustigma]	Chlamydomonas_eustigma	37.3	8.5e-16
TRINITY_DN12928_c0_g1	XP_017611280.1	PREDICTED: ultraviolet-B receptor UVR8-like [Gossypium arboreum]	Gossypium_arboreum	26.2	1.1e-23
TRINITY_DN12932_c0_g1	ADE77674.1	unknown [Picea sitchensis]	Picea_sitchensis	31.6	5.9e-15
TRINITY_DN12933_c0_g1	KXZ49383.1	hypothetical protein GPECTOR_21g609 [Gonium pectorale]	Gonium_pectorale	60.4	9e-51
TRINITY_DN12934_c0_g1	XP_020198760.1	uncharacterized protein LOC109784571 [Aegilops tauschii subsp. tauschii]	Aegilops_tauschii	46.9	1.8e-14
TRINITY_DN12938_c0_g1	XP_023926115.1	AP-2 complex subunit sigma [Quercus suber]	Quercus_suber	68.5	7.1e-47
TRINITY_DN12939_c0_g1	ERN13655.1	hypothetical protein AMTR_s00049p00109690 [Amborella trichopoda]	Amborella_trichopoda	41.7	2.8e-54
TRINITY_DN12939_c0_g3	XP_022726098.1	coatomer subunit delta-like [Durio zibethinus]	Durio_zibethinus	64.7	1.2e-54
TRINITY_DN12940_c0_g1	OWM85923.1	hypothetical protein CDL15_Pgr012173 [Punica granatum]	Punica_granatum	27.3	1e-06
TRINITY_DN12958_c0_g1	XP_024361460.1	transcription factor E2F8-like [Physcomitrella patens]	Physcomitrella_patens	35.2	2.9e-29
TRINITY_DN12963_c0_g2	XP_024538888.1	fatty acid amide hydrolase [Selaginella moellendorffii]	Selaginella_moellendorffii	35.2	2.7e-81
TRINITY_DN12971_c0_g1	AAA33546.1	dimeric mannose specific lectin protein precursor [Narcissus hybrid cultivar 2]	Narcissus_hybrid_cultivar	59	6.2e-23
TRINITY_DN12972_c0_g2	XP_024366090.1	uncharacterized protein LOC112277696 [Physcomitrella patens]	Physcomitrella_patens	25.5	6.7e-17
TRINITY_DN12972_c0_g4	BAJ95967.1	predicted protein [Hordeum vulgare subsp. vulgare]	Hordeum_vulgare	75.4	6.3e-43
TRINITY_DN12973_c0_g1	XP_016540275.1	PREDICTED: eukaryotic peptide chain release factor subunit 1-3 [Capsicum annuum]	Capsicum_annuum	77.2	1.7e-189
TRINITY_DN12989_c0_g3	XP_019238890.1	PREDICTED: spermatogenesis-associated protein 20-like [Nicotiana attenuata]	Nicotiana_attenuata	40.8	8.7e-12
TRINITY_DN12990_c0_g1	XP_003058736.1	chloroplast envelope protein translocase family [Micromonas pusilla CCMP1545]	Micromonas_pusilla	44.6	6.6e-20
TRINITY_DN13003_c0_g3	XP_024391232.1	mitotic checkpoint protein BUB3.2-like [Physcomitrella patens]	Physcomitrella_patens	54.3	7.6e-96
TRINITY_DN13005_c0_g1	PTQ40231.1	hypothetical protein MARPO_0041s0097 [Marchantia polymorpha]	Marchantia_polymorpha	24	2.4e-09
TRINITY_DN1300_c0_g1	XP_015962459.1	40S ribosomal protein S21-2 [Arachis duranensis]	Arachis_duranensis	100	2.6e-37
TRINITY_DN13016_c0_g1	XP_002507017.1	predicted protein, partial [Micromonas commoda]	Micromonas_commoda	35.7	9.9e-59
TRINITY_DN13019_c0_g1	KMZ57262.1	Alcohol dehydrogenase-like protein [Zostera marina]	Zostera_marina	27.8	2.7e-32
TRINITY_DN13020_c0_g1	XP_010938730.1	PREDICTED: T-complex protein 1 subunit eta [Elaeis guineensis]	Elaeis_guineensis	67.4	2e-203
TRINITY_DN13023_c0_g1	PUZ55800.1	hypothetical protein GQ55_5G240900 [Panicum hallii var. hallii]	Panicum_hallii	45.4	2.8e-32
TRINITY_DN13024_c0_g1	ESR56232.1	hypothetical protein CICLE_v10021444mg [Citrus clementina]	Citrus_clementina	36.5	4.6e-38
TRINITY_DN13026_c0_g1	XP_006443477.1	FH protein interacting protein FIP2 isoform X1 [Citrus clementina]	Citrus_clementina	56.1	1.8e-14
TRINITY_DN13027_c1_g1	XP_023877496.1	protein transport protein yif1-like [Quercus suber]	Quercus_suber	39.3	1.9e-31
TRINITY_DN13032_c0_g1	XP_002501013.1	predicted protein [Micromonas commoda]	Micromonas_commoda	69	7.3e-31
TRINITY_DN13033_c0_g1	PSC73709.1	metaxin-1 isoform X2 [Micractinium conductrix]	Micractinium_conductrix	27.9	1e-14
TRINITY_DN13034_c0_g1	RZC09476.1	Multiprotein-bridging factor 1a isoform B [Glycine soja]	Glycine_soja	34.7	2.2e-09
TRINITY_DN13035_c0_g1	GAQ92055.1	hypothetical protein KFL_009130020 [Klebsormidium nitens]	Klebsormidium_nitens	25.4	9.2e-34
TRINITY_DN13038_c0_g1	XP_023511389.1	putative phospholipid-transporting ATPase 9 isoform X2 [Cucurbita pepo subsp. pepo]	Cucurbita_pepo	47.5	7.3e-25
TRINITY_DN13040_c0_g1	XP_024366741.1	ubiquinone biosynthesis protein COQ9-B, mitochondrial-like isoform X1 [Physcomitrella patens]	Physcomitrella_patens	36.1	3.5e-36
TRINITY_DN13042_c1_g3	PRW33036.1	DNA replication licensing factor Mcm6 [Chlorella sorokiniana]	Chlorella_sorokiniana	44.7	9.7e-57
TRINITY_DN13043_c0_g3	PKA63070.1	Pre-mRNA branch site p14-like protein [Apostasia shenzhenica]	Apostasia_shenzhenica	67.2	5e-42
TRINITY_DN13044_c0_g1	EEF23161.1	conserved hypothetical protein [Ricinus communis]	Ricinus_communis	36.2	6e-16
TRINITY_DN13045_c0_g1	GAQ86989.1	casein kinase [Klebsormidium nitens]	Klebsormidium_nitens	74.2	3.2e-138
TRINITY_DN13045_c0_g2	XP_002515629.1	RNA polymerase II subunit A C-terminal domain phosphatase SSU72 [Ricinus communis]	Ricinus_communis	52.3	8.9e-50
TRINITY_DN13048_c0_g1	ACG43446.1	transcription factor E2F3 [Zea mays]	Zea_mays	39.1	5.2e-32
TRINITY_DN13054_c0_g1	PWA46710.1	hypothetical protein CTI12_AA506290 [Artemisia annua]	Artemisia_annua	70.1	9.3e-26
TRINITY_DN13055_c0_g1	XP_010031226.1	PREDICTED: putative ABC1 protein At2g40090 [Eucalyptus grandis]	Eucalyptus_grandis	38.8	2.8e-84
TRINITY_DN13056_c0_g1	XP_023905209.1	nuclear protein localization protein 4-like [Quercus suber]	Quercus_suber	43.2	2.6e-21
TRINITY_DN13064_c0_g1	PNW87542.1	hypothetical protein CHLRE_02g142200v5 [Chlamydomonas reinhardtii]	Chlamydomonas_reinhardtii	35.2	1.8e-32
TRINITY_DN13066_c0_g1	XP_005647144.1	alpha/beta-hydrolase [Coccomyxa subellipsoidea C-169]	Coccomyxa_subellipsoidea	30.1	1e-31
TRINITY_DN13076_c0_g1	BAK03068.1	predicted protein [Hordeum vulgare subsp. vulgare]	Hordeum_vulgare	36.3	4.2e-75
TRINITY_DN13076_c0_g2	XP_026407305.1	uncharacterized protein LOC113302586 [Papaver somniferum]	Papaver_somniferum	25.4	9.5e-12
TRINITY_DN13084_c0_g1	XP_006838023.1	60S ribosomal protein L19-3 [Amborella trichopoda]	Amborella_trichopoda	72.5	2.6e-64
TRINITY_DN13095_c0_g1	GAQ85804.1	Zinc finger RING-type domain containing protein [Klebsormidium nitens]	Klebsormidium_nitens	41.2	4.3e-57
TRINITY_DN13096_c0_g1	RAL48039.1	hypothetical protein DM860_017816 [Cuscuta australis]	Cuscuta_australis	80	4.4e-14
TRINITY_DN13096_c0_g15	NP_064039.2	nad5 gene product (mitochondrion) [Beta vulgaris subsp. vulgaris]	Beta_vulgaris	100	1.9e-37
TRINITY_DN13096_c0_g3	PHT25220.1	hypothetical protein CQW23_35144 [Capsicum baccatum]	Capsicum_baccatum	64.3	5.1e-06
TRINITY_DN13096_c0_g4	PHT24766.1	hypothetical protein CQW23_35562 [Capsicum baccatum]	Capsicum_baccatum	73.7	2.4e-67
TRINITY_DN13096_c0_g7	YP_005090448.1	NADH dehydrogenase subunit 5 (mitochondrion) [Millettia pinnata]	Millettia_pinnata	100	2.5e-47
TRINITY_DN13096_c0_g9	YP_002608410.1	orf145 [Vitis vinifera]	Vitis_vinifera	96.7	1.2e-43
TRINITY_DN13097_c0_g1	OAE35936.1	hypothetical protein AXG93_1278s1100 [Marchantia polymorpha subsp. ruderalis]	Marchantia_polymorpha	68.1	1.1e-51
TRINITY_DN13099_c0_g1	XP_008788024.1	calcium uniporter protein 6, mitochondrial-like [Phoenix dactylifera]	Phoenix_dactylifera	33.1	1.3e-12
TRINITY_DN1309_c0_g1	PSC69330.1	Ribosomal L37e [Micractinium conductrix]	Micractinium_conductrix	97.3	2.4e-37
TRINITY_DN13103_c0_g2	PRW56766.1	H(+) hexose cotransporter 2 [Chlorella sorokiniana]	Chlorella_sorokiniana	59.4	9.2e-66
TRINITY_DN13103_c0_g3	PRW56766.1	H(+) hexose cotransporter 2 [Chlorella sorokiniana]	Chlorella_sorokiniana	64	4.1e-51
TRINITY_DN13104_c0_g1	XP_026422614.1	purple acid phosphatase 17-like [Papaver somniferum]	Papaver_somniferum	33.4	8.6e-42
TRINITY_DN13105_c0_g1	ERN13081.1	hypothetical protein AMTR_s00040p00151890 [Amborella trichopoda]	Amborella_trichopoda	47.9	1.1e-24
TRINITY_DN13105_c0_g2	GAX77420.1	hypothetical protein CEUSTIGMA_g4865.t1 [Chlamydomonas eustigma]	Chlamydomonas_eustigma	28.2	1.3e-24
TRINITY_DN13111_c0_g2	PTQ28835.1	hypothetical protein MARPO_0153s0006 [Marchantia polymorpha]	Marchantia_polymorpha	28.9	1.5e-46
TRINITY_DN13118_c0_g2	GAQ89282.1	hypothetical protein KFL_005060090 [Klebsormidium nitens]	Klebsormidium_nitens	24	1.3e-07
TRINITY_DN13119_c1_g1	KRH17766.1	hypothetical protein GLYMA_13G013900 [Glycine max]	Glycine_max	80.8	4.4e-40
TRINITY_DN13119_c1_g2	RZB41102.1	hypothetical protein D0Y65_055488 [Glycine soja]	Glycine_soja	69.4	9.7e-07
TRINITY_DN13122_c0_g2	XP_010065515.1	PREDICTED: kinetochore protein NDC80 homolog [Eucalyptus grandis]	Eucalyptus_grandis	28.6	4.8e-11
TRINITY_DN13127_c0_g1	XP_003558832.1	PHD finger protein ING1 [Brachypodium distachyon]	Brachypodium_distachyon	75.4	7.2e-25
TRINITY_DN13129_c0_g1	XP_005649956.1	hypothetical protein COCSUDRAFT_65236 [Coccomyxa subellipsoidea C-169]	Coccomyxa_subellipsoidea	28.7	6.5e-10
TRINITY_DN13132_c0_g2	GAQ90345.1	DEAD-box ATP-dependent RNA helicase family protein [Klebsormidium nitens]	Klebsormidium_nitens	67.8	2.7e-192
TRINITY_DN13134_c0_g1	BAJ97485.1	predicted protein [Hordeum vulgare subsp. vulgare]	Hordeum_vulgare	52.9	9.6e-87
TRINITY_DN13135_c0_g1	XP_023896037.1	store-operated calcium entry-associated regulatory factor-like [Quercus suber]	Quercus_suber	46.5	7.3e-20
TRINITY_DN13144_c0_g2	XP_024383325.1	probable protein S-acyltransferase 14 [Physcomitrella patens]	Physcomitrella_patens	43.5	9.2e-11
TRINITY_DN13145_c0_g1	XP_017229734.1	PREDICTED: cyclin-H1-1 [Daucus carota subsp. sativus]	Daucus_carota	30.9	1.3e-28
TRINITY_DN13145_c0_g2	KYP77362.1	Protein yhbO, partial [Cajanus cajan]	Cajanus_cajan	46.8	4e-22
TRINITY_DN13150_c0_g1	XP_010683490.1	PREDICTED: mitochondrial import inner membrane translocase subunit TIM10 [Beta vulgaris subsp. vulgaris]	Beta_vulgaris	37.5	3e-06
TRINITY_DN13150_c1_g1	EFJ15765.1	hypothetical protein SELMODRAFT_234248 [Selaginella moellendorffii]	Selaginella_moellendorffii	34.4	1.8e-41
TRINITY_DN13151_c0_g1	XP_016734190.1	PREDICTED: zinc finger MYM-type protein 1-like [Gossypium hirsutum]	Gossypium_hirsutum	39.1	1.7e-33
TRINITY_DN13153_c1_g1	KMS94741.1	hypothetical protein BVRB_015700 [Beta vulgaris subsp. vulgaris]	Beta_vulgaris	73.2	1.2e-07
TRINITY_DN13157_c1_g1	XP_009771011.1	PREDICTED: neuferricin isoform X1 [Nicotiana sylvestris]	Nicotiana_sylvestris	42.4	2.8e-43
TRINITY_DN13159_c0_g2	XP_003062265.1	predicted protein, partial [Micromonas pusilla CCMP1545]	Micromonas_pusilla	62.2	4e-44
TRINITY_DN13161_c0_g1	XP_008385805.1	PREDICTED: kinesin-like protein KIN12B isoform X1 [Malus domestica]	Malus_domestica	27.4	1.9e-20
TRINITY_DN13166_c0_g1	XP_009599399.1	PREDICTED: glutathione S-transferase T1-like [Nicotiana tomentosiformis]	Nicotiana_tomentosiformis	39.5	2.4e-37
TRINITY_DN13166_c0_g2	PNR34740.1	hypothetical protein PHYPA_022638, partial [Physcomitrella patens]	Physcomitrella_patens	80.9	1.2e-33
TRINITY_DN13167_c0_g1	GAQ86389.1	hypothetical protein KFL_002860130 [Klebsormidium nitens]	Klebsormidium_nitens	50	4.9e-26
TRINITY_DN13168_c0_g1	RYR68827.1	hypothetical protein Ahy_A03g015298 [Arachis hypogaea]	Arachis_hypogaea	70	2.8e-19
TRINITY_DN13169_c0_g1	XP_013618291.1	PREDICTED: ER membrane protein complex subunit 4 [Brassica oleracea var. oleracea]	Brassica_oleracea	32.5	6.5e-17
TRINITY_DN13171_c1_g1	PRW20285.1	chlorophyllide a oxygenase [Chlorella sorokiniana]	Chlorella_sorokiniana	40.2	8.1e-12
TRINITY_DN13176_c0_g1	GAQ89813.1	axin-interacting protein [Klebsormidium nitens]	Klebsormidium_nitens	37.1	2.3e-34
TRINITY_DN13177_c0_g1	P54213.1	RecName: Full=Caltractin; AltName: Full=Centrin	Dunaliella_salina	65.1	5.1e-29
TRINITY_DN13179_c0_g1	BAJ91591.1	predicted protein [Hordeum vulgare subsp. vulgare]	Hordeum_vulgare	65.1	5.7e-76
TRINITY_DN13180_c0_g1	XP_008443634.1	PREDICTED: dnaJ protein homolog [Cucumis melo]	Cucumis_melo	47.8	1.6e-102
TRINITY_DN13185_c0_g3	XP_009351053.1	PREDICTED: actin-related protein 2/3 complex subunit 3-like [Pyrus x bretschneideri]	Pyrus_x_bretschneideri	53.4	5.6e-47
TRINITY_DN13187_c0_g1	GBF95850.1	disulfide isomerase-like [Raphidocelis subcapitata]	Raphidocelis_subcapitata	32.2	4.2e-55
TRINITY_DN13192_c0_g1	XP_004962420.1	ras-related protein Rab-21 [Setaria italica]	Setaria_italica	31.3	7.5e-16
TRINITY_DN13197_c0_g1	KMZ59450.1	hypothetical protein ZOSMA_68G00360, partial [Zostera marina]	Zostera_marina	23.6	8.2e-10
TRINITY_DN13198_c0_g1	XP_023926333.1	pyroglutamyl-peptidase 1-like [Quercus suber]	Quercus_suber	30.8	2.4e-14
TRINITY_DN13199_c0_g1	EEF24406.1	glycerophosphoryl diester phosphodiesterase, putative [Ricinus communis]	Ricinus_communis	42.7	1.7e-09
TRINITY_DN13205_c0_g1	XP_023522356.1	regulation of nuclear pre-mRNA domain-containing protein 1A-like [Cucurbita pepo subsp. pepo]	Cucurbita_pepo	44.4	2.2e-22
TRINITY_DN13207_c0_g1	AWI62538.1	metallothionein protein type 2a [Persea americana var. drymifolia]	Persea_americana	76.3	2.4e-11
TRINITY_DN13209_c0_g1	XP_022954805.1	aminomethyltransferase, mitochondrial [Cucurbita moschata]	Cucurbita_moschata	52.1	1.2e-101
TRINITY_DN1320_c0_g1	XP_015960771.1	metallothionein-like protein 2 [Arachis duranensis]	Arachis_duranensis	100	2.7e-28
TRINITY_DN13211_c0_g1	RWR86158.1	BEL1-like homeodomain-containing protein [Cinnamomum micranthum f. kanehirae]	Cinnamomum_micranthum	52.9	3.3e-06
TRINITY_DN13215_c0_g1	XP_003063187.1	predicted protein [Micromonas pusilla CCMP1545]	Micromonas_pusilla	58.7	1.3e-69
TRINITY_DN13217_c0_g2	XP_027068927.1	TBC1 domain family member 15-like isoform X1 [Coffea arabica]	Coffea_arabica	32.9	6.3e-22
TRINITY_DN13217_c0_g3	XP_003064724.1	predicted protein [Micromonas pusilla CCMP1545]	Micromonas_pusilla	42.8	6.3e-30
TRINITY_DN13218_c0_g1	RYR45712.1	hypothetical protein Ahy_A07g031518 isoform A [Arachis hypogaea]	Arachis_hypogaea	88.6	2.4e-36
TRINITY_DN13218_c0_g2	RYQ86578.1	hypothetical protein Ahy_B10g106242 [Arachis hypogaea]	Arachis_hypogaea	64.4	2.8e-18
TRINITY_DN13218_c0_g3	RZB86067.1	hypothetical protein D0Y65_026221 [Glycine soja]	Glycine_soja	67.1	4.3e-20
TRINITY_DN13219_c0_g2	XP_023905281.1	peflin-like [Quercus suber]	Quercus_suber	41.7	1e-31
TRINITY_DN13225_c0_g1	XP_020254775.1	superoxide dismutase [Cu-Zn] 2 [Asparagus officinalis]	Asparagus_officinalis	63.1	3.4e-24
TRINITY_DN13225_c0_g3	XP_020254775.1	superoxide dismutase [Cu-Zn] 2 [Asparagus officinalis]	Asparagus_officinalis	67.1	2.7e-21
TRINITY_DN13225_c0_g4	EOY10637.1	Copper/zinc superoxide dismutase 1 [Theobroma cacao]	Theobroma_cacao	56.9	2.1e-17
TRINITY_DN13228_c0_g1	BAK02869.1	predicted protein [Hordeum vulgare subsp. vulgare]	Hordeum_vulgare	51.2	7.3e-41
TRINITY_DN13231_c0_g1	PRW57244.1	archease-like [Chlorella sorokiniana]	Chlorella_sorokiniana	57.6	1.1e-38
TRINITY_DN13233_c0_g2	GAX76630.1	hypothetical protein CEUSTIGMA_g4076.t1 [Chlamydomonas eustigma]	Chlamydomonas_eustigma	55.8	2.4e-102
TRINITY_DN13236_c0_g1	XP_015877069.1	serine/arginine-rich splicing factor RS2Z32-like isoform X1 [Ziziphus jujuba]	Ziziphus_jujuba	49.4	6.3e-14
TRINITY_DN13236_c0_g2	GAQ77658.1	hypothetical protein KFL_000020190 [Klebsormidium nitens]	Klebsormidium_nitens	40.3	1.7e-14
TRINITY_DN13239_c0_g2	PRW60100.1	adenosine deaminase [Chlorella sorokiniana]	Chlorella_sorokiniana	29.4	2.2e-25
TRINITY_DN13246_c0_g1	RYR22192.1	hypothetical protein Ahy_B03g067469 isoform B [Arachis hypogaea]	Arachis_hypogaea	100	2.7e-22
TRINITY_DN13246_c0_g2	RYR42392.1	hypothetical protein Ahy_A08g038864 [Arachis hypogaea]	Arachis_hypogaea	94.7	2.3e-79
TRINITY_DN13247_c0_g1	ACF85961.1	unknown [Zea mays]	Zea_mays	60.1	2.4e-93
TRINITY_DN13248_c0_g2	PWA58123.1	ARM REPEAT PROTEIN INTERACTING WITH ABF2 [Artemisia annua]	Artemisia_annua	30.1	2.6e-16
TRINITY_DN13249_c2_g9	BAK00460.1	predicted protein [Hordeum vulgare subsp. vulgare]	Hordeum_vulgare	76.9	1.8e-34
TRINITY_DN13251_c0_g1	XP_023886556.1	adenylosuccinate lyase-like [Quercus suber]	Quercus_suber	41.3	1.1e-84
TRINITY_DN13258_c0_g1	PSC72034.1	plancitoxin-1 isoform X2 [Micractinium conductrix]	Micractinium_conductrix	33	1.1e-34
TRINITY_DN13260_c0_g1	PSR85270.1	Serine/threonine-protein phosphatase PP-X isozyme [Actinidia chinensis var. chinensis]	Actinidia_chinensis	88.4	3.2e-87
TRINITY_DN13261_c0_g1	XP_005848463.1	hypothetical protein CHLNCDRAFT_35098 [Chlorella variabilis]	Chlorella_variabilis	44.3	5.9e-48
TRINITY_DN13263_c0_g1	GBG00472.1	peptidyl-prolyl cis-trans isomerase-like [Raphidocelis subcapitata]	Raphidocelis_subcapitata	42.7	6.5e-23
TRINITY_DN13266_c0_g1	XP_017645616.1	PREDICTED: probable eukaryotic translation initiation factor 5-1 [Gossypium arboreum]	Gossypium_arboreum	65.2	2e-34
TRINITY_DN13271_c0_g1	OAE19928.1	hypothetical protein AXG93_1520s1010 [Marchantia polymorpha subsp. ruderalis]	Marchantia_polymorpha	41.6	1.6e-28
TRINITY_DN13273_c0_g1	OTG17880.1	putative ribosomal protein S5/Elongation factor G/III/V family protein [Helianthus annuus]	Helianthus_annuus	33	9.9e-43
TRINITY_DN13274_c0_g1	XP_027193456.1	E3 ubiquitin-protein ligase MBR2-like isoform X3 [Cicer arietinum]	Cicer_arietinum	34.4	2.5e-10
TRINITY_DN13282_c0_g2	XP_008441398.1	PREDICTED: mannose-1-phosphate guanylyltransferase 1 [Cucumis melo]	Cucumis_melo	61.2	6.3e-114
TRINITY_DN13287_c0_g1	GAX81354.1	hypothetical protein CEUSTIGMA_g8785.t1 [Chlamydomonas eustigma]	Chlamydomonas_eustigma	86.7	2e-87
TRINITY_DN13290_c0_g1	XP_024522832.1	alpha-xylosidase 1-like isoform X1 [Selaginella moellendorffii]	Selaginella_moellendorffii	48.9	1.4e-13
TRINITY_DN13292_c0_g1	PNH03937.1	hypothetical protein TSOC_009970 [Tetrabaena socialis]	Tetrabaena_socialis	27.1	7.2e-12
TRINITY_DN13296_c0_g3	XP_013901281.1	deoxyhypusine monooxygenase [Monoraphidium neglectum]	Monoraphidium_neglectum	42.6	3.7e-56
TRINITY_DN13303_c1_g1	BAJ85104.1	predicted protein [Hordeum vulgare subsp. vulgare]	Hordeum_vulgare	84.8	2.1e-129
TRINITY_DN13303_c1_g3	GBF96504.1	hypothetical protein Rsub_09846 [Raphidocelis subcapitata]	Raphidocelis_subcapitata	46.9	1e-96
TRINITY_DN13307_c0_g1	BAK02748.1	predicted protein [Hordeum vulgare subsp. vulgare]	Hordeum_vulgare	47.1	3.7e-115
TRINITY_DN13316_c0_g4	XP_003059384.1	predicted protein [Micromonas pusilla CCMP1545]	Micromonas_pusilla	27.5	1.5e-06
TRINITY_DN13316_c0_g8	OEL28157.1	BTB/POZ and MATH domain-containing protein 2 [Dichanthelium oligosanthes]	Dichanthelium_oligosanthes	59.3	8.1e-10
TRINITY_DN13319_c0_g1	GBG62736.1	hypothetical protein CBR_g31753 [Chara braunii]	Chara_braunii	26	8.3e-16
TRINITY_DN13321_c0_g1	RYQ79603.1	hypothetical protein Ahy_Scaffold3g107696 [Arachis hypogaea]	Arachis_hypogaea	91.4	1.5e-100
TRINITY_DN13324_c0_g1	XP_022926789.1	phosphoglycolate phosphatase 2-like [Cucurbita moschata]	Cucurbita_moschata	43.5	3e-52
TRINITY_DN13325_c0_g1	XP_019150285.1	PREDICTED: alpha-ketoglutarate-dependent dioxygenase alkB [Ipomoea nil]	Ipomoea_nil	31	1.3e-36
TRINITY_DN13328_c0_g2	XP_015085679.1	putative elongation of fatty acids protein DDB_G0272012 [Solanum pennellii]	Solanum_pennellii	29.8	2.6e-13
TRINITY_DN13333_c1_g1	XP_005648781.1	hypothetical protein COCSUDRAFT_47198 [Coccomyxa subellipsoidea C-169]	Coccomyxa_subellipsoidea	27.9	2.3e-17
TRINITY_DN13333_c2_g1	XP_020252132.1	uncharacterized zinc finger protein At4g06634-like [Asparagus officinalis]	Asparagus_officinalis	48.3	5.3e-07
TRINITY_DN13333_c2_g2	XP_023921190.1	mitochondrial import inner membrane translocase subunit tim50-like [Quercus suber]	Quercus_suber	37.1	4.6e-40
TRINITY_DN13333_c3_g2	XP_005851182.1	hypothetical protein CHLNCDRAFT_13270, partial [Chlorella variabilis]	Chlorella_variabilis	53.2	2.8e-12
TRINITY_DN13334_c0_g4	GBG80403.1	hypothetical protein CBR_g30868 [Chara braunii]	Chara_braunii	36.1	2.5e-10
TRINITY_DN13336_c0_g1	XP_021976751.1	HVA22-like protein k [Helianthus annuus]	Helianthus_annuus	46	9.1e-19
TRINITY_DN13337_c0_g1	XP_010667245.1	PREDICTED: uncharacterized protein LOC104884313 isoform X1 [Beta vulgaris subsp. vulgaris]	Beta_vulgaris	39.4	3.2e-20
TRINITY_DN13337_c0_g2	ACN41173.1	unknown [Picea sitchensis]	Picea_sitchensis	27.9	1.3e-22
TRINITY_DN13338_c0_g1	XP_010929374.1	PREDICTED: 7-dehydrocholesterol reductase [Elaeis guineensis]	Elaeis_guineensis	45.5	8.4e-125
TRINITY_DN13340_c1_g2	ABD63162.1	RNase H family protein [Asparagus officinalis]	Asparagus_officinalis	33.1	1.8e-12
TRINITY_DN13347_c0_g1	RWW91007.1	hypothetical protein BHE74_00000125 [Ensete ventricosum]	Ensete_ventricosum	47.6	3.6e-32
TRINITY_DN13350_c0_g1	XP_001690160.1	predicted protein, partial [Chlamydomonas reinhardtii]	Chlamydomonas_reinhardtii	35.4	1.2e-28
TRINITY_DN13351_c0_g2	EXC10888.1	hypothetical protein L484_002552 [Morus notabilis]	Morus_notabilis	77.7	4.7e-68
TRINITY_DN13354_c0_g6	PLY85792.1	hypothetical protein LSAT_0X46340 [Lactuca sativa]	Lactuca_sativa	69.2	1e-70
TRINITY_DN13354_c0_g7	XP_010923329.1	PREDICTED: hydroxyproline O-galactosyltransferase GALT6-like [Elaeis guineensis]	Elaeis_guineensis	29.8	2.2e-21
TRINITY_DN13358_c0_g1	XP_018457023.1	PREDICTED: putative E3 ubiquitin-protein ligase RING1a [Raphanus sativus]	Raphanus_sativus	51.2	1.5e-18
TRINITY_DN13360_c0_g1	PTQ41764.1	hypothetical protein MARPO_0033s0152 [Marchantia polymorpha]	Marchantia_polymorpha	36.3	8.3e-57
TRINITY_DN13361_c0_g1	XP_015954497.1	glyceraldehyde-3-phosphate dehydrogenase GAPC2, cytosolic [Arachis duranensis]	Arachis_duranensis	100	7.7e-69
TRINITY_DN13361_c0_g3	RYQ83032.1	hypothetical protein Ahy_B10g101646 [Arachis hypogaea]	Arachis_hypogaea	100	4.8e-32
TRINITY_DN13362_c0_g1	XP_024358094.1	uncharacterized protein LOC112273477 isoform X2 [Physcomitrella patens]	Physcomitrella_patens	34.4	4.3e-10
TRINITY_DN13363_c0_g1	XP_021714825.1	probable U3 small nucleolar RNA-associated protein 11 [Chenopodium quinoa]	Chenopodium_quinoa	41.9	1.5e-36
TRINITY_DN13365_c0_g2	AAT58731.1	putative phosphatidylserine synthase [Oryza sativa Japonica Group]	Oryza_sativa	36.5	3.2e-71
TRINITY_DN13366_c0_g1	PWA58123.1	ARM REPEAT PROTEIN INTERACTING WITH ABF2 [Artemisia annua]	Artemisia_annua	34.4	8.2e-12
TRINITY_DN13369_c1_g1	XP_024385241.1	lon protease homolog 2, peroxisomal-like isoform X1 [Physcomitrella patens]	Physcomitrella_patens	34.9	1e-65
TRINITY_DN13369_c1_g5	GAQ77993.1	Peptide methionine sulfoxide reductase [Klebsormidium nitens]	Klebsormidium_nitens	39.3	1.2e-30
TRINITY_DN13369_c1_g6	BAV58192.1	H/ACA ribonucleoprotein complex subunit 3 [Ulva partita]	Ulva_partita	75	8.1e-22
TRINITY_DN13371_c0_g1	GAX80623.1	hypothetical protein CEUSTIGMA_g8058.t1 [Chlamydomonas eustigma]	Chlamydomonas_eustigma	34.9	8.3e-09
TRINITY_DN13375_c0_g1	XP_002501986.1	predicted protein [Micromonas commoda]	Micromonas_commoda	43.8	9.2e-15
TRINITY_DN13375_c0_g4	XP_024368427.1	DIS3-like exonuclease 2 [Physcomitrella patens]	Physcomitrella_patens	42.8	5.1e-67
TRINITY_DN13377_c0_g3	XP_024532429.1	beta-galactosidase 8 [Selaginella moellendorffii]	Selaginella_moellendorffii	43.9	2.1e-137
TRINITY_DN13378_c0_g2	KNA07093.1	hypothetical protein SOVF_175100 [Spinacia oleracea]	Spinacia_oleracea	47	3.9e-08
TRINITY_DN13379_c0_g2	OMP08014.1	Phosphoserine phosphatase SerB [Corchorus olitorius]	Corchorus_olitorius	54.1	1.4e-34
TRINITY_DN13380_c0_g2	PRW56290.1	CHY zinc finger [Chlorella sorokiniana]	Chlorella_sorokiniana	31.7	9e-35
TRINITY_DN13380_c0_g3	EFH50502.1	CYP71B14 [Arabidopsis lyrata subsp. lyrata]	Arabidopsis_lyrata	36.8	1.1e-10
TRINITY_DN13381_c0_g1	XP_016734157.1	PREDICTED: uncharacterized protein K02A2.6-like, partial [Gossypium hirsutum]	Gossypium_hirsutum	30.7	5.4e-75
TRINITY_DN13392_c0_g1	PTQ28422.1	hypothetical protein MARPO_0164s0016 [Marchantia polymorpha]	Marchantia_polymorpha	47.5	5.9e-180
TRINITY_DN13398_c0_g1	PNR28526.1	hypothetical protein PHYPA_029118 [Physcomitrella patens]	Physcomitrella_patens	24.8	3.8e-10
TRINITY_DN13401_c0_g5	XP_026411972.1	serine/arginine-rich splicing factor RS31-like [Papaver somniferum]	Papaver_somniferum	36.5	5.4e-07
TRINITY_DN13405_c0_g1	XP_023923782.1	uncharacterized protein YMR196W-like [Quercus suber]	Quercus_suber	47	6e-94
TRINITY_DN13406_c0_g1	RLN00896.1	hypothetical protein C2845_PM06G08250 [Panicum miliaceum]	Panicum_miliaceum	51.4	2e-19
TRINITY_DN13413_c0_g1	RWR79233.1	receptor region, transmembrane domain- and RING domain-containing protein 1 [Cinnamomum micranthum f. kanehirae]	Cinnamomum_micranthum	44.6	8.9e-13
TRINITY_DN13415_c0_g1	XP_005651955.1	ATP synthase-like protein O subunit, mitochondrial precursor [Coccomyxa subellipsoidea C-169]	Coccomyxa_subellipsoidea	38.3	2.2e-21
TRINITY_DN13416_c0_g1	XP_022134816.1	E3 ubiquitin-protein ligase ORTHRUS 2-like isoform X1 [Momordica charantia]	Momordica_charantia	32.8	7.1e-55
TRINITY_DN13425_c2_g11	PHT25526.1	hypothetical protein CQW23_34849 [Capsicum baccatum]	Capsicum_baccatum	90.1	2.7e-61
TRINITY_DN13425_c2_g3	RYR09561.1	hypothetical protein Ahy_B05g077921 [Arachis hypogaea]	Arachis_hypogaea	100	1.1e-35
TRINITY_DN13425_c2_g4	XP_002959387.1	hypothetical protein VOLCADRAFT_84876 [Volvox carteri f. nagariensis]	Volvox_carteri	61.5	1.1e-14
TRINITY_DN13425_c2_g6	KEH22088.1	hypothetical protein MTR_7g031847 [Medicago truncatula]	Medicago_truncatula	75.9	2.3e-29
TRINITY_DN13425_c2_g7	KEH22088.1	hypothetical protein MTR_7g031847 [Medicago truncatula]	Medicago_truncatula	64.4	1e-09
TRINITY_DN13425_c2_g8	KEH22088.1	hypothetical protein MTR_7g031847 [Medicago truncatula]	Medicago_truncatula	54.2	2.1e-06
TRINITY_DN13426_c1_g1	GAQ79123.1	hypothetical protein KFL_000240530 [Klebsormidium nitens]	Klebsormidium_nitens	41.2	4.8e-12
TRINITY_DN13427_c0_g1	RWR79812.1	nascent polypeptide-associated complex subunit alpha-like protein 1 [Cinnamomum micranthum f. kanehirae]	Cinnamomum_micranthum	57.8	2.1e-29
TRINITY_DN13428_c0_g1	XP_002505472.1	predicted protein [Micromonas commoda]	Micromonas_commoda	56.9	6.8e-143
TRINITY_DN13429_c0_g2	BAK00754.1	predicted protein [Hordeum vulgare subsp. vulgare]	Hordeum_vulgare	43.2	7.8e-20
TRINITY_DN13432_c0_g5	OMO82229.1	Alpha carbonic anhydrase [Corchorus capsularis]	Corchorus_capsularis	30.3	1.4e-15
TRINITY_DN13439_c0_g1	AOS49624.1	hypothetical protein [Davallia tyermannii]	Davallia_tyermannii	36.5	5.5e-11
TRINITY_DN13439_c0_g3	XP_023892253.1	cell division control protein 3-like [Quercus suber]	Quercus_suber	54.4	2.8e-87
TRINITY_DN13439_c0_g4	KJB57626.1	hypothetical protein B456_009G172700 [Gossypium raimondii]	Gossypium_raimondii	60.9	9.6e-22
TRINITY_DN13444_c2_g1	KMZ62850.1	Nucleotidase-like protein [Zostera marina]	Zostera_marina	34.5	3.4e-78
TRINITY_DN13451_c3_g1	XP_010260286.1	PREDICTED: serine/threonine-protein kinase 4-like isoform X1 [Nelumbo nucifera]	Nelumbo_nucifera	71.6	1.3e-29
TRINITY_DN13451_c3_g5	XP_023890536.1	serine/threonine-protein kinase 3-like [Quercus suber]	Quercus_suber	45.3	1.8e-24
TRINITY_DN13452_c0_g4	ADE77554.1	unknown [Picea sitchensis]	Picea_sitchensis	32.5	4.5e-18
TRINITY_DN13452_c0_g5	XP_020684844.1	uncharacterized protein At5g39865 [Dendrobium catenatum]	Dendrobium_catenatum	41.1	5.7e-33
TRINITY_DN13452_c0_g9	XP_003057715.1	predicted protein [Micromonas pusilla CCMP1545]	Micromonas_pusilla	38.1	1.4e-09
TRINITY_DN13452_c1_g1	GBG74222.1	hypothetical protein CBR_g17934 [Chara braunii]	Chara_braunii	54.2	3.1e-140
TRINITY_DN13452_c1_g3	XP_023888893.1	transcription-associated protein 1-like [Quercus suber]	Quercus_suber	42.2	5.2e-48
TRINITY_DN13453_c0_g17	XP_014524537.1	uncharacterized protein K02A2.6-like, partial [Vigna radiata var. radiata]	Vigna_radiata	46.3	6.9e-26
TRINITY_DN13453_c0_g6	ABK22103.1	unknown [Picea sitchensis]	Picea_sitchensis	37.4	3e-37
TRINITY_DN13454_c0_g1	BAK03519.1	predicted protein [Hordeum vulgare subsp. vulgare]	Hordeum_vulgare	85.6	9.8e-50
TRINITY_DN13454_c2_g1	BAJ89001.1	predicted protein [Hordeum vulgare subsp. vulgare]	Hordeum_vulgare	97.4	8.9e-246
TRINITY_DN13454_c2_g2	BAK03519.1	predicted protein [Hordeum vulgare subsp. vulgare]	Hordeum_vulgare	100	1.7e-09
TRINITY_DN13455_c0_g1	GAQ85610.1	Nucleolar GTP-binding protein [Klebsormidium nitens]	Klebsormidium_nitens	53	1.6e-180
TRINITY_DN13463_c0_g2	XP_023910152.1	vacuolar protein sorting/targeting protein 10-like [Quercus suber]	Quercus_suber	25.6	5.7e-27
TRINITY_DN13467_c0_g1	XP_001700799.1	predicted protein [Chlamydomonas reinhardtii]	Chlamydomonas_reinhardtii	32.5	9.3e-21
TRINITY_DN13471_c0_g5	RYQ94214.1	hypothetical protein Ahy_B08g089096 isoform B [Arachis hypogaea]	Arachis_hypogaea	52.1	3.2e-82
TRINITY_DN13471_c1_g1	XP_027160894.1	LAG1 longevity assurance homolog 2 isoform X2 [Coffea eugenioides]	Coffea_eugenioides	34.1	3.6e-28
TRINITY_DN13472_c0_g1	XP_024987213.1	trafficking protein particle complex subunit 12-like [Cynara cardunculus var. scolymus]	Cynara_cardunculus	25.7	3.8e-17
TRINITY_DN13472_c1_g1	PRW18407.1	glucosamine 6-phosphate N-acetyltransferase [Chlorella sorokiniana]	Chlorella_sorokiniana	47.8	8.8e-29
TRINITY_DN13474_c0_g1	EPS71154.1	calmodulin, partial [Genlisea aurea]	Genlisea_aurea	40.3	3.6e-19
TRINITY_DN13475_c0_g3	XP_023896369.1	GTP-binding protein 1-like [Quercus suber]	Quercus_suber	40.8	6.8e-85
TRINITY_DN13480_c3_g1	PTQ34000.1	hypothetical protein MARPO_0084s0064, partial [Marchantia polymorpha]	Marchantia_polymorpha	48.3	7.9e-08
TRINITY_DN13480_c3_g3	GAQ78566.1	putative protease [Klebsormidium nitens]	Klebsormidium_nitens	59.3	7.8e-24
TRINITY_DN13486_c0_g1	GBG93423.1	hypothetical protein CBR_g69680, partial [Chara braunii]	Chara_braunii	39.7	9.3e-28
TRINITY_DN13488_c0_g1	XP_009351296.1	PREDICTED: serine/threonine-protein phosphatase 2B catalytic subunit alpha isoform-like [Pyrus x bretschneideri]	Pyrus_x_bretschneideri	41.8	1.5e-61
TRINITY_DN13489_c3_g1	PTQ47457.1	hypothetical protein MARPO_0008s0208 [Marchantia polymorpha]	Marchantia_polymorpha	52.8	1.4e-181
TRINITY_DN13489_c4_g3	XP_022745558.1	FACT complex subunit SPT16-like [Durio zibethinus]	Durio_zibethinus	48.3	4.5e-73
TRINITY_DN13489_c4_g4	OAE24435.1	hypothetical protein AXG93_522s1060 [Marchantia polymorpha subsp. ruderalis]	Marchantia_polymorpha	34.5	5.6e-90
TRINITY_DN13492_c0_g1	XP_021909905.1	purple acid phosphatase 3-like [Carica papaya]	Carica_papaya	32.5	6.3e-38
TRINITY_DN13492_c0_g2	PTQ31093.1	hypothetical protein MARPO_0115s0017 [Marchantia polymorpha]	Marchantia_polymorpha	33.8	9e-39
TRINITY_DN13492_c0_g4	XP_015966796.1	purple acid phosphatase 17-like [Arachis duranensis]	Arachis_duranensis	34.4	1.1e-14
TRINITY_DN13492_c0_g5	XP_023889137.1	purine nucleoside phosphorylase-like [Quercus suber]	Quercus_suber	44.8	2.1e-60
TRINITY_DN13494_c0_g1	XP_023902825.1	actin-related protein 2-like [Quercus suber]	Quercus_suber	41.9	6.1e-92
TRINITY_DN13495_c0_g1	XP_024048203.1	potassium channel KAT3 isoform X2 [Citrus clementina]	Citrus_clementina	25.3	1e-28
TRINITY_DN13499_c0_g1	RAL48039.1	hypothetical protein DM860_017816 [Cuscuta australis]	Cuscuta_australis	70.2	2.3e-12
TRINITY_DN13499_c0_g3	XP_022871897.1	uncharacterized protein LOC111390994 [Olea europaea var. sylvestris]	Olea_europaea	75.4	1.3e-15
TRINITY_DN13502_c0_g1	XP_009351070.1	PREDICTED: obg-like ATPase 1 [Pyrus x bretschneideri]	Pyrus_x_bretschneideri	71.6	6.3e-87
TRINITY_DN13508_c0_g2	XP_023899246.1	UDP-N-acetylglucosamine pyrophosphorylase-like [Quercus suber]	Quercus_suber	47.6	7.4e-74
TRINITY_DN13510_c0_g2	XP_003062617.1	predicted protein [Micromonas pusilla CCMP1545]	Micromonas_pusilla	29.3	3e-14
TRINITY_DN13512_c1_g1	PWA62371.1	splicing factor, CC1-like protein [Artemisia annua]	Artemisia_annua	39.2	6.2e-13
TRINITY_DN13512_c1_g3	XP_027106835.1	SURP and G-patch domain-containing protein 1-like protein isoform X2 [Coffea arabica]	Coffea_arabica	49.4	2.1e-11
TRINITY_DN13518_c0_g1	GAX78660.1	hypothetical protein CEUSTIGMA_g6098.t1 [Chlamydomonas eustigma]	Chlamydomonas_eustigma	45.6	6.6e-58
TRINITY_DN1351_c0_g1	PSC72325.1	elongation factor 3 [Micractinium conductrix]	Micractinium_conductrix	92.6	3.6e-28
TRINITY_DN13521_c0_g1	VDD09857.1	unnamed protein product [Brassica oleracea]	Brassica_oleracea	38.1	2.1e-18
TRINITY_DN13523_c0_g1	XP_020161106.1	putative serpin-Z8 [Aegilops tauschii subsp. tauschii]	Aegilops_tauschii	37	1.3e-12
TRINITY_DN13523_c0_g2	EYU25376.1	hypothetical protein MIMGU_mgv1a017911mg, partial [Erythranthe guttata]	Erythranthe_guttata	31.6	4.3e-08
TRINITY_DN13526_c0_g1	XP_010922379.1	PREDICTED: probable ADP-ribosylation factor GTPase-activating protein AGD6 [Elaeis guineensis]	Elaeis_guineensis	44.8	2.6e-24
TRINITY_DN13528_c0_g1	XP_012847497.1	PREDICTED: probable E3 ubiquitin-protein ligase HERC4 isoform X3 [Erythranthe guttata]	Erythranthe_guttata	29.2	5.2e-40
TRINITY_DN13529_c0_g3	PHT27344.1	hypothetical protein CQW23_33044 [Capsicum baccatum]	Capsicum_baccatum	58.2	2.4e-08
TRINITY_DN13540_c2_g6	XP_001692312.1	R-SNARE protein, VAMP72-family [Chlamydomonas reinhardtii]	Chlamydomonas_reinhardtii	45.6	1.6e-08
TRINITY_DN13540_c3_g1	CBI32283.3	unnamed protein product, partial [Vitis vinifera]	Vitis_vinifera	27.8	2e-88
TRINITY_DN13544_c0_g1	XP_015934592.1	F-box protein 7 [Arachis duranensis]	Arachis_duranensis	37.4	1.5e-18
TRINITY_DN13549_c1_g1	XP_005846718.1	hypothetical protein CHLNCDRAFT_135134 [Chlorella variabilis]	Chlorella_variabilis	34.1	3.4e-18
TRINITY_DN13550_c1_g5	XP_009137450.1	PREDICTED: NADPH--cytochrome P450 reductase 1 isoform X1 [Brassica rapa]	Brassica_rapa	45.8	1.1e-109
TRINITY_DN13555_c0_g5	EOA17244.1	hypothetical protein CARUB_v10005517mg [Capsella rubella]	Capsella_rubella	33.5	3.4e-27
TRINITY_DN13557_c0_g1	XP_004134793.1	PREDICTED: fumarylacetoacetase [Cucumis sativus]	Cucumis_sativus	54.7	3.6e-139
TRINITY_DN13559_c0_g1	GBF92303.1	hypothetical protein Rsub_05505 [Raphidocelis subcapitata]	Raphidocelis_subcapitata	40.3	2.7e-16
TRINITY_DN13561_c1_g2	XP_021302102.1	polyamine oxidase-like [Sorghum bicolor]	Sorghum_bicolor	35.1	8e-69
TRINITY_DN13561_c1_g6	GAQ81739.1	hypothetical protein KFL_000890280 [Klebsormidium nitens]	Klebsormidium_nitens	39.1	6.8e-21
TRINITY_DN13561_c1_g7	XP_005648016.1	molybdopterin binding oxidoreductase, partial [Coccomyxa subellipsoidea C-169]	Coccomyxa_subellipsoidea	52	6.9e-144
TRINITY_DN13561_c2_g1	AIU48281.1	minichromosome maintenance 5 protein, partial [Illicium henryi]	Illicium_henryi	51.4	1.2e-190
TRINITY_DN13565_c2_g3	XP_005643283.1	methionine adenosyltransferase regulatory beta subunit-related [Coccomyxa subellipsoidea C-169]	Coccomyxa_subellipsoidea	28.5	1.4e-18
TRINITY_DN13567_c3_g2	XP_023875171.1	dipeptidase sirJ-like [Quercus suber]	Quercus_suber	39.4	4.1e-62
TRINITY_DN13569_c0_g1	XP_002954155.1	hypothetical protein VOLCADRAFT_106247 [Volvox carteri f. nagariensis]	Volvox_carteri	45.4	1.7e-36
TRINITY_DN13571_c1_g1	BAK07442.1	predicted protein [Hordeum vulgare subsp. vulgare]	Hordeum_vulgare	42.9	6.7e-169
TRINITY_DN13572_c0_g1	PWA34570.1	aldolase superfamily protein [Artemisia annua]	Artemisia_annua	69.2	1.9e-110
TRINITY_DN13578_c0_g1	RRT55822.1	hypothetical protein B296_00025975 [Ensete ventricosum]	Ensete_ventricosum	36.5	8.4e-18
TRINITY_DN13578_c0_g3	XP_004983569.1	mitochondrial carnitine/acylcarnitine carrier-like protein [Setaria italica]	Setaria_italica	37.3	2.2e-39
TRINITY_DN13585_c1_g2	XP_024373728.1	spliceosome-associated protein 130 A-like [Physcomitrella patens]	Physcomitrella_patens	57.1	0
TRINITY_DN13586_c0_g1	GAX86243.1	hypothetical protein CEUSTIGMA_g13656.t1 [Chlamydomonas eustigma]	Chlamydomonas_eustigma	40.5	2e-22
TRINITY_DN13588_c0_g1	XP_020221677.1	sterol 3-beta-glucosyltransferase UGT80B1 isoform X1 [Cajanus cajan]	Cajanus_cajan	32.2	3.2e-49
TRINITY_DN13590_c1_g1	XP_008790208.1	histone-lysine N-methyltransferase SUVR5 isoform X2 [Phoenix dactylifera]	Phoenix_dactylifera	38.4	6.8e-42
TRINITY_DN13591_c0_g1	RYR76549.1	hypothetical protein Ahy_A01g001130 isoform A [Arachis hypogaea]	Arachis_hypogaea	87.4	3.8e-37
TRINITY_DN13592_c0_g1	PRW45104.1	inactive purple acid phosphatase 2 [Chlorella sorokiniana]	Chlorella_sorokiniana	45.1	1.1e-26
TRINITY_DN13592_c0_g2	KXZ45466.1	hypothetical protein GPECTOR_54g207 [Gonium pectorale]	Gonium_pectorale	55.4	6.7e-77
TRINITY_DN13592_c0_g4	RAL48401.1	hypothetical protein DM860_005825 [Cuscuta australis]	Cuscuta_australis	35	7.8e-55
TRINITY_DN13593_c0_g1	GAQ87315.1	F-box and WD-40 domain protein 7 [Klebsormidium nitens]	Klebsormidium_nitens	35.2	1.9e-45
TRINITY_DN13594_c0_g2	OAE21596.1	hypothetical protein AXG93_939s1020 [Marchantia polymorpha subsp. ruderalis]	Marchantia_polymorpha	63.8	5.1e-128
TRINITY_DN13595_c0_g1	ABR16485.1	unknown [Picea sitchensis]	Picea_sitchensis	60.1	2.4e-77
TRINITY_DN13595_c0_g2	XP_021984045.1	aldehyde dehydrogenase family 2 member B4, mitochondrial-like [Helianthus annuus]	Helianthus_annuus	59.3	3.5e-83
TRINITY_DN13597_c5_g1	XP_005645719.1	GTP-binding protein YPTC1 [Coccomyxa subellipsoidea C-169]	Coccomyxa_subellipsoidea	50.9	5e-25
TRINITY_DN13597_c5_g3	GAQ81550.1	hypothetical protein KFL_000830320 [Klebsormidium nitens]	Klebsormidium_nitens	31.5	2.6e-07
TRINITY_DN13597_c6_g1	GAQ91562.1	putative DNA polymerase X family [Klebsormidium nitens]	Klebsormidium_nitens	40.6	6.1e-67
TRINITY_DN13603_c0_g1	ACN41173.1	unknown [Picea sitchensis]	Picea_sitchensis	35.7	8.8e-26
TRINITY_DN13607_c0_g1	GAQ83716.1	NADPH oxidase [Klebsormidium nitens]	Klebsormidium_nitens	41.7	3e-103
TRINITY_DN13609_c2_g1	XP_023926279.1	inositol phosphorylceramide synthase catalytic subunit aur1-like [Quercus suber]	Quercus_suber	32.2	2.5e-17
TRINITY_DN13611_c0_g1	XP_008796507.2	ADP-ribosylation factor 1-like [Phoenix dactylifera]	Phoenix_dactylifera	60.2	1.7e-52
TRINITY_DN13614_c0_g1	XP_009603071.1	PREDICTED: zinc finger MYM-type protein 1-like [Nicotiana tomentosiformis]	Nicotiana_tomentosiformis	47.7	1.3e-09
TRINITY_DN13616_c0_g1	XP_013906134.1	putative chaperone protein HSP31 [Monoraphidium neglectum]	Monoraphidium_neglectum	39.7	5.3e-37
TRINITY_DN13618_c0_g10	GAQ78566.1	putative protease [Klebsormidium nitens]	Klebsormidium_nitens	51.7	2.8e-34
TRINITY_DN13618_c0_g12	ADE77522.1	unknown [Picea sitchensis]	Picea_sitchensis	44	2.3e-06
TRINITY_DN13618_c0_g4	GAQ78566.1	putative protease [Klebsormidium nitens]	Klebsormidium_nitens	40.8	5.9e-82
TRINITY_DN13618_c0_g8	GAQ78566.1	putative protease [Klebsormidium nitens]	Klebsormidium_nitens	58.8	9.2e-12
TRINITY_DN13620_c0_g3	KMS64936.1	hypothetical protein BVRB_041110, partial [Beta vulgaris subsp. vulgaris]	Beta_vulgaris	67.3	1e-10
TRINITY_DN13624_c1_g1	KMS65245.1	hypothetical protein BVRB_037930, partial [Beta vulgaris subsp. vulgaris]	Beta_vulgaris	55.9	7.3e-09
TRINITY_DN13624_c1_g3	KMS65245.1	hypothetical protein BVRB_037930, partial [Beta vulgaris subsp. vulgaris]	Beta_vulgaris	85.1	2.1e-24
TRINITY_DN13625_c1_g8	GAQ85615.1	phytanoyl-CoA hydroxylase [Klebsormidium nitens]	Klebsormidium_nitens	53	1.3e-49
TRINITY_DN13625_c1_g9	GAQ85615.1	phytanoyl-CoA hydroxylase [Klebsormidium nitens]	Klebsormidium_nitens	51.9	7.8e-23
TRINITY_DN13627_c0_g3	PRW61301.1	deleted in malignant brain tumors 1 -like [Chlorella sorokiniana]	Chlorella_sorokiniana	29.2	3.1e-36
TRINITY_DN13631_c0_g1	XP_001696573.1	small rab-related GTPase [Chlamydomonas reinhardtii]	Chlamydomonas_reinhardtii	49.2	3.4e-55
TRINITY_DN13631_c1_g1	GAX81465.1	hypothetical protein CEUSTIGMA_g8894.t1 [Chlamydomonas eustigma]	Chlamydomonas_eustigma	45.4	2.5e-64
TRINITY_DN13631_c1_g2	KXZ43313.1	hypothetical protein GPECTOR_94g635 [Gonium pectorale]	Gonium_pectorale	54.6	9.7e-50
TRINITY_DN13633_c1_g3	RID67684.1	hypothetical protein BRARA_D02756 [Brassica rapa]	Brassica_rapa	43	4.1e-11
TRINITY_DN13637_c0_g2	XP_007162408.1	hypothetical protein PHAVU_001G149600g [Phaseolus vulgaris]	Phaseolus_vulgaris	36.5	1.5e-25
TRINITY_DN13641_c0_g2	XP_008223291.1	PREDICTED: importin subunit alpha-2 [Prunus mume]	Prunus_mume	46.9	2.3e-66
TRINITY_DN13643_c1_g1	EFJ29630.1	flagellar associated protein 59, partial [Selaginella moellendorffii]	Selaginella_moellendorffii	28	4.2e-23
TRINITY_DN13643_c3_g2	XP_012476995.1	PREDICTED: SCY1-like protein 2 isoform X1 [Gossypium raimondii]	Gossypium_raimondii	30.6	1.7e-67
TRINITY_DN13643_c3_g3	GAQ88048.1	hypothetical protein KFL_003960090 [Klebsormidium nitens]	Klebsormidium_nitens	47.1	4.1e-156
TRINITY_DN13643_c3_g4	BAK07291.1	predicted protein [Hordeum vulgare subsp. vulgare]	Hordeum_vulgare	30.8	7.4e-15
TRINITY_DN13644_c0_g13	XP_026657933.1	ubiquitin-conjugating enzyme E2-23 kDa-like isoform X2 [Phoenix dactylifera]	Phoenix_dactylifera	60	1.6e-53
TRINITY_DN13644_c0_g2	BAT17865.1	Os12g0588900, partial [Oryza sativa Japonica Group]	Oryza_sativa	27.2	3.2e-12
TRINITY_DN13650_c0_g1	GAQ85712.1	hypothetical protein KFL_002500100 [Klebsormidium nitens]	Klebsormidium_nitens	39.7	5.9e-39
TRINITY_DN13651_c1_g2	PNX93486.1	retrotransposon-related protein, partial [Trifolium pratense]	Trifolium_pratense	33.7	1.7e-10
TRINITY_DN13654_c0_g3	XP_001695011.1	dual-specificity tyrosine regulated protein kinase 1, partial [Chlamydomonas reinhardtii]	Chlamydomonas_reinhardtii	44.6	4.8e-80
TRINITY_DN13659_c0_g1	XP_023743789.1	uncharacterized protein LOC111891956, partial [Lactuca sativa]	Lactuca_sativa	43.8	1.5e-13
TRINITY_DN13659_c2_g4	XP_025983757.1	uncharacterized protein LOC113001179 [Glycine max]	Glycine_max	44.9	4.2e-10
TRINITY_DN13660_c0_g1	XP_015637762.1	thiamine pyrophosphokinase 3 [Oryza sativa Japonica Group]	Oryza_sativa	37.9	2.8e-30
TRINITY_DN13662_c3_g1	GAQ80547.1	hypothetical protein KFL_000560360 [Klebsormidium nitens]	Klebsormidium_nitens	27.6	1.7e-19
TRINITY_DN13662_c4_g1	XP_023912882.1	ATP synthase subunit alpha, mitochondrial [Quercus suber]	Quercus_suber	69.2	2.8e-213
TRINITY_DN13666_c2_g2	KXZ56850.1	hypothetical protein GPECTOR_1g767 [Gonium pectorale]	Gonium_pectorale	33	3.1e-21
TRINITY_DN13666_c2_g4	GBG87839.1	hypothetical protein CBR_g45995 [Chara braunii]	Chara_braunii	54.2	8.3e-73
TRINITY_DN13667_c0_g2	XP_002970192.1	AP-5 complex subunit mu [Selaginella moellendorffii]	Selaginella_moellendorffii	29.3	6.3e-30
TRINITY_DN13670_c0_g1	EPS74531.1	hypothetical protein M569_00248, partial [Genlisea aurea]	Genlisea_aurea	59.4	2.3e-09
TRINITY_DN13671_c2_g1	GBG71418.1	hypothetical protein CBR_g8838 [Chara braunii]	Chara_braunii	45.3	3.8e-39
TRINITY_DN13671_c2_g5	XP_004497735.1	ATP-dependent zinc metalloprotease FTSH 4, mitochondrial-like [Cicer arietinum]	Cicer_arietinum	47.4	7e-151
TRINITY_DN13671_c2_g8	GBG91118.1	hypothetical protein CBR_g51921 [Chara braunii]	Chara_braunii	60.2	1.3e-24
TRINITY_DN13675_c1_g1	KMS94345.1	hypothetical protein BVRB_022340 [Beta vulgaris subsp. vulgaris]	Beta_vulgaris	83.1	1.8e-20
TRINITY_DN13675_c1_g3	KMS64611.1	hypothetical protein BVRB_018510, partial [Beta vulgaris subsp. vulgaris]	Beta_vulgaris	89.2	5.9e-08
TRINITY_DN13677_c0_g1	VDD33771.1	unnamed protein product [Brassica oleracea]	Brassica_oleracea	35.3	3.4e-27
TRINITY_DN13679_c0_g2	KEH43917.1	zinc finger protein [Medicago truncatula]	Medicago_truncatula	31.8	2.4e-16
TRINITY_DN13682_c0_g1	PTQ46304.1	hypothetical protein MARPO_0011s0008 [Marchantia polymorpha]	Marchantia_polymorpha	32.3	2.6e-41
TRINITY_DN13686_c0_g2	AEG74528.1	kinesin-2 motor subunit FLA8 [Dunaliella salina]	Dunaliella_salina	65.6	1.1e-90
TRINITY_DN13686_c0_g4	XP_005650986.1	Fibrillarin [Coccomyxa subellipsoidea C-169]	Coccomyxa_subellipsoidea	79.1	1e-67
TRINITY_DN13686_c0_g6	XP_024379313.1	mediator of RNA polymerase II transcription subunit 36a [Physcomitrella patens]	Physcomitrella_patens	75.8	7.1e-34
TRINITY_DN13687_c0_g1	GAQ93398.1	Phage_integrase [Klebsormidium nitens]	Klebsormidium_nitens	35.4	4.9e-49
TRINITY_DN13689_c0_g1	XP_023907877.1	ras-like protein [Quercus suber]	Quercus_suber	41.7	3.7e-36
TRINITY_DN13692_c0_g3	PNW87109.1	hypothetical protein CHLRE_02g109400v5 [Chlamydomonas reinhardtii]	Chlamydomonas_reinhardtii	31.5	3.5e-45
TRINITY_DN13692_c1_g3	AKR76260.1	beta-1 tubulin [Dendrobium catenatum]	Dendrobium_catenatum	95.6	5.7e-237
TRINITY_DN13692_c1_g4	XP_024364581.1	ribosomal RNA small subunit methyltransferase nep-1-like [Physcomitrella patens]	Physcomitrella_patens	53.9	3.2e-62
TRINITY_DN13694_c2_g2	XP_006645519.1	PREDICTED: probable glucuronosyltransferase Os01g0157700 [Oryza brachyantha]	Oryza_brachyantha	28.7	1.8e-06
TRINITY_DN13694_c3_g1	XP_007509872.1	predicted protein [Bathycoccus prasinos]	Bathycoccus_prasinos	47.6	5.6e-25
TRINITY_DN13695_c3_g3	EFJ31263.1	hypothetical protein SELMODRAFT_88360 [Selaginella moellendorffii]	Selaginella_moellendorffii	50	1.1e-66
TRINITY_DN13695_c3_g4	PRW61266.1	DNAJ heat shock N-terminal domain-containing [Chlorella sorokiniana]	Chlorella_sorokiniana	32.9	4.2e-54
TRINITY_DN13695_c3_g6	XP_023889251.1	uncharacterized protein LOC112001311 [Quercus suber]	Quercus_suber	40.9	5.8e-17
TRINITY_DN13695_c3_g8	EFJ31263.1	hypothetical protein SELMODRAFT_88360 [Selaginella moellendorffii]	Selaginella_moellendorffii	39.9	2.7e-22
TRINITY_DN13697_c3_g9	XP_006660026.1	PREDICTED: synaptotagmin-5-like [Oryza brachyantha]	Oryza_brachyantha	24.5	8.1e-07
TRINITY_DN13700_c0_g2	EFJ17269.1	hypothetical protein SELMODRAFT_115022, partial [Selaginella moellendorffii]	Selaginella_moellendorffii	35.4	5.4e-53
TRINITY_DN13701_c3_g5	PON44635.1	DNA replication licensing factor Mcm [Parasponia andersonii]	Parasponia_andersonii	41.1	4.1e-75
TRINITY_DN13702_c0_g1	XP_024532429.1	beta-galactosidase 8 [Selaginella moellendorffii]	Selaginella_moellendorffii	43.1	4.3e-135
TRINITY_DN13703_c0_g1	BAJ85104.1	predicted protein [Hordeum vulgare subsp. vulgare]	Hordeum_vulgare	79.2	9.3e-157
TRINITY_DN13709_c3_g4	GAQ81910.1	hypothetical protein KFL_000940200 [Klebsormidium nitens]	Klebsormidium_nitens	29.3	1.2e-14
TRINITY_DN13709_c3_g7	XP_006287457.1	uncharacterized protein LOC17883610 isoform X2 [Capsella rubella]	Capsella_rubella	27.6	6.9e-10
TRINITY_DN13710_c4_g3	XP_001417778.1	predicted protein [Ostreococcus lucimarinus CCE9901]	Ostreococcus_sp._'lucimarinus'	69.9	8.3e-123
TRINITY_DN13710_c4_g4	XP_024530250.1	WD repeat-containing protein 35-like [Selaginella moellendorffii]	Selaginella_moellendorffii	26.1	5e-30
TRINITY_DN13711_c1_g1	PWA78174.1	zinc finger MYM-type protein 1 [Artemisia annua]	Artemisia_annua	34.5	1.2e-08
TRINITY_DN13713_c2_g2	XP_024518066.1	E3 ubiquitin-protein ligase makorin [Selaginella moellendorffii]	Selaginella_moellendorffii	42.5	1.5e-52
TRINITY_DN13716_c2_g1	XP_016166887.1	plant UBX domain-containing protein 4 isoform X1 [Arachis ipaensis]	Arachis_ipaensis	40	9.8e-15
TRINITY_DN13722_c0_g10	XP_004300905.1	PREDICTED: uncharacterized protein LOC101296672 [Fragaria vesca subsp. vesca]	Fragaria_vesca	34.2	3.9e-29
TRINITY_DN13722_c0_g8	GBG81605.1	hypothetical protein CBR_g32597 [Chara braunii]	Chara_braunii	66.7	1.7e-09
TRINITY_DN13723_c0_g3	PON42477.1	Glycine cleavage system H-protein, subgroup [Parasponia andersonii]	Parasponia_andersonii	52.5	4.5e-33
TRINITY_DN13728_c0_g4	XP_005846520.1	hypothetical protein CHLNCDRAFT_135778 [Chlorella variabilis]	Chlorella_variabilis	37.7	6.5e-07
TRINITY_DN13731_c2_g1	XP_010272398.1	PREDICTED: mitotic checkpoint serine/threonine-protein kinase BUB1 [Nelumbo nucifera]	Nelumbo_nucifera	34.5	3.6e-40
TRINITY_DN13731_c3_g1	XP_024367589.1	ras-related protein RABC1-like [Physcomitrella patens]	Physcomitrella_patens	63.9	2e-44
TRINITY_DN13741_c0_g1	RWR77919.1	pathogenesis-related protein PRB1-3-like protein [Cinnamomum micranthum f. kanehirae]	Cinnamomum_micranthum	39.9	1e-27
TRINITY_DN13743_c0_g1	XP_024368230.1	protein XAP5 CIRCADIAN TIMEKEEPER-like [Physcomitrella patens]	Physcomitrella_patens	48.4	5.8e-67
TRINITY_DN13746_c3_g2	XP_023910480.1	GTP-binding protein ypt2-like [Quercus suber]	Quercus_suber	56	9.7e-53
TRINITY_DN13748_c0_g1	XP_024030375.1	serine/threonine-protein kinase CTR1 isoform X1 [Morus notabilis]	Morus_notabilis	41.9	8.2e-06
TRINITY_DN13748_c0_g3	XP_024977101.1	2-oxoisovalerate dehydrogenase subunit alpha 1, mitochondrial-like [Cynara cardunculus var. scolymus]	Cynara_cardunculus	48.8	3.7e-104
TRINITY_DN13750_c1_g1	XP_024385355.1	diacylglycerol O-acyltransferase 1-2-like [Physcomitrella patens]	Physcomitrella_patens	28.5	1.8e-17
TRINITY_DN13750_c1_g4	EFJ13286.1	hypothetical protein SELMODRAFT_181873 [Selaginella moellendorffii]	Selaginella_moellendorffii	21.3	2.4e-25
TRINITY_DN13759_c0_g1	GAQ77712.1	hypothetical protein KFL_000020730 [Klebsormidium nitens]	Klebsormidium_nitens	31.7	1.8e-37
TRINITY_DN13760_c0_g3	KMS64611.1	hypothetical protein BVRB_018510, partial [Beta vulgaris subsp. vulgaris]	Beta_vulgaris	69.2	5.6e-09
TRINITY_DN13760_c0_g5	KMS64611.1	hypothetical protein BVRB_018510, partial [Beta vulgaris subsp. vulgaris]	Beta_vulgaris	86.5	8.6e-08
TRINITY_DN13760_c0_g6	EPS74505.1	hypothetical protein M569_00222, partial [Genlisea aurea]	Genlisea_aurea	75.4	4.5e-41
TRINITY_DN13761_c0_g2	PTQ41970.1	hypothetical protein MARPO_0032s0134 [Marchantia polymorpha]	Marchantia_polymorpha	27.4	1.7e-16
TRINITY_DN13762_c0_g2	GAQ77870.1	U6 snRNA-associated Sm-like protein LSm1 [Klebsormidium nitens]	Klebsormidium_nitens	53.3	1.7e-22
TRINITY_DN13764_c0_g2	KDO54037.1	hypothetical protein CISIN_1g039210mg, partial [Citrus sinensis]	Citrus_sinensis	40.9	6.8e-22
TRINITY_DN13767_c1_g2	OMP13571.1	hypothetical protein COLO4_01399 [Corchorus olitorius]	Corchorus_olitorius	55.7	9.4e-09
TRINITY_DN13767_c1_g3	OMP13571.1	hypothetical protein COLO4_01399 [Corchorus olitorius]	Corchorus_olitorius	65.3	2e-77
TRINITY_DN13768_c2_g10	XP_002962577.1	TATA-binding protein 2 [Selaginella moellendorffii]	Selaginella_moellendorffii	81.5	2.6e-77
TRINITY_DN13771_c0_g2	XP_020186159.1	uncharacterized protein LOC109771878 [Aegilops tauschii subsp. tauschii]	Aegilops_tauschii	48.4	3.7e-12
TRINITY_DN13773_c1_g4	GBG66264.1	hypothetical protein CBR_g57862 [Chara braunii]	Chara_braunii	36.8	1.3e-22
TRINITY_DN13776_c4_g2	KZV15445.1	programmed cell death 8 (apoptosis-inducing factor) [Dorcoceras hygrometricum]	Dorcoceras_hygrometricum	38.1	2.2e-54
TRINITY_DN13780_c0_g1	BAK01936.1	predicted protein [Hordeum vulgare subsp. vulgare]	Hordeum_vulgare	38.3	6.2e-42
TRINITY_DN13784_c0_g1	GAX78526.1	hypothetical protein CEUSTIGMA_g5966.t1 [Chlamydomonas eustigma]	Chlamydomonas_eustigma	50.6	1.2e-41
TRINITY_DN13785_c0_g1	XP_004496652.1	cysteine and histidine-rich domain-containing protein RAR1 [Cicer arietinum]	Cicer_arietinum	32.9	3.4e-29
TRINITY_DN13787_c0_g1	XP_015941956.1	glutamine--tRNA ligase isoform X1 [Arachis duranensis]	Arachis_duranensis	46.4	8.9e-183
TRINITY_DN13788_c0_g3	XP_014499911.1	calcineurin subunit B [Vigna radiata var. radiata]	Vigna_radiata	33	9.1e-23
TRINITY_DN13789_c0_g1	XP_024533139.1	TBC1 domain family member 15 isoform X2 [Selaginella moellendorffii]	Selaginella_moellendorffii	31.6	4.2e-06
TRINITY_DN13789_c0_g2	PNY16297.1	poly(U)-specific endoribonuclease-B-like protein [Trifolium pratense]	Trifolium_pratense	50.2	7.4e-67
TRINITY_DN13792_c0_g1	Q9XFY6.1	RecName: Full=Degreening-related gene dee76 protein	Auxenochlorella_protothecoides	54	6.7e-78
TRINITY_DN13794_c1_g1	XP_026436168.1	histone deacetylase 6-like [Papaver somniferum]	Papaver_somniferum	34.8	7.1e-09
TRINITY_DN13795_c0_g1	PIN19733.1	Fatty acid desaturase [Handroanthus impetiginosus]	Handroanthus_impetiginosus	48.9	4.6e-88
TRINITY_DN13795_c0_g2	PTQ33426.1	hypothetical protein MARPO_0089s0053 [Marchantia polymorpha]	Marchantia_polymorpha	52.8	1e-30
TRINITY_DN13798_c2_g2	XP_023917490.1	tRNA-dihydrouridine(20a/20b) synthase [NAD(P)+]-like [Quercus suber]	Quercus_suber	30.9	6e-38
TRINITY_DN13800_c0_g1	XP_023897711.1	non-specific lipid-transfer protein-like [Quercus suber]	Quercus_suber	60.8	4.5e-66
TRINITY_DN13800_c0_g11	GAQ87866.1	sphingomyelin phosphodiesterase [Klebsormidium nitens]	Klebsormidium_nitens	31.4	3.9e-50
TRINITY_DN13800_c0_g3	XP_006663930.2	PREDICTED: DNA polymerase alpha subunit B [Oryza brachyantha]	Oryza_brachyantha	29.6	6.1e-65
TRINITY_DN13800_c0_g4	XP_027069835.1	ras-related protein RABE1a-like [Coffea arabica]	Coffea_arabica	34	7.7e-30
TRINITY_DN13800_c0_g6	XP_004289967.1	PREDICTED: 60S ribosomal protein L14-2 [Fragaria vesca subsp. vesca]	Fragaria_vesca	51.9	1.6e-28
TRINITY_DN13800_c0_g8	XP_003055335.1	predicted protein [Micromonas pusilla CCMP1545]	Micromonas_pusilla	36.6	9.8e-37
TRINITY_DN13802_c2_g4	XP_020593204.1	activating signal cointegrator 1 complex subunit 2 [Phalaenopsis equestris]	Phalaenopsis_equestris	24.7	2e-26
TRINITY_DN13802_c2_g7	XP_015874825.1	uncharacterized protein LOC107411701 [Ziziphus jujuba]	Ziziphus_jujuba	31.9	1e-46
TRINITY_DN13805_c0_g1	OVA13446.1	Fanconi anemia group I protein [Macleaya cordata]	Macleaya_cordata	58	2e-11
TRINITY_DN13808_c3_g2	XP_023901716.1	ATP-dependent RNA helicase DBP5-like [Quercus suber]	Quercus_suber	46.7	2.5e-96
TRINITY_DN13811_c0_g1	PHT52732.1	Brefeldin A-inhibited guanine nucleotide-exchange protein 5 [Capsicum baccatum]	Capsicum_baccatum	41	5.4e-10
TRINITY_DN13811_c0_g6	PKA54555.1	hypothetical protein AXF42_Ash000390 [Apostasia shenzhenica]	Apostasia_shenzhenica	54.7	2.5e-07
TRINITY_DN13813_c0_g1	KMS91954.1	hypothetical protein BVRB_033440, partial [Beta vulgaris subsp. vulgaris]	Beta_vulgaris	69.6	1.8e-19
TRINITY_DN13814_c1_g3	XP_012841364.1	PREDICTED: thyroid adenoma-associated protein homolog [Erythranthe guttata]	Erythranthe_guttata	23.4	2.7e-34
TRINITY_DN13818_c0_g1	PIN01833.1	hypothetical protein CDL12_25656 [Handroanthus impetiginosus]	Handroanthus_impetiginosus	42.3	2.9e-27
TRINITY_DN13819_c5_g2	KXZ54406.1	hypothetical protein GPECTOR_5g61 [Gonium pectorale]	Gonium_pectorale	64.1	1.1e-68
TRINITY_DN13819_c5_g3	GAQ83437.1	hypothetical protein KFL_001480060 [Klebsormidium nitens]	Klebsormidium_nitens	53.3	3.9e-06
TRINITY_DN13822_c0_g1	PRW05816.1	Tyrosine- kinase isoform SRK1 [Chlorella sorokiniana]	Chlorella_sorokiniana	37.4	3.4e-24
TRINITY_DN13828_c1_g1	XP_020102289.1	chromatin remodeling protein EBS-like [Ananas comosus]	Ananas_comosus	37.2	9.9e-10
TRINITY_DN13828_c1_g3	XP_023902956.1	ATP-binding cassette sub-family D member 1-like [Quercus suber]	Quercus_suber	40.8	1.8e-137
TRINITY_DN13830_c0_g3	YP_009463605.1	4-dihydroxy-2-butanone 4-phosphate synthase (chloroplast) [Haematococcus lacustris]	Haematococcus_lacustris	60.9	2.2e-11
TRINITY_DN13830_c0_g4	PPR92190.1	hypothetical protein GOBAR_AA28481 [Gossypium barbadense]	Gossypium_barbadense	48.8	3.6e-09
TRINITY_DN13830_c0_g7	PPD74579.1	hypothetical protein GOBAR_DD28494 [Gossypium barbadense]	Gossypium_barbadense	43.7	1.5e-10
TRINITY_DN13832_c0_g1	GAQ85233.1	hypothetical protein KFL_002250130 [Klebsormidium nitens]	Klebsormidium_nitens	37.1	1.5e-16
TRINITY_DN13832_c0_g2	GAQ85233.1	hypothetical protein KFL_002250130 [Klebsormidium nitens]	Klebsormidium_nitens	35.1	4.1e-48
TRINITY_DN13833_c1_g1	XP_023902886.1	nuclear distribution protein PAC1-like [Quercus suber]	Quercus_suber	45.3	1.1e-28
TRINITY_DN13834_c4_g4	KDD71303.1	hypothetical protein H632_c5344p0, partial [Helicosporidium sp. ATCC 50920]	Helicosporidium_sp._ATCC_50920	50	4.9e-15
TRINITY_DN13835_c2_g1	OMO98120.1	LUC7-related protein [Corchorus olitorius]	Corchorus_olitorius	41.2	3e-13
TRINITY_DN13836_c2_g2	VDD24561.1	unnamed protein product [Brassica oleracea]	Brassica_oleracea	33.6	6.8e-06
TRINITY_DN13836_c2_g5	GBG78133.1	hypothetical protein CBR_g26169 [Chara braunii]	Chara_braunii	47	1.3e-12
TRINITY_DN13836_c3_g1	XP_017606862.1	PREDICTED: TBC1 domain family member 17-like isoform X1 [Gossypium arboreum]	Gossypium_arboreum	25	4.2e-14
TRINITY_DN13839_c2_g2	XP_009351301.1	PREDICTED: major facilitator superfamily domain-containing protein 1-like, partial [Pyrus x bretschneideri]	Pyrus_x_bretschneideri	52.2	1.5e-27
TRINITY_DN13841_c0_g1	XP_011400411.1	Extracellular serine proteinase [Auxenochlorella protothecoides]	Auxenochlorella_protothecoides	41.3	6.7e-08
TRINITY_DN13843_c1_g12	XP_024367053.1	chaperone protein dnaJ 13-like [Physcomitrella patens]	Physcomitrella_patens	27.8	6.2e-42
TRINITY_DN13843_c1_g3	XP_023890476.1	glutamine--fructose-6-phosphate aminotransferase [isomerizing]-like [Quercus suber]	Quercus_suber	52	1.3e-197
TRINITY_DN13845_c0_g4	PPD77549.1	hypothetical protein GOBAR_DD25523 [Gossypium barbadense]	Gossypium_barbadense	38.7	4.7e-06
TRINITY_DN13846_c4_g2	XP_010922269.2	PREDICTED: WD repeat-containing protein 43 [Elaeis guineensis]	Elaeis_guineensis	28	1e-22
TRINITY_DN13846_c4_g3	OMP00149.1	hypothetical protein COLO4_12890 [Corchorus olitorius]	Corchorus_olitorius	30	3.7e-10
TRINITY_DN13847_c0_g3	XP_017257357.1	PREDICTED: glycerol-3-phosphate dehydrogenase [NAD(+)] [Daucus carota subsp. sativus]	Daucus_carota	43	2.3e-83
TRINITY_DN13848_c1_g4	XP_002946910.1	hypothetical protein VOLCADRAFT_103155 [Volvox carteri f. nagariensis]	Volvox_carteri	29.4	5.3e-09
TRINITY_DN13848_c1_g5	RMZ56603.1	hypothetical protein APUTEX25_004767, partial [Auxenochlorella protothecoides]	Auxenochlorella_protothecoides	37.7	1.8e-42
TRINITY_DN13848_c1_g8	XP_008798443.1	glutamate synthase 1 [NADH], chloroplastic [Phoenix dactylifera]	Phoenix_dactylifera	22.1	2e-15
TRINITY_DN13852_c1_g2	XP_003079102.2	FAD-dependent pyridine nucleotide-disulphide oxidoreductase [Ostreococcus tauri]	Ostreococcus_tauri	34.2	2.5e-78
TRINITY_DN13854_c2_g3	XP_002947825.1	hypothetical protein VOLCADRAFT_79838 [Volvox carteri f. nagariensis]	Volvox_carteri	68.9	3.8e-21
TRINITY_DN13856_c5_g1	XP_006665103.1	PREDICTED: histone H2B [Oryza brachyantha]	Oryza_brachyantha	89.8	1.5e-15
TRINITY_DN13856_c5_g3	XP_006665103.1	PREDICTED: histone H2B [Oryza brachyantha]	Oryza_brachyantha	89.8	4.4e-15
TRINITY_DN13857_c0_g1	XP_009363225.1	PREDICTED: probable calcium-binding protein CML49 isoform X1 [Pyrus x bretschneideri]	Pyrus_x_bretschneideri	40	4.3e-30
TRINITY_DN13857_c0_g2	XP_020576692.1	probable calcium-binding protein CML49 [Phalaenopsis equestris]	Phalaenopsis_equestris	42.8	6.3e-30
TRINITY_DN13858_c0_g1	KMS64890.1	hypothetical protein BVRB_041610, partial [Beta vulgaris subsp. vulgaris]	Beta_vulgaris	78.6	5e-12
TRINITY_DN13860_c0_g5	KRH62912.1	hypothetical protein GLYMA_04G141600 [Glycine max]	Glycine_max	37.8	1.3e-07
TRINITY_DN13860_c1_g3	XP_009149291.1	PREDICTED: plant cysteine oxidase 3 isoform X1 [Brassica rapa]	Brassica_rapa	38.4	1.4e-15
TRINITY_DN13860_c1_g4	XP_004248345.1	vacuolar protein sorting-associated protein 22 homolog 1 [Solanum lycopersicum]	Solanum_lycopersicum	53.8	1.2e-51
TRINITY_DN13861_c3_g1	PNW77938.1	hypothetical protein CHLRE_10g457700v5 [Chlamydomonas reinhardtii]	Chlamydomonas_reinhardtii	48.5	1.3e-68
TRINITY_DN13863_c0_g1	XP_020179625.1	serine/threonine-protein kinase EDR1 [Aegilops tauschii subsp. tauschii]	Aegilops_tauschii	36.3	1.7e-33
TRINITY_DN13864_c0_g2	GAQ88391.1	serine carboxypeptidase [Klebsormidium nitens]	Klebsormidium_nitens	49	4e-117
TRINITY_DN13867_c1_g1	GAQ91546.1	Zn2+ transporter [Klebsormidium nitens]	Klebsormidium_nitens	53.1	3.1e-34
TRINITY_DN13869_c2_g1	PWA41826.1	hypothetical protein CTI12_AA550450 [Artemisia annua]	Artemisia_annua	49.5	1.7e-15
TRINITY_DN13873_c0_g1	KMS65245.1	hypothetical protein BVRB_037930, partial [Beta vulgaris subsp. vulgaris]	Beta_vulgaris	51.4	1.4e-07
TRINITY_DN13875_c0_g2	XP_019163863.1	PREDICTED: calmodulin-3-like [Ipomoea nil]	Ipomoea_nil	30.8	9.4e-07
TRINITY_DN13877_c1_g6	XP_002504592.1	ciliary protein [Micromonas commoda]	Micromonas_commoda	65.9	1.2e-58
TRINITY_DN13878_c1_g1	XP_024376810.1	cathepsin Z-like [Physcomitrella patens]	Physcomitrella_patens	42.9	1.1e-52
TRINITY_DN13878_c1_g2	XP_023902728.1	calcium-transporting ATPase 1-like [Quercus suber]	Quercus_suber	43.3	1.6e-186
TRINITY_DN13879_c2_g6	XP_023733697.1	mannosyl-oligosaccharide glucosidase GCS1 [Lactuca sativa]	Lactuca_sativa	44.1	2.6e-182
TRINITY_DN13881_c1_g1	XP_020092846.1	uncharacterized protein LOC109713256 [Ananas comosus]	Ananas_comosus	33.2	6.2e-135
TRINITY_DN13883_c3_g12	XP_001419103.1	predicted protein [Ostreococcus lucimarinus CCE9901]	Ostreococcus_sp._'lucimarinus'	74.4	2.3e-06
TRINITY_DN13883_c3_g2	GBG60525.1	hypothetical protein CBR_g5700 [Chara braunii]	Chara_braunii	33.6	7.3e-10
TRINITY_DN13883_c3_g3	XP_020087391.1	RHOMBOID-like protein 2 [Ananas comosus]	Ananas_comosus	30.3	4.6e-17
TRINITY_DN13884_c4_g4	XP_024377939.1	trafficking protein particle complex subunit 3-like [Physcomitrella patens]	Physcomitrella_patens	59.6	1.2e-06
TRINITY_DN13884_c5_g2	XP_002967710.1	guanine nucleotide-binding protein subunit beta [Selaginella moellendorffii]	Selaginella_moellendorffii	29.5	1e-22
TRINITY_DN13891_c3_g1	XP_024368000.1	eukaryotic translation initiation factor 3 subunit L-like [Physcomitrella patens]	Physcomitrella_patens	44.2	9.8e-118
TRINITY_DN13893_c2_g1	XP_024540608.1	probable protein disulfide-isomerase A6 [Selaginella moellendorffii]	Selaginella_moellendorffii	56.2	1.5e-63
TRINITY_DN13893_c2_g2	XP_023889339.1	protein disulfide-isomerase-like [Quercus suber]	Quercus_suber	36.7	9.1e-70
TRINITY_DN13893_c2_g3	XP_001418901.1	predicted protein [Ostreococcus lucimarinus CCE9901]	Ostreococcus_sp._'lucimarinus'	30.2	8.2e-85
TRINITY_DN13893_c3_g4	XP_023925505.1	syntaxin-22-like [Quercus suber]	Quercus_suber	25.8	9.9e-08
TRINITY_DN13894_c0_g1	AFK40303.1	unknown [Lotus japonicus]	Lotus_japonicus	56.4	1.5e-18
TRINITY_DN13896_c2_g4	XP_003056572.1	ras-related protein rab28-like protein [Micromonas pusilla CCMP1545]	Micromonas_pusilla	46.1	1.4e-55
TRINITY_DN13897_c0_g1	OAE20714.1	hypothetical protein AXG93_154s1880 [Marchantia polymorpha subsp. ruderalis]	Marchantia_polymorpha	26.5	6.1e-17
TRINITY_DN13897_c0_g2	XP_002976303.1	protein translation factor SUI1 homolog 2 isoform X1 [Selaginella moellendorffii]	Selaginella_moellendorffii	56.4	1.1e-29
TRINITY_DN13898_c3_g2	GAQ83394.1	inositol polyphosphate kinase [Klebsormidium nitens]	Klebsormidium_nitens	32	9.5e-13
TRINITY_DN13905_c3_g1	PHU14874.1	Protein-tyrosine-phosphatase PTP1 [Capsicum chinense]	Capsicum_chinense	39.7	4.3e-16
TRINITY_DN13909_c0_g1	RWR97784.1	hypothetical protein CKAN_02724000 [Cinnamomum micranthum f. kanehirae]	Cinnamomum_micranthum	58.2	9.5e-20
TRINITY_DN13909_c0_g2	KMS94002.1	hypothetical protein BVRB_025780, partial [Beta vulgaris subsp. vulgaris]	Beta_vulgaris	58	2.4e-11
TRINITY_DN13909_c0_g4	YP_009532855.1	hypothetical protein (mitochondrion) [Glycine soja]	Glycine_soja	67.5	2.4e-18
TRINITY_DN13909_c0_g5	OMP07187.1	hypothetical protein CCACVL1_01356 [Corchorus capsularis]	Corchorus_capsularis	65.2	2e-14
TRINITY_DN13910_c0_g1	XP_012450430.1	PREDICTED: glycoprotein 3-alpha-L-fucosyltransferase A-like [Gossypium raimondii]	Gossypium_raimondii	35.6	1.7e-19
TRINITY_DN13911_c1_g1	XP_023898382.1	kinesin heavy chain-like [Quercus suber]	Quercus_suber	44.4	2.9e-47
TRINITY_DN13912_c0_g1	XP_023929170.1	ras-related C3 botulinum toxin substrate 1-like isoform X2 [Quercus suber]	Quercus_suber	51	9.6e-24
TRINITY_DN13912_c1_g1	XP_023929170.1	ras-related C3 botulinum toxin substrate 1-like isoform X2 [Quercus suber]	Quercus_suber	65.8	1.3e-73
TRINITY_DN13916_c0_g3	XP_024398716.1	protein ZINC INDUCED FACILITATOR-LIKE 1-like isoform X3 [Physcomitrella patens]	Physcomitrella_patens	24.5	1.1e-26
TRINITY_DN13917_c0_g1	PIA33632.1	hypothetical protein AQUCO_04100211v1 [Aquilegia coerulea]	Aquilegia_coerulea	37.3	3.8e-16
TRINITY_DN13920_c0_g2	XP_011070032.1	proteasome subunit alpha type-3 [Sesamum indicum]	Sesamum_indicum	56.2	3.9e-78
TRINITY_DN13923_c0_g7	PNT25198.2	hypothetical protein POPTR_008G172800 [Populus trichocarpa]	Populus_trichocarpa	46.1	3.5e-150
TRINITY_DN13928_c1_g4	XP_005647478.1	hypothetical protein COCSUDRAFT_83706 [Coccomyxa subellipsoidea C-169]	Coccomyxa_subellipsoidea	30	1.4e-14
TRINITY_DN13929_c0_g1	XP_010057948.1	PREDICTED: phospholipase A I [Eucalyptus grandis]	Eucalyptus_grandis	44.2	1.4e-12
TRINITY_DN13929_c1_g1	XP_023754310.1	zinc finger MYM-type protein 1-like, partial [Lactuca sativa]	Lactuca_sativa	41.3	6.6e-18
TRINITY_DN13930_c3_g6	PSC70346.1	Cycloartenol synthase isoform A [Micractinium conductrix]	Micractinium_conductrix	58	1.6e-28
TRINITY_DN13931_c3_g3	GAQ83784.1	RNA-binding protein Nova-1 [Klebsormidium nitens]	Klebsormidium_nitens	28.4	2e-32
TRINITY_DN13936_c1_g1	XP_010679178.1	PREDICTED: ankyrin repeat and protein kinase domain-containing protein 1-like isoform X1 [Beta vulgaris subsp. vulgaris]	Beta_vulgaris	26.2	6.3e-08
TRINITY_DN13936_c1_g2	XP_023736039.1	RNA-binding protein 25 isoform X2 [Lactuca sativa]	Lactuca_sativa	32.7	3e-23
TRINITY_DN13937_c0_g1	XP_001419906.1	predicted protein [Ostreococcus lucimarinus CCE9901]	Ostreococcus_sp._'lucimarinus'	56.3	2.4e-14
TRINITY_DN13937_c0_g3	GAQ87689.1	AAA-type ATPase family protein [Klebsormidium nitens]	Klebsormidium_nitens	49.7	1.3e-35
TRINITY_DN13937_c0_g4	KXZ44992.1	hypothetical protein GPECTOR_60g771 [Gonium pectorale]	Gonium_pectorale	61.7	6.1e-27
TRINITY_DN13938_c0_g2	RID57788.1	hypothetical protein BRARA_F01140 [Brassica rapa]	Brassica_rapa	43.1	2.1e-66
TRINITY_DN13941_c1_g5	PRW60433.1	ATP-dependent RNA helicase DDX1 [Chlorella sorokiniana]	Chlorella_sorokiniana	32.7	5.6e-20
TRINITY_DN13942_c0_g3	XP_002992164.1	serine-threonine kinase receptor-associated protein [Selaginella moellendorffii]	Selaginella_moellendorffii	54.8	2.3e-89
TRINITY_DN13942_c0_g4	XP_005844202.1	hypothetical protein CHLNCDRAFT_56335 [Chlorella variabilis]	Chlorella_variabilis	58.7	6.4e-102
TRINITY_DN13945_c0_g3	KVH87460.1	Ribosomal protein S19A/S15e [Cynara cardunculus var. scolymus]	Cynara_cardunculus	83	5.6e-43
TRINITY_DN13945_c1_g2	OAE25132.1	hypothetical protein AXG93_3217s1490 [Marchantia polymorpha subsp. ruderalis]	Marchantia_polymorpha	46.8	3.4e-172
TRINITY_DN13945_c1_g3	XP_019168606.1	PREDICTED: proline--tRNA ligase, cytoplasmic-like isoform X2 [Ipomoea nil]	Ipomoea_nil	57.7	6.6e-170
TRINITY_DN13946_c0_g1	GAQ80636.1	Ketoacyl-CoA reductase [Klebsormidium nitens]	Klebsormidium_nitens	39.3	6.6e-50
TRINITY_DN13947_c0_g1	XP_002949003.1	hypothetical protein VOLCADRAFT_89444 [Volvox carteri f. nagariensis]	Volvox_carteri	29.4	8.9e-12
TRINITY_DN13948_c2_g1	PKA57277.1	Dynein assembly factor with WDR repeat domains 1 [Apostasia shenzhenica]	Apostasia_shenzhenica	28.8	1.1e-12
TRINITY_DN13949_c1_g3	QBB88965.1	NADH dehydrogenase subunit 7 (mitochondrion) [Micractinium sp. LBA 32]	Micractinium_sp._LBA_32	68.5	4.7e-108
TRINITY_DN13949_c1_g9	YP_009138110.1	NADH dehydrogenase subunit 7 (mitochondrion) [Lobosphaera incisa]	Lobosphaera_incisa	69.9	2.1e-55
TRINITY_DN13950_c0_g1	YP_009526576.1	hypothetical protein (mitochondrion) [Ammopiptanthus mongolicus]	Ammopiptanthus_mongolicus	85.5	2.4e-33
TRINITY_DN13950_c0_g12	YP_009526577.1	hypothetical protein (mitochondrion) [Ammopiptanthus mongolicus]	Ammopiptanthus_mongolicus	74.5	1.1e-08
TRINITY_DN13950_c0_g14	EXC33548.1	putative mitochondrial protein [Morus notabilis]	Morus_notabilis	78.9	7.1e-13
TRINITY_DN13950_c0_g15	RYQ91059.1	hypothetical protein Ahy_B09g096927 [Arachis hypogaea]	Arachis_hypogaea	93.6	1.2e-32
TRINITY_DN13950_c0_g6	YP_004222262.1	NADH dehydrogenase subunit 1 (mitochondrion) [Beta vulgaris subsp. maritima]	Beta_vulgaris	100	1.3e-20
TRINITY_DN13950_c0_g8	CAC80477.1	cytochrome oxidase subunit I, partial (mitochondrion) [Viola sp. Qiu 95018]	Viola_sp._Qiu_95018	100	4.7e-49
TRINITY_DN13950_c0_g9	KMS65473.1	hypothetical protein BVRB_035640 [Beta vulgaris subsp. vulgaris]	Beta_vulgaris	71.1	5.7e-09
TRINITY_DN13953_c0_g5	AXH37939.1	ribosomal protein L20 (chloroplast) [Chlamydomonas sp. ICE-L]	Chlamydomonas_sp._ICE-L	57.5	5.7e-24
TRINITY_DN13953_c1_g2	XP_021656596.1	transducin beta-like protein 3 isoform X3 [Hevea brasiliensis]	Hevea_brasiliensis	52.6	2.7e-32
TRINITY_DN13953_c2_g1	XP_001689826.1	3',5'-cyclic-nucleotide phosphodiesterase [Chlamydomonas reinhardtii]	Chlamydomonas_reinhardtii	38.9	2.9e-29
TRINITY_DN13954_c3_g2	XP_002506734.1	predicted protein [Micromonas commoda]	Micromonas_commoda	63.2	1.1e-48
TRINITY_DN13955_c1_g2	GAQ85398.1	hypothetical protein KFL_002330080 [Klebsormidium nitens]	Klebsormidium_nitens	32.8	2.3e-34
TRINITY_DN13957_c0_g1	PON64098.1	43kDa postsynaptic protein [Trema orientale]	Trema_orientale	50	5.9e-08
TRINITY_DN13960_c0_g10	PKI33291.1	hypothetical protein CRG98_046318 [Punica granatum]	Punica_granatum	66	5e-07
TRINITY_DN13960_c0_g2	KMS65430.1	hypothetical protein BVRB_036070 [Beta vulgaris subsp. vulgaris]	Beta_vulgaris	70.2	1.3e-13
TRINITY_DN13960_c0_g4	PHU28465.1	hypothetical protein BC332_00558 [Capsicum chinense]	Capsicum_chinense	66.7	1.8e-07
TRINITY_DN13960_c0_g9	RWW77781.1	hypothetical protein BHE74_00014019 [Ensete ventricosum]	Ensete_ventricosum	86.7	7.9e-16
TRINITY_DN13962_c2_g7	XP_024542018.1	carboxypeptidase SOL1 [Selaginella moellendorffii]	Selaginella_moellendorffii	46.7	9.8e-73
TRINITY_DN13963_c0_g3	XP_024371109.1	trafficking protein particle complex subunit 13-like [Physcomitrella patens]	Physcomitrella_patens	32.3	2e-35
TRINITY_DN13964_c0_g1	ERM95120.1	hypothetical protein AMTR_s00009p00259240 [Amborella trichopoda]	Amborella_trichopoda	34.6	3.1e-41
TRINITY_DN13966_c0_g2	GAX80591.1	hypothetical protein CEUSTIGMA_g8028.t1 [Chlamydomonas eustigma]	Chlamydomonas_eustigma	33.2	5.7e-60
TRINITY_DN13969_c0_g1	XP_023889219.1	saccharopine dehydrogenase [NADP(+), L-glutamate-forming]-like [Quercus suber]	Quercus_suber	44.1	1.1e-88
TRINITY_DN13971_c3_g3	NP_001169968.1	signal recognition particle 14 kDa protein isoform 2 [Zea mays]	Zea_mays	40	7.5e-11
TRINITY_DN13971_c4_g11	BAK02675.1	predicted protein [Hordeum vulgare subsp. vulgare]	Hordeum_vulgare	56.7	3e-101
TRINITY_DN13971_c4_g2	GAQ82654.1	RNA-binding ASCH domain protein [Klebsormidium nitens]	Klebsormidium_nitens	56	6.2e-41
TRINITY_DN13971_c4_g3	QBB20011.1	putative calcium dependent protein kinase [Ettlia sp. YC001]	Ettlia_sp._YC001	35.1	4.1e-43
TRINITY_DN13971_c4_g5	GBG65145.1	hypothetical protein CBR_g49507 [Chara braunii]	Chara_braunii	56.2	6.5e-18
TRINITY_DN13973_c4_g2	XP_024377275.1	nuclear pore complex protein NUP93A-like [Physcomitrella patens]	Physcomitrella_patens	22.4	1.3e-38
TRINITY_DN13977_c0_g2	PRW33943.1	acyl- dehydrogenase family member 11-like [Chlorella sorokiniana]	Chlorella_sorokiniana	39.5	1.4e-20
TRINITY_DN13978_c2_g3	XP_024356503.1	uncharacterized protein LOC112272703 [Physcomitrella patens]	Physcomitrella_patens	40.5	4.7e-39
TRINITY_DN13979_c1_g6	XP_011016699.1	PREDICTED: uncharacterized protein K02A2.6-like, partial [Populus euphratica]	Populus_euphratica	47.5	7.6e-46
TRINITY_DN13982_c0_g1	XP_003062761.1	predicted protein [Micromonas pusilla CCMP1545]	Micromonas_pusilla	45.5	1.8e-58
TRINITY_DN13983_c2_g1	CDP09884.1	unnamed protein product [Coffea canephora]	Coffea_canephora	35	6.5e-12
TRINITY_DN13983_c3_g2	GBG73951.1	hypothetical protein CBR_g17666 [Chara braunii]	Chara_braunii	34.2	4.4e-39
TRINITY_DN13983_c3_g5	PSC75334.1	Endonuclease exonuclease phosphatase family isoform B [Micractinium conductrix]	Micractinium_conductrix	29	1.1e-14
TRINITY_DN13984_c0_g1	XP_012069440.1	serine/arginine-rich SC35-like splicing factor SCL28 [Jatropha curcas]	Jatropha_curcas	46.3	1.3e-12
TRINITY_DN13986_c0_g2	XP_003058803.1	predicted protein [Micromonas pusilla CCMP1545]	Micromonas_pusilla	50.5	1.5e-20
TRINITY_DN13986_c0_g6	GAQ89036.1	DNA replication licensing factor MCM7 component [Klebsormidium nitens]	Klebsormidium_nitens	48.9	4.5e-192
TRINITY_DN13987_c2_g1	PTQ46169.1	hypothetical protein MARPO_0012s0112 [Marchantia polymorpha]	Marchantia_polymorpha	32.4	4.9e-36
TRINITY_DN13987_c2_g16	AHG59185.1	ribosomal protein S11 (mitochondrion) [Andreaea rothii]	Andreaea_rothii	57.1	7e-12
TRINITY_DN13987_c2_g3	GAQ85969.1	threonine dehydratase [Klebsormidium nitens]	Klebsormidium_nitens	54.1	6.6e-112
TRINITY_DN13987_c2_g9	YP_009019921.1	ribosomal protein S11 (chloroplast) [Azadirachta indica]	Azadirachta_indica	47.6	8.7e-08
TRINITY_DN13990_c3_g3	XP_006657790.1	PREDICTED: glycerol-3-phosphate acyltransferase 3 [Oryza brachyantha]	Oryza_brachyantha	39.7	1.5e-68
TRINITY_DN13992_c0_g3	XP_016174611.1	signal recognition particle 54 kDa protein 2 isoform X1 [Arachis ipaensis]	Arachis_ipaensis	60.7	3.3e-154
TRINITY_DN13994_c4_g1	PIN26243.1	Molecular chaperone (DnaJ superfamily) [Handroanthus impetiginosus]	Handroanthus_impetiginosus	48	4.6e-19
TRINITY_DN13994_c4_g2	XP_002953291.1	hypothetical protein VOLCADRAFT_94094 [Volvox carteri f. nagariensis]	Volvox_carteri	31.9	9.9e-14
TRINITY_DN13997_c0_g1	GAQ81424.1	NLI interacting factor-like phosphatase [Klebsormidium nitens]	Klebsormidium_nitens	59.1	2.1e-36
TRINITY_DN13999_c1_g1	XP_003057053.1	ring PHD family protein [Micromonas pusilla CCMP1545]	Micromonas_pusilla	32.2	1.9e-14
TRINITY_DN13999_c2_g4	XP_022022966.1	ELMO domain-containing protein B-like [Helianthus annuus]	Helianthus_annuus	29.9	4.4e-14
TRINITY_DN14000_c0_g1	GAX85625.1	hypothetical protein CEUSTIGMA_g13040.t1 [Chlamydomonas eustigma]	Chlamydomonas_eustigma	46.2	6.1e-55
TRINITY_DN14002_c1_g1	BAJ11784.1	dehydration responsive protein, partial [Corchorus olitorius]	Corchorus_olitorius	46.8	2.7e-11
TRINITY_DN14002_c1_g2	BAJ11784.1	dehydration responsive protein, partial [Corchorus olitorius]	Corchorus_olitorius	43.1	4.8e-08
TRINITY_DN14007_c0_g1	KMS64936.1	hypothetical protein BVRB_041110, partial [Beta vulgaris subsp. vulgaris]	Beta_vulgaris	65.8	2.4e-18
TRINITY_DN14008_c0_g3	GAQ85861.1	MATE efflux family protein [Klebsormidium nitens]	Klebsormidium_nitens	34.5	3.3e-19
TRINITY_DN14008_c0_g5	PSS24825.1	Aminomethyltransferaseprecursor [Actinidia chinensis var. chinensis]	Actinidia_chinensis	28.1	6.8e-17
TRINITY_DN14008_c0_g6	PWA47128.1	decapping 2 [Artemisia annua]	Artemisia_annua	36.5	6.2e-43
TRINITY_DN14008_c0_g7	RZR82199.1	hypothetical protein BHM03_00008565 [Ensete ventricosum]	Ensete_ventricosum	31	1.1e-11
TRINITY_DN14009_c2_g2	RWW84243.1	hypothetical protein BHE74_00007142 [Ensete ventricosum]	Ensete_ventricosum	42	2.5e-71
TRINITY_DN14010_c1_g1	XP_008651233.1	probable RNA helicase SDE3 [Zea mays]	Zea_mays	29.1	5.6e-26
TRINITY_DN14010_c2_g1	XP_021806662.1	RNA polymerase II transcription factor B subunit 4 [Prunus avium]	Prunus_avium	36.4	3.7e-39
TRINITY_DN14010_c2_g3	KXZ50907.1	hypothetical protein GPECTOR_14g154 [Gonium pectorale]	Gonium_pectorale	38.1	2.2e-11
TRINITY_DN14010_c2_g4	XP_023925432.1	phosphatidylinositol 4-kinase lsb6-like [Quercus suber]	Quercus_suber	35.3	4.7e-54
TRINITY_DN14011_c0_g1	KMS64820.1	hypothetical protein BVRB_042330 [Beta vulgaris subsp. vulgaris]	Beta_vulgaris	72.3	6.8e-07
TRINITY_DN14012_c1_g2	XP_006290029.1	TOG array regulator of axonemal microtubules protein 1 [Capsella rubella]	Capsella_rubella	30.9	4.6e-15
TRINITY_DN14012_c1_g4	XP_012072762.1	pathogenesis-related protein 1 [Jatropha curcas]	Jatropha_curcas	40.3	5.7e-21
TRINITY_DN14013_c1_g1	RXH86022.1	hypothetical protein DVH24_017075 [Malus domestica]	Malus_domestica	43.7	1.4e-10
TRINITY_DN14016_c2_g3	XP_006368405.2	mitochondrial carnitine/acylcarnitine carrier-like protein isoform X2 [Populus trichocarpa]	Populus_trichocarpa	41.4	3.5e-54
TRINITY_DN14017_c1_g3	XP_024531591.1	N-terminal acetyltransferase A complex auxiliary subunit NAA15 [Selaginella moellendorffii]	Selaginella_moellendorffii	45.6	4.3e-168
TRINITY_DN14019_c4_g1	PRW60562.1	kelch 10 [Chlorella sorokiniana]	Chlorella_sorokiniana	22.9	2.4e-21
TRINITY_DN14020_c1_g2	XP_002957684.1	hypothetical protein VOLCADRAFT_68493 [Volvox carteri f. nagariensis]	Volvox_carteri	34.2	6.9e-68
TRINITY_DN14020_c1_g4	XP_017243486.1	PREDICTED: cytochrome P450 714A1-like [Daucus carota subsp. sativus]	Daucus_carota	23.8	1.4e-25
TRINITY_DN14023_c3_g1	OEL33336.1	BTB/POZ and MATH domain-containing protein 2 [Dichanthelium oligosanthes]	Dichanthelium_oligosanthes	30.4	1.1e-12
TRINITY_DN14028_c0_g1	BAK02238.1	predicted protein [Hordeum vulgare subsp. vulgare]	Hordeum_vulgare	47.1	1.7e-33
TRINITY_DN14028_c1_g1	GBG82336.1	hypothetical protein CBR_g34620 [Chara braunii]	Chara_braunii	45.4	1.7e-84
TRINITY_DN1402_c0_g1	PHT34850.1	hypothetical protein CQW23_26650 [Capsicum baccatum]	Capsicum_baccatum	27.2	2.2e-22
TRINITY_DN14030_c4_g1	GAX77292.1	hypothetical protein CEUSTIGMA_g4738.t1 [Chlamydomonas eustigma]	Chlamydomonas_eustigma	52.6	2.6e-35
TRINITY_DN14030_c6_g3	XP_009351097.1	PREDICTED: notchless protein homolog 1-like [Pyrus x bretschneideri]	Pyrus_x_bretschneideri	60.4	4.2e-41
TRINITY_DN14031_c0_g1	KXZ42105.1	hypothetical protein GPECTOR_203g377 [Gonium pectorale]	Gonium_pectorale	31	5.2e-07
TRINITY_DN14031_c0_g3	XP_020083028.1	serine/threonine-protein kinase HT1-like [Ananas comosus]	Ananas_comosus	33.6	1.5e-37
TRINITY_DN14032_c0_g5	XP_009351165.1	PREDICTED: DNA replication licensing factor Mcm2-like [Pyrus x bretschneideri]	Pyrus_x_bretschneideri	52.3	5.8e-50
TRINITY_DN14034_c0_g3	BAJ95850.1	predicted protein [Hordeum vulgare subsp. vulgare]	Hordeum_vulgare	38.7	1.4e-84
TRINITY_DN14036_c3_g1	GBG75741.1	hypothetical protein CBR_g20988 [Chara braunii]	Chara_braunii	34.7	1.4e-90
TRINITY_DN14040_c0_g1	GAQ86726.1	serine carboxypeptidase-like [Klebsormidium nitens]	Klebsormidium_nitens	56	3.4e-52
TRINITY_DN14045_c0_g1	XP_024368148.1	uncharacterized FAD-linked oxidoreductase ARB_02478-like [Physcomitrella patens]	Physcomitrella_patens	38	1.3e-97
TRINITY_DN14045_c1_g11	XP_024368148.1	uncharacterized FAD-linked oxidoreductase ARB_02478-like [Physcomitrella patens]	Physcomitrella_patens	42.9	8.4e-37
TRINITY_DN14045_c1_g2	B8AY58.1	RecName: Full=Villin-1	Oryza_sativa	26.6	4.5e-24
TRINITY_DN14045_c1_g4	XP_024368148.1	uncharacterized FAD-linked oxidoreductase ARB_02478-like [Physcomitrella patens]	Physcomitrella_patens	37.8	2.7e-51
TRINITY_DN14046_c4_g5	GAQ77855.1	S1 RNA binding domain containing protein [Klebsormidium nitens]	Klebsormidium_nitens	28.8	3.1e-159
TRINITY_DN14051_c1_g2	XP_026432706.1	copper transporter 1-like [Papaver somniferum]	Papaver_somniferum	31.2	4.7e-07
TRINITY_DN14051_c2_g3	XP_010665572.1	PREDICTED: vacuolar protein sorting-associated protein 20 homolog 2 [Beta vulgaris subsp. vulgaris]	Beta_vulgaris	44	5.7e-26
TRINITY_DN14052_c0_g4	PRW59003.1	thymidylate kinase-like isoform X2 [Chlorella sorokiniana]	Chlorella_sorokiniana	52.9	2.3e-55
TRINITY_DN14055_c2_g3	GBG78683.1	hypothetical protein CBR_g27907 [Chara braunii]	Chara_braunii	39.4	8.7e-11
TRINITY_DN14055_c3_g3	PIM97578.1	DHHC-type Zn-finger protein [Handroanthus impetiginosus]	Handroanthus_impetiginosus	38.9	1.3e-33
TRINITY_DN14057_c1_g1	GAX75726.1	hypothetical protein CEUSTIGMA_g3169.t1 [Chlamydomonas eustigma]	Chlamydomonas_eustigma	52.1	2e-48
TRINITY_DN14057_c2_g1	GAX81933.1	hypothetical protein CEUSTIGMA_g9361.t1 [Chlamydomonas eustigma]	Chlamydomonas_eustigma	32.3	1.2e-31
TRINITY_DN14058_c0_g2	XP_020150972.1	dolichyl-diphosphooligosaccharide--protein glycosyltransferase subunit STT3B [Aegilops tauschii subsp. tauschii]	Aegilops_tauschii	64.4	5.3e-142
TRINITY_DN14060_c1_g1	XP_023905230.1	myosin-1-like [Quercus suber]	Quercus_suber	45.1	1.1e-54
TRINITY_DN14060_c2_g3	XP_006644066.1	PREDICTED: ERI1 exoribonuclease 2-like [Oryza brachyantha]	Oryza_brachyantha	38.9	2.7e-34
TRINITY_DN14060_c2_g4	XP_023871254.1	isopenicillin N epimerase component 2-like [Quercus suber]	Quercus_suber	54.1	3.9e-44
TRINITY_DN14060_c2_g8	AKM76598.1	polynucleotidyl transferase ribonuclease H-like superfamily protein [Melianthus villosus]	Melianthus_villosus	33	9.4e-13
TRINITY_DN14062_c0_g12	XP_024381177.1	uncharacterized protein LOC112284981 [Physcomitrella patens]	Physcomitrella_patens	36	2.3e-17
TRINITY_DN14062_c0_g14	GAQ78566.1	putative protease [Klebsormidium nitens]	Klebsormidium_nitens	55.9	4.1e-60
TRINITY_DN14062_c0_g2	GAQ78566.1	putative protease [Klebsormidium nitens]	Klebsormidium_nitens	53.8	1.2e-90
TRINITY_DN14062_c0_g6	AAD27571.1	polyprotein [Sorghum bicolor]	Sorghum_bicolor	41.4	1.6e-16
TRINITY_DN14062_c0_g8	PTQ48075.1	hypothetical protein MARPO_0006s0107, partial [Marchantia polymorpha]	Marchantia_polymorpha	45.1	3.3e-18
TRINITY_DN14062_c0_g9	GAQ78566.1	putative protease [Klebsormidium nitens]	Klebsormidium_nitens	50	4.7e-19
TRINITY_DN14063_c2_g6	XP_005649096.1	glycoside hydrolase, partial [Coccomyxa subellipsoidea C-169]	Coccomyxa_subellipsoidea	54.4	1.4e-93
TRINITY_DN14065_c1_g1	GBG59279.1	hypothetical protein CBR_g32294 [Chara braunii]	Chara_braunii	60.1	4.2e-104
TRINITY_DN14065_c2_g8	BAJ99429.1	predicted protein [Hordeum vulgare subsp. vulgare]	Hordeum_vulgare	41.2	3.7e-42
TRINITY_DN14066_c1_g7	OAE25240.1	hypothetical protein AXG93_1420s1030 [Marchantia polymorpha subsp. ruderalis]	Marchantia_polymorpha	29.5	6.5e-37
TRINITY_DN14071_c0_g3	EFJ11209.1	hypothetical protein SELMODRAFT_269295 [Selaginella moellendorffii]	Selaginella_moellendorffii	32.7	3.9e-66
TRINITY_DN14071_c0_g5	KXZ46795.1	TOG1 protein [Gonium pectorale]	Gonium_pectorale	41.2	8.1e-18
TRINITY_DN14075_c0_g1	ACF84987.1	unknown [Zea mays]	Zea_mays	70.6	3e-139
TRINITY_DN14076_c3_g1	XP_024372585.1	autocrine proliferation repressor protein A-like [Physcomitrella patens]	Physcomitrella_patens	36.5	3e-42
TRINITY_DN14076_c3_g5	XP_024538594.1	ras-related protein RABE1c [Selaginella moellendorffii]	Selaginella_moellendorffii	49.2	2.4e-31
TRINITY_DN14076_c3_g6	PWA80994.1	hypothetical protein CTI12_AA190310 [Artemisia annua]	Artemisia_annua	33.1	8.4e-16
TRINITY_DN14077_c0_g2	XP_020276668.1	ribose-phosphate pyrophosphokinase 4 [Asparagus officinalis]	Asparagus_officinalis	53.5	8.4e-85
TRINITY_DN14078_c1_g2	OAE25419.1	hypothetical protein AXG93_4620s2340 [Marchantia polymorpha subsp. ruderalis]	Marchantia_polymorpha	42.3	4e-47
TRINITY_DN14080_c0_g2	KMS94501.1	hypothetical protein BVRB_020780, partial [Beta vulgaris subsp. vulgaris]	Beta_vulgaris	68.4	1.6e-19
TRINITY_DN14082_c0_g1	GBG87220.1	hypothetical protein CBR_g45279 [Chara braunii]	Chara_braunii	42.2	1.6e-67
TRINITY_DN14082_c0_g2	OWM82546.1	hypothetical protein CDL15_Pgr002121 [Punica granatum]	Punica_granatum	76.8	1.4e-66
TRINITY_DN14082_c0_g3	KXZ56212.1	hypothetical protein GPECTOR_1g184 [Gonium pectorale]	Gonium_pectorale	39.2	2.9e-47
TRINITY_DN14084_c0_g1	XP_007510375.1	short chain dehydrogenase [Bathycoccus prasinos]	Bathycoccus_prasinos	41.8	5.7e-44
TRINITY_DN14089_c1_g1	PHU10125.1	hypothetical protein BC332_21985 [Capsicum chinense]	Capsicum_chinense	64.1	4.2e-06
TRINITY_DN14091_c0_g9	GBG58697.1	hypothetical protein CBR_g98 [Chara braunii]	Chara_braunii	44.7	2e-11
TRINITY_DN14092_c2_g1	XP_021273584.1	alpha-1,6-mannosyl-glycoprotein 2-beta-N-acetylglucosaminyltransferase [Herrania umbratica]	Herrania_umbratica	34.7	3.9e-50
TRINITY_DN14092_c2_g2	RWR80388.1	CCR4-Not complex component [Cinnamomum micranthum f. kanehirae]	Cinnamomum_micranthum	53.5	6.3e-34
TRINITY_DN14094_c1_g11	KZV26185.1	phosphatidylinositol 4-phosphate 5-kinase 9 [Dorcoceras hygrometricum]	Dorcoceras_hygrometricum	33	3.6e-41
TRINITY_DN14095_c1_g1	KMS93253.1	hypothetical protein BVRB_033340, partial [Beta vulgaris subsp. vulgaris]	Beta_vulgaris	71.1	6.7e-07
TRINITY_DN14097_c0_g3	GAQ88362.1	DNA replication licensing factor MCM2 component [Klebsormidium nitens]	Klebsormidium_nitens	60.1	2.1e-60
TRINITY_DN14098_c0_g1	XP_010542210.1	PREDICTED: phosphatidylserine decarboxylase proenzyme 1, mitochondrial isoform X1 [Tarenaya hassleriana]	Tarenaya_hassleriana	36.3	7.3e-37
TRINITY_DN14099_c1_g2	ONM02088.1	RNA methyltransferase family protein [Zea mays]	Zea_mays	37.6	8.9e-24
TRINITY_DN14102_c5_g1	XP_019194923.1	PREDICTED: ADP-ribosylation factor 1-like [Ipomoea nil]	Ipomoea_nil	62.7	2.5e-24
TRINITY_DN14102_c5_g3	XP_024400259.1	uncharacterized protein LOC112294227 [Physcomitrella patens]	Physcomitrella_patens	26.8	7.4e-19
TRINITY_DN14102_c5_g5	ONK64174.1	uncharacterized protein A4U43_C07F22860 [Asparagus officinalis]	Asparagus_officinalis	51.9	1.4e-11
TRINITY_DN14105_c4_g4	BAJ96624.1	predicted protein [Hordeum vulgare subsp. vulgare]	Hordeum_vulgare	58.7	2.7e-41
TRINITY_DN14106_c0_g1	XP_023912720.1	transcription initiation factor TFIID subunit 7-like [Quercus suber]	Quercus_suber	38.7	3e-14
TRINITY_DN14108_c0_g3	ACN41173.1	unknown [Picea sitchensis]	Picea_sitchensis	37.1	1.3e-23
TRINITY_DN14109_c2_g3	XP_010231726.1	serine/threonine-protein phosphatase BSL1 homolog isoform X1 [Brachypodium distachyon]	Brachypodium_distachyon	38.6	1e-46
TRINITY_DN14111_c3_g1	XP_001416429.1	[Ostreococcus lucimarinus CCE9901]	Ostreococcus_sp._'lucimarinus'	33	1.2e-20
TRINITY_DN14111_c3_g2	OUS42113.1	hypothetical protein BE221DRAFT_202033 [Ostreococcus tauri]	Ostreococcus_tauri	32	3.8e-39
TRINITY_DN14114_c3_g3	XP_020261073.1	ubiquitin-like modifier-activating enzyme 5 [Asparagus officinalis]	Asparagus_officinalis	54.3	1.2e-75
TRINITY_DN14116_c0_g1	KMZ73268.1	putative ATP-dependent clp protease ATP-binding subunit clpx [Zostera marina]	Zostera_marina	60.5	2.8e-19
TRINITY_DN14116_c0_g3	GAQ83120.1	hypothetical protein KFL_001360170 [Klebsormidium nitens]	Klebsormidium_nitens	40.3	1.2e-44
TRINITY_DN14119_c0_g2	PTQ42624.1	hypothetical protein MARPO_0029s0125 [Marchantia polymorpha]	Marchantia_polymorpha	56.6	6e-106
TRINITY_DN14120_c3_g2	XP_022840690.1	Ribose-phosphate diphosphokinase [Ostreococcus tauri]	Ostreococcus_tauri	32.1	9.1e-37
TRINITY_DN14121_c3_g10	XP_023899506.1	NADPH--cytochrome P450 reductase-like [Quercus suber]	Quercus_suber	42.6	5.7e-31
TRINITY_DN14121_c3_g2	GAQ78920.1	Phospholipase B domain-containing protein [Klebsormidium nitens]	Klebsormidium_nitens	38.4	3.1e-103
TRINITY_DN14121_c3_g6	XP_023754310.1	zinc finger MYM-type protein 1-like, partial [Lactuca sativa]	Lactuca_sativa	55.2	7e-14
TRINITY_DN14127_c2_g1	XP_013898655.1	Translation initiation factor eIF-2B subunit alpha [Monoraphidium neglectum]	Monoraphidium_neglectum	49	4.2e-69
TRINITY_DN14127_c3_g1	OMO79108.1	Zinc finger, FYVE-type [Corchorus olitorius]	Corchorus_olitorius	28.4	1.1e-68
TRINITY_DN14128_c3_g1	GAX82583.1	hypothetical protein CEUSTIGMA_g10009.t1 [Chlamydomonas eustigma]	Chlamydomonas_eustigma	44.1	1.2e-94
TRINITY_DN14128_c3_g9	XP_023519947.1	26S proteasome non-ATPase regulatory subunit 6 homolog [Cucurbita pepo subsp. pepo]	Cucurbita_pepo	48.4	3e-97
TRINITY_DN1412_c0_g1	GBG69193.1	hypothetical protein CBR_g3892 [Chara braunii]	Chara_braunii	27.9	4.2e-48
TRINITY_DN14131_c0_g1	PRW32515.1	regulatory-associated of TOR 1 [Chlorella sorokiniana]	Chlorella_sorokiniana	59.9	5.4e-120
TRINITY_DN14131_c0_g4	XP_009373118.1	PREDICTED: regulatory-associated protein of TOR 1-like [Pyrus x bretschneideri]	Pyrus_x_bretschneideri	27.6	3.4e-76
TRINITY_DN14134_c3_g3	XP_015082497.1	organic cation/carnitine transporter 7 [Solanum pennellii]	Solanum_pennellii	26.2	1.9e-28
TRINITY_DN14137_c0_g1	XP_023903015.1	mitogen-activated protein kinase-like isoform X2 [Quercus suber]	Quercus_suber	49.4	1.1e-12
TRINITY_DN14137_c2_g4	XP_003059282.1	predicted protein [Micromonas pusilla CCMP1545]	Micromonas_pusilla	57.9	1.6e-45
TRINITY_DN14137_c2_g6	XP_019457268.1	PREDICTED: mitogen-activated protein kinase 9-like [Lupinus angustifolius]	Lupinus_angustifolius	51.1	4.9e-06
TRINITY_DN14140_c0_g2	ABK25196.1	unknown [Picea sitchensis]	Picea_sitchensis	45.8	1.5e-12
TRINITY_DN14140_c0_g3	XP_013899756.1	H/ACA ribonucleoprotein complex subunit 1 [Monoraphidium neglectum]	Monoraphidium_neglectum	70.8	2.8e-34
TRINITY_DN14141_c0_g2	XP_011396878.1	Sn1-specific diacylglycerol lipase beta [Auxenochlorella protothecoides]	Auxenochlorella_protothecoides	24.8	1.4e-33
TRINITY_DN14142_c0_g1	GBF90046.1	GDP-mannose 4,6-dehydratase [Raphidocelis subcapitata]	Raphidocelis_subcapitata	66.1	8.3e-100
TRINITY_DN14142_c0_g3	BAK02186.1	predicted protein [Hordeum vulgare subsp. vulgare]	Hordeum_vulgare	77.9	2.3e-279
TRINITY_DN14142_c0_g6	BAK02186.1	predicted protein [Hordeum vulgare subsp. vulgare]	Hordeum_vulgare	77.7	1.1e-110
TRINITY_DN14142_c0_g7	XP_024542551.1	NFX1-type zinc finger-containing protein 1 [Selaginella moellendorffii]	Selaginella_moellendorffii	33.8	1.7e-165
TRINITY_DN14143_c1_g1	XP_022742202.1	transmembrane protein 184A-like [Durio zibethinus]	Durio_zibethinus	41.5	6.5e-64
TRINITY_DN14143_c1_g4	XP_002975199.1	uncharacterized protein LOC9629059 [Selaginella moellendorffii]	Selaginella_moellendorffii	26.2	1.4e-20
TRINITY_DN14143_c1_g7	XP_003057399.1	predicted protein [Micromonas pusilla CCMP1545]	Micromonas_pusilla	32.4	3.1e-08
TRINITY_DN14148_c0_g1	GAQ85904.1	hypothetical protein KFL_002600120 [Klebsormidium nitens]	Klebsormidium_nitens	35.4	1.6e-54
TRINITY_DN14149_c0_g1	PLY98863.1	hypothetical protein LSAT_5X10060 [Lactuca sativa]	Lactuca_sativa	56.2	8.3e-19
TRINITY_DN14149_c0_g5	CBI34312.3	unnamed protein product, partial [Vitis vinifera]	Vitis_vinifera	54.3	2.1e-17
TRINITY_DN14151_c4_g1	XP_023926158.1	RNA polymerase II subunit A C-terminal domain phosphatase-like [Quercus suber]	Quercus_suber	40.3	2.2e-40
TRINITY_DN14152_c0_g3	XP_010922154.1	PREDICTED: ABC transporter A family member 1 isoform X1 [Elaeis guineensis]	Elaeis_guineensis	31.1	2.6e-24
TRINITY_DN14154_c0_g1	XP_027164812.1	long chain acyl-CoA synthetase 1-like isoform X1 [Coffea eugenioides]	Coffea_eugenioides	43.1	2.3e-45
TRINITY_DN14155_c0_g2	PTQ41948.1	hypothetical protein MARPO_0032s0120 [Marchantia polymorpha]	Marchantia_polymorpha	36.1	3.9e-26
TRINITY_DN14156_c0_g1	BAK02675.1	predicted protein [Hordeum vulgare subsp. vulgare]	Hordeum_vulgare	44.5	3.5e-70
TRINITY_DN14156_c0_g2	BAK02675.1	predicted protein [Hordeum vulgare subsp. vulgare]	Hordeum_vulgare	44	5.7e-73
TRINITY_DN14158_c2_g3	XP_024515756.1	eukaryotic peptide chain release factor GTP-binding subunit ERF3A isoform X4 [Selaginella moellendorffii]	Selaginella_moellendorffii	49.6	1.9e-26
TRINITY_DN14158_c2_g4	BAK03491.1	predicted protein [Hordeum vulgare subsp. vulgare]	Hordeum_vulgare	53.1	4e-101
TRINITY_DN14158_c2_g6	GAQ78384.1	Translation elongation factor EF1A [Klebsormidium nitens]	Klebsormidium_nitens	63	5.7e-110
TRINITY_DN14158_c3_g1	GAV83797.1	zf-RING_2 domain-containing protein [Cephalotus follicularis]	Cephalotus_follicularis	51.9	3.7e-07
TRINITY_DN14161_c3_g1	XP_016572794.1	PREDICTED: sulfhydryl oxidase 2 [Capsicum annuum]	Capsicum_annuum	41.4	1.6e-26
TRINITY_DN14161_c4_g1	XP_019418411.1	PREDICTED: annexin D8-like [Lupinus angustifolius]	Lupinus_angustifolius	40.3	1.7e-16
TRINITY_DN14162_c3_g4	XP_023902725.1	cell cycle serine/threonine-protein kinase hsk1-like [Quercus suber]	Quercus_suber	30.8	2.7e-38
TRINITY_DN14163_c3_g5	PTQ37898.1	hypothetical protein MARPO_0054s0015 [Marchantia polymorpha]	Marchantia_polymorpha	34.1	9.4e-91
TRINITY_DN14164_c3_g1	XP_002957740.1	hypothetical protein VOLCADRAFT_107794 [Volvox carteri f. nagariensis]	Volvox_carteri	40.4	1.5e-30
TRINITY_DN14165_c0_g1	XP_010421149.1	PREDICTED: katanin p80 WD40 repeat-containing subunit B1 homolog isoform X4 [Camelina sativa]	Camelina_sativa	24.3	7.2e-21
TRINITY_DN14168_c0_g2	RWR93144.1	1,2-dihydroxy-3-keto-5-methylthiopentene dioxygenase 2 [Cinnamomum micranthum f. kanehirae]	Cinnamomum_micranthum	66.5	1.4e-68
TRINITY_DN14170_c0_g2	XP_020163531.1	probable histone deacetylase 19 [Aegilops tauschii subsp. tauschii]	Aegilops_tauschii	69.8	1.4e-169
TRINITY_DN14172_c3_g1	GAQ86188.1	transcription elongation factor B, polypeptide 1 [Klebsormidium nitens]	Klebsormidium_nitens	37.6	1.7e-16
TRINITY_DN14172_c3_g2	XP_001699095.1	mitogen-activated protein kinase 5, partial [Chlamydomonas reinhardtii]	Chlamydomonas_reinhardtii	54	8e-63
TRINITY_DN14173_c0_g1	XP_003056756.1	predicted protein [Micromonas pusilla CCMP1545]	Micromonas_pusilla	28.8	1.1e-30
TRINITY_DN14173_c1_g1	GAQ84390.1	methionine aminopeptidase 1 [Klebsormidium nitens]	Klebsormidium_nitens	41.6	4.8e-80
TRINITY_DN14173_c3_g1	GBF93864.1	hypothetical protein Rsub_06863 [Raphidocelis subcapitata]	Raphidocelis_subcapitata	32.2	6.2e-07
TRINITY_DN14175_c0_g1	XP_020702156.1	cytochrome P450 CYP72A219-like isoform X1 [Dendrobium catenatum]	Dendrobium_catenatum	33	9e-52
TRINITY_DN14178_c3_g1	EAZ05836.1	hypothetical protein OsI_28072 [Oryza sativa Indica Group]	Oryza_sativa	33.9	3.3e-12
TRINITY_DN14182_c1_g1	EPS60966.1	hypothetical protein M569_13835 [Genlisea aurea]	Genlisea_aurea	44.2	1.6e-43
TRINITY_DN14184_c0_g2	PTQ47336.1	hypothetical protein MARPO_0008s0107 [Marchantia polymorpha]	Marchantia_polymorpha	61.9	0
TRINITY_DN14191_c0_g1	XP_024374381.1	cAMP-dependent protein kinase catalytic subunit beta-like isoform X1 [Physcomitrella patens]	Physcomitrella_patens	53.5	1.3e-84
TRINITY_DN14191_c0_g2	GAX85745.1	hypothetical protein CEUSTIGMA_g13160.t1 [Chlamydomonas eustigma]	Chlamydomonas_eustigma	33.7	1.3e-95
TRINITY_DN14193_c0_g1	XP_024363881.1	40S ribosomal protein S2-like [Physcomitrella patens]	Physcomitrella_patens	73.6	1.8e-94
TRINITY_DN14193_c0_g2	PTQ32494.1	hypothetical protein MARPO_0098s0041 [Marchantia polymorpha]	Marchantia_polymorpha	46.6	2.5e-70
TRINITY_DN14194_c0_g1	CBH32582.1	RNA recognition domain containing protein,expressed [Triticum aestivum]	Triticum_aestivum	31.6	6.8e-37
TRINITY_DN14196_c0_g3	XP_001696901.1	protein tyrosine phosphatase 3, partial [Chlamydomonas reinhardtii]	Chlamydomonas_reinhardtii	38.2	3.8e-28
TRINITY_DN14200_c0_g3	XP_001702841.1	flagellar associated protein [Chlamydomonas reinhardtii]	Chlamydomonas_reinhardtii	48.5	4.7e-95
TRINITY_DN14200_c0_g5	XP_002987315.1	cyclase-associated protein 1 [Selaginella moellendorffii]	Selaginella_moellendorffii	44.6	2.6e-19
TRINITY_DN14201_c1_g3	XP_023872810.1	casein kinase I homolog 1-like [Quercus suber]	Quercus_suber	61.9	6.2e-63
TRINITY_DN14202_c2_g1	XP_001698094.1	predicted protein [Chlamydomonas reinhardtii]	Chlamydomonas_reinhardtii	24	4.5e-11
TRINITY_DN14203_c0_g1	GAQ88890.1	importin alpha isoform [Klebsormidium nitens]	Klebsormidium_nitens	46.6	5.3e-22
TRINITY_DN14204_c2_g1	XP_024391954.1	protein-tyrosine-phosphatase PTP1-like isoform X2 [Physcomitrella patens]	Physcomitrella_patens	53.3	9.8e-11
TRINITY_DN14204_c2_g2	XP_021888419.1	UPF0415 protein C7orf25 homolog [Carica papaya]	Carica_papaya	34	1.1e-18
TRINITY_DN14205_c5_g1	OAE31733.1	hypothetical protein AXG93_3384s2090 [Marchantia polymorpha subsp. ruderalis]	Marchantia_polymorpha	38.5	6.8e-11
TRINITY_DN14206_c3_g1	XP_023912140.1	cytoplasmic dynein 1 intermediate chain 2-like [Quercus suber]	Quercus_suber	31.2	6.2e-74
TRINITY_DN14206_c3_g6	XP_023896369.1	GTP-binding protein 1-like [Quercus suber]	Quercus_suber	49.1	1.4e-136
TRINITY_DN14211_c1_g1	XP_024195084.1	serine/threonine-protein kinase 4 [Rosa chinensis]	Rosa_chinensis	39.5	1.7e-33
TRINITY_DN14211_c2_g1	XP_001696830.1	DnaJ-like protein [Chlamydomonas reinhardtii]	Chlamydomonas_reinhardtii	62.1	6e-13
TRINITY_DN14211_c2_g2	ONK76522.1	uncharacterized protein A4U43_C03F29070 [Asparagus officinalis]	Asparagus_officinalis	65.5	1e-100
TRINITY_DN14212_c0_g1	PRW60262.1	general transcription factor 3C polypeptide 3 isoform X1 [Chlorella sorokiniana]	Chlorella_sorokiniana	40	3.7e-22
TRINITY_DN14213_c3_g4	XP_026429272.1	uncharacterized protein LOC113325288 [Papaver somniferum]	Papaver_somniferum	55.9	4.6e-12
TRINITY_DN14215_c0_g1	OAO89192.1	hypothetical protein AXX17_ATUG03440, partial [Arabidopsis thaliana]	Arabidopsis_thaliana	41.9	1.6e-108
TRINITY_DN14216_c0_g2	GBG88559.1	hypothetical protein CBR_g48028 [Chara braunii]	Chara_braunii	26.8	5.5e-15
TRINITY_DN14219_c1_g5	XP_003062599.1	Multidrug/Oligosaccharidyl-lipid/Polysaccharide flippase superfamily, partial [Micromonas pusilla CCMP1545]	Micromonas_pusilla	35.3	6.4e-14
TRINITY_DN14222_c0_g1	XP_007515337.1	transmembrane protein 144 [Bathycoccus prasinos]	Bathycoccus_prasinos	31.8	9.8e-36
TRINITY_DN14223_c1_g1	XP_002968070.1	probable nucleoredoxin 1 [Selaginella moellendorffii]	Selaginella_moellendorffii	55.4	4e-22
TRINITY_DN14224_c0_g2	XP_023926185.1	probable succinyl-CoA:3-ketoacid coenzyme A transferase, mitochondrial [Quercus suber]	Quercus_suber	57.2	1.1e-76
TRINITY_DN14224_c0_g3	XP_023926185.1	probable succinyl-CoA:3-ketoacid coenzyme A transferase, mitochondrial [Quercus suber]	Quercus_suber	51.2	1.3e-138
TRINITY_DN14224_c0_g5	EEC70905.1	hypothetical protein OsI_02453 [Oryza sativa Indica Group]	Oryza_sativa	55.5	4e-29
TRINITY_DN14226_c0_g3	KZV15123.1	oxidoreductase [Dorcoceras hygrometricum]	Dorcoceras_hygrometricum	39	5.9e-59
TRINITY_DN14226_c0_g5	CDY23307.1	BnaA08g12390D [Brassica napus]	Brassica_napus	44.5	1.3e-22
TRINITY_DN14228_c0_g1	XP_021759525.1	isoflavone 2'-hydroxylase-like [Chenopodium quinoa]	Chenopodium_quinoa	34.7	5.9e-17
TRINITY_DN14228_c0_g4	PIN05054.1	Cytochrome P450 CYP4/CYP19/CYP26 subfamily [Handroanthus impetiginosus]	Handroanthus_impetiginosus	35.2	7.2e-26
TRINITY_DN14230_c0_g2	XP_015617153.1	putative calmodulin-like protein 2 isoform X1 [Oryza sativa Japonica Group]	Oryza_sativa	42.3	5.9e-16
TRINITY_DN14234_c1_g3	PSC72238.1	Trigalactosyldiacylglycerol 1 isoform 3 [Micractinium conductrix]	Micractinium_conductrix	31	2.9e-06
TRINITY_DN14235_c1_g3	XP_020107475.1	small RNA degrading nuclease 5 isoform X2 [Ananas comosus]	Ananas_comosus	37.9	6.5e-42
TRINITY_DN14235_c1_g6	XP_007215965.1	ras-related protein RABB1b [Prunus persica]	Prunus_persica	57	1e-36
TRINITY_DN14236_c0_g1	XP_023871919.1	probable mitochondrial transport protein fsf1 [Quercus suber]	Quercus_suber	33.8	1.2e-39
TRINITY_DN14237_c0_g2	PNW88743.1	hypothetical protein CHLRE_01g042502v5 [Chlamydomonas reinhardtii]	Chlamydomonas_reinhardtii	34.3	8.9e-10
TRINITY_DN14239_c1_g3	RZB65333.1	Cation-chloride cotransporter 1 [Glycine soja]	Glycine_soja	39.3	9.7e-49
TRINITY_DN14239_c1_g6	XP_023875498.1	uncharacterized protein LOC111987982 [Quercus suber]	Quercus_suber	30.6	1.8e-14
TRINITY_DN14239_c1_g7	XP_002986283.1	solute carrier family 12 member 5 [Selaginella moellendorffii]	Selaginella_moellendorffii	29.6	2.4e-29
TRINITY_DN14243_c1_g1	GBG64761.1	hypothetical protein CBR_g46718 [Chara braunii]	Chara_braunii	69.7	4.2e-78
TRINITY_DN14243_c1_g12	GAQ92715.1	uridine kinase/uracil phosphoribosyltransferase [Klebsormidium nitens]	Klebsormidium_nitens	46.3	6.5e-109
TRINITY_DN14243_c1_g2	XP_023893790.1	eukaryotic translation initiation factor 1A-like [Quercus suber]	Quercus_suber	75.7	3e-40
TRINITY_DN14243_c1_g6	XP_005649684.1	26S proteasome subunit P45 [Coccomyxa subellipsoidea C-169]	Coccomyxa_subellipsoidea	78	8.1e-192
TRINITY_DN14245_c2_g2	AIU48809.1	PHP, partial [Brachypodium distachyon]	Brachypodium_distachyon	40.1	1e-24
TRINITY_DN14245_c3_g4	XP_005848749.1	hypothetical protein CHLNCDRAFT_57535 [Chlorella variabilis]	Chlorella_variabilis	61.8	1e-149
TRINITY_DN14246_c0_g2	BAJ93616.1	predicted protein [Hordeum vulgare subsp. vulgare]	Hordeum_vulgare	73	2.8e-179
TRINITY_DN14249_c2_g5	XP_005846326.1	hypothetical protein CHLNCDRAFT_36106 [Chlorella variabilis]	Chlorella_variabilis	64.3	6.4e-07
TRINITY_DN14249_c2_g9	XP_010242492.1	PREDICTED: DNA-directed RNA polymerase II subunit RPB7 isoform X1 [Nelumbo nucifera]	Nelumbo_nucifera	54.2	2.5e-37
TRINITY_DN14251_c0_g1	GAQ86765.1	hypothetical protein KFL_003100020 [Klebsormidium nitens]	Klebsormidium_nitens	33.4	1.4e-69
TRINITY_DN14251_c0_g2	XP_002965672.1	box C/D snoRNA protein 1 [Selaginella moellendorffii]	Selaginella_moellendorffii	37	6.4e-39
TRINITY_DN14251_c0_g4	XP_005643255.1	sterol reductase [Coccomyxa subellipsoidea C-169]	Coccomyxa_subellipsoidea	51	4.8e-119
TRINITY_DN14253_c1_g1	GAQ85144.1	hypothetical protein KFL_002210090 [Klebsormidium nitens]	Klebsormidium_nitens	34	1.7e-28
TRINITY_DN14254_c2_g1	GBG87812.1	hypothetical protein CBR_g45968 [Chara braunii]	Chara_braunii	59.2	1.8e-09
TRINITY_DN14254_c2_g4	PON99616.1	Ribosomal protein [Trema orientale]	Trema_orientale	39.2	1.7e-09
TRINITY_DN14255_c0_g3	GAQ88451.1	reverse transcriptase [Klebsormidium nitens]	Klebsormidium_nitens	47.9	1.7e-27
TRINITY_DN14260_c0_g1	XP_026441996.1	uncharacterized protein K02A2.6-like, partial [Papaver somniferum]	Papaver_somniferum	42.1	8.1e-18
TRINITY_DN14264_c1_g1	GAV73752.1	Pro_isomerase domain-containing protein [Cephalotus follicularis]	Cephalotus_follicularis	36.6	2.7e-22
TRINITY_DN14265_c0_g2	XP_023893846.1	tRNA (uracil-O(2)-)-methyltransferase-like [Quercus suber]	Quercus_suber	30.1	1.1e-28
TRINITY_DN14265_c0_g3	XP_017615417.1	PREDICTED: 60S acidic ribosomal protein P0-like [Gossypium arboreum]	Gossypium_arboreum	53.7	9.3e-48
TRINITY_DN14268_c1_g13	XP_012853266.1	PREDICTED: T-box transcription factor TBX6-like [Erythranthe guttata]	Erythranthe_guttata	52.5	4.7e-55
TRINITY_DN14268_c1_g4	XP_003056130.1	predicted protein [Micromonas pusilla CCMP1545]	Micromonas_pusilla	37.7	9.1e-47
TRINITY_DN14271_c3_g1	XP_026417682.1	eukaryotic translation initiation factor NCBP-like [Papaver somniferum]	Papaver_somniferum	59.5	1.4e-49
TRINITY_DN14273_c2_g1	XP_016678958.1	PREDICTED: probable ribosome biogenesis protein RLP24 [Gossypium hirsutum]	Gossypium_hirsutum	59.7	3.1e-43
TRINITY_DN14274_c1_g1	XP_003082628.2	Zinc finger, ZZ-type [Ostreococcus tauri]	Ostreococcus_tauri	35.7	1.8e-40
TRINITY_DN14274_c1_g2	RZB99279.1	ADP-ribosylation factor 2 isoform A [Glycine soja]	Glycine_soja	83.5	1e-51
TRINITY_DN14274_c1_g3	OAE19308.1	hypothetical protein AXG93_1860s1170 [Marchantia polymorpha subsp. ruderalis]	Marchantia_polymorpha	53.8	7.1e-38
TRINITY_DN14274_c1_g5	XP_012845055.1	PREDICTED: LOW QUALITY PROTEIN: alpha-mannosidase [Erythranthe guttata]	Erythranthe_guttata	33.8	6.9e-79
TRINITY_DN14274_c1_g7	PWA94848.1	small GTPase superfamily, Rab type [Artemisia annua]	Artemisia_annua	60	2.2e-16
TRINITY_DN14275_c0_g2	XP_006847574.3	splicing factor, suppressor of white-apricot homolog isoform X1 [Amborella trichopoda]	Amborella_trichopoda	33.9	3.3e-11
TRINITY_DN14275_c0_g4	XP_012067070.1	zinc finger CCCH domain-containing protein 48 [Jatropha curcas]	Jatropha_curcas	28.3	2.3e-09
TRINITY_DN14277_c0_g1	OAE22448.1	hypothetical protein AXG93_3348s1060 [Marchantia polymorpha subsp. ruderalis]	Marchantia_polymorpha	28.2	2.6e-29
TRINITY_DN14277_c4_g1	XP_023883135.1	protein kinase C-like [Quercus suber]	Quercus_suber	48.8	3.7e-80
TRINITY_DN14278_c3_g10	XP_002951390.1	hypothetical protein VOLCADRAFT_81425 [Volvox carteri f. nagariensis]	Volvox_carteri	35.3	1.6e-38
TRINITY_DN14278_c3_g2	XP_024965277.1	ubiquitin-conjugating enzyme E2-17 kDa [Cynara cardunculus var. scolymus]	Cynara_cardunculus	72.3	2.3e-50
TRINITY_DN14278_c3_g9	XP_009407924.1	PREDICTED: THO complex subunit 3 [Musa acuminata subsp. malaccensis]	Musa_acuminata	53.8	2.6e-92
TRINITY_DN14280_c0_g1	ACF79437.1	unknown [Zea mays]	Zea_mays	52.7	1.6e-79
TRINITY_DN14280_c0_g5	GAQ87395.1	Serine Threonine protein kinase [Klebsormidium nitens]	Klebsormidium_nitens	42.8	2.9e-27
TRINITY_DN14280_c0_g6	ABO37801.1	ubiquitin activating enzyme-like protein, partial [Pisum sativum]	Pisum_sativum	49.3	1.8e-69
TRINITY_DN14281_c0_g3	GAX79090.1	hypothetical protein CEUSTIGMA_g6530.t1 [Chlamydomonas eustigma]	Chlamydomonas_eustigma	38.7	3.9e-29
TRINITY_DN14281_c0_g4	ERN00756.1	hypothetical protein AMTR_s00106p00133350 [Amborella trichopoda]	Amborella_trichopoda	27	9e-53
TRINITY_DN14281_c0_g5	XP_020519677.1	CCR4-NOT transcription complex subunit 1 isoform X3 [Amborella trichopoda]	Amborella_trichopoda	34.8	5.3e-270
TRINITY_DN14281_c1_g4	XP_023914364.1	uncharacterized mitochondrial carrier C8C9.12c-like [Quercus suber]	Quercus_suber	44.3	2e-62
TRINITY_DN14283_c3_g1	XP_006607042.1	insulin gene enhancer protein isl-1-like, partial [Glycine max]	Glycine_max	42.9	2e-46
TRINITY_DN14283_c4_g1	PIN03233.1	Ribosomal protein S6 kinase [Handroanthus impetiginosus]	Handroanthus_impetiginosus	45.5	1.4e-21
TRINITY_DN14283_c4_g2	GAX77566.1	hypothetical protein CEUSTIGMA_g5010.t1 [Chlamydomonas eustigma]	Chlamydomonas_eustigma	30.6	6.7e-42
TRINITY_DN14285_c0_g1	PIM99147.1	Tyrosine kinase [Handroanthus impetiginosus]	Handroanthus_impetiginosus	38.5	6.5e-28
TRINITY_DN14286_c0_g2	XP_009336859.1	PREDICTED: NADPH:adrenodoxin oxidoreductase, mitochondrial-like [Pyrus x bretschneideri]	Pyrus_x_bretschneideri	46.9	1.3e-95
TRINITY_DN14293_c0_g1	XP_003064762.1	predicted protein [Micromonas pusilla CCMP1545]	Micromonas_pusilla	40.1	6.6e-20
TRINITY_DN14294_c0_g1	XP_021765802.1	putative glycerol-3-phosphate transporter 4 [Chenopodium quinoa]	Chenopodium_quinoa	38.9	3.2e-87
TRINITY_DN14295_c0_g4	KMZ60305.1	Kinesin-related protein-like [Zostera marina]	Zostera_marina	48.8	3.3e-26
TRINITY_DN14295_c0_g6	XP_024369373.1	kinesin-like protein KIN-5A isoform X1 [Physcomitrella patens]	Physcomitrella_patens	32.5	1.5e-101
TRINITY_DN14296_c0_g1	PNW81851.1	hypothetical protein CHLRE_06g263150v5 [Chlamydomonas reinhardtii]	Chlamydomonas_reinhardtii	33.4	2.7e-44
TRINITY_DN14299_c2_g1	XP_020244329.1	DNA mismatch repair protein MSH2 [Asparagus officinalis]	Asparagus_officinalis	38	5.5e-120
TRINITY_DN14300_c1_g1	GBG76482.1	hypothetical protein CBR_g22230 [Chara braunii]	Chara_braunii	36.9	1.3e-32
TRINITY_DN14301_c1_g1	XP_027097873.1	lipoyl synthase, chloroplastic [Coffea arabica]	Coffea_arabica	66	1.2e-117
TRINITY_DN14302_c2_g2	XP_001699953.1	predicted protein [Chlamydomonas reinhardtii]	Chlamydomonas_reinhardtii	58.7	6.3e-27
TRINITY_DN14302_c2_g3	XP_002500132.1	anion exchanger family [Micromonas commoda]	Micromonas_commoda	40.1	3.5e-27
TRINITY_DN14306_c0_g1	GAQ86831.1	Phosphoglycerate mutase-like family protein [Klebsormidium nitens]	Klebsormidium_nitens	59.4	2.1e-11
TRINITY_DN14306_c0_g2	KYP40441.1	Inositol hexakisphosphate and diphosphoinositol-pentakisphosphate kinase [Cajanus cajan]	Cajanus_cajan	31.5	2.9e-46
TRINITY_DN14306_c0_g5	EFJ07403.1	hypothetical protein SELMODRAFT_429797 [Selaginella moellendorffii]	Selaginella_moellendorffii	33.6	3.2e-46
TRINITY_DN14310_c1_g2	EFJ09743.1	hypothetical protein SELMODRAFT_129306 [Selaginella moellendorffii]	Selaginella_moellendorffii	37.1	1.4e-33
TRINITY_DN14310_c2_g1	EFJ32417.1	hypothetical protein SELMODRAFT_230903 [Selaginella moellendorffii]	Selaginella_moellendorffii	25.4	1.5e-12
TRINITY_DN14312_c5_g1	GAQ81470.1	hypothetical protein KFL_000810110 [Klebsormidium nitens]	Klebsormidium_nitens	39.7	7.7e-12
TRINITY_DN14319_c2_g1	XP_027110779.1	sodium-dependent phosphate transport protein 1, chloroplastic isoform X1 [Coffea arabica]	Coffea_arabica	38.7	1.5e-61
TRINITY_DN14320_c0_g5	XP_022756336.1	protein RTF2 homolog [Durio zibethinus]	Durio_zibethinus	40.5	1.7e-27
TRINITY_DN14321_c0_g3	XP_023893799.1	putative metallocarboxypeptidase ECM14 [Quercus suber]	Quercus_suber	33.2	2.4e-41
TRINITY_DN14322_c0_g1	XP_006842996.3	xanthine dehydrogenase/oxidase [Amborella trichopoda]	Amborella_trichopoda	42.5	2.8e-74
TRINITY_DN14322_c0_g2	XP_023926293.1	tyrosine--tRNA ligase, cytoplasmic-like [Quercus suber]	Quercus_suber	50.9	1.1e-88
TRINITY_DN14322_c0_g3	XP_005642655.1	hypothetical protein COCSUDRAFT_49414 [Coccomyxa subellipsoidea C-169]	Coccomyxa_subellipsoidea	36.7	1.4e-54
TRINITY_DN14325_c2_g1	KYP48340.1	Pre-mRNA-splicing factor 38B [Cajanus cajan]	Cajanus_cajan	31.5	2.6e-17
TRINITY_DN14325_c2_g2	KMZ68274.1	60S ribosomal protein L35 [Zostera marina]	Zostera_marina	67.2	6.7e-34
TRINITY_DN14326_c0_g1	OAE19547.1	hypothetical protein AXG93_960s1010 [Marchantia polymorpha subsp. ruderalis]	Marchantia_polymorpha	64.4	2e-28
TRINITY_DN14328_c6_g1	BAJ87488.1	predicted protein, partial [Hordeum vulgare subsp. vulgare]	Hordeum_vulgare	39.7	1.4e-108
TRINITY_DN14328_c8_g1	GAX79090.1	hypothetical protein CEUSTIGMA_g6530.t1 [Chlamydomonas eustigma]	Chlamydomonas_eustigma	32	3.4e-35
TRINITY_DN14330_c1_g3	GAQ80758.1	Vacuolar H+-ATPase V1 sector subunit D [Klebsormidium nitens]	Klebsormidium_nitens	59.6	5.2e-59
TRINITY_DN14331_c3_g1	GBG79448.1	hypothetical protein CBR_g29596 [Chara braunii]	Chara_braunii	31.1	1.3e-06
TRINITY_DN14331_c3_g2	BAJ95121.1	predicted protein [Hordeum vulgare subsp. vulgare]	Hordeum_vulgare	47.2	1.6e-75
TRINITY_DN14332_c1_g6	PTQ47725.1	hypothetical protein MARPO_0007s0130 [Marchantia polymorpha]	Marchantia_polymorpha	23.7	4.3e-38
TRINITY_DN14332_c1_g8	XP_003059554.1	predicted protein [Micromonas pusilla CCMP1545]	Micromonas_pusilla	39.6	1.7e-30
TRINITY_DN14333_c2_g4	XP_002501083.1	predicted protein [Micromonas commoda]	Micromonas_commoda	39	4.3e-133
TRINITY_DN14333_c2_g6	GAQ80261.1	hypothetical protein KFL_000500130 [Klebsormidium nitens]	Klebsormidium_nitens	41.9	4.6e-37
TRINITY_DN14334_c0_g1	OAE20529.1	hypothetical protein AXG93_948s1370 [Marchantia polymorpha subsp. ruderalis]	Marchantia_polymorpha	32.6	3e-27
TRINITY_DN14334_c1_g1	XP_005845367.1	hypothetical protein CHLNCDRAFT_8322, partial [Chlorella variabilis]	Chlorella_variabilis	42.9	5.1e-49
TRINITY_DN14335_c0_g3	XP_023905322.1	probable rhamnogalacturonate lyase C [Quercus suber]	Quercus_suber	30.7	3.3e-21
TRINITY_DN14340_c1_g1	PTQ45629.1	hypothetical protein MARPO_0014s0146 [Marchantia polymorpha]	Marchantia_polymorpha	39.5	1.7e-23
TRINITY_DN14340_c1_g2	XP_002974529.1	ubiquitin carboxyl-terminal hydrolase 3 isoform X2 [Selaginella moellendorffii]	Selaginella_moellendorffii	54.7	3.1e-73
TRINITY_DN14340_c1_g3	GAQ81518.1	hypothetical protein KFL_000820260 [Klebsormidium nitens]	Klebsormidium_nitens	36.4	4.3e-10
TRINITY_DN14341_c0_g2	GAQ84320.1	UDP-galactose transporter related protein [Klebsormidium nitens]	Klebsormidium_nitens	38.3	3.3e-48
TRINITY_DN14344_c0_g1	PNW88815.1	hypothetical protein CHLRE_01g045601v5 [Chlamydomonas reinhardtii]	Chlamydomonas_reinhardtii	29.4	1.6e-43
TRINITY_DN14344_c1_g4	GBG59018.1	hypothetical protein CBR_g24366 [Chara braunii]	Chara_braunii	52.9	1.1e-86
TRINITY_DN14346_c0_g1	PSC69106.1	Qa-SYP4 Tlg2p Syntaxin 16-type [Micractinium conductrix]	Micractinium_conductrix	33.7	3.7e-32
TRINITY_DN14348_c0_g11	XP_005642683.1	hypothetical protein COCSUDRAFT_49367 [Coccomyxa subellipsoidea C-169]	Coccomyxa_subellipsoidea	34	5.4e-17
TRINITY_DN14349_c1_g1	GAQ87564.1	bud site selection protein 31 [Klebsormidium nitens]	Klebsormidium_nitens	80.4	7.5e-16
TRINITY_DN14349_c2_g7	GBG73776.1	hypothetical protein CBR_g17115 [Chara braunii]	Chara_braunii	42.1	1.6e-49
TRINITY_DN14350_c2_g1	XP_011626900.1	E3 ubiquitin-protein ligase RNF14 [Amborella trichopoda]	Amborella_trichopoda	30.9	2.2e-42
TRINITY_DN14351_c1_g10	XP_007513597.1	predicted protein [Bathycoccus prasinos]	Bathycoccus_prasinos	25	1.6e-06
TRINITY_DN14351_c1_g3	OUZ99170.1	Mitochondrial carrier protein [Macleaya cordata]	Macleaya_cordata	41.4	3e-10
TRINITY_DN14351_c1_g5	XP_024383968.1	mitochondrial uncoupling protein 3-like [Physcomitrella patens]	Physcomitrella_patens	47.7	5.2e-75
TRINITY_DN14352_c0_g1	PKI33442.1	hypothetical protein CRG98_046173 [Punica granatum]	Punica_granatum	37.5	2.7e-21
TRINITY_DN14353_c1_g1	GAQ83213.1	Aminotransferase class V [Klebsormidium nitens]	Klebsormidium_nitens	51.1	1.2e-112
TRINITY_DN14354_c0_g3	XP_014492859.1	SCAN domain-containing protein 3-like, partial [Vigna radiata var. radiata]	Vigna_radiata	41.3	5.3e-18
TRINITY_DN14355_c1_g1	RZB71876.1	Mitogen-activated protein kinase kinase 2 isoform E [Glycine soja]	Glycine_soja	40.3	2.1e-45
TRINITY_DN14357_c0_g1	XP_023919800.1	5-demethoxyubiquinone hydroxylase, mitochondrial-like [Quercus suber]	Quercus_suber	37.6	1.8e-29
TRINITY_DN14357_c2_g1	XP_005848463.1	hypothetical protein CHLNCDRAFT_35098 [Chlorella variabilis]	Chlorella_variabilis	59.2	5.3e-28
TRINITY_DN14358_c1_g3	OAE19212.1	hypothetical protein AXG93_4751s1170 [Marchantia polymorpha subsp. ruderalis]	Marchantia_polymorpha	26.4	3.6e-39
TRINITY_DN14358_c1_g7	XP_002975550.1	vam6/Vps39-like protein [Selaginella moellendorffii]	Selaginella_moellendorffii	28.1	6.5e-29
TRINITY_DN14361_c3_g2	XP_016714565.1	PREDICTED: RNA-binding protein 39-like [Gossypium hirsutum]	Gossypium_hirsutum	41.3	1.5e-68
TRINITY_DN14362_c0_g1	XP_005645462.1	HAD-like protein [Coccomyxa subellipsoidea C-169]	Coccomyxa_subellipsoidea	39.3	8.1e-35
TRINITY_DN14363_c0_g3	ALF36426.1	SH3 and PX domain-containing protein 2A [Alchemilla fissa]	Alchemilla_fissa	41.1	8.9e-13
TRINITY_DN14364_c0_g2	XP_022839532.1	RNA polymerase II, Rpb4, core [Ostreococcus tauri]	Ostreococcus_tauri	43.5	5.6e-11
TRINITY_DN14364_c0_g5	GBG68516.1	hypothetical protein CBR_g3060 [Chara braunii]	Chara_braunii	48.8	1.6e-85
TRINITY_DN14364_c0_g7	XP_027345677.1	ESF1 homolog [Abrus precatorius]	Abrus_precatorius	40.7	1.1e-53
TRINITY_DN14364_c0_g9	XP_023877220.1	pre-rRNA-processing protein esf1 [Quercus suber]	Quercus_suber	30.5	1.4e-07
TRINITY_DN14364_c1_g1	BAK03068.1	predicted protein [Hordeum vulgare subsp. vulgare]	Hordeum_vulgare	50.3	2.6e-39
TRINITY_DN14365_c4_g2	XP_024401123.1	von Willebrand factor A domain-containing protein DDB_G0292016-like [Physcomitrella patens]	Physcomitrella_patens	36.8	1.3e-27
TRINITY_DN14367_c1_g2	RCV37364.1	hypothetical protein SETIT_8G056800v2, partial [Setaria italica]	Setaria_italica	30.7	2.9e-15
TRINITY_DN14369_c0_g1	XP_016719102.1	PREDICTED: metal transporter Nramp3-like [Gossypium hirsutum]	Gossypium_hirsutum	50.5	3.7e-119
TRINITY_DN14373_c1_g2	GBG60562.1	hypothetical protein CBR_g8584 [Chara braunii]	Chara_braunii	58.9	1.7e-61
TRINITY_DN14375_c0_g1	XP_016734096.1	PREDICTED: uncharacterized protein K02A2.6-like, partial [Gossypium hirsutum]	Gossypium_hirsutum	44.2	3.4e-14
TRINITY_DN14376_c3_g4	BAJ98742.1	predicted protein [Hordeum vulgare subsp. vulgare]	Hordeum_vulgare	29.5	4e-08
TRINITY_DN14379_c2_g1	ONM32942.1	Pyridoxal kinase [Zea mays]	Zea_mays	44.1	1.8e-31
TRINITY_DN14382_c0_g2	BAK00177.1	predicted protein [Hordeum vulgare subsp. vulgare]	Hordeum_vulgare	27.8	5.1e-22
TRINITY_DN14383_c1_g2	XP_023768384.1	zinc finger MYM-type protein 1-like, partial [Lactuca sativa]	Lactuca_sativa	29.1	7.3e-08
TRINITY_DN14385_c1_g2	PSC75468.1	very-long-chain (3R)-3-hydroxyacyl-dehydratase 2 [Micractinium conductrix]	Micractinium_conductrix	39	2e-26
TRINITY_DN14385_c2_g3	PNX91844.1	GTP-binding protein YPTM2-like, partial [Trifolium pratense]	Trifolium_pratense	30.7	1e-08
TRINITY_DN14385_c2_g4	XP_011038852.1	PREDICTED: protein CWC15 homolog isoform X1 [Populus euphratica]	Populus_euphratica	48.7	2.1e-22
TRINITY_DN14385_c2_g5	XP_006304189.1	ras-related protein RABA1a [Capsella rubella]	Capsella_rubella	43.8	4.8e-15
TRINITY_DN14387_c0_g1	RYR78785.1	hypothetical protein Ahy_A01g003641 isoform D [Arachis hypogaea]	Arachis_hypogaea	57.3	3.9e-22
TRINITY_DN14388_c2_g4	GAQ91546.1	Zn2+ transporter [Klebsormidium nitens]	Klebsormidium_nitens	41.9	6.6e-28
TRINITY_DN14392_c0_g2	XP_010440002.1	PREDICTED: palmitoyl-protein thioesterase 1-like isoform X1 [Camelina sativa]	Camelina_sativa	28.4	1.9e-15
TRINITY_DN14394_c0_g4	XP_023871820.1	molybdenum cofactor biosynthesis protein 1-like [Quercus suber]	Quercus_suber	40	6.8e-102
TRINITY_DN14394_c0_g7	XP_023894576.1	GTP 3',8-cyclase, mitochondrial [Quercus suber]	Quercus_suber	68.1	4.7e-17
TRINITY_DN14396_c0_g2	XP_005643881.1	putative aspartic protease [Coccomyxa subellipsoidea C-169]	Coccomyxa_subellipsoidea	43.2	7.3e-93
TRINITY_DN14396_c0_g3	XP_026409636.1	zinc finger A20 and AN1 domain-containing stress-associated protein 1-like [Papaver somniferum]	Papaver_somniferum	43.9	1e-07
TRINITY_DN14397_c0_g1	OVA13128.1	Tetratricopeptide repeat-containing domain [Macleaya cordata]	Macleaya_cordata	47.9	5.2e-16
TRINITY_DN14397_c0_g2	KCW78647.1	hypothetical protein EUGRSUZ_C00110 [Eucalyptus grandis]	Eucalyptus_grandis	52.4	1.1e-17
TRINITY_DN14397_c2_g2	PSS14247.1	Actin like [Actinidia chinensis var. chinensis]	Actinidia_chinensis	41.1	1.3e-78
TRINITY_DN14397_c2_g3	XP_020687820.1	FHA domain-containing protein FHA2-like [Dendrobium catenatum]	Dendrobium_catenatum	33.1	6.5e-08
TRINITY_DN14397_c2_g4	XP_009403594.1	PREDICTED: sphingosine-1-phosphate lyase [Musa acuminata subsp. malaccensis]	Musa_acuminata	46.6	1.3e-98
TRINITY_DN14397_c2_g9	XP_018845505.1	PREDICTED: nucleosome assembly protein 1;2-like [Juglans regia]	Juglans_regia	34.9	3.1e-35
TRINITY_DN14398_c1_g1	XP_002439257.1	phosphoglycerate mutase-like protein AT74H [Sorghum bicolor]	Sorghum_bicolor	43.6	6.8e-38
TRINITY_DN14400_c1_g6	XP_023907153.1	uncharacterized protein LOC112018856 [Quercus suber]	Quercus_suber	47.8	2.6e-06
TRINITY_DN14402_c0_g2	XP_020689295.1	DNA-directed primase/polymerase protein isoform X2 [Dendrobium catenatum]	Dendrobium_catenatum	37.4	5.4e-31
TRINITY_DN14402_c1_g2	XP_016564942.1	PREDICTED: structural maintenance of chromosomes protein 2-1-like [Capsicum annuum]	Capsicum_annuum	51.9	2.3e-102
TRINITY_DN14402_c2_g2	XP_018859806.1	PREDICTED: structural maintenance of chromosomes protein 2-1-like [Juglans regia]	Juglans_regia	54.2	6.7e-132
TRINITY_DN14405_c2_g4	XP_027347184.1	serine carboxypeptidase-like 50 [Abrus precatorius]	Abrus_precatorius	36	5.1e-62
TRINITY_DN14407_c0_g1	XP_002503911.1	alanine-glyoxylate aminotransferase [Micromonas commoda]	Micromonas_commoda	46.8	8.5e-98
TRINITY_DN14407_c0_g2	GAQ83678.1	serine/threonine protein kinase [Klebsormidium nitens]	Klebsormidium_nitens	37.3	1.7e-45
TRINITY_DN14408_c0_g1	XP_015614222.1	vacuolar protein sorting-associated protein 2 homolog 3 [Oryza sativa Japonica Group]	Oryza_sativa	37.5	1.8e-14
TRINITY_DN14408_c0_g4	XP_021654739.1	ubiquinone biosynthesis O-methyltransferase, mitochondrial-like isoform X1 [Hevea brasiliensis]	Hevea_brasiliensis	46.7	4e-43
TRINITY_DN14410_c0_g3	XP_023882947.1	queuosine salvage protein-like [Quercus suber]	Quercus_suber	40.9	6.3e-46
TRINITY_DN14411_c1_g1	XP_024374206.1	26S proteasome non-ATPase regulatory subunit 14 homolog [Physcomitrella patens]	Physcomitrella_patens	78.3	1.3e-123
TRINITY_DN14412_c1_g1	BAJ99830.1	predicted protein [Hordeum vulgare subsp. vulgare]	Hordeum_vulgare	39.3	1.6e-88
TRINITY_DN14412_c1_g3	XP_023919750.1	alpha-amylase-like [Quercus suber]	Quercus_suber	35.2	1.8e-81
TRINITY_DN14412_c1_g4	PTQ35727.1	hypothetical protein MARPO_0069s0064 [Marchantia polymorpha]	Marchantia_polymorpha	36.2	2e-15
TRINITY_DN14413_c0_g2	XP_010548514.1	PREDICTED: serine/threonine-protein kinase HT1-like [Tarenaya hassleriana]	Tarenaya_hassleriana	35	2.8e-19
TRINITY_DN14419_c1_g1	GAX72856.1	hypothetical protein CEUSTIGMA_g311.t1 [Chlamydomonas eustigma]	Chlamydomonas_eustigma	25.7	4e-14
TRINITY_DN14419_c1_g4	GAQ89681.1	hypothetical protein KFL_005500040 [Klebsormidium nitens]	Klebsormidium_nitens	38.7	6.1e-18
TRINITY_DN14419_c1_g6	PTQ37557.1	hypothetical protein MARPO_0056s0033 [Marchantia polymorpha]	Marchantia_polymorpha	40.7	5e-13
TRINITY_DN14419_c2_g1	XP_002508197.1	predicted protein [Micromonas commoda]	Micromonas_commoda	31.1	3.2e-31
TRINITY_DN14420_c1_g7	ABR16257.1	unknown [Picea sitchensis]	Picea_sitchensis	47.4	1.1e-107
TRINITY_DN14427_c0_g2	XP_005648554.1	aspartyl-tRNA synthetase [Coccomyxa subellipsoidea C-169]	Coccomyxa_subellipsoidea	54.6	1.1e-150
TRINITY_DN14427_c0_g4	GBG68865.1	Chloride channel protein CLC [Chara braunii]	Chara_braunii	32.3	2.3e-54
TRINITY_DN14427_c0_g5	XP_020258098.1	chloride channel protein CLC-d isoform X3 [Asparagus officinalis]	Asparagus_officinalis	27.3	9.9e-46
TRINITY_DN14429_c2_g1	AES87597.2	molybdenum cofactor sulfurase [Medicago truncatula]	Medicago_truncatula	44.2	2.9e-83
TRINITY_DN14429_c2_g6	XP_026447416.1	ras-related protein RIC1 [Papaver somniferum]	Papaver_somniferum	44.4	6.3e-21
TRINITY_DN14430_c2_g6	XP_002268063.1	PREDICTED: DNA polymerase epsilon subunit C [Vitis vinifera]	Vitis_vinifera	52.2	1.3e-19
TRINITY_DN14431_c1_g2	OMO61637.1	Phox/Bem1p [Corchorus capsularis]	Corchorus_capsularis	27	9.5e-26
TRINITY_DN14432_c0_g1	XP_022838265.1	Phospholipase D/Transphosphatidylase [Ostreococcus tauri]	Ostreococcus_tauri	33.7	8e-43
TRINITY_DN14433_c2_g12	XP_016573050.1	PREDICTED: LOW QUALITY PROTEIN: probable splicing factor 3A subunit 1 [Capsicum annuum]	Capsicum_annuum	36.5	3.3e-89
TRINITY_DN14435_c0_g1	XP_009366572.1	PREDICTED: uncharacterized protein LOC103956333 [Pyrus x bretschneideri]	Pyrus_x_bretschneideri	83.3	7.6e-08
TRINITY_DN14435_c1_g11	KEH17031.1	hypothetical protein MTR_0052s0170 [Medicago truncatula]	Medicago_truncatula	77.3	7.1e-10
TRINITY_DN14435_c1_g14	XP_005842766.1	hypothetical protein CHLNCDRAFT_28889 [Chlorella variabilis]	Chlorella_variabilis	97.6	1.8e-14
TRINITY_DN14435_c1_g3	RDY08055.1	hypothetical protein CR513_07769, partial [Mucuna pruriens]	Mucuna_pruriens	47.9	8.8e-20
TRINITY_DN14435_c1_g4	PHT56948.1	hypothetical protein CQW23_05434 [Capsicum baccatum]	Capsicum_baccatum	63.6	2.9e-09
TRINITY_DN14435_c1_g7	RYR03479.1	hypothetical protein Ahy_B06g082467 [Arachis hypogaea]	Arachis_hypogaea	100	5.9e-32
TRINITY_DN14435_c1_g8	KMS94684.1	hypothetical protein BVRB_016310 [Beta vulgaris subsp. vulgaris]	Beta_vulgaris	77.2	5.2e-14
TRINITY_DN14437_c0_g1	XP_022765460.1	protein FLOWERING LOCUS D [Durio zibethinus]	Durio_zibethinus	48.7	3.3e-06
TRINITY_DN14442_c0_g1	XP_004492131.1	kinesin-like protein KIN-8A isoform X1 [Cicer arietinum]	Cicer_arietinum	25.9	4.7e-10
TRINITY_DN14444_c3_g4	XP_023905494.1	kynurenine 3-monooxygenase-like [Quercus suber]	Quercus_suber	38.8	2.8e-73
TRINITY_DN14446_c1_g10	ESQ51856.1	hypothetical protein EUTSA_v10017564mg, partial [Eutrema salsugineum]	Eutrema_salsugineum	30.7	2.4e-20
TRINITY_DN14446_c1_g5	XP_014490505.1	tigger transposable element-derived protein 6-like, partial [Vigna radiata var. radiata]	Vigna_radiata	32.5	1.5e-34
TRINITY_DN14446_c1_g6	PNX98112.1	putative E3 ubiquitin-protein ligase RNF144A-like protein [Trifolium pratense]	Trifolium_pratense	30.8	1.1e-21
TRINITY_DN14449_c0_g10	BAJ91604.1	predicted protein [Hordeum vulgare subsp. vulgare]	Hordeum_vulgare	86.3	5e-146
TRINITY_DN14449_c0_g6	RQM02058.1	hypothetical protein DY000_00028536 [Brassica cretica]	Brassica_cretica	46.5	7.6e-41
TRINITY_DN14450_c0_g1	XP_003059436.1	predicted protein [Micromonas pusilla CCMP1545]	Micromonas_pusilla	33.9	2.6e-27
TRINITY_DN14451_c1_g2	XP_005645983.1	hypothetical protein COCSUDRAFT_53991 [Coccomyxa subellipsoidea C-169]	Coccomyxa_subellipsoidea	42.6	1e-72
TRINITY_DN14451_c1_g7	XP_024382692.1	transmembrane 9 superfamily member 1-like isoform X1 [Physcomitrella patens]	Physcomitrella_patens	65.5	2.8e-83
TRINITY_DN14453_c0_g1	XP_004146573.1	PREDICTED: respiratory burst oxidase homolog protein A-like [Cucumis sativus]	Cucumis_sativus	27.9	2.8e-71
TRINITY_DN14455_c0_g1	XP_020676698.1	dolichol kinase EVAN [Dendrobium catenatum]	Dendrobium_catenatum	30.3	9.5e-31
TRINITY_DN14455_c0_g2	KHG21565.1	Cytochrome b5 [Gossypium arboreum]	Gossypium_arboreum	56.7	2.1e-20
TRINITY_DN14455_c0_g5	GAQ78813.1	Dynein-associated protein Roadblock [Klebsormidium nitens]	Klebsormidium_nitens	64.2	2.9e-28
TRINITY_DN14456_c1_g1	AUZ95871.1	FK506-binding protein [Malus domestica]	Malus_domestica	44.9	1.3e-24
TRINITY_DN14460_c0_g3	XP_026431021.1	zinc finger CCCH domain-containing protein 5-like [Papaver somniferum]	Papaver_somniferum	44.2	2.5e-47
TRINITY_DN14461_c0_g8	XP_002500185.1	hypothetical protein MICPUN_113602 [Micromonas commoda]	Micromonas_commoda	59.2	4.2e-115
TRINITY_DN14464_c0_g1	XP_019189074.1	PREDICTED: splicing factor SF3a60 homolog [Ipomoea nil]	Ipomoea_nil	36.9	4.7e-57
TRINITY_DN14464_c1_g7	XP_024372431.1	eukaryotic translation initiation factor 5B-like [Physcomitrella patens]	Physcomitrella_patens	54.9	6.4e-185
TRINITY_DN14465_c0_g1	OAE34882.1	hypothetical protein AXG93_1587s1130 [Marchantia polymorpha subsp. ruderalis]	Marchantia_polymorpha	33.5	3.7e-40
TRINITY_DN14465_c0_g6	XP_023874598.1	sphingosine-1-phosphate lyase-like [Quercus suber]	Quercus_suber	42.1	4e-117
TRINITY_DN14467_c3_g2	XP_015631661.1	DNA-directed RNA polymerase II subunit RPB2 [Oryza sativa Japonica Group]	Oryza_sativa	67.2	0
TRINITY_DN14468_c0_g1	XP_020591177.1	acidic leucine-rich nuclear phosphoprotein 32-related protein isoform X1 [Phalaenopsis equestris]	Phalaenopsis_equestris	47	2.1e-23
TRINITY_DN14469_c4_g1	XP_021731607.1	2-oxoglutarate dehydrogenase, mitochondrial-like [Chenopodium quinoa]	Chenopodium_quinoa	53.6	1.4e-143
TRINITY_DN14469_c4_g2	XP_008808088.1	AP2-associated protein kinase 1-like [Phoenix dactylifera]	Phoenix_dactylifera	40.3	1.3e-50
TRINITY_DN1446_c0_g1	XP_017238369.1	PREDICTED: 54S ribosomal protein L51, mitochondrial-like [Daucus carota subsp. sativus]	Daucus_carota	34.3	1.1e-12
TRINITY_DN14470_c2_g1	OAE25234.1	hypothetical protein AXG93_2210s1180 [Marchantia polymorpha subsp. ruderalis]	Marchantia_polymorpha	44.4	2.8e-54
TRINITY_DN14471_c1_g2	XP_024357083.1	gamma-tubulin complex component 3-like [Physcomitrella patens]	Physcomitrella_patens	37.4	7.5e-132
TRINITY_DN14472_c0_g1	XP_023911645.1	rho-type GTPase-activating protein 1-like [Quercus suber]	Quercus_suber	23.3	1.2e-09
TRINITY_DN14481_c1_g1	XP_023889181.1	probable cation-transporting ATPase C1672.11c [Quercus suber]	Quercus_suber	42.6	2.7e-46
TRINITY_DN14481_c1_g2	XP_023880051.1	probable cation-transporting ATPase C1672.11c [Quercus suber]	Quercus_suber	45.5	7.9e-54
TRINITY_DN14484_c0_g1	GAX83965.1	hypothetical protein CEUSTIGMA_g11389.t1 [Chlamydomonas eustigma]	Chlamydomonas_eustigma	42.6	6.5e-54
TRINITY_DN14485_c0_g1	GAQ82739.1	arginine methyltransferase [Klebsormidium nitens]	Klebsormidium_nitens	47.7	6.8e-96
TRINITY_DN14485_c1_g1	PSC69723.1	U4 U6 small nuclear ribonucleo PRP4 [Micractinium conductrix]	Micractinium_conductrix	40.7	6.9e-41
TRINITY_DN14487_c2_g1	BAJ96807.1	predicted protein [Hordeum vulgare subsp. vulgare]	Hordeum_vulgare	40.5	1e-175
TRINITY_DN14489_c1_g2	XP_020702515.1	40S ribosomal protein S19-1-like [Dendrobium catenatum]	Dendrobium_catenatum	62.8	5.8e-47
TRINITY_DN14490_c0_g1	XP_007512015.1	predicted protein [Bathycoccus prasinos]	Bathycoccus_prasinos	35.4	2.5e-13
TRINITY_DN14490_c0_g6	NP_001152046.1	appr-1-p processing enzyme family protein [Zea mays]	Zea_mays	30.4	6.1e-23
TRINITY_DN14494_c2_g2	XP_004984070.2	3beta-hydroxysteroid-dehydrogenase/decarboxylase [Setaria italica]	Setaria_italica	30.7	9.4e-28
TRINITY_DN14494_c2_g3	XP_012702890.1	histone H3-like centromeric protein CSE4 [Setaria italica]	Setaria_italica	94.4	5.2e-65
TRINITY_DN14494_c2_g7	XP_006307540.1	3beta-hydroxysteroid-dehydrogenase/decarboxylase isoform X1 [Capsella rubella]	Capsella_rubella	33.1	2.1e-28
TRINITY_DN14494_c3_g3	XP_005644132.1	ribosomal protein L15, partial [Coccomyxa subellipsoidea C-169]	Coccomyxa_subellipsoidea	52.7	2.9e-43
TRINITY_DN14496_c0_g1	XP_002504708.1	predicted protein [Micromonas commoda]	Micromonas_commoda	48	6.7e-32
TRINITY_DN14496_c0_g2	GAQ80469.1	alcohol dehydrogenase (NADP+) [Klebsormidium nitens]	Klebsormidium_nitens	46.3	4.6e-68
TRINITY_DN14496_c0_g3	XP_009399206.1	PREDICTED: protein disulfide-isomerase-like [Musa acuminata subsp. malaccensis]	Musa_acuminata	30.9	2.7e-44
TRINITY_DN14496_c1_g1	XP_023907127.1	b(0,+)-type amino acid transporter 1-like [Quercus suber]	Quercus_suber	29.7	4.6e-38
TRINITY_DN14497_c0_g1	XP_023883604.1	elongation factor 1-beta-like [Quercus suber]	Quercus_suber	59	5.5e-24
TRINITY_DN14497_c1_g2	XP_023926192.1	vacuolar protein sorting-associated protein IST1-like [Quercus suber]	Quercus_suber	46.7	2.6e-18
TRINITY_DN14497_c2_g3	EFJ31409.1	hypothetical protein SELMODRAFT_87617, partial [Selaginella moellendorffii]	Selaginella_moellendorffii	38.6	3.5e-77
TRINITY_DN14497_c2_g9	ACF79441.1	unknown [Zea mays]	Zea_mays	43.6	1.1e-65
TRINITY_DN14500_c0_g1	XP_001415398.1	predicted protein [Ostreococcus lucimarinus CCE9901]	Ostreococcus_sp._'lucimarinus'	48.7	7.9e-28
TRINITY_DN14501_c0_g3	XP_003058038.1	predicted protein [Micromonas pusilla CCMP1545]	Micromonas_pusilla	33	3.3e-20
TRINITY_DN14501_c0_g8	XP_002969983.1	MOB kinase activator-like 1A isoform X1 [Selaginella moellendorffii]	Selaginella_moellendorffii	66.5	5.7e-78
TRINITY_DN14502_c0_g2	XP_023744809.1	uncharacterized protein K02A2.6-like, partial [Lactuca sativa]	Lactuca_sativa	37.3	6e-07
TRINITY_DN14505_c3_g1	PRW60562.1	kelch 10 [Chlorella sorokiniana]	Chlorella_sorokiniana	29.8	1.1e-18
TRINITY_DN14508_c0_g6	GAQ83768.1	cytochrome p450 [Klebsormidium nitens]	Klebsormidium_nitens	30.1	4.6e-34
TRINITY_DN14509_c2_g1	KDD73677.1	hypothetical protein H632_c1936p0 [Helicosporidium sp. ATCC 50920]	Helicosporidium_sp._ATCC_50920	45.6	1.5e-11
TRINITY_DN14509_c2_g3	BAJ88019.1	predicted protein [Hordeum vulgare subsp. vulgare]	Hordeum_vulgare	43.3	7.4e-41
TRINITY_DN14509_c5_g1	GBG73965.1	hypothetical protein CBR_g17677 [Chara braunii]	Chara_braunii	50.2	6e-81
TRINITY_DN14510_c0_g1	XP_023886086.1	alkaline protease 2-like [Quercus suber]	Quercus_suber	30.8	5.5e-45
TRINITY_DN14512_c0_g1	XP_027909690.1	protein AF-10 isoform X2 [Vigna unguiculata]	Vigna_unguiculata	38.1	4.4e-31
TRINITY_DN14512_c0_g2	XP_011395658.1	RNA-binding protein 45 [Auxenochlorella protothecoides]	Auxenochlorella_protothecoides	31.9	8.7e-29
TRINITY_DN14514_c0_g1	NP_001154706.1	DEAD/DEAH box RNA helicase family protein [Arabidopsis thaliana]	Arabidopsis_thaliana	48.8	2.1e-151
TRINITY_DN14516_c0_g1	XP_006829398.1	ultraviolet-B receptor UVR8 isoform X2 [Amborella trichopoda]	Amborella_trichopoda	39	1.2e-16
TRINITY_DN14516_c0_g2	KDD73507.1	hypothetical protein H632_c2107p0, partial [Helicosporidium sp. ATCC 50920]	Helicosporidium_sp._ATCC_50920	45.3	2e-26
TRINITY_DN14516_c0_g3	XP_003604913.1	NADPH-dependent aldo-keto reductase, chloroplastic [Medicago truncatula]	Medicago_truncatula	41.4	1.3e-21
TRINITY_DN14517_c0_g4	XP_020185668.1	conserved oligomeric Golgi complex subunit 6-like [Aegilops tauschii subsp. tauschii]	Aegilops_tauschii	26.7	2.2e-30
TRINITY_DN14517_c0_g6	XP_005652343.1	component of oligomeric golgi complex 6 [Coccomyxa subellipsoidea C-169]	Coccomyxa_subellipsoidea	43.4	6.1e-18
TRINITY_DN14519_c0_g5	XP_023909034.1	probable chloride channel protein UM03490-D [Quercus suber]	Quercus_suber	39.8	3.9e-152
TRINITY_DN14523_c0_g1	RAL54476.1	hypothetical protein DM860_001604 [Cuscuta australis]	Cuscuta_australis	24.8	4.4e-27
TRINITY_DN14524_c1_g1	XP_005647254.1	hypothetical protein COCSUDRAFT_42345 [Coccomyxa subellipsoidea C-169]	Coccomyxa_subellipsoidea	24.2	1.2e-11
TRINITY_DN14524_c1_g3	XP_015158725.1	PREDICTED: probable ADP-ribosylation factor GTPase-activating protein AGD5 isoform X1 [Solanum tuberosum]	Solanum_tuberosum	44.9	1.4e-21
TRINITY_DN14524_c1_g8	XP_004494933.1	histone-lysine N-methyltransferase EZA1-like [Cicer arietinum]	Cicer_arietinum	40.2	2.4e-68
TRINITY_DN14526_c7_g1	BAJ95457.1	predicted protein [Hordeum vulgare subsp. vulgare]	Hordeum_vulgare	40.3	1.5e-29
TRINITY_DN14528_c0_g1	XP_005647685.1	rab GDP dissociation inhibitor protein [Coccomyxa subellipsoidea C-169]	Coccomyxa_subellipsoidea	41.6	8.3e-85
TRINITY_DN14530_c3_g2	PSC68897.1	Estradiol 17-beta-dehydrogenase 12 [Micractinium conductrix]	Micractinium_conductrix	34.7	1.7e-24
TRINITY_DN14532_c0_g2	XP_022860361.1	integrin-linked protein kinase 1-like isoform X4 [Olea europaea var. sylvestris]	Olea_europaea	44.3	2.9e-06
TRINITY_DN14533_c0_g2	XP_022742874.1	mRNA-capping enzyme-like isoform X2 [Durio zibethinus]	Durio_zibethinus	45.1	9.3e-18
TRINITY_DN14533_c0_g9	XP_003055797.1	predicted protein [Micromonas pusilla CCMP1545]	Micromonas_pusilla	39.3	3e-09
TRINITY_DN14534_c0_g7	XP_006582625.1	uncharacterized protein LOC102668600 [Glycine max]	Glycine_max	47.5	1.5e-06
TRINITY_DN14535_c0_g2	XP_002958142.1	hypothetical protein VOLCADRAFT_107987 [Volvox carteri f. nagariensis]	Volvox_carteri	48.2	6.6e-06
TRINITY_DN14535_c2_g2	XP_022838144.1	Cation-transporting P-type ATPase, C-terminal [Ostreococcus tauri]	Ostreococcus_tauri	54.1	3.1e-40
TRINITY_DN14536_c1_g1	XP_009629265.1	PREDICTED: uncharacterized protein LOC104119450 isoform X1 [Nicotiana tomentosiformis]	Nicotiana_tomentosiformis	30.4	1.7e-10
TRINITY_DN14536_c1_g2	XP_009399218.1	PREDICTED: polyubiquitin [Musa acuminata subsp. malaccensis]	Musa_acuminata	26.8	1e-07
TRINITY_DN14536_c1_g6	XP_020202873.1	thioredoxin-like protein YLS8 [Cajanus cajan]	Cajanus_cajan	83.1	6.9e-70
TRINITY_DN14537_c1_g5	OAE26312.1	hypothetical protein AXG93_3040s1300 [Marchantia polymorpha subsp. ruderalis]	Marchantia_polymorpha	55.2	2.5e-167
TRINITY_DN14537_c1_g7	BAJ95850.1	predicted protein [Hordeum vulgare subsp. vulgare]	Hordeum_vulgare	42	2.7e-103
TRINITY_DN14538_c0_g1	XP_023753174.1	uncharacterized protein K02A2.6-like, partial [Lactuca sativa]	Lactuca_sativa	42.2	1.7e-30
TRINITY_DN14542_c1_g2	XP_024363362.1	pre-mRNA-splicing factor CWC22 homolog [Physcomitrella patens]	Physcomitrella_patens	65.8	3.7e-165
TRINITY_DN14542_c1_g7	XP_002508985.1	predicted protein, partial [Micromonas commoda]	Micromonas_commoda	82	1.1e-16
TRINITY_DN14543_c0_g1	KXZ41741.1	hypothetical protein GPECTOR_299g811 [Gonium pectorale]	Gonium_pectorale	60.2	9.2e-24
TRINITY_DN14544_c2_g7	OWM88560.1	hypothetical protein CDL15_Pgr002327 [Punica granatum]	Punica_granatum	47.4	8.6e-34
TRINITY_DN14546_c2_g2	XP_009351265.1	PREDICTED: endothelin-converting enzyme 1-like [Pyrus x bretschneideri]	Pyrus_x_bretschneideri	28.8	5.9e-75
TRINITY_DN14549_c1_g1	PKA55077.1	hypothetical protein AXF42_Ash003714 [Apostasia shenzhenica]	Apostasia_shenzhenica	33.5	4.4e-36
TRINITY_DN14550_c2_g2	XP_026388359.1	ras-related protein RABD1-like isoform X2 [Papaver somniferum]	Papaver_somniferum	74.3	1.2e-55
TRINITY_DN14550_c2_g4	XP_024528216.1	cleavage stimulation factor subunit 77 [Selaginella moellendorffii]	Selaginella_moellendorffii	33.6	1.5e-110
TRINITY_DN14552_c1_g1	PNW77443.1	hypothetical protein CHLRE_10g436800v5 [Chlamydomonas reinhardtii]	Chlamydomonas_reinhardtii	53.3	8e-06
TRINITY_DN14553_c0_g1	XP_025614583.1	ras-related protein RABA1f-like [Arachis hypogaea]	Arachis_hypogaea	50.2	8.2e-49
TRINITY_DN14554_c0_g1	XP_004503268.1	phosphoethanolamine N-methyltransferase-like [Cicer arietinum]	Cicer_arietinum	21	1.8e-08
TRINITY_DN14555_c0_g1	GAQ80006.1	hypothetical protein KFL_000440080 [Klebsormidium nitens]	Klebsormidium_nitens	28.2	3.7e-08
TRINITY_DN14555_c0_g2	PTQ34713.1	hypothetical protein MARPO_0077s0041 [Marchantia polymorpha]	Marchantia_polymorpha	27.5	3.4e-06
TRINITY_DN14557_c1_g3	RMZ54968.1	hypothetical protein APUTEX25_000485, partial [Auxenochlorella protothecoides]	Auxenochlorella_protothecoides	42.5	7.4e-12
TRINITY_DN14557_c2_g3	XP_006853567.1	protein RTF1 homolog [Amborella trichopoda]	Amborella_trichopoda	31.5	3.6e-20
TRINITY_DN14558_c1_g2	ACF79317.1	unknown [Zea mays]	Zea_mays	43.4	2.3e-25
TRINITY_DN14559_c0_g3	XP_023901889.1	solute carrier family 25 member 40-like [Quercus suber]	Quercus_suber	37.5	1.5e-42
TRINITY_DN14560_c0_g4	GAQ85181.1	hypothetical protein KFL_002230020 [Klebsormidium nitens]	Klebsormidium_nitens	25.6	1.4e-35
TRINITY_DN14561_c0_g1	APW77269.1	GT61_10 [Plantago ovata]	Plantago_ovata	27.6	4.6e-08
TRINITY_DN14563_c1_g1	XP_002509000.1	predicted protein, partial [Micromonas commoda]	Micromonas_commoda	33.2	7.7e-23
TRINITY_DN14563_c2_g1	AIU48676.1	RabGAP/TBC domain-containing protein, partial [Dioscorea oppositifolia]	Dioscorea_oppositifolia	33.6	1.2e-26
TRINITY_DN14563_c2_g3	KDD75851.1	Ras family protein [Helicosporidium sp. ATCC 50920]	Helicosporidium_sp._ATCC_50920	42.3	2.7e-39
TRINITY_DN14565_c3_g1	XP_012830301.1	PREDICTED: CBL-interacting protein kinase 5-like [Erythranthe guttata]	Erythranthe_guttata	27.4	3.1e-31
TRINITY_DN14565_c3_g3	XP_016726777.1	PREDICTED: ras-related protein RABE1c-like isoform X1 [Gossypium hirsutum]	Gossypium_hirsutum	39.7	3.8e-42
TRINITY_DN14568_c0_g1	XP_020163181.1	acetyl-CoA acetyltransferase, cytosolic 1-like [Aegilops tauschii subsp. tauschii]	Aegilops_tauschii	52.7	1.5e-48
TRINITY_DN14569_c0_g1	XP_024399957.1	lysine-specific demethylase JMJ30-like [Physcomitrella patens]	Physcomitrella_patens	31	6e-24
TRINITY_DN14573_c1_g2	GAQ77577.1	enoyl-CoA isomerase [Klebsormidium nitens]	Klebsormidium_nitens	39.2	1e-34
TRINITY_DN14576_c1_g1	GBG72063.1	hypothetical protein CBR_g10998 [Chara braunii]	Chara_braunii	31.2	1.2e-62
TRINITY_DN14577_c0_g10	XP_021973088.1	protein ABHD17B-like [Helianthus annuus]	Helianthus_annuus	45.8	1.7e-41
TRINITY_DN14577_c0_g3	XP_005843019.1	hypothetical protein CHLNCDRAFT_33302 [Chlorella variabilis]	Chlorella_variabilis	69.4	7.6e-50
TRINITY_DN14577_c0_g4	GBG88330.1	hypothetical protein CBR_g46897 [Chara braunii]	Chara_braunii	28.5	1.6e-06
TRINITY_DN14578_c1_g1	GAQ77758.1	Serine/Threonine protein kinase family protein [Klebsormidium nitens]	Klebsormidium_nitens	46.5	1.5e-79
TRINITY_DN14578_c1_g3	GAQ84192.1	protein with ubiquitin conjugating enzyme domain [Klebsormidium nitens]	Klebsormidium_nitens	35.4	8.2e-18
TRINITY_DN14578_c1_g5	XP_023902222.1	protease KEX1-like [Quercus suber]	Quercus_suber	40.6	1.3e-85
TRINITY_DN14583_c1_g1	KMZ62033.1	AP-2 complex subunit mu [Zostera marina]	Zostera_marina	46.9	1.9e-111
TRINITY_DN14583_c1_g6	BAJ94652.1	predicted protein [Hordeum vulgare subsp. vulgare]	Hordeum_vulgare	67.1	1.1e-93
TRINITY_DN14585_c3_g2	KXZ45505.1	hypothetical protein GPECTOR_54g247 [Gonium pectorale]	Gonium_pectorale	67.6	1.2e-25
TRINITY_DN14585_c3_g3	GAQ84943.1	Anaphase promoting complex Cdc20 subunits [Klebsormidium nitens]	Klebsormidium_nitens	46.8	1.2e-101
TRINITY_DN14586_c1_g1	XP_001702746.1	speract/scavenger receptor, transmembrane glycoprotein [Chlamydomonas reinhardtii]	Chlamydomonas_reinhardtii	43.8	1.6e-17
TRINITY_DN14589_c0_g2	XP_020599951.1	FK506-binding protein 2-like isoform X1 [Phalaenopsis equestris]	Phalaenopsis_equestris	35.9	2.5e-13
TRINITY_DN14591_c0_g1	KXZ52869.1	hypothetical protein GPECTOR_8g250 [Gonium pectorale]	Gonium_pectorale	32.8	3.4e-09
TRINITY_DN14592_c0_g1	RWR76638.1	E3 ubiquitin-protein ligase SP1 [Cinnamomum micranthum f. kanehirae]	Cinnamomum_micranthum	41.9	4.9e-10
TRINITY_DN14593_c3_g2	GBG72592.1	hypothetical protein CBR_g12164 [Chara braunii]	Chara_braunii	50	1.5e-08
TRINITY_DN14593_c3_g4	GBG69193.1	hypothetical protein CBR_g3892 [Chara braunii]	Chara_braunii	36.4	4.5e-65
TRINITY_DN14597_c4_g1	XP_022775112.1	peptidyl-prolyl cis-trans isomerase CYP65-like [Durio zibethinus]	Durio_zibethinus	56.1	1.5e-65
TRINITY_DN14602_c1_g3	XP_001691833.1	acid phosphatase, partial [Chlamydomonas reinhardtii]	Chlamydomonas_reinhardtii	42.8	1e-32
TRINITY_DN14606_c0_g1	XP_002499677.1	Propeptide/ADAMs family protein fusion [Micromonas commoda]	Micromonas_commoda	29.9	4.1e-06
TRINITY_DN14608_c5_g1	XP_023871176.1	serine/threonine-protein phosphatase 2A 56 kDa regulatory subunit alpha isoform-like [Quercus suber]	Quercus_suber	52.4	2.2e-128
TRINITY_DN14610_c3_g1	XP_001689750.1	uridine 5'- monophosphate synthase [Chlamydomonas reinhardtii]	Chlamydomonas_reinhardtii	47.3	6.8e-51
TRINITY_DN14610_c3_g3	XP_022899538.1	uridine 5'-monophosphate synthase-like [Olea europaea var. sylvestris]	Olea_europaea	51.4	2.7e-24
TRINITY_DN14610_c4_g2	PRW58539.1	isocitrate NADP-dependent isoform B [Chlorella sorokiniana]	Chlorella_sorokiniana	67.8	2.9e-113
TRINITY_DN14611_c1_g7	RYQ86786.1	hypothetical protein Ahy_B10g106417 isoform C [Arachis hypogaea]	Arachis_hypogaea	35.8	1.3e-06
TRINITY_DN14612_c1_g1	BAJ94692.1	predicted protein [Hordeum vulgare subsp. vulgare]	Hordeum_vulgare	44.4	2.1e-134
TRINITY_DN14612_c1_g4	XP_027349953.1	eukaryotic translation initiation factor 3 subunit C-like [Abrus precatorius]	Abrus_precatorius	43.4	4.5e-10
TRINITY_DN14615_c0_g1	GAX80571.1	hypothetical protein CEUSTIGMA_g8008.t1 [Chlamydomonas eustigma]	Chlamydomonas_eustigma	33.1	8e-173
TRINITY_DN14617_c0_g1	XP_002955105.1	hypothetical protein VOLCADRAFT_95944 [Volvox carteri f. nagariensis]	Volvox_carteri	34.3	2.5e-10
TRINITY_DN14619_c0_g1	OUS42553.1	hypothetical protein BE221DRAFT_195958 [Ostreococcus tauri]	Ostreococcus_tauri	57.1	1e-162
TRINITY_DN14619_c0_g6	XP_011089536.1	heat shock cognate protein 80 [Sesamum indicum]	Sesamum_indicum	71.8	1.2e-267
TRINITY_DN14623_c3_g1	GAQ78702.1	N-acetyltransferase 10 [Klebsormidium nitens]	Klebsormidium_nitens	59.7	0
TRINITY_DN14623_c4_g1	XP_022039535.1	heterogeneous nuclear ribonucleoprotein 1-like [Helianthus annuus]	Helianthus_annuus	25.2	4.8e-06
TRINITY_DN14623_c4_g5	ABK23842.1	unknown [Picea sitchensis]	Picea_sitchensis	43.8	4.3e-18
TRINITY_DN14625_c3_g2	GBF94129.1	solute carrier family 35 member E3 [Raphidocelis subcapitata]	Raphidocelis_subcapitata	24.1	2.4e-06
TRINITY_DN14629_c1_g1	GAQ90907.1	Cation efflux family protein [Klebsormidium nitens]	Klebsormidium_nitens	52.2	4.9e-34
TRINITY_DN14629_c1_g10	PRW45408.1	FAM98B isoform B [Chlorella sorokiniana]	Chlorella_sorokiniana	28.7	3.1e-09
TRINITY_DN14631_c0_g1	GBG83234.1	hypothetical protein CBR_g36849 [Chara braunii]	Chara_braunii	45.5	2.7e-37
TRINITY_DN14631_c0_g10	EOY01091.1	Rubisco methyltransferase family protein isoform 3 [Theobroma cacao]	Theobroma_cacao	26	1.6e-23
TRINITY_DN14631_c0_g14	XP_023890931.1	probable ubiquitin carboxyl-terminal hydrolase 3 [Quercus suber]	Quercus_suber	42.5	1.3e-16
TRINITY_DN14631_c0_g8	GBG66673.1	hypothetical protein CBR_g66808 [Chara braunii]	Chara_braunii	33.7	3e-27
TRINITY_DN14633_c1_g2	GBF87469.1	hypothetical protein Rsub_00180 [Raphidocelis subcapitata]	Raphidocelis_subcapitata	26.7	1.4e-13
TRINITY_DN14636_c0_g1	GAQ90877.1	Dipeptidyl peptidase III [Klebsormidium nitens]	Klebsormidium_nitens	46.4	1.6e-134
TRINITY_DN14637_c1_g1	EFJ05316.1	hypothetical protein SELMODRAFT_431654 [Selaginella moellendorffii]	Selaginella_moellendorffii	27.1	6.8e-09
TRINITY_DN14637_c3_g3	OAE26158.1	hypothetical protein AXG93_903s1190 [Marchantia polymorpha subsp. ruderalis]	Marchantia_polymorpha	63.8	2.1e-83
TRINITY_DN14639_c0_g3	PTQ27291.1	hypothetical protein MARPO_0207s0002 [Marchantia polymorpha]	Marchantia_polymorpha	29.7	4.3e-09
TRINITY_DN14641_c0_g1	XP_002955841.1	hypothetical protein VOLCADRAFT_121469 [Volvox carteri f. nagariensis]	Volvox_carteri	41.5	7e-26
TRINITY_DN14642_c0_g1	GBG62134.1	hypothetical protein CBR_g29334 [Chara braunii]	Chara_braunii	37	9.2e-131
TRINITY_DN14644_c0_g3	PSC70239.1	OTU domain-containing 7B isoform X2 [Micractinium conductrix]	Micractinium_conductrix	29.3	2.5e-12
TRINITY_DN14644_c0_g4	PNW88970.1	hypothetical protein CHLRE_01g052650v5 [Chlamydomonas reinhardtii]	Chlamydomonas_reinhardtii	52.8	1.5e-31
TRINITY_DN14644_c0_g5	GAQ90682.1	DNA repair protein RAD50 [Klebsormidium nitens]	Klebsormidium_nitens	40.3	9.9e-67
TRINITY_DN14645_c0_g1	XP_006649803.1	PREDICTED: serine/arginine-rich splicing factor SR45a [Oryza brachyantha]	Oryza_brachyantha	46.8	4.9e-07
TRINITY_DN14646_c1_g2	XP_008438074.1	PREDICTED: putative threonine aspartase isoform X1 [Cucumis melo]	Cucumis_melo	53.7	3.8e-06
TRINITY_DN14646_c4_g2	XP_022636332.1	uncharacterized protein LOC106762438 [Vigna radiata var. radiata]	Vigna_radiata	31.7	5.9e-08
TRINITY_DN14646_c4_g6	EPS70048.1	hypothetical protein M569_04714 [Genlisea aurea]	Genlisea_aurea	47.4	4.2e-71
TRINITY_DN14647_c1_g1	XP_023911753.1	cystathionine gamma-lyase-like [Quercus suber]	Quercus_suber	51.4	7.4e-100
TRINITY_DN14650_c1_g1	GAQ90285.1	Protein kinase superfamily protein [Klebsormidium nitens]	Klebsormidium_nitens	29.7	1.3e-24
TRINITY_DN14650_c1_g2	GAX86156.1	hypothetical protein CEUSTIGMA_g13569.t1 [Chlamydomonas eustigma]	Chlamydomonas_eustigma	41.2	2.5e-12
TRINITY_DN14653_c2_g1	XP_024385568.1	jmjC domain-containing histone demethylation protein 1-like [Physcomitrella patens]	Physcomitrella_patens	51	3.1e-41
TRINITY_DN14653_c2_g2	XP_009408856.1	PREDICTED: V-type proton ATPase subunit B2 [Musa acuminata subsp. malaccensis]	Musa_acuminata	85.2	9.2e-119
TRINITY_DN14654_c2_g1	XP_019239460.1	PREDICTED: mitogen-activated protein kinase kinase kinase NPK1-like [Nicotiana attenuata]	Nicotiana_attenuata	33.8	4.8e-17
TRINITY_DN14654_c2_g2	ASL24777.1	mitochondrial ATP synthase subunit 9 [Allium cepa]	Allium_cepa	81	2.8e-26
TRINITY_DN14655_c2_g1	XP_024989726.1	protein argonaute 1-like [Cynara cardunculus var. scolymus]	Cynara_cardunculus	47.2	3e-104
TRINITY_DN14657_c0_g1	PWA61533.1	DNA polymerase A [Artemisia annua]	Artemisia_annua	31.7	6.8e-61
TRINITY_DN14659_c0_g1	RYR68827.1	hypothetical protein Ahy_A03g015298 [Arachis hypogaea]	Arachis_hypogaea	82.9	2.9e-24
TRINITY_DN14660_c1_g4	XP_020110178.1	probable nucleoside diphosphate kinase 5 isoform X2 [Ananas comosus]	Ananas_comosus	48.9	6.2e-28
TRINITY_DN14660_c1_g5	PRW59960.1	putative aldo-keto reductase 2 [Chlorella sorokiniana]	Chlorella_sorokiniana	46.8	3.6e-46
TRINITY_DN14660_c1_g7	NP_001150074.2	uncharacterized protein LOC100283703 [Zea mays]	Zea_mays	47.2	1.8e-62
TRINITY_DN14661_c1_g1	PTQ43440.1	hypothetical protein MARPO_0025s0122 [Marchantia polymorpha]	Marchantia_polymorpha	62.5	9.2e-110
TRINITY_DN14661_c1_g3	GAQ81411.1	Metallopeptidase M24 family protein [Klebsormidium nitens]	Klebsormidium_nitens	71.8	1.3e-10
TRINITY_DN14663_c2_g1	BAK00802.1	predicted protein [Hordeum vulgare subsp. vulgare]	Hordeum_vulgare	58.5	0
TRINITY_DN14663_c2_g5	NP_001333185.1	uncharacterized protein LOC100304385 [Zea mays]	Zea_mays	35.4	1.6e-81
TRINITY_DN14664_c2_g2	XP_003061009.1	major facilitator superfamily [Micromonas pusilla CCMP1545]	Micromonas_pusilla	44.3	1.8e-84
TRINITY_DN14666_c0_g4	XP_022839692.1	Protein phosphatase 2C [Ostreococcus tauri]	Ostreococcus_tauri	53.2	3e-27
TRINITY_DN14667_c0_g1	XP_004308497.1	PREDICTED: protein VASCULAR ASSOCIATED DEATH 1, chloroplastic isoform X2 [Fragaria vesca subsp. vesca]	Fragaria_vesca	38.4	1.1e-16
TRINITY_DN14667_c2_g1	XP_016573615.1	PREDICTED: chaperonin CPN60-2, mitochondrial [Capsicum annuum]	Capsicum_annuum	58.7	7.4e-177
TRINITY_DN14673_c0_g1	XP_012836094.1	PREDICTED: serine/threonine-protein kinase CTR1-like isoform X1 [Erythranthe guttata]	Erythranthe_guttata	35.7	6.3e-31
TRINITY_DN14679_c2_g4	B3EWP4.1	RecName: Full=Defensin 2; AltName: Allergen=Ara h 13.0101; Flags: Precursor	Arachis_hypogaea	96.2	2.1e-41
TRINITY_DN14681_c0_g1	XP_003056398.1	predicted protein [Micromonas pusilla CCMP1545]	Micromonas_pusilla	26.8	1e-12
TRINITY_DN14681_c0_g2	XP_021676321.1	ubiquitin carboxyl-terminal hydrolase 5-like isoform X1 [Hevea brasiliensis]	Hevea_brasiliensis	23.3	1.6e-29
TRINITY_DN14684_c2_g3	GBG63472.1	hypothetical protein CBR_g38090 [Chara braunii]	Chara_braunii	28.4	6.1e-06
TRINITY_DN14689_c0_g1	PKA46528.1	hypothetical protein AXF42_Ash012661 [Apostasia shenzhenica]	Apostasia_shenzhenica	38.8	5.7e-16
TRINITY_DN14692_c0_g1	XP_023917606.1	N-acetylglucosamine-6-phosphate deacetylase-like [Quercus suber]	Quercus_suber	39	2.8e-68
TRINITY_DN14693_c1_g3	XP_002983424.1	DNA-directed RNA polymerases II, IV and V subunit 3 [Selaginella moellendorffii]	Selaginella_moellendorffii	35.1	4.3e-25
TRINITY_DN14693_c3_g1	KZV14869.1	GMP synthase (glutamine-hydrolysing) [Dorcoceras hygrometricum]	Dorcoceras_hygrometricum	35.7	6.4e-69
TRINITY_DN14694_c0_g1	XP_024399323.1	vacuole membrane protein KMS1-like [Physcomitrella patens]	Physcomitrella_patens	40.1	1.5e-59
TRINITY_DN14694_c1_g3	PIN01456.1	Ypt/Rab GTPase activating protein [Handroanthus impetiginosus]	Handroanthus_impetiginosus	29.8	8.7e-21
TRINITY_DN14694_c1_g4	XP_023916170.1	succinate/fumarate mitochondrial transporter-like [Quercus suber]	Quercus_suber	37.5	5.9e-49
TRINITY_DN14695_c2_g1	XP_019446779.1	PREDICTED: heat shock factor protein HSF24-like [Lupinus angustifolius]	Lupinus_angustifolius	45.3	3.1e-19
TRINITY_DN14697_c4_g1	XP_005845381.1	hypothetical protein CHLNCDRAFT_58577 [Chlorella variabilis]	Chlorella_variabilis	35.2	2.7e-32
TRINITY_DN14697_c5_g1	GAQ87478.1	signal recognition particle receptor [Klebsormidium nitens]	Klebsormidium_nitens	38.8	1.1e-16
TRINITY_DN14697_c5_g2	XP_010680162.1	PREDICTED: signal recognition particle receptor subunit alpha [Beta vulgaris subsp. vulgaris]	Beta_vulgaris	52.4	2.1e-89
TRINITY_DN14703_c0_g4	XP_001689661.1	calreticulin 2, calcium-binding protein [Chlamydomonas reinhardtii]	Chlamydomonas_reinhardtii	69.7	2.4e-45
TRINITY_DN14705_c0_g3	XP_024531208.1	patatin-like protein 2 [Selaginella moellendorffii]	Selaginella_moellendorffii	25.7	2.3e-09
TRINITY_DN14706_c1_g1	PRW55986.1	ran guanine nucleotide release factor [Chlorella sorokiniana]	Chlorella_sorokiniana	37.3	2e-25
TRINITY_DN14706_c1_g2	XP_001689825.1	3',5'-cyclic-nucleotide phosphodiesterase, partial [Chlamydomonas reinhardtii]	Chlamydomonas_reinhardtii	36.8	8.5e-46
TRINITY_DN14706_c1_g5	XP_019167227.1	PREDICTED: ras-related protein RABA6a-like [Ipomoea nil]	Ipomoea_nil	32	8.1e-09
TRINITY_DN14707_c0_g10	XP_002267244.1	PREDICTED: p21-activated protein kinase-interacting protein 1-like [Vitis vinifera]	Vitis_vinifera	31	5.9e-37
TRINITY_DN14709_c0_g1	XP_002966338.2	protein-tyrosine-phosphatase PTP1 [Selaginella moellendorffii]	Selaginella_moellendorffii	34.4	5.1e-31
TRINITY_DN14711_c4_g3	GAQ79186.1	hypothetical protein KFL_000260010 [Klebsormidium nitens]	Klebsormidium_nitens	29.8	1.8e-09
TRINITY_DN14715_c3_g1	XP_027121586.1	DNA-repair protein XRCC1-like [Coffea arabica]	Coffea_arabica	57.1	1e-23
TRINITY_DN14717_c3_g1	OAE30113.1	hypothetical protein AXG93_1112s1310 [Marchantia polymorpha subsp. ruderalis]	Marchantia_polymorpha	34.3	3.5e-06
TRINITY_DN14717_c3_g2	XP_020702011.1	TBC1 domain family member 15-like [Dendrobium catenatum]	Dendrobium_catenatum	31.2	7.9e-18
TRINITY_DN14718_c1_g1	XP_023925582.1	mitogen-activated protein kinase Hog1 [Quercus suber]	Quercus_suber	48.5	1.5e-87
TRINITY_DN14718_c1_g5	BAK00493.1	predicted protein [Hordeum vulgare subsp. vulgare]	Hordeum_vulgare	44.9	1.8e-98
TRINITY_DN14718_c1_g6	GBF94543.1	tubulin epsilon chain [Raphidocelis subcapitata]	Raphidocelis_subcapitata	54.4	7.7e-15
TRINITY_DN14727_c0_g2	XP_024522283.1	phosphatidylinositol 3,4,5-trisphosphate 5-phosphatase 2B-like isoform X2 [Selaginella moellendorffii]	Selaginella_moellendorffii	33.2	5.6e-19
TRINITY_DN14727_c0_g3	XP_002509050.1	predicted protein [Micromonas commoda]	Micromonas_commoda	32.2	1.7e-10
TRINITY_DN14731_c0_g1	XP_013903438.1	putative AAA domain-containing protein [Monoraphidium neglectum]	Monoraphidium_neglectum	60.3	1.8e-12
TRINITY_DN14732_c1_g1	GAX85524.1	hypothetical protein CEUSTIGMA_g12940.t1 [Chlamydomonas eustigma]	Chlamydomonas_eustigma	51.1	1.8e-46
TRINITY_DN14734_c1_g1	XP_011085878.1	zinc finger protein 830 [Sesamum indicum]	Sesamum_indicum	51.1	4.8e-06
TRINITY_DN14734_c4_g4	PTQ28105.1	hypothetical protein MARPO_0173s0008 [Marchantia polymorpha]	Marchantia_polymorpha	30.4	1.5e-33
TRINITY_DN14735_c0_g1	XP_002504648.1	protein kinase [Micromonas commoda]	Micromonas_commoda	46.3	5.8e-56
TRINITY_DN14737_c0_g14	ABK22026.1	unknown [Picea sitchensis]	Picea_sitchensis	72.8	9.9e-142
TRINITY_DN14737_c0_g3	XP_021769145.1	26S proteasome non-ATPase regulatory subunit 7 homolog A-like [Chenopodium quinoa]	Chenopodium_quinoa	58	5.4e-93
TRINITY_DN14739_c0_g1	GAX78238.1	hypothetical protein CEUSTIGMA_g5680.t1 [Chlamydomonas eustigma]	Chlamydomonas_eustigma	57.5	5.6e-224
TRINITY_DN14740_c2_g6	XP_019169233.1	PREDICTED: exonuclease 1 [Ipomoea nil]	Ipomoea_nil	40	7.1e-47
TRINITY_DN14745_c0_g10	XP_023925376.1	cullin-1-like [Quercus suber]	Quercus_suber	64.2	7.3e-22
TRINITY_DN14745_c0_g2	XP_024527878.1	zinc finger protein 862-like [Selaginella moellendorffii]	Selaginella_moellendorffii	44.9	2.5e-09
TRINITY_DN14747_c0_g2	PRQ46594.1	putative nucleotidyltransferase, Ribonuclease H [Rosa chinensis]	Rosa_chinensis	35.1	2.4e-140
TRINITY_DN14750_c0_g1	XP_024538594.1	ras-related protein RABE1c [Selaginella moellendorffii]	Selaginella_moellendorffii	83.3	6.2e-32
TRINITY_DN14754_c0_g2	GBG66017.1	hypothetical protein CBR_g54997 [Chara braunii]	Chara_braunii	26.5	5e-59
TRINITY_DN14757_c1_g3	XP_008801706.1	pre-mRNA-splicing factor 18-like [Phoenix dactylifera]	Phoenix_dactylifera	36.8	7e-50
TRINITY_DN14762_c1_g2	KXZ41449.1	hypothetical protein GPECTOR_462g370 [Gonium pectorale]	Gonium_pectorale	67.7	2.3e-91
TRINITY_DN14762_c3_g1	PSS36468.1	U1 small nuclear ribonucleoprotein [Actinidia chinensis var. chinensis]	Actinidia_chinensis	56.4	5.8e-27
TRINITY_DN14762_c3_g2	XP_010933716.1	PREDICTED: U1 small nuclear ribonucleoprotein 70 kDa-like isoform X1 [Elaeis guineensis]	Elaeis_guineensis	52.6	2.4e-14
TRINITY_DN14763_c0_g4	XP_015872068.1	uncharacterized protein LOC107409145 [Ziziphus jujuba]	Ziziphus_jujuba	30.9	4.6e-07
TRINITY_DN14766_c0_g2	XP_024361048.1	(6-4)DNA photolyase-like isoform X2 [Physcomitrella patens]	Physcomitrella_patens	36.6	1.5e-35
TRINITY_DN14768_c2_g2	XP_010265464.1	PREDICTED: FGGY carbohydrate kinase domain-containing protein-like isoform X1 [Nelumbo nucifera]	Nelumbo_nucifera	56.7	1.5e-50
TRINITY_DN14770_c0_g3	XP_020572757.1	serine/arginine-rich-splicing factor SR34-like [Phalaenopsis equestris]	Phalaenopsis_equestris	51.6	5.5e-45
TRINITY_DN14770_c1_g1	XP_023917988.1	uncharacterized protein C56F8.02-like [Quercus suber]	Quercus_suber	25.4	1.7e-53
TRINITY_DN14770_c1_g5	XP_009420195.1	PREDICTED: vesicle-associated membrane protein 714-like isoform X1 [Musa acuminata subsp. malaccensis]	Musa_acuminata	30.3	2.9e-09
TRINITY_DN14775_c0_g2	XP_026380848.1	GDP-L-galactose phosphorylase 2-like [Papaver somniferum]	Papaver_somniferum	36.2	5e-25
TRINITY_DN14775_c0_g3	ACF79371.1	unknown [Zea mays]	Zea_mays	55.1	4.9e-22
TRINITY_DN14775_c0_g4	XP_004510901.1	glyoxylate/hydroxypyruvate reductase HPR3-like [Cicer arietinum]	Cicer_arietinum	36.8	4.2e-24
TRINITY_DN14776_c0_g1	XP_026449995.1	dual specificity protein phosphatase 1-like isoform X1 [Papaver somniferum]	Papaver_somniferum	36.5	3.8e-15
TRINITY_DN14777_c4_g1	XP_023742173.1	lysine-specific demethylase JMJ30 [Lactuca sativa]	Lactuca_sativa	33.6	1.1e-10
TRINITY_DN14778_c0_g2	XP_012472228.1	PREDICTED: 26S proteasome non-ATPase regulatory subunit 13 homolog A [Gossypium raimondii]	Gossypium_raimondii	42.8	1.7e-55
TRINITY_DN14778_c0_g4	XP_002505555.1	predicted protein [Micromonas commoda]	Micromonas_commoda	40.9	8.3e-06
TRINITY_DN14781_c2_g2	PRW60243.1	charged multivesicular body 1-like [Chlorella sorokiniana]	Chlorella_sorokiniana	51.3	1.5e-25
TRINITY_DN14784_c4_g1	XP_023881335.1	mitochondrial carnitine carrier-like [Quercus suber]	Quercus_suber	43	2e-52
TRINITY_DN14785_c3_g4	XP_020397360.1	uncharacterized protein LOC109941230 [Zea mays]	Zea_mays	38.4	3.1e-21
TRINITY_DN14785_c3_g5	PNX92970.1	Ty3/gypsy retrotransposon protein, partial [Trifolium pratense]	Trifolium_pratense	61.7	1.6e-13
TRINITY_DN14786_c2_g1	XP_010526568.1	PREDICTED: transcription initiation factor TFIID subunit 14b [Tarenaya hassleriana]	Tarenaya_hassleriana	49.1	1.5e-32
TRINITY_DN14786_c2_g2	GAQ86878.1	Cysteine proteinases superfamily protein [Klebsormidium nitens]	Klebsormidium_nitens	51.8	2.4e-191
TRINITY_DN14786_c2_g3	GBG70165.1	hypothetical protein CBR_g6296 [Chara braunii]	Chara_braunii	42.6	4.1e-20
TRINITY_DN14786_c2_g6	ACG34652.1	dehydrogenase/reductase SDR family member 2 [Zea mays]	Zea_mays	56.1	5.8e-73
TRINITY_DN14787_c3_g4	XP_011396757.1	Cytosolic Fe-S cluster assembly factor NBP35 [Auxenochlorella protothecoides]	Auxenochlorella_protothecoides	67.7	6.4e-45
TRINITY_DN14795_c1_g1	XP_027181475.1	syntaxin-22-like [Coffea eugenioides]	Coffea_eugenioides	25.4	2.3e-07
TRINITY_DN14795_c1_g4	XP_023908784.1	uncharacterized protein LOC112020457 [Quercus suber]	Quercus_suber	32.9	3.2e-40
TRINITY_DN14798_c2_g1	XP_002952744.1	NimA-related protein kinase 5 [Volvox carteri f. nagariensis]	Volvox_carteri	35.6	1.3e-36
TRINITY_DN14798_c3_g1	XP_024156766.1	cell division cycle protein 123 homolog [Rosa chinensis]	Rosa_chinensis	38.8	6.3e-38
TRINITY_DN14802_c1_g1	PTQ33571.1	hypothetical protein MARPO_0087s0013 [Marchantia polymorpha]	Marchantia_polymorpha	41.4	3.3e-85
TRINITY_DN14803_c4_g1	XP_023901528.1	kexin-like [Quercus suber]	Quercus_suber	38.2	9.9e-77
TRINITY_DN14804_c1_g4	XP_002501385.1	predicted protein [Micromonas commoda]	Micromonas_commoda	39.9	8.4e-31
TRINITY_DN14807_c0_g1	XP_002955507.1	hypothetical protein VOLCADRAFT_66018 [Volvox carteri f. nagariensis]	Volvox_carteri	37.3	3.3e-09
TRINITY_DN14808_c0_g4	GAQ91342.1	Aldo/keto reductase family protein [Klebsormidium nitens]	Klebsormidium_nitens	54	3.8e-72
TRINITY_DN14810_c0_g1	XP_013451524.1	cation/calcium exchanger 1 [Medicago truncatula]	Medicago_truncatula	37.3	9.6e-22
TRINITY_DN14812_c5_g5	XP_001698334.1	molybdenum cofactor biosynthesis protein [Chlamydomonas reinhardtii]	Chlamydomonas_reinhardtii	49.2	5.5e-96
TRINITY_DN14812_c5_g7	XP_007511434.1	predicted protein [Bathycoccus prasinos]	Bathycoccus_prasinos	41.2	1.7e-69
TRINITY_DN14812_c5_g9	ABK22399.1	unknown [Picea sitchensis]	Picea_sitchensis	60.9	3e-85
TRINITY_DN14813_c0_g3	OEL36497.1	ABC transporter G family member 11 [Dichanthelium oligosanthes]	Dichanthelium_oligosanthes	42.8	3.3e-21
TRINITY_DN14813_c0_g4	GAX85836.1	hypothetical protein CEUSTIGMA_g13251.t1 [Chlamydomonas eustigma]	Chlamydomonas_eustigma	75.8	3.8e-35
TRINITY_DN14814_c0_g1	XP_026432963.1	peptidyl-prolyl cis-trans isomerase-like [Papaver somniferum]	Papaver_somniferum	73.6	3.1e-64
TRINITY_DN14814_c1_g1	OTG37726.1	putative 43kDa postsynaptic protein, O-GlcNAc transferase [Helianthus annuus]	Helianthus_annuus	37.9	3.9e-62
TRINITY_DN14814_c1_g2	GBG66199.1	hypothetical protein CBR_g57078 [Chara braunii]	Chara_braunii	45.9	1.7e-34
TRINITY_DN14817_c1_g3	RAL40234.1	hypothetical protein DM860_008374 [Cuscuta australis]	Cuscuta_australis	24.9	8.5e-39
TRINITY_DN14817_c1_g4	XP_020583899.1	suppressor of mec-8 and unc-52 protein homolog 2 [Phalaenopsis equestris]	Phalaenopsis_equestris	33.8	4.7e-55
TRINITY_DN14817_c1_g5	XP_024517589.1	peter Pan-like protein [Selaginella moellendorffii]	Selaginella_moellendorffii	47.8	2.8e-71
TRINITY_DN14818_c0_g1	OEL15325.1	Ras-related protein RABA1f [Dichanthelium oligosanthes]	Dichanthelium_oligosanthes	60	9.2e-12
TRINITY_DN14818_c0_g3	XP_016559588.1	PREDICTED: ras-related protein RABA1c [Capsicum annuum]	Capsicum_annuum	61.2	3.5e-33
TRINITY_DN14818_c1_g1	XP_010543445.1	PREDICTED: ras-related protein RABE1d-like isoform X3 [Tarenaya hassleriana]	Tarenaya_hassleriana	42.6	1.7e-41
TRINITY_DN14819_c0_g1	ACF79131.1	unknown [Zea mays]	Zea_mays	28	8.9e-30
TRINITY_DN14821_c1_g7	XP_016679835.1	PREDICTED: ras-related protein RABC2a-like [Gossypium hirsutum]	Gossypium_hirsutum	39.3	8.1e-28
TRINITY_DN14822_c2_g1	PIN14306.1	WD40 protein DMR-N9 [Handroanthus impetiginosus]	Handroanthus_impetiginosus	33.7	1e-21
TRINITY_DN14824_c1_g1	XP_027941644.1	probable protein phosphatase 2C 72 isoform X2 [Vigna unguiculata]	Vigna_unguiculata	35.7	8.7e-11
TRINITY_DN14826_c4_g2	XP_002966098.1	protein YIPF5 homolog [Selaginella moellendorffii]	Selaginella_moellendorffii	39.9	3e-17
TRINITY_DN14826_c6_g1	OAE23728.1	hypothetical protein AXG93_4776s1100 [Marchantia polymorpha subsp. ruderalis]	Marchantia_polymorpha	61.7	1.3e-161
TRINITY_DN14828_c0_g1	PHT96619.1	Ubiquitin thioesterase OTUB1 [Capsicum chinense]	Capsicum_chinense	47.9	8.6e-61
TRINITY_DN1482_c0_g1	XP_010674086.1	PREDICTED: 60S ribosomal protein L19-3 [Beta vulgaris subsp. vulgaris]	Beta_vulgaris	73.3	4e-24
TRINITY_DN14830_c0_g3	XP_023912066.1	checkpoint protein rad17-like [Quercus suber]	Quercus_suber	30.9	3.3e-29
TRINITY_DN14835_c0_g2	XP_016733419.1	PREDICTED: LOW QUALITY PROTEIN: DENN domain-containing protein 4B-like [Gossypium hirsutum]	Gossypium_hirsutum	34.8	8.7e-21
TRINITY_DN14835_c1_g1	GAQ83310.1	tonoplast dicarboxylate transporter [Klebsormidium nitens]	Klebsormidium_nitens	31.9	6.6e-70
TRINITY_DN14838_c0_g1	AAO00863.1	Unknown protein [Arabidopsis thaliana]	Arabidopsis_thaliana	75	4.9e-47
TRINITY_DN14838_c0_g2	AAO00863.1	Unknown protein [Arabidopsis thaliana]	Arabidopsis_thaliana	79.1	7.6e-51
TRINITY_DN14839_c2_g1	XP_005651285.1	hypothetical protein COCSUDRAFT_4914, partial [Coccomyxa subellipsoidea C-169]	Coccomyxa_subellipsoidea	34.3	3.8e-48
TRINITY_DN1483_c0_g1	ABK24358.1	unknown [Picea sitchensis]	Picea_sitchensis	70.8	1.3e-47
TRINITY_DN14840_c2_g1	KXZ41541.1	hypothetical protein GPECTOR_404g240 [Gonium pectorale]	Gonium_pectorale	48.8	1.5e-74
TRINITY_DN14840_c4_g1	XP_024383622.1	zinc finger protein 330 homolog [Physcomitrella patens]	Physcomitrella_patens	63.1	7.2e-50
TRINITY_DN14842_c3_g1	VDC94922.1	unnamed protein product [Brassica oleracea]	Brassica_oleracea	35.1	2.5e-21
TRINITY_DN14843_c0_g2	BAK02396.1	predicted protein [Hordeum vulgare subsp. vulgare]	Hordeum_vulgare	53.8	5.8e-195
TRINITY_DN14846_c0_g1	CAI84893.1	putative Rac GTPase [Medicago sativa subsp. x varia]	Medicago_sativa	48.1	1.4e-41
TRINITY_DN14847_c1_g1	XP_005643522.1	RNA-binding domain-containing protein [Coccomyxa subellipsoidea C-169]	Coccomyxa_subellipsoidea	28.8	1.6e-06
TRINITY_DN14849_c0_g7	GBF94952.1	arsenite methyltransferase [Raphidocelis subcapitata]	Raphidocelis_subcapitata	44.8	2.4e-72
TRINITY_DN14851_c0_g3	XP_017258436.1	PREDICTED: phospholipase A-2-activating protein [Daucus carota subsp. sativus]	Daucus_carota	27.1	2.9e-57
TRINITY_DN14852_c0_g2	XP_023899645.1	sporulation-specific protein 5-like [Quercus suber]	Quercus_suber	32.9	3.5e-24
TRINITY_DN14858_c0_g1	GAQ82577.1	BRCA1-associated RING domain protein 1 [Klebsormidium nitens]	Klebsormidium_nitens	34.1	3.2e-15
TRINITY_DN14863_c0_g1	ABK21941.1	unknown [Picea sitchensis]	Picea_sitchensis	51.6	5.5e-23
TRINITY_DN14863_c1_g1	GAQ78596.1	Rab family GTPase [Klebsormidium nitens]	Klebsormidium_nitens	68.2	7e-66
TRINITY_DN14864_c0_g4	XP_001693615.1	peptidyl-prolyl cis-trans isomerase, FKBP-type [Chlamydomonas reinhardtii]	Chlamydomonas_reinhardtii	71.4	5.8e-37
TRINITY_DN14864_c1_g1	XP_001702430.1	predicted protein, partial [Chlamydomonas reinhardtii]	Chlamydomonas_reinhardtii	35.4	8e-34
TRINITY_DN14869_c1_g1	XP_019457397.1	PREDICTED: autophagy-related protein 16-like [Lupinus angustifolius]	Lupinus_angustifolius	44.9	1.2e-13
TRINITY_DN14869_c2_g2	XP_008457254.1	PREDICTED: vesicle-associated membrane protein 721-like isoform X1 [Cucumis melo]	Cucumis_melo	40	2e-10
TRINITY_DN14871_c5_g2	RMZ56165.1	hypothetical protein APUTEX25_004589 [Auxenochlorella protothecoides]	Auxenochlorella_protothecoides	60.4	2.2e-11
TRINITY_DN14871_c5_g8	OAE26044.1	hypothetical protein AXG93_3437s1020 [Marchantia polymorpha subsp. ruderalis]	Marchantia_polymorpha	44.8	1.1e-10
TRINITY_DN14874_c1_g1	XP_008783619.1	glucuronokinase 1-like isoform X1 [Phoenix dactylifera]	Phoenix_dactylifera	52.8	1.7e-90
TRINITY_DN14878_c2_g1	XP_027353839.1	bifunctional dihydrofolate reductase-thymidylate synthase-like [Abrus precatorius]	Abrus_precatorius	49.6	6e-25
TRINITY_DN14878_c3_g1	XP_009345743.1	PREDICTED: serine carboxypeptidase-like [Pyrus x bretschneideri]	Pyrus_x_bretschneideri	41.9	7.1e-58
TRINITY_DN14878_c3_g2	RWR86045.1	serine carboxypeptidase-like protein [Cinnamomum micranthum f. kanehirae]	Cinnamomum_micranthum	41	3.1e-87
TRINITY_DN14878_c3_g3	RZB83260.1	60S ribosomal protein L5 isoform B [Glycine soja]	Glycine_soja	60.1	8.3e-76
TRINITY_DN14878_c3_g5	KMZ69154.1	putative Serine carboxypeptidase [Zostera marina]	Zostera_marina	41.2	1.4e-59
TRINITY_DN14878_c3_g7	XP_001420044.1	predicted protein [Ostreococcus lucimarinus CCE9901]	Ostreococcus_sp._'lucimarinus'	69.4	1e-63
TRINITY_DN14879_c1_g3	XP_013899619.1	hypothetical protein MNEG_7358, partial [Monoraphidium neglectum]	Monoraphidium_neglectum	28.3	1.2e-31
TRINITY_DN14880_c2_g1	XP_002319439.1	E3 ubiquitin-protein ligase RNFT1 [Populus trichocarpa]	Populus_trichocarpa	34.6	6.5e-40
TRINITY_DN14882_c0_g1	GBG90601.1	hypothetical protein CBR_g50945 [Chara braunii]	Chara_braunii	50	6.5e-65
TRINITY_DN14882_c0_g10	XP_023896217.1	C-1-tetrahydrofolate synthase, cytoplasmic-like [Quercus suber]	Quercus_suber	56.1	9.2e-291
TRINITY_DN14882_c0_g4	VDC79909.1	unnamed protein product [Brassica rapa]	Brassica_rapa	38.4	5.1e-07
TRINITY_DN14883_c0_g1	RHN39971.1	putative small GTPase superfamily, P-loop containing nucleoside triphosphate hydrolase [Medicago truncatula]	Medicago_truncatula	41	9.4e-27
TRINITY_DN14884_c0_g3	XP_027165603.1	probable RNA helicase SDE3 [Coffea eugenioides]	Coffea_eugenioides	34.3	1.7e-57
TRINITY_DN14884_c0_g4	GAQ81960.1	poly(ADP-ribose) polymerase [Klebsormidium nitens]	Klebsormidium_nitens	41.9	1e-36
TRINITY_DN14884_c0_g6	ATB19747.1	putative poly(ADP-ribose) polymerase [Juniperus oxycedrus]	Juniperus_oxycedrus	40.9	1.2e-161
TRINITY_DN14884_c0_g9	XP_004975216.1	nucleotide pyrophosphatase/phosphodiesterase [Setaria italica]	Setaria_italica	38.1	8.9e-18
TRINITY_DN14886_c1_g2	XP_024388449.1	WD repeat-containing protein 11-like isoform X1 [Physcomitrella patens]	Physcomitrella_patens	21.2	3.9e-48
TRINITY_DN14888_c0_g1	KHN28130.1	Putative mitochondrial protein [Glycine soja]	Glycine_soja	45.8	3.8e-10
TRINITY_DN14888_c0_g4	EPS74717.1	hypothetical protein M569_00042, partial [Genlisea aurea]	Genlisea_aurea	53.6	7e-07
TRINITY_DN14890_c0_g1	OAE35059.1	hypothetical protein AXG93_3253s1250 [Marchantia polymorpha subsp. ruderalis]	Marchantia_polymorpha	73	9.5e-295
TRINITY_DN14891_c0_g3	PIA47481.1	hypothetical protein AQUCO_01400257v1 [Aquilegia coerulea]	Aquilegia_coerulea	39.9	3e-41
TRINITY_DN14892_c1_g2	OAE18929.1	hypothetical protein AXG93_1976s1350 [Marchantia polymorpha subsp. ruderalis]	Marchantia_polymorpha	45.6	7.6e-63
TRINITY_DN14895_c0_g2	NP_198760.1	SNF1-related protein kinase 1.3 [Arabidopsis thaliana]	Arabidopsis_thaliana	41.8	6.6e-58
TRINITY_DN14897_c1_g2	XP_023881335.1	mitochondrial carnitine carrier-like [Quercus suber]	Quercus_suber	35.7	6.9e-35
TRINITY_DN14899_c1_g1	XP_023917479.1	ATP-dependent RNA helicase dbp2-like [Quercus suber]	Quercus_suber	63.5	1.7e-137
TRINITY_DN14901_c2_g1	XP_005643012.1	hypothetical protein COCSUDRAFT_34498 [Coccomyxa subellipsoidea C-169]	Coccomyxa_subellipsoidea	34.8	4.5e-11
TRINITY_DN14906_c0_g1	XP_001415408.1	P-ATPase family transporter: sodium/potassium ion [Ostreococcus lucimarinus CCE9901]	Ostreococcus_sp._'lucimarinus'	46.5	1.3e-73
TRINITY_DN14907_c0_g1	XP_011074302.1	E3 ubiquitin-protein ligase ARIH1-like isoform X1 [Sesamum indicum]	Sesamum_indicum	34	8.2e-19
TRINITY_DN14911_c1_g5	XP_021720381.1	1-phosphatidylinositol-3-phosphate 5-kinase FAB1B-like [Chenopodium quinoa]	Chenopodium_quinoa	39.2	3.6e-62
TRINITY_DN14912_c1_g2	XP_024376275.1	exostosin-1-like [Physcomitrella patens]	Physcomitrella_patens	36.6	5.7e-23
TRINITY_DN14912_c1_g3	XP_023905230.1	myosin-1-like [Quercus suber]	Quercus_suber	36.7	2e-38
TRINITY_DN14912_c1_g4	XP_010037566.1	PREDICTED: serine/threonine-protein kinase HT1 [Eucalyptus grandis]	Eucalyptus_grandis	28.8	1.1e-23
TRINITY_DN14912_c1_g5	XP_023905230.1	myosin-1-like [Quercus suber]	Quercus_suber	51.6	5.8e-39
TRINITY_DN14913_c0_g1	ASR73784.1	acyl-CoA oxidase 4 [Camellia sinensis]	Camellia_sinensis	40.7	1.1e-123
TRINITY_DN14914_c0_g1	KXZ51661.1	hypothetical protein GPECTOR_11g114 [Gonium pectorale]	Gonium_pectorale	50	1.4e-45
TRINITY_DN14914_c0_g3	GBF89861.1	eukaryotic elongation factor 2 kinase [Raphidocelis subcapitata]	Raphidocelis_subcapitata	57.7	6.5e-15
TRINITY_DN14917_c3_g3	OAE22515.1	hypothetical protein AXG93_2423s1010 [Marchantia polymorpha subsp. ruderalis]	Marchantia_polymorpha	48.7	3.6e-308
TRINITY_DN14918_c3_g3	XP_023910909.1	protein app1-like [Quercus suber]	Quercus_suber	24.6	2.2e-06
TRINITY_DN14919_c3_g2	XP_023883653.1	DNA repair protein rhp51-like [Quercus suber]	Quercus_suber	76.1	6.6e-136
TRINITY_DN14919_c3_g3	XP_013635065.1	PREDICTED: putative aquaporin NIP4-1 [Brassica oleracea var. oleracea]	Brassica_oleracea	29.8	1.5e-20
TRINITY_DN14919_c3_g4	XP_019428341.1	PREDICTED: probable aquaporin PIP2-4 [Lupinus angustifolius]	Lupinus_angustifolius	30	9.4e-13
TRINITY_DN14919_c3_g5	KMZ62949.1	Aquaporin NIP1-1 [Zostera marina]	Zostera_marina	31.1	1.3e-15
TRINITY_DN14920_c1_g3	XP_023898301.1	dolichyl-phosphate-mannose--protein mannosyltransferase 2-like [Quercus suber]	Quercus_suber	38.5	7.2e-134
TRINITY_DN14922_c0_g2	XP_023758384.1	transmembrane 9 superfamily member 7-like [Lactuca sativa]	Lactuca_sativa	56.2	6.7e-124
TRINITY_DN14923_c1_g2	XP_005644124.1	NAD(P)-binding protein [Coccomyxa subellipsoidea C-169]	Coccomyxa_subellipsoidea	35.9	2.5e-40
TRINITY_DN14925_c0_g1	PNW88768.1	hypothetical protein CHLRE_01g043750v5 [Chlamydomonas reinhardtii]	Chlamydomonas_reinhardtii	34.6	1.1e-113
TRINITY_DN14926_c5_g2	XP_003062449.1	predicted protein, partial [Micromonas pusilla CCMP1545]	Micromonas_pusilla	42.3	8.4e-17
TRINITY_DN14926_c5_g6	XP_019154923.1	PREDICTED: protein RFT1 homolog [Ipomoea nil]	Ipomoea_nil	31.8	1.8e-52
TRINITY_DN14927_c0_g1	XP_002988213.2	protein HGV2 [Selaginella moellendorffii]	Selaginella_moellendorffii	36	2.4e-10
TRINITY_DN14927_c1_g1	EFJ09444.1	hypothetical protein SELMODRAFT_129991, partial [Selaginella moellendorffii]	Selaginella_moellendorffii	48.8	2.6e-39
TRINITY_DN14928_c0_g4	OEL26255.1	2-oxoglutarate dehydrogenase, mitochondrial [Dichanthelium oligosanthes]	Dichanthelium_oligosanthes	41.5	1.6e-191
TRINITY_DN14930_c0_g1	OVA08044.1	Protein kinase domain [Macleaya cordata]	Macleaya_cordata	31.7	9.2e-25
TRINITY_DN14932_c1_g1	GAQ87565.1	syntaxin of plants 61 [Klebsormidium nitens]	Klebsormidium_nitens	24	2.5e-13
TRINITY_DN14932_c1_g3	XP_021969994.1	riboflavin biosynthesis protein PYRR, chloroplastic-like isoform X1 [Helianthus annuus]	Helianthus_annuus	40.9	8.7e-22
TRINITY_DN14932_c1_g4	XP_016734096.1	PREDICTED: uncharacterized protein K02A2.6-like, partial [Gossypium hirsutum]	Gossypium_hirsutum	35.9	1.6e-10
TRINITY_DN14935_c1_g2	XP_001697921.1	predicted protein, partial [Chlamydomonas reinhardtii]	Chlamydomonas_reinhardtii	33.7	8.9e-30
TRINITY_DN14938_c2_g1	XP_023743789.1	uncharacterized protein LOC111891956, partial [Lactuca sativa]	Lactuca_sativa	41.2	4.4e-41
TRINITY_DN14939_c1_g2	GAX72896.1	hypothetical protein CEUSTIGMA_g351.t1 [Chlamydomonas eustigma]	Chlamydomonas_eustigma	23.8	3.3e-20
TRINITY_DN14940_c1_g3	XP_015649277.1	uncharacterized protein LOC107281950 [Oryza sativa Japonica Group]	Oryza_sativa	43.2	1.5e-85
TRINITY_DN14941_c0_g1	GAQ77712.1	hypothetical protein KFL_000020730 [Klebsormidium nitens]	Klebsormidium_nitens	31.6	1.4e-33
TRINITY_DN14945_c1_g2	PTQ32101.1	hypothetical protein MARPO_0103s0068 [Marchantia polymorpha]	Marchantia_polymorpha	51.8	3e-50
TRINITY_DN14947_c0_g6	PSC74923.1	methyltransferase NSUN6 [Micractinium conductrix]	Micractinium_conductrix	36.1	1.2e-63
TRINITY_DN14953_c0_g1	KMS64936.1	hypothetical protein BVRB_041110, partial [Beta vulgaris subsp. vulgaris]	Beta_vulgaris	64.3	1.3e-06
TRINITY_DN14953_c1_g1	EPS70867.1	hypothetical protein M569_03892, partial [Genlisea aurea]	Genlisea_aurea	33.2	1.9e-15
TRINITY_DN14954_c0_g2	XP_021754257.1	serine/threonine-protein phosphatase PP1 isoform X1 [Chenopodium quinoa]	Chenopodium_quinoa	37.4	1.3e-53
TRINITY_DN14954_c0_g8	XP_006607042.1	insulin gene enhancer protein isl-1-like, partial [Glycine max]	Glycine_max	30.9	3.3e-27
TRINITY_DN14955_c1_g1	XP_021659934.1	putative acyl-activating enzyme 19 isoform X1 [Hevea brasiliensis]	Hevea_brasiliensis	28.1	2.3e-37
TRINITY_DN14955_c1_g2	CDY60279.1	BnaA07g36600D [Brassica napus]	Brassica_napus	36.1	4.6e-07
TRINITY_DN14957_c2_g2	XP_013894375.1	hypothetical protein MNEG_12607 [Monoraphidium neglectum]	Monoraphidium_neglectum	49.1	1.1e-50
TRINITY_DN14957_c2_g4	GAQ87754.1	WD40 repeat-containing protein [Klebsormidium nitens]	Klebsormidium_nitens	41.5	1.3e-27
TRINITY_DN14958_c1_g1	XP_023742362.1	replication protein A 70 kDa DNA-binding subunit A-like [Lactuca sativa]	Lactuca_sativa	36.9	1.6e-106
TRINITY_DN14962_c0_g2	XP_024517372.1	uncharacterized protein LOC112341471 isoform X2 [Selaginella moellendorffii]	Selaginella_moellendorffii	28.6	2.7e-32
TRINITY_DN14962_c0_g3	PTQ35727.1	hypothetical protein MARPO_0069s0064 [Marchantia polymorpha]	Marchantia_polymorpha	45.5	9.6e-38
TRINITY_DN14962_c0_g5	PNW72238.1	hypothetical protein CHLRE_16g676350v5 [Chlamydomonas reinhardtii]	Chlamydomonas_reinhardtii	76.1	1.6e-24
TRINITY_DN14962_c0_g8	PNW72238.1	hypothetical protein CHLRE_16g676350v5 [Chlamydomonas reinhardtii]	Chlamydomonas_reinhardtii	78.8	5.2e-07
TRINITY_DN14963_c2_g1	XP_023887669.1	SWI/SNF and RSC complexes subunit ssr2-like [Quercus suber]	Quercus_suber	34.9	7.7e-71
TRINITY_DN14963_c2_g2	KXZ52847.1	hypothetical protein GPECTOR_8g23 [Gonium pectorale]	Gonium_pectorale	49.4	3e-37
TRINITY_DN14966_c5_g3	GBG75870.1	hypothetical protein CBR_g21114 [Chara braunii]	Chara_braunii	57.6	8.9e-19
TRINITY_DN14967_c1_g1	XP_018486844.1	PREDICTED: PHD finger protein ING1-like [Raphanus sativus]	Raphanus_sativus	46	5.8e-12
TRINITY_DN14967_c1_g13	XP_023738339.1	52 kDa repressor of the inhibitor of the protein kinase-like [Lactuca sativa]	Lactuca_sativa	50	3.7e-09
TRINITY_DN14968_c1_g1	XP_023890394.1	uncharacterized protein C3H1.02c-like [Quercus suber]	Quercus_suber	31.1	2.5e-119
TRINITY_DN14968_c1_g2	XP_014491380.1	R3H domain-containing protein 1 [Vigna radiata var. radiata]	Vigna_radiata	27.8	3e-11
TRINITY_DN14971_c0_g2	XP_021761353.1	phosphatidylinositol-3-phosphatase myotubularin-1-like isoform X1 [Chenopodium quinoa]	Chenopodium_quinoa	42	9.1e-27
TRINITY_DN14975_c1_g1	PON32040.1	Splicing factor, SPF [Parasponia andersonii]	Parasponia_andersonii	28.2	6.1e-08
TRINITY_DN14975_c1_g2	GAX77889.1	hypothetical protein CEUSTIGMA_g5331.t1 [Chlamydomonas eustigma]	Chlamydomonas_eustigma	36.2	7.5e-94
TRINITY_DN14976_c3_g2	AIU48660.1	RabGAP/TBC domain-containing protein, partial [Chloranthus japonicus]	Chloranthus_japonicus	37.6	5.2e-47
TRINITY_DN14976_c4_g1	XP_009369095.1	PREDICTED: serine/threonine-protein kinase RUNKEL-like [Pyrus x bretschneideri]	Pyrus_x_bretschneideri	33.2	7.9e-11
TRINITY_DN14979_c0_g1	BAJ97253.1	predicted protein [Hordeum vulgare subsp. vulgare]	Hordeum_vulgare	44.2	1.9e-122
TRINITY_DN14979_c1_g1	XP_007144251.1	hypothetical protein PHAVU_007G140700g [Phaseolus vulgaris]	Phaseolus_vulgaris	24.6	3.7e-13
TRINITY_DN14979_c3_g1	XP_023901491.1	uncharacterized protein LOC112013327 [Quercus suber]	Quercus_suber	32	3.8e-46
TRINITY_DN14984_c1_g2	XP_023905237.1	actin-related protein 2/3 complex subunit 2-like [Quercus suber]	Quercus_suber	50.4	7.9e-52
TRINITY_DN14984_c2_g1	XP_002993625.1	mitochondrial Rho GTPase 1 [Selaginella moellendorffii]	Selaginella_moellendorffii	37.5	3.3e-95
TRINITY_DN14984_c2_g5	XP_019435473.1	PREDICTED: histone H1-III-like [Lupinus angustifolius]	Lupinus_angustifolius	57.1	2e-11
TRINITY_DN14985_c2_g1	XP_010538045.1	PREDICTED: protein disulfide-isomerase 5-4 [Tarenaya hassleriana]	Tarenaya_hassleriana	36.4	1.9e-09
TRINITY_DN14985_c2_g6	XP_002947121.1	hypothetical protein VOLCADRAFT_79533 [Volvox carteri f. nagariensis]	Volvox_carteri	34.7	3.1e-23
TRINITY_DN14986_c1_g3	XP_009351061.1	PREDICTED: negative elongation factor C/D-like [Pyrus x bretschneideri]	Pyrus_x_bretschneideri	39.6	3.2e-105
TRINITY_DN14988_c1_g2	GBF96161.1	hypothetical protein Rsub_08909 [Raphidocelis subcapitata]	Raphidocelis_subcapitata	41.2	7.2e-30
TRINITY_DN14990_c2_g10	XP_005651241.1	RRS1-domain-containing protein [Coccomyxa subellipsoidea C-169]	Coccomyxa_subellipsoidea	41.2	1.2e-11
TRINITY_DN14990_c2_g2	XP_020578559.1	molybdopterin synthase catalytic subunit [Phalaenopsis equestris]	Phalaenopsis_equestris	50.7	2.2e-32
TRINITY_DN14990_c2_g3	XP_003061097.1	predicted protein [Micromonas pusilla CCMP1545]	Micromonas_pusilla	38.6	3.5e-123
TRINITY_DN14991_c0_g1	GAQ88312.1	oligomeric Golgi complex component 3 [Klebsormidium nitens]	Klebsormidium_nitens	34.5	2.4e-122
TRINITY_DN14991_c0_g6	XP_020547125.1	uridine kinase-like protein 5 [Sesamum indicum]	Sesamum_indicum	57.2	4.7e-64
TRINITY_DN14994_c3_g10	PNH05795.1	2,3-bisphosphoglycerate-dependent phosphoglycerate mutase [Tetrabaena socialis]	Tetrabaena_socialis	44.6	2.1e-18
TRINITY_DN14994_c3_g6	XP_011089315.1	probable pyridoxal 5'-phosphate synthase subunit PDX2 [Sesamum indicum]	Sesamum_indicum	37.5	1.3e-14
TRINITY_DN14996_c0_g1	XP_005644180.1	WD40 repeat-like protein [Coccomyxa subellipsoidea C-169]	Coccomyxa_subellipsoidea	31.9	1.7e-51
TRINITY_DN15000_c2_g3	GAQ88055.1	putative WD-40 repeat family protein [Klebsormidium nitens]	Klebsormidium_nitens	64.6	1.1e-10
TRINITY_DN15005_c1_g4	XP_021894946.1	gamma-glutamyltranspeptidase 3-like isoform X1 [Carica papaya]	Carica_papaya	42.6	3.8e-45
TRINITY_DN15005_c1_g7	XP_022153192.1	tRNA wybutosine-synthesizing protein 4 [Momordica charantia]	Momordica_charantia	43.9	4e-63
TRINITY_DN15008_c2_g1	BAK01753.1	predicted protein [Hordeum vulgare subsp. vulgare]	Hordeum_vulgare	37.3	1.7e-38
TRINITY_DN15014_c0_g1	YP_009532855.1	hypothetical protein (mitochondrion) [Glycine soja]	Glycine_soja	70	7.9e-27
TRINITY_DN15016_c0_g1	XP_024525940.1	hippocampus abundant transcript 1 protein isoform X2 [Selaginella moellendorffii]	Selaginella_moellendorffii	30.5	2.8e-12
TRINITY_DN15016_c1_g2	XP_010271801.1	PREDICTED: U5 small nuclear ribonucleoprotein 40 kDa protein [Nelumbo nucifera]	Nelumbo_nucifera	60.2	4.6e-66
TRINITY_DN15016_c1_g5	GAQ83917.1	aldehyde dehydrogenase [Klebsormidium nitens]	Klebsormidium_nitens	51.1	7.5e-153
TRINITY_DN15017_c0_g2	PWA76065.1	hypothetical protein CTI12_AA147310 [Artemisia annua]	Artemisia_annua	20	1e-07
TRINITY_DN15019_c1_g1	GAQ92105.1	Predicted E3 ubiquitin ligase [Klebsormidium nitens]	Klebsormidium_nitens	39.9	3.8e-125
TRINITY_DN15020_c1_g2	XP_023915349.1	aquaporin-3-like [Quercus suber]	Quercus_suber	37.2	1.2e-30
TRINITY_DN15020_c1_g3	XP_023917926.1	autophagy-related protein 18-like, partial [Quercus suber]	Quercus_suber	37.6	2.2e-44
TRINITY_DN15021_c0_g1	PRW56727.1	SAGA-associated factor 11 [Chlorella sorokiniana]	Chlorella_sorokiniana	34.8	2.6e-09
TRINITY_DN15023_c0_g3	GBG84704.1	hypothetical protein CBR_g39080 [Chara braunii]	Chara_braunii	31	1e-54
TRINITY_DN15028_c0_g1	AFK36347.1	unknown [Lotus japonicus]	Lotus_japonicus	60.3	1.4e-21
TRINITY_DN15028_c0_g4	KDD72142.1	protein kinase, partial [Helicosporidium sp. ATCC 50920]	Helicosporidium_sp._ATCC_50920	47.6	8.8e-66
TRINITY_DN15028_c0_g5	OAY71815.1	Ankyrin-3, partial [Ananas comosus]	Ananas_comosus	24.9	1.3e-11
TRINITY_DN15029_c1_g9	CDM85313.1	unnamed protein product [Triticum aestivum]	Triticum_aestivum	51.6	2.9e-33
TRINITY_DN15030_c2_g2	XP_022838286.1	Serine/threonine-protein kinase, active site [Ostreococcus tauri]	Ostreococcus_tauri	52.4	1.9e-53
TRINITY_DN15030_c2_g3	XP_002876134.1	ATP synthase subunit d, mitochondrial [Arabidopsis lyrata subsp. lyrata]	Arabidopsis_lyrata	34.8	6.6e-13
TRINITY_DN15030_c3_g1	RWR90154.1	vacuolar protein sorting-associated protein 28 2 [Cinnamomum micranthum f. kanehirae]	Cinnamomum_micranthum	39.6	2.4e-36
TRINITY_DN15030_c3_g2	XP_012845335.1	PREDICTED: cyclin-dependent kinase C-1 [Erythranthe guttata]	Erythranthe_guttata	41.4	2.8e-17
TRINITY_DN15030_c3_g4	XP_015688146.1	PREDICTED: AMSH-like ubiquitin thioesterase 3 isoform X2 [Oryza brachyantha]	Oryza_brachyantha	47.9	1.8e-41
TRINITY_DN15031_c3_g1	KMS64936.1	hypothetical protein BVRB_041110, partial [Beta vulgaris subsp. vulgaris]	Beta_vulgaris	69.5	8.8e-54
TRINITY_DN15033_c2_g1	XP_024391969.1	uncharacterized protein LOC112290177 isoform X3 [Physcomitrella patens]	Physcomitrella_patens	28.9	8.9e-28
TRINITY_DN15035_c1_g1	KZM80109.1	hypothetical protein DCAR_000304 [Daucus carota subsp. sativus]	Daucus_carota	38.1	2.8e-12
TRINITY_DN15035_c1_g7	KYP70195.1	Extended synaptotagmin-3 [Cajanus cajan]	Cajanus_cajan	44.9	1.7e-14
TRINITY_DN15036_c0_g2	OAY49811.1	hypothetical protein MANES_05G085300 [Manihot esculenta]	Manihot_esculenta	35.2	4.2e-06
TRINITY_DN15039_c1_g8	XP_005643889.1	NAD(P) dependent steroid dehydrogenase-like protein [Coccomyxa subellipsoidea C-169]	Coccomyxa_subellipsoidea	48.7	8.1e-84
TRINITY_DN15041_c1_g2	GAQ86389.1	hypothetical protein KFL_002860130 [Klebsormidium nitens]	Klebsormidium_nitens	30.4	4.2e-10
TRINITY_DN15041_c1_g4	ABC94893.1	polyprotein [Oryza australiensis]	Oryza_australiensis	37.2	2.8e-105
TRINITY_DN15041_c1_g5	XP_014524533.1	uncharacterized protein LOC106780735 [Vigna radiata var. radiata]	Vigna_radiata	41.1	6e-18
TRINITY_DN15042_c0_g2	GAX77941.1	hypothetical protein CEUSTIGMA_g5383.t1 [Chlamydomonas eustigma]	Chlamydomonas_eustigma	35.9	6.3e-16
TRINITY_DN15044_c0_g1	XP_026665092.1	uncharacterized vacuolar membrane protein YML018C [Phoenix dactylifera]	Phoenix_dactylifera	33.9	1.5e-06
TRINITY_DN15044_c0_g4	XP_022849716.1	transportin-1 isoform X4 [Olea europaea var. sylvestris]	Olea_europaea	45.8	6.3e-221
TRINITY_DN15044_c0_g5	GAQ81425.1	protein with JUMONJI domain [Klebsormidium nitens]	Klebsormidium_nitens	49.7	8.6e-88
TRINITY_DN15045_c3_g1	GAQ90948.1	Polycomb enhancer protein [Klebsormidium nitens]	Klebsormidium_nitens	30.4	2.3e-16
TRINITY_DN15045_c3_g4	RWR90358.1	Hus1-like protein [Cinnamomum micranthum f. kanehirae]	Cinnamomum_micranthum	30	6.5e-08
TRINITY_DN15048_c3_g2	GAQ80193.1	serine/threonine protein kinase [Klebsormidium nitens]	Klebsormidium_nitens	45.1	4.9e-64
TRINITY_DN15050_c3_g1	GBG71621.1	hypothetical protein CBR_g9037 [Chara braunii]	Chara_braunii	57.1	1e-233
TRINITY_DN15050_c3_g2	XP_020574713.1	ubiquitin carboxyl-terminal hydrolase 2 [Phalaenopsis equestris]	Phalaenopsis_equestris	41.3	2.3e-74
TRINITY_DN15051_c3_g3	XP_012456994.1	PREDICTED: DNA-binding protein DDB_G0278111 isoform X1 [Gossypium raimondii]	Gossypium_raimondii	53.3	1.2e-10
TRINITY_DN15053_c2_g1	XP_023925582.1	mitogen-activated protein kinase Hog1 [Quercus suber]	Quercus_suber	50.6	1.1e-94
TRINITY_DN15054_c0_g3	XP_020882006.1	serine/threonine-protein kinase STY17 [Arabidopsis lyrata subsp. lyrata]	Arabidopsis_lyrata	31.4	3e-29
TRINITY_DN15055_c1_g1	XP_002954721.1	hypothetical protein VOLCADRAFT_65200 [Volvox carteri f. nagariensis]	Volvox_carteri	43.3	1.1e-08
TRINITY_DN15055_c1_g2	XP_022140889.1	serine/threonine-protein kinase STY8-like isoform X1 [Momordica charantia]	Momordica_charantia	33.6	3.4e-30
TRINITY_DN15055_c1_g5	PSC69656.1	kinase [Micractinium conductrix]	Micractinium_conductrix	31.8	8e-10
TRINITY_DN15055_c2_g1	GAQ83830.1	hypothetical protein KFL_001640050 [Klebsormidium nitens]	Klebsormidium_nitens	27.8	2.9e-35
TRINITY_DN15060_c0_g1	BAK00506.1	predicted protein [Hordeum vulgare subsp. vulgare]	Hordeum_vulgare	34.3	2.2e-31
TRINITY_DN15060_c0_g3	BAK00506.1	predicted protein [Hordeum vulgare subsp. vulgare]	Hordeum_vulgare	35.4	1.5e-45
TRINITY_DN15060_c0_g5	PSR92686.1	TVP38/TMEM64 family membrane protein like [Actinidia chinensis var. chinensis]	Actinidia_chinensis	26.5	1.5e-06
TRINITY_DN15060_c1_g3	BAK00506.1	predicted protein [Hordeum vulgare subsp. vulgare]	Hordeum_vulgare	37.9	1.1e-18
TRINITY_DN15061_c0_g4	XP_001693708.1	predicted protein, partial [Chlamydomonas reinhardtii]	Chlamydomonas_reinhardtii	65.8	3.1e-36
TRINITY_DN15064_c2_g2	XP_002503084.1	predicted protein [Micromonas commoda]	Micromonas_commoda	69.6	6.3e-21
TRINITY_DN15066_c1_g3	XP_023907877.1	ras-like protein [Quercus suber]	Quercus_suber	56.7	2.7e-29
TRINITY_DN15066_c1_g7	GAX79090.1	hypothetical protein CEUSTIGMA_g6530.t1 [Chlamydomonas eustigma]	Chlamydomonas_eustigma	30.1	2e-16
TRINITY_DN15066_c1_g9	XP_006851709.1	serine/threonine-protein kinase CTR1 isoform X1 [Amborella trichopoda]	Amborella_trichopoda	31.2	4e-22
TRINITY_DN15069_c0_g1	PNY15350.1	protein phosphatase methylesterase 1-like [Trifolium pratense]	Trifolium_pratense	62.2	9.2e-20
TRINITY_DN15069_c1_g1	BAF24558.1	Os09g0240500, partial [Oryza sativa Japonica Group]	Oryza_sativa	30.8	2.4e-51
TRINITY_DN15073_c2_g1	XP_023886639.1	ras-related protein Rap-1-like [Quercus suber]	Quercus_suber	54	2.9e-42
TRINITY_DN15073_c3_g7	KZV17828.1	ADP-ribosylation factor-like protein 5 [Dorcoceras hygrometricum]	Dorcoceras_hygrometricum	64	4.8e-60
TRINITY_DN15075_c0_g1	XP_006354613.1	PREDICTED: eukaryotic translation initiation factor 3 subunit B [Solanum tuberosum]	Solanum_tuberosum	41.1	5.2e-132
TRINITY_DN15075_c0_g3	XP_022953044.1	ankyrin-1 [Cucurbita moschata]	Cucurbita_moschata	25	2.6e-08
TRINITY_DN15076_c1_g2	NP_001132707.1	uncharacterized LOC100194190 [Zea mays]	Zea_mays	30.3	9.8e-06
TRINITY_DN15077_c3_g6	PHT52732.1	Brefeldin A-inhibited guanine nucleotide-exchange protein 5 [Capsicum baccatum]	Capsicum_baccatum	36.6	3.9e-18
TRINITY_DN15079_c4_g3	GBG89864.1	hypothetical protein CBR_g49712 [Chara braunii]	Chara_braunii	72.9	7.8e-44
TRINITY_DN15079_c4_g4	OAE19212.1	hypothetical protein AXG93_4751s1170 [Marchantia polymorpha subsp. ruderalis]	Marchantia_polymorpha	25.9	3.8e-13
TRINITY_DN15079_c4_g7	BAJ91724.1	predicted protein [Hordeum vulgare subsp. vulgare]	Hordeum_vulgare	59.7	1.2e-87
TRINITY_DN15081_c0_g1	XP_015647445.1	SUMO-activating enzyme subunit 2 isoform X1 [Oryza sativa Japonica Group]	Oryza_sativa	38.2	5.2e-63
TRINITY_DN15081_c1_g4	PHT96396.1	Cysteine-rich protein 2 [Capsicum chinense]	Capsicum_chinense	65.7	5.1e-06
TRINITY_DN15084_c1_g7	XP_010932264.1	PREDICTED: 28 kDa ribonucleoprotein, chloroplastic-like [Elaeis guineensis]	Elaeis_guineensis	33.7	2.2e-07
TRINITY_DN15087_c0_g1	ACU23248.1	unknown [Glycine max]	Glycine_max	41.1	6.2e-08
TRINITY_DN15089_c0_g1	GBG65035.1	hypothetical protein CBR_g49105 [Chara braunii]	Chara_braunii	26.3	2.7e-11
TRINITY_DN15092_c0_g1	XP_026441985.1	uncharacterized protein K02A2.6-like, partial [Papaver somniferum]	Papaver_somniferum	46	1.8e-19
TRINITY_DN15093_c2_g1	XP_023889329.1	uncharacterized protein LOC112001395 [Quercus suber]	Quercus_suber	34.7	1.4e-43
TRINITY_DN15095_c1_g7	XP_018850609.1	PREDICTED: splicing factor 3A subunit 2 [Juglans regia]	Juglans_regia	65.3	1.1e-76
TRINITY_DN15095_c1_g8	XP_005649715.1	hypothetical protein COCSUDRAFT_65132 [Coccomyxa subellipsoidea C-169]	Coccomyxa_subellipsoidea	36.8	2.9e-50
TRINITY_DN15097_c0_g1	XP_005643702.1	WD40 repeat-like protein [Coccomyxa subellipsoidea C-169]	Coccomyxa_subellipsoidea	36.8	2e-62
TRINITY_DN15098_c0_g1	XP_027066651.1	meiotic nuclear division protein 1 homolog [Coffea arabica]	Coffea_arabica	38.4	6.7e-29
TRINITY_DN15098_c0_g6	XP_004234130.1	protein GID8 homolog [Solanum lycopersicum]	Solanum_lycopersicum	43.1	1.1e-46
TRINITY_DN15099_c0_g2	XP_006645601.1	PREDICTED: ectonucleotide pyrophosphatase/phosphodiesterase family member 3-like, partial [Oryza brachyantha]	Oryza_brachyantha	44.9	1.8e-46
TRINITY_DN15102_c1_g1	XP_009351222.1	PREDICTED: cell division control protein 3-like [Pyrus x bretschneideri]	Pyrus_x_bretschneideri	45.1	7.9e-80
TRINITY_DN15102_c1_g5	XP_024398035.1	ubiquitin-fold modifier-conjugating enzyme 1-like [Physcomitrella patens]	Physcomitrella_patens	69.8	1.2e-69
TRINITY_DN15103_c0_g1	XP_003063733.1	predicted protein, partial [Micromonas pusilla CCMP1545]	Micromonas_pusilla	30.2	3.5e-42
TRINITY_DN15104_c0_g3	KFK33385.1	hypothetical protein AALP_AA5G006200 [Arabis alpina]	Arabis_alpina	29.2	1.5e-13
TRINITY_DN15105_c1_g4	XP_023929170.1	ras-related C3 botulinum toxin substrate 1-like isoform X2 [Quercus suber]	Quercus_suber	39.4	1.9e-22
TRINITY_DN15106_c2_g3	XP_010098059.1	mitochondrial arginine transporter BAC2 [Morus notabilis]	Morus_notabilis	39.3	2.1e-37
TRINITY_DN15106_c2_g4	XP_010532808.1	PREDICTED: inosine triphosphate pyrophosphatase [Tarenaya hassleriana]	Tarenaya_hassleriana	64.3	7.3e-64
TRINITY_DN15109_c4_g3	BAJ98849.1	predicted protein [Hordeum vulgare subsp. vulgare]	Hordeum_vulgare	51.6	1.5e-99
TRINITY_DN15110_c3_g1	XP_010266846.1	PREDICTED: SKP1-like protein 1B [Nelumbo nucifera]	Nelumbo_nucifera	53	4.2e-12
TRINITY_DN15110_c3_g4	XP_010532893.1	PREDICTED: SKP1-like protein 14 [Tarenaya hassleriana]	Tarenaya_hassleriana	47.1	9.1e-07
TRINITY_DN15113_c0_g4	GAQ87706.1	hypothetical protein KFL_003710120 [Klebsormidium nitens]	Klebsormidium_nitens	28.7	7.9e-26
TRINITY_DN15114_c0_g1	GAQ81698.1	NADH dehydrogenase (ubiquinone) 1 alpha subcomplex 2 [Klebsormidium nitens]	Klebsormidium_nitens	65.1	1.4e-17
TRINITY_DN15114_c1_g2	GAQ86355.1	GTPase-activating protein [Klebsormidium nitens]	Klebsormidium_nitens	50.4	2.6e-75
TRINITY_DN15115_c1_g2	CAH65861.1	OSIGBa0126J24.6 [Oryza sativa]	Oryza_sativa	30.4	4.4e-43
TRINITY_DN15116_c1_g4	XP_023880051.1	probable cation-transporting ATPase C1672.11c [Quercus suber]	Quercus_suber	48.9	4.2e-37
TRINITY_DN15116_c1_g5	XP_023889181.1	probable cation-transporting ATPase C1672.11c [Quercus suber]	Quercus_suber	50	2.7e-15
TRINITY_DN15117_c2_g1	OAE30121.1	hypothetical protein AXG93_1112s1390 [Marchantia polymorpha subsp. ruderalis]	Marchantia_polymorpha	40.5	1.3e-105
TRINITY_DN15117_c2_g2	AFK47866.1	unknown [Medicago truncatula]	Medicago_truncatula	38	1.5e-29
TRINITY_DN15117_c2_g4	XP_012839979.1	PREDICTED: hydroxyacylglutathione hydrolase cytoplasmic [Erythranthe guttata]	Erythranthe_guttata	54.9	2.4e-75
TRINITY_DN15117_c2_g5	XP_014524537.1	uncharacterized protein K02A2.6-like, partial [Vigna radiata var. radiata]	Vigna_radiata	31.1	2.4e-118
TRINITY_DN15119_c0_g12	XP_024362519.1	pre-mRNA-splicing factor ATP-dependent RNA helicase DEAH7-like [Physcomitrella patens]	Physcomitrella_patens	52.9	1.2e-35
TRINITY_DN15119_c0_g2	GBG65277.1	hypothetical protein CBR_g50319 [Chara braunii]	Chara_braunii	63.9	1.9e-299
TRINITY_DN15119_c0_g3	XP_002502151.1	ras-related gtp-binding protein [Micromonas commoda]	Micromonas_commoda	50	3.1e-16
TRINITY_DN15120_c2_g3	GBF94271.1	alpha-(1,6)-fucosyltransferase [Raphidocelis subcapitata]	Raphidocelis_subcapitata	36.6	4.7e-49
TRINITY_DN15122_c1_g1	XP_023871810.1	protein kinase wis1-like [Quercus suber]	Quercus_suber	38.5	8.6e-44
TRINITY_DN15125_c0_g1	XP_006390636.1	developmentally-regulated G-protein 2 [Eutrema salsugineum]	Eutrema_salsugineum	66.2	9.3e-136
TRINITY_DN15125_c0_g2	GAX78473.1	hypothetical protein CEUSTIGMA_g5912.t1 [Chlamydomonas eustigma]	Chlamydomonas_eustigma	32	2.2e-17
TRINITY_DN15127_c0_g1	GBG71635.1	hypothetical protein CBR_g9051 [Chara braunii]	Chara_braunii	58.9	5.7e-29
TRINITY_DN15127_c0_g2	XP_009410407.1	PREDICTED: dual specificity protein phosphatase 1B-like isoform X1 [Musa acuminata subsp. malaccensis]	Musa_acuminata	40.3	1.4e-20
TRINITY_DN15127_c0_g4	XP_023876660.1	1-phosphatidylinositol 4,5-bisphosphate phosphodiesterase 1-like [Quercus suber]	Quercus_suber	34.5	1.8e-35
TRINITY_DN15127_c0_g7	XP_002967079.1	sideroflexin-5 [Selaginella moellendorffii]	Selaginella_moellendorffii	35.3	3.8e-30
TRINITY_DN15128_c0_g2	XP_005851384.1	hypothetical protein CHLNCDRAFT_18894 [Chlorella variabilis]	Chlorella_variabilis	37.1	1e-23
TRINITY_DN15129_c1_g1	RLN22327.1	uncharacterized protein C2845_PM07G23130 [Panicum miliaceum]	Panicum_miliaceum	42.6	2.1e-40
TRINITY_DN15129_c2_g1	XP_005646894.1	Presenilin-domain-containing protein, partial [Coccomyxa subellipsoidea C-169]	Coccomyxa_subellipsoidea	33.1	2.2e-34
TRINITY_DN15129_c3_g1	ABK24854.1	unknown [Picea sitchensis]	Picea_sitchensis	36	4.7e-28
TRINITY_DN15130_c0_g1	OAE27369.1	hypothetical protein AXG93_2407s1040 [Marchantia polymorpha subsp. ruderalis]	Marchantia_polymorpha	53	2.9e-48
TRINITY_DN15130_c0_g2	KYP75856.1	Arginyl-tRNA--protein transferase 1 [Cajanus cajan]	Cajanus_cajan	60.5	1.6e-22
TRINITY_DN15133_c0_g5	PNY04685.1	myosin-H heavy chain-like protein [Trifolium pratense]	Trifolium_pratense	35.7	8.6e-26
TRINITY_DN15134_c1_g1	ACF78924.1	unknown [Zea mays]	Zea_mays	33.2	3.4e-33
TRINITY_DN15134_c1_g3	XP_005852253.1	hypothetical protein CHLNCDRAFT_33679 [Chlorella variabilis]	Chlorella_variabilis	47.6	1.9e-07
TRINITY_DN15136_c1_g5	XP_002958141.1	hypothetical protein VOLCADRAFT_99352 [Volvox carteri f. nagariensis]	Volvox_carteri	52.1	1.2e-08
TRINITY_DN15138_c1_g1	XP_023878673.1	calcium-binding mitochondrial carrier protein Aralar2-like [Quercus suber]	Quercus_suber	45.9	4.1e-103
TRINITY_DN15138_c1_g3	PNH12804.1	Protein-tyrosine-phosphatase PTP1 [Tetrabaena socialis]	Tetrabaena_socialis	34.1	3e-37
TRINITY_DN15140_c0_g1	GAQ81301.1	Carbon-nitrogen hydrolase [Klebsormidium nitens]	Klebsormidium_nitens	61.7	2.3e-139
TRINITY_DN15141_c0_g3	XP_023883097.1	DNA replication licensing factor mcm6-like [Quercus suber]	Quercus_suber	49.3	1.8e-100
TRINITY_DN15141_c1_g1	XP_023883630.1	probable assembly chaperone of rpl4 [Quercus suber]	Quercus_suber	30.1	2.2e-18
TRINITY_DN15141_c1_g2	GBF92334.1	hypothetical protein Rsub_05536 [Raphidocelis subcapitata]	Raphidocelis_subcapitata	42.9	2.8e-14
TRINITY_DN15145_c0_g1	XP_024369807.1	protein-tyrosine-phosphatase PTP1-like [Physcomitrella patens]	Physcomitrella_patens	33.2	2.3e-31
TRINITY_DN15147_c3_g1	GBG61408.1	hypothetical protein CBR_g20439 [Chara braunii]	Chara_braunii	20.4	2.8e-09
TRINITY_DN15147_c3_g3	XP_024530582.1	UPF0528 protein [Selaginella moellendorffii]	Selaginella_moellendorffii	34.3	1.6e-23
TRINITY_DN15149_c0_g1	XP_006394622.1	calcium-dependent protein kinase 12 [Eutrema salsugineum]	Eutrema_salsugineum	30.2	1.9e-42
TRINITY_DN15153_c5_g3	AAF43440.1	unconventional myosin XI [Vallisneria natans]	Vallisneria_natans	43.2	4.5e-104
TRINITY_DN15158_c4_g1	EPS74023.1	hypothetical protein M569_00723, partial [Genlisea aurea]	Genlisea_aurea	29.3	7.4e-19
TRINITY_DN15159_c0_g4	XP_020889365.1	1-phosphatidylinositol-3-phosphate 5-kinase FAB1B [Arabidopsis lyrata subsp. lyrata]	Arabidopsis_lyrata	25.1	1.8e-19
TRINITY_DN15159_c0_g5	XP_002947121.1	hypothetical protein VOLCADRAFT_79533 [Volvox carteri f. nagariensis]	Volvox_carteri	25.5	9.4e-14
TRINITY_DN15161_c1_g3	RWR86717.1	putative enoyl-CoA hydratase 2, mitochondrial [Cinnamomum micranthum f. kanehirae]	Cinnamomum_micranthum	34.7	3.1e-25
TRINITY_DN15161_c1_g5	GAQ78270.1	nuclear pore complex protein Nup85 [Klebsormidium nitens]	Klebsormidium_nitens	27.4	4.5e-34
TRINITY_DN15162_c0_g1	XP_005846189.1	hypothetical protein CHLNCDRAFT_6829, partial [Chlorella variabilis]	Chlorella_variabilis	41.7	3.2e-48
TRINITY_DN15162_c0_g2	XP_002958906.1	hypothetical protein VOLCADRAFT_100225 [Volvox carteri f. nagariensis]	Volvox_carteri	46.3	6.4e-16
TRINITY_DN15163_c0_g1	GBG85998.1	hypothetical protein CBR_g40811 [Chara braunii]	Chara_braunii	36.3	7.7e-37
TRINITY_DN15166_c2_g1	XP_023880049.1	alpha-actinin-like protein 1 [Quercus suber]	Quercus_suber	39.7	1.9e-51
TRINITY_DN15166_c2_g3	XP_023880049.1	alpha-actinin-like protein 1 [Quercus suber]	Quercus_suber	61.5	9.2e-10
TRINITY_DN15167_c0_g5	XP_012472644.1	PREDICTED: copper transporter 6-like [Gossypium raimondii]	Gossypium_raimondii	35	6.4e-10
TRINITY_DN15167_c0_g6	KMZ67410.1	Copper transporter 5 [Zostera marina]	Zostera_marina	36	1.1e-09
TRINITY_DN15168_c2_g2	XP_019432376.1	PREDICTED: polyadenylate-binding protein-interacting protein 9-like [Lupinus angustifolius]	Lupinus_angustifolius	42	1.5e-12
TRINITY_DN15168_c2_g6	BAJ93836.1	predicted protein [Hordeum vulgare subsp. vulgare]	Hordeum_vulgare	32.8	1.2e-13
TRINITY_DN15169_c2_g3	OAE31603.1	hypothetical protein AXG93_2294s1190 [Marchantia polymorpha subsp. ruderalis]	Marchantia_polymorpha	48.4	1.4e-83
TRINITY_DN15171_c2_g3	XP_001691863.1	small rab-related GTPase [Chlamydomonas reinhardtii]	Chlamydomonas_reinhardtii	33.2	5.6e-27
TRINITY_DN15171_c3_g3	PRW05810.1	Transcription factor IIIB 90 kDa subunit [Chlorella sorokiniana]	Chlorella_sorokiniana	42.9	1e-45
TRINITY_DN15174_c0_g2	GAX78270.1	hypothetical protein CEUSTIGMA_g5712.t1 [Chlamydomonas eustigma]	Chlamydomonas_eustigma	27.3	1.3e-18
TRINITY_DN15175_c0_g2	PIA59678.1	hypothetical protein AQUCO_00400519v1 [Aquilegia coerulea]	Aquilegia_coerulea	34	7e-154
TRINITY_DN15178_c0_g3	ACF87913.1	unknown [Zea mays]	Zea_mays	54.5	1.2e-86
TRINITY_DN15178_c0_g6	XP_019175391.1	PREDICTED: serine/threonine-protein kinase rio2 [Ipomoea nil]	Ipomoea_nil	55.3	2.1e-103
TRINITY_DN15179_c0_g1	XP_001420373.1	predicted protein, partial [Ostreococcus lucimarinus CCE9901]	Ostreococcus_sp._'lucimarinus'	32.7	4.9e-14
TRINITY_DN15179_c0_g2	XP_005651056.1	O-phosphoseryl-tRNA selenium transferase [Coccomyxa subellipsoidea C-169]	Coccomyxa_subellipsoidea	47.4	7.8e-122
TRINITY_DN15180_c0_g4	PSC67455.1	Qa-SYP3 Sed5p Syntaxin 5-type isoform B [Micractinium conductrix]	Micractinium_conductrix	35.2	5.3e-09
TRINITY_DN15182_c1_g1	XP_021748831.1	protein SDE2 homolog [Chenopodium quinoa]	Chenopodium_quinoa	32	1.9e-14
TRINITY_DN15182_c1_g4	XP_005844336.1	hypothetical protein CHLNCDRAFT_58922 [Chlorella variabilis]	Chlorella_variabilis	52.4	1.4e-12
TRINITY_DN15183_c1_g1	RVW77684.1	Transposon Ty3-I Gag-Pol polyprotein [Vitis vinifera]	Vitis_vinifera	27.6	3.1e-08
TRINITY_DN15185_c0_g3	XP_021724139.1	villin-3-like [Chenopodium quinoa]	Chenopodium_quinoa	51.1	3.6e-28
TRINITY_DN15186_c0_g1	PNW81258.1	hypothetical protein CHLRE_07g348650v5 [Chlamydomonas reinhardtii]	Chlamydomonas_reinhardtii	51.5	2.9e-39
TRINITY_DN15188_c0_g1	XP_010540022.1	PREDICTED: ras-related protein RABA6a-like [Tarenaya hassleriana]	Tarenaya_hassleriana	30.7	6.9e-07
TRINITY_DN15188_c1_g1	XP_025641817.1	squamous cell carcinoma antigen recognized by T-cells 3-like [Arachis hypogaea]	Arachis_hypogaea	33.9	2.5e-70
TRINITY_DN15190_c0_g5	XP_017233056.1	PREDICTED: trafficking protein particle complex subunit 6B-like [Daucus carota subsp. sativus]	Daucus_carota	48.6	7e-18
TRINITY_DN15190_c0_g8	XP_016741805.1	PREDICTED: probable trehalase [Gossypium hirsutum]	Gossypium_hirsutum	41.2	2.9e-102
TRINITY_DN15194_c0_g1	XP_001690772.1	NimA-related protein kinase 7 [Chlamydomonas reinhardtii]	Chlamydomonas_reinhardtii	58.3	6.7e-28
TRINITY_DN15195_c3_g3	XP_019172290.1	PREDICTED: transcription initiation factor TFIID subunit 14b-like isoform X1 [Ipomoea nil]	Ipomoea_nil	33.8	1.2e-16
TRINITY_DN15195_c4_g5	XP_023889256.1	forkhead protein sep1-like [Quercus suber]	Quercus_suber	58.7	1.1e-22
TRINITY_DN15196_c1_g1	GBG68607.1	hypothetical protein CBR_g3148, partial [Chara braunii]	Chara_braunii	40.7	1.2e-37
TRINITY_DN15198_c0_g3	XP_002957684.1	hypothetical protein VOLCADRAFT_68493 [Volvox carteri f. nagariensis]	Volvox_carteri	29.7	6.4e-18
TRINITY_DN15200_c1_g2	XP_001698112.1	serine/threonine dehydratase [Chlamydomonas reinhardtii]	Chlamydomonas_reinhardtii	51.2	5.1e-64
TRINITY_DN15201_c0_g1	XP_024382619.1	nuclear pore complex protein NUP155-like [Physcomitrella patens]	Physcomitrella_patens	26.1	2.2e-91
TRINITY_DN15202_c5_g1	GAQ81454.1	hypothetical protein KFL_000800315 [Klebsormidium nitens]	Klebsormidium_nitens	44.6	2.1e-55
TRINITY_DN15202_c5_g2	GAX75422.1	hypothetical protein CEUSTIGMA_g2866.t1 [Chlamydomonas eustigma]	Chlamydomonas_eustigma	55.7	9e-35
TRINITY_DN15202_c5_g7	AFK35746.1	unknown [Lotus japonicus]	Lotus_japonicus	76.7	1.5e-31
TRINITY_DN15202_c5_g8	GAX77947.1	hypothetical protein CEUSTIGMA_g5389.t1 [Chlamydomonas eustigma]	Chlamydomonas_eustigma	49.2	1e-29
TRINITY_DN15203_c0_g1	XP_023880078.1	metal resistance protein YCF1-like [Quercus suber]	Quercus_suber	33.2	9.9e-72
TRINITY_DN15205_c1_g12	XP_023748283.1	uncharacterized protein LOC111896545, partial [Lactuca sativa]	Lactuca_sativa	31.3	7.3e-18
TRINITY_DN15205_c1_g14	XP_023763289.1	uncharacterized protein K02A2.6-like, partial [Lactuca sativa]	Lactuca_sativa	41.7	3.1e-104
TRINITY_DN15205_c1_g5	XP_023763289.1	uncharacterized protein K02A2.6-like, partial [Lactuca sativa]	Lactuca_sativa	45.9	3.5e-55
TRINITY_DN15206_c6_g1	GBF88318.1	transmembrane protein [Raphidocelis subcapitata]	Raphidocelis_subcapitata	45.1	1.7e-12
TRINITY_DN15208_c0_g4	BAK03232.1	predicted protein [Hordeum vulgare subsp. vulgare]	Hordeum_vulgare	36.7	2.2e-26
TRINITY_DN15209_c1_g3	XP_013896617.1	putative Diphthamide biosynthesis protein 1 [Monoraphidium neglectum]	Monoraphidium_neglectum	70.2	2.4e-47
TRINITY_DN15213_c0_g1	XP_023897575.1	uncharacterized protein LOC112009472 [Quercus suber]	Quercus_suber	36.4	1.6e-09
TRINITY_DN15213_c0_g3	PRW57496.1	helicase and polymerase-containing TEBICHI [Chlorella sorokiniana]	Chlorella_sorokiniana	58.5	1.1e-07
TRINITY_DN15215_c4_g1	XP_018456780.1	PREDICTED: DNA damage-binding protein 1a [Raphanus sativus]	Raphanus_sativus	45.5	3.9e-283
TRINITY_DN15215_c5_g1	XP_005850257.1	hypothetical protein CHLNCDRAFT_34313, partial [Chlorella variabilis]	Chlorella_variabilis	50	3.7e-34
TRINITY_DN15215_c5_g2	XP_024393502.1	uncharacterized aarF domain-containing protein kinase 1-like isoform X1 [Physcomitrella patens]	Physcomitrella_patens	36.2	2.4e-49
TRINITY_DN15216_c0_g1	EFJ26820.1	hypothetical protein SELMODRAFT_96259 [Selaginella moellendorffii]	Selaginella_moellendorffii	34.7	7.2e-64
TRINITY_DN15216_c2_g1	GBG72502.1	hypothetical protein CBR_g12073 [Chara braunii]	Chara_braunii	40.4	6.1e-18
TRINITY_DN15221_c0_g1	OAE34701.1	hypothetical protein AXG93_3205s1090 [Marchantia polymorpha subsp. ruderalis]	Marchantia_polymorpha	44.9	9.9e-54
TRINITY_DN15222_c2_g2	PTQ31295.1	hypothetical protein MARPO_0113s0031 [Marchantia polymorpha]	Marchantia_polymorpha	47.5	2.2e-68
[truncated: 4,058 more rows]
